# Supplementary material for: Evolved bacterial resistance against fluoropyrimidines can lower chemotherapy impact in the Caenorhabditis elegans host
Source: eLife. 2020 Nov 30;9:e59831. doi: 10.7554/eLife.59831 (PMC7725501; doi:10.7554/eLife.59831)
Supplement: Supplementary file 1. [file elife-59831-supp1.xlsx]

## Sheet: ASKA genes RPM
Gene names	LB5FU01	LB5FU02	LBFUDR01	LBFUDR02	LBND01	LBND02	M95FU01	M95FU02	M9FUDR01	M9FUDR02	M9ND01	M9ND02
'aaeA'	472.589	461.546	332.347	477.618	298.419	339.521	206.394	189.444	185.784	190.379	269.364	259.517
'aaeB'	454.117	438.217	349.558	421.958	305.426	307.091	173.704	142.474	191.663	186.646	251.329	257.313
'aaeR'	420.25	345.529	315.73	410.296	319.442	286.574	158.321	147.954	168.146	181.669	256.565	207.966
'aaeX'	431.026	378.316	261.723	368.948	259.875	266.719	141.656	154.999	169.322	158.649	204.205	229.555
'aas'	418.711	396.602	267.065	309.047	346.306	337.536	232.674	252.07	269.269	308.589	277.509	275.819
'aat'	129.308	143.13	201.782	167.511	182.205	218.405	144.22	129.166	118.761	152.428	171.625	207.084
'abgA'	175.489	184.745	367.956	244.905	299.003	282.603	335.23	288.08	366.276	367.071	436.917	401.832
'abgB'	58.4964	81.9686	174.482	127.223	119.718	124.425	235.238	208.231	248.692	252.595	274.019	276.7
'abgR'	213.974	203.03	443.327	267.169	374.921	319.666	351.896	334.266	425.069	401.29	444.48	464.839
'abgT'	204.737	255.994	492.586	337.142	481.207	367.318	387.149	400.806	489.74	434.264	500.331	517.711
'abrB'	87.7445	78.1854	99.7042	97.538	105.702	111.188	114.094	108.03	155.8	171.715	165.807	163.905
'aceA'	346.36	312.742	258.756	313.818	210.82	207.154	187.806	190.226	189.311	186.024	216.422	215.015
'aceB'	320.191	272.388	245.106	288.373	204.98	218.405	158.321	158.913	175.789	163.005	183.261	212.372
'aceE'	0	0	0	0	0	0	0	0	0	0	0	0
'aceF'	872.827	569.997	1101.49	941.453	83.5105	96.6279	2.5639	0.782825	2.93962	3.73293	5.23603	4.84666
'aceK'	306.336	332.288	293.771	336.612	228.34	240.246	190.37	145.605	170.498	245.129	227.476	191.223
'ackA'	149.32	116.017	145.995	153.728	26.8635	35.7391	7.05074	18.7878	4.70339	8.71017	1.16356	2.20303
'acnA'	161.635	202.399	273.593	218.93	253.451	281.28	159.603	158.913	189.899	197.223	247.839	234.843
'acnB'	73.8901	73.1412	64.689	121.392	102.782	110.526	138.451	88.4592	99.359	97.0562	73.3044	57.7193
'acpT'	417.171	340.485	191.1	266.109	272.723	324.961	229.469	217.625	277.5	271.882	233.294	216.778
'acrA'	426.408	351.834	522.853	622.335	558.294	491.081	458.939	449.341	594.978	574.249	541.638	551.197
'acrB'	249.379	320.308	456.977	468.606	411.129	441.444	484.578	421.16	588.511	508.3	520.694	505.815
'acrD'	609.594	655.118	601.192	613.323	844.449	808.1	534.574	519.796	595.566	619.666	668.466	689.107
'acrE'	535.704	488.659	456.384	544.41	342.218	351.434	253.826	225.454	256.335	230.819	304.853	310.627
'acrF'	528.007	474.787	449.856	547.061	401.201	383.202	193.575	230.933	186.372	237.663	310.089	284.19
'acrR'	372.529	472.896	389.914	487.16	627.205	662.497	405.738	380.453	520.312	503.323	440.408	442.368
'acs'	443.341	494.964	294.365	368.948	325.282	392.468	358.947	296.691	315.127	354.006	334.524	375.396
'actP'	629.606	517.663	405.938	456.944	364.409	391.806	257.031	232.499	302.781	288.058	283.327	295.206
'ada'	90.8233	116.017	159.645	185.004	153.589	152.884	256.39	249.721	251.043	266.904	348.487	309.305
'add'	32.3269	37.2011	76.5585	64.6719	67.7428	80.7438	76.9171	90.0249	120.524	87.7238	94.2485	126.894
'ade'	960.572	849.951	616.623	786.135	621.365	598.961	420.48	346.009	419.189	405.023	389.211	418.575
'adhE'	93.9021	78.1854	134.719	96.4778	89.9344	99.2752	53.201	53.2321	91.1281	67.8149	63.4141	61.2441
'adhP'	143.162	212.488	428.49	232.183	417.552	414.97	344.204	382.801	457.404	435.508	402.592	374.955
'adiA'	266.312	257.255	185.165	216.28	143.077	164.135	200.625	191.009	271.621	246.995	245.511	248.501
'adiC'	344.821	283.107	198.221	281.482	189.797	204.507	213.445	200.403	271.621	297.39	233.876	258.635
'adiY'	241.682	199.877	162.613	186.064	144.829	135.014	157.039	159.696	193.427	200.334	178.025	182.851
'aegA'	274.009	346.79	207.124	244.375	390.105	328.27	247.417	237.196	215.18	238.907	189.079	223.387
'aer'	589.582	642.507	383.386	397.573	453.176	426.222	351.896	284.948	367.452	386.358	425.282	386.851
'aes'	218.592	276.171	226.708	263.989	386.017	395.115	217.932	214.494	309.248	243.263	257.729	276.26
'afuB'	166.253	176.548	109.2	120.862	198.556	231.642	179.473	167.525	218.12	194.734	164.062	155.974
'afuC'	204.737	264.821	127.004	206.208	261.627	336.874	179.473	180.05	245.164	251.351	164.062	207.966
'agaA'	215.513	247.167	194.66	242.785	168.773	164.135	140.374	131.515	140.514	121.942	159.99	160.821
'agaB'	260.155	270.496	161.426	208.858	135.486	178.034	156.398	124.469	145.217	153.05	178.025	192.985
'agaD'	317.112	243.384	213.652	208.858	168.773	158.84	138.451	153.434	178.141	138.118	233.294	214.134
'agaI'	130.847	134.933	100.298	98.5982	116.214	90.6714	80.763	64.9745	91.716	85.8574	97.7391	102.661
'agaR'	169.332	123.583	140.654	152.668	122.638	103.246	90.3776	82.1966	95.8315	103.9	144.863	126.894
'agaS'	229.367	203.03	138.874	163.8	137.237	125.749	146.783	108.03	161.679	153.672	178.025	163.465
'agaV'	295.561	278.063	235.017	306.927	204.98	207.154	181.396	138.56	182.844	243.885	204.787	248.942
'agaW'	301.718	255.364	227.302	260.278	209.068	218.405	198.062	173.004	145.805	133.763	194.315	196.951
'agp'	56.957	70.6191	85.4607	76.3341	150.669	101.261	116.658	95.5046	97.5953	117.587	146.027	137.469
'ahpF'	181.647	215.64	162.613	189.245	223.084	219.729	303.182	263.029	318.067	358.361	343.832	285.512
'aidB'	289.403	217.532	207.717	300.565	137.821	138.323	188.447	176.918	178.729	180.425	235.039	259.076
'ais'	150.859	155.74	275.967	265.049	242.356	159.502	377.535	334.266	389.205	353.384	420.046	422.981
'aldB'	943.639	830.405	534.129	622.335	581.069	601.608	369.843	409.417	465.047	453.551	389.211	408.441
'alkA'	132.387	172.134	279.528	183.414	312.434	279.294	226.905	208.231	285.143	217.754	366.522	407.119
'alkB'	101.599	126.736	214.839	183.414	184.541	170.092	248.699	252.852	260.45	245.129	375.248	350.722
'allA'	467.971	649.443	477.749	479.738	868.392	831.265	460.221	432.902	512.081	542.519	525.348	534.454
'allB'	266.312	339.854	218.4	250.736	408.209	391.144	244.853	284.948	352.166	357.117	295.545	316.355
'allC'	223.21	273.649	185.165	250.736	346.306	370.628	291.003	309.216	353.93	337.83	339.178	315.033
'allD'	397.16	577.563	438.58	481.859	762.106	723.385	490.347	473.609	642.6	556.206	580.035	537.098
'allR'	295.561	335.441	457.571	459.595	509.239	468.579	466.63	479.872	549.12	489.636	479.969	489.953
'alpA'	84.6658	105.929	109.2	103.369	131.982	134.352	140.374	118.207	110.53	148.073	164.062	143.637
'alr'	267.852	329.135	207.717	244.375	197.972	238.922	409.584	360.882	413.898	421.821	466.006	417.694
'alsA'	666.551	562.43	398.817	447.932	330.538	342.169	246.135	237.196	321.594	336.586	271.11	321.642
'alsB'	795.858	666.467	443.921	546.531	438.576	431.516	354.46	322.524	397.436	423.065	404.338	418.575
'alsC'	554.176	493.072	355.493	445.812	338.13	309.077	276.261	268.509	295.725	291.791	287.4	306.661
'alsE'	674.248	615.395	497.334	525.327	446.168	476.521	288.439	289.645	339.232	384.492	336.851	331.776
'alx'	665.011	571.258	368.549	400.224	445.584	428.207	296.131	256.767	359.221	368.316	401.429	395.223
'amiA'	332.506	360.662	369.736	368.948	514.495	425.56	347.409	367.928	419.189	370.182	465.424	484.666
'amiB'	258.616	184.745	137.687	199.317	92.2703	91.3332	176.268	145.605	156.388	174.203	202.46	232.64
'amn'	16.9332	15.1327	23.1456	8.48156	27.4475	37.7246	32.6898	32.8786	38.215	37.3293	68.6501	53.7538
'ampD'	218.592	180.331	100.298	130.404	175.781	189.285	118.581	127.6	148.745	132.519	145.445	166.108
'ampE'	181.647	143.76	131.752	144.187	131.398	128.396	126.272	103.333	159.327	154.294	187.333	176.683
'ampG'	295.561	360.662	289.023	383.791	471.279	458.652	343.563	369.493	393.321	392.58	387.466	378.039
'ampH'	486.443	528.382	310.982	367.888	611.437	595.651	410.225	509.619	543.829	499.59	454.952	492.597
'amtB'	269.391	326.613	253.415	322.299	422.224	499.023	285.234	317.827	393.321	347.162	312.416	356.89
'amyA'	63.1145	95.8402	141.841	109.2	150.669	157.517	172.423	215.277	193.427	198.467	262.965	226.471
'ansA'	0	0	0	0	0	0	0	0	0	0	0	0
'ansB'	469.51	377.055	245.106	337.672	307.762	255.468	304.464	273.206	345.111	319.788	302.526	305.339
'ansP'	232.446	198.616	458.164	280.952	402.953	393.13	450.606	423.508	475.042	464.127	473.569	429.59
'apaG'	828.185	783.746	573.892	762.81	740.498	653.231	424.967	478.306	569.698	571.76	818.565	686.904
'apaH'	685.023	711.235	331.16	360.996	292.579	319.004	547.393	526.841	711.975	669.439	323.47	332.657
'aphA'	295.561	238.339	160.832	219.991	229.508	188.623	142.938	193.358	186.372	169.226	162.899	193.426
'appA'	32.3269	37.8316	55.7868	44.5282	64.8228	58.9033	70.5074	56.3634	64.6716	54.1275	68.0683	66.972
'appB'	46.1813	23.96	41.5434	39.7573	57.8149	54.2705	38.4586	36.0099	59.9682	43.5508	68.0683	59.9223
'appC'	23.0907	59.2696	77.7455	73.6836	78.2546	97.9516	92.3005	103.333	87.0127	143.718	146.609	142.756
'apt'	420.25	576.933	449.262	574.096	710.131	716.767	310.873	322.524	391.557	373.293	373.503	348.519
'aqpZ'	138.544	150.066	142.435	114.501	163.517	160.164	127.554	115.075	118.761	155.539	165.226	147.603
'araA'	0	0	0	0	0	0	0	0	0	0	0	0
'araB'	0	0	0	0	0	0	0	0	0	0	0	0
'araC'	257.076	255.994	222.554	266.109	252.867	234.951	175.627	166.742	166.382	179.181	233.876	223.387
'araE'	641.921	705.56	494.366	530.628	571.142	626.758	450.606	470.478	550.884	581.093	481.133	435.759
'araF'	35.4057	57.378	112.167	80.0447	117.382	115.159	120.503	118.207	148.157	113.232	196.642	162.583
'araG'	87.7445	75.6633	160.832	121.392	143.077	159.502	135.246	160.479	152.86	149.939	237.366	221.184
'araH'	72.3508	111.603	207.717	151.078	213.156	209.802	212.804	192.575	223.999	250.728	343.251	301.374
'araJ'	378.687	382.1	239.765	303.216	548.366	523.511	365.356	339.746	482.685	389.469	365.94	394.782
'arcA'	70.8114	44.1369	135.906	86.4059	7.59186	19.855	3.84586	3.91412	7.05508	6.8437	18.617	11.8963
'arcB'	424.868	333.549	244.513	222.111	137.237	147.589	124.99	104.899	126.991	96.434	133.81	122.048
'argA'	1283.84	1282.49	849.266	1016.73	1152.79	1142.33	778.786	872.85	1032.39	1001.05	939.576	941.133
'argB'	546.479	387.774	397.63	545.47	246.444	289.884	194.857	163.61	184.02	159.272	217.586	206.644
'argC'	467.971	465.329	381.012	482.919	241.772	211.125	208.317	206.666	196.954	200.956	219.913	197.391
'argD'	0	0	0	0	0	0	0	0	0	0	0	0
'argE'	391.002	283.107	310.982	412.416	201.476	223.038	170.5	164.393	188.135	149.939	232.712	211.05
'argF'	1.53938	0	0	0	0	0	0.640976	0	0	0.622155	0	0.440605
'argG'	310.954	211.857	151.93	235.893	165.853	174.724	124.99	86.8936	117.585	122.564	134.973	165.227
'argH'	324.809	252.211	203.563	314.878	167.021	160.826	121.144	111.944	124.64	131.275	136.137	139.672
'argO'	190.883	165.829	163.206	180.233	115.63	131.705	182.037	147.171	182.844	211.533	176.861	181.529
'argP'	306.336	233.295	204.156	252.857	226.004	212.449	224.342	233.282	226.35	277.481	240.857	257.754
'argT'	100.06	126.105	176.856	196.666	158.261	127.734	183.319	180.05	165.206	187.269	272.855	252.467
'arnT'	92.3627	58.639	113.948	93.2972	92.8543	101.923	160.885	139.343	183.432	159.272	211.768	223.387
'aroA'	163.174	170.873	231.456	195.076	324.114	358.053	14.1015	23.4847	5.87923	3.73293	1.74534	6.60908
'aroB'	233.985	237.709	97.9237	131.464	153.005	237.599	37.8176	27.3989	12.9343	4.97724	2.9089	2.64363
'aroC'	189.344	252.211	196.441	147.367	345.138	352.096	4.48683	7.04542	3.52754	6.8437	0.581781	7.04968
'aroD'	47.7207	55.4864	45.6977	51.9496	63.0708	70.1545	4.48683	4.69695	3.52754	3.73293	0.581781	1.32182
'aroE'	0	0	0	0	0	0	0	0	0	0	0	0
'aroF'	150.859	189.158	176.263	162.21	221.916	261.425	150.629	166.742	179.905	205.933	204.787	196.069
'aroG'	86.2052	73.7717	62.3151	81.635	115.046	129.058	122.426	115.858	135.222	146.829	151.263	177.564
'aroH'	75.4295	71.2496	137.687	61.4913	73.5827	103.908	45.5093	46.1867	58.7923	59.7269	47.706	53.7538
'aroL'	374.069	392.188	483.684	557.663	590.997	645.289	357.665	369.493	429.184	370.182	294.963	342.791
'aroM'	614.212	634.941	420.775	470.727	790.722	779.641	555.726	594.164	658.474	621.533	577.126	608.917
'aroP'	130.847	117.278	113.354	157.439	150.085	136.338	116.658	112.727	129.343	162.382	150.099	175.361
'arpA'	477.207	407.321	362.021	495.641	357.401	340.183	249.34	223.888	236.933	245.129	259.474	242.774
'arsB'	361.754	317.786	258.756	306.927	263.963	262.087	245.494	255.984	285.143	263.794	216.422	207.966
'arsC'	407.935	363.184	268.845	259.218	296.083	237.599	203.83	221.539	219.883	211.533	164.062	206.203
'arsR'	651.157	595.848	465.286	473.907	385.433	432.84	353.819	346.009	332.177	404.401	335.106	275.819
'artI'	83.1264	96.4707	105.045	100.188	115.63	117.807	78.84	76.7168	107.002	102.656	138.464	125.132
'artJ'	90.8233	138.716	156.084	170.691	234.764	191.27	141.015	144.823	165.206	165.493	203.623	205.763
'artM'	87.7445	104.668	117.508	151.078	150.669	135.676	99.3513	126.035	112.881	147.451	148.936	163.024
'artP'	103.138	175.917	185.165	162.74	193.3	230.98	164.09	115.075	159.915	165.493	229.222	231.758
'artQ'	107.756	125.475	188.726	185.534	200.308	192.594	137.81	118.207	136.398	163.627	198.387	183.732
'ascB'	217.052	226.99	148.369	174.402	221.332	217.744	224.983	237.196	239.285	254.461	248.42	233.961
'ascF'	118.532	131.78	94.9563	117.682	179.869	164.135	138.451	125.252	196.954	139.985	125.083	170.955
'ascG'	217.052	204.291	197.628	212.569	212.572	235.613	208.317	199.62	268.093	273.126	300.781	271.853
'aslA'	213.974	170.242	138.874	210.979	96.3582	89.3477	80.763	72.8027	71.7266	75.2807	93.6667	103.542
'aslB'	286.324	222.576	198.815	283.602	127.31	124.425	110.248	117.424	114.057	119.454	139.046	130.86
'asmA'	87.7445	110.342	62.9086	65.202	212.572	183.328	99.3513	78.2825	95.2436	114.476	147.772	164.786
'asnA'	403.317	274.91	254.602	421.958	188.045	237.599	144.22	147.954	144.041	136.252	170.462	158.618
'asnB'	126.229	136.824	146.589	144.717	171.109	146.927	182.037	173.004	197.542	192.868	247.839	260.838
'asnC'	310.954	236.448	316.323	417.187	143.661	158.84	80.763	73.5855	54.0889	67.1927	84.3582	70.4968
'aspA'	198.58	202.399	91.9889	99.6584	147.165	153.546	433.3	386.715	442.118	464.127	458.443	514.627
'aspC'	26.1694	32.1569	20.7717	25.4447	35.6234	54.2705	99.3513	97.0703	95.2436	105.144	28.5072	38.7733
'asr'	93.9021	123.583	266.471	147.897	217.244	200.536	235.238	232.499	279.852	307.967	359.54	304.458
'astA'	110.835	152.588	379.232	276.181	241.188	260.763	253.826	225.454	304.544	276.237	450.88	419.456
'astB'	101.599	114.125	229.676	196.666	228.924	185.314	205.112	211.363	257.51	226.464	305.435	313.27
'astC'	121.611	128.628	275.967	167.511	195.052	195.241	265.364	199.62	246.928	236.419	338.015	318.558
'astD'	84.6658	96.4707	175.076	145.777	172.277	174.724	151.27	167.525	166.382	179.181	262.965	269.21
'astE'	95.4414	138.716	276.56	168.041	256.955	165.459	203.189	248.938	226.35	217.132	329.87	325.167
'atoA'	75.4295	78.1854	144.808	143.656	109.79	119.792	214.727	192.575	198.718	181.669	256.565	264.804
'atoB'	112.375	100.254	182.197	165.39	139.573	176.048	253.185	257.549	299.253	265.66	293.799	313.27
'atoC'	98.5202	69.358	137.687	126.693	112.126	111.188	196.139	188.661	205.773	204.067	292.636	286.834
'atoD'	103.138	107.82	177.45	182.884	109.206	119.13	178.191	257.549	244.576	215.888	312.416	269.21
'atoE'	96.9808	117.909	148.963	185.534	101.03	137.662	253.826	207.449	262.214	209.666	325.215	281.987
'atoS'	69.272	89.5349	132.939	134.645	112.71	124.425	191.011	210.58	225.175	239.53	261.801	260.398
'atpA'	1259.21	1293.84	584.575	679.585	297.835	398.425	219.214	258.332	290.434	298.012	252.493	242.333
'atpB'	1647.13	1788.81	1154.31	1422.78	307.762	293.855	189.088	240.327	214.004	202.2	266.456	245.417
'atpC'	3826.89	5021.52	988.733	881.552	381.929	384.526	181.396	190.226	229.878	214.643	115.193	151.128
'atpE'	1009.83	893.457	610.688	849.746	196.22	191.932	142.938	121.338	148.745	113.232	158.244	165.227
'atpF'	1607.11	1482.37	989.92	1442.93	358.569	378.57	193.575	263.812	199.894	197.223	270.528	256.873
'atpG'	929.784	1175.93	169.141	186.064	363.825	415.632	280.106	299.822	489.152	426.798	113.447	135.706
'atpI'	192.422	102.776	159.052	197.196	72.4147	74.1255	73.7122	83.7623	100.535	122.564	155.917	121.607
'avtA'	1131.44	988.036	637.988	776.593	573.478	596.975	402.533	418.811	520.312	386.358	468.915	436.199
'azoR'	160.095	196.094	375.078	244.375	376.089	314.372	352.537	407.069	536.774	444.841	428.191	413.728
'bacA'	503.377	515.141	351.338	434.68	370.249	405.043	274.338	248.155	295.138	337.208	335.687	371.871
'baeR'	126.229	232.034	340.656	284.132	359.153	326.285	296.772	267.726	296.313	288.68	486.95	454.705
'baeS'	238.604	273.649	388.727	349.334	370.833	303.782	292.285	248.155	286.319	279.348	360.704	368.787
'barA'	580.346	636.833	353.712	392.272	586.325	602.932	451.888	412.549	475.63	487.769	467.752	441.487
'basR'	394.081	237.709	202.376	254.447	186.293	213.111	160.244	198.838	221.647	232.064	212.932	201.797
'basS'	244.761	150.696	112.167	153.728	136.654	119.792	133.323	123.686	156.976	137.496	157.663	146.281
'bax'	581.885	384.622	271.219	397.573	317.69	295.84	228.828	224.671	260.45	221.487	225.731	234.843
'bcp'	469.51	593.957	483.09	543.88	697.283	679.043	410.866	410.2	465.635	439.863	465.424	534.014
'bcr'	83.1264	114.125	199.408	170.161	141.909	138.323	258.313	226.236	255.159	259.439	303.689	340.147
'bcsA'	737.362	555.495	408.312	479.208	307.762	382.541	307.668	295.125	289.846	337.208	275.182	288.156
'bcsB'	534.164	460.285	338.282	446.342	273.307	308.415	249.981	273.989	310.424	288.68	261.219	253.348
'bcsC'	549.558	461.546	327.599	329.191	379.593	331.579	276.261	291.994	303.368	335.341	260.056	270.532
'bcsE'	374.069	290.673	198.221	235.363	194.468	237.599	199.344	165.176	169.322	191.624	166.389	144.078
'bcsF'	618.83	528.382	378.638	434.68	331.706	440.782	277.543	278.686	288.082	324.765	231.549	255.992
'bcsG'	531.085	450.827	287.836	349.334	400.033	340.183	249.981	293.559	329.237	282.458	235.039	244.977
'bcsZ'	378.687	346.16	202.969	257.097	269.219	207.816	197.421	191.009	211.064	223.976	179.77	177.123
'bdm'	204.737	197.355	389.321	275.651	381.929	391.144	394.2	349.923	467.399	422.443	378.739	386.411
'betA'	417.171	537.209	300.299	404.995	585.741	590.357	503.166	512.75	535.598	575.493	482.878	502.29
'betB'	557.255	570.627	414.84	406.585	605.013	553.294	514.063	444.644	514.433	491.502	361.286	377.158
'betI'	449.498	533.426	334.128	404.464	547.198	545.352	369.202	419.594	467.987	466.616	467.17	486.428
'betT'	497.219	592.696	331.16	375.309	649.98	652.569	415.993	452.473	580.868	557.451	489.277	462.636
'bglA'	167.792	159.523	121.663	135.175	133.15	111.85	187.806	198.838	202.834	217.754	198.387	226.031
'bglB'	241.682	180.331	174.482	249.676	109.206	113.836	116.658	144.04	124.052	111.366	151.263	134.825
'bglF'	263.234	221.315	256.976	296.325	132.566	165.459	136.528	140.126	152.86	150.561	204.787	182.411
'bglG'	0	0	0	0	0	0	0	0	0	0	0	0
'bglH'	0	0	0	0	0	0	0	0	0	0	0	0
'bglX'	0	0	0	0	0	0	0	0	0	0	0	0.440605
'bioA'	47.7207	84.4907	77.152	81.635	136.654	134.352	9.61464	9.3939	6.46716	8.08801	4.07246	4.40605
'bioB'	41.5632	54.8559	48.6651	46.1185	61.9029	66.8453	9.61464	3.1313	2.93962	6.8437	0	0
'bioC'	61.5751	100.884	132.345	73.1535	137.821	137	6.40976	3.1313	3.52754	5.59939	2.32712	2.64363
'bioD'	60.0357	76.2938	56.9738	67.3224	83.5105	87.3622	10.2556	0.782825	2.93962	1.86646	4.65424	0.440605
'bioF'	84.6658	80.077	104.452	110.79	125.558	109.203	10.2556	3.91412	4.70339	4.97724	1.16356	4.84666
'bioH'	206.277	186.636	166.174	190.835	155.341	101.923	7.05074	3.1313	9.9947	4.97724	2.9089	0.881211
'bipA'	107.756	55.4864	113.948	105.489	30.3674	50.2994	47.4322	75.934	71.1387	79.0137	52.3603	57.7193
'blr'	47.7207	78.8159	115.728	58.8408	145.413	112.512	209.599	201.969	229.878	255.083	254.82	254.229
'bolA'	289.403	276.802	289.023	353.045	386.601	387.835	316.642	299.039	400.376	378.892	358.377	371.43
'brnQ'	418.711	468.482	334.128	419.837	576.397	578.444	393.559	343.66	502.087	427.42	453.207	442.808
'btuB'	451.038	377.055	310.389	446.872	279.731	285.251	255.108	208.231	198.718	196.601	254.82	240.57
'btuC'	35.4057	65.5748	157.865	98.0681	94.0223	100.599	142.938	154.999	161.679	159.272	217.586	190.341
'btuD'	58.4964	81.338	185.165	100.188	139.573	118.468	138.451	148.737	174.025	146.206	175.116	205.763
'btuE'	53.8782	68.097	157.865	115.031	109.79	128.396	150.629	151.085	150.508	176.692	221.658	211.931
'btuF'	243.222	329.135	309.202	354.635	249.363	280.618	208.317	165.176	204.009	253.217	253.656	265.685
'btuR'	121.611	203.03	278.341	172.282	247.611	258.777	191.652	154.216	171.674	144.962	231.549	208.847
'cadA'	372.529	394.08	286.649	332.901	190.965	179.357	237.161	240.327	266.917	266.904	292.054	285.953
'cadB'	343.281	260.408	256.976	273.53	117.382	146.265	233.956	211.363	198.718	208.422	269.946	291.681
'cadC'	346.36	254.103	256.382	282.542	161.765	207.154	176.268	182.398	211.652	224.598	221.658	283.309
'caiA'	297.1	316.525	258.163	350.925	236.516	191.27	164.731	141.691	208.713	218.998	267.619	270.532
'caiB'	387.923	411.104	299.706	315.938	310.098	251.497	210.881	163.61	205.773	240.152	281.582	310.186
'caiC'	357.136	350.573	271.813	343.503	249.947	293.193	178.191	177.701	208.125	192.246	238.53	279.784
'caiD'	415.632	349.312	285.462	332.901	304.842	324.299	165.372	178.484	241.636	230.197	296.708	264.363
'caiE'	0	0	0	0	0	0	0	0	0	0	0	0
'caiF'	549.558	516.402	369.143	437.331	438.576	442.106	298.695	261.463	353.342	321.032	429.936	356.89
'caiT'	274.009	245.275	232.643	235.363	151.253	158.84	116.017	122.903	180.492	210.288	225.149	220.303
'carA'	275.549	228.251	175.669	266.109	188.045	187.299	0	0	0	1.24431	0	0
'carB'	375.608	320.308	271.219	337.142	322.946	304.444	0.640976	0.782825	1.17585	0	0	0
'cbl'	112.375	114.125	255.195	190.305	318.858	270.029	187.165	194.141	221.059	183.536	297.29	348.519
'cbpA'	61.5751	50.4422	107.419	81.635	125.558	93.9805	87.8137	86.1107	89.9523	115.099	128.574	140.553
'cbpM'	64.6539	95.2096	155.491	133.055	197.388	162.811	139.092	119.772	150.508	128.164	175.698	173.158
'cbrA'	999.056	721.323	554.308	877.842	580.485	557.265	306.386	358.534	390.381	380.137	374.085	390.376
'cbrC'	172.41	174.656	177.45	215.22	116.798	137	126.272	131.515	160.503	153.05	175.698	156.415
'cchA'	398.699	402.907	376.858	420.367	515.079	475.859	419.839	343.66	397.436	412.489	508.476	588.208
'cchB'	297.1	302.023	318.697	387.501	390.689	344.154	313.437	275.554	274.56	288.058	382.23	397.426
'ccmA'	90.8233	81.9686	145.995	135.175	128.478	135.014	177.55	174.57	176.377	136.874	204.205	224.268
'ccmB'	92.3627	135.563	238.578	212.039	171.109	156.855	280.106	243.459	266.329	238.907	345.578	372.752
'ccmC'	101.599	127.367	137.687	189.245	203.228	199.212	253.185	294.342	282.203	260.683	337.433	376.718
'ccmD'	72.3508	85.7517	113.948	121.392	103.366	79.4202	208.958	177.701	216.944	222.109	228.64	265.685
'ccmE'	81.587	102.776	177.45	167.511	110.374	137.662	206.394	195.706	243.988	213.399	257.729	255.992
'ccmF'	101.599	148.804	205.343	172.812	163.517	143.618	323.693	259.898	349.814	284.947	386.302	380.242
'ccmG'	58.4964	54.2254	84.2737	87.4661	64.8228	73.4637	136.528	135.429	161.091	133.141	172.789	211.491
'ccmH'	107.756	133.672	216.026	175.992	164.101	188.623	274.338	250.504	313.363	283.703	336.851	348.078
'cdaR'	135.465	180.961	144.808	169.101	212.572	207.816	153.193	152.651	161.091	170.47	191.988	175.802
'cdh'	352.518	306.436	231.456	298.975	206.732	191.932	169.218	149.52	156.388	170.47	172.207	172.277
'cedA'	67.7326	99.6233	176.263	141.006	168.773	158.84	172.423	178.484	214.004	163.627	283.327	249.823
'cfa'	64.6539	89.5349	181.604	115.561	131.982	133.029	144.22	159.696	171.674	177.936	206.532	175.361
'chaA'	201.659	208.705	255.789	304.806	272.139	277.971	183.96	185.529	184.02	199.09	360.704	291.681
'chaB'	93.9021	123.583	208.31	175.992	208.484	191.27	155.757	144.823	187.548	148.073	259.474	209.728
'chbA'	107.756	141.238	267.658	160.62	177.533	212.449	230.11	196.489	231.642	225.22	279.255	289.918
'chbC'	124.69	149.435	243.919	210.979	196.804	198.55	248.699	252.07	225.175	273.748	266.456	296.968
'chbF'	73.8901	71.8801	162.019	90.1166	123.222	117.145	150.629	152.651	155.212	149.939	242.021	224.268
'chbG'	67.7326	70.6191	162.019	120.862	164.685	146.265	198.062	162.045	194.603	181.047	237.366	242.333
'chbR'	112.375	116.648	189.319	131.464	150.085	183.99	205.753	187.878	180.492	174.826	264.128	275.819
'cheA'	0	0	0	0	0	0	0	0	0	0	0	0
'cheB'	246.3	247.797	481.31	302.156	491.719	418.28	353.178	392.195	390.969	397.557	577.708	614.644
'cheR'	383.305	489.92	1024.93	684.356	780.794	788.245	656.359	590.25	642.6	683.748	993.681	1096.23
'cheW'	0	0	0	0	0	0	0	0	0	0	0	0
'cheY'	197.04	254.733	420.182	374.779	470.695	427.545	393.559	362.448	466.811	456.039	658.576	571.024
'cheZ'	306.336	385.252	535.91	508.364	644.724	608.888	548.675	516.664	640.836	571.138	849.981	860.943
'chiA'	110.835	93.318	111.574	125.103	90.5183	96.6279	105.12	88.4592	83.4851	90.2124	126.828	136.147
'chpB'	221.67	164.568	139.467	182.884	115.046	123.101	139.092	187.878	148.745	157.405	186.17	199.154
'chpR'	360.214	363.814	233.83	290.493	369.081	320.99	270.492	268.509	315.127	311.7	267.619	290.8
'chpS'	494.14	232.034	583.981	573.036	41.4632	39.0483	66.6615	66.5401	87.0127	72.7921	110.538	87.6805
'cirA'	146.241	131.78	191.693	185.004	199.14	167.444	272.415	259.115	295.725	249.484	333.36	347.197
'citA'	138.544	160.784	146.589	159.559	245.276	217.744	141.656	175.353	220.471	223.976	219.331	243.214
'citB'	115.453	129.889	123.443	130.934	224.836	162.811	143.579	131.515	193.427	194.734	193.151	171.836
'citC'	56.957	70.6191	56.9738	47.7088	109.206	92.6569	76.2761	75.934	75.8421	100.789	87.2671	115.439
'citD'	66.1933	84.4907	129.378	110.26	127.894	109.865	107.043	97.8531	122.876	102.033	146.027	133.944
'citE'	83.1264	112.864	116.915	110.79	139.573	147.589	107.043	102.55	99.359	86.4795	113.447	105.745
'citF'	155.477	173.395	193.474	169.101	259.291	289.884	155.757	160.479	257.51	235.175	265.874	257.754
'citG'	253.997	310.219	362.021	490.87	429.816	443.429	196.139	245.807	268.093	245.129	268.201	264.363
'citT'	130.847	148.804	118.695	116.091	185.709	205.831	140.374	130.732	180.492	172.337	165.226	224.709
'citX'	140.083	185.375	130.565	150.548	231.26	191.27	176.909	169.873	200.482	209.044	201.878	227.793
'clcA'	177.028	153.849	112.167	140.476	172.277	164.135	147.424	134.646	149.92	153.672	177.443	175.802
'clcB'	177.028	264.191	404.158	327.6	422.224	436.149	396.123	377.322	438.591	410.622	524.184	566.178
'cld'	140.083	145.021	232.643	203.027	316.522	315.695	177.55	180.05	231.054	187.891	384.557	341.029
'clpA'	124.69	141.869	168.547	166.981	210.236	242.232	144.861	129.949	139.926	171.715	290.89	276.7
'clpB'	89.2839	97.1012	100.891	115.031	127.894	109.865	100.633	90.8077	129.343	109.499	156.499	161.702
'clpP'	280.167	293.826	172.108	196.666	209.652	167.444	64.0976	68.8886	79.9576	58.4826	67.4866	64.769
'clpS'	63.1145	90.1654	119.882	116.091	147.165	111.85	92.9415	87.6764	115.821	141.229	165.226	132.622
'clpX'	561.873	756.633	383.98	376.899	377.257	436.149	278.825	285.731	253.983	284.947	198.969	206.644
'cls'	233.985	281.846	314.543	342.443	372.001	375.26	248.058	209.797	277.5	299.256	296.708	265.685
'cmk'	12.315	9.45791	2.37391	1.59029	0.583989	2.64734	1.92293	7.04542	2.35169	0	0	0.440605
'cmr'	266.312	251.58	315.73	359.406	425.728	346.801	273.697	245.024	297.489	297.39	368.267	398.748
'cmtA'	260.155	213.749	157.865	182.354	164.101	146.927	221.137	255.984	290.434	243.263	232.13	238.808
'cmtB'	76.9689	71.2496	59.3477	60.4311	43.7992	43.6811	112.171	100.202	108.178	111.988	122.756	110.151
'coaE'	0	0	0	0	0	0	0	0	0	0	0	0
'cobB'	41.5632	79.4464	71.2173	81.635	123.806	95.3042	111.53	95.5046	119.348	144.962	186.752	168.752
'cobC'	66.1933	84.4907	61.7216	54.07	84.6785	97.2897	70.5074	108.813	106.414	83.9909	102.975	120.285
'cobS'	109.296	122.953	247.48	197.196	249.363	257.454	169.859	147.954	175.201	189.135	318.816	383.327
'cobT'	113.914	155.74	305.641	195.076	291.411	315.033	183.319	184.747	233.406	186.024	367.104	346.316
'cobU'	110.835	148.174	280.121	154.258	301.922	317.681	177.55	188.661	221.647	188.513	372.921	386.851
'codA'	467.971	744.653	344.81	429.379	753.346	796.187	503.166	451.69	562.055	599.135	496.259	579.396
'codB'	549.558	610.35	345.404	453.764	719.475	719.414	460.221	472.043	632.018	600.379	562	614.644
'cof'	292.482	336.702	254.602	321.239	482.375	481.154	314.719	320.175	366.276	385.736	350.232	366.143
'copA'	386.384	380.208	289.617	398.633	529.678	516.893	298.695	324.089	408.019	393.202	379.321	366.584
'corA'	298.639	288.151	231.456	272.47	123.222	105.894	142.938	77.4997	140.514	116.965	151.263	144.519
'cpdA'	363.293	343.007	279.528	238.014	224.836	205.831	246.135	186.312	265.741	266.904	282.745	271.853
'cpdB'	440.262	337.332	232.643	336.612	275.643	215.096	220.496	241.11	322.182	309.211	358.377	324.726
'cpsB'	153.938	186.636	160.832	187.124	365.577	357.391	253.185	214.494	298.077	281.836	450.298	515.949
'cpxA'	340.203	319.047	525.821	603.781	203.812	188.623	148.065	132.297	95.2436	104.522	68.0683	84.1556
'cpxP'	344.821	274.279	197.034	302.156	179.285	191.27	156.398	119.772	161.679	169.848	201.878	189.02
'cpxR'	492.601	299.5	237.984	384.321	270.971	279.956	157.039	151.085	157.563	159.894	218.75	259.517
'crcA'	84.6658	162.676	115.728	135.175	188.045	192.594	128.836	153.434	178.141	134.385	210.023	197.832
'crcB'	123.15	131.78	136.5	141.536	161.181	183.99	153.834	151.085	174.613	197.845	174.534	191.663
'creA'	338.663	333.549	213.058	256.037	261.627	227.671	199.984	133.08	241.636	232.064	249.002	230.437
'creB'	409.475	371.381	245.7	324.95	266.299	236.275	173.704	187.878	217.532	206.555	229.222	262.16
'creC'	446.42	377.055	241.545	287.313	277.979	294.516	171.141	173.004	231.054	239.53	260.056	279.784
'creD'	310.954	325.352	214.839	238.544	221.916	217.744	193.575	158.131	201.658	234.552	219.913	213.253
'crl'	184.725	196.094	187.539	215.22	188.045	219.729	187.806	180.05	204.597	232.686	206.532	199.154
'crp'	0	0	0	0	0	0	0	0	0	0	0	0
'crr'	728.126	896.61	482.497	548.121	439.744	412.323	39.7405	39.9241	69.375	78.3915	123.919	168.311
'csdA'	367.911	336.702	287.836	388.031	325.866	274	246.776	230.15	296.313	278.725	290.309	307.102
'csgA'	13.8544	26.4821	35.0151	43.468	42.0472	34.4154	31.4078	46.1867	45.858	44.173	33.1615	59.9223
'csgB'	81.587	91.4265	128.191	74.7438	130.814	130.381	124.99	102.55	141.102	115.721	149.518	140.994
'csgD'	80.0477	86.3822	128.191	112.381	160.597	110.526	135.887	126.035	154.036	164.871	179.188	189.02
'csgE'	60.0357	68.097	124.037	107.61	139.573	97.9516	85.2498	110.378	103.475	103.278	138.464	145.4
'csgF'	110.835	130.519	172.702	153.198	240.02	198.55	167.936	196.489	194.603	167.36	230.385	188.138
'csiE'	32.3269	56.7475	100.298	109.73	112.71	104.57	97.4283	87.6764	112.881	121.32	137.882	174.039
'csiR'	146.241	140.608	113.354	90.1166	152.421	120.454	112.812	123.686	118.173	131.275	134.973	138.35
'cspA'	537.243	407.321	401.784	435.21	290.243	270.029	217.291	205.1	201.658	191.624	221.658	241.011
'cspB'	116.993	177.809	345.404	178.113	321.778	273.338	273.056	296.691	318.654	259.439	375.248	335.741
'cspC'	290.942	364.445	1094.37	694.428	689.691	654.555	597.39	638.002	637.309	573.005	811.002	820.407
'cspD'	63.1145	95.2096	97.3302	73.1535	147.165	137.662	90.3776	101.767	107.59	116.343	150.681	154.212
'cspE'	126.229	168.981	216.619	215.22	197.972	188.623	117.299	116.641	141.69	125.675	176.28	175.802
'cspF'	152.398	185.375	389.914	239.074	368.497	345.478	373.048	389.847	423.305	358.983	392.12	411.085
'cspG'	158.556	216.901	308.015	278.831	439.744	393.13	324.975	283.383	289.846	312.322	440.99	411.525
'cspH'	274.009	319.047	375.078	394.393	523.254	502.333	365.356	392.195	480.333	496.48	489.859	540.182
'cspI'	152.398	160.154	433.238	209.919	323.53	332.903	307.027	385.15	359.221	352.762	413.646	424.303
'cstA'	426.408	638.724	506.236	495.111	826.345	802.144	402.533	440.73	549.12	452.929	530.002	532.251
'cueO'	275.549	353.095	286.056	381.14	353.314	373.275	193.575	194.923	240.461	287.436	331.033	305.78
'cueR'	617.291	701.777	509.797	617.034	926.791	1014.59	488.424	497.094	636.721	676.282	543.965	590.852
'cusA'	281.706	402.907	285.462	294.204	465.44	465.932	274.338	258.332	326.297	362.094	339.178	330.454
'cusB'	460.274	506.944	405.938	507.834	711.299	666.468	434.582	410.2	448.586	450.44	536.984	486.428
'cusC'	320.191	295.717	513.951	580.457	542.526	516.893	220.496	223.105	203.421	174.826	320.561	304.899
'cusR'	398.699	586.39	465.286	519.496	720.643	761.772	487.783	424.291	540.889	545.63	571.89	547.232
'cusS'	340.203	479.831	348.371	325.48	598.005	583.738	300.618	366.362	432.712	429.909	408.992	377.599
'cutA'	229.367	172.764	162.613	196.666	118.55	109.865	158.962	123.686	147.569	138.741	164.644	185.054
'cutC'	263.234	402.276	664.101	481.329	694.363	663.159	555.085	589.467	628.49	628.999	884.888	847.284
'cvpA'	146.241	169.612	186.945	223.171	172.277	168.768	47.4322	38.3584	40.5667	38.5736	57.5963	88.1211
'cvrA'	249.379	213.118	399.41	361.527	342.218	411.661	282.029	284.948	315.127	299.256	493.35	433.996
'cyaA'	195.501	116.648	161.426	235.893	130.814	118.468	17.3063	20.3534	37.6271	23.6419	32.5797	26.4363
'cyaY'	253.997	267.974	201.189	270.35	140.157	139.647	114.094	93.1562	75.2542	105.144	112.284	97.8144
'cybB'	110.835	93.9486	229.082	139.416	233.012	203.845	226.905	194.923	238.109	235.175	227.476	210.169
'cybC'	314.033	288.151	262.91	261.868	249.947	234.29	200.625	204.317	278.088	240.774	299.035	274.497
'cycA'	374.069	296.978	261.13	292.614	222.5	221.053	180.114	149.52	191.663	205.311	175.698	169.633
'cynR'	270.931	359.401	188.132	222.111	430.4	358.053	296.772	307.65	343.935	360.85	299.617	315.033
'cynS'	477.207	669.62	321.665	440.511	739.331	755.154	466.63	421.943	517.96	589.181	468.333	519.033
'cynT'	466.432	513.88	334.128	340.853	557.71	549.985	360.228	332.701	429.772	491.502	404.919	422.1
'cynX'	566.491	642.507	317.51	391.212	698.451	673.086	462.785	388.281	532.071	538.786	436.917	583.361
'cyoA'	700.417	599.001	718.107	876.781	578.733	573.811	520.472	485.351	701.393	564.294	527.675	542.826
'cyoB'	832.804	831.666	783.39	1005.07	918.615	939.805	737.763	668.532	799.576	833.687	789.476	686.022
'cyoC'	849.737	674.034	808.316	983.861	854.376	847.81	702.51	753.077	871.302	727.921	726.644	801.461
'cyoD'	738.901	644.399	755.496	906.997	842.697	831.265	613.414	652.093	703.744	649.53	595.162	663.552
'cyoE'	782.004	735.825	817.811	1009.31	948.983	853.105	737.122	644.265	801.34	714.234	696.391	725.236
'cysA'	417.171	456.502	437.393	466.486	513.327	514.246	321.129	268.509	383.914	413.111	361.286	367.465
'cysB'	195.501	164.568	432.051	386.441	317.69	297.164	0.640976	0	0	0	1.74534	0
'cysC'	266.312	292.565	217.806	218.4	246.444	244.879	16.6654	10.1767	11.7585	15.5539	12.2174	14.9806
'cysD'	135.465	187.267	121.069	128.814	165.853	173.401	58.9698	61.0603	92.304	106.388	60.5052	60.8035
'cysE'	143.162	69.358	112.167	116.621	47.8871	52.285	0	0	0	0	0	0
'cysG'	123.15	106.559	90.2085	110.26	88.1824	78.7583	13.4605	14.0908	15.8739	16.176	9.30849	11.8963
'cysH'	400.238	506.313	280.121	329.191	399.449	406.367	3.20488	3.1313	4.11546	1.24431	4.65424	3.96545
'cysI'	218.592	300.131	220.18	201.437	235.932	217.082	45.5093	37.5756	61.732	69.0592	45.9607	49.3478
'cysJ'	274.009	247.167	201.189	198.257	173.445	194.579	37.8176	29.7473	35.2754	42.3065	39.5611	38.7733
'cysK'	133.926	151.957	146.589	155.849	150.669	176.048	6.40976	8.61107	3.52754	11.8209	0.581781	2.20303
'cysN'	238.604	250.95	164.393	199.317	252.283	240.908	73.7122	74.3684	101.711	114.476	85.5217	83.2744
'cysP'	406.396	447.044	418.401	461.715	447.336	493.729	328.821	277.903	360.397	385.736	354.304	354.247
'cysQ'	129.308	98.9928	148.963	120.332	91.6863	90.0095	0	0	0	0.622155	0	0
'cysU'	467.971	512.619	535.91	622.865	599.173	596.975	433.3	334.266	484.449	526.965	471.242	476.294
'cysW'	427.947	540.362	566.771	553.952	607.933	563.221	339.076	331.918	515.021	521.988	427.609	471.007
'cysZ'	140.083	170.873	144.215	154.789	256.371	207.816	130.759	96.2875	126.991	135.008	157.081	166.989
'cytR'	320.191	269.235	502.675	331.311	223.084	237.599	411.507	370.276	341.583	400.046	207.114	214.134
'dacA'	40.0238	28.3737	6.52825	12.1922	63.0708	39.0483	54.483	67.3229	68.1991	88.9681	91.9213	85.4774
'dacB'	0	0	0	0	0	0	0	0	0	0	0	0
'dacD'	104.678	143.76	255.789	215.22	311.266	336.874	198.062	142.474	202.246	207.8	348.487	372.311
'dadA'	118.532	158.893	238.578	177.583	224.252	249.512	178.191	196.489	187.548	187.891	375.248	349.4
'dadX'	106.217	126.105	137.093	124.043	143.661	184.652	144.861	159.696	166.382	126.297	248.42	207.084
'dam'	113.914	72.5106	144.215	166.451	42.0472	60.227	49.3551	38.3584	47.0339	35.4628	66.323	74.4623
'damX'	329.427	322.83	89.0216	109.73	255.203	274	103.838	143.257	128.167	139.363	183.843	200.475
'dapF'	0	0	0	0	0	0	0	0	0	0	0	0
'dbpA'	144.702	182.853	277.747	212.569	286.155	238.261	219.214	249.721	306.896	289.302	325.215	325.607
'dcd'	107.756	157.001	56.3803	69.4428	355.65	314.372	41.0225	53.2321	44.0943	40.4401	162.899	160.821
'dcm'	147.78	181.592	322.852	245.965	315.938	269.367	171.141	164.393	221.059	192.868	346.741	330.895
'dcp'	73.8901	132.411	257.569	136.765	231.844	177.372	225.624	241.11	243.988	209.666	278.673	258.195
'dcrB'	489.522	461.546	229.676	381.14	338.13	365.995	327.539	266.943	299.841	366.449	285.072	270.972
'dctA'	120.071	105.298	68.2499	65.202	75.3346	65.5216	73.0713	68.8886	89.9523	83.9909	58.7598	63.0066
'dcuA'	330.966	326.613	286.649	283.072	181.037	175.386	214.727	207.449	253.395	215.266	165.226	189.46
'dcuB'	521.849	413.626	318.104	384.321	285.571	294.516	292.285	273.989	314.539	339.697	354.304	335.301
'dcuD'	598.818	492.442	456.384	485.569	366.161	348.787	221.778	191.009	195.191	214.643	278.091	261.279
'dcuR'	543.4	426.867	332.347	389.092	300.171	248.85	288.439	252.852	361.573	377.648	331.033	366.143
'dcuS'	0	0	0	0	0	0	0	0	0	0	0	0
'ddg'	147.78	254.103	281.902	284.662	302.506	309.739	242.289	225.454	266.329	246.373	304.271	355.568
'ddlA'	515.692	601.523	344.217	397.573	722.979	686.985	521.754	569.114	690.81	644.552	516.621	524.32
'ddlB'	0	0	0	0	0	0	0	0	0	0	0	0
'ddpA'	224.749	228.881	436.206	291.554	439.744	379.893	426.89	469.695	489.152	510.789	514.294	440.165
'ddpB'	197.04	209.335	452.823	307.457	388.353	433.502	378.817	347.574	533.834	429.287	458.443	477.616
'ddpC'	98.5202	109.081	300.299	220.521	251.699	232.304	269.851	281.034	333.353	276.859	289.727	307.102
'ddpD'	98.5202	135.563	435.612	279.361	253.451	266.719	253.826	273.206	372.155	300.501	275.182	285.512
'ddpF'	158.556	180.961	382.199	243.845	387.185	342.83	340.999	353.054	382.738	390.713	325.215	369.668
'ddpX'	80.0477	79.4464	185.758	115.561	181.037	176.048	169.859	181.615	211.652	214.643	186.752	183.732
'deaD'	100.06	80.7075	182.197	154.789	33.2874	46.9903	36.5356	27.3989	35.2754	42.3065	61.087	44.9417
'dedA'	89.2839	73.7717	84.2737	96.4778	181.621	211.787	228.187	204.317	195.191	205.933	278.091	307.102
'dedD'	10.7756	5.67475	1.78043	3.18059	9.34383	5.29468	80.763	87.6764	138.162	128.164	133.81	128.216
'def'	706.575	590.174	577.453	790.376	405.873	499.685	289.08	230.933	322.77	305.478	379.903	391.258
'degP'	47.7207	40.9843	38.576	34.4563	60.7349	50.9613	69.2254	81.4138	79.9576	100.167	102.393	107.067
'degQ'	657.314	616.656	549.56	657.851	388.353	467.255	258.954	246.59	272.209	283.703	364.195	348.959
'degS'	0	0.630527	0	0	0	1.32367	0	0	0	0	0	0
'deoA'	207.816	194.833	89.0216	85.8758	115.046	117.145	82.0449	74.3684	91.716	93.3232	140.209	156.415
'deoB'	340.203	279.954	183.978	234.833	440.328	428.869	858.267	842.32	376.271	457.284	509.058	498.325
'deoC'	829.725	818.425	597.038	553.952	195.052	227.009	185.242	212.928	239.873	252.595	218.75	226.912
'deoD'	1260.75	1357.53	639.175	816.35	487.631	441.444	398.046	371.842	469.751	464.127	485.205	548.994
'deoR'	1046.78	1119.19	1758.47	1088.82	168.189	180.019	151.27	150.302	85.2489	79.6358	198.387	205.322
'dgkA'	417.171	536.579	132.939	97.0079	273.307	258.116	76.2761	57.929	72.9025	57.8604	71.559	74.4623
'dgoA'	146.241	126.105	109.793	154.789	93.4383	116.483	99.9922	96.2875	121.112	128.786	108.793	102.22
'dgoD'	178.568	144.391	118.695	163.27	119.134	130.381	123.708	112.727	122.876	144.34	118.683	137.469
'dgoK'	218.592	121.061	111.574	148.427	105.702	91.995	102.556	124.469	136.398	123.809	135.555	148.043
'dgoR'	206.277	113.495	129.971	190.305	122.054	99.2752	112.812	127.6	114.057	121.942	114.029	136.588
'dgoT'	1017.53	844.907	587.542	925.02	621.365	735.96	348.05	320.175	366.864	426.176	448.553	419.897
'dgsA'	86.2052	76.2938	176.856	117.682	133.734	193.918	255.108	271.64	249.867	256.328	255.983	302.696
'dgt'	113.914	149.435	99.1107	166.451	167.021	182.005	138.451	109.595	164.619	121.32	198.387	163.905
'dhaH'	107.756	146.282	203.563	145.777	216.66	160.164	142.297	140.908	119.348	105.766	249.002	199.154
'dhaK'	177.028	229.512	274.78	287.313	192.716	230.319	131.4	112.727	228.114	201.578	265.292	268.769
'dhaL'	204.737	153.849	260.536	239.604	234.764	211.787	157.68	132.297	235.757	199.09	275.182	255.11
'dhaR'	158.556	252.841	321.071	318.059	338.714	310.401	228.187	213.711	184.608	189.757	303.108	291.24
'dicB'	138.544	106.559	290.804	184.474	261.043	269.367	292.285	284.165	335.704	303.612	381.648	355.568
'dicC'	175.489	180.961	401.191	216.81	369.081	295.178	364.715	382.019	415.074	444.219	411.901	456.467
'dinB'	201.659	274.91	121.663	118.742	270.387	195.241	211.522	191.009	262.214	251.973	229.803	223.827
'dinD'	1434.7	1215.03	786.357	948.875	785.466	751.844	539.702	457.17	456.229	558.695	450.298	451.62
'dinF'	657.314	535.318	449.856	523.206	369.665	413.647	303.182	335.049	357.457	354.006	359.54	342.791
'dinG'	56.957	54.2254	69.4368	46.6486	82.3425	79.4202	80.122	65.7573	87.0127	74.0364	109.957	111.033
'dinI'	61.5751	98.9928	132.345	126.163	181.621	167.444	133.323	118.207	158.739	125.675	201.878	218.1
'dinJ'	238.604	255.994	161.426	180.763	297.251	256.792	228.828	214.494	285.731	253.839	247.257	267.447
'dipZ'	98.5202	71.8801	48.6651	41.3476	46.1352	54.2705	70.5074	80.631	84.073	105.144	99.4845	87.6805
'djlA'	623.448	589.543	379.232	483.449	582.821	497.7	249.34	223.888	382.15	324.765	390.375	372.752
'djlB'	124.69	144.391	156.678	149.488	235.348	209.14	154.475	156.565	195.191	224.598	212.35	224.709
'djlC'	130.847	165.829	176.856	161.68	258.123	237.599	194.216	187.095	246.928	212.155	258.892	255.11
'dkgA'	0	0	0	0	0	0	0	0	0	0	0	0
'dkgB'	84.6658	119.8	87.2411	73.1535	96.3582	126.41	124.99	140.126	124.64	149.317	158.244	136.147
'dksA'	15.3938	8.82738	1.18695	2.12039	1.16798	7.28018	0	0	0	0	1.16356	0
'dld'	127.768	123.583	140.061	128.814	167.605	154.208	199.344	184.747	218.707	195.357	210.605	263.041
'dmsA'	212.434	245.906	351.932	311.167	293.747	336.874	196.78	204.317	266.329	271.259	358.959	322.523
'dmsB'	121.611	139.347	200.002	208.328	186.877	215.758	133.323	149.52	131.107	139.363	193.733	175.802
'dmsC'	49.2601	88.9044	97.9237	87.4661	87.5984	103.246	54.483	66.5401	75.8421	75.9029	86.6853	86.3586
'dmsD'	173.95	205.552	406.532	265.579	347.474	346.801	370.484	320.175	369.216	394.446	456.116	422.54
'dnaB'	409.475	504.422	148.369	121.392	79.4226	78.7583	76.2761	68.8886	52.3252	54.1275	22.1077	30.4018
'dnaJ'	44.642	52.3338	40.9499	61.4913	37.9593	44.3429	79.481	65.7573	82.3093	66.5706	97.1574	103.102
'dnaK'	0	0	0	0	0	0	0	0.782825	0.587923	0	1.16356	0.881211
'dnaQ'	3.07876	3.78316	2.37391	2.12039	0	11.2512	1.92293	3.1313	0	0	0	0.881211
'dos'	226.289	260.408	558.462	333.431	471.863	476.521	502.525	434.468	640.249	587.936	509.64	526.964
'dppA'	512.613	470.373	272.999	415.597	404.121	293.855	303.182	266.16	349.814	356.495	260.056	279.344
'dppB'	606.515	517.032	315.73	435.21	325.282	378.57	291.644	283.383	320.418	354.006	278.091	307.983
'dppC'	541.861	430.65	259.943	365.767	296.083	299.811	207.035	234.065	268.093	273.748	264.71	218.981
'dppD'	548.019	487.398	278.341	359.406	323.53	336.874	246.135	256.767	294.55	293.657	270.528	262.601
'dppF'	503.377	438.847	274.78	313.818	324.698	251.497	232.674	231.716	226.938	253.839	190.824	185.495
'dps'	15.3938	34.679	39.763	28.6253	44.3832	50.2994	164.09	134.646	169.322	160.516	209.441	212.372
'dsbB'	207.816	288.151	634.427	400.754	262.211	279.956	142.938	143.257	115.233	172.959	70.3955	85.0368
'dsbC'	611.133	517.663	278.341	376.899	418.72	443.429	395.482	334.266	427.42	371.426	388.629	400.51
'dsbG'	315.573	438.217	312.762	350.395	560.046	518.217	314.719	315.478	414.486	421.821	442.153	420.778
'dsdA'	157.017	155.11	226.115	190.835	228.924	269.367	96.1464	136.994	67.0233	80.258	84.3582	82.3932
'dsdC'	172.41	244.645	272.999	268.759	333.458	307.091	269.851	234.847	335.704	257.572	356.05	334.419
'dsdX'	177.028	165.829	297.332	232.713	254.035	259.439	295.49	257.549	256.335	308.589	383.393	340.588
'dsrB'	83.1264	73.7717	140.061	110.26	190.965	201.198	165.372	108.813	120.524	156.783	211.768	197.391
'dtd'	515.692	391.557	302.08	391.212	251.699	223.7	198.703	194.923	214.592	258.816	253.075	241.011
'dusB'	0	0	0	0	0	0	0	0	0	0	0	0
'dusC'	27.7088	32.7874	45.6977	69.9729	54.895	72.8018	83.3269	75.1512	89.9523	77.1472	119.847	118.523
'eaeH'	220.131	329.766	178.637	178.643	308.346	297.164	260.877	302.17	306.308	312.322	294.963	296.087
'eamA'	170.871	181.592	395.849	293.144	311.85	342.169	382.022	407.852	479.158	404.401	422.373	430.031
'ebgA'	297.1	301.392	160.832	239.074	247.027	228.333	142.297	169.09	185.196	190.379	201.878	218.981
'ebgC'	591.121	700.516	343.03	466.486	453.76	448.062	336.512	385.933	406.843	361.472	410.155	485.106
'ebgR'	560.334	494.333	348.965	480.268	361.489	383.864	353.178	299.822	388.617	395.068	422.955	431.353
'eco'	109.296	122.953	193.474	193.486	152.421	180.019	266.005	277.903	329.825	277.481	358.959	350.281
'ecpD'	190.883	224.468	210.684	240.134	256.955	272.014	168.577	155.782	206.361	210.288	254.238	272.735
'eda'	172.41	198.616	352.525	315.408	382.513	391.806	262.8	295.908	269.269	255.083	123.337	166.549
'edd'	195.501	196.094	442.734	325.48	378.425	405.043	405.738	371.842	464.459	429.287	634.723	608.917
'ego'	164.713	134.933	302.08	166.981	218.412	190.608	231.392	248.938	273.972	230.197	279.836	290.8
'elaA'	61.5751	92.6875	124.63	137.295	123.222	119.13	166.654	141.691	158.151	167.982	223.404	250.704
'elaB'	0	0	0	0	0	0	0	0	0	0	0	0
'elaC'	100.06	129.889	210.684	172.282	137.237	135.676	187.165	254.418	226.35	199.712	289.727	261.279
'elaD'	76.9689	66.8359	150.15	133.585	120.302	121.778	146.783	147.954	188.723	169.226	223.986	198.713
'elbA'	164.713	178.439	289.617	212.039	286.739	272.014	241.648	248.938	233.406	279.348	350.232	363.059
'elbB'	0	0	0	0	0	0	0	0	0	0	0	0
'emrA'	247.84	348.682	275.967	246.495	374.337	360.038	351.255	320.958	333.94	397.557	379.903	363.059
'emrB'	241.682	293.826	192.88	236.424	332.29	331.579	254.467	267.726	282.791	306.722	318.234	314.152
'emrD'	1126.82	969.121	573.892	740.016	692.027	688.308	234.597	230.15	161.091	167.36	178.607	174.48
'emrE'	463.353	501.9	405.345	387.501	705.459	608.226	369.843	432.119	477.982	448.574	460.188	429.15
'emrK'	260.155	369.489	393.475	372.129	463.688	430.854	360.869	393.761	395.672	416.222	506.149	509.78
'emrY'	104.678	109.712	157.865	141.536	138.405	166.782	167.936	151.085	153.448	137.496	183.843	201.357
'emtA'	109.296	132.411	207.717	166.451	218.412	230.319	145.502	178.484	158.151	144.34	243.766	248.061
'endA'	498.758	381.469	358.46	371.598	280.315	308.415	281.388	255.201	350.99	319.165	253.075	276.7
'entA'	349.439	565.583	342.436	433.09	689.107	647.274	363.433	363.231	394.497	387.602	396.774	406.679
'entB'	0	0	0	0	0	0	0	0	0	0	0	0
'entC'	435.644	533.426	340.656	451.643	626.621	677.719	387.79	353.837	428.008	502.701	431.099	435.759
'entD'	304.797	348.051	291.397	262.398	503.399	475.859	257.672	249.721	344.523	273.748	204.205	286.834
'entE'	350.978	528.382	410.686	408.705	657.572	667.791	375.612	360.882	368.628	454.795	440.99	401.832
'entF'	147.78	175.917	124.037	157.969	213.74	230.98	123.067	122.121	154.036	139.363	128.574	123.369
'envC'	289.403	334.81	200.595	223.171	271.555	290.545	54.483	58.7119	91.1281	95.1897	109.957	90.3241
'envR'	746.598	668.99	628.492	738.426	463.104	491.081	280.747	263.029	261.038	271.882	342.087	370.99
'envY'	435.644	484.876	399.41	402.344	662.244	675.733	385.227	353.054	471.515	444.219	464.843	457.789
'envZ'	61.5751	55.4864	13.0565	30.7457	40.2953	56.256	30.7668	26.616	43.5063	26.1305	40.1429	22.0303
'epd'	197.04	146.913	137.687	181.293	129.646	143.618	15.3834	14.0908	4.70339	6.8437	43.0518	31.283
'eptA'	280.167	235.817	210.091	277.771	185.125	187.961	219.855	164.393	241.636	216.51	253.075	255.992
'eptB'	495.68	495.595	262.317	291.024	369.665	321.652	242.93	241.893	241.636	282.458	241.439	285.072
'erfK'	127.768	145.652	273.593	200.377	293.747	315.695	176.909	168.307	227.526	222.109	320.561	355.568
'essD'	381.766	510.097	450.449	413.476	702.539	698.236	448.042	459.518	521.488	520.744	521.275	514.627
'etp'	15.3938	32.7874	40.3564	45.5884	54.311	57.5796	28.2029	36.0099	54.0889	48.5281	54.6874	43.1793
'eutA'	303.257	348.051	362.021	433.09	445	452.695	305.746	295.908	315.127	353.384	476.478	497.443
'eutB'	483.365	483.614	474.782	547.061	534.35	579.767	401.892	378.104	472.69	414.355	555.6	603.629
'eutC'	355.596	403.538	362.615	472.317	505.151	487.11	367.279	287.297	398.024	414.355	467.752	441.046
'eutE'	158.556	189.158	140.061	190.835	183.957	191.27	126.272	90.8077	162.267	133.763	189.66	176.242
'eutG'	350.978	411.734	389.914	400.224	493.471	475.859	367.279	358.534	339.82	361.472	467.17	457.348
'eutH'	275.549	323.461	324.632	359.406	419.888	438.135	287.798	249.721	326.885	316.677	398.52	404.476
'eutI'	243.222	255.364	272.999	338.732	308.346	277.309	255.749	214.494	293.374	261.927	352.559	342.35
'eutJ'	341.742	357.509	333.534	379.02	419.888	442.106	338.435	278.686	381.562	397.557	374.667	374.074
'eutL'	287.864	343.637	343.623	348.804	412.88	407.028	266.646	261.463	316.891	349.651	426.445	459.111
'eutP'	366.372	398.493	424.336	426.198	538.438	491.743	348.05	312.347	429.184	419.332	459.025	476.735
'eutQ'	347.899	416.779	393.475	486.63	496.975	482.478	403.174	374.973	426.832	428.043	525.93	569.703
'eutT'	337.124	441.369	443.327	451.643	458.432	542.043	411.507	382.019	404.491	419.332	535.82	490.834
'evgA'	232.446	261.038	376.858	316.468	347.474	349.449	328.821	285.731	294.55	283.08	407.246	339.707
'evgS'	327.888	324.722	350.745	328.13	426.896	369.304	316.642	343.66	287.495	365.827	470.661	437.521
'exbB'	341.742	284.368	242.139	206.738	236.516	215.758	155.116	178.484	142.865	176.07	72.1408	78.4277
'exbD'	341.742	335.441	211.278	260.278	237.684	291.869	183.319	180.05	136.986	187.269	59.9234	75.7841
'exo'	420.25	411.104	296.145	313.288	388.353	325.623	330.103	292.776	370.98	368.938	336.851	368.787
'exoX'	173.95	269.235	490.806	418.247	466.607	487.772	491.629	448.559	530.307	518.877	735.371	713.34
'exuR'	466.432	470.373	324.038	401.814	313.018	295.84	208.317	227.802	255.747	216.51	344.414	304.018
'exuT'	755.835	795.726	448.075	520.026	471.279	515.569	318.565	385.15	365.1	382.003	418.882	397.867
'fabF'	118.532	195.463	677.751	466.486	227.756	234.951	89.0957	104.899	88.7764	102.656	140.791	144.078
'fabH'	7.69689	0	5.34129	13.7825	1.75197	1.9855	1.92293	6.2626	1.76377	1.24431	0	0.440605
'fabR'	286.324	209.335	182.197	315.938	151.837	158.179	119.222	100.202	86.4247	111.366	135.555	137.909
'fadA'	358.675	266.713	234.423	338.732	163.517	160.826	104.479	104.899	106.414	107.633	137.882	183.292
'fadB'	392.541	312.742	321.665	394.923	171.109	236.275	163.449	144.04	168.734	156.161	212.35	204
'fadD'	109.296	182.853	613.655	428.319	283.235	293.193	325.616	300.605	347.463	335.341	399.683	430.912
'fadE'	141.623	213.749	115.728	129.874	214.324	221.715	192.934	196.489	228.702	202.2	237.366	236.605
'fadH'	249.379	239.6	168.547	195.606	174.613	227.009	129.477	127.6	131.695	115.721	136.137	173.158
'fadL'	200.119	189.158	477.156	343.503	317.69	252.821	236.52	284.165	251.043	246.373	312.998	315.914
'fadR'	220.131	271.127	121.663	84.8156	390.689	365.995	138.451	145.605	174.613	156.161	178.607	177.123
'fbaB'	226.289	288.151	477.749	389.092	470.695	456.004	366.638	374.19	401.552	393.202	518.367	579.396
'fbp'	100.06	104.668	80.7129	85.8758	110.958	104.57	141.015	144.823	159.327	158.649	154.754	172.277
'fcl'	260.155	394.08	271.813	213.099	249.947	266.058	183.319	169.09	188.135	174.826	282.745	233.521
'fdhD'	584.964	447.674	458.758	525.857	254.035	240.908	241.648	197.272	228.114	198.467	230.385	211.05
'fdhE'	491.062	358.14	395.849	471.787	185.125	268.705	223.701	192.575	209.889	181.047	199.551	206.203
'fdhF'	0	0	0	0	0	0	0	0	0	0	0	0
'fdnG'	158.556	187.897	449.856	277.241	399.449	393.792	465.349	433.685	428.008	482.792	431.099	408.882
'fdnH'	141.623	155.74	400.597	262.398	322.946	416.956	362.792	351.488	414.486	392.58	389.211	390.817
'fdnI'	101.599	85.1212	168.547	109.73	181.037	172.739	157.68	173.787	214.004	208.422	170.462	185.054
'fdoG'	309.415	267.344	302.673	319.119	164.685	178.695	134.605	126.818	141.69	135.63	150.681	159.94
'fdoI'	186.265	131.15	119.289	179.173	95.1903	74.1255	80.763	67.3229	91.1281	85.2352	86.1035	81.0714
'fdrA'	157.017	192.311	125.224	150.018	255.787	234.29	244.212	255.201	306.308	240.774	233.876	268.329
'fdx'	133.926	201.769	128.785	148.957	126.142	128.396	119.862	121.338	108.178	121.32	101.23	103.102
'feaB'	237.064	273.018	546.592	388.031	540.19	457.99	482.655	483.003	569.11	540.653	570.145	562.212
'feaR'	132.387	177.809	366.769	250.206	328.786	323.637	309.591	308.433	384.502	388.847	382.812	372.311
'fecA'	780.465	753.48	415.434	454.294	554.206	501.009	367.279	374.19	408.607	442.352	420.627	419.897
'fecB'	563.412	561.8	337.688	399.164	417.552	469.241	315.36	267.726	360.985	364.583	405.501	363.499
'fecC'	173.95	171.503	104.452	128.284	137.821	127.734	88.4547	85.3279	128.167	124.431	134.973	142.756
'fecD'	592.661	587.651	381.012	415.066	519.167	514.246	317.283	343.66	422.717	417.466	351.395	383.327
'fecE'	500.298	421.192	294.958	320.709	349.81	405.705	282.029	263.029	328.061	316.677	378.157	341.91
'fecI'	411.014	385.883	250.447	289.433	313.018	313.71	235.879	255.984	327.473	288.058	342.669	284.19
'fecR'	591.121	503.791	318.697	442.101	395.361	384.526	309.591	270.857	354.518	400.046	424.7	401.391
'feoA'	306.336	227.62	210.091	279.361	171.109	171.415	199.344	203.534	223.411	214.643	199.551	179.326
'feoB'	247.84	186.006	166.767	195.076	147.165	113.836	132.041	140.126	176.377	147.451	115.774	141.875
'fepA'	332.506	418.67	289.617	329.191	586.909	530.792	266.646	274.772	370.392	357.739	331.615	353.365
'fepB'	0	0	0	0	0	0	0	0	0	0	0	0
'fepD'	0	0	0	0	0	0	0	0	0	0	0	0
'fepE'	548.019	663.315	478.343	530.628	961.246	964.293	478.809	403.938	523.84	622.777	632.396	630.947
'fepG'	247.84	259.777	225.521	266.639	436.24	412.323	80.763	89.242	20.5773	36.085	3.49068	4.84666
'fhiA'	230.907	283.107	213.652	236.954	333.458	285.913	238.443	266.943	325.71	286.813	250.166	266.566
'fhlA'	217.052	237.078	121.069	147.897	206.148	182.005	179.473	154.999	208.713	161.76	188.497	162.583
'fhuA'	129.308	159.523	96.1433	148.957	134.902	146.265	150.629	142.474	181.08	184.78	203.623	222.065
'fhuB'	110.835	105.298	74.7781	65.202	113.294	114.497	101.915	87.6764	124.64	113.854	136.137	122.929
'fhuC'	298.639	353.726	201.782	255.507	310.098	279.956	228.828	171.439	255.747	232.064	271.11	278.022
'fhuD'	135.465	147.543	106.232	144.187	144.829	137	85.8908	135.429	129.931	169.226	146.027	151.128
'fhuE'	96.9808	84.4907	150.15	118.212	165.853	169.43	120.503	114.292	121.112	123.187	180.934	196.51
'fhuF'	298.639	290.673	173.889	217.34	217.244	173.401	187.165	186.312	206.361	235.175	216.422	189.02
'fic'	118.532	76.9243	84.8672	88.5263	67.1588	60.8888	49.3551	55.5806	63.4957	59.7269	58.1781	72.6999
'fieF'	315.573	314.633	208.31	309.577	210.236	221.053	214.086	196.489	211.064	228.953	274.019	233.521
'fimA'	412.553	403.538	287.243	281.482	244.108	263.41	265.364	205.883	266.329	299.879	272.273	273.616
'fimB'	387.923	424.345	282.495	286.783	332.29	373.937	280.106	288.08	331.589	317.299	307.762	312.389
'fimC'	381.766	389.666	210.684	231.123	232.428	227.009	220.496	289.645	272.796	261.305	267.619	288.596
'fimE'	417.171	453.349	293.771	313.288	341.05	322.975	180.755	187.878	216.356	223.976	267.037	267.007
'fimF'	363.293	329.766	206.53	214.69	259.875	290.545	226.905	183.964	219.883	264.416	270.528	243.214
'fimG'	310.954	360.031	192.88	207.798	249.363	225.686	186.524	187.878	258.686	245.129	243.184	206.644
'fimH'	326.348	321.569	226.708	209.389	275.059	244.217	178.832	183.181	230.466	211.533	250.166	217.659
'fimI'	380.226	381.469	220.773	252.326	252.867	293.193	218.573	228.585	249.279	261.927	322.306	267.007
'fimZ'	407.935	541.623	461.725	397.573	689.107	713.458	458.298	426.64	503.262	479.059	479.969	537.979
'fis'	863.591	524.599	3494.99	1986.81	21.6076	27.7971	18.5883	15.6565	11.7585	13.0653	25.0166	19.3866
'fiu'	7.69689	15.1327	17.8043	14.8427	27.4475	26.4734	21.7932	20.3534	11.7585	27.3748	31.9979	23.3521
'fixA'	350.978	366.967	252.821	311.167	287.907	318.343	195.498	144.823	225.763	223.354	298.453	319.879
'fixB'	314.033	302.023	263.504	337.142	242.356	234.951	137.81	144.04	166.97	218.998	230.385	263.041
'fixC'	103.138	93.9486	77.7455	75.804	72.4147	82.0675	51.919	37.5756	82.8972	74.0364	71.559	73.5811
'fixX'	287.864	298.87	205.343	265.579	244.108	249.512	181.396	147.171	195.778	179.803	210.605	251.145
'fklB'	90.8233	107.19	84.2737	84.8156	74.1666	77.4347	55.1239	68.1058	52.9131	95.1897	87.2671	94.7301
'fkpA'	213.974	208.074	172.108	238.014	171.109	137.662	141.015	145.605	136.986	126.92	164.644	186.817
'fkpB'	731.205	578.194	392.882	542.82	491.719	442.106	253.185	228.585	284.555	289.924	297.872	291.681
'fldB'	1277.68	1180.98	795.853	899.046	720.059	641.318	510.858	442.296	582.044	543.763	414.81	462.636
'flgB'	0	0	0	0	0	0	0	0	0	0	0	0
'flgC'	89.2839	135.563	189.913	177.053	160.597	190.608	150.629	128.383	129.343	175.448	230.385	234.402
'flgD'	112.375	100.254	145.995	161.68	174.029	161.488	151.911	104.116	122.876	139.363	194.897	215.015
'flgE'	61.5751	113.495	140.061	148.957	155.341	150.898	112.812	110.378	105.238	133.141	201.296	170.955
'flgF'	40.0238	68.097	105.045	119.272	124.974	107.879	97.4283	76.7168	91.716	77.7694	133.228	155.534
'flgG'	83.1264	104.037	157.271	173.342	211.988	246.864	170.5	174.57	185.784	181.669	286.236	232.199
'flgH'	92.3627	103.406	168.547	145.247	197.972	209.802	148.706	169.09	151.684	161.138	223.986	213.253
'flgI'	87.7445	100.884	164.393	135.175	172.861	178.034	176.268	126.035	152.86	157.405	238.53	206.644
'flgJ'	49.2601	64.3138	100.298	94.3574	122.638	111.188	89.7366	88.4592	90.5402	103.9	154.172	132.622
'flgK'	58.4964	89.5349	102.078	95.4176	123.222	153.546	101.915	82.1966	88.1885	103.278	160.571	163.024
'flgL'	115.453	95.8402	158.458	144.717	179.285	242.232	174.345	147.171	165.206	153.672	243.184	219.862
'flgN'	72.3508	107.82	192.88	152.138	236.516	225.686	194.216	154.216	162.267	179.181	253.656	269.65
'flhA'	334.045	439.478	749.562	623.925	781.378	793.54	740.327	616.866	769.004	752.185	1023.93	1045.56
'flhB'	343.281	450.827	753.716	649.37	792.474	705.516	678.794	690.451	784.29	782.671	1025.68	1073.31
'flhE'	318.651	402.907	667.662	564.554	704.875	749.859	770.453	678.709	780.762	710.501	944.812	920.865
'fliA'	49.2601	44.1369	128.191	87.9962	114.462	92.6569	100.633	109.595	96.4194	103.278	140.791	163.905
'fliC'	69.272	74.4022	119.289	86.936	110.958	130.381	120.503	113.51	127.579	133.763	231.549	208.406
'fliD'	70.8114	75.0328	125.817	87.4661	122.054	125.087	107.684	89.242	142.865	141.851	166.971	222.946
'fliE'	56.957	69.9885	155.491	124.573	100.446	119.13	52.56	66.5401	68.1991	55.9939	88.4307	106.626
'fliF'	86.2052	89.5349	218.993	134.115	171.109	162.15	169.859	146.388	167.558	145.584	279.836	267.888
'fliG'	100.06	95.8402	167.361	149.488	185.709	201.198	155.116	163.61	181.08	162.382	278.673	297.409
'fliH'	66.1933	61.7917	104.452	110.79	141.325	125.749	105.761	128.383	130.519	149.939	249.584	201.357
'fliI'	60.0357	68.7275	131.752	109.2	135.486	96.6279	124.99	131.515	189.899	136.874	233.294	198.713
'fliJ'	20.0119	23.3295	42.7304	28.6253	29.7835	40.3719	45.5093	33.6615	43.5063	47.2838	57.5963	66.5314
'fliK'	26.1694	40.3538	75.9651	47.1787	76.5026	53.6086	57.0469	58.7119	77.6059	64.0819	98.9027	111.473
'fliL'	60.0357	54.2254	99.7042	108.14	130.814	114.497	139.733	109.595	122.288	137.496	164.644	209.728
'fliM'	40.0238	44.7674	95.5498	76.3341	103.366	130.381	108.966	83.7623	112.881	125.675	200.133	177.123
'fliN'	86.2052	81.338	159.052	118.212	148.333	162.811	126.913	118.989	134.047	148.695	230.967	222.065
'fliO'	83.1264	101.515	132.345	119.272	176.365	158.179	164.731	125.252	142.277	144.34	247.839	213.694
'fliP'	69.272	57.378	129.378	109.2	137.237	120.454	128.836	132.297	130.519	128.164	200.714	205.763
'fliQ'	75.4295	99.6233	201.189	135.705	240.02	211.787	186.524	153.434	155.8	205.311	294.963	252.467
'fliR'	66.1933	112.864	160.832	143.656	181.037	174.063	146.143	122.903	153.448	154.917	226.313	215.015
'fliS'	50.7995	61.1612	110.98	109.73	158.261	116.483	124.349	127.6	119.936	146.829	204.205	222.506
'fliT'	69.272	66.2054	167.361	98.0681	147.165	165.459	167.295	168.307	179.317	190.379	243.766	241.892
'fliY'	41.5632	75.6633	146.589	109.73	152.421	117.145	141.656	147.954	141.69	115.721	204.787	262.601
'fliZ'	73.8901	78.1854	106.232	86.4059	151.837	152.884	130.118	130.732	155.212	133.763	201.296	189.02
'flk'	140.083	124.844	167.954	173.872	190.381	186.637	171.782	159.696	170.498	152.428	226.313	268.769
'flu'	126.229	124.214	209.497	171.222	245.276	249.512	171.141	169.873	155.8	179.181	317.07	329.132
'flxA'	203.198	226.99	448.075	295.264	380.177	380.555	352.537	404.72	482.097	455.417	415.973	434.437
'fnr'	229.367	209.335	385.167	275.651	314.77	259.439	321.77	384.367	453.289	371.426	289.727	330.454
'focA'	157.017	150.066	210.684	200.907	176.365	168.768	200.625	173.004	234.581	220.243	235.039	234.402
'focB'	61.5751	73.7717	84.2737	102.309	111.542	92.6569	96.1464	129.949	113.469	130.653	160.571	150.687
'folA'	0	0	0	0	0	0	0	0	0	0	0	0
'folB'	0	0	0	0	0	0	0	0	0	0	0	0
'folC'	0	0	0	0	0	0	0	0	0	0	0	0
'folE'	0	0	0	0	0	0	0	0	0	0	0	0
'folK'	0	0	0	0	0	0	0	0	0	0	0	0
'folM'	81.587	98.3623	87.8346	65.7321	162.349	155.531	167.936	177.701	236.933	203.445	267.037	257.754
'folX'	96.9808	114.125	185.758	192.425	167.605	183.328	191.652	191.792	206.949	173.581	314.743	285.953
'fpr'	412.553	366.336	293.771	374.249	252.867	275.985	198.062	205.1	198.718	218.376	220.495	233.961
'frc'	330.966	437.586	481.903	409.235	472.447	472.55	385.227	378.104	426.832	478.437	553.273	573.227
'frdA'	301.718	211.227	197.628	224.761	125.558	144.28	172.423	188.661	236.933	217.754	215.259	230.877
'fre'	851.276	566.844	981.611	838.614	248.779	256.13	317.924	288.862	305.132	350.895	353.723	363.94
'frlA'	183.186	163.937	142.435	196.666	143.661	121.778	125.631	93.1562	138.75	140.607	148.936	162.583
'frlB'	127.768	84.4907	78.9325	125.633	85.8464	86.0385	66.0205	74.3684	96.4194	80.8801	122.174	129.979
'frlC'	350.978	249.689	238.578	309.577	214.324	232.966	171.782	180.833	183.432	180.425	225.731	221.184
'frlD'	310.954	271.127	244.513	321.239	226.588	193.256	196.139	191.792	225.763	209.044	255.402	237.046
'frlR'	170.871	129.258	157.865	150.548	63.6548	69.4927	109.607	96.2875	92.8919	85.2352	120.429	129.097
'frmA'	329.427	471.004	269.439	261.338	475.951	502.333	358.947	373.407	416.838	402.534	382.23	396.104
'frmB'	275.549	304.545	199.408	206.208	346.89	363.347	222.419	247.373	308.66	299.256	235.039	269.21
'frmR'	444.88	518.924	288.43	411.886	691.443	609.55	432.018	410.983	565.582	558.695	467.17	540.182
'frsA'	312.494	402.907	243.919	329.191	401.201	369.304	358.947	341.312	397.436	425.554	343.832	309.746
'fruA'	297.1	346.79	556.088	518.966	455.512	521.526	528.164	524.493	576.165	553.096	657.994	663.552
'fruB'	212.434	197.986	306.828	303.216	195.636	232.304	221.137	264.595	271.621	268.149	361.868	351.162
'fruK'	73.8901	58.639	109.2	119.272	46.7191	38.3864	442.273	287.297	122.288	130.653	158.244	133.063
'fruR'	181.647	233.926	148.369	164.86	150.085	146.265	171.141	165.176	175.201	189.135	261.801	225.149
'frvA'	317.112	280.585	214.839	289.963	169.357	165.459	128.836	129.949	132.871	144.962	151.845	141.875
'frvB'	370.99	234.556	195.254	290.493	186.877	107.217	119.222	121.338	132.871	139.985	140.209	140.112
'frvX'	318.651	290.673	210.091	291.024	165.269	150.898	139.092	142.474	152.86	154.917	166.971	172.717
'frwB'	363.293	312.111	275.967	420.367	161.765	176.71	151.911	193.358	182.844	167.982	208.859	197.832
'frwC'	404.856	279.324	320.478	418.777	191.549	168.106	166.013	143.257	165.206	173.581	196.06	188.579
'frwD'	521.849	395.341	327.006	476.558	266.299	314.372	190.37	173.787	187.548	189.757	192.569	234.843
'fsaA'	100.06	134.933	146.589	143.656	223.084	236.275	151.27	181.615	166.97	158.027	185.006	209.728
'fsaB'	323.269	278.063	233.83	358.876	163.517	172.739	146.783	122.121	136.986	141.851	157.663	146.281
'fsr'	367.911	477.309	350.151	386.441	573.478	596.313	392.277	381.236	388.029	395.69	367.104	377.158
'ftn'	137.005	111.603	248.073	193.486	244.108	256.792	224.342	230.15	212.828	250.106	334.524	320.761
'ftsB'	15.3938	10.719	1.78043	3.71068	9.34383	10.5894	7.69171	8.61107	8.81885	9.33232	11.6356	6.16847
'ftsE'	126.229	163.307	77.152	70.503	29.1995	50.9613	15.3834	19.5706	18.2256	27.3748	3.49068	6.16847
'ftsN'	152.398	102.145	159.052	243.315	113.294	136.338	23.0751	33.6615	34.6875	23.0197	27.3437	20.7084
'ftsX'	509.534	615.395	280.715	291.024	161.765	178.695	82.6859	68.1058	59.9682	88.9681	23.2712	23.7927
'fucA'	474.128	496.856	373.891	393.863	447.92	417.618	417.275	403.938	449.173	469.727	402.592	472.329
'fucI'	215.513	216.271	144.215	180.233	202.644	192.594	178.832	143.257	196.366	171.715	179.188	178.005
'fucK'	491.062	461.546	343.623	379.55	438.576	436.149	379.458	342.094	405.079	437.375	371.758	376.277
'fucO'	661.933	767.352	533.536	531.158	722.395	660.511	499.32	505.705	646.716	655.129	527.093	540.182
'fucP'	431.026	432.542	309.795	401.814	407.041	373.275	325.616	324.872	435.063	454.795	376.412	437.08
'fucR'	577.267	527.751	356.086	489.81	482.375	505.642	410.225	400.806	521.488	524.477	421.791	398.307
'fucU'	518.77	477.94	417.214	419.307	477.703	565.207	412.148	360.882	505.614	586.692	442.153	496.562
'fumA'	70.8114	77.5549	166.767	119.802	132.566	119.13	183.96	181.615	199.894	202.2	205.95	257.754
'fumB'	346.36	257.255	181.011	218.4	161.765	248.85	207.676	223.105	253.983	223.976	271.692	276.26
'fumC'	83.1264	101.515	258.756	122.453	177.533	182.666	237.161	259.115	303.956	278.103	314.162	313.711
'fur'	9.23627	6.9358	11.2761	17.4932	11.6798	9.26569	80.122	57.929	74.0783	95.1897	76.2133	88.5617
'fxsA'	307.876	244.645	197.034	255.507	178.701	146.265	203.83	200.403	236.345	217.754	282.745	248.061
'gabD'	0	0	0	0	0	0	0	0	0	0	0	0
'gabP'	181.647	159.523	140.654	160.089	179.285	189.947	153.193	189.444	209.301	199.712	216.422	174.92
'gabT'	409.475	521.446	452.823	390.152	578.149	504.318	391.636	423.508	469.751	456.662	536.984	497.884
'gadC'	200.119	273.649	424.336	257.627	471.279	512.26	472.399	452.473	582.632	561.184	492.186	496.562
'gadE'	380.226	254.733	212.465	189.245	241.772	207.816	146.143	169.873	191.075	167.36	165.807	144.078
'gadW'	543.4	457.132	353.712	375.309	323.53	280.618	264.723	239.544	315.127	287.436	194.897	194.307
'gadX'	324.809	317.155	227.302	297.915	189.213	224.362	156.398	166.742	185.784	181.669	188.497	143.637
'galE'	86.2052	68.7275	72.9977	57.2505	194.468	182.005	165.372	93.1562	152.86	164.871	212.35	237.486
'galF'	141.623	185.375	389.321	367.358	368.497	298.488	209.599	206.666	209.889	232.064	466.588	472.769
'galK'	61.5751	47.9201	70.0303	77.3943	94.6063	103.908	129.477	142.474	151.096	160.516	176.861	233.521
'galM'	26.1694	30.8958	42.1369	59.3709	57.8149	87.3622	70.5074	80.631	112.881	107.011	143.118	123.81
'galR'	472.589	450.827	335.908	358.876	525.59	509.613	467.912	453.256	488.564	471.593	513.13	523.88
'galS'	187.804	200.508	374.484	307.987	358.569	292.531	400.61	396.109	433.887	439.863	521.857	535.776
'galT'	160.095	187.897	268.845	250.206	358.569	300.473	324.334	328.786	336.88	377.648	438.663	454.264
'galU'	152.398	187.897	702.083	349.864	299.003	299.811	255.749	221.539	312.187	227.709	252.493	231.758
'gapA'	152.398	153.849	329.973	184.474	237.1	305.106	282.029	228.585	250.455	269.393	354.886	380.683
'garD'	252.458	333.549	280.121	244.375	231.26	211.787	212.163	184.747	181.668	205.933	223.404	222.506
'garK'	127.768	153.849	103.858	120.862	102.782	100.599	143.579	156.565	163.443	135.63	182.679	189.02
'garL'	138.544	205.552	175.669	144.717	127.894	142.956	124.99	118.989	118.761	146.829	209.441	155.974
'garP'	314.033	256.625	178.637	251.796	157.677	170.092	167.295	144.823	184.608	164.249	178.607	197.832
'garR'	227.828	221.315	224.334	163.8	165.853	158.84	180.114	157.348	198.13	197.223	234.458	229.996
'gatC'	130.847	121.061	187.539	174.932	227.172	240.246	166.654	147.171	175.201	153.05	219.331	292.121
'gatD'	209.355	225.729	354.899	311.167	388.937	455.342	329.462	321.741	363.337	311.7	485.787	502.731
'gatY'	335.584	382.1	682.499	579.927	690.859	743.902	623.67	624.694	619.671	670.061	806.93	790.446
'gatZ'	227.828	254.733	405.345	325.48	475.951	424.898	389.713	344.443	442.706	433.02	607.961	542.385
'gcd'	138.544	182.853	158.458	167.511	168.773	176.71	143.579	144.04	156.976	144.34	201.878	192.545
'gcl'	323.269	361.292	387.541	345.094	527.342	474.536	417.916	432.902	466.811	490.258	416.555	371.43
'gcvA'	253.997	290.673	458.164	435.74	183.373	193.256	182.037	225.454	163.443	167.36	197.224	205.763
'gcvH'	113.914	110.973	48.6651	52.4797	61.3189	65.5216	39.7405	64.9745	58.7923	39.8179	58.7598	49.7884
'gcvP'	118.532	86.3822	61.7216	66.2622	79.4226	76.111	71.1483	51.6664	52.3252	59.1047	54.1056	41.8575
'gcvR'	692.72	864.453	730.57	772.352	925.039	939.805	141.656	108.03	161.091	161.76	136.137	137.909
'gcvT'	130.847	130.519	101.485	86.936	67.1588	79.4202	53.842	57.929	52.9131	57.2382	58.7598	70.9375
'gdhA'	100.06	97.7317	223.147	136.235	161.181	166.121	143.579	168.307	183.432	179.803	229.803	211.05
'ggt'	400.238	329.766	284.869	344.563	267.467	230.98	219.855	233.282	258.686	237.041	223.404	238.367
'gidA'	47.7207	32.7874	38.576	37.6369	5.2559	6.61835	12.8195	4.69695	10.5826	3.11077	6.39959	12.3369
'gidB'	87.7445	54.8559	61.7216	55.6602	47.8871	43.6811	36.5356	40.7069	40.5667	49.7724	57.5963	77.9871
'glcB'	287.864	272.388	185.758	203.557	201.476	162.15	212.163	180.833	229.29	239.53	211.186	223.827
'glcC'	457.195	418.67	294.958	374.779	251.115	323.637	321.77	281.817	363.337	359.605	315.907	346.756
'glcD'	309.415	297.609	226.708	306.927	218.996	224.362	230.751	230.933	281.615	293.035	297.872	322.964
'glcE'	363.293	372.011	283.682	360.996	242.356	262.087	280.747	248.938	300.429	355.25	367.685	314.592
'glcF'	264.773	241.492	223.741	235.363	177.533	149.575	172.423	197.272	225.175	223.354	210.605	216.778
'glcG'	374.069	277.432	211.871	283.602	203.228	244.217	242.289	230.933	321.006	273.748	310.671	303.577
'gldA'	438.723	356.878	230.269	390.152	236.516	227.671	200.625	152.651	166.382	221.487	225.731	216.778
'glf'	81.587	82.5991	220.18	136.765	223.668	184.652	113.453	105.681	140.514	121.32	230.967	229.115
'glgA'	354.057	330.396	275.967	336.082	190.965	225.686	130.118	126.035	177.553	172.337	188.497	181.089
'glgB'	223.21	181.592	187.539	217.34	93.4383	105.232	101.915	87.6764	101.711	106.388	104.721	94.7301
'glgC'	203.198	197.355	181.011	205.678	152.421	148.913	122.426	105.681	151.096	100.789	128.574	138.35
'glgP'	126.229	130.519	121.069	128.814	101.614	117.145	86.5317	81.4138	102.887	93.9454	85.5217	99.1362
'glgS'	386.384	414.256	316.323	273.53	298.419	282.603	233.956	221.539	231.642	245.751	252.493	241.892
'glgX'	438.723	322.83	286.056	319.119	188.045	194.579	128.836	140.908	152.86	129.408	206.532	197.391
'glk'	401.778	460.285	475.375	439.981	549.534	516.231	398.687	328.786	370.98	416.844	534.075	490.394
'glmM'	23.0907	34.0485	13.65	42.4078	8.17585	10.5894	16.6654	18.005	18.2256	12.4431	14.5445	14.0994
'glnB'	113.914	158.893	201.782	196.136	150.669	150.898	210.24	182.398	242.812	214.021	275.182	313.27
'glnD'	284.785	310.85	155.491	172.812	207.9	215.758	4.48683	1.56565	0	1.24431	0.581781	1.32182
'glnE'	418.711	414.256	200.595	194.546	321.194	290.545	122.426	129.949	167.558	148.695	147.19	152.449
'glnG'	280.167	251.58	205.937	239.604	165.269	135.676	14.7424	9.3939	12.3464	6.22155	17.4534	20.7084
'glnH'	90.8233	90.7959	113.948	127.754	172.861	198.55	124.99	142.474	134.634	158.649	186.17	217.218
'glnK'	255.537	332.288	271.219	287.313	426.896	483.139	310.232	265.378	361.573	350.273	308.344	319.879
'glnL'	267.852	208.705	225.521	259.748	134.318	162.15	73.7122	60.2775	79.3697	67.8149	103.557	65.2096
'glnP'	144.702	208.705	183.978	177.053	267.467	256.792	200.625	199.62	242.224	262.549	316.489	272.735
'glnQ'	123.15	177.178	195.254	214.69	331.122	277.971	176.909	201.969	210.477	241.396	278.673	263.482
'gloA'	7.69689	8.82738	10.6826	4.24078	15.7677	17.8695	37.1766	30.5302	46.4459	36.7071	40.1429	35.689
'gloB'	36.9451	47.9201	33.8282	32.336	45.5512	66.1835	51.919	40.7069	54.0889	62.8376	75.6315	73.1405
'glpA'	66.1933	81.338	105.639	119.272	113.294	86.7004	168.577	167.525	166.382	158.027	189.66	204.881
'glpB'	64.6539	57.378	102.672	125.103	81.7585	98.6134	171.141	159.696	185.784	171.715	231.549	226.031
'glpC'	115.453	116.648	205.937	227.412	143.661	151.56	316.642	320.175	328.649	350.895	411.901	380.683
'glpD'	1991.96	1501.29	1493.19	1998.47	1368.87	1309.77	1361.43	1298.71	1469.81	1582.76	1531.83	1500.7
'glpE'	1385.44	1136.21	957.279	1260.04	661.66	709.487	360.869	411.766	433.887	408.134	436.335	453.383
'glpF'	249.379	162.046	123.443	165.39	79.4226	81.4057	108.966	94.7218	110.53	87.1017	109.957	114.998
'glpG'	1562.47	1072.53	1140.07	1330.01	774.37	808.1	411.507	424.291	434.475	456.039	357.213	399.188
'glpK'	1921.14	1792.59	1020.78	1518.73	831.017	891.492	569.828	544.846	539.714	597.891	619.015	660.908
'glpQ'	0	0	0	0	0	0	0	0	0	0	0	0
'glpR'	152.398	127.997	54.0064	62.0214	144.245	121.778	69.2254	82.9794	81.1334	82.7466	82.0311	81.512
'glpT'	146.241	151.957	255.789	242.785	188.045	221.053	236.52	257.549	301.017	278.103	363.031	382.445
'glpX'	406.396	426.867	301.486	415.066	235.932	296.502	201.266	213.711	214.004	263.171	264.71	241.011
'gltA'	36.9451	63.6833	26.7065	24.9146	80.0065	91.3332	213.445	220.757	160.503	182.291	258.311	255.992
'gltD'	743.52	735.825	604.16	740.016	417.552	469.241	319.847	339.746	344.523	375.159	352.559	333.098
'gltF'	686.563	628.636	535.91	610.142	407.041	448.724	216.009	234.847	243.988	227.087	322.888	319.879
'gltI'	160.095	157.632	352.525	387.501	238.852	246.203	228.187	253.635	305.132	309.211	346.741	325.167
'gltJ'	184.725	172.764	186.352	195.076	225.42	280.618	204.471	223.888	252.807	256.95	300.781	281.987
'gltK'	129.308	170.873	173.889	145.777	210.236	197.227	182.678	183.181	219.883	238.285	259.474	252.026
'gltL'	78.5083	123.583	94.9563	103.369	141.325	125.749	132.682	121.338	155.8	172.337	158.244	168.311
'gltP'	654.236	559.278	347.778	407.645	407.041	420.265	408.302	368.71	412.722	398.179	358.959	358.653
'gltS'	1152.99	975.426	706.238	764.931	739.915	809.424	464.708	479.089	505.614	522.61	489.277	525.642
'glvB'	714.271	622.961	443.921	662.622	426.896	487.11	271.774	283.383	305.72	304.234	311.253	301.815
'glvC'	755.835	608.459	491.399	631.876	433.32	487.772	277.543	253.635	299.253	267.527	315.907	315.033
'glvG'	1102.19	987.406	646.297	953.646	717.139	742.579	392.918	342.877	439.179	447.329	463.679	448.096
'glxK'	391.002	496.856	393.475	399.694	552.454	596.975	434.582	401.589	501.499	535.053	493.932	445.452
'glxR'	370.99	389.666	344.217	387.501	585.741	549.323	307.668	295.908	362.749	380.137	326.961	322.964
'glyA'	0	0	0	0	0	0	0	0	0	0	0	0
'gmd'	90.8233	93.318	120.476	119.272	192.132	182.666	146.783	155.782	164.619	128.164	257.147	272.294
'gmhB'	541.861	537.209	577.453	516.845	164.101	195.241	240.366	233.282	276.324	255.706	90.176	78.8683
'gmr'	209.355	225.098	351.932	245.435	331.706	322.314	233.956	191.009	222.235	231.442	265.874	253.348
'gnd'	20.0119	15.1327	51.039	29.6855	48.4711	54.2705	151.27	126.035	76.43	105.144	148.354	115.879
'gnsA'	0	0	0	0	0	0	0	0	0	0	0	0
'gntK'	277.088	215.64	179.23	197.726	138.989	146.265	157.68	113.51	206.949	209.666	193.733	181.97
'gntP'	198.58	245.906	167.361	166.451	196.804	170.092	136.528	157.348	136.986	202.2	179.77	146.722
'gntR'	106.217	76.2938	77.7455	98.0681	72.4147	99.2752	149.988	194.141	162.267	189.757	121.592	152.009
'gntT'	210.895	190.419	112.167	183.414	123.806	162.811	131.4	123.686	158.151	133.141	174.534	165.227
'gntU'	250.919	245.906	220.773	210.449	189.213	166.782	139.733	191.009	186.372	170.47	158.826	187.698
'gntX'	127.768	128.628	117.508	153.198	93.4383	89.3477	28.2029	38.3584	19.9894	34.8407	20.9441	20.7084
'gntY'	230.907	150.066	177.45	173.342	87.0144	82.7294	74.9942	89.242	73.4904	68.437	27.3437	28.1987
'gor'	286.324	177.809	132.939	160.089	89.3504	99.2752	556.367	563.634	653.183	671.305	493.932	552.96
'gph'	849.737	662.684	686.653	786.665	479.455	544.69	153.834	149.52	178.729	116.965	202.46	192.104
'gpmA'	3.07876	5.04422	3.56086	10.0719	5.2559	9.92752	64.7386	64.9745	94.6557	88.9681	72.7226	76.2247
'gpp'	1056.01	799.509	802.381	1190.6	405.289	438.796	383.304	292.776	320.418	300.501	313.58	317.236
'gpt'	157.017	199.247	99.7042	134.115	183.373	187.961	175.627	194.141	144.629	128.786	101.23	96.052
'greA'	18.4725	23.96	16.0239	16.9631	18.1037	17.8695	42.3044	29.7473	33.5116	37.9514	44.7971	45.3823
'greB'	103.138	91.4265	99.7042	93.8273	76.5026	72.14	57.6878	66.5401	101.711	71.5478	126.828	95.6114
'groL'	0	0	0	0	0	0	0	0	0	0	0	0
'grxA'	106.217	124.214	132.345	122.983	182.205	157.517	155.757	148.737	183.432	232.064	238.53	262.601
'grxB'	66.1933	102.776	158.458	133.585	129.062	148.251	133.964	140.126	134.047	131.897	191.988	168.311
'grxC'	370.99	350.573	272.406	307.987	259.291	254.145	270.492	252.852	295.138	273.748	227.476	255.551
'gshA'	290.942	278.063	198.815	234.833	174.613	200.536	253.826	234.847	339.82	322.898	202.46	222.065
'gshB'	244.761	252.841	165.58	243.845	166.437	185.314	432.659	365.579	467.987	495.235	495.095	478.057
'gsk'	507.995	488.028	363.208	437.861	550.118	538.072	402.533	364.796	455.053	503.323	398.52	444.13
'gspA'	349.439	293.826	287.243	329.721	183.373	260.763	154.475	149.52	170.498	137.496	225.149	221.184
'gspC'	61.5751	48.5506	49.2586	64.1418	50.2231	45.6666	47.4322	39.9241	42.9184	55.3718	56.4327	60.8035
'gspD'	78.5083	61.7917	63.502	81.635	65.4068	35.7391	71.7893	69.6714	68.787	73.4143	88.4307	72.2593
'gspE'	149.32	122.953	163.206	238.544	88.1824	97.2897	131.4	118.207	80.5455	138.741	127.992	119.404
'gspG'	118.532	72.5106	112.761	109.73	56.063	70.8163	87.1727	82.1966	92.8919	97.0562	121.01	122.488
'gspH'	158.556	93.9486	102.078	145.777	71.8307	74.7873	85.2498	95.5046	83.4851	98.3005	112.865	105.305
'gss'	492.601	453.98	290.804	308.517	311.266	295.178	303.182	299.822	332.765	359.605	349.068	383.767
'gst'	61.5751	78.8159	148.369	83.7554	128.478	111.85	152.552	125.252	161.679	180.425	207.696	215.456
'guaA'	20.0119	18.2853	75.9651	74.2137	8.17585	15.2222	0	0	0	0	0	0
'guaB'	184.725	168.981	224.334	267.169	123.222	104.57	0	0	0	0	0	0
'guaC'	330.966	419.301	343.03	420.898	417.552	430.854	228.187	214.494	333.94	279.348	342.087	398.748
'guaD'	980.584	799.509	563.803	603.781	574.062	646.613	501.243	517.447	584.984	606.601	583.526	537.979
'gudD'	444.88	417.409	256.976	361.527	391.857	371.289	294.849	307.65	406.255	396.935	339.178	361.737
'gudP'	487.983	462.177	354.306	389.092	442.664	463.284	408.302	449.341	469.751	460.395	408.992	430.912
'gudX'	507.995	508.836	373.891	463.835	513.911	499.023	375.612	412.549	485.037	498.968	472.988	426.947
'gutM'	124.69	105.929	97.9237	101.779	144.245	141.633	158.962	133.08	156.976	143.096	158.826	153.771
'gutQ'	138.544	168.351	94.3629	137.295	165.269	147.589	148.065	165.959	192.839	164.871	184.424	215.897
'hcaB'	67.7326	66.8359	70.0303	95.4176	88.1824	121.116	119.222	97.0703	139.926	137.496	143.118	175.802
'hcaC'	161.635	135.563	146.589	137.295	153.005	195.903	154.475	171.439	177.553	171.715	189.66	224.709
'hcaD'	147.78	143.13	166.174	196.666	252.867	217.082	191.011	146.388	194.603	218.376	266.456	214.575
'hcaE'	104.678	97.1012	102.078	142.066	143.077	163.473	114.735	128.383	158.151	143.096	189.079	174.039
'hcaF'	123.15	136.824	134.719	175.462	141.909	189.285	132.041	173.787	209.889	183.536	218.75	219.862
'hcaR'	229.367	211.227	150.743	135.705	160.013	172.077	201.266	180.833	205.185	204.689	228.058	219.421
'hcaT'	169.332	157.001	240.952	302.686	306.01	296.502	208.317	197.272	227.526	238.907	346.159	287.275
'hchA'	81.587	117.278	233.236	188.715	309.514	251.497	232.674	187.878	206.361	232.686	356.05	333.538
'hcp'	115.453	135.563	166.767	216.28	190.381	176.048	151.911	189.444	152.272	128.164	186.752	178.445
'hcr'	155.477	141.869	167.954	126.693	201.476	193.918	150.629	124.469	171.086	153.672	168.716	204
'hda'	1.53938	4.41369	2.37391	1.59029	4.67191	2.64734	2.5639	0.782825	0	0.622155	18.617	9.25271
'hdeA'	431.026	421.823	364.988	344.033	328.786	340.845	280.747	296.691	307.484	365.205	226.313	217.218
'hdeB'	460.274	442	336.502	309.047	333.458	309.077	230.751	250.504	271.033	293.035	247.257	198.272
'hdeD'	451.038	368.228	332.941	330.251	302.506	302.459	221.137	266.16	259.274	291.791	232.13	168.752
'hdfR'	529.546	449.566	407.125	441.041	187.461	182.005	77.5581	50.1008	45.858	51.0167	40.1429	70.4968
'hdhA'	96.9808	95.8402	228.489	180.763	231.844	193.256	271.133	232.499	256.923	274.37	335.106	315.914
'helD'	249.379	360.662	402.971	423.548	516.831	593.666	560.213	458.735	556.175	549.363	578.872	592.174
'hemF'	232.446	278.693	282.495	297.915	403.537	369.304	302.541	319.393	303.956	322.898	370.594	393.461
'hemG'	84.6658	46.0285	67.6564	50.3593	7.59186	9.26569	3.84586	2.34847	2.35169	0	0	1.76242
'hemN'	247.84	208.705	144.808	194.546	134.902	108.541	108.966	142.474	134.047	154.917	143.7	179.767
'hemX'	223.21	167.09	135.906	204.088	73.5827	91.3332	40.3815	43.8382	57.0286	41.0622	62.8323	71.3781
'hemY'	215.513	127.997	157.271	164.33	64.8228	67.5072	34.6127	46.9695	38.215	31.7299	59.3416	56.8381
'hepA'	789.701	803.292	358.46	477.618	404.705	363.347	213.445	212.146	253.983	235.175	344.996	304.458
'hflC'	175.489	143.76	151.93	160.089	85.2624	95.9661	141.015	142.474	139.338	160.516	189.079	172.717
'hflD'	118.532	212.488	280.715	236.424	313.018	328.27	697.382	729.593	172.262	282.458	25.0166	17.6242
'hflK'	263.234	193.572	178.043	225.822	184.541	136.338	157.039	163.61	214.592	195.979	246.675	213.253
'hflX'	178.568	136.824	134.719	126.163	83.5105	58.2415	96.1464	82.1966	118.761	121.32	147.19	167.871
'hfq'	1.53938	0	1.18695	0	0	0	3.20488	2.34847	2.35169	0.622155	2.32712	3.52484
'hha'	421.79	468.482	318.104	389.622	577.565	518.879	361.51	353.837	460.344	448.574	395.029	422.1
'hinT'	67.7326	106.559	166.767	137.825	136.654	164.797	156.398	175.353	142.277	152.428	263.547	258.195
'hipA'	72.3508	110.342	111.574	59.901	242.356	252.821	311.514	296.691	341.583	321.032	306.017	285.072
'hipB'	183.186	184.745	425.523	273.53	349.81	359.376	373.048	414.897	439.767	434.886	440.99	398.748
'hisA'	169.332	203.03	439.173	266.639	453.76	410.338	241.007	287.297	275.736	242.64	537.565	477.616
'hisB'	101.599	132.411	300.893	210.449	270.387	246.203	173.704	192.575	229.878	209.044	340.342	290.8
'hisC'	133.926	118.539	315.136	215.75	293.747	265.396	209.599	183.964	204.597	264.416	392.12	380.242
'hisD'	96.9808	141.238	249.854	182.884	283.819	299.811	226.265	242.676	270.445	230.819	425.863	385.089
'hisF'	129.308	160.784	283.682	181.823	327.618	298.488	164.731	169.09	211.064	189.757	404.919	383.767
'hisH'	120.071	144.391	340.656	230.592	355.066	284.589	210.881	201.186	246.928	209.044	466.588	412.407
'hisI'	96.9808	135.563	240.952	157.439	255.203	237.599	151.27	132.297	141.69	179.803	297.872	292.562
'hisJ'	86.2052	101.515	128.191	133.055	114.462	102.584	175.627	147.171	134.634	187.269	223.404	226.912
'hisL'	75.4295	103.406	167.954	138.886	196.22	213.773	180.755	179.267	215.768	195.979	255.983	246.298
'hisM'	86.2052	101.515	144.808	138.886	143.077	154.869	165.372	190.226	206.361	212.155	292.636	298.29
'hisP'	80.0477	96.4707	130.565	159.029	144.829	143.618	187.806	183.181	155.8	215.266	239.112	225.149
'hisQ'	60.0357	105.298	118.102	120.332	112.126	82.0675	149.988	140.126	170.498	159.272	200.133	214.575
'hlpA'	164.713	261.038	182.197	256.567	255.203	245.541	189.729	205.1	221.059	258.194	198.387	166.108
'hlyE'	200.119	201.769	289.617	254.447	307.178	292.531	225.624	241.11	226.35	210.288	353.723	384.208
'hmp'	183.186	217.532	179.824	214.159	250.531	234.29	224.342	153.434	231.642	203.445	241.439	253.789
'hns'	30.7876	42.8759	45.1043	30.7457	39.7113	40.3719	5.76878	7.82825	7.05508	2.48862	5.81781	7.49029
'hofB'	195.501	179.07	179.23	226.352	245.86	181.343	160.244	129.166	172.262	187.269	228.058	283.309
'hofC'	204.737	214.379	144.808	217.34	235.932	211.125	171.141	128.383	159.915	189.135	237.948	197.391
'hofQ'	514.152	433.803	346.591	446.342	309.514	277.971	246.135	248.938	271.033	265.038	371.176	358.653
'hokA'	665.011	714.387	467.066	512.604	436.24	525.497	319.847	335.832	358.045	406.267	324.052	342.791
'hokB'	110.835	160.154	301.486	198.787	275.643	291.207	287.798	295.125	386.266	365.205	337.433	350.281
'hokC'	350.978	320.938	244.513	321.239	230.092	274	191.652	140.908	215.18	199.712	235.621	241.892
'hokD'	147.78	142.499	370.33	162.21	264.547	223.038	228.828	299.822	326.885	316.055	342.087	296.087
'hokE'	397.16	413.626	358.46	350.925	603.261	591.019	307.668	284.948	396.26	398.801	367.685	385.53
'holC'	23.0907	30.2653	3.56086	9.01166	43.7992	44.3429	1.28195	0.782825	2.35169	0	1.16356	0.440605
'holD'	10.7756	16.3937	1.18695	6.89127	9.92782	11.913	0	0	1.76377	0	2.32712	1.32182
'holE'	301.718	317.786	669.442	452.703	588.661	514.246	541.625	555.806	619.671	606.601	845.327	864.908
'hpt'	89.2839	72.5106	86.0542	68.9127	78.8386	62.8743	23.0751	25.0504	22.3411	27.997	39.5611	34.3672
'hrpA'	116.993	143.13	240.952	177.053	287.323	340.845	266.005	302.17	340.408	311.077	326.379	355.128
'hrpB'	121.611	87.6433	91.9889	113.441	91.6863	84.053	86.5317	71.2371	85.8368	88.346	144.863	141.875
'hscA'	169.332	197.355	132.939	168.041	139.573	162.15	128.195	126.818	74.0783	102.033	70.9772	82.3932
'hscB'	152.398	148.174	166.174	129.874	132.566	133.691	117.94	109.595	85.2489	70.9256	69.2319	97.8144
'hscC'	90.8233	131.78	150.743	178.643	216.076	176.71	146.143	161.262	205.185	191.624	217.004	206.644
'hsdM'	124.69	116.648	81.8998	86.936	81.7585	84.7149	87.1727	72.8027	99.947	63.4598	93.0849	98.6956
'hsdR'	270.931	303.914	198.815	188.185	188.045	239.584	211.522	168.307	212.24	218.376	272.273	239.689
'hsdS'	255.537	281.846	157.271	195.606	172.277	191.27	198.703	179.267	241.636	212.155	201.878	244.095
'hslJ'	310.954	342.376	493.179	334.492	626.621	559.912	560.213	609.821	763.125	639.575	744.097	742.861
'hslO'	555.715	431.281	410.686	462.775	337.546	320.99	176.909	180.833	206.949	228.331	248.42	288.156
'hslR'	344.821	261.669	211.278	279.892	210.236	197.227	180.755	142.474	170.498	177.936	235.039	195.188
'hslU'	580.346	478.57	439.767	522.676	302.506	276.647	229.469	234.847	280.439	257.572	314.743	307.102
'hslV'	737.362	507.575	467.066	683.296	318.274	319.666	218.573	234.065	251.043	235.797	341.505	314.592
'hsrA'	337.124	150.696	303.86	392.802	83.5105	88.6859	105.12	135.429	119.936	113.854	165.226	160.821
'htgA'	463.353	431.281	283.682	456.414	354.482	350.111	223.06	218.408	271.033	267.527	340.342	237.927
'htpG'	440.262	586.39	390.508	570.385	662.828	598.961	410.225	339.746	480.333	490.88	459.607	438.843
'htpX'	411.014	449.566	934.726	637.177	697.867	745.226	701.228	646.613	783.114	744.097	929.685	970.653
'htrC'	414.093	322.199	300.893	401.284	200.308	238.922	167.295	136.994	150.508	172.337	162.317	151.128
'htrE'	155.477	192.941	190.506	197.726	211.404	213.773	157.039	131.515	183.432	165.493	230.385	236.605
'htrG'	298.639	283.107	132.345	181.293	256.371	248.85	191.011	187.878	206.949	222.109	228.64	238.367
'hupA'	187.804	233.926	163.8	221.051	209.652	225.686	160.244	147.954	137.574	138.118	127.41	123.369
'hupB'	434.105	525.86	626.712	617.034	583.405	593.004	423.685	436.816	411.546	464.127	322.306	352.044
'hyaA'	33.8663	50.4422	49.2586	54.6001	69.4947	52.285	71.7893	37.5756	68.787	60.349	72.1408	66.0908
'hyaB'	30.7876	55.4864	52.8195	46.1185	46.1352	75.4492	48.0732	63.4088	58.7923	71.5478	86.1035	83.2744
'hyaC'	23.0907	39.7232	62.3151	48.769	58.3989	52.285	48.7142	64.9745	62.3199	59.1047	83.1946	75.3435
'hyaD'	46.1813	48.5506	74.1846	65.7321	78.2546	87.3622	72.4303	79.0653	84.073	93.3232	121.01	84.5962
'hyaE'	56.957	67.4664	108.013	84.2855	98.6942	113.174	129.477	86.1107	134.047	107.633	131.482	137.909
'hyaF'	55.4176	112.864	149.556	165.921	170.525	205.169	198.703	140.908	156.976	195.357	237.366	222.506
'hybA'	337.124	295.717	213.652	262.398	240.604	259.439	224.983	210.58	249.279	280.592	249.584	237.927
'hybB'	218.592	262.299	142.435	200.907	202.644	154.869	220.496	191.792	253.983	248.862	242.603	221.624
'hybC'	477.207	395.971	320.478	323.89	299.587	315.695	264.723	281.817	305.132	311.7	310.671	330.454
'hybD'	280.167	286.89	157.271	218.4	206.732	217.744	230.11	183.181	258.098	274.37	297.29	304.899
'hybE'	394.081	380.208	252.228	248.086	287.323	272.014	255.749	254.418	296.901	258.194	287.981	304.458
'hybF'	435.644	371.381	221.367	312.758	282.067	299.811	298.054	286.514	301.017	277.481	354.886	359.975
'hybG'	203.198	192.311	129.378	155.319	138.405	114.497	164.09	144.823	218.707	173.581	200.133	193.866
'hybO'	243.222	187.897	109.793	173.872	147.749	155.531	128.836	140.908	144.041	164.871	164.062	169.633
'hycA'	157.017	203.03	141.841	183.414	205.564	215.758	189.729	181.615	228.702	202.2	222.24	247.62
'hycB'	221.67	211.227	161.426	211.509	233.012	246.203	227.546	236.413	273.972	238.285	266.456	258.635
'hycC'	329.427	334.81	252.228	307.987	304.842	327.608	269.21	258.332	323.946	382.003	343.251	412.847
'hycD'	0	0	0	0	0	0	0	0	0	0	0	0
'hycE'	183.186	287.52	172.702	212.569	248.779	258.777	207.676	202.752	222.235	276.237	236.203	269.65
'hycF'	198.58	206.813	144.215	146.837	163.517	197.889	191.652	178.484	225.175	238.907	219.331	220.303
'hycG'	220.131	226.99	141.248	179.703	229.508	242.232	221.137	230.15	285.143	251.973	247.839	236.605
'hycH'	96.9808	122.953	84.2737	83.7554	120.302	99.9371	107.043	92.3733	139.338	122.564	114.029	122.048
'hycI'	217.052	290.043	184.571	213.629	282.067	311.062	253.826	258.332	285.143	299.879	271.11	302.696
'hydN'	181.647	190.419	126.411	151.608	194.468	169.43	194.216	205.883	205.185	240.774	196.642	234.402
'hyfA'	355.596	394.08	404.751	463.835	448.504	472.55	340.999	329.569	415.662	385.114	494.514	456.908
'hyfB'	375.608	390.296	418.401	524.267	433.904	467.255	326.898	340.529	391.557	383.87	423.536	436.199
'hyfC'	230.907	316.525	329.973	397.043	349.81	467.255	302.541	315.478	374.507	350.273	406.665	450.739
'hyfD'	289.403	354.987	355.493	430.439	426.312	424.898	342.281	306.085	359.221	425.554	446.226	433.996
'hyfE'	352.518	478.57	450.449	499.882	533.182	571.825	415.993	404.72	436.239	490.258	515.458	589.53
'hyfF'	346.36	402.276	381.012	533.278	489.383	516.231	382.022	362.448	411.546	396.313	486.369	500.087
'hyfG'	400.238	419.301	455.197	499.352	525.006	639.994	425.608	380.453	457.992	417.466	522.439	578.515
'hyfH'	534.164	507.575	522.26	543.88	727.651	659.187	503.807	488.483	522.076	531.32	549.783	550.316
'hyfI'	84.6658	87.0128	108.013	91.1768	169.357	165.459	144.861	120.555	164.031	151.184	184.424	193.866
'hyfJ'	69.272	109.712	104.452	94.3574	114.462	111.85	135.246	133.863	168.146	153.05	190.242	196.069
'hyfR'	40.0238	39.0927	30.2673	42.9379	64.2388	53.6086	76.9171	60.2775	95.2436	81.5023	87.2671	93.4083
'hyi'	337.124	324.091	364.988	385.381	506.319	417.618	417.275	450.124	524.428	502.701	415.391	411.525
'hypA'	155.477	138.716	116.322	124.573	174.613	131.705	154.475	142.474	192.839	144.962	139.046	139.672
'hypB'	170.871	161.415	154.304	149.488	164.101	148.913	173.063	179.267	218.12	207.178	190.242	165.668
'hypC'	95.4414	143.76	71.8107	124.573	115.046	93.3187	153.834	136.212	174.025	179.181	147.772	132.622
'hypD'	266.312	241.492	159.645	219.991	262.211	230.319	187.806	206.666	283.379	262.549	193.733	198.713
'hypE'	252.458	255.364	173.295	206.738	245.276	249.512	234.597	268.509	273.384	265.038	246.093	275.819
'hypF'	220.131	232.034	143.621	165.39	233.012	246.864	185.883	210.58	294.55	265.038	226.894	243.655
'hyuA'	583.424	511.988	348.371	481.859	511.575	483.139	373.048	333.483	389.793	444.841	414.81	397.426
'iaaA'	101.599	120.431	169.734	135.705	223.668	242.893	122.426	142.474	161.679	172.337	175.698	188.579
'iadA'	272.47	295.087	172.108	187.124	161.181	136.338	100.633	91.5905	75.2542	94.5675	101.812	100.899
'iap'	169.332	138.716	128.785	144.187	185.125	182.005	148.706	150.302	145.805	161.138	151.845	179.326
'ibpA'	1142.22	937.594	737.692	1077.69	677.428	686.323	360.869	471.261	436.827	468.483	469.497	535.335
'ibpB'	986.741	778.071	608.314	799.917	602.093	639.332	333.948	300.605	362.749	350.273	338.596	348.519
'icd'	1.53938	11.3495	16.6174	14.8427	3.50394	1.9855	26.28	31.313	7.643	19.2868	20.9441	15.8618
'icdC'	170.871	174.656	306.234	180.233	254.619	262.087	217.932	214.494	254.571	238.907	378.157	333.538
'iclR'	267.852	176.548	197.034	189.775	130.23	140.309	84.6088	93.1562	98.7711	105.766	121.592	124.691
'idi'	798.937	923.092	665.881	726.764	735.827	696.25	511.499	473.609	614.968	584.203	540.474	615.966
'idnD'	329.427	288.782	245.106	237.484	275.059	281.942	246.776	263.029	196.954	240.152	254.238	236.605
'idnK'	357.136	306.436	192.88	239.074	265.131	238.922	205.112	192.575	239.285	230.819	253.656	251.145
'idnO'	257.076	201.138	146.589	209.389	162.349	189.947	139.733	122.121	169.91	154.917	173.371	189.46
'idnR'	415.632	325.983	254.602	293.144	304.842	244.217	242.93	187.095	327.473	292.413	278.673	304.458
'idnT'	417.171	349.943	262.317	261.338	256.371	211.125	225.624	177.701	241.049	222.109	275.764	261.279
'ihfA'	121.611	119.17	148.369	188.715	43.7992	21.1787	27.562	23.4847	18.2256	19.2868	34.3251	46.2636
'ihfB'	691.181	788.159	557.275	828.543	140.157	132.367	80.763	51.6664	71.1387	65.3263	150.099	122.929
'ileS'	0	0	0	0	0	0	0	0	0	0	0	0
'ilvA'	349.439	266.083	257.569	340.323	165.853	171.415	117.299	115.075	119.348	153.05	177.443	218.54
'ilvB'	1196.1	979.84	714.546	1029.45	694.363	688.308	370.484	384.367	477.394	425.554	452.044	453.823
'ilvD'	292.482	190.419	231.456	341.913	157.677	133.029	140.374	141.691	129.931	132.519	158.826	196.51
'ilvE'	243.222	201.769	237.391	361.527	88.1824	133.029	128.195	136.212	139.338	149.317	188.497	200.916
'ilvH'	354.057	407.321	303.267	390.152	381.345	386.512	137.169	179.267	223.411	221.487	268.201	304.018
'ilvI'	0	0	0	0	0	0	0	0	0	0	0	0
'ilvL'	289.403	244.014	248.667	321.769	141.325	144.942	148.065	118.989	129.931	133.141	204.205	169.192
'ilvM'	270.931	191.05	175.076	310.107	100.446	142.294	134.605	82.9794	125.816	95.8118	153.008	158.177
'ilvN'	1447.02	1124.86	767.959	1087.76	787.802	780.965	482.014	465.781	582.632	538.164	500.331	522.117
'ilvY'	230.907	188.528	169.734	265.579	91.1023	92.6569	76.2761	83.7623	104.062	101.411	116.356	111.033
'inaA'	78.5083	71.8801	174.482	152.138	122.638	113.836	289.08	248.938	275.736	251.351	306.598	323.845
'intA'	116.993	158.893	175.076	170.691	186.293	241.57	215.368	198.838	188.723	189.757	247.839	208.406
'intB'	257.076	252.211	151.337	148.427	176.365	180.681	143.579	130.732	171.674	192.868	193.151	173.158
'intD'	475.668	562.43	455.197	407.645	714.219	745.226	512.14	466.564	602.034	640.197	506.731	561.331
'intE'	141.623	204.291	318.104	230.592	283.819	275.985	230.11	233.282	202.834	214.643	328.706	368.787
'intF'	226.289	284.998	169.141	196.136	271.555	288.56	266.646	264.595	335.704	330.364	236.785	205.322
'intQ'	229.367	283.107	682.499	428.319	536.686	551.97	534.574	472.043	635.545	512.656	632.396	634.912
'intR'	304.797	288.782	578.64	382.73	488.215	410.999	515.345	588.684	558.527	461.639	606.797	567.94
'intS'	197.04	264.821	339.469	249.146	339.298	375.26	278.825	314.696	311.599	344.674	437.499	379.802
'iscA'	89.2839	116.648	83.0868	92.7671	91.6863	100.599	146.143	123.686	137.574	120.698	70.9772	70.0562
'iscR'	378.687	261.038	770.927	699.729	386.017	392.468	204.471	228.585	215.768	221.487	312.998	274.056
'iscS'	9.23627	10.0884	9.49563	14.3126	1.16798	9.26569	0	1.56565	0	0	1.16356	0
'iscU'	3.07876	0.630527	1.78043	1.0602	1.16798	1.32367	0	0.782825	3.52754	1.24431	0.581781	0.881211
'ispA'	0	0	0	0	0	0	0	0	0	0	0	0
'ispU'	0	0	0	0	0	0	0	0	0	0	0	0
'ivbL'	1243.82	958.402	711.579	938.273	669.836	704.854	441.632	441.513	505.026	508.3	492.768	449.858
'ivy'	160.095	218.162	110.387	93.8273	179.285	155.531	207.676	172.221	205.773	233.93	246.093	196.951
'katE'	80.0477	95.8402	181.604	130.934	178.701	180.019	170.5	155.782	178.141	200.956	274.6	241.892
'katG'	0	0	0	0	0	0	0	0	0	0	0	0
'kbaY'	250.919	220.685	172.108	187.124	145.413	175.386	139.092	90.8077	134.047	128.164	150.681	170.514
'kbaZ'	224.749	236.448	195.254	217.87	161.181	150.237	188.447	145.605	168.146	194.112	177.443	162.143
'kbl'	1959.63	1778.72	1134.73	1321.53	1069.28	1037.1	367.279	410.2	411.546	338.452	313.58	270.532
'kch'	201.659	199.877	289.617	204.618	295.499	324.961	167.295	172.221	175.201	190.379	290.89	223.387
'kdgK'	461.813	439.478	272.406	312.758	327.034	326.946	296.772	269.292	304.544	304.234	278.091	248.942
'kdgR'	223.21	236.448	392.288	297.385	365.577	418.28	425.608	382.019	437.415	457.906	563.745	589.53
'kdgT'	466.432	346.16	268.845	414.006	237.1	242.893	183.319	199.62	234.581	213.399	233.294	250.704
'kdpA'	60.0357	66.8359	81.8998	68.9127	105.702	99.2752	116.658	65.7573	98.1832	102.656	105.302	108.389
'kdpB'	75.4295	71.2496	94.9563	70.503	102.198	93.9805	82.0449	85.3279	106.414	99.5448	114.611	132.622
'kdpC'	87.7445	107.19	114.541	124.043	137.237	145.604	120.503	128.383	174.613	149.317	176.28	189.46
'kdpD'	129.308	124.214	286.649	253.387	185.125	173.401	113.453	118.989	139.926	166.115	127.41	112.354
'kdpE'	116.993	173.395	170.328	172.812	216.076	178.034	153.834	171.439	194.015	234.552	215.259	230.877
'kdpF'	120.071	112.864	112.167	127.754	135.486	173.401	124.99	144.04	130.519	133.141	203.623	208.406
'kdsC'	187.804	143.76	169.734	264.519	89.3504	88.6859	89.0957	82.1966	97.0074	87.7238	125.665	133.944
'kdsD'	152.398	85.1212	115.135	169.631	88.1824	99.9371	40.3815	46.9695	65.2595	72.17	93.0849	114.117
'kduD'	434.105	382.73	320.478	298.975	381.345	421.589	268.569	266.16	309.248	308.589	290.89	286.393
'kduI'	726.586	738.348	556.682	557.663	635.964	602.932	477.527	486.134	616.732	610.956	550.946	500.968
'kefB'	195.501	141.869	127.598	202.497	116.214	135.676	112.171	103.333	111.118	121.32	138.464	155.534
'kefC'	364.833	338.593	262.91	332.901	315.938	306.43	192.934	193.358	221.059	236.419	317.652	317.676
'kefF'	220.131	278.693	163.8	192.425	179.285	208.478	99.9922	103.333	128.755	125.053	180.934	192.545
'kefG'	198.58	218.793	223.741	215.75	121.47	130.381	112.812	116.641	128.167	118.832	194.897	161.702
'kgtP'	103.138	145.652	115.135	119.272	177.533	166.782	132.682	108.813	131.107	151.806	194.897	178.886
'kil'	72.3508	56.1169	124.037	70.503	31.5354	22.5024	76.2761	76.7168	120.524	86.4795	88.4307	96.4926
'kptA'	323.269	291.304	175.669	192.956	238.852	222.377	155.116	152.651	208.125	218.376	186.17	211.05
'ksgA'	26.1694	21.4379	23.1456	16.433	10.5118	23.8261	7.05074	7.82825	7.643	8.71017	19.7805	19.3866
'lacA'	409.475	568.736	258.163	375.839	631.876	555.279	424.326	483.003	569.698	510.167	471.242	443.249
'lar'	157.017	186.636	292.584	213.629	144.245	164.797	132.041	104.899	131.107	117.587	176.28	185.935
'ldcA'	7.69689	11.98	15.4304	9.01166	23.3596	23.1642	270.492	288.08	379.211	276.237	258.311	244.536
'ldcC'	344.821	407.321	287.836	388.562	383.681	419.603	303.823	272.423	388.029	348.407	342.669	414.61
'ldhA'	149.32	129.889	308.608	233.243	308.93	243.555	252.545	234.065	339.232	296.146	308.344	342.791
'lepA'	32.3269	36.5706	35.0151	43.9981	36.2073	50.2994	16.0244	19.5706	31.7479	24.264	19.1988	22.9115
'leuA'	369.451	343.637	354.899	363.117	252.867	275.985	255.749	201.186	282.791	275.615	318.816	361.737
'leuB'	398.699	366.967	356.086	376.369	360.321	386.512	207.035	173.787	255.747	240.774	367.685	305.339
'leuC'	366.372	397.863	333.534	375.839	400.617	384.526	211.522	169.09	228.114	239.53	376.412	312.389
'leuD'	324.809	396.602	283.089	356.756	356.234	345.478	153.834	157.348	223.999	214.643	291.472	240.13
'leuL'	0	0	0	0	0	0	0	0	0	0	0	0
'leuO'	204.737	245.906	182.197	234.303	251.115	217.744	131.4	122.903	168.146	130.653	172.789	170.074
'lhr'	66.1933	59.9001	156.084	95.4176	97.5262	105.894	166.654	165.176	155.8	191.624	199.551	225.149
'ligB'	960.572	717.54	545.999	640.358	515.663	557.927	291.003	264.595	357.457	379.514	293.799	310.186
'ligT'	321.73	301.392	324.038	408.175	355.65	410.999	246.135	237.196	243.988	271.882	349.068	305.78
'lipA'	175.489	145.652	43.3238	76.3341	21.0236	25.8116	0.640976	6.2626	1.17585	1.24431	1.16356	0
'lipB'	1282.3	1045.41	1911	1676.17	226.588	248.85	26.921	20.3534	10.5826	23.0197	22.6894	33.0454
'lit'	157.017	182.222	344.217	225.291	304.842	243.555	207.676	242.676	235.169	260.061	412.482	394.782
'livF'	480.286	438.847	351.932	329.721	315.354	338.198	251.263	237.979	273.384	317.299	237.366	255.551
'livG'	418.711	383.361	372.704	383.261	318.858	313.71	282.67	224.671	286.319	320.41	278.673	274.056
'livH'	363.293	312.111	235.61	295.264	224.836	238.261	180.755	187.095	199.306	207.8	162.899	185.054
'livJ'	309.415	184.745	170.921	188.185	161.765	158.84	141.656	156.565	164.031	181.047	137.3	149.806
'livK'	334.045	232.034	208.904	267.699	155.341	165.459	158.321	161.262	195.191	202.2	186.752	163.024
'livM'	246.3	208.074	170.328	205.148	212.572	182.005	178.191	145.605	151.096	194.734	173.952	186.817
'lldD'	675.787	589.543	400.004	521.086	440.912	476.521	319.206	284.165	309.836	350.895	297.29	285.953
'lldP'	489.522	385.252	234.423	307.457	277.395	221.715	219.855	217.625	222.235	210.91	191.406	211.491
'lldR'	926.706	773.027	556.682	660.502	515.663	508.289	367.92	434.468	423.305	407.511	386.302	376.277
'lon'	120.071	180.961	105.045	139.946	200.308	205.169	120.503	155.782	245.164	240.774	183.261	170.074
'lpcA'	193.962	151.957	317.51	315.938	245.86	195.241	249.981	223.888	238.697	187.891	68.0683	67.8532
'lpd'	0	0	0	0	0	0	0	0	0	0	0	0
'lplA'	284.785	189.789	152.524	171.222	175.781	172.739	116.017	122.121	125.816	154.294	162.317	177.123
'lpp'	103.138	99.6233	261.13	184.474	146.581	175.386	110.889	87.6764	108.766	71.5478	146.027	137.469
'lpxA'	237.064	244.014	343.03	395.983	304.258	309.739	257.672	233.282	248.692	253.839	282.745	305.78
'lrp'	106.217	90.7959	112.761	98.5982	129.646	142.294	10.8966	5.47977	5.87923	6.22155	17.4534	17.1836
'lsrB'	0	0	0	0	0	0	0	0	0	0	0	0
'lsrC'	83.1264	115.387	188.726	104.959	162.933	167.444	149.347	196.489	181.668	179.803	169.298	176.242
'lsrD'	118.532	149.435	341.249	193.486	248.195	262.748	278.825	246.59	294.55	302.989	306.017	312.389
'lsrF'	143.162	193.572	366.769	232.183	316.522	315.033	365.997	370.276	450.937	395.068	435.172	422.54
'lsrG'	187.804	206.813	356.68	209.919	321.194	379.231	310.232	349.923	487.388	388.847	459.025	431.793
'ltaE'	127.768	146.913	191.1	186.064	217.244	197.227	117.299	138.56	187.548	176.692	190.242	223.827
'luxS'	147.78	143.76	106.826	131.994	152.421	166.121	133.964	158.131	181.668	168.604	159.408	185.935
'lysA'	400.238	428.759	295.552	301.626	436.24	404.381	310.873	295.125	316.303	342.807	371.758	323.845
'lysC'	253.997	263.56	230.863	287.313	221.916	223.038	203.189	158.131	206.949	210.288	214.677	207.966
'lysP'	253.997	312.111	318.104	325.48	332.29	359.376	433.3	476.74	548.532	475.326	542.22	593.936
'lysR'	663.472	619.808	490.806	466.486	556.542	578.444	395.482	446.993	505.614	518.255	511.967	467.042
'lysS'	121.611	159.523	147.182	130.934	62.4869	76.7728	23.7161	24.2676	27.0445	40.4401	11.0538	14.54
'lysU'	578.806	601.523	405.938	546.531	372.001	371.951	387.149	356.968	429.772	494.613	447.389	422.1
'lyxK'	1046.78	766.091	483.684	689.127	530.846	508.951	354.46	350.706	434.475	391.958	368.267	373.193
'maa'	326.348	544.776	417.808	447.402	599.757	681.028	467.912	385.933	582.044	512.656	469.497	471.448
'macA'	0	0	0	0	0	0	0	0	0	0	0	0
'macB'	135.465	174.026	240.952	209.919	279.147	226.348	194.216	175.353	184.608	156.161	226.894	264.804
'maeB'	230.907	269.866	238.578	283.602	336.378	330.256	244.212	238.762	253.983	252.595	253.075	267.007
'mak'	506.455	559.278	408.312	490.34	723.563	737.284	533.292	505.705	646.716	633.354	503.24	593.495
'malE'	751.216	675.925	518.699	682.766	470.695	493.067	332.026	312.347	410.958	388.847	367.104	413.288
'malG'	726.586	611.612	455.197	525.857	439.16	386.512	291.644	249.721	298.077	375.159	312.416	313.27
'malI'	112.375	121.692	187.539	136.765	165.853	157.517	208.317	252.07	264.566	294.901	317.652	317.676
'malK'	689.641	527.121	502.675	611.733	315.354	330.256	331.385	299.822	363.925	364.583	380.485	314.592
'malM'	632.684	471.004	423.743	458.534	361.489	352.096	298.054	275.554	353.93	316.677	342.087	292.121
'malP'	281.706	173.395	190.506	196.136	132.566	150.237	145.502	141.691	167.558	179.181	161.153	177.564
'malQ'	163.174	145.021	112.761	127.223	116.214	118.468	139.092	100.984	140.514	146.829	121.01	128.657
'malS'	800.477	684.753	439.173	585.228	502.231	476.521	379.458	360.099	451.525	460.395	353.141	392.579
'malT'	358.675	277.432	245.7	288.373	197.972	250.174	205.753	163.61	211.652	189.135	213.513	250.264
'malX'	41.5632	51.0727	124.037	95.4176	128.478	109.865	162.808	141.691	188.723	144.962	201.296	206.644
'malY'	89.2839	66.8359	154.304	124.043	109.79	127.072	169.859	169.09	206.949	209.044	258.311	237.046
'malZ'	329.427	398.493	318.697	350.395	461.352	454.681	385.227	422.725	514.433	487.147	449.135	515.949
'manA'	217.052	230.773	433.238	320.179	462.52	486.449	603.799	560.503	727.261	679.393	817.402	797.936
'manX'	163.174	191.05	410.093	330.781	322.946	318.343	361.51	345.226	370.392	345.918	525.348	555.603
'manY'	177.028	235.817	491.399	338.732	353.314	358.714	432.659	400.023	415.662	492.124	676.029	710.256
'manZ'	304.797	308.958	582.795	425.138	500.479	499.685	507.012	501.008	580.28	531.32	720.244	712.899
'maoC'	184.725	222.576	417.808	341.913	341.634	334.888	397.405	364.796	551.472	478.437	460.188	488.191
'marA'	183.186	213.749	351.338	204.618	283.235	293.855	339.076	365.579	396.848	383.87	453.207	384.648
'marC'	110.835	164.568	301.486	185.534	299.003	260.763	283.311	266.16	336.88	306.1	370.594	344.553
'marR'	189.344	213.118	417.808	291.024	432.736	426.222	372.407	414.114	466.811	427.42	503.24	513.305
'mazG'	406.396	349.312	274.186	315.938	409.961	376.584	260.877	295.125	305.72	360.85	286.818	297.849
'mbhA'	190.883	243.384	139.467	203.027	267.467	250.835	199.344	190.226	245.752	213.399	220.495	244.095
'mcrA'	130.847	160.784	266.471	180.233	217.244	245.541	228.828	254.418	228.702	207.178	354.304	337.504
'mcrB'	306.336	352.465	192.287	210.449	227.756	225.686	180.755	190.226	201.07	244.507	197.805	227.793
'mcrC'	303.257	414.256	211.871	179.703	266.299	227.671	217.291	191.792	222.823	272.504	246.093	261.279
'mdaB'	444.88	446.413	293.178	335.022	290.243	373.275	261.518	269.292	305.132	284.947	342.669	341.91
'mdh'	81.587	89.5349	52.226	56.1903	73.5827	71.4782	145.502	147.954	182.844	171.093	186.752	200.916
'mdlA'	427.947	474.157	416.621	476.028	717.139	716.767	472.399	431.336	495.031	531.32	512.549	503.171
'mdlB'	317.112	368.859	296.739	341.383	510.991	496.376	321.77	288.862	389.793	339.697	332.197	339.266
'mdoB'	289.403	287.52	194.66	213.629	217.828	182.005	168.577	158.913	199.894	214.643	173.371	178.886
'mdoC'	118.532	109.712	198.221	140.476	207.316	191.932	151.911	151.085	155.8	148.073	215.841	181.089
'mdoD'	89.2839	131.15	280.121	173.872	271.555	273.338	281.388	248.155	341.583	291.168	279.836	261.279
'mdoG'	69.272	85.7517	101.485	57.7806	150.669	158.84	126.913	190.226	138.75	179.181	179.77	169.192
'mdoH'	72.3508	61.7917	93.7694	47.7088	129.646	178.695	154.475	145.605	111.118	142.473	158.826	130.419
'mdtA'	175.489	246.536	413.06	403.934	395.945	392.468	345.486	313.913	329.237	304.234	584.108	560.891
'mdtB'	164.713	172.134	252.821	233.773	241.772	241.57	185.883	216.06	227.526	194.112	334.524	360.415
'mdtC'	177.028	245.275	407.719	359.406	405.873	405.705	349.973	245.807	331.589	324.143	536.402	537.979
'mdtD'	160.095	162.676	261.13	251.796	338.13	317.019	197.421	233.282	305.72	246.995	364.195	375.836
'mdtE'	509.534	431.281	315.136	375.839	293.747	338.198	295.49	276.337	322.182	372.671	300.199	265.685
'mdtF'	581.885	569.997	398.223	379.55	362.073	370.628	341.64	392.195	389.205	400.046	374.085	345.875
'mdtG'	78.5083	134.302	195.847	122.453	212.572	202.521	112.812	131.515	159.915	143.096	212.932	209.288
'mdtH'	40.0238	64.9443	104.452	86.4059	99.2782	129.058	99.9922	103.333	122.288	106.388	157.081	153.331
'mdtI'	58.4964	91.4265	182.197	127.223	157.677	186.637	206.394	204.317	235.757	205.933	263.547	258.635
'mdtJ'	67.7326	78.1854	176.856	113.971	143.077	147.589	211.522	233.282	243.4	186.646	278.091	270.091
'mdtK'	46.1813	73.7717	162.019	83.7554	121.47	134.352	203.83	195.706	196.366	181.047	200.133	194.307
'melA'	270.931	211.857	182.197	184.474	158.261	144.942	185.883	215.277	182.256	197.223	172.207	276.26
'melB'	298.639	230.773	175.076	236.424	165.853	221.053	173.704	187.878	214.004	202.2	219.331	226.471
'melR'	298.639	234.556	161.426	197.726	145.997	133.691	149.347	179.267	207.537	213.399	205.95	189.02
'menA'	309.415	324.722	176.856	282.542	185.709	215.096	139.733	155.782	168.734	150.561	150.099	151.568
'menB'	58.4964	58.0085	70.0303	75.804	51.9751	42.3574	100.633	78.2825	80.5455	87.1017	112.865	118.963
'menD'	66.1933	93.318	156.678	145.247	103.366	130.381	226.905	202.752	189.899	215.266	260.056	289.037
'menE'	73.8901	93.318	126.411	148.957	122.054	111.188	223.701	182.398	230.466	192.868	248.42	256.873
'menF'	118.532	93.318	198.221	167.511	152.421	129.058	207.676	213.711	196.954	175.448	286.818	282.428
'mepA'	101.599	153.218	198.815	191.365	210.82	202.521	246.135	198.055	238.109	231.442	299.035	327.81
'metA'	321.73	311.481	239.171	281.482	227.172	211.125	237.802	219.974	238.109	258.816	224.567	231.318
'metB'	261.694	247.167	238.578	292.614	148.333	185.314	178.832	164.393	166.382	147.451	210.023	197.832
'metC'	120.071	124.214	62.3151	77.9243	77.6706	66.8453	128.195	140.908	144.041	145.584	132.646	177.564
'metE'	138.544	133.041	87.8346	127.223	63.0708	60.227	136.528	86.8936	129.343	121.942	173.952	139.231
'metF'	96.9808	83.8601	78.339	81.1049	56.063	31.7681	174.345	136.212	140.514	110.744	179.188	153.331
'metH'	130.847	131.78	106.232	121.922	101.03	109.865	77.5581	74.3684	89.3643	103.9	68.0683	86.7992
'metI'	615.751	766.721	615.436	696.018	627.205	788.907	158.321	174.57	198.718	160.516	230.385	182.411
'metJ'	143.162	102.145	72.4042	60.4311	57.8149	64.198	3.20488	11.7424	2.35169	3.11077	8.72671	7.9309
'metL'	628.066	709.974	283.089	544.94	349.226	309.077	183.319	215.277	135.222	113.232	364.776	403.154
'metN'	754.295	923.723	699.709	781.364	1019.65	976.868	132.041	111.944	182.256	158.649	189.079	178.445
'metQ'	0	0	0	0	0	0	0	0	0	0	0	0
'metR'	90.8233	80.077	77.7455	110.79	58.3989	50.9613	87.8137	105.681	98.7711	101.411	127.41	143.637
'mfd'	104.678	131.78	158.458	160.089	190.965	179.357	187.806	186.312	159.915	133.141	257.729	238.367
'mglA'	163.174	174.026	225.521	189.245	227.172	234.951	294.208	289.645	342.759	307.967	380.485	382.886
'mglB'	206.277	204.291	325.225	298.975	279.731	344.816	417.275	377.322	396.848	406.889	514.876	504.493
'mglC'	116.993	172.134	247.48	224.231	275.643	225.024	329.462	295.125	371.568	344.674	395.611	480.7
'mgsA'	86.2052	113.495	137.093	132.524	181.037	192.594	124.99	148.737	167.558	184.78	189.079	206.644
'mgtA'	24.63	28.3737	18.3978	22.7942	24.5276	9.92752	15.3834	17.2221	17.6377	13.6874	13.9627	19.3866
'mhpA'	249.379	215.64	129.971	172.812	252.867	246.203	207.035	179.267	257.51	229.575	215.259	234.843
'mhpB'	420.25	457.763	313.949	368.948	494.055	482.478	374.971	374.973	430.948	436.131	461.352	463.517
'mhpC'	324.809	337.332	261.723	285.193	487.047	418.28	305.105	330.352	356.869	365.205	322.306	343.672
'mhpD'	424.868	465.96	312.762	328.13	514.495	538.072	407.661	340.529	473.278	518.877	501.495	459.111
'mhpE'	443.341	554.234	363.801	428.319	639.468	661.173	451.247	471.261	602.034	519.499	432.845	527.845
'mhpF'	369.451	413.626	249.26	287.313	439.16	469.903	312.796	302.17	393.321	403.156	381.648	382.005
'mhpR'	478.747	559.278	323.445	399.164	702.539	633.376	442.273	446.21	567.346	537.542	467.17	475.854
'mhpT'	372.529	485.506	299.706	303.746	543.694	528.144	382.022	352.271	456.816	446.707	391.538	420.337
'miaA'	0	0	0	0	0	0	0	0	0	0	0	0
'miaB'	104.678	92.6875	116.322	110.26	156.509	142.956	102.556	82.1966	130.519	135.008	163.48	185.495
'minC'	41.5632	64.9443	93.1759	55.1302	146.581	132.367	76.2761	62.626	59.3803	42.9287	118.101	102.661
'minD'	55.4176	69.9885	98.5172	78.9845	172.861	146.265	60.8927	74.3684	72.3146	92.0789	147.19	146.281
'minE'	40.0238	61.1612	72.9977	70.503	110.374	108.541	96.1464	106.464	106.414	111.988	204.787	224.709
'mioC'	286.324	181.592	162.019	258.158	134.902	131.043	98.7103	127.6	84.661	90.2124	144.282	132.622
'mipA'	75.4295	88.2738	141.248	122.453	151.253	144.942	189.088	123.686	145.217	146.206	238.53	214.134
'mlrA'	90.8233	97.1012	143.621	106.02	160.013	160.164	188.447	212.146	256.923	237.041	299.617	317.236
'mltB'	87.7445	94.5791	73.5912	78.4544	141.909	107.217	112.812	92.3733	109.354	105.766	114.611	125.132
'mltC'	500.298	653.226	303.267	318.059	197.388	193.918	194.857	228.585	210.477	255.706	287.4	267.447
'mltD'	84.6658	127.997	75.3716	99.6584	123.806	144.942	148.065	141.691	181.668	175.448	158.244	148.925
'mmuM'	87.7445	116.017	64.689	64.6719	111.542	105.232	105.12	137.777	115.233	145.584	94.2485	103.983
'mmuP'	192.422	265.452	119.289	154.789	216.076	262.087	180.114	178.484	265.153	228.953	151.845	178.886
'mngA'	89.2839	117.909	151.337	128.284	164.685	136.338	174.345	127.6	206.361	191.624	237.366	213.694
'mngB'	69.272	93.9486	97.3302	100.188	135.486	129.058	115.376	141.691	178.729	142.473	201.878	193.866
'mngR'	63.1145	88.9044	121.663	97.538	132.566	141.633	122.426	116.641	141.69	142.473	202.46	178.005
'mntH'	81.587	85.1212	119.289	157.969	102.782	151.56	480.732	452.473	421.541	395.068	342.669	375.396
'mntR'	227.828	229.512	252.821	287.313	426.896	394.454	346.127	323.307	358.045	367.693	456.698	444.571
'moaA'	67.7326	63.6833	144.215	105.489	72.4147	78.0965	151.27	119.772	114.645	136.252	156.499	164.346
'moaB'	109.296	131.15	147.182	147.897	162.349	152.884	176.268	165.176	208.713	222.731	235.039	223.387
'moaC'	113.914	126.736	173.295	155.849	102.782	107.217	128.836	131.515	165.794	192.868	194.897	207.084
'moaD'	76.9689	92.057	137.687	134.115	87.5984	84.7149	121.785	115.858	138.75	162.382	172.789	198.272
'moaE'	55.4176	69.9885	102.078	112.911	81.7585	66.8453	113.453	123.686	110.53	119.454	198.969	155.974
'mobB'	289.403	346.16	242.139	348.274	206.148	256.13	161.526	151.085	148.745	162.382	200.133	242.333
'modA'	56.957	85.7517	98.5172	84.2855	103.95	64.8598	94.2235	111.161	142.277	126.297	131.482	143.197
'modB'	127.768	111.603	216.026	168.571	154.757	128.396	186.524	207.449	186.372	244.507	230.385	222.946
'modC'	137.005	162.046	225.521	195.076	153.005	171.415	207.676	222.322	245.164	233.308	260.638	280.666
'modE'	93.9021	124.844	175.076	168.571	147.165	180.681	162.167	161.262	210.477	186.024	219.913	204
'modF'	80.0477	83.8601	87.2411	95.9477	143.661	159.502	135.246	116.641	144.629	153.672	207.114	177.564
'moeA'	86.2052	81.338	124.037	100.188	99.8622	71.4782	92.3005	75.934	94.0677	98.3005	111.12	103.542
'moeB'	86.2052	73.1412	151.337	114.501	117.966	87.3622	89.0957	96.2875	123.464	100.167	140.209	144.078
'mog'	294.021	264.191	321.071	320.709	155.341	229.657	168.577	149.52	188.135	233.93	204.205	229.555
'motA'	104.678	97.1012	194.067	136.765	174.029	197.889	204.471	174.57	201.658	185.402	275.182	253.348
'motB'	38.4845	61.1612	138.874	113.971	109.206	117.807	149.347	124.469	171.674	136.874	192.569	227.352
'mpaA'	286.324	318.416	553.714	402.344	505.735	532.115	494.833	454.821	583.808	508.3	574.799	640.2
'mpl'	275.549	273.649	247.48	248.086	222.5	237.599	182.678	175.353	260.45	266.904	220.495	252.907
'mppA'	146.241	165.198	319.884	218.4	267.467	256.792	237.802	268.509	303.956	276.237	353.141	344.994
'mprA'	400.238	409.843	413.654	381.14	474.783	475.859	375.612	421.943	367.452	428.043	387.466	359.534
'mqo'	0	0	0	0	0	0	0	0	0	0	0	0
'mraW'	132.387	181.592	39.1695	45.5884	91.6863	76.111	43.5864	34.4443	64.0836	57.8604	92.5031	82.8338
'mraZ'	418.711	334.81	395.849	432.56	287.323	262.087	103.197	118.207	174.025	132.519	187.333	200.916
'mrcA'	760.453	658.271	554.901	759.63	352.73	442.106	271.133	255.984	325.122	360.85	281	299.612
'mrcB'	246.3	283.737	189.319	253.917	291.995	339.521	39.7405	51.6664	41.7426	57.2382	48.8696	42.2981
'mreD'	0	0	0	0	0	0	0	0	0	0	0	0
'mrp'	0	0	0	0	0	0	0	0	0	0	0	0
'mrr'	260.155	341.746	180.417	217.87	182.789	195.903	207.035	187.095	195.191	233.308	236.785	235.283
'mscL'	574.188	503.161	446.295	538.049	370.833	357.391	229.469	200.403	210.477	232.686	275.764	281.106
'msrA'	201.659	196.094	127.598	160.089	113.878	155.531	183.319	177.701	198.718	219.621	225.731	209.288
'msyB'	106.217	85.7517	167.954	176.523	163.517	152.884	111.53	113.51	115.821	115.721	173.952	178.886
'mtgA'	297.1	244.014	179.23	240.134	162.349	164.135	79.481	83.7623	95.8315	87.7238	121.592	136.588
'mtlA'	855.894	756.633	497.334	523.206	466.023	440.12	377.535	334.266	353.93	342.807	324.634	349.841
'mtlD'	1174.55	1063.07	715.733	836.494	733.491	802.806	458.298	506.488	496.795	471.593	513.712	504.052
'mtlR'	838.961	634.311	505.049	573.566	391.273	427.545	374.971	400.806	370.98	410	419.464	406.679
'mtr'	207.816	211.857	150.15	170.161	138.405	152.884	73.0713	61.8432	84.661	70.9256	102.975	108.83
'murP'	183.186	204.291	220.773	241.725	286.739	287.898	217.932	180.833	222.235	236.419	278.091	300.493
'mutH'	4.61813	5.04422	1.78043	4.77088	7.59186	7.94202	1.92293	2.34847	2.35169	0	4.65424	2.20303
'mutL'	0	0	0	0	0	0	0	0	0	0	0	0
'mutM'	1015.99	947.052	680.718	702.909	645.308	650.584	373.048	424.291	348.051	425.554	420.627	379.361
'mutS'	0	0	0	0	0	0	0	0	0	0	0	0
'mutT'	0	0	0	0	0	0	0	0	0	0	0	0
'mutY'	349.439	245.275	186.945	203.557	128.478	107.879	160.244	141.691	157.563	146.206	141.373	170.074
'mviM'	138.544	174.026	273.593	253.387	317.69	338.198	194.857	232.499	265.153	253.217	361.286	403.154
'nac'	83.1264	114.756	251.041	163.8	247.611	241.57	99.3513	160.479	157.563	166.737	319.398	291.681
'nadA'	12.315	10.0884	9.49563	16.433	20.4396	18.5314	8.97366	10.9595	4.11546	3.73293	0.581781	0
'nadB'	141.623	204.291	174.482	177.583	217.244	278.632	58.3288	47.7523	39.9788	43.5508	1.74534	3.52484
'nadC'	133.926	131.78	93.1759	129.874	162.349	148.251	16.6654	37.5756	15.286	14.3096	3.49068	0.881211
'nadR'	92.3627	107.82	51.6325	56.1903	72.9987	54.2705	76.9171	66.5401	71.1387	81.5023	147.19	115.439
'nagA'	213.974	276.171	290.21	296.325	140.157	164.135	476.245	442.296	433.3	493.369	549.201	511.102
'nagB'	166.253	139.977	172.702	165.39	277.395	268.705	149.347	148.737	182.256	199.09	237.366	235.724
'nagC'	0	0	0	0	0	0	0	0	0	0	0	0
'nagD'	480.286	478.57	350.745	360.996	147.749	173.401	151.911	122.121	172.849	170.47	184.424	157.737
'nagE'	137.005	170.873	179.824	182.354	210.236	172.739	209.599	194.923	197.542	215.888	276.346	265.685
'nagZ'	49.2601	67.4664	96.1433	128.284	115.046	97.2897	91.0186	64.9745	92.304	82.7466	135.555	142.316
'nanA'	644.999	514.51	458.758	591.059	423.392	448.062	273.697	276.337	309.248	295.524	361.286	400.07
'nanE'	452.577	535.948	414.84	506.773	297.251	338.198	210.24	196.489	191.075	245.751	269.946	256.432
'nanR'	626.527	602.784	531.755	689.127	378.425	457.99	288.439	239.544	282.203	248.24	344.996	384.208
'nanT'	230.907	294.456	257.569	288.373	190.381	256.792	142.938	119.772	137.574	138.741	212.35	184.173
'napA'	81.587	109.081	185.758	187.124	130.23	138.985	214.727	213.711	232.818	249.484	297.872	306.661
'napB'	137.005	140.608	195.254	226.352	174.029	187.299	251.904	266.943	289.846	278.725	338.015	352.484
'napC'	95.4414	66.2054	128.785	113.441	104.534	91.995	180.755	176.136	228.114	176.07	242.603	249.823
'napD'	78.5083	80.7075	116.915	138.355	109.206	121.778	159.603	168.307	185.784	161.76	221.077	258.635
'napF'	53.8782	64.9443	80.1194	97.0079	78.2546	74.1255	125.631	102.55	121.7	118.832	157.663	193.866
'napG'	61.5751	69.9885	137.687	111.851	95.1903	91.3332	168.577	179.267	162.855	173.581	193.733	219.421
'napH'	103.138	98.9928	170.328	184.474	154.173	170.092	207.035	248.155	249.279	222.109	268.201	310.627
'narG'	140.083	175.917	229.676	219.991	182.789	171.415	132.682	161.262	158.739	154.294	263.547	241.011
'narH'	132.387	139.977	261.723	179.703	181.037	157.517	162.808	124.469	194.015	133.763	236.203	232.64
'narJ'	137.005	133.041	242.139	158.499	167.021	193.918	157.68	150.302	142.865	171.093	272.855	236.605
'narK'	135.465	182.853	302.673	231.123	243.524	237.599	171.141	197.272	210.477	206.555	324.634	336.622
'narL'	121.611	153.218	237.391	212.569	204.396	227.671	172.423	156.565	170.498	147.451	275.182	236.164
'narQ'	306.336	431.911	352.525	376.369	430.4	401.734	291.644	264.595	378.623	340.941	332.197	380.242
'narU'	96.9808	102.776	245.106	149.488	166.437	174.724	196.78	227.019	260.45	217.754	235.039	268.329
'narV'	166.253	198.616	418.995	210.449	397.113	381.217	370.484	439.948	479.158	471.593	407.828	389.495
'narW'	240.143	231.404	499.708	347.744	415.8	448.062	515.345	471.261	523.84	449.196	470.661	500.087
'narX'	89.2839	121.061	199.408	136.765	127.894	129.058	143.579	124.469	164.619	164.249	226.894	214.134
'narY'	169.332	182.853	487.245	255.507	408.793	426.222	389.072	381.236	479.158	465.994	426.445	435.318
'narZ'	181.647	182.853	370.923	249.676	279.147	305.768	352.537	306.085	380.974	395.69	402.592	339.707
'ndh'	257.076	145.652	468.847	415.066	45.5512	50.9613	5.12781	6.2626	4.70339	9.33232	28.5072	29.9612
'ndk'	72.3508	85.1212	103.858	112.911	67.7428	60.8888	64.0976	67.3229	59.9682	41.0622	33.7433	36.5702
'nemA'	61.5751	56.7475	102.078	76.8642	79.4226	90.6714	99.9922	111.161	134.634	95.8118	139.627	161.262
'nfi'	249.379	237.709	227.302	320.179	185.709	205.169	113.453	115.075	131.695	132.519	166.971	157.737
'nfo'	95.4414	116.017	167.954	131.994	141.909	135.676	239.725	254.418	263.39	268.771	342.087	312.389
'nfrA'	438.723	595.848	484.871	374.779	755.682	756.477	467.912	410.983	563.231	564.294	535.238	509.34
'nfrB'	187.804	208.074	166.767	172.282	313.602	315.695	171.782	165.176	246.928	197.845	190.824	215.015
'nfsA'	96.9808	98.9928	177.45	177.053	191.549	150.898	119.222	97.8531	147.569	125.053	170.462	161.262
'nhaA'	40.0238	31.5264	23.7391	33.3961	24.5276	21.1787	4.48683	2.34847	1.17585	6.8437	6.39959	8.81211
'nhaB'	149.32	177.809	308.015	218.4	233.596	265.396	230.751	206.666	238.697	242.018	322.888	355.568
'nhaR'	289.403	325.983	191.693	233.243	226.004	218.405	148.065	134.646	161.091	189.135	178.025	160.821
'nhoA'	120.071	136.824	267.065	226.882	306.01	307.753	290.362	328.004	368.04	360.228	375.248	318.558
'nikA'	544.94	411.734	325.819	449.523	374.337	374.599	285.875	284.165	335.704	332.231	290.309	267.007
'nikB'	564.952	493.072	341.843	502.533	360.321	319.004	283.952	298.256	377.447	405.645	317.652	290.359
'nikC'	477.207	404.799	317.51	356.756	295.499	299.149	269.21	269.292	308.072	312.944	287.981	256.432
'nikD'	274.009	187.267	158.458	178.113	156.509	168.106	105.12	114.292	148.745	126.92	116.938	132.182
'nikE'	394.081	336.702	265.878	266.639	256.955	199.874	198.062	216.06	254.571	221.487	204.787	178.886
'nikR'	398.699	349.943	267.658	298.445	265.131	281.28	232.674	207.449	269.269	237.041	215.259	181.089
'ninE'	426.408	638.724	288.43	276.711	652.316	630.067	444.196	456.387	472.102	530.076	572.472	556.484
'nirB'	187.804	164.568	189.319	225.822	96.9422	142.956	137.81	113.51	110.53	128.164	126.246	140.112
'nirC'	50.7995	26.4821	27.8934	27.5651	16.3517	19.855	10.2556	26.616	21.7532	21.7754	24.4348	27.7581
'nirD'	424.868	337.963	348.965	414.536	247.027	285.913	228.828	221.539	177.553	204.689	234.458	261.279
'nlpA'	1009.83	809.597	610.094	711.921	573.478	569.178	387.79	329.569	390.381	408.134	370.012	390.817
'nlpB'	243.222	273.018	310.982	268.229	378.425	366.656	193.575	185.529	248.104	221.487	285.654	290.359
'nlpC'	67.7326	81.338	133.532	78.4544	108.038	78.0965	128.836	139.343	159.915	137.496	203.623	171.836
'nlpD'	307.876	298.239	272.406	256.037	271.555	232.966	187.165	205.1	257.51	246.995	240.275	271.413
'nlpE'	0	0	0	0	0	0	0	0	0	0	0	0
'nlpI'	193.962	107.19	318.697	339.262	60.1509	41.6956	10.2556	15.6565	10.5826	12.4431	15.1263	14.9806
'nmpC'	309.415	404.799	349.558	302.156	573.478	604.917	367.92	371.059	438.003	449.196	440.99	447.655
'norR'	143.162	158.262	130.565	117.152	149.501	160.164	176.909	175.353	165.794	158.649	175.116	204
'norV'	200.119	209.335	162.019	175.462	247.027	248.85	216.65	191.009	255.747	275.615	271.692	284.19
'norW'	153.938	197.355	142.435	169.101	223.668	213.773	194.857	195.706	219.883	222.109	217.004	256.873
'npr'	637.303	489.92	451.636	515.785	299.587	352.758	133.964	133.08	159.327	187.891	264.71	316.795
'nrdD'	170.871	155.11	132.939	153.198	146.581	135.676	119.862	127.6	136.398	150.561	140.791	181.089
'nrdE'	198.58	197.986	144.808	153.198	221.916	224.362	209.599	228.585	245.164	261.305	246.093	281.987
'nrdF'	221.67	299.5	185.758	185.004	312.434	304.444	246.135	264.595	291.022	284.325	301.362	258.195
'nrdG'	303.257	226.99	194.067	251.266	218.996	189.285	192.934	189.444	228.114	201.578	224.567	263.482
'nrdH'	317.112	351.204	285.462	283.072	346.306	344.816	373.689	361.665	415.662	356.495	434.59	415.491
'nrdI'	247.84	349.943	237.984	219.991	442.08	371.951	289.08	284.165	321.594	314.81	332.779	318.558
'nrfA'	394.081	334.18	235.61	271.41	259.291	228.333	170.5	198.838	217.532	207.178	253.075	224.268
'nrfB'	464.892	397.863	302.673	379.02	300.755	340.845	234.597	196.489	264.566	254.461	250.747	299.171
'nrfC'	660.393	598.37	451.636	524.267	416.968	445.415	305.105	327.221	342.171	371.426	368.849	360.415
'nrfD'	715.811	592.696	391.695	518.966	393.025	429.531	355.101	300.605	386.266	385.114	312.416	373.193
'nrfE'	555.715	404.799	333.534	487.69	295.499	314.372	233.315	192.575	286.907	260.683	336.851	301.815
'nrfF'	615.751	428.128	401.191	460.655	350.978	362.024	266.646	257.549	266.329	274.992	294.963	354.687
'nrfG'	814.331	701.146	669.442	772.352	544.278	561.898	344.845	338.18	331.589	362.094	395.029	411.525
'nth'	93.9021	78.8159	156.084	119.272	176.949	144.28	208.958	209.014	211.652	192.868	239.694	241.011
'nudB'	13.8544	9.45791	8.30868	3.71068	14.0157	18.5314	7.05074	6.2626	5.29131	7.46586	8.72671	4.40605
'nudC'	447.959	383.361	375.078	432.03	276.811	238.261	166.654	157.348	161.091	199.09	224.567	198.713
'nudD'	238.604	365.075	605.347	470.197	554.206	616.168	381.381	369.493	423.305	365.827	708.027	672.364
'nudF'	685.023	608.459	395.849	491.4	437.408	422.912	266.646	243.459	276.324	356.495	376.412	404.916
'nudG'	93.9021	121.061	216.619	177.583	193.3	185.314	257.031	244.241	273.972	233.93	339.178	359.534
'nudH'	76.9689	102.145	42.7304	28.0952	68.9107	84.053	73.7122	60.2775	37.0392	46.0395	80.2857	49.7884
'nuoA'	213.974	156.371	315.136	284.662	210.236	178.695	546.752	565.2	623.787	567.405	691.737	719.068
'nuoB'	81.587	64.9443	141.248	155.849	103.366	127.734	277.543	258.332	309.836	283.703	386.302	386.851
'nuoC'	78.5083	89.5349	118.102	111.32	83.5105	90.6714	276.902	239.544	301.605	282.458	314.743	386.851
'nuoE'	83.1264	69.358	122.85	110.26	126.726	105.894	302.541	277.903	270.445	299.879	384.557	441.046
'nuoG'	127.768	111.603	228.489	236.424	169.941	241.57	449.324	400.806	419.777	444.219	580.617	630.947
'nuoH'	161.635	108.451	237.391	191.895	156.509	151.56	401.892	374.973	446.234	437.997	685.338	661.349
'nuoI'	0	0	0	0	0	0	0	0	0	0	0	0
'nuoJ'	83.1264	63.6833	113.948	102.309	96.9422	131.705	296.131	270.857	322.77	294.901	438.081	470.126
'nuoM'	0	0	0	0	0	0	0	0	0	0	0	0
'nuoN'	87.7445	69.358	119.882	111.851	103.366	131.705	364.074	330.352	339.82	335.964	500.331	536.657
'nupC'	374.069	61.7917	2131.77	1766.29	401.785	390.483	603.799	601.209	500.323	508.923	412.482	451.18
'nupG'	129.308	98.9928	99.7042	131.994	131.982	89.3477	198.703	149.52	216.944	246.995	215.841	193.426
'nusB'	9.23627	12.6105	15.4304	12.1922	23.9436	21.8405	0	2.34847	3.52754	1.24431	4.65424	8.81211
'ogrK'	226.289	272.388	433.832	327.07	461.936	491.743	387.79	381.236	347.463	370.804	533.493	562.212
'ogt'	172.41	188.528	325.225	240.134	340.466	351.434	298.054	291.994	370.392	324.143	383.393	367.024
'ompA'	24.63	51.7032	40.9499	51.9496	80.5905	68.8308	9.61464	18.7878	5.87923	3.73293	12.2174	10.1339
'ompC'	0	0	0	0	0	0	0	0	0	0	0	0
'ompF'	30.7876	23.96	52.226	26.5049	40.2953	38.3864	64.7386	75.934	53.501	76.525	69.8137	52.8726
'ompG'	286.324	366.336	585.762	471.257	600.341	581.091	542.266	544.846	663.765	643.308	642.286	645.927
'ompL'	480.286	435.694	327.599	465.426	285.571	328.27	256.39	199.62	217.532	232.686	246.675	265.244
'ompN'	223.21	250.95	445.701	281.482	384.849	377.246	391.636	378.887	500.911	459.15	449.135	501.409
'ompR'	46.1813	32.1569	18.9913	12.7223	24.5276	25.1497	17.3063	29.7473	37.0392	28.6191	12.7992	16.743
'ompT'	212.434	169.612	153.711	138.886	266.883	238.261	158.962	139.343	175.789	156.783	140.209	155.534
'ompW'	132.387	123.583	193.474	170.161	193.884	203.845	116.017	104.899	124.64	130.653	172.789	191.663
'ompX'	0	0	0	0	0	0	0	0	0	0	0	0.881211
'oppB'	126.229	161.415	251.634	196.136	233.012	209.802	168.577	198.055	207.537	205.933	354.886	302.255
'oppC'	175.489	208.074	247.48	228.472	250.531	228.995	193.575	212.146	208.125	204.689	310.671	311.949
'oppD'	130.847	165.829	229.082	171.222	272.723	199.212	193.575	172.221	186.96	158.649	286.236	263.041
'oppF'	147.78	203.66	269.439	231.653	302.506	303.12	177.55	159.696	175.201	174.203	228.058	222.506
'osmB'	238.604	325.352	451.636	329.721	411.129	395.777	273.697	281.034	293.962	243.885	335.106	315.033
'osmC'	109.296	153.218	294.958	199.847	306.594	286.574	287.798	313.13	403.315	357.739	333.36	327.81
'osmE'	63.1145	108.451	212.465	139.416	177.533	198.55	198.703	186.312	188.723	225.22	281.582	300.493
'osmY'	278.627	319.677	189.913	182.884	172.277	164.797	177.55	126.035	184.02	179.803	185.006	231.758
'otsA'	123.15	126.105	263.504	182.884	248.195	248.188	221.137	205.883	261.626	233.93	338.015	325.607
'otsB'	75.4295	110.973	160.239	108.67	145.413	148.251	133.323	131.515	148.745	134.385	191.988	217.218
'oxc'	170.871	221.315	266.471	267.699	321.194	274.661	239.725	219.191	248.692	271.882	263.547	243.214
'oxyR'	3.07876	0	3.56086	6.89127	1.16798	0	104.479	114.292	107.002	97.0562	108.793	80.1902
'paaA'	110.835	150.066	303.86	217.34	194.468	179.357	239.725	240.327	285.143	296.768	336.269	318.998
'paaB'	257.076	221.315	535.316	402.344	392.441	377.246	468.553	421.16	474.454	469.105	532.329	543.707
'paaC'	186.265	248.428	550.747	420.367	352.146	385.188	426.89	413.332	513.257	404.401	499.168	552.078
'paaD'	141.623	213.749	516.919	393.863	281.483	286.574	355.742	331.918	442.706	461.017	447.971	493.919
'paaE'	126.229	153.849	350.745	250.206	269.803	219.729	284.593	293.559	340.996	297.39	336.851	378.48
'paaF'	244.761	266.713	662.914	490.34	438.576	456.004	532.01	511.185	634.369	590.425	700.464	703.206
'paaG'	186.265	251.58	548.373	367.888	390.105	429.531	406.379	414.114	564.406	510.167	522.439	529.167
'paaH'	198.58	218.793	576.86	392.272	483.543	412.985	507.012	490.048	641.424	599.135	606.797	634.472
'paaI'	181.647	176.548	461.725	345.094	376.673	373.275	403.174	432.902	496.795	462.883	521.857	489.512
'paaJ'	158.556	201.769	454.603	341.383	359.737	379.893	501.884	522.144	658.474	645.175	642.286	656.061
'paaK'	113.914	131.78	210.684	173.872	228.924	233.628	286.516	276.337	268.681	307.967	289.727	308.864
'paaX'	173.95	197.986	452.823	296.855	332.29	364.671	378.176	358.534	446.822	403.156	383.975	382.005
'paaY'	70.8114	105.298	178.043	121.392	172.861	159.502	192.293	175.353	222.235	192.246	223.404	249.823
'pabA'	341.742	314.633	236.797	344.033	224.836	203.183	57.6878	79.0653	40.5667	51.6388	27.9255	27.3175
'pabB'	383.305	407.321	955.498	639.298	807.073	710.811	249.981	244.241	144.629	138.118	94.8302	122.048
'pabC'	124.69	127.997	213.058	200.907	222.5	232.966	91.6596	85.3279	81.1334	69.6813	59.3416	76.2247
'pal'	29.2482	74.4022	36.2021	61.4913	111.542	140.309	87.8137	99.4188	108.766	93.3232	78.5404	96.052
'panB'	224.749	279.324	213.652	298.445	283.235	260.101	5.12781	0.782825	0	0	0	0
'panC'	138.544	151.957	124.63	147.897	123.806	138.323	1.92293	3.91412	1.17585	0.622155	4.07246	0
'panD'	426.408	418.04	334.721	438.391	437.992	483.801	5.12781	8.61107	5.29131	12.4431	8.14493	6.60908
'panE'	407.935	411.734	365.582	451.113	520.918	534.101	8.33269	7.04542	7.05508	1.86646	3.49068	4.40605
'panF'	518.77	430.65	529.975	712.451	298.419	284.589	217.932	200.403	223.999	233.93	315.325	314.592
'pbl'	643.46	647.552	538.284	452.173	554.206	514.907	337.153	475.175	443.294	482.792	421.791	430.031
'pbpC'	81.587	87.0128	79.5259	107.08	122.638	109.203	105.761	126.818	121.7	108.255	171.625	167.43
'pbpG'	116.993	140.608	197.034	169.631	259.875	229.657	351.255	403.938	409.783	380.759	434.59	403.154
'pck'	589.582	445.783	363.208	461.715	366.161	315.033	214.727	235.63	295.138	299.256	317.07	324.286
'pcm'	355.596	464.699	324.632	363.117	425.144	426.222	364.715	302.953	388.029	414.355	356.632	326.929
'pcnB'	16.9332	34.679	13.65	33.9262	35.0394	35.7391	41.6634	52.4493	55.2648	48.5281	45.9607	27.3175
'pdhR'	0	0	0	0	0	0	0	0	0	0	0	0
'pdxA'	274.009	266.083	181.011	243.845	240.02	235.613	0	0	0	0	0	0
'pdxB'	56.957	86.3822	61.1281	46.6486	90.5183	101.261	0	0	0	0	0	0
'pdxJ'	109.296	126.105	77.152	93.8273	112.126	130.381	0	0	0	0	0	0
'pdxK'	457.195	473.526	393.475	445.812	379.593	411.661	260.877	290.428	328.061	299.879	361.286	402.273
'pdxY'	75.4295	64.9443	170.328	110.26	154.757	132.367	165.372	160.479	198.13	164.871	215.259	226.031
'pepA'	514.152	516.402	354.306	397.573	336.378	339.521	901.212	927.647	483.273	479.059	321.143	294.765
'pepB'	90.8233	59.2696	61.1281	78.9845	74.7506	91.3332	106.402	122.903	115.233	130.653	162.899	121.166
'pepD'	180.107	211.857	118.695	154.789	193.884	208.478	187.165	173.787	254.571	222.109	187.915	204.441
'pepE'	452.577	385.883	344.217	374.249	300.171	254.145	188.447	228.585	243.988	272.504	254.238	235.283
'pepN'	18.4725	17.0242	26.7065	27.035	39.1273	27.7971	12.8195	27.3989	25.8686	24.8862	36.0704	37.4515
'pepP'	172.41	138.085	151.93	186.594	134.902	101.923	171.141	182.398	199.894	237.041	166.971	223.827
'pepQ'	487.983	370.75	293.771	407.115	219.58	223.7	176.268	149.52	186.372	187.269	227.476	204
'pepT'	100.06	105.929	165.58	181.823	192.132	187.299	162.167	164.393	160.503	169.226	309.507	289.918
'perR'	0	0	0	0	0	0	0	0	0	0	0	0
'pfkA'	335.584	254.733	360.834	385.911	249.947	315.033	42.3044	40.7069	34.0996	36.7071	54.1056	41.4169
'pfkB'	72.3508	95.8402	212.465	142.596	166.437	140.971	183.319	183.181	192.839	210.288	251.329	315.473
'pflA'	107.756	97.7317	159.052	143.656	126.726	120.454	99.9922	84.5451	115.233	159.272	122.174	101.339
'pflB'	93.9021	107.82	127.598	108.67	109.206	102.584	104.479	116.641	95.2436	121.942	99.4845	76.2247
'pflC'	369.451	280.585	278.934	391.212	180.453	183.99	161.526	165.176	185.196	179.181	175.698	176.242
'pflD'	272.47	183.483	139.467	253.387	119.134	117.145	91.6596	100.202	92.304	88.346	122.756	110.592
'pfs'	15.3938	6.30527	13.65	12.7223	2.33596	7.28018	10.8966	7.82825	9.40677	8.71017	3.49068	4.84666
'pgi'	712.732	745.283	500.301	677.995	707.211	745.888	142.297	88.4592	82.8972	132.519	72.7226	77.1059
'pgm'	173.95	178.439	256.382	243.845	270.971	218.405	80.122	104.899	151.684	111.988	62.2505	81.9526
'pgpA'	0	0	0	0	0	0	0	0	0	0	0	0
'pgpB'	84.6658	108.451	274.186	194.016	114.462	101.261	184.601	136.994	158.151	183.536	226.313	223.827
'pheA'	53.8782	82.5991	74.7781	104.429	126.726	123.101	105.761	123.686	136.986	110.744	169.88	145.84
'pheL'	127.768	135.563	140.654	134.645	147.165	182.666	147.424	143.257	148.157	197.845	210.605	211.491
'pheP'	535.704	745.283	509.203	523.736	890.584	984.148	447.401	421.943	639.073	578.604	567.818	541.504
'phnB'	814.331	813.38	545.999	603.251	512.743	509.613	371.766	367.145	484.449	446.707	435.754	463.517
'phnC'	771.228	672.773	496.74	663.682	395.945	422.912	340.358	269.292	356.869	369.56	344.414	343.232
'phnD'	785.083	639.985	466.473	635.057	419.304	354.743	308.309	378.104	369.804	343.429	346.741	374.955
'phnE'	604.976	489.289	421.369	500.942	335.794	345.478	287.798	288.862	309.248	322.898	361.868	349.4
'phnF'	569.57	495.595	340.062	521.086	280.315	291.207	293.567	294.342	331.589	332.231	343.832	355.128
'phnG'	661.933	571.258	433.238	632.406	327.618	352.758	330.744	299.039	352.166	412.489	402.01	452.942
'phnH'	637.303	619.808	443.921	589.469	383.097	421.589	365.997	318.61	399.2	428.665	401.429	410.644
'phnI'	541.861	449.566	327.006	432.03	290.243	282.603	301.9	297.473	303.956	302.367	338.596	356.89
'phnJ'	229.367	218.162	201.189	198.257	169.941	181.343	132.041	138.56	182.256	160.516	189.079	200.035
'phnK'	504.916	408.582	318.104	348.274	320.026	378.57	305.105	287.297	296.901	327.876	323.47	332.657
'phnL'	417.171	326.613	262.91	352.515	296.667	281.942	229.469	208.231	259.862	309.211	281.582	362.618
'phnM'	146.241	130.519	93.7694	135.175	157.093	161.488	132.041	98.6359	134.047	115.099	148.936	126.013
'phnN'	286.324	225.729	175.076	242.255	159.429	164.135	144.22	129.949	154.624	152.428	157.081	185.495
'phnO'	657.314	551.711	410.093	472.847	401.785	326.946	235.879	281.034	339.82	343.429	320.561	345.435
'phnP'	0	1.26105	0.593477	1.0602	0.583989	0.661835	0.640976	0.782825	0	0	0	0
'phoA'	244.761	335.441	242.139	289.433	408.209	431.516	301.9	295.125	296.313	271.259	271.692	262.601
'phoB'	1196.1	1319.06	973.896	1085.11	1737.37	1700.92	1008.9	1042.72	1335.76	1167.78	1135.64	1233.25
'phoE'	206.277	261.038	159.052	209.919	292.579	277.971	229.469	230.933	253.983	274.37	257.147	251.145
'phoH'	113.914	107.82	163.206	154.258	197.388	209.14	153.193	136.212	176.377	167.36	193.733	230.437
'phoP'	0	0	0	0	0.583989	0	3.20488	0	3.52754	1.86646	0	7.04968
'phoQ'	0	0	0	0	0	0	0	0	0	0	0	0
'phoR'	669.629	745.914	495.553	603.251	908.103	808.1	372.407	342.094	308.66	264.416	222.822	218.981
'phoU'	0	0	0	0	0	0	5.76878	4.69695	11.1705	8.71017	4.65424	4.40605
'php'	404.856	316.525	276.56	417.717	234.764	197.227	171.782	193.358	195.191	195.357	212.932	243.214
'phr'	0	0	0	0	0	0	0	0	0	0	0	0
'pin'	149.32	228.881	338.875	244.905	297.251	325.623	307.027	331.918	265.741	290.546	402.592	359.093
'pinH'	240.143	271.757	252.821	217.87	318.858	309.077	236.52	262.246	263.978	297.39	267.619	283.75
'pinQ'	183.186	172.134	332.941	228.472	342.802	303.782	343.563	363.231	391.557	301.745	389.211	378.039
'pioO'	132.387	85.7517	106.232	126.693	76.5026	88.024	108.325	103.333	77.018	97.0562	123.919	126.894
'pitA'	1925.76	1972.92	1083.69	916.539	402.953	433.502	314.078	335.049	444.47	495.857	239.112	179.326
'pitB'	537.243	539.731	390.508	424.608	354.482	372.613	364.715	364.796	436.239	362.716	395.611	410.204
'pldA'	306.336	235.817	260.536	299.505	166.437	154.208	110.889	126.818	103.475	119.454	146.027	144.078
'pldB'	341.742	249.058	273.593	356.756	136.654	118.468	124.349	113.51	102.887	97.6783	151.263	139.231
'plsB'	606.515	776.81	252.228	248.086	94.0223	80.082	112.171	109.595	76.43	70.9256	25.0166	41.8575
'plsX'	110.835	115.387	425.523	328.13	156.509	189.947	66.6615	45.4038	81.7213	63.4598	73.3044	97.3738
'pmbA'	394.081	278.063	289.617	348.274	251.115	277.309	264.723	234.065	310.424	304.234	306.598	318.998
'pmrD'	78.5083	113.495	159.645	157.969	116.214	129.058	191.652	154.999	192.251	196.601	252.493	262.601
'pncA'	96.9808	136.824	308.015	185.004	202.06	217.082	169.859	222.322	229.29	258.816	333.36	302.696
'pncB'	80.0477	97.7317	253.415	201.437	178.701	188.623	139.733	148.737	161.091	139.985	208.859	206.203
'pnp'	83.1264	109.712	23.7391	30.2156	72.4147	72.14	82.0449	70.4542	71.7266	75.2807	49.4514	39.2139
'pntA'	73.8901	66.2054	164.393	109.2	125.558	101.923	192.293	162.045	181.668	144.962	169.298	222.065
'pntB'	83.1264	109.712	200.595	134.645	172.861	174.724	206.394	261.463	266.917	217.132	261.801	263.923
'pnuC'	58.4964	65.5748	85.4607	82.1651	105.702	111.85	91.6596	94.7218	116.409	131.897	140.791	133.503
'polA'	286.324	265.452	175.669	314.878	197.972	205.169	80.122	93.939	103.475	103.278	113.447	98.6956
'polB'	301.718	283.737	240.952	268.759	238.852	234.29	134.605	122.903	182.844	153.05	204.205	240.57
'potA'	98.5202	104.668	173.295	116.091	193.3	185.314	197.421	170.656	202.246	172.959	324.634	263.041
'potB'	180.107	177.809	204.156	183.414	313.602	252.159	317.924	299.039	330.413	248.24	491.605	461.754
'potC'	137.005	168.351	182.791	210.449	268.051	253.483	269.851	256.767	286.907	271.882	393.865	402.273
'potD'	130.847	182.853	213.652	160.62	282.651	281.28	252.545	245.807	265.153	290.546	410.155	445.452
'potE'	93.9021	81.9686	99.7042	103.899	134.902	158.84	107.684	108.813	154.624	135.008	151.263	132.182
'potF'	49.2601	71.8801	78.9325	91.1768	111.542	110.526	58.9698	82.9794	62.3199	77.7694	101.812	129.538
'potG'	104.678	201.138	215.432	181.293	229.508	224.362	141.656	144.823	162.267	182.291	187.333	214.134
'potH'	127.768	110.342	182.197	151.078	196.22	178.695	119.862	122.903	154.036	163.627	210.605	192.985
'potI'	67.7326	97.7317	106.826	110.79	141.909	144.942	132.682	88.4592	107.002	119.454	148.936	118.963
'poxA'	711.193	343.007	1354.31	918.129	162.349	156.193	62.8156	57.929	68.1991	120.698	75.0497	77.9871
'poxB'	104.678	140.608	165.58	199.847	186.877	209.14	126.272	122.121	159.915	124.431	207.696	210.169
'ppc'	378.687	295.087	266.471	343.503	188.629	230.98	294.208	309.999	172.262	179.181	68.6501	50.6696
'ppdA'	384.845	347.421	301.486	332.371	284.403	331.579	266.005	279.468	326.297	311.7	256.565	261.72
'ppdB'	278.627	279.954	168.547	249.676	240.02	186.637	209.599	176.918	233.993	217.132	212.932	228.674
'ppdC'	621.909	577.563	458.164	537.519	601.509	579.105	412.788	421.16	521.488	498.346	429.354	509.78
'ppdD'	124.69	104.668	89.0216	129.874	99.2782	110.526	89.0957	78.2825	104.062	91.4568	127.992	118.523
'pphA'	357.136	399.124	757.87	557.663	725.899	673.748	649.95	693.583	701.393	757.162	1057.68	1057.01
'pphB'	213.974	267.974	139.467	211.509	244.108	260.763	219.855	240.327	315.127	253.217	264.128	289.037
'ppiA'	81.587	47.2896	29.0804	34.9864	30.3674	45.6666	50.6371	58.7119	71.7266	52.261	62.2505	63.4472
'ppiB'	372.529	413.626	270.626	289.963	583.989	496.376	198.703	212.146	308.072	268.149	287.4	298.73
'ppiD'	366.372	416.779	267.065	271.94	615.525	549.985	378.817	385.15	475.042	419.332	352.559	388.173
'ppk'	16.9332	18.2853	3.56086	6.36117	22.7756	11.913	0	6.2626	2.93962	0.622155	1.74534	3.52484
'pppA'	375.608	461.546	297.332	366.828	343.97	327.608	317.924	343.66	413.898	397.557	384.557	395.664
'pps'	47.7207	105.298	169.734	130.934	126.142	149.575	153.834	127.6	182.256	205.933	224.567	231.758
'ppx'	100.06	131.15	159.645	162.74	154.757	133.029	149.347	149.52	195.191	193.49	177.443	152.009
'pqiA'	35.4057	32.7874	70.0303	78.9845	54.311	74.1255	71.1483	70.4542	99.359	62.8376	109.375	96.4926
'pqiB'	52.3389	58.0085	87.2411	97.0079	65.4068	95.9661	80.122	67.3229	81.1334	98.3005	97.1574	89.4429
'pqqL'	118.532	158.893	351.932	185.534	315.938	293.855	328.821	284.948	406.843	396.313	340.923	331.776
'prc'	315.573	360.031	884.874	827.482	443.248	465.932	150.629	141.691	125.228	158.027	182.097	174.48
'prfC'	267.852	296.348	303.267	273	296.667	247.526	22.4342	26.616	22.3411	32.9742	32.5797	48.026
'prfH'	146.241	230.773	106.826	152.138	210.236	215.096	229.469	211.363	275.148	224.598	204.205	242.774
'priA'	121.611	105.929	99.1107	190.305	188.045	187.299	22.4342	12.5252	31.1599	18.6646	33.7433	40.0951
'priB'	0	0	0	0	0	0	0	0	0	0	0	0
'priC'	546.479	474.787	452.23	562.964	590.997	575.796	342.281	313.13	405.079	379.514	356.632	406.679
'prkB'	418.711	294.456	309.795	459.065	239.436	210.463	161.526	154.999	186.96	189.135	233.876	230.877
'prlC'	646.539	579.455	410.686	445.812	393.025	390.483	323.693	335.832	419.189	386.98	297.29	294.324
'prmA'	538.782	510.727	401.191	578.337	356.817	457.99	224.342	199.62	218.707	212.155	282.745	340.147
'prmB'	83.1264	100.884	134.126	120.332	196.804	138.985	49.3551	44.621	70.5508	60.9712	65.1594	44.5011
'prmC'	0	0	0	0	0	0	0	0	0	0	0	0
'proA'	238.604	287.52	185.165	169.631	296.667	267.381	178.832	144.04	256.923	215.888	197.805	178.005
'proB'	361.754	506.313	313.356	282.012	433.904	428.869	268.569	231.716	329.237	332.853	304.853	275.819
'proC'	235.525	238.339	172.702	185.534	262.211	283.927	614.055	623.129	731.965	786.404	581.781	516.83
'proP'	280.167	229.512	185.758	186.594	122.054	129.058	174.345	187.095	208.713	232.064	211.186	172.717
'proQ'	495.68	497.486	2843.35	2163.86	401.201	414.97	328.821	307.65	350.402	342.185	309.507	289.037
'proV'	72.3508	85.7517	65.876	61.4913	144.829	140.309	157.039	126.818	135.222	141.229	189.66	185.495
'proW'	83.1264	127.997	77.7455	85.8758	155.341	155.531	151.911	149.52	169.91	162.382	193.151	181.089
'proX'	137.005	170.242	118.695	112.381	205.564	207.154	219.855	194.141	250.455	230.197	211.186	235.724
'proY'	347.899	447.674	352.525	344.563	531.43	517.555	473.681	457.953	584.984	578.604	474.151	537.098
'prpB'	748.138	909.22	580.421	608.552	737.579	843.178	635.848	587.119	593.803	642.686	404.338	413.728
'prpC'	466.432	513.88	331.16	379.02	578.733	563.883	317.924	341.312	432.712	363.961	353.723	348.959
'prpD'	386.384	464.699	296.145	354.635	485.295	445.415	338.435	305.302	331.001	353.384	283.327	276.7
'prpE'	817.41	896.61	527.601	606.432	941.975	853.767	709.56	738.204	847.785	713.612	506.731	516.83
'prpR'	477.207	480.462	283.682	332.371	454.344	460.637	399.328	356.185	406.255	378.892	220.495	237.927
'psiF'	406.396	418.67	274.78	325.48	513.911	460.637	353.178	358.534	420.365	454.795	366.522	401.391
'pspA'	227.828	315.264	305.641	258.158	447.336	467.255	241.648	230.933	217.532	172.959	244.348	254.229
'pspB'	209.355	250.95	398.817	273	390.689	359.376	283.952	328.786	348.639	313.566	431.681	398.748
'pspC'	178.568	174.026	307.421	215.22	243.524	281.942	222.419	232.499	281.027	243.263	290.309	279.344
'pspD'	241.682	311.481	482.497	348.274	478.287	505.642	418.557	402.372	498.559	495.235	580.035	549.435
'pspE'	227.828	298.239	538.284	393.863	461.352	456.004	438.428	406.286	525.016	484.036	548.037	557.366
'pspF'	278.627	298.239	563.21	371.598	510.407	518.879	367.279	358.534	413.898	409.378	475.315	402.713
'pstA'	9.23627	8.82738	9.49563	23.8544	7.00787	11.2512	24.3571	25.8332	32.3358	29.2413	34.3251	33.0454
'pstB'	464.892	321.569	338.282	467.016	197.972	264.072	169.218	192.575	179.317	205.933	161.735	191.663
'pstS'	249.379	116.648	175.076	226.882	82.3425	110.526	113.453	122.121	129.343	127.542	95.9938	115.439
'pta'	378.687	343.637	261.723	275.651	41.4632	64.198	14.1015	16.4393	7.05508	11.1988	4.65424	8.81211
'ptr'	646.539	515.771	423.743	562.964	539.022	485.125	385.868	402.372	503.85	447.329	426.445	432.234
'ptrB'	0	0	0	0	0	0	0	0	0	0	0	0
'ptsA'	274.009	207.444	217.213	320.179	144.829	148.913	137.81	117.424	136.398	129.408	146.027	176.683
'ptsG'	160.095	154.479	317.51	259.748	235.348	294.516	88.4547	92.3733	95.8315	103.278	89.0124	81.0714
'ptsI'	1682.54	1703.68	963.807	1040.58	176.365	150.898	4.48683	4.69695	5.87923	4.35508	1.16356	3.96545
'ptsN'	657.314	557.386	407.125	583.107	455.512	522.188	272.415	239.544	236.933	262.549	166.971	173.598
'ptsP'	1163.77	644.399	2402.4	1550.54	369.665	367.318	199.984	201.186	253.395	220.865	365.358	412.407
'purA'	563.412	445.783	245.106	297.385	212.572	228.333	0	0	0	0	0	0
'purB'	0	0	0	0	0	0	0	0	0	0	0	0
'purC'	418.711	465.329	414.84	465.426	522.67	556.603	0	0	0	0	0	0
'purD'	406.396	462.177	358.46	473.377	332.874	322.975	0	0	0	0	0	0
'purE'	424.868	530.274	306.828	357.816	630.708	619.477	0	0	0	0	0	0
'purF'	100.06	89.5349	141.841	119.802	167.021	180.681	0	0	0	0	0	0
'purH'	307.876	197.986	217.213	264.519	202.06	217.082	0	0	0	0	0	0
'purK'	369.451	433.803	357.273	353.045	495.223	528.144	0	0	0	0	0	0
'purL'	147.78	222.576	236.797	245.435	282.067	256.792	0	0	0	0	0	0
'purM'	83.1264	138.085	117.508	138.355	139.573	150.898	0	0	0	0	0	0
'purN'	104.678	91.4265	103.858	109.73	126.142	116.483	1.28195	2.34847	0	3.11077	2.32712	9.25271
'purR'	246.3	299.5	1001.2	869.36	370.249	307.753	220.496	226.236	211.064	219.621	655.085	648.13
'purT'	269.391	318.416	590.51	407.645	558.294	589.695	551.239	439.948	579.104	547.496	719.663	806.308
'purU'	192.422	150.696	291.991	256.037	318.858	266.058	166.013	151.085	199.306	164.249	260.638	242.333
'puuA'	243.222	259.777	377.451	304.806	364.993	384.526	281.388	347.574	390.381	340.941	388.629	405.797
'puuB'	203.198	211.857	349.558	278.831	290.827	268.705	202.548	212.928	233.406	264.416	274.019	289.918
'puuC'	115.453	126.736	224.928	176.523	201.476	203.183	140.374	165.176	148.745	144.34	167.553	193.426
'puuD'	255.537	262.93	503.862	338.732	402.369	410.338	358.306	313.913	396.848	370.182	408.41	448.536
'puuE'	206.277	231.404	375.671	327.6	406.457	364.671	268.569	274.772	312.775	310.455	334.524	354.687
'puuP'	244.761	350.573	513.358	367.358	436.24	498.362	315.36	303.736	422.717	393.824	481.133	412.847
'puuR'	240.143	284.368	414.84	383.261	448.504	422.912	313.437	266.16	352.754	312.944	354.886	370.108
'pykA'	347.899	430.02	651.638	535.929	735.243	796.849	622.388	630.174	736.08	730.41	996.008	1022.2
'pykF'	126.229	151.957	424.336	263.459	216.076	250.174	1398.61	1414.56	878.945	862.929	671.957	649.893
'pyrB'	320.191	286.89	243.919	266.639	248.779	229.657	0	0	1.76377	0	0	0
'pyrC'	126.229	152.588	281.902	223.701	304.258	359.376	0	0	0	0	0	0
'pyrD'	78.5083	87.0128	125.224	101.249	164.101	166.782	0	0	0	0	0	0
'pyrF'	223.21	260.408	452.23	381.67	488.215	479.168	0	0	0	0.622155	0	0
'pyrI'	198.58	235.817	154.304	185.004	186.293	170.092	57.6878	41.4897	66.4353	47.2838	169.298	167.871
'pyrL'	350.978	292.565	204.75	241.194	194.468	232.966	245.494	248.938	265.741	244.507	254.238	230.877
'qor'	541.861	494.964	400.004	415.597	330.538	362.024	267.287	247.373	294.55	281.836	285.072	281.987
'qseB'	286.324	305.806	214.245	257.097	230.092	204.507	200.625	205.883	196.954	215.888	210.605	249.823
'qseC'	157.017	81.338	123.443	173.872	152.421	133.029	105.12	118.989	151.096	146.829	139.046	158.177
'queA'	432.565	570.627	483.684	480.268	629.541	624.11	428.172	392.195	530.895	437.375	525.348	535.335
'racC'	24.63	75.0328	111.574	76.3341	5.83989	12.5749	31.4078	41.4897	36.4512	46.6616	45.9607	34.3672
'radA'	717.35	633.68	743.033	917.599	529.094	521.526	351.896	306.867	396.26	433.642	351.977	352.925
'rarA'	70.8114	109.081	148.963	128.284	170.525	174.724	155.116	135.429	159.327	164.249	175.116	214.575
'rarD'	366.372	286.89	235.017	311.697	199.14	161.488	173.704	131.515	130.519	134.385	210.023	160.38
'rbbA'	780.465	573.149	432.051	566.674	425.144	412.985	394.841	359.317	326.885	410	307.18	293.443
'rbfA'	13.8544	6.30527	4.74782	10.0719	7.59186	5.95651	8.97366	12.5252	4.11546	8.08801	14.5445	18.5054
'rbn'	329.427	312.111	271.813	326.01	168.189	154.208	173.704	149.52	148.157	187.269	185.006	219.862
'rbsA'	395.62	222.576	251.041	427.789	164.685	168.768	151.27	118.989	124.64	143.718	168.716	178.886
'rbsB'	255.537	175.287	164.393	278.301	129.062	175.386	82.6859	114.292	112.293	113.232	130.319	124.691
'rbsC'	294.021	252.841	267.065	425.138	160.597	191.27	156.398	122.903	133.459	135.63	173.371	191.223
'rbsD'	340.203	246.536	278.934	435.21	161.181	211.125	143.579	143.257	164.619	135.008	218.168	240.13
'rbsK'	387.923	224.468	304.454	435.21	167.605	158.84	174.986	176.136	194.603	155.539	253.075	231.318
'rbsR'	309.415	160.784	310.982	364.177	99.8622	107.217	115.376	130.732	126.404	113.854	195.478	177.123
'rcsA'	80.0477	108.451	181.604	172.812	212.572	193.918	166.013	147.171	185.784	169.226	250.747	253.789
'rcsD'	110.835	112.234	191.693	178.643	150.669	154.208	289.08	274.772	319.242	326.631	383.975	400.951
'rcsF'	140.083	137.455	100.298	130.404	173.445	162.811	130.118	133.863	145.217	126.92	141.373	135.706
'rdgC'	577.267	827.252	332.941	401.814	771.45	929.216	513.422	533.104	642.012	640.197	541.056	539.301
'recA'	47.7207	32.1569	29.0804	51.4195	24.5276	43.0193	58.3288	36.7928	52.3252	43.5508	42.47	47.5854
'recB'	44.642	25.2211	16.0239	12.1922	23.9436	25.8116	18.5883	26.616	18.2256	16.7982	22.1077	17.6242
'recC'	41.5632	45.398	16.6174	21.2039	33.8714	31.7681	28.2029	23.4847	15.286	27.3748	17.4534	25.5551
'recD'	386.384	308.328	145.402	154.789	333.458	352.096	192.934	254.418	286.319	231.442	250.166	303.136
'recE'	47.7207	73.1412	154.898	137.295	105.118	97.9516	78.1991	73.5855	67.0233	71.5478	83.7764	101.78
'recF'	277.088	189.158	211.871	269.82	94.0223	72.8018	79.481	88.4592	124.052	109.499	112.865	120.285
'recG'	778.925	669.62	338.875	471.787	504.567	475.197	258.954	302.953	259.862	286.813	446.808	499.206
'recJ'	1868.8	2112.9	753.716	952.585	1294.7	1257.49	930.056	848.582	1045.33	1142.9	1036.73	990.04
'recN'	101.599	166.459	149.556	108.14	161.765	167.444	151.27	136.212	168.734	184.158	211.186	193.866
'recO'	160.095	149.435	133.532	101.249	136.654	141.633	107.043	128.383	118.761	133.141	157.663	163.465
'recQ'	338.663	249.689	164.987	273.53	106.87	114.497	119.222	100.202	119.348	121.32	154.172	134.825
'recR'	230.907	191.05	108.013	112.381	194.468	180.019	116.658	116.641	152.86	130.653	131.482	134.385
'recT'	346.36	370.75	380.419	331.311	293.163	319.004	179.473	191.792	171.086	222.109	254.82	247.62
'recX'	129.308	129.889	57.5673	85.3457	107.454	125.087	120.503	106.464	154.036	111.366	119.265	134.825
'relA'	155.477	176.548	96.1433	89.5865	120.886	152.884	46.7912	58.7119	66.4353	74.6586	28.5072	32.1642
'relE'	187.804	246.536	515.732	288.903	427.48	415.632	432.659	430.554	492.68	454.795	539.892	460.873
'rem'	135.465	197.355	426.117	250.736	312.434	377.908	345.486	416.463	399.788	424.31	442.153	403.594
'renD'	515.692	614.134	507.423	421.428	779.042	782.289	504.448	502.574	603.209	638.331	584.69	557.366
'rep'	15.3938	17.0242	14.8369	18.5534	11.0958	15.884	7.69171	6.2626	8.81885	4.97724	6.39959	4.40605
'rfaB'	347.899	300.131	242.139	271.94	241.772	245.541	110.889	132.297	119.936	120.698	121.01	121.166
'rfaC'	1759.51	1244.66	1847.49	1619.45	1099.65	1070.19	883.265	938.607	761.361	698.058	251.329	214.575
'rfaD'	1510.13	1030.28	1482.51	1209.15	692.611	801.482	547.393	637.219	495.031	424.932	165.226	127.776
'rfaE'	692.72	457.132	824.933	717.222	454.928	391.806	469.835	482.22	464.459	380.759	159.408	181.97
'rfaF'	1964.25	1616.67	1913.96	1680.94	1002.71	1024.52	1331.95	1419.26	1007.11	1172.76	450.298	405.357
'rfaG'	1907.29	1818.44	1950.17	2004.83	1337.34	1323.01	1208.88	1358.2	894.231	1113.66	659.157	637.115
'rfaH'	466.432	506.313	570.331	944.634	438.576	358.053	425.608	395.327	285.143	319.788	254.82	255.11
'rfaI'	1577.86	1684.77	1131.17	1211.27	1069.28	1048.35	643.54	726.461	637.309	704.901	641.122	586.005
'rfaJ'	937.481	959.663	819.592	774.473	570.558	676.395	392.277	463.432	468.575	469.727	417.718	370.99
'rfaK'	1129.9	996.233	833.242	814.76	658.74	649.922	437.146	537.018	459.756	523.232	470.079	519.033
'rfaL'	842.04	830.405	601.192	679.055	644.724	626.096	385.227	379.67	356.282	417.466	349.65	328.251
'rfaQ'	3124.94	2835.48	3566.2	2852.99	1349.02	1393.16	502.525	680.275	502.087	605.357	475.315	473.21
'rfaS'	768.15	808.336	415.434	504.123	688.523	610.212	433.941	450.124	408.019	430.531	415.391	349.841
'rfaY'	785.083	642.507	588.136	551.832	477.119	373.275	176.268	239.544	242.224	212.155	221.658	212.372
'rfaZ'	320.191	300.762	179.824	190.835	244.108	247.526	162.808	188.661	161.091	176.692	182.097	148.925
'rfbA'	70.8114	68.7275	101.485	86.4059	107.454	148.913	85.8908	79.0653	84.661	92.0789	180.352	192.545
'rfbB'	120.071	169.612	380.419	282.012	284.403	243.555	180.114	180.833	201.07	223.354	381.648	370.549
'rfbC'	186.265	231.404	205.343	194.546	370.833	319.004	354.46	332.701	266.917	271.882	507.313	477.616
'rfbD'	96.9808	126.736	61.7216	47.1787	214.908	256.13	273.056	231.716	191.075	221.487	386.884	352.044
'rfbX'	118.532	166.459	154.304	90.1166	410.545	444.091	270.492	222.322	278.676	295.524	556.764	456.026
'rfe'	240.143	113.495	139.467	229.532	95.1903	111.188	33.3307	46.9695	69.9629	51.6388	98.9027	90.7647
'rffA'	261.694	218.793	102.078	159.029	106.87	121.116	148.706	149.52	120.524	149.317	196.06	167.871
'rffC'	266.312	317.786	87.8346	156.379	123.222	119.792	147.424	155.782	145.217	153.05	187.915	187.698
'rffD'	267.852	201.138	131.752	230.062	181.037	204.507	144.22	108.813	129.931	116.965	151.263	149.806
'rffE'	0	0	0	0	0	0	0	0	0	0	0	0
'rffG'	863.591	501.269	880.72	1326.83	184.541	232.966	204.471	201.186	185.196	223.976	242.603	248.061
'rffH'	423.329	660.793	123.443	141.006	233.596	271.352	189.729	194.923	179.317	207.8	291.472	299.171
'rffM'	181.647	176.548	113.354	177.053	171.109	148.251	103.838	99.4188	112.881	77.7694	129.737	107.948
'rffT'	223.21	186.636	63.502	130.404	122.054	153.546	127.554	104.116	115.233	134.385	120.429	141.434
'rhaA'	200.119	162.676	137.093	174.402	102.198	82.0675	82.6859	92.3733	95.2436	82.1244	126.828	116.32
'rhaB'	401.778	337.963	273.593	367.358	161.181	213.773	194.857	154.999	190.487	190.379	216.422	235.724
'rhaD'	400.238	354.356	226.708	367.358	190.381	234.951	208.317	170.656	176.377	187.269	203.623	203.56
'rhaR'	358.675	334.81	224.928	357.816	211.988	210.463	185.242	169.09	178.141	174.203	217.586	198.713
'rhaS'	389.463	324.091	272.999	339.262	214.908	248.188	182.037	170.656	189.311	213.399	211.768	227.793
'rhaT'	391.002	399.124	324.038	379.02	226.588	239.584	208.958	194.141	201.658	238.285	214.095	249.823
'rhlB'	153.938	165.198	127.004	187.655	67.7428	67.5072	206.394	215.277	179.317	186.646	129.155	131.3
'rhlE'	75.4295	107.19	121.663	126.693	154.757	136.338	123.708	126.818	171.086	165.493	217.004	212.812
'rhoL'	483.365	394.71	324.038	454.824	183.373	211.787	219.214	185.529	178.729	179.803	208.277	187.698
'rhsD'	0	0	0	0	0	0	0	0	0	0	0	0
'rhsE'	132.387	184.745	397.036	297.385	361.489	380.555	402.533	416.463	416.25	485.903	406.083	378.921
'rhtA'	127.768	214.379	230.863	180.233	282.067	271.352	247.417	252.852	283.379	284.947	333.36	336.622
'rhtB'	277.088	175.287	160.239	254.447	122.054	137	137.169	115.075	100.535	85.8574	109.375	130.419
'rhtC'	275.549	240.231	207.717	257.097	103.366	126.41	111.53	108.813	95.2436	105.144	114.611	118.082
'rihA'	133.926	196.725	169.141	168.571	255.203	252.821	221.137	175.353	232.818	233.308	250.747	214.134
'rihB'	149.32	139.347	118.695	111.851	90.5183	110.526	150.629	165.176	156.388	139.985	201.296	216.778
'rihC'	381.766	338.593	218.4	301.095	299.587	286.574	155.757	147.954	204.597	215.266	239.112	242.774
'rimI'	60.0357	61.1612	21.9587	28.6253	153.589	122.439	60.8927	75.1512	39.3909	31.7299	136.718	156.855
'rimJ'	78.5083	60.5306	175.669	169.631	176.949	156.855	176.268	157.348	171.674	149.317	250.166	252.907
'rimK'	73.8901	83.8601	127.004	103.899	147.749	127.734	87.8137	108.03	89.9523	121.32	108.211	137.028
'rimL'	135.465	150.696	322.258	186.594	302.506	285.913	312.796	277.12	395.084	361.472	367.685	382.886
'rimM'	0	1.26105	0.593477	0	0	0	0	0	0	0	0	0
'rlmB'	269.391	165.198	244.513	267.699	158.261	178.695	226.265	185.529	212.24	173.581	233.876	236.164
'rlpA'	143.162	179.7	128.785	145.777	224.252	203.183	130.759	144.823	178.729	166.115	189.66	180.648
'rluA'	464.892	353.726	291.397	431.499	289.075	297.164	193.575	158.913	248.692	228.953	298.453	284.631
'rluB'	64.6539	57.378	170.921	116.091	138.989	127.072	80.122	73.5855	82.8972	65.3263	103.557	84.5962
'rluC'	20.0119	14.5021	14.8369	16.433	22.1916	19.1932	18.5883	20.3534	25.2807	22.3976	37.234	44.9417
'rluD'	227.828	298.87	141.841	204.088	102.198	118.468	82.0449	106.464	99.947	111.366	101.23	109.27
'rmf'	95.4414	86.3822	179.824	130.934	141.909	154.208	132.682	141.691	125.228	118.209	146.027	167.871
'rmuC'	157.017	176.548	157.271	238.014	124.974	129.72	123.708	84.5451	99.947	90.2124	107.629	128.657
'rna'	263.234	283.107	178.043	187.124	333.458	374.599	274.338	246.59	301.605	329.12	290.89	302.255
'rnb'	32.3269	38.4622	91.9889	43.468	30.9514	41.6956	137.81	133.863	143.453	148.695	75.0497	102.22
'rnc'	9.23627	10.719	15.4304	19.6136	5.2559	4.63284	21.7932	18.7878	11.1705	6.22155	0	0
'rnd'	130.847	218.793	200.002	146.837	257.539	231.642	245.494	255.201	299.253	293.657	421.209	437.08
'rng'	104.678	131.78	64.0955	47.1787	111.542	95.3042	46.1503	34.4443	46.4459	77.1472	46.5424	50.6696
'rnhA'	283.246	432.542	195.847	180.763	152.421	158.179	101.274	101.767	151.096	109.499	51.1967	40.0951
'rnhB'	137.005	143.13	100.298	112.911	147.749	131.043	159.603	121.338	122.288	156.161	154.754	193.426
'rnk'	164.713	194.833	185.758	172.812	226.004	237.599	144.861	164.393	230.466	227.087	246.675	207.084
'rnr'	0	0	0	0	0	0	2.5639	3.1313	1.76377	2.48862	0.581781	0.881211
'rnt'	3.07876	10.719	51.039	34.4563	8.17585	11.2512	24.3571	33.6615	44.0943	42.9287	35.4886	32.6048
'rob'	334.045	366.967	225.521	319.119	231.844	259.439	224.983	206.666	267.505	271.882	239.112	286.834
'rof'	253.997	265.452	211.871	238.014	296.083	319.004	228.187	254.418	291.61	296.768	267.037	256.432
'rpe'	4.61813	1.89158	4.15434	8.48156	1.75197	0	79.481	84.5451	66.4353	72.17	58.1781	85.0368
'rph'	822.028	757.263	436.206	531.688	315.354	315.695	206.394	237.979	234.581	311.077	297.29	242.333
'rpiA'	147.78	88.9044	221.367	168.041	58.9829	46.9903	0	0.782825	0	0	0	0.881211
'rpiB'	615.751	592.065	433.238	502.533	408.793	388.497	293.567	335.832	375.683	331.609	318.816	382.005
'rpiR'	638.842	434.433	388.134	427.789	275.643	271.352	269.21	273.989	306.308	279.348	272.855	289.918
'rplD'	0	0	0	0	0	0	0	0	0	0	0	0
'rplI'	115.453	73.7717	157.271	166.981	14.5997	22.5024	38.4586	63.4088	81.1334	75.2807	50.6149	63.0066
'rplU'	1.53938	0.630527	2.37391	3.71068	4.67191	1.32367	3.20488	2.34847	4.11546	10.5766	7.56315	7.04968
'rpmA'	0	0	0	0	0	0	0	0	0	0	0	0
'rpmB'	23.0907	27.7432	10.0891	9.01166	11.0958	1.9855	14.1015	10.1767	18.2256	8.08801	2.9089	0.881211
'rpmE'	186.265	137.455	97.3302	158.499	129.646	133.029	53.842	69.6714	44.6822	72.7921	42.47	42.7387
'rpmF'	9.23627	6.30527	17.2108	37.6369	8.17585	13.8985	12.1785	7.82825	8.81885	3.11077	5.23603	11.4557
'rpmH'	9.23627	4.41369	2.37391	6.36117	2.33596	3.30917	1.28195	0	0.587923	0	0	0.440605
'rpmI'	0	0	1.18695	6.36117	0	0	0	2.34847	9.40677	4.97724	8.14493	2.20303
'rpmJ'	0	8.19686	2.37391	4.24078	5.2559	3.30917	2.5639	2.34847	2.35169	0	10.4721	8.81211
'rpoD'	50.7995	47.2896	10.0891	29.1554	29.1995	21.8405	49.3551	38.3584	41.7426	28.6191	29.089	43.6199
'rpoS'	137.005	108.451	87.8346	100.188	43.7992	31.1062	44.8683	68.8886	85.8368	64.0819	50.6149	52.8726
'rpoZ'	2309.07	2308.99	1515.15	1759.92	1103.74	1180.71	626.874	696.714	584.984	642.686	476.478	433.996
'rpsO'	13.8544	13.2411	20.7717	36.0466	3.50394	3.97101	8.97366	7.82825	11.7585	6.8437	9.89027	17.6242
'rpsT'	310.954	409.212	160.239	144.717	48.4711	33.7536	44.2273	51.6664	35.8633	45.4173	28.5072	31.7236
'rpsU'	16.9332	14.5021	1.78043	17.4932	7.00787	13.2367	28.8439	14.8737	14.1102	9.95448	7.56315	11.0151
'rraA'	366.372	334.81	270.626	346.684	185.125	226.348	133.323	118.207	160.503	171.093	148.354	173.158
'rrmA'	197.04	233.295	488.432	291.554	341.05	337.536	403.174	389.847	405.667	401.912	604.47	577.634
'rrmJ'	0	0	0	0	0	0	0	0	0	0	0	0
'rsd'	549.558	462.807	422.556	555.012	311.85	306.43	208.317	191.009	192.839	223.354	245.511	240.57
'rseB'	124.69	170.242	186.352	189.245	176.365	190.608	161.526	151.085	185.196	164.249	191.988	145.84
'rseC'	126.229	151.327	150.15	150.548	176.365	159.502	142.297	128.383	106.414	158.027	158.244	154.212
'rsgA'	3.07876	0	1.78043	2.12039	0	0	1.92293	0	0	0	0	0
'rsmB'	258.616	272.388	131.752	174.932	185.125	208.478	116.017	90.8077	125.228	98.3005	154.172	137.028
'rsmC'	183.186	129.889	110.387	124.043	133.15	107.879	66.6615	90.0249	97.5953	101.411	139.627	130.419
'rspA'	247.84	201.138	512.764	286.783	412.296	415.632	461.503	471.261	486.213	493.991	544.547	518.592
'rspB'	0	0	0	0	0	0	0	0	0	0	0	0
'rssA'	158.556	134.933	563.803	349.864	190.381	198.55	134.605	116.641	118.173	110.744	185.006	217.659
'rssB'	230.907	274.91	181.604	175.462	275.643	292.531	137.81	113.51	132.871	152.428	190.824	192.985
'rstA'	109.296	88.9044	194.067	135.175	193.3	152.884	214.086	156.565	262.802	225.22	270.528	248.501
'rstB'	96.9808	144.391	280.121	185.534	266.883	225.686	285.234	289.645	286.907	259.439	342.087	342.35
'rsuA'	133.926	141.869	160.239	154.258	199.14	226.348	349.973	313.13	343.935	349.029	330.451	354.247
'rsxA'	84.6658	92.6875	183.978	123.513	139.573	155.531	136.528	127.6	135.222	135.63	150.681	136.588
'rsxB'	103.138	102.776	183.978	111.851	120.302	90.6714	114.735	113.51	111.118	82.1244	105.884	149.806
'rsxC'	113.914	102.145	199.408	100.188	151.253	144.942	163.449	144.823	133.459	130.653	172.789	120.726
'rsxD'	95.4414	97.1012	189.319	123.513	149.501	163.473	127.554	97.0703	115.233	121.942	144.282	138.791
'rsxE'	95.4414	101.515	220.18	133.585	173.445	161.488	107.684	166.742	168.734	132.519	159.99	138.35
'rsxG'	110.835	138.085	216.619	121.392	169.941	189.947	175.627	147.954	156.976	131.275	146.027	158.618
'rtcA'	320.191	261.038	185.165	243.845	212.572	188.623	164.731	188.661	214.004	195.979	179.77	174.039
'rtcB'	241.682	212.488	208.904	236.424	177.533	172.739	143.579	137.777	174.025	202.2	215.259	188.138
'rtcR'	229.367	174.026	130.565	157.969	149.501	118.468	124.349	104.899	114.645	153.672	122.756	149.365
'rtn'	203.198	158.893	286.649	241.725	195.636	192.594	305.105	298.256	336.88	307.344	406.665	393.901
'rumA'	392.541	439.478	312.762	367.888	324.698	415.632	294.849	354.62	328.649	394.446	342.669	337.944
'rumB'	87.7445	115.387	143.621	142.066	191.549	171.415	95.5054	98.6359	102.887	113.854	164.062	137.469
'rusA'	218.592	290.673	169.734	162.74	290.827	323.637	251.263	273.206	288.082	340.319	335.687	269.21
'ruvA'	146.241	120.431	188.132	199.317	343.97	305.106	278.825	299.822	266.329	250.106	365.94	356.89
'ruvB'	107.756	107.19	164.987	154.789	248.779	219.729	212.163	210.58	195.778	176.07	266.456	269.65
'ruvC'	113.914	134.302	179.824	188.715	234.18	231.642	196.139	198.838	199.894	202.822	235.621	276.7
'rzoD'	324.809	336.071	297.332	216.28	422.224	423.574	222.419	291.211	316.891	345.918	286.236	297.409
'rzpD'	247.84	325.983	298.519	294.204	474.783	414.97	321.77	299.039	357.457	361.472	408.41	352.925
'sanA'	210.895	263.56	423.743	344.563	318.274	313.71	228.187	251.287	242.812	284.947	322.306	380.242
'sapA'	221.67	266.083	405.345	377.96	407.625	419.603	245.494	207.449	327.473	270.637	388.629	342.35
'sapB'	193.962	225.729	378.638	319.649	293.163	322.314	172.423	140.908	160.503	137.496	86.6853	99.5768
'sapC'	357.136	374.533	578.64	444.222	502.815	538.072	262.159	266.16	276.324	233.308	138.464	140.112
'sapD'	253.997	266.713	456.977	338.202	397.697	422.912	224.983	210.58	174.613	215.888	130.901	115.439
'sapF'	92.3627	100.254	157.271	127.223	154.173	156.193	89.0957	104.116	82.8972	85.2352	37.8157	40.5357
'sbcB'	164.713	215.01	363.801	267.699	425.728	410.338	232.033	227.802	225.763	293.035	464.843	460.433
'sbcC'	561.873	652.596	427.304	495.641	746.922	752.506	570.469	580.073	706.096	711.745	602.143	575.431
'sbcD'	548.019	645.66	476.562	580.987	768.53	790.893	601.235	552.674	754.894	645.797	712.681	682.498
'sbmA'	523.389	595.218	397.036	437.331	705.459	691.617	514.063	483.786	628.49	624.021	536.402	582.921
'sbmC'	150.859	174.656	346.591	277.771	415.216	387.173	245.494	182.398	271.033	237.663	459.607	465.279
'sbp'	426.408	321.569	236.204	414.536	204.98	255.468	194.857	165.176	232.818	210.288	217.004	235.724
'sdaA'	292.482	338.593	713.953	636.117	553.038	553.294	537.138	546.412	561.467	573.627	786.567	821.729
'sdaB'	392.541	424.345	275.373	358.346	369.665	377.246	259.595	313.913	358.633	377.648	368.849	328.251
'sdaC'	426.408	438.847	314.543	366.297	376.673	412.985	233.956	218.408	293.374	315.432	278.673	241.892
'sdhA'	0	0	0	0	0	0	0	0	0	0	0	0
'sdhB'	101.599	184.745	94.3629	80.0447	237.684	189.285	362.151	342.094	423.893	398.179	423.536	432.674
'sdhC'	183.186	227.62	146.589	146.837	321.778	285.251	781.991	670.098	792.521	946.297	854.054	757.841
'sdhD'	178.568	296.978	205.937	173.342	339.298	384.526	743.532	699.845	803.691	854.841	706.282	771.5
'sdiA'	53.8782	99.6233	135.906	106.55	176.365	176.048	212.163	176.136	198.13	174.203	258.892	275.819
'secB'	449.498	383.361	130.565	165.39	307.178	328.27	167.295	173.787	177.553	192.868	119.847	105.745
'secD'	0	0	0	0	0	0	0	0	0	0	0	0
'secF'	0	1.26105	2.96739	0	0	0	0	0	0	0	0	0.881211
'secG'	124.69	141.869	86.0542	90.6467	94.0223	116.483	99.3513	75.934	85.8368	93.9454	27.9255	41.8575
'selA'	823.567	626.744	534.129	612.263	405.873	371.289	305.105	318.61	331.589	326.631	276.346	279.344
'selB'	897.457	826.621	610.688	539.639	442.08	487.772	310.873	312.347	327.473	353.384	250.747	286.393
'selD'	80.0477	112.234	265.284	158.499	117.382	102.584	174.986	166.742	167.558	183.536	283.327	229.555
'seqA'	15.3938	10.719	3.56086	12.7223	18.6877	18.5314	7.69171	17.2221	10.5826	7.46586	25.5983	23.7927
'serA'	264.773	245.906	194.067	168.041	175.781	172.077	5.76878	10.1767	3.52754	8.08801	5.81781	13.2182
'serB'	675.787	488.028	356.68	433.62	353.314	319.666	16.6654	6.2626	8.23093	6.8437	15.7081	18.946
'serC'	78.5083	87.0128	91.3955	94.8875	99.8622	78.0965	0	0	0	0	0	0
'setA'	346.36	351.204	312.762	350.925	306.594	349.449	193.575	178.484	226.35	217.754	304.853	266.566
'setB'	41.5632	39.0927	74.7781	76.8642	73.5827	51.6231	104.479	114.292	154.624	125.675	164.644	144.519
'setC'	1048.32	849.951	644.516	892.684	675.676	619.477	369.202	385.933	403.903	383.247	420.627	404.035
'sfcA'	232.446	270.496	520.479	380.61	547.782	543.366	545.471	472.826	644.364	530.076	542.801	592.614
'sfmA'	247.84	329.135	264.691	244.375	407.041	385.188	259.595	291.211	382.738	350.273	329.288	286.393
'sfmC'	233.985	292.565	227.302	262.398	396.529	360.038	301.259	310.781	335.116	362.094	325.215	384.648
'sfmF'	138.544	174.026	144.808	128.284	195.636	200.536	182.037	196.489	261.626	269.393	232.712	251.586
'sfmH'	172.41	216.271	224.928	206.208	339.298	336.212	228.828	245.024	328.061	314.188	287.4	309.305
'sfsB'	244.761	193.572	135.906	219.991	119.134	140.971	101.915	84.5451	97.5953	85.2352	149.518	137.028
'sgbE'	897.457	762.938	519.886	538.049	620.781	542.705	406.379	422.725	509.73	456.039	388.629	403.154
'sgbH'	1297.7	1059.92	736.505	874.661	796.561	702.207	493.551	506.488	575.577	526.965	485.205	503.171
'sgbU'	697.338	575.041	370.33	493.521	430.4	369.966	276.261	295.908	332.177	306.1	297.872	319.879
'sgcB'	623.448	555.495	373.297	382.2	388.353	429.531	283.311	252.852	342.171	316.677	382.23	389.936
'sgcC'	574.188	552.342	333.534	367.888	377.257	364.671	292.285	277.903	321.006	365.205	389.793	389.936
'sgcE'	862.052	895.349	457.571	523.736	599.757	579.105	355.101	389.847	443.882	502.079	496.259	529.167
'sgcQ'	537.243	440.739	264.691	341.913	435.656	353.42	260.877	237.196	289.846	290.546	298.453	314.592
'sgcR'	414.093	436.955	277.747	291.024	321.194	324.299	239.084	234.847	265.741	262.549	294.963	302.255
'sgcX'	469.51	447.674	279.528	300.565	291.411	306.43	226.905	216.842	222.235	253.839	303.689	302.255
'sgrR'	361.754	357.509	345.997	345.094	323.53	304.444	180.755	158.913	228.702	214.643	301.944	328.251
'shiA'	123.15	173.395	258.756	175.992	282.067	277.309	178.191	189.444	222.823	201.578	373.503	360.856
'sieB'	149.32	208.074	340.062	236.954	325.282	301.797	303.823	311.564	365.1	354.628	382.23	432.674
'sixA'	260.155	296.978	304.454	294.734	390.105	440.12	394.841	345.226	357.457	375.782	290.309	278.463
'slp'	618.83	576.302	342.436	338.732	438.576	393.13	344.204	335.832	389.793	458.528	303.689	308.424
'slt'	297.1	330.396	183.384	195.606	229.508	214.434	125.631	150.302	164.031	176.692	216.422	176.683
'slyA'	104.678	134.302	249.854	147.897	246.444	232.966	245.494	212.928	283.379	219.621	328.706	322.082
'slyB'	46.1813	59.2696	127.598	74.7438	96.9422	95.9661	114.094	108.813	134.634	129.408	118.101	141.875
'slyD'	220.131	211.227	157.865	231.123	148.333	140.971	119.222	84.5451	116.409	128.786	157.663	160.38
'slyX'	113.914	101.515	87.8346	111.32	87.0144	66.8453	117.299	102.55	87.6006	108.877	108.211	116.76
'smf'	994.438	960.924	871.818	1060.73	687.355	757.139	353.819	309.216	369.804	426.798	510.222	536.217
'smg'	763.532	672.773	548.966	720.403	449.088	557.927	273.697	248.155	268.681	262.549	349.068	372.311
'smpA'	241.682	259.147	459.945	316.468	247.611	287.898	167.936	185.529	199.894	201.578	194.315	156.855
'smpB'	10.7756	32.1569	60.5347	34.9864	44.9672	47.6521	46.1503	62.626	58.2044	47.2838	59.3416	75.3435
'smtA'	123.15	116.017	116.915	89.0564	161.765	188.623	214.086	184.747	206.949	199.712	262.965	235.724
'sodA'	386.384	317.155	251.041	311.697	204.98	217.082	130.759	128.383	50.5614	69.0592	20.9441	25.5551
'sodB'	58.4964	64.9443	135.906	83.7554	120.886	107.879	116.658	118.989	144.041	131.275	176.861	162.583
'sodC'	76.9689	73.1412	137.093	99.6584	129.062	101.261	170.5	154.216	186.96	179.181	250.747	226.471
'sohA'	112.375	105.929	72.4042	41.8777	29.7835	25.1497	8.97366	0.782825	5.87923	2.48862	2.9089	3.96545
'sohB'	158.556	150.696	220.773	190.835	242.94	265.396	155.116	129.166	149.333	138.118	197.224	156.855
'solA'	83.1264	86.3822	156.084	111.32	167.021	158.84	143.579	154.216	126.991	135.008	177.443	181.529
'soxR'	640.381	663.315	483.684	529.037	492.303	414.97	349.973	361.665	372.743	380.137	349.65	399.629
'soxS'	718.89	730.151	519.886	550.241	493.471	511.598	413.429	401.589	410.37	488.392	473.569	457.789
'speA'	217.052	187.897	233.236	234.303	127.31	136.338	26.28	26.616	33.5116	30.4856	43.0518	58.1599
'speB'	187.804	135.563	172.702	178.643	90.5183	89.3477	20.5112	12.5252	12.3464	20.5311	23.853	23.3521
'speC'	237.064	232.034	216.026	226.882	216.66	232.966	231.392	235.63	311.599	260.061	248.42	274.497
'speD'	314.033	320.308	216.619	256.567	298.419	346.801	40.3815	36.0099	44.6822	29.2413	30.2526	37.4515
'speE'	30.7876	33.418	33.8282	32.336	22.7756	19.1932	7.69171	13.308	5.87923	10.5766	6.98137	10.1339
'speF'	243.222	306.436	443.921	475.498	436.24	444.091	421.121	385.15	451.525	426.176	559.091	605.392
'speG'	203.198	255.364	411.873	285.723	413.464	422.912	537.138	601.992	649.067	651.396	788.895	714.221
'sppA'	104.678	126.105	256.382	157.439	200.308	185.976	161.526	200.403	175.201	197.223	221.077	222.506
'spr'	29.2482	34.679	15.4304	15.3728	74.1666	79.4202	142.297	119.772	185.784	191.002	219.331	218.981
'sprT'	269.391	211.227	174.482	175.992	178.701	195.903	182.678	201.186	237.521	232.064	232.712	242.774
'spy'	126.229	145.652	235.017	214.69	263.963	250.835	241.007	243.459	295.725	272.504	385.721	387.733
'sra'	203.198	226.99	521.073	322.829	517.999	534.763	465.989	498.659	612.028	554.34	578.29	512.424
'srlA'	43.1026	37.2011	25.5195	31.8059	51.3911	41.6956	40.3815	36.7928	48.2097	29.8634	38.3975	41.4169
'srlB'	120.071	191.05	126.411	166.981	161.181	215.096	168.577	144.04	182.256	183.536	185.588	192.545
'srlD'	215.513	245.906	173.295	198.257	276.811	320.99	220.496	206.666	279.264	285.569	306.598	264.804
'srlE'	294.021	255.364	175.669	205.148	270.971	261.425	224.983	191.792	266.917	232.686	250.747	256.873
'srlR'	203.198	177.178	130.565	150.548	168.773	189.947	208.317	151.868	225.763	205.311	211.768	232.199
'srmB'	43.1026	71.2496	75.3716	67.8525	49.0551	58.2415	82.0449	64.9745	79.3697	74.6586	48.8696	66.0908
'sseA'	164.713	183.483	168.547	182.354	204.396	214.434	179.473	144.04	182.844	195.357	235.039	237.486
'sseB'	78.5083	75.6633	84.8672	102.839	127.894	158.84	105.761	109.595	149.92	170.47	176.28	199.594
'ssnA'	414.093	410.473	264.691	335.552	300.171	326.946	298.054	266.16	353.342	327.253	316.489	323.845
'sspA'	6827.14	6029.73	8580.49	9399.69	2255.37	2377.97	130.759	149.52	89.9523	110.744	68.6501	96.052
'sspB'	0	0	0	0	0	0	0	0	0	0	0	0
'sstT'	705.035	597.109	359.647	416.657	407.041	414.309	264.082	269.292	306.308	259.439	314.743	340.588
'ssuB'	16.9332	34.0485	44.5108	33.9262	30.9514	43.0193	33.9717	43.0554	56.4406	42.9287	65.7412	55.5163
'ssuC'	83.1264	95.2096	122.256	159.029	164.685	155.531	142.297	140.908	174.025	128.786	200.714	182.851
'ssuD'	153.938	175.917	282.495	252.857	285.571	300.473	248.058	257.549	289.258	284.325	346.159	348.959
'ssuE'	181.647	262.299	414.247	365.237	341.05	371.951	375.612	331.135	357.457	410.622	497.422	457.789
'stfE'	87.7445	131.78	200.595	187.124	153.005	197.227	167.936	147.171	157.563	186.646	271.692	234.843
'stfQ'	106.217	112.234	251.634	178.643	230.092	182.666	216.009	275.554	258.098	253.217	264.128	207.966
'stfR'	244.761	273.018	486.058	380.61	426.896	440.782	469.194	452.473	475.042	548.741	606.797	546.351
'sthA'	483.365	331.027	337.688	407.115	189.213	235.613	251.263	205.883	196.366	237.041	222.822	245.858
'stpA'	224.749	339.854	198.221	200.907	325.282	319.666	357.024	314.696	345.699	368.938	327.542	330.895
'sucB'	141.623	136.824	207.717	202.497	164.685	167.444	76.9171	66.5401	59.3803	68.437	67.4866	61.6847
'sucC'	144.702	178.439	148.963	151.078	217.244	236.275	291.003	302.953	351.578	334.097	426.445	405.797
'sucD'	89.2839	95.2096	48.6651	71.0331	106.87	128.396	156.398	170.656	214.004	187.269	218.75	257.754
'sufA'	90.8233	114.756	307.421	226.882	164.685	188.623	201.907	222.322	194.603	183.536	278.673	305.78
'sufB'	100.06	141.238	293.771	203.557	204.396	230.98	236.52	227.802	222.823	191.624	300.781	381.564
'sufC'	90.8233	109.712	237.391	162.74	153.589	199.212	230.751	198.838	199.306	192.246	319.979	281.547
'sufD'	101.599	157.001	312.169	182.354	226.004	233.628	276.902	257.549	220.471	214.643	329.288	319.879
'sufE'	155.477	174.026	366.769	228.472	273.307	253.483	339.076	270.857	258.098	235.797	357.795	348.519
'sufI'	571.109	493.072	368.549	374.249	374.921	342.169	177.55	178.484	219.883	197.223	273.437	248.942
'sufS'	140.083	147.543	257.569	162.74	188.045	195.241	245.494	227.802	221.059	218.376	288.563	270.972
'sulA'	53.8782	47.2896	73.5912	55.6602	85.2624	76.7728	53.201	50.1008	71.7266	62.2155	79.7039	67.4126
'surA'	546.479	600.893	331.754	408.175	443.248	436.149	284.593	353.054	520.9	404.401	250.166	278.463
'surE'	187.804	227.62	163.206	160.089	183.957	204.507	168.577	177.701	160.503	169.848	183.261	172.717
'syd'	629.606	643.768	476.562	460.125	595.669	617.492	493.551	489.266	572.049	501.457	526.511	469.685
'tag'	609.594	590.174	340.656	419.837	384.849	391.144	338.435	337.397	329.825	355.25	249.002	289.037
'talA'	354.057	469.112	370.33	490.87	561.798	572.487	387.79	309.216	392.145	438.619	522.439	537.538
'talB'	982.123	919.939	643.923	825.362	676.844	575.796	372.407	366.362	418.014	470.971	555.6	500.528
'tam'	192.422	262.299	482.497	330.251	463.104	487.11	449.324	475.175	602.621	544.385	501.495	552.078
'tap'	53.8782	90.1654	124.037	109.2	128.478	133.691	126.272	110.378	173.437	139.985	216.422	236.605
'tar'	52.3389	73.1412	98.5172	93.8273	105.118	104.57	114.735	105.681	125.816	103.278	224.567	216.337
'tas'	531.085	510.727	379.825	356.756	481.207	497.7	414.711	339.746	475.042	526.965	447.971	404.476
'tatA'	948.257	588.282	695.555	931.382	374.337	358.053	285.234	235.63	226.938	262.549	353.723	306.221
'tatB'	66.1933	53.5948	48.6651	60.9612	32.1194	21.8405	15.3834	10.9595	15.286	13.0653	20.3623	17.6242
'tatE'	112.375	150.696	140.654	132.524	265.715	197.889	161.526	169.09	216.356	176.07	196.642	228.674
'tauA'	330.966	398.493	255.789	314.348	440.328	395.115	309.591	300.605	335.704	345.918	336.851	370.99
'tauB'	343.281	350.573	251.634	257.097	435.656	432.178	284.593	351.488	396.848	386.358	300.781	388.614
'tauC'	566.491	681.6	481.31	526.387	838.025	814.057	578.801	600.427	683.755	749.697	581.781	650.333
'tauD'	417.171	551.711	281.902	350.925	609.685	596.975	393.559	412.549	487.388	411.866	411.319	431.353
'tbpA'	235.525	220.685	182.197	216.28	227.756	228.995	137.81	113.51	121.112	145.584	181.516	184.614
'tdcA'	301.718	273.018	170.328	141.536	151.837	163.473	114.735	123.686	110.53	129.408	99.4845	89.8835
'tdcB'	198.58	195.463	110.98	116.091	81.1745	98.6134	11.5376	23.4847	2.93962	8.08801	3.49068	6.16847
'tdcC'	286.324	279.324	224.928	245.965	222.5	191.932	205.753	204.317	223.999	253.839	253.656	236.164
'tdcF'	247.84	238.339	145.995	143.656	143.661	178.695	145.502	155.782	136.398	151.806	167.553	161.702
'tdcG'	300.179	283.737	178.043	198.257	221.332	199.874	173.063	176.918	225.175	197.223	208.277	207.525
'tdcR'	287.864	378.316	237.391	254.977	227.172	254.806	160.885	185.529	233.406	232.686	262.383	242.333
'tdh'	1651.75	1299.52	1035.02	1124.87	880.656	838.545	301.259	379.67	366.276	355.25	355.468	301.815
'tdk'	875.906	251.58	7855.86	3841.62	113.294	131.043	123.067	90.8077	71.1387	76.525	172.789	188.579
'tehA'	86.2052	134.302	259.349	177.053	242.94	225.024	307.668	306.085	380.386	353.384	358.959	304.018
'tehB'	106.217	132.411	295.552	217.87	239.436	231.642	251.904	256.767	313.363	329.12	308.926	318.558
'tesA'	575.727	576.933	480.123	522.676	741.082	763.096	391.636	462.649	535.01	489.014	459.607	469.685
'tesB'	412.553	573.78	420.182	497.762	693.195	726.695	437.787	417.246	545.593	538.164	457.861	434.437
'tfaD'	486.443	629.897	478.343	395.983	757.434	731.989	411.507	432.902	477.394	543.141	524.766	519.474
'tfaE'	178.568	191.05	290.804	260.808	277.979	270.69	224.983	304.519	288.082	245.129	400.847	350.722
'tfaS'	206.277	239.6	288.43	236.954	298.419	328.932	244.212	258.332	291.022	339.074	368.849	356.89
'tgt'	506.455	531.535	392.288	480.268	511.575	544.028	343.563	304.519	385.678	386.98	467.17	438.402
'thiC'	307.876	203.03	254.602	326.01	163.517	149.575	0	1.56565	2.35169	0.622155	0.581781	0
'thiD'	180.107	250.95	340.656	306.396	318.274	346.801	1.92293	0	2.93962	2.48862	0	0.440605
'thiE'	509.534	375.794	369.143	593.179	261.043	260.101	1.28195	3.1313	2.35169	4.97724	2.9089	0
'thiF'	303.257	200.508	301.486	449.523	167.605	180.019	4.48683	1.56565	1.76377	0	2.32712	1.32182
'thiG'	358.675	323.461	318.104	407.645	210.82	202.521	22.4342	18.7878	19.4015	19.909	9.89027	22.0303
'thiH'	352.518	274.91	274.78	380.61	181.621	219.067	39.7405	36.0099	16.4619	27.997	16.8716	20.7084
'thiI'	238.604	248.428	299.706	386.441	379.593	342.169	16.0244	13.308	29.9841	27.997	2.9089	3.08424
'thiM'	78.5083	75.6633	128.191	128.284	181.037	209.802	222.419	228.585	236.933	250.728	336.851	353.806
'thiP'	198.58	274.91	186.352	243.845	239.436	276.647	110.248	90.0249	144.629	153.05	153.59	172.717
'thiQ'	341.742	380.839	227.895	343.503	313.602	382.541	225.624	159.696	250.455	238.285	289.727	248.942
'thiS'	549.558	399.124	465.286	600.601	283.819	332.241	7.69171	14.8737	7.643	11.1988	15.1263	12.7776
'thrA'	381.766	399.124	267.065	329.721	256.371	285.251	185.883	174.57	218.707	216.51	273.437	226.031
'thrB'	406.396	322.199	225.521	230.062	255.787	252.159	177.55	177.701	206.361	223.976	272.855	246.739
'thrC'	491.062	556.756	318.104	421.958	388.353	371.951	255.749	214.494	289.846	279.97	319.979	338.385
'thrL'	646.539	569.997	323.445	412.946	393.025	349.449	252.545	213.711	253.983	233.308	281.582	224.268
'tiaE'	814.331	794.464	471.221	539.639	544.862	426.883	322.411	388.281	442.706	387.602	367.685	351.162
'tig'	157.017	175.917	102.078	100.719	373.753	412.323	271.774	266.16	319.83	322.898	321.143	272.294
'tktB'	278.627	332.918	323.445	365.767	476.535	430.854	291.644	260.681	346.875	352.14	339.76	392.139
'tldD'	480.286	379.577	366.769	467.546	324.114	320.99	162.167	176.918	198.13	193.49	240.857	236.164
'tolA'	66.1933	95.2096	70.6238	77.9243	160.597	170.092	75.6352	64.9745	84.073	59.7269	52.3603	52.432
'tolB'	40.0238	69.358	47.4782	33.3961	106.87	96.6279	114.094	111.161	124.64	83.3687	102.975	99.5768
'tolC'	4.61813	5.04422	22.5521	25.9748	10.5118	10.5894	0	1.56565	0	1.24431	0.581781	0
'tolQ'	112.375	145.021	88.4281	87.9962	226.588	275.985	139.092	129.949	112.881	108.877	101.23	92.9677
'tolR'	83.1264	129.889	52.226	67.8525	219.58	176.71	83.9678	103.333	109.354	79.0137	71.559	100.017
'tonB'	115.453	125.475	214.245	142.066	179.869	184.652	95.5054	78.2825	57.6165	70.9256	31.9979	25.1145
'topB'	100.06	99.6233	116.915	91.7069	171.109	150.898	165.372	166.742	209.301	128.786	230.967	247.62
'torA'	209.355	327.244	340.656	302.686	433.904	504.318	411.507	362.448	421.541	461.017	452.044	433.996
'torC'	53.8782	41.6148	71.2173	72.0933	71.8307	73.4637	99.3513	61.8432	81.7213	95.8118	111.12	82.8338
'torD'	0	0	0	0	0	0	0	0	0	0	0	0
'torI'	241.682	296.348	346.591	291.554	348.642	333.565	274.979	263.812	319.242	317.921	438.663	416.813
'torR'	161.635	194.833	209.497	287.843	327.618	273.338	248.058	239.544	263.39	230.819	289.145	303.136
'torS'	229.367	284.368	359.647	286.253	432.152	475.197	357.665	328.004	368.04	315.432	422.373	441.927
'torT'	63.1145	68.097	78.9325	56.7204	77.6706	103.908	74.9942	61.0603	108.178	76.525	96.5756	97.8144
'torY'	352.518	324.722	780.422	642.478	708.379	641.318	657.641	603.558	691.986	690.592	1111.78	1028.37
'torZ'	363.293	570.627	950.157	735.775	964.75	921.274	810.194	819.618	924.216	969.939	1327.62	1243.39
'tpiA'	12.315	10.719	15.4304	9.54176	4.08793	6.61835	0	0	0	0	0	0
'tpr'	140.083	166.459	280.715	196.666	217.244	261.425	149.347	159.696	178.729	175.448	276.346	256.873
'treA'	115.453	135.563	217.806	179.173	242.94	218.405	181.396	158.131	204.009	192.246	305.435	268.329
'treB'	503.377	425.606	357.273	462.775	344.554	297.826	286.516	266.16	361.573	310.455	371.758	387.292
'treC'	177.028	186.006	117.508	129.874	207.316	258.777	291.644	288.862	349.814	376.404	417.718	372.752
'treF'	449.498	394.71	275.373	294.734	311.266	278.632	245.494	289.645	300.429	292.413	200.133	202.238
'treR'	334.045	324.091	225.521	269.29	232.428	262.087	214.727	185.529	235.757	251.973	238.53	237.046
'trg'	106.217	100.884	223.147	185.004	210.236	219.067	215.368	194.141	335.704	266.282	264.71	252.907
'trkA'	541.861	346.79	423.743	562.434	227.756	234.29	120.503	108.03	95.2436	111.366	70.3955	58.6005
'trkD'	289.403	192.311	174.482	314.878	144.829	140.971	99.9922	130.732	118.761	116.343	146.609	153.771
'trkG'	81.587	90.7959	201.782	117.682	183.957	154.869	184.601	162.045	182.844	213.399	219.913	238.367
'trkH'	437.183	387.774	249.854	404.995	188.045	195.903	105.12	119.772	109.354	137.496	90.7578	100.017
'trmA'	518.77	472.896	404.158	548.121	245.86	340.845	219.855	210.58	190.487	188.513	215.259	202.678
'trmC'	63.1145	76.9243	107.419	107.61	150.085	107.217	126.913	140.908	141.69	131.897	186.17	211.931
'trmE'	13.8544	25.8516	18.3978	20.1437	2.91995	3.97101	7.69171	11.7424	7.643	4.97724	8.14493	12.7776
'trmH'	741.98	648.182	485.464	544.41	499.895	523.511	303.823	281.817	338.644	287.436	311.834	338.825
'trmU'	26.1694	18.9158	128.191	110.79	22.1916	15.2222	8.97366	7.82825	15.286	16.7982	27.3437	25.5551
'trpA'	113.914	206.813	289.023	194.546	182.205	246.864	0	0	0	0	0	0
'trpB'	110.835	104.037	183.384	128.284	167.605	152.222	0	0	0	0	0	0
'trpC'	135.465	107.82	213.652	166.981	174.613	158.84	3.20488	0.782825	19.9894	11.1988	1.74534	1.76242
'trpD'	178.568	177.809	365.582	291.024	253.451	260.101	13.4605	15.6565	18.8135	15.5539	12.2174	8.3715
'trpE'	164.713	159.523	312.169	229.002	224.836	193.918	1.28195	0	1.76377	0	0	0
'trpL'	104.678	180.961	271.813	217.87	195.636	223.038	85.2498	78.2825	111.705	100.789	83.1946	96.052
'trpR'	317.112	255.994	178.637	222.111	187.461	211.787	194.216	185.529	216.356	209.044	276.346	281.987
'truA'	15.3938	2.52211	7.7152	0.530098	5.2559	9.92752	10.8966	6.2626	5.29131	3.73293	11.0538	0.440605
'truB'	175.489	136.824	143.028	194.546	94.6063	91.995	80.122	72.8027	84.073	79.0137	119.847	119.845
'truD'	334.045	321.569	254.008	276.181	340.466	383.202	271.774	219.974	350.99	331.609	295.545	308.424
'trxA'	12.315	8.82738	17.2108	19.0835	8.75984	13.8985	46.1503	68.1058	67.0233	54.1275	54.6874	61.2441
'trxB'	1.53938	2.52211	14.2435	6.36117	8.75984	7.28018	60.8927	64.1916	97.5953	100.789	89.5942	81.512
'trxC'	76.9689	92.6875	90.2085	86.936	103.366	99.2752	93.5825	74.3684	92.8919	85.8574	115.193	123.369
'tsgA'	303.257	269.235	204.156	224.231	153.589	144.942	159.603	135.429	183.432	185.402	178.025	223.387
'tsr'	281.706	276.171	169.734	177.583	179.869	211.787	157.039	143.257	209.301	204.067	205.369	213.253
'ttdA'	412.553	316.525	202.376	263.459	272.723	260.101	183.96	180.05	266.917	222.731	224.567	280.225
'ttdB'	572.649	533.426	348.371	370.008	361.489	403.719	281.388	293.559	332.177	306.1	346.159	344.994
'tus'	101.599	131.15	322.258	221.581	203.228	204.507	236.52	277.12	271.033	268.149	338.015	293.884
'tynA'	286.324	307.067	673.597	414.006	602.093	583.076	552.521	610.603	769.592	688.725	712.099	679.413
'tyrA'	90.8233	144.391	119.882	85.3457	153.589	172.077	125.631	120.555	144.629	167.36	187.333	156.855
'tyrB'	705.035	612.242	475.375	494.051	462.52	475.859	355.101	349.14	348.639	426.798	419.464	410.644
'tyrP'	89.2839	106.559	202.969	138.886	188.045	194.579	201.907	183.181	239.873	217.132	285.654	306.661
'tyrR'	183.186	253.472	304.454	244.375	339.298	336.874	360.228	315.478	321.006	331.609	339.178	321.201
'ubiB'	36.9451	49.1811	5.93477	18.0233	5.83989	10.5894	8.33269	5.47977	1.76377	3.73293	4.07246	3.96545
'ubiC'	1039.08	1049.83	619.59	795.677	725.315	751.183	445.478	447.776	511.493	486.525	517.203	484.666
'ubiD'	803.555	375.794	1259.36	1525.62	406.457	446.739	80.122	77.4997	144.629	108.877	91.9213	107.067
'ubiF'	269.391	197.986	286.649	253.387	21.0236	26.4734	19.8703	13.308	9.9947	13.6874	12.2174	34.8078
'ubiG'	137.005	111.603	204.156	201.967	128.478	144.28	296.772	262.246	328.649	284.947	318.234	344.113
'ubiH'	84.6658	49.1811	46.2912	22.7942	0	2.64734	5.76878	0.782825	0	1.24431	4.07246	2.20303
'ubiX'	20.0119	16.3937	41.5434	21.2039	1.75197	1.9855	3.84586	3.91412	5.29131	3.73293	3.49068	6.16847
'ucpA'	309.415	392.819	364.395	340.853	468.359	493.729	288.439	383.584	367.452	372.049	450.88	446.333
'udk'	294.021	113.495	1166.78	922.37	220.748	270.69	297.413	344.443	292.198	289.924	300.781	339.266
'udp'	643.46	662.054	300.893	424.078	126.142	176.048	128.195	125.252	135.222	166.737	126.828	118.523
'ugd'	32.3269	56.1169	97.9237	60.4311	89.9344	148.251	69.8664	65.7573	53.501	65.9484	128.574	132.622
'ugpA'	344.821	245.906	212.465	272.47	186.293	217.744	162.167	204.317	223.999	226.464	223.986	215.015
'ugpB'	663.472	611.612	479.529	566.674	397.113	367.318	430.095	366.362	416.838	469.105	443.317	392.579
'ugpC'	381.766	301.392	317.51	278.831	225.42	220.391	230.751	229.368	303.956	274.992	243.766	218.54
'ugpE'	472.589	322.83	295.552	371.068	276.811	289.222	214.086	250.504	283.379	251.973	253.075	269.65
'ugpQ'	561.873	557.386	417.808	478.678	389.521	424.236	278.184	314.696	328.061	295.524	332.197	315.914
'uhpA'	966.729	779.332	608.314	741.076	659.908	626.758	358.306	313.913	360.985	345.296	370.594	376.277
'uhpB'	560.334	454.61	356.086	433.62	292.579	320.99	193.575	181.615	169.91	186.024	196.06	186.817
'uhpC'	1059.09	750.328	557.868	709.801	572.894	607.564	310.873	336.615	370.392	410.622	311.834	348.519
'uhpT'	1294.62	1031.54	727.603	970.079	749.842	755.815	351.255	342.094	373.919	390.091	365.94	443.249
'uidA'	89.2839	112.864	197.628	151.078	118.55	149.575	212.804	175.353	218.707	223.976	226.313	261.72
'uidB'	72.3508	63.0527	153.117	88.5263	91.6863	127.072	134.605	161.262	186.96	184.78	167.553	218.981
'uidC'	110.835	148.174	303.267	156.379	210.82	240.908	277.543	320.958	313.363	268.771	368.849	328.251
'ulaA'	447.959	353.726	284.869	368.948	208.484	219.067	196.139	218.408	273.972	257.572	280.418	312.83
'ulaB'	546.479	377.686	394.662	445.812	258.123	275.323	246.776	259.898	289.846	285.569	351.395	355.128
'ulaC'	257.076	261.038	202.969	240.664	160.597	141.633	173.063	171.439	178.729	155.539	180.352	218.981
'ulaD'	832.804	536.579	496.147	636.647	332.874	384.526	414.07	351.488	429.772	417.466	478.805	490.834
'ulaE'	412.553	306.436	285.462	271.94	228.924	222.377	233.956	219.974	214.004	233.308	296.126	266.126
'ulaF'	581.885	510.727	384.573	506.773	351.562	358.714	293.567	299.822	366.864	337.208	451.462	390.817
'ulaG'	578.806	496.225	434.425	536.989	327.618	361.362	394.2	334.266	380.386	382.003	439.244	420.778
'ulaR'	317.112	262.299	221.367	279.892	108.622	136.338	169.218	139.343	184.608	132.519	219.913	238.808
'umuC'	116.993	133.672	207.124	142.066	179.869	163.473	157.039	167.525	174.025	161.138	235.621	211.05
'umuD'	110.835	100.254	194.067	182.884	172.861	135.014	177.55	129.166	165.794	146.829	249.002	274.938
'ung'	66.1933	61.7917	58.1608	58.8408	109.79	122.439	94.2235	92.3733	94.0677	87.1017	112.284	118.523
'upp'	338.663	453.349	288.43	230.062	173.445	193.256	182229	196375	84413.4	95700.5	283.909	266.126
'uraA'	120.071	109.712	143.028	161.68	160.597	124.425	3256.8	3293.34	473.866	530.076	170.462	174.48
'usg'	129.308	122.953	179.824	150.548	185.125	283.265	200.625	201.186	218.707	219.621	300.199	314.592
'ushA'	498.758	567.475	407.125	561.373	794.81	777.656	501.884	515.882	570.286	566.161	518.367	526.964
'uspA'	695.799	631.788	500.895	556.602	487.047	501.671	351.255	390.63	416.838	441.73	385.139	373.193
'uspE'	175.489	222.576	413.06	272.47	333.458	362.024	339.717	293.559	333.94	372.671	494.514	416.372
'uspF'	132.387	206.182	365.582	239.074	300.755	350.772	321.77	317.827	379.798	378.892	397.356	408.001
'uspG'	73.8901	129.889	123.443	120.332	183.373	175.386	128.195	90.0249	184.02	164.871	150.099	162.143
'uup'	4.61813	27.7432	45.1043	36.5767	34.4554	34.4154	32.0488	34.4443	39.3909	51.0167	18.617	31.7236
'uvrA'	444.88	473.526	280.121	324.95	309.514	322.314	257.672	217.625	268.093	270.015	285.654	282.869
'uvrB'	96.9808	112.234	107.419	142.596	153.005	170.092	119.862	145.605	143.453	152.428	193.733	223.387
'uvrC'	61.5751	64.3138	147.182	122.983	87.0144	115.821	116.658	111.944	112.293	102.656	158.826	186.817
'uvrD'	0	0	0	0	0	0	0	0	0	0	0	0
'uvrY'	64.6539	81.9686	122.256	83.7554	157.677	134.352	121.785	115.075	149.333	132.519	165.226	172.717
'uxaA'	815.87	776.81	450.449	618.624	561.214	538.072	348.691	374.973	431.536	393.824	394.447	465.72
'uxaB'	133.926	162.046	306.234	182.354	269.219	254.145	328.18	332.701	395.084	370.182	350.232	329.132
'uxaC'	680.405	620.439	404.158	474.967	416.384	372.613	316.642	281.034	378.623	341.563	377.576	419.016
'uxuA'	244.761	248.428	186.352	214.159	203.812	173.401	133.323	161.262	184.608	182.291	189.66	189.46
'uxuB'	0	0	0	0	0	0	0	0	0	0.622155	0	0
'uxuR'	112.375	118.539	105.045	102.309	84.6785	74.7873	86.5317	77.4997	87.0127	70.9256	91.3396	89.8835
'vacJ'	238.604	313.372	274.186	254.977	374.921	366.656	273.697	302.17	322.182	274.992	358.377	341.91
'visC'	286.324	266.713	335.315	318.059	92.2703	81.4057	57.6878	61.0603	53.501	51.6388	58.7598	73.5811
'vsr'	155.477	201.769	354.306	297.915	395.945	344.154	239.084	240.327	252.219	306.722	402.592	445.011
'wbbH'	160.095	194.833	446.295	316.998	457.848	442.768	278.825	266.943	293.374	296.146	554.437	535.335
'wbbI'	157.017	170.242	319.884	253.917	357.985	344.816	261.518	254.418	246.928	266.282	492.768	454.264
'wbbJ'	103.138	121.061	298.519	222.641	310.682	353.42	185.883	194.141	192.839	232.686	381.066	377.158
'wbbK'	137.005	162.046	275.373	225.291	319.442	357.391	212.163	179.267	248.692	194.734	408.992	396.545
'wcaA'	180.107	174.026	305.641	251.796	322.946	299.811	254.467	224.671	326.885	256.328	475.315	475.854
'wcaB'	161.635	174.656	280.715	212.039	293.747	283.265	255.108	242.676	256.923	265.038	434.59	423.422
'wcaC'	147.78	161.415	293.771	244.905	310.098	298.488	258.313	223.888	277.5	281.214	401.429	414.61
'wcaD'	444.88	508.836	781.609	619.154	935.551	896.786	570.469	515.882	680.815	607.845	1124	1112.97
'wcaE'	133.926	230.142	334.128	280.952	403.537	389.821	310.232	250.504	318.654	300.501	502.077	579.396
'wcaF'	203.198	288.151	491.399	365.237	445	412.323	469.194	360.882	434.475	447.951	806.348	796.174
'wcaI'	187.804	204.291	366.175	336.612	376.673	397.763	265.364	219.191	287.495	278.725	502.077	525.642
'wcaJ'	110.835	160.154	273.593	207.268	282.067	278.632	204.471	162.045	215.18	235.175	392.12	390.817
'wcaK'	96.9808	97.1012	160.239	146.837	183.957	201.86	145.502	126.035	135.222	134.385	253.656	232.199
'wcaL'	157.017	208.705	331.16	240.134	401.785	395.115	232.033	244.241	271.033	266.904	477.06	467.923
'wcaM'	0	0	0	0	0	0	0	0	0	0	0	0
'wrbA'	69.272	78.1854	97.9237	86.4059	154.173	119.792	78.1991	115.075	108.178	91.4568	133.228	91.2053
'wza'	261.694	286.89	414.247	351.985	412.88	454.019	365.997	301.388	385.678	354.628	588.18	585.564
'wzb'	166.253	224.468	303.86	244.905	363.825	305.106	214.086	205.1	256.923	245.751	433.427	405.357
'wzc'	138.544	203.66	371.517	280.952	343.97	334.227	249.34	241.11	313.951	286.191	513.712	471.888
'wzxC'	123.15	109.712	201.189	186.064	220.748	222.377	126.913	145.605	159.915	139.363	307.18	270.972
'wzxE'	112.375	62.4222	31.4543	71.5632	52.559	58.9033	130.759	96.2875	103.475	111.988	134.391	154.212
'wzzE'	477.207	262.93	401.784	568.795	211.404	237.599	253.826	176.136	199.306	223.354	283.909	270.091
'xapA'	192.422	250.319	270.626	276.711	354.482	399.086	246.776	234.065	272.796	316.055	390.375	344.994
'xapB'	260.155	247.167	299.706	307.987	388.353	383.864	229.469	264.595	286.907	270.015	397.938	369.668
'xapR'	93.9021	104.037	119.882	122.453	147.749	164.135	99.9922	127.6	128.167	123.809	137.3	163.024
'xdhA'	478.747	497.486	356.68	341.913	429.816	406.367	293.567	310.781	326.297	370.804	341.505	364.821
[truncated: 1,681 more rows]

## Sheet: poor-5FU - log2 and pval
Gene name	log2FoldChange	FDR adj pval
upp	9.75599	6.90022e-169
uraA	4.57059	6.90022e-169
hflD	5.41801	3.58776e-169
rfaF	2.01259	2.2138e-113
rfaC	2.29734	2.10364e-99
pepA	1.89738	1.53503e-73
rfaD	2.349	6.97161e-72
pykF	1.4152	7.34332e-66
rfaG	1.31071	2.09514e-52
ppc	2.67844	9.89694e-48
yjjG	-3.83297	1.04048e-40
rfaE	1.8003	1.51961e-39
fruK	1.65816	1.81996e-27
lpcA	2.12764	3.3222e-27
deoB	1.08082	3.05777e-26
sodA	2.79384	7.20272e-23
fepG	4.64938	1.36356e-22
gmhB	1.81601	3.20948e-21
purR	-1.22058	1.44676e-20
yahO	0.981609	8.03504e-20
atpG	1.53785	1.59699e-19
cytR	1.21704	3.12817e-17
apaH	1.03579	1.38622e-16
pabB	1.50599	3.20039e-16
yahM	0.992193	1.3473e-15
exbD	1.73825	1.59228e-15
yahJ	1.12363	2.77395e-15
prpB	0.905101	1.92638e-14
rpoZ	0.865512	2.80034e-14
nadB	4.60693	3.87913e-14
prpE	0.824358	3.87913e-14
yahF	1.01211	1.13316e-13
eda	1.26245	1.52486e-13
rfaH	1.01243	5.70291e-13
prpR	1.04489	7.47694e-13
yahC	0.809521	1.00423e-12
plsB	2.03539	1.11695e-12
sapC	1.2477	1.20683e-12
wcaD	-0.715878	1.47129e-12
phoR	1.01957	8.98797e-12
yeeA	-0.95152	1.21017e-11
nupC	0.803649	1.45852e-11
exbB	1.46863	5.95612e-11
aspC	1.85973	7.67736e-10
yefM	-0.987637	7.67736e-10
pitA	0.964283	8.31293e-10
ycdC	-1.35255	1.33558e-09
tonB	1.94144	2.1392e-09
sapD	1.15095	3.29482e-09
gpt	1.23156	6.4529e-09
yhhF	1.07617	7.68945e-09
yeeF	-0.877616	8.29453e-09
yeeS	-0.843693	1.10306e-08
ftsX	2.00582	1.26997e-08
gntY	1.88606	1.59294e-08
galF	-0.849552	1.64605e-08
hisF	-0.915751	2.31824e-08
aroB	3.88792	4.33055e-08
crr	-1.55482	5.24636e-08
dcd	-1.46295	5.24636e-08
pyrI	-1.43193	5.24636e-08
yeeD	-0.999159	5.8457e-08
sapF	1.62302	7.26423e-08
znuB	-0.70198	7.92089e-08
yoeF	-1.01117	9.3184e-08
yidH	0.754122	1.00422e-07
betB	0.701931	1.45249e-07
rfaQ	0.640618	1.47233e-07
wcaI	-0.75726	1.79005e-07
wcaF	-0.620313	1.90204e-07
mntH	0.701689	2.01672e-07
secG	1.643	2.38693e-07
rhlB	1.01901	2.61043e-07
sbmC	-0.782048	2.61199e-07
yeeW	-0.77281	2.9114e-07
ptsN	0.913319	3.24118e-07
rnhA	1.4857	3.42484e-07
kbl	0.739213	3.93848e-07
iscA	1.26297	4.26091e-07
dnaB	1.78168	5.21451e-07
nadC	4.03667	6.53254e-07
dsbB	1.20033	7.21691e-07
hisH	-0.765946	8.63066e-07
cpxA	1.20133	9.34876e-07
nac	-0.918208	1.03239e-06
yahI	0.671194	1.24355e-06
rfbX	-0.708649	1.30667e-06
cpsB	-0.721038	1.37447e-06
hupB	0.674436	1.53842e-06
yeeR	-0.833975	1.87336e-06
wbbH	-0.671918	2.26979e-06
sixA	0.706828	2.32681e-06
clpX	0.800674	2.64142e-06
cobS	-0.818735	2.78514e-06
sapB	1.07378	3.40337e-06
wcaJ	-0.765935	3.45517e-06
wzc	-0.680661	4.77699e-06
sbcB	-0.683762	8.4006e-06
pabA	1.62988	8.41274e-06
rnc	8.09298	8.41274e-06
yeeU	-0.722285	8.41274e-06
yeeN	-0.737284	9.76171e-06
yhiN	0.576733	9.76171e-06
yahE	0.611257	1.01532e-05
yidG	0.614043	1.06424e-05
sspA	1.08157	1.09025e-05
rbbA	0.655067	1.20486e-05
wcaL	-0.664614	1.22544e-05
wcaA	-0.662501	1.23533e-05
wbbK	-0.713056	1.26362e-05
cobU	-0.730041	1.37892e-05
dacD	-0.751781	1.37892e-05
rfbB	-0.734486	1.37892e-05
wcaE	-0.621243	1.49069e-05
ybaD	0.647319	1.49069e-05
yiaN	0.695892	1.87569e-05
nudD	-0.552732	1.97421e-05
yicC	0.499434	2.01093e-05
yoeB	-0.782974	2.16608e-05
trkA	1.15615	2.35045e-05
yhhH	0.729162	2.36272e-05
wzb	-0.674477	2.65824e-05
hisA	-0.619232	2.78215e-05
ycgL	-0.630219	2.83839e-05
rfaI	0.484017	3.12368e-05
hdeA	0.705632	3.18221e-05
secB	0.923767	3.18221e-05
treF	0.734064	3.19723e-05
tag	0.650719	3.55202e-05
yebU	-0.463886	3.55202e-05
npr	-0.800498	3.63376e-05
yedI	-0.736984	3.66843e-05
acnB	1.12859	3.81088e-05
xylF	0.509184	3.98244e-05
ycfL	-0.580819	3.98422e-05
proC	0.497967	4.19308e-05
hscA	1.05455	4.35968e-05
torY	-0.43632	4.69711e-05
yeeX	-1.22195	4.96562e-05
yeeV	-0.775105	5.12113e-05
cld	-0.694905	5.65894e-05
yhiP	0.532101	6.00295e-05
wbbJ	-0.672685	6.77085e-05
dhaK	-0.801918	8.0928e-05
shiA	-0.674373	8.84818e-05
wzxC	-0.761633	9.65987e-05
ygeH	0.49784	0.000112631
cheR	-0.420524	0.000118356
hisC	-0.645301	0.000125751
dcm	-0.688114	0.000133942
gadW	0.699613	0.000138869
yfgL	0.777023	0.000142906
yjgF	0.784042	0.000155891
emrD	0.721901	0.000163452
hisI	-0.730682	0.000163452
ptsP	-0.632342	0.000163452
yoeA	-0.644728	0.000163452
rfaS	0.535733	0.000165546
yeeZ	-0.691056	0.000201083
atpC	0.798738	0.000202158
rnb	0.933431	0.000210627
metL	-0.625847	0.000214293
yhiL	0.532623	0.000228616
yhjD	0.615713	0.000278192
clpA	-0.719075	0.000299948
dadA	-0.627916	0.00033458
surA	0.59064	0.00033458
yegE	-0.547522	0.000357471
cobT	-0.629585	0.000363375
yedV	-0.635034	0.000363375
erfK	-0.645755	0.000379566
wbbI	-0.5501	0.000394618
xylA	0.559852	0.000402296
yhjA	0.648595	0.000406588
mdtC	-0.520507	0.000409791
yeeT	-0.665425	0.000419674
nuoH	-0.467611	0.000496378
yiaM	0.518985	0.000519041
yegL	-0.557105	0.000548784
pgi	0.951874	0.000561812
yhiD	0.591939	0.000561812
rfbA	-0.851341	0.000599009
yedK	-0.570775	0.000617421
dinD	0.470759	0.00062449
wza	-0.486901	0.00065016
yiaV	0.515364	0.00067334
glf	-0.744016	0.000893338
ycbJ	-1.22707	0.00092791
yagL	0.631084	0.000934656
yoeE	-0.603591	0.00100244
minE	-0.762862	0.00100859
torZ	-0.332358	0.00107114
arsR	0.524709	0.00107764
astA	-0.533113	0.00107764
ndk	1.22415	0.00113438
yhjX	0.541324	0.00113458
yecM	-0.341979	0.00116617
intF	0.592709	0.00118182
ylbF	0.507386	0.00118984
aroL	0.510826	0.00124037
pnp	1.11547	0.00124037
rfaL	0.500256	0.00124037
mdtA	-0.469532	0.00125951
ycfZ	-0.623056	0.00130664
dppF	0.62876	0.00132453
hdeD	0.610752	0.00140435
apaG	-0.411856	0.00144192
pykA	-0.36398	0.00144192
yeeE	-0.701085	0.00144192
ymfO	-0.68176	0.00149858
flu	-0.598001	0.00152287
gor	0.420186	0.00152287
selB	0.536509	0.00152519
fnr	0.507503	0.00156271
prpD	0.527359	0.00156271
yegJ	-0.510983	0.00156271
ykfH	0.520986	0.00162069
ykgG	0.439187	0.00174827
yhbH	-0.640392	0.00175873
fldB	0.443764	0.00182007
glpG	0.466443	0.00190869
tolQ	0.797883	0.00199889
yohN	-0.476495	0.00221353
znuA	-0.637583	0.00221353
lit	-0.519526	0.0022143
ykgL	0.494832	0.00231566
yegQ	-0.452582	0.00233932
manY	-0.410258	0.00247143
yqeJ	0.400496	0.00247986
yhbG	-0.594798	0.00248778
yqaD	0.455333	0.00257841
yagV	0.500089	0.00258037
ydhB	-0.617552	0.00259736
yhiK	0.591707	0.00265534
yoaG	-0.295461	0.00274995
vsr	-0.499021	0.00275644
ygeQ	0.382031	0.00285064
yiaJ	0.465307	0.00293554
arsB	0.565842	0.0029491
mviM	-0.519054	0.0029491
yebB	-0.344264	0.0029491
ygcF	0.437475	0.00299882
yeeP	-0.643496	0.00309191
rfaJ	0.442668	0.0031802
yiaG	0.483279	0.00336501
sgrR	-0.565953	0.00338329
yqeF	0.389995	0.00339859
yjaH	0.754321	0.00351045
yiaL	0.4191	0.00356124
pphA	-0.330508	0.00366894
tar	-0.673553	0.00366894
yiaF	0.56851	0.00366894
alkA	-0.505608	0.00372276
yibD	0.411846	0.00372291
gcl	0.437049	0.00373261
yhjJ	0.499143	0.00388848
cheZ	-0.358178	0.003894
yiaW	0.534684	0.00390243
slp	0.476534	0.00392403
ddlA	0.391237	0.00402327
dsdA	0.804431	0.00402327
fdnG	0.424405	0.00402327
prlC	0.481259	0.00402327
yeeY	-0.588597	0.0041065
selA	0.490611	0.00426608
aegA	0.554426	0.00438338
aroA	2.44078	0.00459533
leuC	-0.524572	0.00459533
yaiE	0.369715	0.00459533
zur	0.520806	0.00466701
bcsF	0.512849	0.00473991
gltP	0.440612	0.0050973
gntR	0.647639	0.00514327
yiaA	0.495749	0.00522906
minD	-0.79729	0.00536996
rimI	-0.791789	0.00575978
pepT	-0.550996	0.00580754
phoA	0.485817	0.00590451
narK	-0.522395	0.00591594
yhhJ	0.459759	0.00598114
yedJ	-0.536215	0.00602603
ykfC	0.482838	0.00602603
ychQ	-0.564824	0.00603173
ychJ	-0.72131	0.00621929
wcaB	-0.459699	0.00622295
dcuA	0.573627	0.00627061
ycgK	-0.446703	0.00645066
yeeI	-0.479119	0.00645066
ackA	3.22615	0.00645685
yeaY	-0.295495	0.00645685
oppB	-0.517903	0.00654448
yegP	-0.430114	0.00654448
ycgR	-0.536475	0.00654977
ygeK	0.381991	0.00654977
yhjG	0.470848	0.00654977
ykgJ	0.476189	0.00654977
yecS	-0.55419	0.00656623
bcsG	0.50127	0.00659187
potD	-0.455897	0.00662778
yeeJ	-0.538265	0.00663292
fixA	-0.53256	0.00666453
hisD	-0.465407	0.00674463
rnd	-0.454107	0.00674463
gshA	0.526835	0.0067917
kdsD	-0.928339	0.00680722
yoaD	-0.331235	0.00680722
ytjC	-0.694814	0.00680722
fliH	-0.621668	0.00684181
ygeR	0.33095	0.00692567
bioB	6.42525	0.00695855
yiaY	0.378867	0.00701678
ybjL	-0.686463	0.00703638
ygeP	0.342295	0.00711517
mprA	0.419244	0.00716254
hscB	0.763427	0.00720617
ydeH	0.439499	0.00720617
yobB	-0.306057	0.00720617
recG	-0.430934	0.00738224
fliD	-0.661438	0.00742385
yebR	-0.373749	0.00750989
ydcQ	-0.60978	0.00761375
yeaX	-0.333703	0.00762163
tap	-0.611015	0.00773716
nadA	5.61106	0.00783297
yahB	0.366095	0.00793226
yodB	-0.468355	0.00793226
ymfN	-0.662515	0.00822131
ydeS	0.40876	0.00841856
ilvH	-0.536775	0.00854457
yhjE	0.536226	0.00854457
ymfB	-0.481084	0.00876693
ndh	-2.04322	0.0088855
ldcA	0.476648	0.00896879
yoaA	-0.304665	0.00908287
fliG	-0.531308	0.00912434
leuB	-0.491225	0.00912434
relA	1.11671	0.00919692
hyi	0.393034	0.00952781
betA	0.368252	0.00953513
yecO	-0.337311	0.00953513
frsA	0.426748	0.00985557
yicR	0.570469	0.0100426
cheY	-0.374094	0.0101934
chaA	-0.492719	0.0102231
yhiF	0.464887	0.0102544
yedQ	-0.579188	0.0104658
cyoD	0.330252	0.0106085
mdtD	-0.459652	0.0106085
rfe	-0.922474	0.0106085
thiH	1.33097	0.0106085
thiI	2.61487	0.0106085
yagB	0.644813	0.0106085
ylbG	0.357576	0.0106572
yebS	-0.298532	0.0108093
gpp	0.427613	0.0108589
dhaL	-0.541982	0.0109907
hupA	0.623863	0.0109907
yebT	-0.368066	0.0109907
rpmB	3.06216	0.0110563
yiaO	0.370253	0.0111108
eutL	-0.421857	0.0112604
baeR	-0.411066	0.0112798
lldR	0.39676	0.0112798
ychM	-0.433495	0.0112798
ypdG	-0.467541	0.0112798
mdtB	-0.469031	0.011345
flhB	-0.292354	0.0115788
fliM	-0.637445	0.0115788
sgbE	0.390115	0.0115788
yhiR	0.451522	0.0115788
holE	-0.31601	0.0121254
wcaC	-0.432496	0.0121254
ycgJ	-0.442286	0.0122255
yeaT	-0.301982	0.0122255
yeaG	-0.480142	0.012606
fliC	-0.583545	0.0127039
rhsE	0.386709	0.0131058
bcsE	0.561602	0.0132394
yahA	0.378262	0.0133366
caiT	-0.574986	0.0136358
arsC	0.51926	0.01365
tdcB	2.15561	0.0148093
ftsE	2.15677	0.0149039
ybgE	-0.401187	0.0151568
mtlA	0.402492	0.0152607
yobD	-0.3643	0.0152904
ysaB	0.33598	0.0153163
yecC	-0.579623	0.0153591
yeaS	-0.303782	0.0157748
yagY	0.409493	0.0160759
ygfY	0.605621	0.0162614
edd	-0.351116	0.0164617
yaiS	0.322428	0.0164617
yebG	-0.347404	0.0164617
xylB	0.415492	0.0164682
flhA	-0.282087	0.016749
yebZ	-0.332778	0.0168401
fliN	-0.555193	0.0168781
narW	0.348063	0.0168781
yobA	-0.349227	0.0168781
cheB	-0.355435	0.016908
proQ	0.415428	0.016908
yegD	-0.375445	0.0171802
bcsA	0.422014	0.0181976
dcrB	0.424588	0.0181976
fsr	0.380192	0.0183308
ybaK	0.386456	0.0186997
ihfB	-0.707017	0.018907
ygcI	0.422398	0.0189745
sgbH	0.340811	0.0191684
kdgK	0.431096	0.0192423
ypdI	-0.393639	0.0196561
sdhD	0.290051	0.0196644
tdcA	0.658372	0.0196644
hisB	-0.459966	0.0199199
ykgI	0.404678	0.0199199
yncI	0.377977	0.0201179
ychH	-0.488688	0.0201883
yqcA	0.405621	0.0203558
cvrA	-0.383602	0.0209737
dmsA	-0.439239	0.0209737
ygeO	0.345022	0.0216686
yhjK	0.488673	0.0217453
nikR	0.480707	0.0217775
yecE	-0.268096	0.0217775
guaC	-0.419467	0.0217934
bcsC	0.422223	0.0222129
ymgH	-0.401071	0.0222129
yegH	-0.430569	0.0222402
grxC	0.438959	0.0225119
yhhL	0.419618	0.0225202
ybbB	0.352025	0.0225326
yebW	-0.299111	0.0227533
eutA	-0.370347	0.0232963
yegR	-0.349597	0.0232963
gudP	0.35296	0.0234383
ykgC	0.389425	0.0237531
ybjS	-0.547602	0.0239533
caiA	-0.485393	0.0240751
wcaK	-0.510899	0.0240751
ydhD	0.731121	0.024094
ykgM	0.280781	0.024094
ppiD	0.367417	0.0244357
hofB	-0.495976	0.0246043
pflB	0.660998	0.0246043
ycaN	-0.456475	0.0246043
yegU	-0.439903	0.0246175
yeaW	-0.277078	0.0247264
yedA	-0.569014	0.0248718
cbl	-0.438537	0.025328
yeaP	-0.283145	0.025328
gmd	-0.484574	0.0254083
ycfX	-0.519734	0.0257456
ydeO	0.346406	0.0257456
cyoE	0.284014	0.0257457
yhjR	0.395291	0.0264467
yegK	-0.584212	0.026774
yhjB	0.417981	0.026774
miaB	-0.590561	0.0269393
yncA	0.357788	0.0269393
yjeF	1.10488	0.0269707
yodC	-0.452904	0.0269707
yohF	-0.353398	0.0277594
yibA	0.363923	0.0280513
ygeL	0.317659	0.0282707
mraW	-0.836422	0.0283678
ybcF	0.373011	0.0283678
ymfG	-0.382959	0.0283678
tdh	0.375921	0.028458
araE	0.332472	0.028722
purT	-0.296337	0.028722
hdeB	0.439255	0.0294979
dppA	0.402907	0.0302126
mmuM	0.612173	0.0302126
fliF	-0.464559	0.0302468
narV	0.347112	0.0305626
ykfA	0.452755	0.0307539
rpsT	0.990767	0.0308347
xdhB	0.34209	0.0311662
fixB	-0.486112	0.0312971
yiaB	0.354974	0.0312971
rpmE	0.856759	0.0318898
yaiY	0.331543	0.0323936
kefF	-0.554277	0.0326732
exoX	-0.297505	0.0329254
yfbV	-0.325465	0.0329254
yebV	-0.259679	0.0330621
pabC	0.704416	0.0335946
tpr	-0.462467	0.03393
yfcC	-0.477736	0.03393
ybbD	0.317546	0.0339842
ygcN	0.317756	0.0341077
yadI	-0.540628	0.0344184
cutC	-0.273346	0.0346245
ylaC	0.338525	0.0346245
yqeK	0.352505	0.0347341
yibJ	0.310074	0.0349494
ybbY	0.326262	0.0350415
ygiU	0.335712	0.0357563
yheO	-0.681833	0.0361028
mdtF	0.352031	0.0361265
sbcC	0.291763	0.0362908
yidI	0.336271	0.0365451
ypdJ	-0.364517	0.0368373
nuoJ	-0.354693	0.0373832
ppdA	0.397478	0.0376493
ykfG	0.439681	0.037961
icdC	-0.392111	0.0384349
pgm	0.674334	0.0384349
tyrR	0.360374	0.0384349
lldP	0.441696	0.0385571
rpsU	1.55418	0.0385571
yddB	0.348974	0.0385571
gatZ	-0.320031	0.0388556
smf	-0.332403	0.0388556
yeaR	-0.279153	0.0388556
yfcU	-0.367628	0.0388556
yciS	-0.54676	0.0393927
lldD	0.37581	0.039513
ydcD	0.37295	0.0396344
yqjI	-0.628811	0.0399235
ycgY	-0.328599	0.0399489
syd	0.307134	0.0403491
yedR	-0.424889	0.040604
ymfI	-0.382668	0.0407436
deoA	-0.598453	0.0407639
leuD	-0.445547	0.0427985
narG	-0.457069	0.0427985
stpA	0.354852	0.0427985
treA	-0.428056	0.0434674
lacA	0.312981	0.0444348
hipA	0.367803	0.0444794
cyoB	0.25842	0.0458253
tolA	0.750891	0.0458253
umuD	-0.443839	0.0458253
yaiW	0.332784	0.0458253
yfbU	-0.467377	0.0458253
yhiJ	0.396156	0.0458253
yibQ	0.321	0.0459154
yjbM	0.390763	0.0459154
yiaC	0.390626	0.0467899
ychN	-0.425662	0.046828
yehY	-0.384111	0.046828
ydcE	0.382813	0.0469977
yehC	-0.365547	0.04703
hchA	-0.384317	0.0472509
yegI	-0.392155	0.0472509
yddW	0.316386	0.0474911
aroM	0.278577	0.0479591
cyoC	0.252546	0.0479591
ugd	-0.620247	0.0479591
yahK	0.275833	0.0479591
yhcF	-0.347428	0.0479626
nikE	0.43644	0.0480522
rfaK	0.299016	0.0485138
ygaQ	0.424678	0.0492174
bcsZ	0.447583	0.049923
hisM	-0.410852	0.049923
fdx	0.563467	0.0500451
djlA	-0.362359	0.0503934
hlpA	0.442554	0.0508158
yhhY	0.382005	0.0520706
kefC	-0.39327	0.0521327
mutM	0.32022	0.0521327
galE	-0.46612	0.0530052
hda	-2.68544	0.0530052
torI	-0.341014	0.0545586
yceG	-0.39408	0.0547635
yecG	-0.461572	0.0549624
polB	-0.464708	0.0553991
yibH	0.311958	0.0555037
yedZ	-0.381362	0.0562807
yciN	-0.375037	0.0564568
cueO	-0.38732	0.0565565
xylR	0.316373	0.0565565
ybaM	0.313006	0.0565565
ymfM	-0.507795	0.0565565
ydgH	0.373523	0.0566917
ushA	0.285635	0.0569395
sapA	-0.361271	0.057344
yqgB	0.344882	0.0575558
yebC	-0.231232	0.057795
ypdB	-0.343167	0.0579762
yeaO	-0.249947	0.0581906
spy	-0.350563	0.0586472
idnD	0.379943	0.0590371
ymfQ	-0.424024	0.0591982
mraZ	-0.489363	0.0592747
yfcM	-0.397216	0.0594826
nikA	0.358908	0.0596759
fucR	0.309904	0.0601107
ydbJ	0.385075	0.0608746
stfQ	0.384469	0.060953
mdtG	-0.467179	0.060985
rdgC	0.278492	0.060985
astD	-0.416834	0.0610796
yhhZ	0.418784	0.0617468
rluA	-0.397475	0.0621009
xerC	0.637884	0.0621009
allR	0.288839	0.0630325
trkH	0.558189	0.0635028
yqgC	-0.634044	0.0649226
xdhC	0.347184	0.0658838
ymfH	-0.378715	0.0658838
pncA	-0.376153	0.065929
ydeN	0.302924	0.0670919
yibG	0.291373	0.0673946
tauC	0.259391	0.067515
rhlE	-0.454359	0.0679486
feoA	0.41514	0.068483
yebQ	-0.243779	0.0685049
yoaC	-0.227039	0.0685049
ymgD	-0.476964	0.0690916
mmuP	0.438279	0.069158
yiaK	0.286318	0.069158
yagM	0.449326	0.0692294
ybgI	-0.392872	0.069716
sseB	-0.48154	0.0699196
afuB	0.443301	0.070285
ddpF	0.320331	0.070285
srmB	0.675629	0.070285
malS	0.311541	0.0708644
ybcY	0.247334	0.0708644
yedX	-0.382393	0.0708644
ykfF	0.388383	0.0708644
yliG	-0.486044	0.0708644
yafN	0.458375	0.071934
yedP	-0.385343	0.0719439
entD	0.366051	0.0725604
yicL	0.300549	0.0726209
yoaB	-0.230852	0.0726209
yedM	-0.370669	0.0730115
ymfC	-0.375995	0.0730475
yoaF	-0.243723	0.0734427
yfbQ	-0.381897	0.0738901
yqeG	0.276466	0.0738901
mdtE	0.342877	0.0746562
sdaA	-0.245857	0.0746562
citF	-0.403018	0.0753922
ydjF	-0.403887	0.0762182
ykgH	0.303848	0.0762182
ydjY	-0.361862	0.0764313
udk	0.324822	0.0765284
yohM	-0.362669	0.0765284
hlyE	-0.338593	0.077286
yceJ	-0.565931	0.0780876
yodD	-0.427066	0.0780876
oxyR	0.541307	0.0781206
yahD	0.266168	0.0783744
manX	-0.288521	0.078575
yedO	-0.410121	0.0796245
yjjX	-0.458586	0.079728
ybjK	-0.43667	0.0799256
yedF	-0.354233	0.080269
yfgC	0.457114	0.080269
ampH	0.27829	0.0804053
hrpB	-0.533254	0.0809368
potB	-0.301427	0.0811811
fliS	-0.437334	0.0819568
ybhO	-0.416579	0.0819772
yqeH	0.291325	0.0819772
bcsB	0.350227	0.0821637
tiaE	0.306836	0.0821637
caiD	-0.381374	0.0828291
yhcD	-0.332303	0.0828291
ycjQ	-0.304469	0.0828408
ydeI	0.30547	0.0836562
yfdC	-0.302903	0.0843307
narJ	-0.398563	0.0843756
ymfD	-0.347357	0.0846091
gntX	0.997379	0.0855369
ycdM	-0.319192	0.0855369
yddJ	0.284133	0.0855369
yfeY	-0.32474	0.0855369
ansP	0.279828	0.085561
yjcC	0.2849	0.085561
endA	0.342723	0.0856483
lysS	1.22343	0.0859923
yqeB	0.280511	0.0861337
ilvA	-0.447263	0.0862884
yhcG	-0.406767	0.086828
ykiA	0.252204	0.0870772
ycgN	-0.325203	0.0873142
ymjA	-0.376692	0.087469
pyrL	0.353779	0.0892047
yjgD	0.329722	0.0892047
fliI	-0.425972	0.0892284
yebE	-0.233286	0.0892284
hflX	-0.495483	0.0902499
grxA	-0.394848	0.0906234
aldB	0.289079	0.0910468
flgC	-0.409121	0.0912104
ymfA	-0.326017	0.0912104
nadR	-0.541176	0.0914336
flgK	-0.485226	0.0938782
rfaZ	0.413223	0.0939046
uspA	0.292366	0.0947868
ygfX	0.32583	0.0947868
gcvP	0.691235	0.0950233
yacL	-0.462501	0.0961046
yacC	-0.362192	0.0964253
livH	0.401982	0.096659
poxB	-0.425428	0.0966666
talA	-0.277349	0.0977872
spr	-0.414363	0.0984624
asmA	-0.487846	0.0987724
yaiX	0.252862	0.0987724
yciG	-0.418653	0.099593
araH	-0.340983	0.100389
gatC	-0.382216	0.100389
ybbW	0.251928	0.100389
trmA	0.368913	0.100657
yecF	-0.441886	0.101414
ecpD	-0.375265	0.102124
yohG	-0.300727	0.102124
yrfB	-0.35982	0.102124
yohH	-0.269195	0.102563
trmU	-1.32564	0.102777
xapB	-0.312252	0.102777
yacF	-0.515466	0.102853
yfcX	-0.351598	0.102853
mhpE	0.262614	0.103881
cysK	2.70503	0.104168
bdm	0.285569	0.104346
cobB	-0.450989	0.105304
ycjP	-0.258213	0.105304
yedY	-0.375262	0.105304
hokA	0.298758	0.107271
dinI	-0.414053	0.107401
yobH	-0.252183	0.107401
yrhB	0.359104	0.108742
gatD	-0.277658	0.109777
pcm	0.294545	0.110514
ycgH	-0.454266	0.110872
panB	5.31688	0.111059
artP	-0.39304	0.111101
nagZ	-0.502665	0.111323
rsxG	0.412307	0.112744
ybaX	0.243435	0.112744
yggT	0.334129	0.112744
yheM	-3.30899	0.112744
cmtA	0.341096	0.113601
mak	0.244752	0.113769
frlB	-0.523704	0.113821
tesB	0.264562	0.114486
ykgA	0.334879	0.114486
cmk	4.49675	0.114873
fdhE	0.362942	0.114873
ychE	-0.413866	0.114873
ydcF	0.308302	0.114873
ydjL	-0.368239	0.114873
yjcH	0.313718	0.114873
fliQ	-0.357081	0.115839
potA	-0.344815	0.115839
pstS	0.475782	0.116278
ykfB	0.31585	0.116278
ygcE	0.27825	0.116442
uhpC	0.293377	0.11756
yagQ	0.297424	0.11756
ydcR	0.356694	0.118394
ycjN	-0.263761	0.118845
yhjY	0.283419	0.118845
ygcB	0.279532	0.119366
intR	0.234779	0.119851
atpI	-0.491526	0.121069
cynR	0.299136	0.122451
potH	-0.407859	0.122973
yaiL	0.323977	0.122973
tolB	0.479033	0.123257
yidF	0.251258	0.123257
epd	-1.00322	0.123283
narX	-0.390411	0.123283
yhdH	-0.296248	0.123283
yagJ	0.363092	0.123321
yhhN	0.348674	0.123328
mtlD	0.246818	0.123548
yqeA	0.265016	0.123548
rhoL	0.360449	0.123686
rrmA	-0.250219	0.123686
galM	-0.49638	0.124242
tdk	-0.427979	0.124242
yneL	0.281938	0.124242
hypA	0.4171	0.124533
narH	-0.37722	0.124533
pta	1.48596	0.124885
uxaB	0.285828	0.124902
yaiU	0.302786	0.12647
ytjB	-0.344027	0.12647
nikC	0.311075	0.127057
rcsA	-0.361489	0.127822
fliR	-0.385605	0.128169
icd	0.975929	0.128247
eutE	-0.421569	0.128639
yciV	-0.322648	0.128639
fucK	0.273737	0.129052
caiB	-0.33277	0.12968
yqeI	0.253109	0.12968
ybbA	0.227031	0.129723
aaeB	-0.358316	0.129745
yeaB	-0.214384	0.130174
rsxC	0.404213	0.130216
barA	0.253769	0.130719
ygcQ	0.279096	0.131674
ybaA	0.274052	0.132032
nudF	-0.290173	0.132247
eutB	-0.247254	0.1323
fliY	-0.37047	0.1323
paaX	0.269218	0.1323
yafO	0.321383	0.1323
ygfA	-0.652919	0.1323
yqfB	0.363521	0.1323
fucO	0.237514	0.132467
nhaB	-0.308303	0.132467
tauD	0.259396	0.132937
stfE	-0.355761	0.133517
yraP	-0.452188	0.133517
metA	0.331122	0.134576
ydcI	0.248816	0.134576
ynjA	-0.325543	0.134576
yhhK	1.45049	0.134806
dppB	0.295763	0.135505
flgE	-0.410497	0.135505
otsA	-0.309726	0.135505
rsuA	0.278622	0.135505
ugpB	0.258831	0.135505
xylG	0.272229	0.135505
yeaN	-0.221932	0.135569
htrE	-0.367321	0.136364
cyoA	0.235131	0.136615
yfbJ	-0.290998	0.137511
yegW	-0.276223	0.137553
fliK	-0.539857	0.138075
hcaT	-0.314861	0.138276
pps	-0.369933	0.138276
yecI	-0.336774	0.138276
ychA	-0.398818	0.138962
fabH	4.36677	0.139746
fdrA	0.313547	0.139746
ydjR	-0.300816	0.140103
yjeP	-0.316722	0.14036
folX	-0.321583	0.140654
nuoN	-0.253459	0.140654
yddH	0.270276	0.140654
yecD	-0.185981	0.140654
yraI	-0.367209	0.141813
yrbG	-0.423304	0.14233
yecP	-0.193416	0.142463
yqcB	0.268939	0.142897
xthA	-0.389514	0.143066
zntA	0.8348	0.144626
yqfA	0.368103	0.144895
livF	0.313233	0.145133
pbl	0.251988	0.145219
yaiZ	0.244662	0.145371
ybcO	0.313767	0.146233
yfcS	-0.316893	0.146769
mdtK	0.344314	0.147161
fbaB	-0.244492	0.14771
greB	-0.514231	0.148567
ycfT	-0.286281	0.148776
ugpC	0.319969	0.149831
rsmC	-0.465489	0.150135
xapA	-0.28561	0.152678
ycjS	-0.274638	0.15289
gcvA	0.337122	0.154189
ltaE	-0.375412	0.154189
mdoD	0.29639	0.154189
pcnB	0.695069	0.154189
yagH	0.480667	0.154189
yohJ	-0.247114	0.154281
csiE	-0.429987	0.15454
gltD	0.269033	0.15454
ydhF	-0.370319	0.155382
yehL	-0.306141	0.155626
mhpR	0.238381	0.155778
thiM	-0.291413	0.155778
ycfR	-0.261411	0.155778
ycfN	-0.369613	0.155922
ompW	-0.397476	0.155978
gnd	0.401819	0.156566
yagZ	0.287049	0.156566
frc	-0.23704	0.158335
katE	-0.334576	0.158335
pstB	0.35358	0.158335
yceI	-0.416287	0.158335
yeeO	-0.644987	0.158335
yobG	0.203658	0.158335
ddpA	0.235869	0.158972
purU	-0.338245	0.159198
yadD	-0.368912	0.159198
creC	-0.326225	0.159258
fdhD	0.320728	0.159258
yfcL	-0.291142	0.159258
yqiB	-0.290925	0.159258
rbsD	-0.35292	0.159591
ade	0.250076	0.159643
galU	0.307251	0.159643
potC	-0.27119	0.159643
ydfX	0.235494	0.159643
yniA	-0.327886	0.159643
acpT	0.317182	0.159759
ymgA	-0.302419	0.160454
hinT	-0.330263	0.160721
mdoH	0.382471	0.161126
ybdM	-0.230596	0.161126
ydfG	0.279494	0.161126
yhjV	0.29037	0.161126
cspF	0.249125	0.162417
rpe	0.511229	0.162417
yjdA	0.316431	0.162417
yieP	-0.451414	0.162847
ypjD	0.413771	0.164092
feoB	0.398857	0.164097
rihC	-0.340763	0.164242
yagF	0.827058	0.164242
ycaJ	-0.277497	0.164242
yfeT	-0.229818	0.164242
dctA	0.545307	0.165506
mlrA	-0.301008	0.165506
glpD	0.136494	0.165519
ycfP	-0.335004	0.165522
yfaE	-0.799954	0.165522
yadB	-0.432155	0.165847
arcA	-1.64633	0.166335
yggS	-0.80809	0.166335
gadC	0.228708	0.166442
ykiB	0.207683	0.166676
nagB	-0.341636	0.166779
yccK	-1.51394	0.168354
ivbL	0.232128	0.168504
hypD	0.330374	0.169858
yoaE	-0.241962	0.170985
livJ	0.376395	0.171543
ygcH	0.267803	0.172281
ymgF	-0.257295	0.172281
lyxK	0.252201	0.172341
ylcG	0.227915	0.172411
nrfD	0.259353	0.172837
glpT	-0.270963	0.174065
oppC	-0.294829	0.174065
xdhD	0.232196	0.174617
ykgE	0.301094	0.174617
fhiA	0.290026	0.175046
argC	0.318782	0.175365
clpB	-0.407106	0.175365
pfkB	-0.307877	0.175365
ydjJ	-0.287416	0.175365
yphF	-0.352745	0.175481
yajR	0.250381	0.176046
hypC	0.377325	0.176072
yjjK	-0.354078	0.176222
ygfO	0.242231	0.177581
fliO	-0.338929	0.178019
yfcQ	-0.311443	0.178019
ykgB	0.29155	0.178019
yagW	0.333103	0.178344
ompR	0.982543	0.179968
soxR	0.247698	0.179968
ymfE	-0.316314	0.180861
ycaP	-0.292266	0.181996
bax	0.301867	0.182066
yagG	0.591898	0.182585
ygeY	0.251042	0.18415
rumA	0.255064	0.184544
hepA	-0.283154	0.185138
tyrP	-0.296066	0.18577
ompF	0.526057	0.186403
phnD	0.248558	0.186403
rhtB	0.39655	0.186403
yabI	-0.356485	0.186403
ybaL	0.235406	0.186403
rssA	-0.355932	0.186747
usg	-0.289738	0.186747
fucA	0.231125	0.187184
smpA	0.336869	0.187288
gltS	0.218462	0.187428
rffH	-0.294977	0.187568
prfH	0.302592	0.188189
mhpC	0.254897	0.189457
artI	-0.434185	0.189729
envC	-0.496983	0.189729
gadE	0.353667	0.189729
rpiR	0.27229	0.189729
ygfQ	0.218952	0.189729
yobF	-0.180589	0.189729
hipB	0.233268	0.190457
ygaZ	-0.272739	0.190966
nikB	0.263104	0.191027
yagP	0.351431	0.191027
ybcH	0.224635	0.191027
yfiK	-0.336574	0.191027
chpR	0.272224	0.191085
flgD	-0.349475	0.191085
yccU	-0.553991	0.191085
yegZ	-0.242066	0.191085
yheN	-1.55509	0.191085
ykgF	0.279415	0.191085
yncG	0.295419	0.191085
dhaH	-0.333934	0.1916
ggt	0.29548	0.1916
mtlR	0.233685	0.1916
nlpA	0.240866	0.1916
ycgX	-0.287792	0.1916
yidR	0.241797	0.1916
ilvN	0.215059	0.193318
eutH	-0.252507	0.193714
ybcK	0.226863	0.193788
fhuE	-0.360644	0.194105
ycaC	-0.347719	0.19524
intE	-0.267299	0.195271
ydaF	0.253828	0.196231
ydfJ	0.255883	0.196399
ycjG	-0.186116	0.19763
ydeU	0.229545	0.198821
ydeK	0.252595	0.199385
frmA	0.235789	0.19997
ynjC	-0.249226	0.201387
sthA	0.289535	0.201833
sdhC	0.177261	0.201937
yqcE	0.313058	0.201937
ycjX	-0.192276	0.202022
narL	-0.307705	0.202662
setA	-0.291028	0.203592
yncC	0.242379	0.204164
yehS	-0.246603	0.205234
flgF	-0.403086	0.205393
yaiC	0.242158	0.205432
tolR	0.441158	0.205449
ydeJ	0.203501	0.206963
yohO	-0.233577	0.206963
thiP	-0.377901	0.208506
ycfS	-0.42524	0.208654
yiiT	0.30812	0.209245
ydhO	-0.352441	0.211433
yaiT	0.219582	0.212203
yzgL	0.386219	0.212644
yafX	0.279433	0.212937
clpS	-0.392464	0.213018
rtcA	0.32178	0.213108
ydaU	0.276832	0.213416
uvrB	-0.33294	0.213552
cpxR	-0.3117	0.214042
hdfR	0.524887	0.214249
yeaM	-0.151268	0.214249
yqiA	-0.277482	0.214249
ybaE	0.221434	0.214302
yegT	-0.223659	0.214537
ycdQ	-0.370964	0.215317
ansB	0.252416	0.216898
chaB	-0.313337	0.216898
ybaT	0.211368	0.216898
htpX	-0.170521	0.217167
udp	0.373218	0.21734
yieK	0.306718	0.217807
lsrC	0.321462	0.219775
rluC	-0.758038	0.219882
hypE	0.267898	0.220367
yeaV	-0.207378	0.221379
yadE	-0.373469	0.221738
ycgG	-0.22914	0.221798
yaaH	-0.279318	0.222247
mngR	-0.34288	0.222385
ygdI	0.334905	0.222385
adhP	0.227642	0.222948
eaeH	0.252688	0.222948
ybiP	-0.278356	0.222948
yccF	-0.476174	0.224254
yrfA	-0.350419	0.224897
yaiI	0.243317	0.22535
atpA	0.271994	0.226564
nlpB	-0.278465	0.227311
yqjC	-0.239976	0.227311
proY	0.204873	0.227538
ybbP	0.217255	0.228127
speF	-0.205583	0.228321
araG	-0.310037	0.229037
yncM	0.209495	0.229672
ybiV	-0.301733	0.23047
hypB	0.312266	0.231427
sucB	0.480125	0.231427
panF	-0.264512	0.231532
ybaY	0.217745	0.231532
ydeP	0.246353	0.231945
yeaD	-0.243075	0.231945
def	-0.240865	0.232369
ompT	0.336902	0.232369
yneJ	0.226287	0.232369
mazG	0.249878	0.233166
xylH	0.271336	0.233751
kduI	0.199556	0.234745
pal	0.41949	0.23483
prpC	0.231965	0.23483
intD	0.198134	0.234945
yjcF	0.224549	0.235037
cmr	-0.239165	0.238354
osmE	-0.271641	0.238962
ygeD	0.213953	0.238962
ygeV	0.207623	0.238962
uup	0.712346	0.239257
ygdR	0.220126	0.23966
yjcZ	0.297921	0.23966
eamA	0.213734	0.242066
uhpB	0.297194	0.243912
ampG	0.221831	0.244257
radA	0.228693	0.244257
yajC	0.232073	0.244257
ydfP	0.188289	0.244257
yfbF	-0.234614	0.244257
yafM	0.27236	0.245022
manZ	-0.182704	0.245605
yebN	-0.161109	0.24605
leuA	-0.248249	0.248347
ampE	-0.335817	0.248352
yfbP	-0.236676	0.249021
elaA	-0.29516	0.25024
nrfE	-0.255215	0.250438
ptsG	0.414418	0.253836
yegV	-0.282321	0.253836
cedA	-0.277476	0.25406
ycjR	-0.194007	0.254264
yfeO	-0.191332	0.254334
yohL	-0.260441	0.255096
yneK	0.224606	0.255352
yceF	-0.51693	0.255515
chbF	-0.295015	0.255727
amn	-0.572145	0.255804
fepE	-0.190306	0.255942
fliP	-0.314654	0.255942
folM	-0.278273	0.255942
atoC	-0.265083	0.255998
ascB	0.263356	0.256295
ybaN	0.398691	0.256295
cybB	0.275064	0.25634
ynjB	-0.262119	0.256465
yecN	-0.171814	0.256473
yfdI	-0.350671	0.258241
kbaZ	0.306186	0.258874
ydcZ	0.242851	0.260224
yjiX	-0.334713	0.260224
tesA	0.201052	0.261747
damX	-0.319613	0.261795
guaD	0.186876	0.261795
rpoD	0.58957	0.261795
dsbC	0.213348	0.262547
hofQ	-0.234956	0.262547
yagU	0.291286	0.262547
yehK	-0.206983	0.26391
yehM	-0.22452	0.26391
yjbO	0.355563	0.26391
exuR	-0.247133	0.264444
ynjI	-0.289314	0.264444
ycgE	-0.201938	0.26529
cpdB	-0.240735	0.265354
glnB	-0.258827	0.265354
araJ	0.214787	0.26697
priA	-0.744109	0.26697
emtA	-0.281293	0.267507
paaK	0.235214	0.267507
ydjA	-0.271452	0.267507
yehW	-0.254592	0.268157
psiF	0.213357	0.268637
yicN	0.198724	0.269094
cchA	-0.197108	0.269323
speA	-0.616868	0.269323
yjiR	0.265325	0.269323
yigI	-0.331763	0.271089
moaD	-0.319597	0.271416
yacH	-0.313736	0.271416
yffH	-0.175493	0.271416
otsB	-0.30485	0.271773
yejB	-0.241543	0.271773
agaD	-0.292058	0.271869
yecH	-0.286085	0.271869
yagR	0.337288	0.271962
bioA	1.48755	0.272
yfcA	0.27039	0.272127
eutI	-0.235595	0.27298
yfcT	-0.241765	0.27298
yraM	0.28055	0.273117
aroD	2.56502	0.273234
ycbV	-0.407004	0.27367
ybhF	-0.40118	0.273986
flgJ	-0.359274	0.274508
msyB	-0.325014	0.274508
yehD	-0.228636	0.275363
fruB	-0.231536	0.275877
bipA	0.480019	0.275914
gspE	0.340394	0.275914
yahL	0.171633	0.275914
astB	-0.247288	0.276126
kch	-0.270844	0.2762
pfs	1.48576	0.277906
ydgK	-0.276411	0.278066
nuoG	-0.186085	0.278342
moaC	-0.303402	0.278453
ptr	0.200511	0.281045
yegS	-0.196653	0.281623
hslO	-0.26292	0.281779
sufB	-0.233798	0.281779
yeaU	-0.164286	0.281779
cspD	-0.344075	0.28193
sanA	-0.230563	0.28193
yfbO	-0.21074	0.281954
betT	0.192268	0.282333
dgsA	0.235955	0.282333
ksgA	-1.07423	0.282333
kdgR	-0.188503	0.282389
dppD	0.240451	0.284736
oppD	-0.258681	0.284923
potF	-0.390597	0.28516
pspA	0.247315	0.286237
yaiF	0.217022	0.286237
acnA	-0.274191	0.287592
ddpD	0.233727	0.288557
mngB	-0.300731	0.288557
ydeR	0.213583	0.288557
motB	-0.291855	0.290351
pinQ	0.206092	0.290533
surE	0.285226	0.290533
ydjQ	-0.224129	0.291465
yfcV	-0.226101	0.291465
yabP	-0.303159	0.291886
kdpF	-0.293184	0.292665
glxR	0.21867	0.29271
yfbR	-0.217507	0.29271
rimJ	-0.266284	0.293153
ytfL	0.280013	0.293153
ybbV	0.162978	0.293223
ycgI	-0.27804	0.293223
phnL	-0.235289	0.294267
rfbD	-0.221224	0.294267
tehA	0.216332	0.294267
ydhX	-0.228148	0.294267
rfaY	0.259506	0.294377
fecC	-0.352091	0.294864
acs	0.210367	0.295083
ykgN	0.318665	0.29628
ydfT	0.191209	0.296411
flgN	-0.259384	0.297069
yfgG	-0.35228	0.297069
yiaU	0.184202	0.297616
yheU	-0.346267	0.298304
flgG	-0.2598	0.29898
setC	0.197757	0.29898
ycjO	-0.198067	0.299557
yjgA	0.330711	0.299557
arpA	0.241456	0.299557
gadX	0.289364	0.300121
puuP	-0.20268	0.300121
kefG	-0.30911	0.301176
ogrK	-0.186589	0.301176
ypjC	0.216868	0.301176
talB	-0.189266	0.301389
ibpB	0.210722	0.301675
hyfH	0.176243	0.302044
aaeR	-0.271924	0.302874
recJ	0.137783	0.302874
dos	0.180068	0.303542
gidB	-0.494516	0.303735
kgtP	-0.300829	0.303735
maa	0.186711	0.303735
lipA	2.9789	0.303959
nusB	-2.26792	0.304534
rfaB	0.328145	0.304534
ycgF	-0.199272	0.304584
yciO	-0.285596	0.304584
rfbC	-0.192993	0.305749
yhcC	0.232205	0.306745
selD	-0.257101	0.307778
ybhC	-0.309167	0.307778
afuC	0.270901	0.310671
yghD	0.222425	0.311769
fdnH	0.197984	0.31209
gst	-0.279781	0.313337
ychP	-0.219038	0.313337
ydeM	0.17443	0.313337
ydcT	0.214478	0.313377
prmA	-0.231436	0.314217
ycfM	-0.276055	0.314217
yebO	-0.177485	0.314578
yqaC	0.280071	0.315614
elbA	-0.216378	0.317365
ykgD	0.261133	0.317365
ygaC	0.22017	0.317826
yhbU	-0.35931	0.317826
ydfZ	0.194485	0.31824
menA	0.293245	0.318629
avtA	0.185275	0.319362
uspE	-0.19523	0.319362
yfdE	-0.180093	0.319362
yliB	-0.260771	0.319818
yfdH	-0.196566	0.321219
flk	-0.255644	0.322389
yneG	0.188015	0.322389
rpmJ	-1.64433	0.32338
gsk	0.189047	0.323759
yjgM	0.202866	0.323759
htrC	0.286042	0.326029
sgbU	0.211948	0.326987
napF	-0.298676	0.327327
sfcA	0.167906	0.327327
ydhK	-0.251885	0.327327
yfdX	0.206111	0.327327
yhhM	0.252577	0.327327
yhgN	0.275822	0.327606
fliE	-0.39492	0.328597
ygiW	0.232257	0.328597
slyD	-0.311972	0.33023
tauB	0.201546	0.330595
yfhR	-0.239873	0.330595
yghK	0.193907	0.330595
yhhA	0.236813	0.330595
btuB	0.231931	0.331203
yfiH	-0.265372	0.331203
yjgL	-0.219053	0.331203
ytfR	-0.250532	0.331203
galK	-0.275038	0.331562
argA	0.136268	0.332214
yajD	0.193265	0.332214
yhbO	-0.297021	0.332726
glnP	-0.230922	0.33292
rpoS	0.453837	0.333806
rssB	-0.283151	0.333907
ydcV	0.213058	0.333964
ydcY	0.189372	0.333964
ygfG	-0.249147	0.333964
yqjA	-0.195843	0.333964
nuoB	-0.203172	0.334102
yciB	-0.257181	0.334102
ybhD	-0.226933	0.334529
yjcO	0.212802	0.334529
alkB	-0.208115	0.334825
kduD	0.214608	0.334825
ygfI	0.248379	0.334825
ytfP	-0.228627	0.334825
alx	-0.199948	0.33577
modF	-0.281291	0.33577
mtgA	-0.339683	0.33577
yicH	0.167925	0.33577
ybgL	-0.198752	0.335928
yddK	0.188491	0.335928
yibK	0.182034	0.335928
ygdD	0.192041	0.336064
pmrD	-0.243928	0.337382
glnH	-0.27291	0.340006
yagT	0.236098	0.340377
ygbN	0.213607	0.340377
tfaS	-0.205942	0.341701
yhdE	-0.214026	0.341701
ygjF	0.214969	0.343054
sgcB	-0.200198	0.343495
mutY	0.278121	0.343746
cynS	0.172182	0.34484
yjaA	0.466494	0.345007
allC	0.200909	0.345204
agaR	-0.326622	0.346353
lar	-0.284651	0.346353
cvpA	-0.442584	0.347261
dadX	-0.254895	0.347293
trpR	-0.231068	0.347293
yeaK	-0.214968	0.347293
ycfJ	-0.295936	0.347445
ddpC	0.207553	0.347467
astE	-0.213202	0.347953
yhjC	0.231286	0.347953
manA	-0.1465	0.348201
agaW	0.2498	0.34983
rumB	-0.308302	0.350326
ybcM	0.171996	0.350351
yeaQ	-0.14587	0.350351
yfdZ	-0.221997	0.352339
fadA	-0.297348	0.353601
yfcI	-0.228373	0.353601
ligB	0.204514	0.35522
clcB	-0.171194	0.355718
hslV	-0.210741	0.355718
yfcF	-0.2231	0.355718
yfgM	-0.265839	0.355718
yciE	-0.27513	0.355849
ygbF	0.217703	0.355849
ylbH	0.166931	0.355849
fhlA	0.259562	0.355938
gapA	-0.19988	0.356721
yhjH	0.263447	0.357126
cycA	0.260786	0.357266
yciT	-0.230381	0.357266
maeB	0.217231	0.357632
hycC	-0.196826	0.358072
pqqL	0.194732	0.358072
yeaA	-0.26219	0.358072
glnK	0.199903	0.358075
ygeI	0.164969	0.359196
emrE	0.174777	0.35941
rbsR	-0.274314	0.35941
ygbK	0.193731	0.360263
bioF	1.5355	0.36057
eutQ	-0.169131	0.36057
phoB	0.1159	0.36057
yagE	0.520393	0.36057
yebY	-0.152276	0.36057
yfcG	-0.206068	0.36057
frmB	0.218702	0.360768
hycG	0.222696	0.360962
hyfA	-0.178443	0.360962
pitB	0.18059	0.360962
ygeF	0.164638	0.362183
yhhT	0.223056	0.362183
mhpT	0.179629	0.362859
ugpQ	0.195443	0.363346
ynbC	0.167678	0.363346
malK	0.190139	0.364182
nanT	-0.264075	0.364182
sbmA	0.158416	0.364675
ydeV	0.169561	0.364863
ydfI	0.191998	0.36522
entA	0.179378	0.365503
hybD	-0.215246	0.365503
mngA	-0.247655	0.365503
ulaR	-0.245582	0.365503
ybjQ	-0.291697	0.365503
yggR	0.335883	0.365764
ygaM	0.189869	0.365892
fimB	0.197796	0.365894
ybgK	-0.225227	0.366499
ddpX	0.248066	0.366832
yadM	-0.248362	0.367249
ygbT	0.206618	0.367594
eutP	-0.177188	0.367953
ypdF	-0.22678	0.367953
yhbY	0.318876	0.368504
azoR	0.17509	0.369065
glgX	-0.25868	0.369343
appB	-0.453288	0.36997
ybbC	0.176674	0.37101
nfsA	-0.282864	0.372342
pbpG	0.174557	0.37278
yifE	0.477048	0.37278
alsC	0.198955	0.373834
dinF	0.186145	0.373834
nuoE	-0.184447	0.373834
ybgJ	-0.210451	0.373834
emrA	0.182211	0.373851
ygcG	0.211748	0.373851
rem	0.173385	0.373901
sufI	-0.22708	0.373901
glcC	0.190092	0.373907
ftn	-0.202996	0.374612
ycgV	-0.188889	0.374612
thrL	0.213406	0.374803
mdlB	0.188718	0.375162
yfiA	0.219173	0.375162
dedD	-0.313701	0.375534
livG	0.204422	0.375534
yadS	-0.20168	0.375534
ydiK	-0.19564	0.375534
proP	0.240441	0.375874
yfjF	0.330249	0.375874
ybiR	-0.204912	0.37779
uvrC	-0.273782	0.377828
yfhQ	0.270874	0.378044
gntU	0.249981	0.378261
yafT	0.206681	0.378261
ydjX	-0.224858	0.378368
cyaY	0.310699	0.378427
yihU	-0.284354	0.379041
entF	0.286387	0.379787
yajO	0.173332	0.379787
minC	-0.337823	0.380732
cbpA	-0.306381	0.381356
fecR	-0.181703	0.381356
nudH	0.380682	0.381356
mdtH	-0.286	0.381592
fliL	-0.261612	0.381664
yehB	-0.180995	0.381664
yfiF	-0.22689	0.381664
yafP	0.212509	0.381844
yjbJ	0.187285	0.381934
ubiC	0.160094	0.382064
rof	0.206675	0.382646
fliZ	-0.255895	0.382892
ycfQ	-0.272095	0.382892
truB	-0.322029	0.384406
metN	-0.262705	0.384505
ybfN	-0.228385	0.384694
ulaF	-0.178851	0.384883
yjbQ	0.219805	0.384883
mcrA	-0.193881	0.384886
glk	-0.165461	0.385162
thrB	-0.222363	0.385207
osmC	0.186043	0.38525
ybiS	0.197132	0.38525
murP	-0.210642	0.385878
ybiH	-0.286524	0.385878
yciC	-0.290409	0.385878
trmC	-0.251111	0.387515
fcl	-0.221939	0.388031
mdlA	0.157493	0.388031
moeB	-0.294109	0.388031
yegX	-0.204259	0.388031
cspE	-0.265045	0.389213
xerD	0.717663	0.389213
ybaJ	0.192533	0.389213
yeiC	-0.183884	0.389213
yncH	0.210555	0.389213
ybjO	-0.253102	0.389968
yfcN	-0.355515	0.390065
caiC	-0.22024	0.390158
yhgF	0.253871	0.390274
eptB	0.202783	0.39134
araF	-0.26162	0.391375
ydiH	-0.188583	0.391375
ydiD	-0.257402	0.391589
yniD	-0.270829	0.391615
napD	-0.227608	0.392176
sfsB	-0.290555	0.392567
bioH	1.78796	0.393054
glgS	0.207987	0.393054
yecT	-0.140805	0.393054
yphD	-0.256845	0.393054
speD	0.495676	0.393365
ylbA	-0.146424	0.393365
dsrB	-0.24492	0.393383
sodC	-0.227617	0.393383
ybdJ	-0.158764	0.393383
yhfK	0.294199	0.393569
yfcH	-0.241702	0.394476
ydgI	-0.203881	0.394655
codA	0.151746	0.394771
slyX	0.291869	0.394771
tfaE	-0.183155	0.394771
galR	0.153864	0.394775
uhpA	0.17417	0.394775
yfiN	-0.246264	0.395102
yhfA	0.232004	0.395102
fimC	0.194928	0.396627
glxK	0.159315	0.396627
nrdF	0.194717	0.396627
prkB	-0.228661	0.396627
tdcR	-0.21941	0.396627
yddG	0.167884	0.396627
ydiQ	-0.238488	0.396627
yeaE	-0.193067	0.396627
yjaB	0.206843	0.396627
ytfH	-0.233481	0.396627
malY	-0.221358	0.396884
zwf	0.418094	0.398093
kdpD	0.281719	0.398621
rhaD	0.223824	0.399385
artQ	-0.249366	0.399612
hcaE	-0.254765	0.40086
malM	0.183563	0.40086
proX	0.214014	0.401235
ygiN	0.206487	0.401235
ydcJ	0.143775	0.401878
narY	0.162761	0.40267
ygdH	0.174001	0.403207
sra	0.148567	0.403712
citA	-0.225599	0.404514
fimE	-0.21078	0.404514
garL	-0.25257	0.404514
rnk	-0.22782	0.404514
sucD	-0.222371	0.404514
yicI	0.158439	0.404514
aphA	0.233835	0.406724
gspA	-0.228652	0.406724
moaE	-0.254783	0.406724
ybfM	-0.212983	0.406724
yedL	-0.212359	0.406724
yfeD	-0.177451	0.406724
ygfZ	1.94191	0.406724
ftsN	0.5654	0.407156
pepN	-0.562217	0.407156
tig	0.186189	0.407156
yggP	0.215413	0.407156
yghG	0.190794	0.407156
yjgW	-0.189355	0.407156
yraO	-0.304572	0.407156
zapA	0.171295	0.407156
mtr	-0.323956	0.408992
ycbS	-0.172165	0.408992
yidQ	0.165824	0.409064
malQ	0.271526	0.409384
panE	1.28188	0.409384
renD	0.143926	0.409789
ygeN	0.126307	0.409933
phnK	0.177591	0.410379
yqiH	0.171529	0.410379
yrfF	0.193098	0.410379
hydN	0.213223	0.410931
ybiX	0.265151	0.410931
thiG	0.678169	0.411686
fecD	0.169557	0.411723
ygaU	0.216278	0.411723
acrR	0.158232	0.41194
argP	0.199182	0.412775
flgI	-0.226037	0.412775
glvB	0.181508	0.412775
trpD	0.831992	0.412775
ydbK	0.155019	0.412775
ydhT	0.202578	0.412775
ulaA	-0.195896	0.41462
yjbR	0.174712	0.414866
gltF	-0.188171	0.414951
mglC	-0.165182	0.414951
sseA	-0.218576	0.414951
mrcA	0.184873	0.415821
aaeX	-0.226868	0.416256
ycaK	-0.232703	0.416256
yfbG	-0.168176	0.416397
ybbS	0.136259	0.417794
pck	-0.18724	0.41819
qor	0.186031	0.41819
rcsF	0.255188	0.41819
recC	0.583717	0.41819
ybeT	-0.231125	0.418375
yiaH	0.217164	0.418375
yagN	0.560592	0.418662
phoH	-0.22779	0.419915
argT	-0.205639	0.420083
yeaI	-0.197948	0.420083
ytfM	-0.588014	0.420083
ahpF	0.17727	0.420843
hcp	0.225043	0.421916
ilvE	-0.235998	0.42261
ygiZ	0.17539	0.42261
mltD	0.242258	0.422868
yajQ	0.133115	0.422868
yjcP	0.210468	0.42407
asnC	0.3251	0.424523
acrB	0.14616	0.424952
yhhX	0.219098	0.424952
xseA	0.270128	0.425006
ppdC	0.150446	0.428291
dnaQ	2.76461	0.428428
metF	0.232463	0.428428
ydgG	0.174197	0.428428
yehR	-0.260133	0.428428
ypjM	0.174475	0.428428
amtB	0.17064	0.428481
trmH	0.172357	0.429696
ydfQ	0.158836	0.429696
yhdT	-0.204206	0.43084
ybjI	-0.223829	0.431891
flxA	0.154956	0.432791
yciF	-0.213639	0.432791
seqA	-0.678437	0.432825
recA	0.407988	0.433393
fliT	-0.208557	0.434707
dgoR	0.259393	0.435291
yfeC	-0.194331	0.437204
ppiB	-0.189639	0.437816
norR	0.216006	0.438953
asr	-0.178078	0.440608
dppC	0.193409	0.440625
rpiB	0.164843	0.440625
sucC	-0.161849	0.440625
yjbD	0.17619	0.440625
fruR	-0.206373	0.441178
ypfI	-0.16234	0.441178
fhuF	0.208732	0.442454
yijF	0.198816	0.442454
fdnI	0.220738	0.442712
fixC	-0.367216	0.443255
tas	0.152565	0.443255
yiiX	0.187348	0.443609
bioD	1.49847	0.443701
cspG	-0.159181	0.443701
slyA	-0.178371	0.443701
tgt	-0.155391	0.443701
ybdD	-0.158068	0.443701
ygaR	0.163935	0.443701
yaeH	-0.219133	0.445364
ybhB	-0.318092	0.445364
yghQ	0.187922	0.445364
kdsC	-0.274933	0.445443
degQ	-0.170345	0.446028
yagS	0.213119	0.446028
yfcD	-0.16865	0.446028
xylE	0.195492	0.446137
glnQ	-0.193572	0.446357
kdpC	-0.232984	0.446502
mdoB	0.219743	0.446502
abrB	-0.244129	0.448235
ybgH	-0.175455	0.448769
ydhJ	-0.215975	0.448836
yfeK	-0.155245	0.449155
yfdG	0.166539	0.4508
ydfU	0.143781	0.451068
topB	-0.20374	0.451331
yejF	-0.173369	0.451331
ynfB	0.163032	0.451331
gutM	0.229668	0.451841
yrbC	-0.250183	0.452206
yhbX	-0.226701	0.452923
clpP	0.332376	0.453134
yfjZ	0.166897	0.453134
ygbM	0.168703	0.453134
cspA	0.192564	0.453495
fhuA	-0.214266	0.453633
pinH	0.177587	0.453633
pflC	0.216945	0.454441
yedD	-0.226186	0.454878
caiF	-0.160799	0.454932
ddg	-0.173102	0.454932
gloB	-0.353754	0.454932
oxc	0.184247	0.454932
yjbC	0.173896	0.455375
narZ	0.156745	0.456176
ybiU	-0.187401	0.457056
rspA	0.136458	0.457353
yjjW	-0.203517	0.457353
pheL	-0.213123	0.459176
nirD	0.184724	0.459556
nhoA	0.159788	0.460342
rseB	0.218808	0.461008
arnT	-0.209384	0.461062
phoE	0.182246	0.461062
ybiO	-0.234592	0.461122
asnB	-0.194151	0.46138
yaaY	-0.581999	0.46138
nirB	0.241606	0.461878
yehI	-0.14852	0.462638
yafS	-0.231834	0.462702
pepD	0.203809	0.462886
yeiG	0.149513	0.46292
rpmI	-1.86096	0.463358
yrhA	0.17976	0.463461
citE	0.262082	0.463767
glpK	0.124826	0.463767
ygaH	-0.189696	0.464486
ydhR	-0.182235	0.465046
yliH	-0.203413	0.465046
cdh	0.214335	0.466876
hofC	-0.207205	0.466876
intA	0.189416	0.466876
dam	-0.355183	0.467045
ycdS	-0.187162	0.467045
sfmA	0.164915	0.468583
ycdO	-0.234189	0.468583
yhdA	-0.163964	0.468583
ypdD	-0.155069	0.468583
tam	0.13409	0.468923
ybdL	-0.130314	0.469831
ybaB	0.169487	0.470078
rnr	2.27106	0.470496
yqcC	0.219331	0.470496
ybiA	-0.207141	0.473176
ydcK	0.162148	0.473867
astC	-0.167868	0.474842
essD	0.133791	0.475579
hyfC	-0.149799	0.4758
hcaB	-0.235501	0.475825
mipA	-0.20023	0.475825
pspD	-0.134393	0.475825
yfaX	-0.150588	0.475825
holD	-3.47899	0.476034
ycfH	-0.174234	0.476034
ydiZ	-0.216781	0.476082
flgL	-0.197311	0.476796
mepA	-0.170408	0.476796
yfeU	-0.14401	0.476796
ygfJ	0.14197	0.476796
yijP	0.26094	0.476796
cusC	-0.170427	0.476931
ydjK	-0.164292	0.476931
zraR	0.187011	0.477784
fecA	0.143592	0.478174
mgsA	-0.211477	0.478174
sgcE	-0.138501	0.478174
yggJ	-0.180511	0.478174
crcA	-0.208287	0.478475
creA	-0.193272	0.478475
napA	-0.1725	0.478783
ybbL	0.123203	0.479906
helD	0.125865	0.480432
hokC	-0.192852	0.480579
cybC	-0.176468	0.480621
eutC	-0.144495	0.480884
hcaF	-0.200158	0.480884
phnC	0.154101	0.480884
yfbB	-0.161684	0.480884
argO	0.204632	0.482262
hemG	2.07981	0.482262
rcsD	-0.152517	0.482262
yafQ	0.172408	0.482262
yibT	0.216801	0.482262
yidK	0.150122	0.482507
hemX	-0.35158	0.482912
yadN	-0.177032	0.483103
appC	-0.241685	0.483709
rhtC	0.24576	0.483709
yddL	0.146817	0.483709
metH	0.29263	0.484497
hflK	-0.194124	0.484981
ybhS	-0.170053	0.484981
ynjE	-0.190181	0.484981
ypjF	0.157985	0.484981
ydbH	0.114343	0.485139
yeiR	-0.142512	0.485139
yjfZ	0.153672	0.485139
yjeS	-0.159169	0.485724
tbpA	-0.215275	0.486436
cof	0.149523	0.487217
deaD	-0.394157	0.487217
ydaT	-0.130161	0.487217
yfcE	-0.195563	0.487217
yibN	0.200859	0.487695
bglA	0.187051	0.488195
btuE	-0.197863	0.488195
dusC	-0.262296	0.488195
pbpC	-0.221888	0.488195
ydcH	0.162709	0.488195
ybdH	-0.143577	0.488814
yliC	-0.22665	0.488814
dgt	-0.214912	0.489311
dinG	-0.271208	0.489311
yceH	-0.17501	0.489457
pncB	-0.201123	0.490073
yqfE	0.22955	0.490343
ulaB	-0.156001	0.491731
ygjQ	-0.152862	0.491995
lrp	-0.741946	0.49599
yddE	0.144145	0.49599
ycbY	-0.199039	0.496061
ydjO	-0.201961	0.498474
soxS	0.133068	0.498674
ycaR	0.439579	0.498825
yaiV	0.125805	0.499647
thrC	-0.159044	0.50031
glgB	0.255774	0.50047
citT	-0.203566	0.50094
nudG	-0.15461	0.50094
ydiJ	0.203016	0.501205
yeaL	-0.183135	0.501582
gudX	0.133842	0.502508
pdxK	-0.148479	0.502508
yigA	0.219297	0.502839
ybgP	-0.209922	0.504197
ydaM	-0.126292	0.504197
ydjG	-0.158458	0.50489
gltI	-0.155743	0.507099
hycI	0.15854	0.507099
ydbL	0.118726	0.507551
elaD	-0.19378	0.507971
fabF	-0.232942	0.507971
glcB	0.179289	0.507971
phnJ	-0.20114	0.507971
ubiB	1.11042	0.507971
yagX	0.153051	0.507971
ycbU	-0.235668	0.507971
yodA	-0.228982	0.507971
truA	0.953298	0.50831
crl	0.184695	0.50869
glnD	1.97589	0.509434
exo	0.144754	0.509524
iadA	0.249614	0.509524
livK	0.196677	0.510003
nanA	-0.146116	0.511409
yfcR	-0.187237	0.511409
yggH	0.229906	0.511409
ydbC	0.195756	0.511688
artJ	-0.194269	0.514417
cueR	0.119797	0.514417
torA	0.131747	0.515028
yaeI	-0.179591	0.515028
yliJ	-0.178806	0.515309
acrF	-0.162085	0.515681
evgS	-0.135268	0.515681
glgA	-0.203113	0.515681
cysD	0.308719	0.516604
hcaD	-0.179375	0.516604
yfeG	-0.128337	0.516745
hyfG	-0.125096	0.516866
yhaL	-0.198729	0.517122
cysG	0.696254	0.517256
pnuC	-0.232562	0.517292
hisQ	-0.190891	0.519632
hyfJ	-0.197297	0.519632
yfdM	-0.130333	0.519632
yzcX	0.320033	0.519632
yeaH	0.138098	0.519643
ydeQ	0.137461	0.519767
cadC	-0.173373	0.52098
alr	0.130121	0.522109
glmM	0.599832	0.522853
rtcB	-0.192327	0.523138
entE	0.132113	0.523509
kdpB	-0.24141	0.523509
rsgA	3.69987	0.523509
ybgA	-0.157426	0.523509
ynjD	-0.180303	0.523509
ascG	-0.162372	0.523941
recB	0.510794	0.523941
yqiG	0.139502	0.523941
tdcF	0.196265	0.525354
yqcD	0.112644	0.525354
speC	0.159579	0.525487
ygcR	0.157482	0.526373
ygiT	-0.17774	0.527128
ybjX	-0.190145	0.527363
fimZ	0.121801	0.528239
hybA	0.163876	0.529072
ompA	0.666166	0.529072
yghU	0.152439	0.529072
yncJ	0.145326	0.529072
hha	0.131977	0.529155
nagA	0.119564	0.529155
ompL	0.159961	0.529155
paaD	-0.129678	0.529155
sufC	-0.156719	0.529155
yhdL	0.132798	0.529155
rsxA	0.206345	0.529695
chbC	0.152521	0.530676
dbpA	-0.150269	0.530676
yqaA	0.138352	0.530676
fliA	-0.214834	0.530731
intS	-0.136533	0.530731
hyaB	-0.283522	0.531911
agaV	-0.178198	0.53197
ymfL	-0.259898	0.532107
pntA	0.178805	0.533788
ydaN	0.115672	0.533788
yjdI	0.164405	0.535138
apt	0.136423	0.535685
rsxE	0.200579	0.535685
ssnA	0.143219	0.535685
ybeX	-0.343266	0.535685
ydfC	0.119454	0.535685
yjeB	0.288546	0.535685
mobB	-0.178595	0.535864
plsX	-0.280196	0.535864
smg	-0.142025	0.535864
yhhW	0.171052	0.535864
yihD	0.199605	0.53632
ssuB	-0.331759	0.537017
nrdI	0.141402	0.537655
ygcW	0.140761	0.538406
ygcO	0.13804	0.538428
yciQ	-0.176814	0.539143
sodB	-0.200886	0.539326
yhfX	-0.135114	0.540003
csgE	-0.217801	0.540383
nanR	-0.14011	0.540928
ygdQ	0.121061	0.541989
ybcN	0.12602	0.54226
ygfF	0.172478	0.54226
yfdP	0.181494	0.542264
yjgH	0.158322	0.544168
yihS	0.21101	0.544361
allD	0.113471	0.544834
gdhA	-0.175846	0.544834
pntB	0.153042	0.544834
slt	-0.185607	0.544834
yajL	0.128981	0.544834
ycjM	-0.123578	0.544834
cspH	-0.120938	0.545649
ppdD	-0.230377	0.545649
prfC	-0.402289	0.545649
yggW	-0.188075	0.545649
yjbI	0.146411	0.545649
tldD	-0.16886	0.545719
yfdL	-0.181187	0.545719
ypfN	-0.158114	0.545719
fliJ	-0.320961	0.545985
pepP	0.173958	0.545985
ydfB	0.124201	0.545985
yrbB	-0.180456	0.545985
yebK	-0.16558	0.546021
purN	-1.37491	0.546138
galT	-0.127245	0.546548
mppA	-0.140315	0.547244
yqgA	0.149851	0.547322
mdoG	0.182096	0.547809
ppx	0.186951	0.547809
trxA	0.295181	0.547809
yggE	0.151037	0.548204
yoaH	0.109387	0.548426
dgoD	0.207662	0.549552
dsbG	-0.128089	0.549552
yhiQ	0.170342	0.549552
ypdC	-0.176682	0.549552
ugpE	0.151298	0.54979
ydaS	0.121124	0.54979
ydjH	0.219546	0.54979
yihN	-0.168626	0.550101
mrcB	0.327445	0.550875
fucI	0.178682	0.553107
hyuA	0.125635	0.553107
yqiC	0.26233	0.554995
hyfI	-0.184449	0.555036
ymdC	-0.163114	0.555036
bioC	1.26793	0.557311
ychF	0.447501	0.557311
yjiE	0.152455	0.557311
ypdH	-0.121623	0.557311
treB	-0.132671	0.55839
yphE	-0.198332	0.55854
ydgT	0.186692	0.55863
yidX	0.179336	0.55863
[truncated: 1,525 more rows]

## Sheet: poor-FUDR - log2 and pval
Gene name	log2FoldChange	FDR adj pval
upp	8.5123	6.90022e-169
rfaC	1.80708	7.48002e-53
yjjG	-4.31905	2.29721e-49
rfaF	1.50684	2.95374e-48
hflD	3.59177	1.50944e-46
atpG	2.02661	1.55911e-43
rfaD	1.81418	8.88192e-37
uraA	1.69562	1.22765e-35
purR	-1.44248	1.09497e-29
apaH	1.22834	3.28337e-26
rfaE	1.45889	1.03367e-23
gmhB	1.81387	1.25703e-22
pitA	1.33123	2.04099e-22
metL	-1.47365	3.08866e-19
lpcA	1.80503	9.90128e-18
yahM	0.999408	1.14296e-16
rfaG	0.787224	1.69671e-13
ppc	1.72381	2.35458e-13
ybaD	0.951113	2.35458e-13
surA	0.95995	2.8943e-12
yahO	0.794348	3.86079e-12
prpE	0.763666	1.29466e-11
dcd	-1.78161	4.98974e-11
rimI	-1.891	5.67621e-11
yahF	0.900387	7.22909e-11
yahC	0.750736	8.94199e-11
galF	-0.93331	1.16955e-10
yahJ	0.938938	2.16088e-10
cytR	0.970231	2.24071e-10
prpR	0.929386	3.87002e-10
yhbH	-1.16769	6.85261e-10
yeaG	-1.08216	7.17784e-10
prpB	0.750519	7.40158e-10
nadB	4.09398	9.15173e-10
wcaF	-0.705727	1.50454e-09
rnhA	1.67622	1.66437e-09
yeeA	-0.813237	2.00951e-09
pepA	0.800724	3.25691e-09
yeeF	-0.860835	4.24368e-09
wcaD	-0.640633	4.74309e-09
exbD	1.40468	6.19669e-09
hisA	-0.812768	6.19669e-09
sapC	1.02603	2.54118e-08
eda	1.00218	3.71126e-08
pyrI	-1.41151	4.24877e-08
proC	0.624013	6.81724e-08
ycbJ	-2.03984	6.81724e-08
yefM	-0.837729	6.81724e-08
znuB	-0.680713	7.20686e-08
yeeD	-0.951221	7.58173e-08
wbbH	-0.731	7.84182e-08
aspC	1.71912	8.99887e-08
hisH	-0.789773	1.41585e-07
nudD	-0.65091	1.47557e-07
mdtA	-0.698349	1.68402e-07
yeeW	-0.755812	2.00637e-07
hisF	-0.820507	2.32911e-07
ycdC	-1.08544	2.58623e-07
exbB	1.23551	3.70287e-07
yidH	0.708575	4.36683e-07
wcaI	-0.70568	4.74482e-07
wbbI	-0.727891	5.41796e-07
deoR	-1.13721	5.54559e-07
rfbC	-0.714494	5.54559e-07
yahI	0.66625	7.72996e-07
yeeS	-0.701031	9.77836e-07
yidG	0.649644	1.04002e-06
pykF	0.553571	1.05638e-06
gshA	0.79534	1.07294e-06
ftsX	1.81639	1.51778e-06
sbmC	-0.707451	1.51778e-06
ycgY	-0.662427	1.70838e-06
yeeN	-0.768059	1.72071e-06
dadA	-0.792712	1.87702e-06
wcaE	-0.651645	2.13983e-06
rpoZ	0.588067	2.31309e-06
yhiP	0.591969	2.34783e-06
cobS	-0.794503	2.57943e-06
thiI	3.42551	2.68513e-06
tdk	-1.13778	2.85826e-06
hdeA	0.756856	2.88752e-06
rfbX	-0.660965	2.93253e-06
yeeT	-0.829146	3.27852e-06
sbcB	-0.68015	3.75009e-06
intF	0.749562	4.08545e-06
gadW	0.785627	4.61845e-06
ycfL	-0.619451	4.62676e-06
yhhF	0.877149	5.46077e-06
cobU	-0.734638	5.97207e-06
yhjD	0.708774	6.2848e-06
yoeA	-0.738311	6.2848e-06
wcaL	-0.657598	6.5849e-06
flu	-0.793897	6.62139e-06
atpC	0.88709	6.71442e-06
yedV	-0.760132	6.82205e-06
yoeF	-0.815516	6.8465e-06
wbbK	-0.705327	7.10573e-06
secG	1.50756	7.61741e-06
yeeR	-0.756285	7.73891e-06
betB	0.600058	8.48498e-06
yahB	0.535807	8.95586e-06
yahA	0.574255	9.3577e-06
cheR	-0.502044	9.71898e-06
recG	-0.638072	1.22032e-05
yfgL	0.828786	1.37596e-05
yedI	-0.745763	1.45006e-05
slp	0.625478	1.66581e-05
yeeZ	-0.758062	1.92691e-05
wzxC	-0.792726	2.00498e-05
ykgJ	0.64472	2.30595e-05
ddlA	0.514006	2.68094e-05
fepG	2.90217	2.68094e-05
ykfC	0.641923	2.88327e-05
nac	-0.757835	3.05427e-05
wbbJ	-0.678691	3.12286e-05
yoeB	-0.739757	3.14607e-05
torY	-0.474582	3.3393e-05
rfbD	-0.684763	3.39613e-05
yeeU	-0.648708	3.4914e-05
treF	0.713856	4.00563e-05
rfbB	-0.670443	4.27112e-05
ybcF	0.581277	4.3134e-05
zur	0.665943	4.3134e-05
dsbB	1.04077	5.2332e-05
prlC	0.601612	5.71992e-05
xylF	0.49628	5.71992e-05
cpsB	-0.583556	6.20622e-05
wcaJ	-0.643031	6.20622e-05
yagL	0.706276	6.20622e-05
yebU	-0.467446	6.20622e-05
mdtC	-0.557396	6.35531e-05
yebS	-0.461579	6.425e-05
gor	0.492293	6.46766e-05
yegE	-0.577447	7.05507e-05
secB	0.87364	7.10091e-05
ykgG	0.510452	7.3253e-05
epd	-2.53068	7.43318e-05
dhaH	-0.834494	7.86243e-05
gntY	1.50745	7.86243e-05
dacD	-0.659953	8.19828e-05
fldB	0.512435	8.52206e-05
hisI	-0.722355	9.36682e-05
rfbA	-0.923493	9.80131e-05
ykgI	0.577099	0.000104559
sapD	0.822816	0.000112201
mmuP	0.730236	0.00011357
wzc	-0.559336	0.00011357
yeeE	-0.783885	0.000116134
pepT	-0.706472	0.000122372
potB	-0.563966	0.000124681
shiA	-0.635384	0.00013409
yahE	0.53062	0.00013409
cld	-0.635168	0.000149444
fnr	0.563396	0.000149444
minE	-0.822362	0.000149444
yedK	-0.599249	0.000149444
yiaV	0.541443	0.00014965
yoeE	-0.656214	0.00014965
wza	-0.509812	0.000157303
clpA	-0.709747	0.000164777
fucR	0.507062	0.000165553
yhjE	0.677396	0.000166035
pgm	1.01837	0.00016854
iscA	1.02816	0.000172078
ptsN	0.70652	0.00017504
yfcU	-0.589793	0.00017504
yhjG	0.579041	0.00017504
wzb	-0.582621	0.00017603
ylbF	0.545846	0.000179274
wcaA	-0.550361	0.000180512
ycfX	-0.778644	0.000183205
ybaK	0.527537	0.000204357
yobA	-0.488785	0.000208321
yagJ	0.665278	0.000214373
tar	-0.78844	0.000214688
ymgH	-0.581433	0.000221277
yeaW	-0.432332	0.000240108
hupB	0.530066	0.000258155
ylaC	0.495172	0.000262828
yiaL	0.479032	0.000264056
wcaB	-0.561771	0.00026477
yiaY	0.46346	0.000266907
yeeY	-0.689438	0.000274878
hlyE	-0.603249	0.000274998
sodA	1.51165	0.000290942
sapF	1.25452	0.000294136
ycgV	-0.585712	0.000294645
yodC	-0.668218	0.000294645
cobT	-0.610024	0.000303055
gmd	-0.700004	0.000308902
znuA	-0.694748	0.000308902
relA	1.36882	0.000319996
manY	-0.456667	0.000325913
baeR	-0.530752	0.00033603
yaiE	0.436751	0.000341285
ykgA	0.59022	0.000343378
yhhH	0.624142	0.000389265
ymfO	-0.704836	0.000394482
yebZ	-0.448969	0.00041582
fucO	0.441174	0.000426079
yahK	0.427104	0.000429716
araE	0.460875	0.000443169
ybbW	0.437115	0.000443169
nuoH	-0.451455	0.000453037
ybbY	0.463541	0.000453297
hisC	-0.564708	0.000514922
hypD	0.630624	0.00053665
yhjB	0.56455	0.00053665
ptsP	-0.560356	0.000543316
ychM	-0.542907	0.000547366
lit	-0.5495	0.000548268
sbcC	0.423624	0.000548268
ycgL	-0.50672	0.000548268
yhhJ	0.523954	0.000550444
ychP	-0.588204	0.000560212
yagF	1.46567	0.000563308
yhjX	0.543909	0.000563308
plsB	1.2797	0.000571253
chaA	-0.609862	0.000573769
fliY	-0.709133	0.000573769
intE	-0.587456	0.000593182
hdeD	0.621162	0.000593605
hyi	0.467947	0.000594082
wcaK	-0.693269	0.000602506
nikB	0.521944	0.000611978
hinT	-0.668968	0.000626888
rnb	0.868024	0.000630208
yiaK	0.44317	0.000652448
ycgJ	-0.552523	0.000661172
ycgK	-0.511336	0.000686068
fliF	-0.650668	0.000687325
dppA	0.542379	0.00069275
yedR	-0.627849	0.00069275
hisD	-0.537247	0.000698292
xylA	0.518922	0.00075536
yibG	0.443301	0.00076548
ygfA	-1.32996	0.000784261
yhjK	0.621114	0.000796649
ykfH	0.524051	0.000809815
tonB	1.33291	0.000816791
ugd	-0.974935	0.000837607
yedX	-0.616679	0.000841493
yegU	-0.593287	0.000841493
kbl	0.518755	0.000846818
ykgC	0.501178	0.000846818
ygeH	0.430337	0.000848476
trpC	3.30668	0.000867041
rnc	6.69967	0.000886107
sixA	0.522289	0.000886107
sapB	0.829513	0.00094463
mdtB	-0.566812	0.000952186
yebB	-0.389119	0.000964526
ymfB	-0.56093	0.000967512
ygcQ	0.480589	0.000967966
yegJ	-0.500983	0.000974653
sufB	-0.567814	0.00104126
cheB	-0.442552	0.00105192
frsA	0.489633	0.00106669
ogrK	-0.455179	0.00113015
tesB	0.436401	0.00113015
nuoN	-0.463862	0.00118854
pphA	-0.380887	0.00119154
ftsE	2.36787	0.00120631
yagV	0.504507	0.00120631
yqeF	0.408199	0.00120631
ldcA	0.538552	0.001215
yhbG	-0.59357	0.00126607
lon	0.616439	0.00131246
yhiF	0.528385	0.0013437
yqeJ	0.404099	0.00141943
dcm	-0.555196	0.00146401
rdgC	0.402154	0.00155795
yhhL	0.515077	0.00158043
ydjR	-0.546677	0.00158826
ygeI	0.406047	0.00158826
npr	-0.592229	0.00161112
glf	-0.657799	0.00161531
yoaB	-0.376367	0.00164684
fliG	-0.591998	0.00171073
aroL	0.477753	0.00171794
yiaF	0.576461	0.00171794
cusC	-0.569557	0.0017297
betT	0.413992	0.00174037
ycgG	-0.474217	0.00174876
sgbE	0.440817	0.00175271
ylbG	0.402466	0.00181472
manX	-0.439456	0.00187729
cyoA	0.396005	0.00196381
dos	0.399005	0.00199627
gcl	0.437663	0.00199627
ycgN	-0.50956	0.00199627
yoaA	-0.365149	0.00215603
malS	0.443162	0.00220587
ybbD	0.403323	0.00221648
yqcD	0.377658	0.00223274
clpX	0.564107	0.00224828
ynfM	-0.536362	0.00226948
tag	0.500356	0.00227
yhjA	0.560578	0.00227769
nadC	2.98645	0.00229034
yiaM	0.450057	0.00230416
crr	-0.833896	0.00232123
yqeA	0.422019	0.00233334
yagB	0.704432	0.00234577
yhiR	0.500389	0.00234577
yiaA	0.506422	0.00235381
yedZ	-0.539063	0.0023889
yaiA	0.370834	0.0025108
ycgE	-0.43297	0.00252092
yecE	-0.357921	0.00252092
yoaE	-0.441617	0.00252092
yeeJ	-0.557485	0.0025875
selB	0.4942	0.00266435
potD	-0.469143	0.0026652
umuD	-0.591396	0.00267373
yhiD	0.51404	0.00268025
ydcY	0.423797	0.00272821
tauC	0.371592	0.00273477
mfd	-0.60278	0.00282547
ybaA	0.435167	0.00294778
yebN	-0.356954	0.00294778
endA	0.492213	0.0030354
minC	-0.951497	0.0030565
phoR	0.530698	0.003156
afuC	0.566086	0.00316108
ihfB	-0.842271	0.00316939
mcrA	-0.510549	0.00329339
rssA	-0.662339	0.00342064
yfdH	-0.45151	0.00342495
mak	0.375131	0.00347937
yecG	-0.617817	0.00347937
kduI	0.379571	0.00348226
yebE	-0.361705	0.00348226
lacA	0.39589	0.00360539
yecM	-0.344425	0.00365061
yqeK	0.42868	0.00365895
yqcB	0.429214	0.00369581
cbl	-0.521883	0.00372844
ppiD	0.425004	0.00373712
rhlB	0.645224	0.00379093
bcsG	0.503842	0.00384538
yagQ	0.447286	0.00394462
cvrA	-0.436959	0.00400361
yrfB	-0.547572	0.00401221
rpmB	3.01587	0.0041168
narK	-0.510658	0.0041244
yeaP	-0.351214	0.0041244
arsB	0.52711	0.00415805
narV	0.409759	0.00419193
rrmA	-0.394054	0.00419193
intD	0.371155	0.00421566
oppB	-0.510896	0.00421566
yagH	0.77036	0.00421566
cueR	0.364017	0.00436831
ykgH	0.413242	0.00436831
xylG	0.421749	0.00436937
alkA	-0.467694	0.0044325
yggS	-1.50638	0.0044325
hchA	-0.495584	0.00443547
hlpA	0.553822	0.00445436
vsr	-0.447632	0.00445436
yajQ	0.35205	0.00445436
ysaB	0.366743	0.00445436
mhpR	0.383155	0.00449856
yqgC	-0.904519	0.00449856
rbbA	0.450863	0.00450567
rfaJ	0.407823	0.00450567
ybbA	0.356603	0.00450567
ykgF	0.476243	0.00450567
ymfN	-0.662511	0.0045784
ykfA	0.528594	0.00457911
yeaX	-0.348882	0.00463034
yhiL	0.414319	0.00480315
dcuA	0.553927	0.00487792
ndh	-1.90918	0.00489102
rfaQ	0.378577	0.00499408
yiaJ	0.422075	0.00499408
ydhB	-0.539912	0.00512488
ykgL	0.440461	0.00513321
yegT	-0.411227	0.00524459
yhiN	0.386394	0.00524459
mhpE	0.374675	0.00532089
sdaA	-0.348334	0.00538568
yobB	-0.332947	0.00538954
tas	0.390124	0.00539603
yhiJ	0.483706	0.00539603
mdtE	0.453694	0.00553133
ycgX	-0.514924	0.00553133
cheZ	-0.342618	0.00553281
bcsF	0.482823	0.00555094
fliC	-0.594818	0.00555094
ydeN	0.392122	0.00555094
ligB	0.440938	0.00555658
yebT	-0.374075	0.00556165
entD	0.480301	0.0055655
yaiX	0.358254	0.0055655
yebQ	-0.341493	0.0055655
yegD	-0.400974	0.0055655
yagE	1.08379	0.00557578
ybjK	-0.597988	0.00557578
yeaY	-0.329038	0.00557578
yaiF	0.420876	0.00566522
yeeP	-0.557797	0.00569521
yoaG	-0.328601	0.00570084
hdeB	0.500047	0.00571885
yjgF	0.589791	0.00571885
maa	0.373219	0.00580706
astA	-0.42735	0.00605619
cysD	0.866705	0.00605619
ymfI	-0.462844	0.00605619
yodB	-0.453051	0.0060732
fucU	0.371507	0.00611837
lysS	1.54419	0.00613647
gadC	0.364981	0.00616024
dhaR	-0.511327	0.00627346
hda	-5.3593	0.0063273
yobF	-0.331821	0.00637462
yqeI	0.37262	0.00637462
ydgH	0.462947	0.00642149
yjjY	-2.38474	0.00658244
yhjY	0.405488	0.00659598
trkA	0.839139	0.00660907
yiaW	0.485998	0.0066944
yfcS	-0.50392	0.0066989
ykiA	0.34493	0.00675245
narJ	-0.541473	0.00675686
yedJ	-0.493444	0.00682776
nupC	0.378034	0.00684006
yoaD	-0.330883	0.00684006
prpD	0.44476	0.00685239
yddL	0.394088	0.00687174
yfcE	-0.573227	0.00687174
arsR	0.428772	0.00694686
yajD	0.393517	0.00700005
folX	-0.501804	0.00702239
emtA	-0.546412	0.00702805
ugpC	0.48191	0.00702805
nikR	0.512057	0.00709025
yicC	0.340728	0.00722803
pqqL	0.411235	0.00729604
gatD	-0.395699	0.00739391
proY	0.355198	0.0074
yecO	-0.33619	0.00755756
ymfH	-0.486263	0.00755756
ydeO	0.375534	0.00757914
azoR	0.377075	0.00764455
ppdA	0.454366	0.00768106
dnaB	1.1652	0.00768877
yibJ	0.351846	0.00773183
ymgA	-0.485978	0.00781812
narG	-0.532205	0.00807531
acrR	0.368467	0.00813076
yaiP	0.378373	0.00814712
xylB	0.423506	0.00816473
yaiY	0.367675	0.00817386
narL	-0.527707	0.00825555
glpG	0.388306	0.00828017
oppD	-0.511738	0.00828017
yegS	-0.381532	0.00828017
yobH	-0.354278	0.00833147
ymfC	-0.487864	0.00834354
yhiQ	0.499513	0.00843141
yedY	-0.522251	0.00844536
ygcW	0.408332	0.00846902
sdhD	0.320249	0.00851159
holE	-0.325242	0.00852306
nuoJ	-0.402224	0.00856676
ygdR	0.379553	0.00871172
dppF	0.508973	0.00897617
eutA	-0.388715	0.00898816
yegP	-0.385753	0.00898816
yghK	0.382525	0.00904836
bioB	5.87006	0.00911155
yfaE	-1.34371	0.00925515
yeeX	-0.765584	0.00930867
cysW	0.359843	0.00945273
yecJ	-0.515262	0.00945273
yeeI	-0.42676	0.00945273
potA	-0.488684	0.00948664
ycfZ	-0.47836	0.00964254
ygfY	0.604893	0.009932
radA	0.390428	0.0101032
yeaS	-0.317825	0.0101032
yaiL	0.444971	0.0102872
ydbL	0.326934	0.0103495
yfcC	-0.517669	0.0104342
sfmA	0.409485	0.010461
ygbA	0.442779	0.0107355
yegR	-0.359247	0.0109198
yfbO	-0.396966	0.0111288
ycfT	-0.427183	0.0112606
uhpC	0.394842	0.0114839
ykfG	0.480853	0.0114914
yegL	-0.39549	0.0115102
ybbV	0.313684	0.0115487
yegQ	-0.358271	0.0115487
ygeL	0.335707	0.0115487
fliO	-0.529874	0.0115901
ymfA	-0.425751	0.0116901
yoaC	-0.305595	0.0116901
pykA	-0.306035	0.0117198
bdm	0.372392	0.0118383
pcm	0.387913	0.0119659
yagY	0.398788	0.0120304
ybaM	0.362024	0.0120827
afuB	0.523584	0.0122314
sufA	-0.474645	0.0122565
yeeV	-0.47023	0.0122777
yeaT	-0.306308	0.0122956
yqcA	0.405298	0.0122956
yrbG	-0.627529	0.0123891
minD	-0.681625	0.0124605
ddpD	0.416913	0.012509
yaiW	0.370273	0.012509
nikA	0.417916	0.0125408
yebO	-0.345684	0.0127491
ycbY	-0.550791	0.0128133
dcrB	0.416918	0.012887
yhiK	0.483776	0.012887
fliH	-0.52686	0.0131029
yrhB	0.465032	0.0131029
proA	0.488627	0.0131539
fliN	-0.524756	0.0131938
yohN	-0.367131	0.0135194
sufC	-0.462328	0.0135375
cyoB	0.303604	0.0136622
yhjV	0.417905	0.0136622
erfK	-0.435245	0.0137275
cutC	-0.306538	0.0137743
yhjJ	0.417394	0.0138665
bcsC	0.421693	0.0138787
yaiZ	0.340769	0.0141516
yagW	0.485788	0.014188
yegH	-0.426887	0.014188
mviM	-0.407181	0.0142638
aldB	0.357726	0.0145806
yniA	-0.481882	0.0147529
gatC	-0.489364	0.0147664
rimJ	-0.493196	0.0147664
yehS	-0.393913	0.0147664
yibD	0.338266	0.0147664
yjbR	0.380387	0.0148717
ymfG	-0.388816	0.0150038
wcaC	-0.392123	0.0151
nuoG	-0.334092	0.0151186
ygcI	0.408973	0.0151186
ygcF	0.351418	0.0151835
yebG	-0.327314	0.015396
yibA	0.368235	0.015396
yohM	-0.439771	0.015396
rhsE	0.356963	0.0154884
pnp	0.890478	0.0159716
sbmA	0.315758	0.015983
rffH	-0.455266	0.016009
ybaE	0.342726	0.016009
yfcI	-0.465426	0.0160724
betA	0.32782	0.0160772
yncJ	0.383001	0.0163194
acpT	0.444182	0.0163267
adhP	0.355921	0.0163267
ybaY	0.344946	0.0163342
fliS	-0.524687	0.0163408
rnd	-0.379272	0.0163408
yiaO	0.333421	0.0164891
frmB	0.421893	0.0164907
ykgE	0.431862	0.0167563
ybbM	0.384856	0.0167604
ygcN	0.326782	0.0169619
exoX	-0.310119	0.0170699
yfcD	-0.405859	0.0170699
nikE	0.469248	0.0171784
tiaE	0.363842	0.0171784
yeaM	-0.287337	0.0172623
ykgM	0.293337	0.0173067
yahD	0.315282	0.0173753
mrcA	0.394205	0.0173824
flhA	-0.28935	0.0173953
menF	-0.456788	0.0173953
oppC	-0.437957	0.0173953
ykiB	0.30312	0.0173953
ybjS	-0.521792	0.0175268
nuoE	-0.381073	0.0175453
astD	-0.468548	0.0176857
xdhB	0.344289	0.0176857
yedA	-0.550492	0.0176984
ymgF	-0.375614	0.0177549
gpt	0.627061	0.0178013
ybbB	0.338343	0.0180685
torZ	-0.285165	0.018079
ybbC	0.344315	0.018079
selA	0.399041	0.0181921
edd	-0.321013	0.0186555
yahL	0.298071	0.0186568
gsk	0.338611	0.0188089
yhhZ	0.462503	0.0188089
yqgA	0.401666	0.0188089
acnB	0.74485	0.0189998
yddB	0.358768	0.0189998
yhhY	0.412861	0.0190116
araJ	0.350739	0.0191313
flgK	-0.602781	0.0191313
yhjR	0.385849	0.0192124
yjdA	0.435326	0.0192124
sufD	-0.421734	0.019485
ykfB	0.396334	0.0195649
cynS	0.318353	0.0196819
yddJ	0.333106	0.019709
ybbL	0.298572	0.0198403
ycgF	-0.358996	0.0198403
ygeQ	0.301372	0.0198403
ykgN	0.533949	0.0198403
yohH	-0.331173	0.0200197
flgN	-0.462274	0.0201811
livF	0.414429	0.0202621
ydeP	0.378346	0.020273
yecP	-0.284311	0.0203042
yagG	0.841437	0.0203545
yebK	-0.471873	0.0204199
ychQ	-0.445978	0.020574
yjeF	1.08935	0.0209487
yeaR	-0.294312	0.0210146
dinD	0.325238	0.0211583
ompR	1.29863	0.0214904
yfcX	-0.4318	0.0216643
yddW	0.329646	0.0217503
ygeR	0.287096	0.0217503
yhhN	0.43492	0.0220933
xylR	0.337951	0.0221469
frmR	0.310841	0.0224028
chbR	-0.449433	0.022426
leuC	-0.400757	0.022501
psiF	0.341832	0.0225322
ykfF	0.431173	0.0225322
ysgA	-0.69584	0.0226203
sgbH	0.312007	0.0227905
fecD	0.346794	0.0228311
flk	-0.464218	0.0228349
fhiA	0.399042	0.0231258
rfaH	0.401379	0.0231258
atpA	0.405804	0.0236518
astE	-0.407453	0.0237066
dadX	-0.479476	0.0237066
fliQ	-0.443195	0.0237066
ygeF	0.306522	0.0237066
yhhT	0.40998	0.0239915
osmC	0.358303	0.0240567
gudD	0.350214	0.0241299
yagP	0.484636	0.0241299
mipA	-0.478537	0.0244029
ygeK	0.308346	0.0245915
gntR	0.513411	0.0248437
ycgH	-0.559448	0.0250647
yidI	0.329918	0.0251564
allB	0.366659	0.0252747
yfiQ	-0.445942	0.0253093
flgF	-0.615921	0.0253233
pgi	0.677317	0.0253438
yccZ	-0.60881	0.0262564
ydeQ	0.333957	0.0267898
yegW	-0.352949	0.0269709
yncC	0.343713	0.0269709
proQ	0.366898	0.0271399
uspA	0.33467	0.0274354
fliP	-0.497442	0.0275268
hokA	0.350646	0.0275268
rfaI	0.285809	0.0275268
yagN	1.0633	0.0275268
mdoD	0.382127	0.0275783
yciO	-0.491157	0.0275783
ygdI	0.476543	0.0278041
purT	-0.284306	0.0278913
ychN	-0.426246	0.0278913
yibH	0.32139	0.0279865
argA	0.267557	0.0283199
rfaL	0.346969	0.0283984
pepD	0.434065	0.028484
ycfP	-0.448285	0.028484
flgD	-0.49147	0.0284922
hypF	0.403538	0.0286738
kdpF	-0.489578	0.0286738
mntH	0.338743	0.0286738
recJ	0.266238	0.0286929
yzgL	0.547097	0.0287229
ydcA	0.359511	0.0287803
tpr	-0.434055	0.0288266
yedF	-0.393208	0.0289309
yggV	0.441769	0.0290961
ydiR	-0.446494	0.0293129
pheP	0.290194	0.0294015
flhB	-0.267244	0.0294922
yfbU	-0.455147	0.0294922
fbaB	-0.312711	0.0299328
sdaC	0.38376	0.0299355
yodD	-0.459976	0.0299355
rbsD	-0.459428	0.0300963
potC	-0.356041	0.0302177
chbF	-0.455374	0.0303331
cspG	-0.345593	0.0303331
cspC	-0.275931	0.0303362
glxR	0.348068	0.0306205
flgC	-0.45474	0.0307348
ybgE	-0.333669	0.0307691
yhbX	-0.506658	0.030925
yfbR	-0.358566	0.0310094
ygeV	0.304029	0.0310338
yagU	0.434745	0.0310685
ydiQ	-0.473567	0.0313327
yiaC	0.387082	0.0313327
sdhC	0.266158	0.0313465
prpC	0.336376	0.0315381
uvrC	-0.532879	0.0316907
hypC	0.490466	0.0318054
nadR	-0.624326	0.0319352
bcsZ	0.440918	0.0320499
zapA	0.330089	0.0320499
yfeT	-0.300902	0.0321284
fliM	-0.504421	0.0323092
icdC	-0.371166	0.0323092
gltA	-0.430419	0.0328924
yejB	-0.383567	0.0328924
yfgB	-0.627608	0.0328924
fucK	0.32622	0.0329039
gltP	0.331314	0.0329039
ykfJ	0.365368	0.0329039
cynR	0.351364	0.0329133
alkB	-0.365826	0.0330166
ygcB	0.326217	0.0330166
ybbS	0.275284	0.0332338
yneL	0.332514	0.0332338
grxC	0.388624	0.0337369
ycgR	-0.396304	0.0338112
glxK	0.298843	0.0340184
ylbH	0.290277	0.0340184
tauB	0.334067	0.0341262
yjgB	0.340707	0.034225
yaiT	0.302888	0.0342533
cpxR	-0.439277	0.0344988
yciG	-0.463942	0.0344988
yddG	0.313401	0.0344988
dppB	0.355448	0.034565
ykgB	0.378908	0.0349411
yeaN	-0.276069	0.0353371
bcsB	0.375064	0.0356111
trg	0.373823	0.0358288
cynT	0.309899	0.0360033
argT	-0.419653	0.0360569
ilvN	0.286703	0.0369667
yagM	0.455556	0.036996
ydcR	0.407769	0.0370228
ynjC	-0.341703	0.0370228
araG	-0.442512	0.0370971
rpmJ	-2.85551	0.0371499
ygeO	0.296711	0.0371499
yqeH	0.307878	0.0372937
renD	0.276293	0.0378153
ampH	0.292583	0.0379159
tesA	0.294616	0.0379159
uup	0.985014	0.0379159
ydjF	-0.417751	0.0379159
ygfM	0.280792	0.0379159
yidL	0.288745	0.0379159
ybbP	0.301696	0.038477
ygfX	0.354081	0.038477
ptr	0.302319	0.0385286
sufE	-0.360593	0.0386485
ybaX	0.276699	0.0386688
hha	0.307317	0.0388334
mhpT	0.307945	0.03888
yeiR	-0.320454	0.0392578
kdgK	0.365254	0.0393443
yfdC	-0.319017	0.0396157
uxaB	0.327978	0.0398967
kdpD	0.509846	0.0407864
dedA	-0.391659	0.0408681
evgS	-0.319349	0.0409093
prmA	-0.379816	0.0409349
yedQ	-0.429293	0.0409349
ccmB	-0.353834	0.0409468
yajR	0.315768	0.0409888
yddK	0.307009	0.0409888
flgE	-0.485777	0.0412655
gudP	0.301233	0.0412655
ybbK	0.284837	0.0415446
pabB	0.531952	0.0416521
ycjM	-0.307666	0.041842
ymfD	-0.364711	0.041842
hrpB	-0.563916	0.0418516
proB	0.346289	0.0419239
yncM	0.287607	0.0421003
glnK	0.334532	0.0422011
gapA	-0.347087	0.0425113
ydiL	-0.432333	0.0432873
mazG	0.343292	0.0433325
ymfM	-0.485113	0.0433325
ydeE	0.291519	0.043489
ydjA	-0.403654	0.0435854
tam	0.275872	0.0435913
nrfD	0.321568	0.043638
yagR	0.486738	0.043638
yiaB	0.3121	0.043638
yddE	0.30913	0.0437864
ydjG	-0.366567	0.0437864
yehZ	-0.442898	0.0444288
ycfR	-0.315768	0.0444942
fhuE	-0.474136	0.0445109
lyxK	0.311258	0.0445109
ycaO	-0.463506	0.0445571
ushA	0.275254	0.0446334
yebY	-0.267435	0.0446334
mmuM	0.548519	0.0446703
ybaO	0.31945	0.0446703
xdhC	0.341849	0.0447789
flxA	0.29485	0.0452732
rbsR	-0.476194	0.0452732
aroM	0.264063	0.0460149
feoB	0.480326	0.0465249
paaX	0.305198	0.0465249
tfaE	-0.337818	0.0465249
ygeP	0.259013	0.0465249
yneG	0.292301	0.0465249
yqeG	0.276506	0.0465249
hypB	0.414998	0.0466108
yehD	-0.340352	0.0468194
rzoD	0.337668	0.0478002
hisB	-0.366295	0.0478762
yaiU	0.337692	0.0481117
yeaB	-0.254053	0.0481117
ydcO	0.319296	0.0482666
ydjY	-0.361179	0.048273
cyoD	0.257708	0.0484156
gudX	0.285677	0.0484156
yagT	0.374217	0.0484156
nikC	0.347243	0.048436
yecH	-0.416261	0.048436
ydeW	0.306201	0.0484431
yfcA	0.384232	0.0484431
ygaQ	0.392396	0.0485009
thiM	-0.348041	0.0488313
yieP	-0.56377	0.0488313
dctA	0.667832	0.0492002
lldD	0.335673	0.0492002
truD	0.330696	0.0492002
adiC	0.361174	0.0494194
ycaK	-0.44083	0.0494989
yfdM	-0.297774	0.0494989
cchA	-0.284593	0.0495587
stfE	-0.40024	0.0495713
ylbA	0.253413	0.0497945
yihN	-0.413883	0.0499015
yncA	0.300396	0.0499015
narY	0.287844	0.050055
yedO	-0.402875	0.0504924
ydcE	0.349936	0.0509049
yaiS	0.258436	0.0516164
treA	-0.376816	0.0517332
deoA	-0.527726	0.0522984
ygbF	0.348711	0.0522984
yfdL	-0.436655	0.0524736
yqeC	0.259558	0.0527484
cyoE	0.246599	0.0536705
yafW	0.335373	0.0536705
nfrA	0.266068	0.0539034
ycfQ	-0.482888	0.0539034
nhaB	-0.34375	0.0546107
yehK	-0.290745	0.0547591
codA	0.262737	0.054776
ddpF	0.307022	0.054776
ymfQ	-0.388291	0.054776
yqcE	0.388667	0.05505
cysK	2.55644	0.0550909
ypdI	-0.303085	0.0552866
fdnI	0.401968	0.0556129
yigI	-0.478168	0.0556129
maoC	0.272885	0.0559771
pabA	0.894552	0.0566057
selD	-0.388391	0.0566171
sgrR	-0.353717	0.0567134
xdhD	0.275512	0.0567134
yidQ	0.290531	0.0567949
allD	0.258018	0.0569435
moaE	-0.467108	0.0572115
ruvA	-0.329619	0.0574789
ftn	-0.345906	0.0575537
yiaG	0.31937	0.0582025
cusS	0.289584	0.0588242
yfbP	-0.321154	0.058943
cchB	-0.316443	0.0589835
ppdC	0.270838	0.0593702
ydaF	0.309961	0.060182
syd	0.264788	0.0604454
ydjL	-0.382017	0.060697
phoB	0.233678	0.0612217
rpoS	0.688727	0.0612335
hipA	0.321207	0.0613251
yecT	-0.249324	0.0613663
yegI	-0.340209	0.0613663
rfaS	0.290207	0.0614076
yeaO	-0.239308	0.0614076
yghO	0.378332	0.0614076
ygcR	0.334142	0.0619977
yeaD	-0.317486	0.0625437
yecC	-0.412607	0.0628862
yohL	-0.353672	0.0628862
ruvB	-0.372886	0.0630917
tehA	0.304615	0.0633938
fucP	0.281638	0.0635163
yebW	-0.24098	0.0635163
ylaB	0.280153	0.0636253
yedM	-0.345799	0.0642785
trkH	0.524468	0.0645258
sra	0.253749	0.0647698
cvpA	-0.732522	0.0650017
yehU	-0.333608	0.0650017
pbl	0.275202	0.0657637
yiaN	0.346094	0.0657637
yliG	-0.444963	0.0657637
yohG	-0.299181	0.0657637
elbA	-0.322129	0.0663175
acrA	0.252144	0.0665689
msyB	-0.453277	0.0668228
seqA	-1.29446	0.0670529
elaA	-0.386936	0.0672012
sdiA	-0.368084	0.0673404
apaG	-0.241993	0.0673528
cheY	-0.256928	0.0673528
potF	-0.573215	0.0674316
mdoB	0.38911	0.0675924
dinI	-0.408269	0.067743
htpG	0.268156	0.067743
ycjN	-0.27035	0.067743
yedE	-0.403244	0.067743
hypA	0.432406	0.0679001
amtB	0.298212	0.068825
yjgA	0.461394	0.0688654
ynjA	-0.346822	0.0691709
yfcF	-0.351892	0.0692845
yggE	0.328188	0.0700869
mdtF	0.289032	0.0704456
fdnG	0.272712	0.0704584
ppx	0.396915	0.0704584
ygeD	0.270335	0.0704584
chpR	0.320022	0.0704751
xapB	-0.30664	0.0706074
ygbJ	0.340605	0.0706074
macB	-0.376406	0.07067
ivbL	0.260937	0.0711196
nagZ	-0.512291	0.0711196
yfbM	-0.342462	0.0711196
yicL	0.27532	0.0711196
yliB	-0.380106	0.0711196
ymgG	-0.413694	0.0711196
ypjD	0.463772	0.0711573
udp	0.455875	0.0711818
ygcE	0.280471	0.0720035
yhcF	-0.289758	0.0734919
ubiD	0.501029	0.073748
yajO	0.272317	0.073748
ycbS	-0.295265	0.0741035
dsrB	-0.405527	0.0742941
livJ	0.418305	0.0743955
acrB	0.25102	0.0745558
cysA	0.283825	0.0747788
flgL	-0.381299	0.0747788
lldR	0.279113	0.0747788
poxB	-0.400154	0.0747788
guaD	0.243789	0.0749996
mioC	-0.506857	0.0749996
hisM	-0.343113	0.0750654
yghS	0.270994	0.0751234
ydcT	0.299558	0.0756507
rof	0.324415	0.0757353
yfdE	-0.259051	0.0757353
ygdQ	0.255604	0.0758215
ycaN	-0.338306	0.0765159
speF	-0.2541	0.0767012
atoC	-0.344378	0.0768161
yjjX	-0.412036	0.0768161
yqfA	0.383541	0.0771896
arsC	0.370611	0.0773647
ihfA	-0.953486	0.0773647
ygfQ	0.25119	0.0773647
allR	0.253513	0.0773745
lpp	-0.496027	0.0773938
usg	-0.333931	0.0773938
tdh	0.292718	0.0774046
yafP	0.330872	0.0774333
yicH	0.244019	0.0774333
yaiV	0.244742	0.0775489
ulaR	-0.37844	0.0777568
ygjE	0.303361	0.0777568
livH	0.378667	0.0779002
sfsB	-0.49158	0.0779002
yebV	-0.22241	0.0779512
feoA	0.366663	0.0780272
nanR	-0.305798	0.078199
xylH	0.332173	0.0788616
yegZ	-0.277974	0.0794131
yeiN	-0.38133	0.0794131
yhdE	-0.318771	0.0794131
ypdH	-0.272191	0.0794131
ydbD	0.319096	0.0798673
ypdJ	-0.284158	0.0798673
alsA	0.302614	0.0799544
tap	-0.377712	0.0799544
cmtA	0.334942	0.0801447
yafX	0.329391	0.0801447
gspA	-0.379549	0.080692
bcsA	0.308572	0.0812824
osmE	-0.338188	0.0813403
hofB	-0.357163	0.0815484
pin	-0.296629	0.081698
yedD	-0.413387	0.082261
yhdJ	-0.289838	0.0824962
pfkB	-0.34062	0.0830202
ygdD	0.272411	0.0833832
yeaJ	-0.322167	0.0834439
ycgI	-0.371809	0.0834833
tdcA	0.498635	0.083907
hokB	0.282168	0.0841019
ygcH	0.291372	0.0841843
yibK	0.257574	0.0842266
dinB	0.336297	0.0847005
proP	0.358497	0.0847005
yhdY	-0.332549	0.0847005
yjiJ	0.362364	0.0847005
nudG	-0.30596	0.0850152
ybiP	-0.334017	0.0850152
nadA	4.08733	0.0851489
acrF	-0.330904	0.0855046
ymbA	-0.32725	0.085785
rtcA	0.36832	0.0858486
yciM	-0.536442	0.0858486
entC	0.257295	0.0859011
yehI	-0.269454	0.085925
cysU	0.248901	0.0863503
ytfA	0.360445	0.0864136
kefC	-0.318952	0.0867646
spy	-0.289875	0.0867646
tynA	0.223242	0.0867646
ytjC	-0.417239	0.0867646
yncI	0.272902	0.0869255
fcl	-0.349941	0.0872616
cyoC	0.219057	0.0877217
rcsA	-0.352204	0.0882299
pflA	0.455411	0.0883429
cpxA	0.542279	0.0883785
ybaN	0.498673	0.0883785
yedW	-0.341434	0.0883785
yfgC	0.406833	0.0888193
yhdH	-0.286806	0.0889686
ygeM	0.230229	0.0891611
fliA	-0.457334	0.0892202
yicI	0.24933	0.0898561
ddpX	0.35775	0.0899768
dppC	0.32259	0.0901056
rplI	0.611014	0.0901398
ycaD	-0.371762	0.0902284
narH	-0.360501	0.0905739
bioH	2.18972	0.0915582
kefF	-0.403379	0.0921292
yijP	0.464433	0.0921292
trmC	-0.388349	0.0922416
yeaA	-0.381063	0.0922416
yncG	0.326277	0.0922416
yjfL	-0.275688	0.0922499
ilvA	-0.388946	0.0922921
yciB	-0.358878	0.0922921
yecI	-0.335058	0.0922921
cedA	-0.340036	0.0924351
yegK	-0.412906	0.0928421
cysN	0.512519	0.0930943
glcC	0.278761	0.0933439
yhjC	0.324019	0.0935285
ymfP	-0.55225	0.0942101
ybfA	0.356983	0.0942663
ydfI	0.276439	0.0944658
ydcF	0.291739	0.0946727
yfdZ	-0.321337	0.0948364
ydeA	0.321945	0.0948701
ykgK	0.328954	0.0951261
fadA	-0.435356	0.0955142
xerC	0.554468	0.0955353
flgI	-0.363435	0.0956426
otsB	-0.378415	0.0956426
hofQ	-0.289583	0.0966943
ycdM	-0.276952	0.0971252
nupG	0.338087	0.0979909
aaeA	-0.33604	0.0981601
torI	-0.269272	0.09818
mdlB	0.274183	0.0982609
ycaC	-0.377083	0.0986364
ydfV	-0.355028	0.0989995
yiaU	0.236142	0.0989995
ypdB	-0.273757	0.0989995
flgG	-0.338018	0.0990016
fliR	-0.361381	0.0991429
ydeV	0.241359	0.0991429
ansB	0.284195	0.100067
ybaB	0.291142	0.100067
bcsE	0.37539	0.100877
galU	0.313765	0.101099
yfcM	-0.31646	0.101379
smg	-0.287525	0.101441
topB	-0.346821	0.101536
ymfE	-0.333485	0.10213
cycA	0.356746	0.102297
gatZ	-0.236805	0.102632
ydcZ	0.290368	0.102734
ydeK	0.274778	0.102734
bipA	0.60052	0.103275
fimG	0.321846	0.103275
stpA	0.272908	0.103275
mobB	-0.356671	0.103373
ydeR	0.266158	0.103402
ynjF	-0.553967	0.103402
ycdX	-0.318498	0.10358
yecS	-0.31939	0.103586
panF	-0.305114	0.104018
smpA	0.352733	0.104036
tolA	0.611607	0.104036
yfbS	-0.335514	0.104036
tauD	0.247876	0.104039
fixA	-0.307503	0.104046
yidF	0.234965	0.104046
mltD	0.373687	0.104093
ycaP	-0.307985	0.104093
yfbN	-0.258995	0.104184
mhpC	0.270383	0.10424
yoaF	-0.212104	0.10424
exuR	-0.300104	0.104373
dppD	0.297401	0.104434
copA	0.258829	0.104464
ybcI	0.263998	0.104464
aroB	1.84925	0.104543
lysU	0.244338	0.104543
yfdF	-0.310425	0.104543
alsE	0.269453	0.104637
kch	-0.332994	0.104637
artP	-0.347769	0.105065
lrp	-1.36238	0.105603
codB	0.22028	0.105744
ybjO	-0.378716	0.105744
yebC	-0.204414	0.105744
ymdC	-0.338029	0.1058
barA	0.239479	0.105866
yajL	0.250937	0.106293
eutB	-0.232312	0.107456
galE	-0.348776	0.108153
gadE	0.368125	0.108436
gcvR	0.391129	0.108436
livG	0.289727	0.108436
ydcS	0.251019	0.110217
yicN	0.235647	0.110217
napF	-0.396028	0.11034
yfcT	-0.293439	0.11034
pbpC	-0.404572	0.110554
eutL	-0.25624	0.110573
smf	-0.239494	0.111047
asmA	-0.422949	0.111225
lar	-0.38826	0.111494
mpl	0.30789	0.111632
hycG	0.304862	0.112
yfeO	-0.223351	0.112
ybcL	0.289299	0.113896
ydcU	0.284655	0.113896
ydjE	-0.391871	0.113896
yoaI	-0.269084	0.113896
yeaU	-0.208508	0.114006
yddH	0.255851	0.114989
yaiO	0.230999	0.115004
gltF	-0.293138	0.115157
yjaH	0.447826	0.115157
agaD	-0.343612	0.115554
fliL	-0.376697	0.115554
prfH	0.312533	0.115554
glgX	-0.360942	0.115685
yjgD	0.281042	0.115917
ybhS	-0.300828	0.116351
yebR	-0.217198	0.116351
yehY	-0.28149	0.116423
ugpB	0.241067	0.116748
nanT	-0.363627	0.116793
ymjA	-0.311447	0.117009
cadB	-0.310532	0.117157
damX	-0.36936	0.117157
livK	0.342013	0.117157
srmB	0.570117	0.117157
yfgM	-0.358078	0.118153
manZ	-0.211428	0.118645
xerD	0.960588	0.118924
tig	0.273334	0.120991
astC	-0.285887	0.121404
pstS	0.431889	0.12181
ackA	2.12026	0.122563
cysI	0.609807	0.122886
ybcJ	0.253001	0.122886
yfbQ	-0.30048	0.12298
ydcM	0.2397	0.124205
leuB	-0.28064	0.124532
xthA	-0.354815	0.125045
eutG	-0.243452	0.125348
mprA	0.24708	0.125348
yehB	-0.254399	0.125348
bolA	0.248908	0.125888
ybaL	0.236263	0.125973
yjcO	0.270973	0.125973
cynX	0.219827	0.126258
ydeH	0.259255	0.126398
mdtD	-0.266361	0.126845
yajB	0.221171	0.126919
ddpA	0.224874	0.12694
pflB	0.466454	0.127351
yehL	-0.28852	0.127351
araH	-0.284364	0.127434
dam	-0.617405	0.127434
ahpF	0.262637	0.127677
yagZ	0.272934	0.128044
yfiB	-0.34869	0.1282
uvrB	-0.343167	0.129774
ydhV	-0.255791	0.129774
yobD	-0.220285	0.129963
lysR	0.221215	0.130189
rihB	-0.342524	0.130189
yfcQ	-0.304817	0.130189
pcnB	0.6701	0.130226
chiA	-0.444761	0.130589
hisJ	-0.330241	0.130784
ydiO	-0.321391	0.131267
chaB	-0.324259	0.131656
malG	0.260487	0.132587
hcaT	-0.283483	0.132816
ndk	0.67607	0.133043
speC	0.281634	0.133155
envR	-0.266611	0.133765
rbfA	-1.29038	0.133765
kefG	-0.371419	0.134083
ydcD	0.265578	0.134083
yhcD	-0.261038	0.134083
yfbG	-0.248557	0.134607
ycfN	-0.336166	0.135417
yicR	0.341764	0.136143
yjcE	0.2308	0.136143
purU	-0.311771	0.136383
yceH	-0.298218	0.136663
fabF	-0.419196	0.1371
yhdN	-0.304303	0.1371
ymcB	-0.383482	0.137224
ydgK	-0.314273	0.137224
yhdA	-0.265589	0.137415
yfiF	-0.309972	0.137557
yajC	0.249376	0.137573
yneF	0.206355	0.138254
deoC	0.298272	0.138258
tatA	-0.273871	0.138777
rpmE	0.61784	0.138877
hslV	-0.274039	0.139924
idi	0.205159	0.140558
flgH	-0.327366	0.14081
ompW	-0.360563	0.140996
sfmF	0.286254	0.141847
yieN	-0.344574	0.141847
yacL	-0.36619	0.142556
ynjE	-0.313071	0.143384
napD	-0.312554	0.143803
yqeB	0.222404	0.143803
pepP	0.309748	0.144025
rbsK	-0.311336	0.144025
sfmH	0.259658	0.14409
yfcG	-0.267186	0.146106
fucA	0.222845	0.146153
yfbK	-0.258412	0.146153
ypeA	-0.239415	0.146153
aidB	-0.307023	0.146542
apt	0.239427	0.146542
yfiD	-0.28038	0.146542
atoA	-0.3003	0.146582
glk	-0.22272	0.146713
sanA	-0.260762	0.146713
ytfL	0.315474	0.146713
fliE	-0.499111	0.149307
ydeI	0.238307	0.149307
entF	0.375688	0.149415
yhhM	0.299859	0.14993
sfcA	0.202224	0.150741
ycdR	-0.309955	0.151072
fepA	0.241895	0.151405
kdgR	-0.211017	0.151405
rumA	0.242513	0.151405
btuR	-0.318875	0.151856
otsA	-0.265584	0.152076
metH	0.469106	0.152536
fdrA	0.275825	0.152696
flgJ	-0.403414	0.152696
ilvL	-0.347003	0.152696
yafN	0.346342	0.152696
yjbM	0.275409	0.152696
hokE	0.232081	0.154019
mdtG	-0.323164	0.154333
ybeH	0.331454	0.154333
ygbT	0.262756	0.154333
yehC	-0.246059	0.154336
yfcH	-0.324659	0.15455
yfcR	-0.314387	0.154582
yceF	-0.564937	0.154682
ycdQ	-0.37023	0.154718
frmA	0.22844	0.155363
motA	-0.292924	0.155446
dcuR	0.237511	0.15695
yfdN	-0.284352	0.157393
ymfL	-0.479104	0.158591
hybA	0.276072	0.159448
ycdS	-0.288908	0.159448
yecR	-0.357216	0.159448
gntK	0.305405	0.159656
menD	-0.285592	0.159752
yaiC	0.234966	0.159752
yicO	0.213376	0.159752
emrE	0.215372	0.160505
ksgA	-1.10545	0.160505
sdaB	0.236064	0.160505
yejA	-0.36295	0.160548
yhfG	-0.355452	0.160755
dgoA	0.400288	0.161726
adhE	0.506428	0.162197
yeaV	-0.204727	0.162552
agaW	-0.330086	0.162729
ansP	0.213115	0.162729
fsr	0.22898	0.162729
ygaW	0.245644	0.162729
yihG	-0.337294	0.162729
ymfJ	-0.343524	0.162729
ssnA	0.242525	0.163225
kduD	0.253216	0.164547
ascF	0.335233	0.165981
katE	-0.289212	0.166684
yfbB	-0.253024	0.166887
phnC	0.234174	0.167328
yiiT	0.294752	0.167328
yecN	-0.186075	0.167487
aegA	0.29016	0.167519
malZ	0.206098	0.167712
ybaJ	0.24802	0.167798
ybaQ	0.21584	0.168312
mepA	-0.263408	0.168501
metA	0.278679	0.168501
poxA	0.45758	0.168501
stfQ	0.274909	0.168501
ydcK	0.241796	0.168501
yjeP	-0.26451	0.169263
ybcY	0.18614	0.169368
rfe	-0.484288	0.169377
thiD	3.60482	0.169753
aat	-0.330673	0.170178
clcB	-0.206811	0.170203
nlpA	0.223678	0.170203
ygfJ	0.212363	0.170203
ygfO	0.218992	0.170203
hipB	0.215574	0.170225
allC	0.236928	0.170466
fruB	-0.246145	0.170466
cysP	0.229504	0.170722
ygcG	0.262217	0.172479
ygbN	0.249779	0.173415
yhdV	-0.282695	0.173585
yafM	0.273792	0.173991
malM	0.238591	0.174254
basR	0.285648	0.174693
ydcX	0.24453	0.175384
yjeN	-0.727386	0.175433
yeaI	-0.272098	0.175453
eutQ	-0.204269	0.175523
ygcO	0.229919	0.175523
brnQ	0.208341	0.175525
iscR	-0.267833	0.175525
mhpD	0.203135	0.175525
yeiL	-0.235653	0.175525
narZ	0.223432	0.175726
gpmA	0.455911	0.176757
hybB	0.272079	0.176757
yieL	-0.288012	0.176757
ccmC	-0.242398	0.177418
ygeN	0.177909	0.178374
malQ	0.356383	0.178763
nhoA	0.228032	0.178763
yohD	-0.214204	0.178763
pldB	-0.377967	0.178781
ycjR	-0.195144	0.178781
rna	0.242796	0.179363
nfrB	0.284799	0.179723
yrhA	0.258037	0.179775
sspA	0.432786	0.17982
yegX	-0.259867	0.180334
pncB	-0.307771	0.180521
cof	0.224148	0.180622
ynjI	-0.291329	0.180622
ypdF	-0.275472	0.181568
hepA	-0.251749	0.181661
malK	0.226356	0.181858
yfiH	-0.297405	0.181858
ydeU	0.210225	0.182619
gadX	0.306623	0.183807
yccS	-0.302884	0.183807
ycfJ	-0.346755	0.183883
yrdB	-0.439698	0.184442
phnB	0.204142	0.185275
gltD	0.22589	0.18601
idnR	0.241469	0.18666
rarD	-0.323908	0.186868
glnH	-0.308017	0.187201
uspG	0.313496	0.187297
ompT	0.322141	0.187334
fhuF	0.280717	0.188366
mhpF	0.215656	0.188933
ccmA	-0.298184	0.188933
eamA	0.206459	0.189872
exo	0.221688	0.189872
yceB	-0.363871	0.189872
ydjN	-0.216429	0.189872
yjcH	0.243477	0.189872
yceO	-0.264894	0.190748
ygfT	0.216506	0.190748
ybiR	-0.249646	0.191422
argO	0.292333	0.19145
kdsD	-0.441056	0.19145
yadI	-0.312573	0.191456
mhpA	0.267197	0.193323
nuoB	-0.226388	0.19406
ydhR	-0.261129	0.194844
cybB	0.269524	0.195073
ygcM	0.22919	0.195295
ypdG	-0.235759	0.196039
ybcM	0.195189	0.196054
yhhK	1.1357	0.196054
pppA	0.211078	0.196159
yfeS	-0.212043	0.196353
caiB	-0.255146	0.19814
ydjX	-0.269751	0.19814
ychE	-0.300955	0.198346
aaeB	-0.272512	0.198377
gnd	-0.38263	0.1995
ydjQ	-0.230435	0.199973
talA	-0.197093	0.200352
yejH	-0.240492	0.200352
ygbE	0.249317	0.200352
yecD	-0.167425	0.200585
ykfI	0.285701	0.200985
ddpB	0.195379	0.201427
eutJ	0.212359	0.201427
uspE	-0.208694	0.201427
yohK	-0.189422	0.201427
yqcC	0.30165	0.201427
hemY	-0.575901	0.201528
yfcN	-0.451577	0.201528
truB	-0.400485	0.202073
yggR	0.396636	0.202636
fliD	-0.303876	0.202859
motB	-0.292283	0.203543
ychH	-0.259209	0.203543
yfcO	-0.266913	0.204471
ompG	0.175837	0.20523
phoA	0.242856	0.205739
flhE	-0.167961	0.205864
paaG	0.185913	0.206479
ydeS	0.208132	0.207762
trpL	0.397414	0.207861
yneE	0.216617	0.209033
ygdE	0.238818	0.209036
yihQ	-0.321875	0.209036
ydiK	-0.22879	0.209722
serB	-1.04854	0.211524
ybdG	0.234553	0.211524
ggt	0.256082	0.212107
yjcP	0.264968	0.212804
glcB	0.261728	0.213113
yggG	0.305956	0.213438
yjbH	0.232202	0.214598
adiY	0.280181	0.215139
yceG	-0.241338	0.215139
ydhU	-0.244023	0.215333
yeiM	-0.204704	0.21549
proX	0.257809	0.215714
fdnH	0.204064	0.21579
fliK	-0.417	0.217343
yheM	-1.52835	0.219618
phoU	1.29092	0.220117
yiaH	0.267068	0.220117
ilvM	-0.334805	0.221939
ygaY	0.210299	0.221939
yhdW	-0.221742	0.221939
yibQ	0.196517	0.221939
ynbC	0.186082	0.22255
yfiC	-0.292105	0.222729
ydeM	0.17923	0.222839
yjfP	0.210715	0.224249
yzfA	0.252803	0.224249
yfdI	-0.327358	0.224261
crl	0.263829	0.224364
hsrA	-0.324346	0.224364
ydeT	0.208382	0.224364
fimB	0.220045	0.225241
tbpA	-0.302846	0.225426
amn	-0.536977	0.225809
yagA	0.333885	0.226088
yedL	-0.255779	0.228232
pioO	-0.372792	0.228433
cmr	-0.213053	0.229876
htpX	-0.160929	0.230115
pstB	0.27575	0.230115
yghQ	0.239357	0.23019
atpF	-0.253465	0.230615
ybdA	0.219548	0.230615
rng	0.499086	0.230791
garL	-0.300475	0.230997
ycjQ	-0.197506	0.230997
htrE	-0.26584	0.231074
ydhK	-0.258189	0.231074
glpD	0.164853	0.231814
fruR	-0.260999	0.232158
ibpB	0.207824	0.234406
hyuA	0.194958	0.23448
yedP	-0.240137	0.234842
yliJ	-0.259802	0.235312
ubiF	-0.853152	0.235472
eaeH	0.220676	0.236595
mglB	-0.187619	0.236878
evgA	-0.212792	0.237236
solA	-0.299888	0.237236
araF	-0.299848	0.237611
ycaL	-0.285763	0.237611
ybdZ	0.188205	0.238624
yfiN	-0.281239	0.239393
dmsB	-0.293649	0.240167
pmrD	-0.251389	0.240431
ycfS	-0.360492	0.240431
yfeU	-0.192533	0.240431
lldP	0.257386	0.240642
yciT	-0.246024	0.240642
narX	-0.267368	0.241792
yqjE	0.302933	0.243232
rluC	-0.633445	0.243655
baeS	-0.212338	0.244449
glpT	-0.210147	0.244638
ptsG	0.384248	0.245238
sbcD	0.161204	0.247456
pncA	-0.225501	0.248445
ytfN	-0.279667	0.248445
rusA	0.214148	0.249835
yhdL	-0.202084	0.249835
kptA	0.254949	0.250699
yeiE	-0.23455	0.250699
yrfA	-0.292165	0.251518
ygaC	0.217207	0.251638
proV	-0.285192	0.252315
yeeO	-0.481994	0.252943
ampG	0.193355	0.253131
hyfG	-0.177225	0.253131
ilvE	-0.278299	0.253131
pepE	0.233809	0.253131
trpD	0.905599	0.253131
trpR	-0.237663	0.253131
ybcC	0.191406	0.253131
yccU	-0.447479	0.253131
ycfM	-0.264516	0.253131
fliZ	-0.27734	0.255028
ydiA	-0.261545	0.255028
ygiF	0.201249	0.255144
dcuD	-0.240332	0.255468
frlB	-0.353935	0.255468
metJ	-1.45374	0.256891
priC	0.192238	0.256891
rpsT	0.584556	0.256891
yfeC	-0.235915	0.256891
pfs	1.26316	0.257049
ynbE	0.185952	0.257094
ybcO	0.232009	0.257225
ydhO	-0.282329	0.257225
yihT	-0.308768	0.257225
yodA	-0.322633	0.25806
gltS	0.172527	0.258272
paaJ	0.160513	0.258272
yhdX	-0.35132	0.258398
ybcV	0.194202	0.258628
rumB	-0.318442	0.258666
yrdA	-0.224813	0.258821
yiiX	-0.243307	0.259285
mtlA	0.200406	0.259438
rbsC	-0.285067	0.259438
umuC	-0.257278	0.259438
ycfH	-0.226304	0.259438
wzzE	-0.234727	0.260714
yeiB	-0.176015	0.260714
yfcL	-0.212729	0.260714
yecF	-0.278017	0.261918
aas	0.217587	0.262003
ycbW	-0.527123	0.262003
yehT	-0.250896	0.262298
malE	0.188257	0.26328
ydiB	-0.216342	0.263324
slyA	-0.216022	0.264668
aaeR	-0.250583	0.264758
ilvD	-0.286058	0.264758
mdlA	0.170304	0.264758
nagE	-0.235219	0.264758
nudH	-0.484028	0.264758
pyrL	0.229791	0.264758
trxB	0.370377	0.264758
dusC	-0.357091	0.264932
feaR	0.189883	0.264932
melR	0.248576	0.264932
yjhT	0.245649	0.264932
rssB	-0.273421	0.265171
purN	-1.77768	0.265736
tolQ	0.348257	0.26595
yhbE	-0.324979	0.266211
yfeD	-0.198626	0.266344
yfbJ	-0.200399	0.266813
polB	-0.252795	0.269377
mtgA	-0.33909	0.269937
ycjX	-0.155941	0.269937
dinJ	0.221555	0.270121
ddg	-0.211622	0.271043
glnG	-0.88481	0.271043
grxB	-0.280716	0.271043
ymcE	-0.332991	0.271043
gatY	-0.153374	0.271333
adiA	0.224896	0.271343
degQ	-0.203724	0.271343
kdsC	-0.336908	0.271343
ydcW	0.233881	0.271343
yecA	-0.224333	0.271343
ade	0.182691	0.271406
araC	-0.24842	0.271406
pal	0.361787	0.271406
phnH	0.182317	0.271406
yhhX	0.2479	0.271406
yqiK	0.220388	0.271472
rpiR	0.211331	0.273105
dsdX	-0.201131	0.274213
ybhO	-0.243789	0.274825
ygeY	0.190704	0.274825
cusA	0.195271	0.275084
ybeL	0.205907	0.275554
ygbM	0.200898	0.276187
yibT	0.269086	0.276187
ygjK	0.205196	0.276219
yciC	-0.310811	0.276288
tyrP	-0.220308	0.276968
hycF	0.232911	0.278893
sgbU	0.200789	0.278893
btuE	-0.250661	0.278932
yfdQ	-0.227303	0.278932
ynjB	-0.219669	0.278932
yohJ	-0.172102	0.278932
yqgB	0.19951	0.278932
aaeX	-0.250405	0.279131
rffA	-0.274157	0.279536
ytfM	-0.660809	0.279969
arcA	-0.971047	0.279976
fliT	-0.238609	0.279976
torS	-0.184305	0.280047
ybjL	-0.272275	0.280047
yheO	-0.345113	0.280047
yqjI	-0.322596	0.280047
essD	0.163973	0.280784
yhaL	-0.264712	0.280784
yjjB	0.257438	0.280784
yafV	0.218593	0.28121
yafT	0.213122	0.281677
ygfU	0.174742	0.282538
ydaE	0.190928	0.283292
nikD	0.29857	0.283344
gph	-0.259518	0.284497
aroD	2.0496	0.284711
yceI	-0.287604	0.285864
yfhH	-0.218534	0.286291
yadM	-0.244501	0.28641
mngR	-0.26375	0.286547
ompN	0.167431	0.286547
pgpB	-0.242794	0.287178
citB	0.246224	0.287344
yadD	-0.250392	0.287347
paaH	0.153419	0.287927
ycdB	-0.186961	0.288429
ycbQ	-0.328502	0.288464
frlR	-0.332406	0.288584
ybgP	-0.27046	0.289111
yfcJ	-0.200023	0.289141
phnO	0.190434	0.289983
hycH	0.303395	0.290038
ycaM	-0.274615	0.290372
yejE	-0.199378	0.290649
fimA	0.207524	0.291157
amiB	-0.244061	0.291719
cobB	-0.271178	0.291719
ybdN	0.165399	0.291719
ygcL	0.217308	0.292752
ygdH	0.183852	0.292752
ypeB	-0.237661	0.292752
fliI	-0.244345	0.293347
fabR	-0.313164	0.293355
ycdO	-0.281357	0.293355
emrK	-0.168631	0.293433
hupA	0.292279	0.294037
fecA	0.172775	0.294117
asnB	-0.227681	0.294382
ygaD	0.204847	0.295955
kbaZ	0.249988	0.295994
prmB	0.425815	0.295994
fdx	0.322077	0.296344
speA	-0.511475	0.296791
frc	-0.161083	0.29716
glnB	-0.212392	0.29716
ybiU	-0.217992	0.29716
galK	-0.247436	0.298091
ybhK	-0.251267	0.298542
yqfE	0.282634	0.298992
phoE	0.211226	0.299345
yqaD	0.177547	0.299351
csgE	-0.303211	0.299393
yhcH	-0.194907	0.300075
cspD	-0.290837	0.300336
bax	0.219691	0.300568
yieM	-0.30623	0.3025
yceD	-0.591597	0.303293
yniB	-0.21834	0.303392
gidB	-0.436576	0.305947
mdtH	-0.285264	0.306673
rnt	0.510907	0.306673
atoE	-0.206064	0.306842
glcF	0.224054	0.306842
yccM	-0.315708	0.306842
ydhW	-0.206383	0.306842
yaiB	0.147518	0.30766
argE	-0.235351	0.307733
emrY	-0.2514	0.308246
caiC	-0.220237	0.309065
rfaY	0.222017	0.309065
yeiW	-0.201428	0.309117
aes	0.20294	0.310738
elaC	-0.214086	0.310764
ilvH	-0.210307	0.310764
yhaK	0.352039	0.310764
dsbC	0.172098	0.310897
tehB	0.188428	0.310897
nrdF	0.198122	0.312607
yjfM	-0.207249	0.313525
yncH	0.209642	0.31385
nirD	-0.222271	0.314317
yfbV	-0.153835	0.314723
sodC	-0.225412	0.315554
yceJ	-0.310519	0.315661
hyaF	-0.228519	0.316011
ybhE	0.301596	0.31611
eutT	-0.161208	0.317386
fkpA	-0.26056	0.317386
yqiA	-0.202311	0.317386
ydfJ	0.185495	0.317788
narW	0.157328	0.318998
astB	-0.199655	0.319566
ylcG	0.156787	0.320902
ompA	-1.05664	0.321002
ydhS	-0.190047	0.321496
yjiE	0.204936	0.322249
setA	-0.206314	0.323187
fhlA	0.235873	0.323855
mcrB	0.218157	0.324514
yaeP	0.179842	0.325468
hscA	0.351062	0.326045
cls	0.193443	0.326723
nanA	-0.17892	0.326796
ynbB	0.2151	0.326796
ybfE	-0.324965	0.327222
ydhL	-0.248588	0.327222
ybdJ	0.149435	0.32726
yidR	0.170624	0.327979
galT	-0.167272	0.328046
ybiX	0.270874	0.329215
yjhV	0.184886	0.329215
avtA	0.158776	0.329549
dinF	0.174502	0.329549
yadN	-0.205141	0.329549
ydaU	0.202986	0.329549
ydcH	0.189546	0.329549
ydjK	-0.187651	0.329549
yfaY	-0.191087	0.329549
yghG	0.192491	0.329549
yqiH	0.173048	0.329549
gabP	0.223101	0.329728
kgtP	-0.24557	0.330934
yqiB	0.176164	0.330934
ybiS	0.189819	0.331082
yciU	-0.242754	0.33203
hypE	0.197694	0.332223
ddpC	0.185937	0.332363
yjhG	0.157624	0.332363
pphB	0.192396	0.332517
mraW	-0.366841	0.333126
yfeA	-0.151847	0.333126
zntA	0.560034	0.33353
pspB	-0.170193	0.333619
ydgI	-0.197904	0.333619
dmsA	-0.185391	0.333935
ada	-0.187878	0.336828
yfdO	-0.205419	0.337075
kil	0.316072	0.337338
yagX	0.181273	0.337338
ygaM	0.173421	0.337699
allA	0.147579	0.337967
ubiC	0.150528	0.337967
ycaJ	-0.177462	0.33838
pyrB	3.40271	0.340161
trpE	3.40271	0.340161
ybbN	0.178876	0.340161
ligT	-0.187035	0.34021
cbrA	0.165574	0.340821
menB	-0.313741	0.340821
ygfF	0.214965	0.340821
yggL	0.234393	0.340821
yneK	0.170339	0.340821
yhaB	-0.209606	0.34189
sgcX	-0.193128	0.342052
ssuE	-0.158359	0.342052
ubiH	-2.18831	0.342052
ybiH	-0.270826	0.342052
ygfH	0.171917	0.342052
yohO	-0.160312	0.342052
yqjD	0.222351	0.342052
yqfB	0.22237	0.342098
agaR	-0.2871	0.342106
ydcI	0.152747	0.342585
gcd	-0.232504	0.343344
rimL	0.165709	0.343344
actP	0.184563	0.343878
nusB	-1.34738	0.34496
ycdY	-0.291484	0.345567
yojI	-0.17089	0.34561
rsuA	0.170957	0.345926
crcA	-0.227558	0.346222
oxc	0.195272	0.346222
yjiD	0.185606	0.346793
metR	-0.284448	0.347272
ydhQ	-0.181087	0.347272
ygiT	-0.213834	0.347272
ccmG	-0.233648	0.347328
csiE	-0.262768	0.347328
rsmC	-0.2843	0.349094
ynaA	0.151551	0.349094
clpB	-0.259253	0.349324
narQ	0.166848	0.351172
ynfK	-0.166023	0.353951
xylE	0.200963	0.354171
yfjZ	0.173728	0.354171
rhaA	-0.298379	0.354709
mdoC	-0.227135	0.355562
ydcJ	0.138108	0.355562
nmpC	0.152343	0.355991
ydbC	0.222684	0.356409
cspE	-0.241904	0.357119
yjcF	0.160785	0.357417
ybfH	0.184608	0.35875
eutH	-0.16458	0.35926
hycI	0.180739	0.35926
ilvB	0.150262	0.35926
miaB	-0.241684	0.35926
mntR	-0.157129	0.35926
rob	0.18784	0.35926
wzxE	-0.269285	0.35926
yeaE	-0.180246	0.35926
ynfL	-0.156956	0.35926
ugpE	0.188235	0.359736
yhcC	0.18666	0.359885
fadL	-0.183592	0.359975
metB	-0.221804	0.360184
rpiB	0.164908	0.361604
ybgI	-0.19176	0.361604
oppF	-0.211427	0.362362
yfbF	-0.165075	0.362362
yrfD	-0.195999	0.362362
menA	0.236788	0.363434
yajI	0.197953	0.363434
yccK	-0.777847	0.363434
zraR	0.199458	0.363434
rfaK	0.144295	0.363462
fis	-0.67959	0.363591
mdtJ	-0.194367	0.363646
ymgD	-0.226143	0.363646
yncD	0.156851	0.363646
sufS	-0.192511	0.363698
metF	-0.246104	0.363801
torA	0.149984	0.363819
ycbV	-0.306	0.364462
soxR	0.159413	0.365267
fixB	-0.202148	0.365662
cysG	0.743914	0.366529
yphD	-0.230127	0.366802
yqiJ	0.168695	0.366802
qor	0.178731	0.367399
acrE	-0.182586	0.367846
lsrC	0.219151	0.367846
hydN	0.200409	0.367932
yafO	0.190054	0.367932
ydiM	-0.202616	0.367932
ycdH	-0.285351	0.368225
lepA	0.562316	0.368865
yphF	-0.212826	0.369249
ycjV	-0.131266	0.369958
hokD	0.168468	0.370428
yfcV	-0.169477	0.370428
yhdU	-0.169703	0.370428
yjiR	0.195857	0.370428
pinH	0.179688	0.370801
recT	-0.198603	0.370801
intS	-0.159322	0.371315
ybgK	-0.19151	0.371315
treR	0.191448	0.371914
ydiZ	-0.223672	0.372943
yfeX	-0.137289	0.372943
dinG	-0.301437	0.373188
yfjD	-0.268452	0.373188
ascB	0.189692	0.373771
pspA	-0.197974	0.373771
recR	0.24734	0.373771
ychA	-0.220436	0.373771
yejK	-0.200077	0.373771
glnE	0.23218	0.374679
yhbT	-0.251926	0.374679
ruvC	-0.195201	0.374902
ygjF	0.176898	0.374902
envY	0.144416	0.375443
ygjG	0.163081	0.375443
yciS	-0.229517	0.37552
yfaA	-0.181374	0.375749
fabH	2.75874	0.376298
ydcV	0.172088	0.376298
rstB	-0.170056	0.376538
ydfP	0.132771	0.376538
ygiL	-0.175567	0.376538
alsB	0.150086	0.377349
yaaW	0.172003	0.377725
ybfO	0.181922	0.378276
gshB	0.140765	0.378287
yeiS	-0.132379	0.378287
lipB	-0.584301	0.378476
yiiD	-0.304197	0.378501
yqaA	0.158085	0.378501
eutI	-0.167969	0.378565
rtn	-0.157873	0.378565
xapA	-0.163638	0.378565
chbG	-0.198065	0.380787
hcp	-0.224933	0.380943
yneJ	0.153649	0.381306
ygeG	0.139259	0.381332
ybhH	0.154208	0.38142
yqiI	0.151846	0.38142
gntX	0.551278	0.381438
ycjP	-0.133824	0.382648
yhhA	0.187476	0.382784
glpB	-0.200579	0.383835
murP	-0.181599	0.383835
ugpA	0.192954	0.383835
aroH	0.376508	0.384907
yfaQ	-0.173681	0.384907
yjgZ	0.157713	0.384907
yejF	-0.168166	0.388303
yaiI	0.161729	0.38991
thiC	2.66882	0.389948
thiE	1.57286	0.390208
yliK	0.192294	0.390208
atoD	-0.179299	0.390936
bcr	-0.17029	0.391773
hflX	-0.239579	0.391773
rph	0.174783	0.391773
ydiF	-0.194024	0.391773
yfaU	-0.200778	0.391773
cirA	-0.165473	0.39282
zwf	0.379669	0.39282
ygaH	0.175638	0.395302
ybhI	0.224855	0.395819
yjhS	0.172935	0.396126
yggD	0.206668	0.39684
gntP	0.213883	0.396842
ecpD	-0.185212	0.397259
ypfI	0.145019	0.397534
ycdU	-0.324938	0.398255
yhjH	0.20981	0.398449
rseB	0.209597	0.399345
yegV	-0.186326	0.399436
pflC	0.205026	0.400565
ydcP	0.319384	0.4018
gcvP	0.376196	0.402232
fadB	-0.202009	0.404013
mtr	-0.290762	0.404013
ybcQ	0.131087	0.404013
yjgM	0.152661	0.404752
napA	-0.171523	0.40565
yifL	-0.279912	0.40565
dps	-0.200072	0.405828
modF	-0.20917	0.406158
yiaT	0.177334	0.406463
[truncated: 1,528 more rows]

## Sheet: rich-5FU - log2 and pval
Gene name	log2FoldChange	FDR adj pval
fis	5.08917	4.30292e-78
atpC	3.78146	2.89035e-65
ptsI	3.63211	7.11678e-60
aceF	3.2727	4.5419e-45
plsB	3.24414	1.24646e-43
deoR	2.89727	5.07774e-39
chpS	3.43563	3.63459e-36
atpB	2.77326	4.94995e-36
yjeF	3.29629	2.05502e-35
rpsT	3.38194	2.7245e-35
ihfB	2.69813	1.50667e-32
ubiF	3.55838	1.3747e-31
lipB	2.55978	4.70022e-31
atpE	2.55817	7.76688e-31
pta	3.03914	4.48661e-30
pitA	2.4826	3.93224e-29
dnaB	2.78762	2.43837e-28
tdk	2.48471	6.05755e-26
atpF	2.33251	7.03998e-26
udp	2.37353	4.6746e-25
deoC	2.22755	2.08726e-23
atpA	2.13671	7.65594e-22
yeiN	2.32363	1.7154e-21
lipA	3.03421	3.96003e-20
yifE	2.28444	3.00002e-18
rffG	1.98079	3.71875e-18
ftsX	1.98222	4.6488e-17
poxA	1.99587	5.80375e-17
yqiC	1.91192	5.91674e-17
ndh	2.31054	1.61309e-15
ybgT	3.95566	5.98671e-15
gmhB	1.84755	8.75301e-15
deoD	1.75428	9.14407e-15
mltC	1.81568	1.12839e-14
fre	1.75854	1.32079e-14
nagD	1.83888	5.90989e-14
sspA	1.74102	6.70711e-14
atpG	1.68943	8.07688e-14
ybeD	3.02581	7.28865e-13
visC	1.92727	9.71148e-13
rph	1.58619	4.16909e-12
ptsP	1.57024	5.96958e-12
ackA	2.33723	5.98466e-12
hdfR	1.66753	8.17194e-12
ubiH	5.98483	2.58615e-11
ftsE	2.12237	5.92175e-11
yeaG	-2.04834	7.08382e-11
arcB	1.67407	1.13476e-10
rplI	2.60141	2.05965e-10
hsrA	1.75307	2.14894e-10
apaH	1.45119	4.63976e-10
recF	1.733	4.77468e-10
recQ	1.66846	6.5996e-10
gpp	1.4049	1.30795e-09
hemG	3.19801	1.3484e-09
ihfA	2.13321	1.4089e-09
sohA	2.24108	1.69119e-09
purA	1.4576	2.29906e-09
corA	1.61358	2.55041e-09
rfaQ	1.38689	4.38753e-09
mutY	1.58761	4.49205e-09
glpK	1.37345	4.90903e-09
tatA	1.33968	9.73442e-09
nlpI	1.79971	1.17757e-08
rpoS	1.9556	1.6073e-08
hepA	1.31271	2.03286e-08
glpF	1.60482	2.06502e-08
rffH	1.35707	2.13318e-08
rffC	1.52332	2.19267e-08
rhoL	1.41396	2.19267e-08
gor	1.55162	3.00913e-08
rnhA	1.46157	3.61158e-08
ulaR	1.50138	3.66328e-08
rluD	1.51545	3.79118e-08
fdhD	1.32381	6.05115e-08
metL	1.28113	6.22533e-08
amiB	1.52407	6.79892e-08
hemY	1.62077	6.9583e-08
pldB	1.46809	7.01654e-08
yiaJ	1.26196	7.43589e-08
rpoZ	1.27831	7.52082e-08
yadR	2.2972	8.13821e-08
cadB	1.4548	8.33763e-08
yjjY	3.28446	8.33763e-08
trkH	1.36381	1.10518e-07
yjeB	2.04091	1.16885e-07
upp	1.36863	1.39498e-07
yiiQ	1.2475	1.51878e-07
yigA	1.42392	1.55842e-07
yihQ	1.43529	1.58339e-07
yiaM	1.2295	1.69661e-07
argC	1.30208	1.85813e-07
yigI	1.38329	2.0817e-07
hemX	1.49582	2.375e-07
yhdE	1.22236	2.375e-07
hslV	1.23095	2.41036e-07
rhtC	1.42465	2.64254e-07
rbsR	1.43376	3.06178e-07
rpiR	1.23719	3.57635e-07
ulaD	1.20179	4.02918e-07
ilvY	1.44404	4.19212e-07
crr	1.18737	4.85916e-07
yihP	1.28398	5.05287e-07
yiaK	1.18345	5.84629e-07
cadA	1.30805	5.99462e-07
yifL	1.40583	8.86019e-07
selA	1.16592	9.04138e-07
yhfX	1.17263	9.04138e-07
malK	1.17894	9.17164e-07
bcsA	1.17128	9.44351e-07
selB	1.15414	1.09434e-06
yobG	1.15382	1.09434e-06
rhlB	1.4955	1.15509e-06
gntY	1.41341	1.27763e-06
rfbX	-1.31737	1.31227e-06
yifB	1.31526	1.33774e-06
yggX	1.30815	1.44301e-06
glpE	1.14713	1.48654e-06
phnD	1.14465	1.48654e-06
tdcB	1.3897	1.58577e-06
yiiX	1.18294	1.65226e-06
ysaB	1.1574	1.66972e-06
yifO	1.29433	1.75541e-06
glgX	1.25396	1.75542e-06
trkA	1.20703	1.82672e-06
pepQ	1.21564	1.8887e-06
yjjG	-1.37468	1.8887e-06
rffA	1.33187	2.00258e-06
frvB	1.29634	2.04406e-06
phnF	1.15996	2.04406e-06
dtd	1.19379	2.12603e-06
avtA	1.12214	2.3793e-06
alsA	1.1325	2.42464e-06
rhaB	1.24163	2.59035e-06
mtlR	1.11407	2.78887e-06
xylA	1.11096	2.82478e-06
fldB	1.11694	2.82571e-06
yihD	1.27977	2.88636e-06
frwB	1.25627	2.97747e-06
phnG	1.12088	3.0639e-06
sthA	1.20178	3.22443e-06
yjeP	1.2475	3.37888e-06
hslU	1.13244	3.70137e-06
yiaN	1.11246	3.79652e-06
racC	2.73107	3.81092e-06
wbbJ	-1.30597	3.81092e-06
mrcA	1.10001	3.83132e-06
yiaL	1.09763	3.88435e-06
mtlA	1.09511	3.89002e-06
yigB	1.28308	3.89002e-06
rbn	1.25067	3.90531e-06
yihO	1.1736	4.06343e-06
proP	1.27758	4.39871e-06
yijF	1.14149	4.49786e-06
ydaT	1.09329	4.51678e-06
fdhE	1.16747	4.87204e-06
aslB	1.27081	4.96235e-06
hflX	1.39828	5.24429e-06
frlR	1.42097	5.26772e-06
kbl	1.09359	5.29587e-06
phnC	1.08199	5.41259e-06
rfaF	1.0901	5.6224e-06
ulaA	1.16787	6.56435e-06
yifK	1.25554	6.56435e-06
yhbG	1.07845	6.59523e-06
lyxK	1.07086	6.60721e-06
yiiD	1.27891	6.80576e-06
arcA	2.32196	7.57745e-06
aslA	1.2997	7.61119e-06
ilvE	1.26588	7.70262e-06
yjfP	1.10057	8.22676e-06
glgB	1.28051	8.34068e-06
yicC	1.06593	9.21847e-06
yhhL	1.06879	9.23932e-06
fadA	1.20557	9.53178e-06
frwC	1.18678	9.60308e-06
dgkA	1.10047	1.05872e-05
frvX	1.20414	1.05872e-05
yjfI	1.19186	1.07846e-05
yefM	-1.23109	1.09812e-05
yraM	1.11375	1.10807e-05
dinD	1.05263	1.12702e-05
yihF	1.20295	1.16241e-05
gidA	3.01242	1.16456e-05
tdh	1.04957	1.25046e-05
dcuR	1.08283	1.31776e-05
serB	1.0547	1.31776e-05
tsgA	1.19662	1.39932e-05
yihR	1.21566	1.41145e-05
yjfY	1.18259	1.42654e-05
npr	1.05331	1.45044e-05
rfaD	1.03958	1.45044e-05
yhfW	1.05944	1.49574e-05
iadA	1.18885	1.61137e-05
metE	1.3922	1.61137e-05
ycgB	1.11278	1.61137e-05
yjdK	1.08492	1.61137e-05
yjeO	1.20879	1.61137e-05
yihV	1.12883	1.74178e-05
melR	1.18651	1.93366e-05
rbsK	1.16531	2.01626e-05
yihL	1.32839	2.02069e-05
argB	1.06415	2.14606e-05
phnI	1.05291	2.14606e-05
yraO	1.20887	2.14606e-05
pflD	1.20023	2.15064e-05
hchA	-1.22426	2.20653e-05
frdA	1.18254	2.21125e-05
alsB	1.01327	2.21396e-05
rfaY	1.01125	2.35388e-05
yiaO	1.01255	2.36254e-05
yjcO	1.02625	2.40758e-05
dcuA	1.14192	2.41565e-05
yjeI	1.29976	2.49745e-05
lldP	1.06983	2.52623e-05
rbsA	1.14893	2.52623e-05
ulaB	1.05596	2.53296e-05
yhhT	1.05619	2.53296e-05
glpG	1.00932	2.66374e-05
ilvM	1.18383	2.66374e-05
yjcQ	1.00642	2.70986e-05
yijP	1.17836	2.78065e-05
ubiB	2.66395	2.78998e-05
gltD	0.999594	2.83682e-05
bcsB	1.03531	2.83967e-05
lldR	0.996515	2.94094e-05
rhaA	1.22649	2.98016e-05
yigZ	1.15352	2.98958e-05
cyaY	1.15736	3.15226e-05
ilvL	1.15472	3.15226e-05
yjcP	1.07407	3.18294e-05
ugpB	0.999596	3.2067e-05
rhaD	1.0877	3.44867e-05
tiaE	0.988272	3.44867e-05
yihU	1.1884	3.44867e-05
yedZ	-1.21378	3.44993e-05
ilvA	1.12629	3.69257e-05
rarD	1.11485	3.754e-05
trmA	1.01914	3.85457e-05
ycdX	-1.21719	3.85904e-05
yhgE	1.20219	3.85904e-05
bglB	1.17209	3.91495e-05
hemN	1.16023	3.91495e-05
phnO	0.992607	3.91495e-05
yiaF	1.02603	3.91495e-05
yhhF	1.07249	4.09525e-05
rpiA	1.39414	4.0965e-05
uxaC	0.983008	4.25621e-05
ilvN	0.982927	4.31388e-05
yjdL	1.07336	4.36259e-05
tdcA	1.12427	4.38364e-05
yigF	1.13369	4.51269e-05
yidF	0.980602	4.56493e-05
yifN	1.12125	4.57249e-05
yihI	1.15981	4.67581e-05
cspA	1.01541	4.67985e-05
xylF	0.975058	4.89124e-05
thiE	1.02638	4.90837e-05
aidB	1.13155	4.91691e-05
yjiA	1.10785	4.91691e-05
xylG	0.96839	4.92035e-05
wbbH	-1.08307	4.93706e-05
yidJ	0.967172	5.01077e-05
yrfD	0.999548	5.01077e-05
pflC	1.09376	5.17217e-05
yjjA	1.1593	5.2945e-05
yeeT	-1.18673	5.30602e-05
thrL	0.97416	5.33013e-05
yihX	1.0954	5.36177e-05
lysS	1.27812	5.40495e-05
rfaK	0.965295	5.5249e-05
yibJ	0.965941	5.58427e-05
asnC	1.11277	5.62812e-05
sra	-1.03308	5.73434e-05
yjjN	1.08465	5.74566e-05
uhpB	0.988506	5.86873e-05
yigL	1.12299	5.86873e-05
yrbF	1.00488	5.90427e-05
atpI	1.24761	5.91934e-05
fsaB	1.09691	5.91934e-05
yegW	-1.20779	5.91934e-05
gadW	0.988777	5.99697e-05
gldA	1.03748	5.99697e-05
yiiS	1.04005	5.99697e-05
malG	0.959851	6.02773e-05
yihS	1.13641	6.08322e-05
rbbA	0.957615	6.18575e-05
yigG	1.12253	6.18575e-05
frvA	1.09388	6.19009e-05
pstS	1.16638	6.35784e-05
yihM	1.05002	6.5372e-05
yhgF	1.11222	6.61737e-05
yihN	1.03685	6.65319e-05
pstB	1.02984	6.98455e-05
clpX	0.952535	7.0282e-05
osmY	1.08585	7.06573e-05
kdgT	1.02067	7.15433e-05
hipA	-1.16071	7.15777e-05
fadB	1.05293	7.24418e-05
yihT	1.10989	7.24418e-05
ivbL	0.949053	7.30511e-05
dacD	-1.11594	7.42017e-05
rsd	0.972929	7.54033e-05
cbl	-1.12655	7.63013e-05
xylE	1.0099	8.10208e-05
rhaT	1.02037	8.11906e-05
yjfK	1.08399	8.11906e-05
yraN	1.08764	8.11906e-05
yihG	1.06617	8.14455e-05
ydcD	-1.13989	8.23004e-05
nlpA	0.937885	8.44713e-05
ytfJ	1.10492	8.67356e-05
yoeB	-1.11684	8.88721e-05
yjeM	1.12335	8.9064e-05
livK	1.0764	8.98101e-05
dppC	0.968629	9.01301e-05
argH	1.07269	9.15787e-05
phnB	0.931996	9.15787e-05
alsC	0.955139	9.45677e-05
yiaB	0.930017	9.6558e-05
yggJ	1.02773	9.6912e-05
yiaY	0.935783	9.6912e-05
nrfD	0.933707	9.7082e-05
dppF	0.969273	9.7471e-05
yeeR	-1.10556	9.7471e-05
yidI	0.929835	9.7471e-05
glnG	1.07695	9.81928e-05
phnE	0.946423	9.84845e-05
ygjK	0.943371	9.92452e-05
panF	0.964648	0.000101846
sgbU	0.931898	0.000101846
yedA	-1.30239	0.000101846
rraA	1.02898	0.000106345
sstT	0.928154	0.000106544
yjeH	1.02194	0.000107654
fimC	1.0064	0.000108161
yhcC	0.967795	0.000108161
dppB	0.937395	0.000109299
xerC	1.38267	0.00010996
yhaI	1.07585	0.000112269
garP	1.05771	0.000115528
yjdJ	1.04029	0.000116007
ilvB	0.9215	0.000117006
yiaA	0.928744	0.000117006
yzcX	1.19432	0.000117006
yeeE	-1.12624	0.000117715
ytfB	1.07613	0.000117715
yjdI	1.05722	0.000118479
sgbH	0.921196	0.000119721
mraW	1.16541	0.000121091
ydcM	-1.06643	0.00012165
kdsC	1.14549	0.000122159
lysU	0.925439	0.000123453
htrC	1.00605	0.000124173
ygjN	0.917492	0.000124173
exuT	0.912845	0.000124931
hofQ	0.950968	0.000124931
sbmC	-1.04274	0.000124931
yjfO	1.04	0.000124931
ligB	0.912421	0.000125279
fdnH	-1.05718	0.000126115
yjfL	0.950812	0.000126878
dcd	-1.07099	0.000126924
dcuB	0.95118	0.000128152
yhcM	0.962603	0.00012903
yidK	0.910539	0.00012903
yiiR	0.938731	0.000132636
yjcH	0.930731	0.000132636
yicI	0.911961	0.000134403
mioC	1.06676	0.000135426
fdoI	1.14992	0.000136013
yoeA	-1.06384	0.000140459
yhjH	1.02173	0.000141556
yhaJ	1.0139	0.000141733
yiaT	0.923604	0.000141733
yeeF	-1.08842	0.00014447
php	0.998628	0.000146183
yjfN	1.01716	0.000146766
metJ	1.25169	0.000147566
yqiB	0.908075	0.000154354
mdtF	0.913103	0.00015444
prlC	0.90787	0.000155102
yjfM	1.02068	0.000156014
phnH	0.90466	0.000159976
sodA	0.996783	0.000163845
yjcD	0.919946	0.000163845
wzzE	0.98298	0.000167287
rhtB	1.05604	0.000167805
yqjC	0.908873	0.000170152
agaD	1.0312	0.000170157
cpxA	1.00655	0.000172946
gntK	1.04383	0.000173405
yjbR	0.904524	0.00017363
idnT	0.973433	0.000173904
yicL	0.893431	0.000173904
yraH	1.03104	0.000175425
cysE	1.31463	0.000180259
uhpT	0.896058	0.000180259
ygfO	0.91181	0.000180429
cutA	1.06642	0.000182315
ulaC	1.03438	0.000182568
yjbF	0.934652	0.000186501
nudC	0.950184	0.000188771
deaD	1.42147	0.000190464
recJ	0.899911	0.000190464
yhiD	0.912252	0.000190624
bax	0.919028	0.000192316
dppD	0.910027	0.000192336
yjdA	1.00826	0.000194306
yhhM	0.946763	0.000194972
fliQ	-1.0996	0.000195253
adiA	1.02727	0.000196131
fxsA	1.02133	0.000196131
nrfE	0.918184	0.000196131
uhpC	0.886086	0.000196131
ulaG	0.903959	0.000196131
yhiP	0.889921	0.000196258
ruvA	-1.03925	0.000203361
yieI	1.05102	0.000203869
ydcE	-1.06791	0.000204776
yeeS	-1.01098	0.000205632
frwD	0.922008	0.000209829
yibG	0.883979	0.00021098
tag	0.88934	0.0002122
yjfC	0.924822	0.000212699
nikB	0.90021	0.00021305
fimA	0.944821	0.000214255
agaB	1.01867	0.000216229
cpxP	0.999021	0.00021741
gltF	0.882252	0.00021741
thiG	0.981361	0.000218933
sbp	0.961106	0.000218983
yhcO	0.885698	0.000220148
malM	0.892887	0.000220441
yjjK	1.01705	0.000220595
flgN	-1.08306	0.00022072
deoA	1.0493	0.000221524
pldA	1.01363	0.000221524
yjiX	1.02043	0.000221569
yoeF	-1.15348	0.00022172
fdoG	1.00619	0.000221919
cpdA	0.97216	0.000222286
narY	-0.988429	0.000225629
yjcZ	1.01688	0.000228867
rhaR	0.973872	0.000228916
cdh	0.983311	0.000229309
rfaI	0.883775	0.000229309
glgA	0.975705	0.000230576
yjaB	0.915966	0.000232739
yraJ	1.01984	0.000233652
ibpA	0.875934	0.000234357
yijE	0.940383	0.000241794
yhiR	0.891927	0.000242202
yicE	0.872723	0.000243361
yidH	0.87017	0.000243968
speB	1.09258	0.000245589
yjhI	0.877156	0.000251664
yedO	-1.13012	0.000252857
yibH	0.868887	0.000254303
ytfA	1.01094	0.000254303
gss	0.902387	0.000254671
yhaC	1.01449	0.000254671
yicO	0.86943	0.000254671
ygjH	0.88284	0.000255193
nanE	0.895771	0.000256144
ulaF	0.882967	0.000256969
yhjY	0.867343	0.000257727
malS	0.865515	0.000263304
cbrA	0.865323	0.000264084
emrD	0.868378	0.000264084
rfaJ	0.866575	0.000264084
zur	0.893795	0.000268294
arsR	0.869875	0.000269052
talB	0.865412	0.000269161
yodD	-1.13989	0.000269161
yhjA	0.921872	0.000275369
caiT	1.00083	0.000275596
dinF	0.870086	0.000279172
yhdT	0.919102	0.000279172
hisH	-1.01402	0.00028029
mdoD	-1.03347	0.00028029
yhdA	0.867959	0.00028029
yjaG	0.988187	0.000282092
mutM	0.862525	0.000283035
trkD	1.006	0.000283037
yjeJ	1.01584	0.000287593
tig	-0.981203	0.000288259
hisD	-1.02211	0.000289198
yqiG	0.874122	0.000294925
yjcR	0.913393	0.000295267
yodB	-1.00166	0.000296169
yraP	0.986128	0.000296945
dcuD	0.87232	0.000300173
yhbW	1.00284	0.000301642
yidQ	0.859857	0.000301642
hrpA	-1.00971	0.000302515
yodA	-1.33415	0.000312656
hisA	-0.954944	0.00031562
actP	0.864362	0.000315772
mtgA	0.985639	0.000315772
thiM	-1.0954	0.000315772
thiS	0.885969	0.000315772
yrbB	0.901629	0.000315772
sfsB	1.00737	0.000318137
cpdB	0.923326	0.000319848
rpiB	0.859848	0.000320403
yoeE	-1.01106	0.000320775
adhP	-0.961362	0.000320926
nikE	0.936032	0.000322231
yqjA	0.852272	0.000322277
yddW	-0.946479	0.000326312
yidE	0.856712	0.000326312
sgcC	0.862918	0.00032967
nac	-1.03556	0.000330131
aldB	0.849437	0.000336585
glpX	0.905905	0.000336585
hflC	1.06758	0.000336585
ygjG	0.862691	0.000339143
nudF	0.85063	0.000348506
pepA	0.868217	0.000349712
yicR	0.866562	0.000352285
exuR	0.880768	0.000352736
pck	0.866429	0.000352736
yiaG	0.848702	0.000353852
ulaE	0.931532	0.000355919
dsrB	-1.08163	0.000356381
pyrC	-0.989664	0.000356381
nhoA	-0.997879	0.000360454
ppc	0.943239	0.000361953
cadC	0.961804	0.000365385
ygjP	0.84248	0.000368533
yraK	0.946361	0.000368533
ilvD	0.983925	0.000373473
glf	-1.06508	0.000374998
yrfB	0.924358	0.000374998
yeeA	-0.925087	0.00037888
cobU	-0.992621	0.000380059
ygfS	0.839999	0.000383743
sgcX	0.877432	0.000387231
yjeT	0.928801	0.000387231
yghK	0.850709	0.000389372
xylB	0.843706	0.000389561
yhiL	0.838276	0.000394666
ygjQ	0.8456	0.000395232
prkB	0.923907	0.000402098
yicN	0.840181	0.000402098
asnA	0.932611	0.00040893
yicS	0.837996	0.000409685
sgcE	0.836303	0.000411468
flgG	-1.02832	0.000414555
rhsE	-0.961232	0.000425214
yggT	0.94607	0.000429912
ade	0.833422	0.000437156
yieM	1.01975	0.000437156
feoB	0.983595	0.000437976
degQ	0.836243	0.000439543
envR	0.831979	0.000443382
kefG	0.987134	0.000443382
rfe	1.01633	0.000443382
xylR	0.831274	0.000443382
yegE	-0.952688	0.0004469
yhdV	0.852217	0.0004469
argE	0.926818	0.000449247
glvC	0.831584	0.000450962
ytfN	0.947944	0.00045434
gph	0.828757	0.000458551
malE	0.829229	0.000460374
yrbE	0.861727	0.000461173
yjbC	0.901356	0.000463474
ptsA	0.967304	0.000463552
creB	0.894664	0.000467458
recG	0.827666	0.000467458
yrfF	0.861467	0.000467458
yddJ	-0.941035	0.000469463
thiC	0.960204	0.000469479
dgoK	1.02008	0.000473931
glcC	0.868697	0.000491663
ytfF	0.937383	0.000491663
yjjP	0.91358	0.000493003
qor	0.84324	0.000496262
yhjV	0.842816	0.000496262
bcsF	0.833695	0.000497977
fdnG	-0.935525	0.000502368
xdhD	0.827214	0.000508101
adiC	0.929964	0.000508119
agaS	0.97142	0.000508119
yjbJ	0.83055	0.000508119
iclR	0.967521	0.000514043
aaeX	0.879993	0.000515481
hslO	0.845811	0.000515481
bglF	0.958034	0.000515817
yieF	0.820535	0.000515904
yjjB	0.947826	0.000517798
ytfQ	1.13692	0.000528637
ygjO	0.84439	0.000532909
yeaH	0.886422	0.000553281
aceA	0.915591	0.000555757
yjcE	0.819264	0.00055593
setC	0.818226	0.00055615
yhhH	0.833443	0.0005573
ydeK	-0.969382	0.000559883
yhdH	0.815409	0.000560243
basR	0.920651	0.000561261
gcvT	1.09027	0.000561261
menA	0.920931	0.000561261
ygjM	0.822611	0.000561261
yjbI	0.837121	0.000561261
yedD	-1.15001	0.000567595
sufI	0.830804	0.000568489
galE	-1.04985	0.000569497
yjhG	0.814575	0.000569497
yneE	-0.964106	0.000569497
mrr	0.92731	0.000571689
nagA	0.948192	0.000573271
metF	1.28382	0.000577424
dedA	-1.03495	0.00057888
sfcA	-0.858699	0.000579744
xylH	0.827241	0.000591272
yhaO	0.955337	0.000592083
mscL	0.826395	0.000592636
nanR	0.816956	0.000592636
pitB	0.826697	0.000592636
glvB	0.812262	0.000604102
guaD	0.810769	0.000606767
yibK	0.812861	0.000613246
gltP	0.815418	0.000613583
yieL	0.92355	0.000630652
pepE	0.85656	0.000646622
yhbU	0.991492	0.000655787
mdtE	0.835614	0.00065945
yidG	0.807093	0.0006611
glnL	0.940377	0.000661473
yjgL	0.857523	0.000663986
acrE	0.823247	0.000675002
nrfC	0.807715	0.000675002
ompL	0.838179	0.000675002
yhcG	0.832104	0.000675002
mtlD	0.807292	0.000677301
rhaS	0.883652	0.000686951
ygeW	0.831875	0.000686951
thiH	0.906173	0.000691637
endA	0.841974	0.000694701
fecA	0.801101	0.000694701
rbsD	0.914974	0.000695935
yibQ	0.803141	0.000697561
yhgG	0.950272	0.00069818
fabR	0.931733	0.00069992
ansB	0.847816	0.000705461
znuB	-0.84345	0.000710486
yhjX	0.814378	0.000714462
malP	0.93794	0.00071936
yhcD	0.800672	0.000723038
uxaA	0.796863	0.000742322
nrfF	0.814067	0.000742949
ytfL	0.992961	0.000742949
yeeU	-0.927728	0.000746117
yjjW	0.906383	0.000753184
yjjM	0.918265	0.000753665
ydcJ	-0.854036	0.000774979
ddpC	-0.964502	0.000777733
gadX	0.893547	0.000782809
yhaB	0.905521	0.000786041
melA	0.92519	0.000789183
yjfJ	0.876521	0.000789183
minD	-1.08093	0.00079015
yncD	-0.928221	0.000805787
phnN	0.918037	0.000806483
yidL	0.798585	0.000806483
yodC	-1.00511	0.000811335
yoaH	-0.80564	0.00081287
chpB	0.948056	0.000818064
kil	1.48892	0.000818064
cspG	-0.886723	0.000827619
nikC	0.829332	0.000827619
yjiP	0.906528	0.000833814
yecM	-0.793965	0.000834525
bcsE	0.881332	0.000838659
wbbK	-0.918216	0.000842748
soxS	0.788296	0.000849706
yebS	-0.793673	0.000854074
ugpC	0.874746	0.000857168
truB	0.990648	0.000861512
yjgF	0.849351	0.000873657
yhiN	0.786916	0.000875407
yegH	-0.944652	0.000886072
bcsZ	0.861476	0.000886569
yjiN	0.85857	0.000887141
yedM	-0.940511	0.000888178
intQ	-0.827421	0.000901906
yecN	-0.812612	0.000916574
yhbQ	0.927979	0.00091693
ydcK	-0.937144	0.000924099
sbcB	-0.876973	0.000926781
sgcB	0.789634	0.000929586
yiiG	0.880256	0.0009394
pabA	0.87488	0.000944194
yibA	0.780933	0.000944194
yrbD	0.834782	0.000944194
ttdB	0.792712	0.000946567
aaeA	0.810296	0.000956662
soxR	0.782328	0.000967138
def	0.782062	0.000967867
yhaV	0.909774	0.000967867
yneG	-0.896783	0.000967867
yqjF	0.901196	0.000967867
glvG	0.782273	0.000969658
hokA	0.78003	0.000969658
yigE	1.12874	0.000969658
yidR	0.780385	0.000973439
ygiE	0.801648	0.000988067
rimJ	-1.03712	0.000988145
sgbE	0.777625	0.000988777
yiaU	0.779377	0.000988777
slp	0.783919	0.00099068
yncG	-0.976478	0.00099107
feoA	0.89642	0.000996776
rbsC	0.894095	0.000996776
yhfG	0.903547	0.00100348
smg	0.775983	0.00101538
yjcF	0.775812	0.00101697
exoX	-0.842421	0.00101824
yegJ	-0.883109	0.00103146
adiY	0.911457	0.00103217
ygfH	0.826544	0.00103507
yedF	-0.92565	0.00104091
ibpB	0.774647	0.00104415
yheS	0.921272	0.00104415
ydeM	-0.826527	0.00105275
yidP	0.773927	0.00105438
ebgC	0.775731	0.00105826
ydeJ	-0.808064	0.00106071
yedI	-0.951898	0.0010691
yedW	-0.938733	0.0010691
yhhZ	0.842292	0.0010691
yicH	0.777625	0.0010691
yncA	-0.904549	0.0010691
fliM	-1.20451	0.00107232
yedV	-0.908757	0.00107415
yhhJ	0.774397	0.00107807
yhdW	0.775946	0.0010782
ynbE	-0.880066	0.00110288
ydcO	-0.90838	0.00110457
osmC	-0.908904	0.00110478
cycA	0.85615	0.00111789
minC	-1.10343	0.00111789
ydcU	-0.942305	0.00111789
ydeW	-0.895975	0.00111789
paaH	-0.845683	0.00112386
yhiK	0.800251	0.00112386
yjcB	0.90091	0.00112525
yneH	-0.913006	0.00113345
yhcF	0.767155	0.00113648
glcB	0.880045	0.00114287
uvrA	0.79855	0.00114293
aaeB	0.802403	0.00114726
cobT	-0.902979	0.00114845
yjiL	0.878768	0.00115371
gcvH	1.07978	0.0011554
nrfA	0.837448	0.00116658
btuB	0.811878	0.00119399
glcF	0.885711	0.00120231
treB	0.792568	0.00120403
yeeN	-0.887452	0.00120403
yhdN	0.773435	0.00120403
yddH	-0.895386	0.00120515
cld	-0.894096	0.00121302
erfK	-0.897545	0.00121809
ygiQ	0.781571	0.00122764
yeeZ	-0.900352	0.00123009
yhdY	0.781393	0.00123009
wcaL	-0.861268	0.00123035
ygiL	0.794581	0.00123084
yiaV	0.76161	0.00123724
cspC	-0.777669	0.00123783
manA	-0.826207	0.00123783
ydeO	-0.83464	0.00123807
ygjV	0.775021	0.00123807
bipA	1.25057	0.00123907
yjiS	0.836231	0.00123998
yedL	-0.955587	0.00124872
flhA	-0.767619	0.00125141
fpr	0.818424	0.00125778
gspH	1.02069	0.00127269
alx	0.763193	0.00127436
ubiC	0.761997	0.00127436
ydfC	-0.842527	0.00127436
yhjE	0.802348	0.00127457
yieP	1.01209	0.00127457
ymbA	-0.891821	0.00127749
yhhN	0.802611	0.00127854
hisC	-0.900653	0.00128172
eptB	0.779019	0.00128526
pyrL	0.849642	0.00130686
ydeT	-0.895708	0.00131274
argG	0.873572	0.0013281
wcaE	-0.855078	0.00133763
zraP	0.793056	0.0013452
yddG	-0.864918	0.00135237
clpP	0.862977	0.00135523
livJ	0.876695	0.00135761
torZ	-0.758266	0.00135761
yneK	-0.880425	0.00135761
hybG	0.898677	0.00137064
cutC	-0.768891	0.00137528
yicG	0.752992	0.00139398
yjbB	0.788602	0.00139398
yjiE	0.815085	0.00139398
marR	-0.835614	0.00139583
yeeY	-0.91575	0.00140061
yhaH	0.830446	0.00140061
ygjR	0.753732	0.00140989
yjgD	0.785246	0.00140992
gshA	0.859429	0.00142609
bcsC	0.768735	0.00143586
tyrB	0.752305	0.00143591
yjhD	0.755627	0.00143712
fkpB	0.751902	0.00144664
metB	0.867139	0.0014817
yjbE	0.863554	0.0014893
ebgR	0.762239	0.00149307
yrdA	0.757321	0.0014937
yecT	-0.780277	0.00149918
fhuF	0.849996	0.00153441
zupT	0.763721	0.00156013
yqjK	0.839959	0.00156283
ytfG	0.800794	0.00156283
metC	1.01106	0.00159071
araH	-0.923533	0.00159122
yhdL	0.743513	0.00160396
alsE	0.745157	0.00162408
flhE	-0.753022	0.00162532
ydbC	-1.05242	0.00165362
pqqL	-0.871512	0.00165485
ggt	0.809244	0.00165585
yggH	0.89849	0.00165987
aer	0.745208	0.00166571
hisL	-0.925783	0.00166883
yqjG	0.836078	0.00166883
fecR	0.751323	0.00167574
rfaG	0.750167	0.00167837
ygiN	0.814195	0.00167837
ycbF	-1.28345	0.00168253
yibD	0.742458	0.00168253
tam	-0.801558	0.00168774
ydcY	-0.858273	0.00168774
yhjB	0.76557	0.00168774
yqhC	0.794904	0.0017026
creC	0.784774	0.00170294
cmtA	0.861722	0.00170351
ddpD	-0.883809	0.00171369
yaaY	1.3725	0.00171369
ycdR	-0.874856	0.00171369
ddpF	-0.84625	0.0017326
gadC	-0.792225	0.00174981
yhjR	0.744579	0.00174981
yeeW	-0.828675	0.00175545
ynbC	-0.823583	0.00175669
glcE	0.802634	0.00176661
yncN	-0.893107	0.00178282
speA	0.873124	0.0017872
narV	-0.833424	0.00178832
rfaC	0.74289	0.00178855
treF	0.776683	0.00178855
yjeS	0.809545	0.00180722
ugd	-1.13002	0.00180843
cpxR	0.785478	0.00181274
hslR	0.831284	0.00182347
arsC	0.78949	0.00184791
dicB	-0.874133	0.00184791
dppA	0.753326	0.00184791
hisB	-0.877487	0.00184791
ubiD	0.738247	0.00184791
wbbI	-0.845835	0.00184791
ygfM	0.732535	0.00184791
yiiM	0.819798	0.00184791
yiiT	0.780152	0.00184791
thrA	0.786938	0.00186714
yjcC	0.731687	0.001871
tdcF	0.850855	0.00187493
basS	0.87068	0.00189122
guaB	0.886806	0.00190717
hybC	0.765808	0.00190761
gatY	-0.740987	0.00190962
ytjB	0.784138	0.00191807
xerD	2.38653	0.00192846
yggL	0.879085	0.00192968
yjdF	0.863556	0.00194252
ydhQ	-0.880595	0.00195064
yhiJ	0.751264	0.00195064
yjbL	0.733581	0.00195064
ubiX	3.54103	0.00197182
yiaH	0.770791	0.00202207
yedK	-0.856404	0.00202942
mcrC	0.795571	0.00205568
hisF	-0.848418	0.00208036
livF	0.752333	0.00208439
dam	1.10588	0.00209085
livH	0.803445	0.00209089
yjgR	0.73257	0.00209293
lldD	0.726621	0.00209879
yddK	-0.816943	0.00209879
yghA	0.83099	0.00209879
yhhY	0.751934	0.00209879
torY	-0.737624	0.00210458
bioH	0.86198	0.00210619
cobS	-0.86768	0.00210619
fliS	-1.03311	0.00210619
tatB	1.39083	0.00213099
ytfT	0.816823	0.0021428
yqgA	0.819486	0.00214495
yhdU	0.724993	0.00214867
yhfS	0.850871	0.00214867
hdhA	-0.891582	0.00215151
yegV	-1.11773	0.00216127
dgoT	0.722827	0.00216344
gltS	0.72461	0.00216344
yqiI	0.723906	0.00216344
nirD	0.77784	0.00217204
yjjZ	0.790945	0.0021802
ruvB	-0.87359	0.00218983
yjiR	0.792431	0.00218983
yqjI	0.820029	0.00218983
fumB	0.815607	0.00219198
malX	-1.0984	0.00219904
ycjX	-0.751404	0.00219904
cpsB	-0.825763	0.0022093
hdeB	0.749125	0.00221792
ygiZ	0.750891	0.00221792
ydcW	-0.905142	0.00221974
nrfG	0.718243	0.00223294
yneL	-0.830742	0.00225741
glcG	0.801487	0.0022614
yncC	-0.83355	0.00227331
caiB	0.766514	0.0022745
yhbO	0.855274	0.0022745
yqjE	0.846343	0.00228121
fieF	0.805665	0.00230529
yjhX	0.746301	0.00231935
ydfJ	-0.847115	0.0023249
thrB	0.779877	0.00233346
tynA	-0.740305	0.00233777
hsdS	0.822506	0.00234456
ygiF	0.745718	0.00234456
yiaW	0.725725	0.00234456
yieN	0.821437	0.00234456
yncH	-0.879122	0.00234456
mcrB	0.797136	0.00234902
ygiC	0.779287	0.00235982
yqiJ	0.731365	0.00235982
yhfK	0.919975	0.00237202
yjjQ	0.811598	0.00240747
cspF	-0.819618	0.0024098
paaI	-0.811887	0.00241649
yobB	-0.720837	0.0024197
pykA	-0.719526	0.00242381
ugpQ	0.720165	0.00246062
ycfQ	-0.990599	0.00247716
fliT	-0.961003	0.00247991
yiiL	0.986418	0.00248961
yhcN	0.74759	0.00250663
mdoH	-0.963619	0.00251941
gspA	0.794421	0.00252167
ugpA	0.806075	0.00252653
eda	-0.802613	0.00255032
yneI	-0.846564	0.00257932
yraI	0.815862	0.00258472
rtcR	0.839558	0.00260039
ddpX	-0.914114	0.00260945
thrC	0.720844	0.00260945
slyD	0.831788	0.00262375
yebV	-0.716404	0.00262663
yhdJ	0.707328	0.00262663
yliK	0.844626	0.00263462
ynfK	-0.82693	0.00263462
ygiT	0.80398	0.00263985
uhpA	0.706791	0.00265463
creD	0.791529	0.00267611
yjaA	0.984503	0.00267611
yhiQ	0.784994	0.00267696
kbaZ	0.823517	0.00268782
trmH	0.705135	0.00269457
ugpE	0.751934	0.00270075
ygiW	0.763658	0.00270463
yeeJ	-0.850456	0.00272405
yjiY	0.762345	0.0027285
metA	0.788705	0.0027909
ydaM	-0.761756	0.00282064
rob	0.771716	0.00282093
yohK	-0.808219	0.00284342
serA	0.810592	0.0028463
cspI	-0.814644	0.00285341
mdtI	-0.917275	0.0028658
rfaE	0.706878	0.00287085
yeaK	-0.844508	0.00287488
rluA	0.742428	0.00288402
yeeV	-0.842279	0.00288788
rffT	0.8271	0.00293453
yhgN	0.802559	0.0029403
yedJ	-0.834472	0.00296749
sdiA	-0.907063	0.00298444
yidX	0.808384	0.00298781
kbaY	0.812547	0.00299827
ydcR	-0.888441	0.00299827
smf	0.69944	0.00300217
ydbL	-0.7296	0.00301233
ydcS	-0.818403	0.00303527
cybB	-0.852631	0.00305316
yijD	0.75259	0.00306889
cbpM	-0.896392	0.0030773
feaR	-0.808747	0.0030773
rtcA	0.791612	0.0030773
mog	0.79529	0.00309726
yohJ	-0.812708	0.00309726
mviM	-0.807373	0.00310183
kdgK	0.722413	0.0031205
yqhA	0.738131	0.0031205
yqhG	0.73418	0.0031269
ydbH	-0.720093	0.00316089
ydeV	-0.768982	0.00317413
ygjE	0.704562	0.00319513
yebU	-0.715754	0.00319555
yggF	0.783293	0.00319555
yjgZ	0.707442	0.00319555
vsr	-0.789305	0.00322576
yqiA	0.755212	0.00323537
ytfR	0.799992	0.00324711
yhfY	0.783126	0.00325549
yhjG	0.705428	0.00326328
yfdG	-0.821273	0.00328667
msrA	0.819674	0.00329593
pyrF	-0.741512	0.00330272
ytfP	0.732796	0.00330951
mdoB	0.78599	0.00331575
caiA	0.777683	0.00334762
gcvA	0.790845	0.00334762
ydhK	-0.883746	0.00334762
hybF	0.731988	0.00338555
yjbA	0.703585	0.00342336
grxC	0.749697	0.00344592
uspA	0.687421	0.00348605
yjiZ	0.759853	0.00348605
fimI	0.739545	0.00349515
yhfU	0.789503	0.00351416
yeaE	-0.819482	0.00354316
trpR	0.779333	0.00363481
yeaN	-0.738495	0.00364341
ymgG	-0.861793	0.00365651
malT	0.764642	0.00367371
thiF	0.789542	0.00369618
ydaY	-0.774585	0.00370282
fimG	0.756003	0.00373087
rem	-0.786384	0.00373087
purT	-0.706916	0.00376845
yjbH	0.720034	0.00376845
ddpB	-0.75887	0.00377637
paaJ	-0.776034	0.00377637
wcaD	-0.683932	0.00377637
chbG	-0.917057	0.00379524
yhaM	0.769674	0.0038446
yddL	-0.783163	0.00387228
hisI	-0.815023	0.00387774
yjgJ	0.740174	0.00387955
yjbG	0.694518	0.00390248
hybE	0.727954	0.003906
ynfD	-0.717085	0.00391958
hyaF	-0.862359	0.00392614
ydfQ	-0.789482	0.00395986
ymcD	-0.872907	0.00398645
ygdB	0.68567	0.0039887
glgS	0.720912	0.00399667
pabB	-0.682809	0.00401032
araF	-1.03622	0.00403559
rcsA	-0.839682	0.00405778
gadE	0.755589	0.00407636
yjgI	0.796091	0.00407636
yqjB	0.713903	0.00407636
ytfI	0.809755	0.00407636
hokB	-0.796425	0.00408739
yncM	-0.759941	0.00412654
slt	0.757188	0.00412715
dcrB	0.693953	0.00415982
yjgX	0.723028	0.00418304
yegU	-0.890075	0.00418392
yggP	0.788107	0.00418917
tsr	0.768873	0.00423691
yjfZ	0.738353	0.00426202
ygjF	0.690099	0.00426582
ydhL	-1.0166	0.00431637
nudD	-0.694276	0.00431974
tehA	-0.810988	0.00432516
aroA	-0.773803	0.00434429
iaaA	-0.810204	0.00436871
nanA	0.675451	0.00436984
cheY	-0.731124	0.00438329
ydfR	-0.717668	0.00438398
nirB	0.809675	0.0044034
yhjJ	0.703844	0.0044034
rfbD	-0.807628	0.00443135
yedR	-0.813447	0.00444865
ydeE	-0.774896	0.00445296
yggW	0.813013	0.0045086
dctA	0.925418	0.00453261
feaB	-0.710427	0.00453261
glnE	0.704075	0.00453261
osmE	-0.846725	0.00453261
rimI	-0.939123	0.00453261
yqiK	0.733611	0.00453261
intB	0.769689	0.0045789
rimL	-0.782571	0.00458279
ydaN	-0.700643	0.00461174
mtr	0.784053	0.00463473
ydfB	-0.832096	0.00464618
yidB	0.775138	0.00468179
yebN	-0.684861	0.00468212
yncJ	-0.791596	0.00468288
ypeC	-0.684974	0.00473031
mraZ	0.715055	0.00477626
ydcA	-0.786426	0.00482245
yrdB	0.784593	0.00482584
edd	-0.744813	0.00483985
galF	-0.766326	0.00483985
glnD	0.749907	0.00483985
yhhK	0.697106	0.00483985
yniD	-1.00829	0.00483985
yoaB	-0.678488	0.00483985
yiiU	0.78555	0.00484627
yedQ	-0.841656	0.00487529
wcaJ	-0.780926	0.00487618
yjiD	0.70319	0.00488163
mdtD	-0.76662	0.00489612
nikR	0.713778	0.00489612
trmE	2.79806	0.00490212
yhfT	0.762017	0.00490212
hdeD	0.697648	0.00501411
cysJ	0.759332	0.00503199
yaaA	0.704928	0.00503199
ygjJ	0.691725	0.00503199
mdaB	0.685848	0.00503982
yecE	-0.66265	0.00505546
yhbS	0.819388	0.00505681
yraQ	0.925013	0.00508344
yjhT	0.737065	0.00509406
rfaL	0.65759	0.00515091
nrfB	0.687947	0.00515349
trg	-0.803415	0.00525415
aceB	0.743002	0.00525448
yghG	0.735701	0.00526079
ttdA	0.711741	0.00526211
ycjS	-0.766794	0.00526899
gshB	0.758528	0.00528152
yeeI	-0.72986	0.00534024
yrfG	0.686577	0.005343
tdcR	0.725532	0.00537175
dos	-0.703896	0.0053792
yghU	0.725094	0.00542258
yjfF	0.749677	0.00542258
ymcC	-0.989431	0.00542262
ydhA	-0.91242	0.00547909
ydaQ	-0.748767	0.00548387
ygfJ	0.656476	0.00548387
bcsG	0.668285	0.00550488
ydaO	-0.696512	0.00551625
hflK	0.760684	0.00554176
pal	-0.959311	0.00554191
flhB	-0.657831	0.00554564
yraR	0.758476	0.00554564
nikD	0.759566	0.00555119
yhbX	0.751466	0.00556052
yjhC	0.658449	0.00556052
ydiH	-0.761523	0.00560824
ygdL	0.664853	0.00565304
ydhS	-0.774015	0.00570553
yeaD	-0.768856	0.00578219
dinI	-0.838793	0.00579235
exbB	0.726911	0.00579673
argO	0.781265	0.00580793
creA	0.716064	0.00584667
hybO	0.760281	0.00585011
yghR	0.69055	0.00585011
yddE	-0.748621	0.0058758
flgH	-0.8007	0.00588606
yiiF	1.18962	0.00588606
glpD	0.655219	0.0059038
nhaR	0.727712	0.00591853
ydbK	-0.717835	0.00596614
yggD	0.773783	0.0059798
agaV	0.734725	0.00599177
yhcH	0.647685	0.00599177
yjaH	0.764468	0.00599177
yqiH	0.651212	0.00599495
glnQ	-0.754167	0.00600824
tldD	0.675267	0.00600824
dsbC	0.651151	0.00603495
rpmB	2.19653	0.00611365
wcaI	-0.724408	0.0061687
yhgA	0.826665	0.0061687
ftn	-0.767777	0.00621579
mobB	0.718512	0.00624744
ynfO	-0.699868	0.00624744
yqgE	0.766961	0.00624744
yeeP	-0.773275	0.00625123
yhbT	0.760669	0.00626353
tdcG	0.728553	0.00627197
rbsB	0.753524	0.00627294
ygiU	0.642366	0.00628907
frlD	0.728172	0.00631221
idnR	0.692397	0.00635539
bacA	0.653307	0.00639016
dipZ	1.00506	0.00642833
marC	-0.754865	0.00642833
fliY	-0.907703	0.00651478
ydcT	-0.759385	0.00651478
yebB	-0.647895	0.00653122
yliG	-0.804594	0.00660087
yedX	-0.768758	0.00662597
yegD	-0.693761	0.00663113
yebC	-0.640938	0.00664747
ybeX	1.08618	0.00666635
gntU	0.737216	0.00667274
surA	0.642367	0.00670237
ynjI	-0.82263	0.00670237
ycjO	-0.725079	0.00674238
cspB	-0.745338	0.00674908
ydcC	-0.768647	0.00677722
yghS	0.647329	0.00677722
yoaD	-0.673831	0.00686765
fruR	0.748021	0.00687417
purD	0.663406	0.00688966
yjhP	0.648011	0.00689531
yoaC	-0.644733	0.00690092
rstB	-0.758604	0.00696925
ydeH	-0.742037	0.00700021
leuA	0.690367	0.00701641
clcB	-0.69684	0.00701903
gatD	-0.698655	0.00703778
ynaI	-0.730939	0.00713939
aceK	0.705149	0.00719655
csiE	-0.991345	0.00721253
glcD	0.711431	0.00721494
ydeU	-0.719806	0.00722359
ogrK	-0.676103	0.00732287
relE	-0.695947	0.00732287
ydeS	-0.736123	0.00732287
yegT	-0.707649	0.007355
agaA	0.733162	0.00738675
zraS	0.681244	0.00740517
ydeI	-0.729736	0.00743252
ygiP	0.696667	0.00744227
eptA	0.72405	0.00747608
alr	0.709709	0.00755871
nadR	0.910041	0.00759087
yjjI	0.696718	0.00759087
yeaU	-0.659159	0.00759767
yebW	-0.651723	0.00759862
sgcR	0.657602	0.00760576
phnK	0.648536	0.00760595
gntT	0.74153	0.00761604
yrhA	0.682839	0.00763542
acs	0.645582	0.00767343
rluB	-0.886719	0.00768404
yjgB	0.64034	0.00768404
wzc	-0.721459	0.00768589
yobH	-0.702813	0.00773558
ldhA	-0.737703	0.00776347
radA	0.625555	0.00778142
yjjJ	0.71199	0.00788503
ymfB	-0.743115	0.00795243
yzgL	0.744022	0.00803247
dgoR	0.767095	0.00807154
gspE	0.802277	0.00809368
qseB	0.703829	0.00812469
ynfM	-0.715309	0.00812469
fimE	0.649003	0.00813926
pphA	-0.629964	0.00813926
ygeO	0.621535	0.00813926
yqjD	0.720847	0.00815643
polA	0.710333	0.00816025
ydfD	-0.652817	0.00816074
ynfP	-0.714016	0.00823431
ssnA	0.654257	0.00829706
garR	0.724116	0.00832029
otsA	-0.740201	0.00833478
yjbD	0.654213	0.00833478
tdcC	0.705782	0.00836457
yjiO	0.718357	0.00838132
glnH	-0.781152	0.00846417
secB	0.650519	0.00849653
melB	0.709781	0.00851877
pncB	-0.783492	0.00851877
yegL	-0.696375	0.00852834
yieG	0.761935	0.00852834
ynbD	-0.729824	0.00854088
slyA	-0.740252	0.008631
wcaC	-0.719972	0.00863966
prmA	0.626268	0.00869269
flgL	-0.754475	0.00872273
yjiG	0.709406	0.00873972
ydgR	-0.761991	0.00879357
ytfE	0.733205	0.00884135
yqgC	0.721081	0.00892824
gmd	-0.773421	0.00893889
rihB	0.775703	0.00911677
yecA	-0.788459	0.00912461
yghQ	0.676623	0.00912461
bdm	-0.688191	0.00915107
ycfM	-0.701088	0.00923309
yaaJ	0.6288	0.00923547
flu	-0.730463	0.00925445
ycfL	-0.664111	0.00927044
mdtC	-0.680286	0.00927136
glmM	1.87528	0.00932404
hokC	0.67385	0.00932404
ydeA	-0.7493	0.00932404
yrbC	0.693317	0.00932404
yghZ	0.647665	0.00936255
yhhP	1.96411	0.00936255
ynaK	-0.707424	0.00945709
ynfN	-0.671508	0.00945853
yrbG	0.727201	0.00947811
ygeK	0.609246	0.00951165
ydcN	-0.754225	0.0096357
ysdC	0.696544	0.00968587
yedY	-0.755296	0.00991076
yggV	0.708823	0.00991076
frlC	0.683131	0.00995168
treR	0.671255	0.00997018
azoR	-0.695096	0.00999617
hipB	-0.691252	0.0100545
yqeH	0.605693	0.0101165
cmtB	1.01053	0.0101306
hsdR	0.686192	0.0102318
yegK	-0.785745	0.0102803
fadD	-0.70832	0.010282
yqeB	0.603346	0.0103429
rfaB	0.669614	0.0103863
ydhR	-0.74137	0.0103928
acrF	0.614905	0.0104164
ybbS	-0.607113	0.0104401
yjhV	0.619746	0.010443
katE	-0.7662	0.0105261
rsmB	0.690419	0.0105306
lplA	0.697885	0.0106082
yggE	0.683787	0.0106082
fkpA	0.705388	0.0106944
yrfA	0.718047	0.0106944
ydjA	-0.737123	0.0107827
nikA	0.615211	0.0108148
kptA	0.671784	0.0109803
yeaJ	-0.726365	0.0110038
fecB	0.603822	0.0110151
tehB	-0.718366	0.0110151
yeaT	-0.616519	0.0110151
yhfA	0.686625	0.0110476
yjiT	0.677637	0.0110499
ybhR	-0.690692	0.0111614
yhdX	0.699149	0.0111842
yecG	-0.861514	0.0112989
yghD	0.659438	0.0114005
ydfE	-0.687769	0.0114174
alkA	-0.695788	0.011479
ogt	-0.681318	0.0115566
hybD	0.675962	0.0116076
wcaK	-0.739987	0.0116665
yajC	-0.663081	0.0116665
asmA	-0.735204	0.0117401
gatZ	-0.642757	0.0117555
motB	-0.901295	0.0117951
idnK	0.654729	0.0117964
fliL	-0.86353	0.0117985
yebO	-0.662287	0.0118244
yhhX	0.679194	0.0118244
yghT	0.609433	0.0118296
yqfB	0.70518	0.0119063
hybB	0.685119	0.0120463
yebY	-0.629141	0.012121
yegI	-0.697793	0.0122351
yrhB	0.666489	0.0122351
carA	0.680334	0.0122516
dgsA	-0.768716	0.0123209
fliG	-0.733327	0.0123209
hflD	-0.682644	0.0123209
ycdC	-0.713096	0.0123209
hsdM	0.787305	0.0123654
yjbO	0.702238	0.0123654
caiC	0.641068	0.0123903
tolQ	-0.700547	0.0124028
yjbQ	0.621547	0.0125632
yjjV	0.663369	0.0125632
ydcF	-0.693056	0.0126032
yeaY	-0.591997	0.0126032
yohH	-0.677628	0.0126341
cbrC	0.708201	0.0126763
cheZ	-0.599639	0.0126763
hslJ	-0.602956	0.0127461
ynbB	-0.752854	0.0128518
uspF	-0.676787	0.0128882
ygeI	0.585274	0.0129682
garD	0.661722	0.0130341
cheR	-0.587825	0.0131291
pdxY	-0.795785	0.0131814
fliH	-0.818864	0.0131862
tolA	-0.760136	0.0132406
yccZ	-0.828827	0.0132479
htgA	0.604225	0.0132836
yeaX	-0.603939	0.0134736
hdeA	0.60826	0.0134976
helD	-0.603908	0.0134976
ychQ	-0.695769	0.0134976
yjbM	0.623908	0.0134976
yjiQ	0.621363	0.0135656
fsaA	-0.699915	0.0135656
uxuR	0.788613	0.0136191
zraR	0.595893	0.0136191
paaG	-0.642888	0.0136534
arpA	0.602711	0.0136538
ompG	-0.597324	0.0136579
baeR	-0.666154	0.01366
fic	0.844404	0.01366
ydeN	-0.663375	0.0137974
fliA	-0.912532	0.0139144
cheB	-0.624859	0.0139737
phnL	0.621612	0.0141129
ygeL	0.578409	0.0141358
zapA	0.634779	0.0141358
yoaG	-0.579627	0.014242
ycgI	-0.721909	0.0142938
ydjG	-0.698667	0.0142938
yegR	-0.610989	0.0142938
yhjD	0.610771	0.0144448
yeeX	-1.22675	0.0145267
metR	0.890472	0.014671
dcp	-0.706315	0.0147028
galT	-0.662585	0.0147028
garK	0.729662	0.0147028
yiaC	0.599452	0.0147028
ydfX	-0.651082	0.0147072
yddB	-0.663929	0.0147717
yecO	-0.594569	0.0147717
ptsN	0.576217	0.0148005
rpoD	1.18918	0.0148005
ydcZ	-0.68032	0.0148005
yebT	-0.610504	0.0148005
wzxE	0.878321	0.0148646
yaaH	0.601685	0.0148646
yqhD	0.634968	0.0149583
mdtA	-0.639282	0.014989
yneJ	-0.653043	0.014992
ydaS	-0.649284	0.0149926
arsB	0.627926	0.0150888
nupC	-0.634467	0.0151264
rspA	-0.63036	0.0151264
fecI	0.605749	0.0151377
ygfU	0.577648	0.0151397
gnd	-1.33338	0.0151534
pyrD	-0.742331	0.0151534
galM	-1.08224	0.0156076
ydfT	-0.63811	0.0156076
aspA	0.671774	0.0156692
livG	0.601791	0.0156913
ansP	-0.632087	0.0157848
ymfA	-0.670735	0.0157848
hcaR	0.663675	0.0158743
gntX	0.741963	0.0158793
abgT	-0.621833	0.0161071
paaX	-0.647334	0.016166
ppdB	0.645287	0.016166
ydiF	-0.773573	0.016166
narW	-0.617454	0.0163495
tyrP	-0.704605	0.0163589
ygcL	0.634496	0.01636
yecF	-0.77333	0.0164041
ydfI	-0.663963	0.0164111
mdtK	-0.807539	0.0165136
ydfP	-0.617596	0.016516
wzxC	-0.682133	0.0165743
glgC	0.665937	0.0166175
ygiV	0.59943	0.0166369
yjeN	1.12572	0.0167587
lsrD	-0.668138	0.0168052
gspG	0.825074	0.0168359
acpT	0.602302	0.0168774
fliZ	-0.749156	0.0169782
agaW	0.639256	0.0172287
yhbE	0.68155	0.0172307
yghF	0.640685	0.0172835
ppiA	0.99446	0.0175517
astB	-0.684346	0.0176091
fliP	-0.792023	0.0176195
exbD	0.614033	0.0176549
fixB	0.626076	0.0176836
aaeR	0.596702	0.0176935
mdtG	-0.684104	0.0176935
spy	-0.662147	0.0177247
dicC	-0.642873	0.0177381
ydeR	-0.660377	0.0177381
pbpG	-0.665834	0.0177401
trkG	-0.718616	0.0177918
astA	-0.663356	0.0178339
sgcQ	0.570431	0.0178419
yhjC	0.608015	0.0179049
yeiT	-0.746464	0.0179332
ydbD	-0.670404	0.0180343
uxuA	0.643214	0.0181172
yaaU	0.632638	0.0182162
znuA	-0.696608	0.0182387
lsrF	-0.643996	0.018322
yheU	0.673582	0.0184055
ybhS	-0.661979	0.0184664
yobA	-0.604769	0.0185603
ycgG	-0.628021	0.0186089
nirC	1.32381	0.0186139
fliR	-0.704882	0.0186425
fumC	-0.700913	0.0186517
mdtH	-0.832841	0.0186747
holE	-0.574623	0.0187224
asr	-0.675864	0.0187879
yceH	-0.66608	0.0187879
shiA	-0.649704	0.0188363
ybhC	-0.822504	0.0188533
mdoG	-0.732683	0.0188741
yjgN	0.555579	0.0189474
yebQ	-0.575074	0.0189808
kefB	0.669106	0.0190351
yjhQ	0.588257	0.0190351
speG	-0.607009	0.0190761
pmbA	0.60616	0.0190995
hyfI	-0.711855	0.0191407
nrdG	0.632097	0.0191594
yebE	-0.573551	0.0193607
eamA	-0.634964	0.0193695
pspF	-0.577526	0.0195338
bglA	0.670103	0.0196096
flgF	-0.817648	0.0196325
ycaO	-0.688124	0.0196325
fbaB	-0.589427	0.0197927
pppA	0.575547	0.019799
fdx	0.664973	0.0198698
zntR	0.771057	0.0199331
yqfE	0.683698	0.0199845
spr	-1.00146	0.0201869
yrfC	0.647085	0.0202373
yjiM	0.651514	0.0203137
yhjK	0.610391	0.0205146
yqgB	0.598744	0.0205283
ybjS	-0.660646	0.0205797
ybhD	-0.645293	0.0208062
idnO	0.633817	0.0208235
paaK	-0.653341	0.0208826
ygeN	0.549076	0.0208826
yniA	-0.712041	0.0208957
ygeG	0.544541	0.0209916
ynjC	-0.643077	0.0209916
cytR	0.613309	0.021029
stfQ	-0.66446	0.021029
yeaB	-0.568032	0.021029
yecP	-0.553549	0.021029
hcaT	-0.632601	0.021063
minE	-0.831059	0.021063
mdtJ	-0.7343	0.0210753
ycjQ	-0.619508	0.0211408
fcl	0.600843	0.0211691
yieK	0.619967	0.0211691
fimF	0.591512	0.0213732
yggC	0.627248	0.0214354
yjgA	0.701215	0.0214846
ddpA	-0.597333	0.0215203
yfjG	0.99253	0.0215503
rtcB	0.629671	0.0217083
ruvC	-0.648045	0.0217225
kefF	0.623346	0.0217943
yceJ	-0.797295	0.0217943
uvrY	-0.728521	0.0218941
yeaR	-0.568852	0.0219531
pspD	-0.571124	0.0220732
ybiJ	-0.631887	0.0220732
ycjG	-0.548787	0.0220732
fdnI	-0.682834	0.0220743
rfaS	0.539233	0.0221698
ynaJ	-0.600616	0.0221774
ynfB	-0.626299	0.0223705
hybA	0.598215	0.0224421
ygfT	0.547547	0.0225767
gatC	-0.642571	0.0227713
dmsD	-0.612131	0.0228751
bioA	-0.745397	0.0228808
yedE	-0.713465	0.0228808
pyrB	0.601076	0.0229369
usg	-0.640744	0.0231367
yjhR	0.568547	0.0231367
yjhS	0.576842	0.0231367
cedA	-0.694202	0.0232845
mntR	-0.588564	0.0234362
rfaH	0.546209	0.0234446
rmuC	0.647582	0.0234446
yneF	-0.586388	0.0234446
yegP	-0.595288	0.0234966
yncI	-0.611792	0.0235875
astD	-0.67906	0.0237407
rfaZ	0.595015	0.0237407
ydcX	-0.639456	0.0238638
sdaA	-0.551493	0.0239077
solA	-0.690522	0.0239204
yceF	-1.12945	0.0239204
proQ	0.54275	0.0239401
fecE	0.547682	0.0239459
ydiL	-0.70741	0.0240882
aphA	0.607928	0.0241503
pbl	0.53218	0.0241816
sprT	0.614516	0.0242356
yeaM	-0.533497	0.0242356
ynbA	-0.67097	0.0243236
frlA	0.638274	0.0244017
pinQ	-0.610707	0.0246154
ygfG	0.636661	0.0247001
caiF	0.535988	0.0247119
ycjY	-0.634854	0.0247539
ycdT	-0.75919	0.0247588
ydhB	-0.670425	0.024839
yibT	0.583493	0.0248715
slyX	0.731825	0.0248941
yjgH	0.586384	0.0250388
rlmB	0.617011	0.0251093
ygfX	0.597821	0.0253258
ycgJ	-0.606569	0.0254075
fecC	0.633734	0.0255825
yghW	0.599942	0.0256747
yeaL	-0.646247	0.0257772
blr	-0.742951	0.0258454
yqeF	0.525774	0.0259103
ebgA	0.590004	0.0259892
flgJ	-0.772854	0.0260154
yecD	-0.527053	0.0260284
yjiJ	0.600925	0.0260784
emtA	-0.630832	0.0261766
cysG	0.707214	0.0263141
ydiA	-0.692531	0.0263342
yieH	0.639006	0.0264556
yhhA	0.584114	0.0265113
yjjU	0.60212	0.0266558
yqfA	0.623906	0.0266745
idi	0.523675	0.0266891
malQ	0.644259	0.026719
yqeK	0.529248	0.0267755
ygeQ	0.523153	0.0267946
fimH	0.577087	0.0268713
yciS	0.554085	0.0269642
fliF	-0.670721	0.0270063
ydcH	-0.633161	0.0270088
torS	-0.560996	0.0270106
yjgM	0.532156	0.0271485
ynaA	-0.586286	0.0272489
rarA	-0.663342	0.0274069
phnJ	0.605659	0.0274464
ycbG	-0.941399	0.0274464
ycdB	-0.585947	0.0274625
gidB	0.86978	0.0274691
ynjH	-0.627322	0.0279797
potA	-0.643465	0.0280128
manX	-0.597189	0.028175
pepP	0.63656	0.0283193
treA	-0.618547	0.0286188
rihC	0.556109	0.0290698
yfbS	-0.658555	0.0297022
amyA	-0.677287	0.0298556
yhaL	0.617531	0.0298774
phoH	-0.625504	0.0302721
artJ	-0.620166	0.0304419
yqeA	0.511149	0.0306428
mgsA	-0.636524	0.0306759
ycdM	-0.580354	0.0307092
ytfH	0.599431	0.0307322
cybC	0.57205	0.0309133
dgoD	0.62154	0.0309539
yecC	-0.702689	0.0309539
motA	-0.634899	0.031027
torA	-0.544	0.0311222
rfbB	-0.600217	0.0311453
paaF	-0.548651	0.0313284
caiD	0.541573	0.0313329
fruK	0.879223	0.0316716
garL	0.611044	0.0316716
yohL	-0.641306	0.0316716
damX	0.56018	0.0316935
cspH	-0.531804	0.0317258
nth	-0.657711	0.0318677
ydjJ	-0.627653	0.0320099
yeaO	-0.524719	0.0320099
agp	-0.718798	0.0320666
yjiK	0.579747	0.0321839
pepT	-0.626897	0.0323966
pspE	-0.542317	0.0323966
tolR	-0.62133	0.0324143
rsmC	0.620034	0.0325446
ygeP	0.505954	0.0325732
yeeD	-0.59673	0.0325802
cusC	-0.525692	0.0326136
ygeY	0.507488	0.0326533
flxA	-0.564376	0.0326755
ydgC	-0.654292	0.0327155
fhuE	-0.643867	0.0333613
ybjN	-0.61052	0.0334387
flgI	-0.636074	0.0334514
ydhC	-0.636559	0.0335208
kduI	0.502109	0.0337356
yeaW	-0.518179	0.0337872
puuE	-0.559264	0.0338161
yhbH	0.538463	0.0339065
polB	0.564933	0.0339475
lsrG	-0.569593	0.0339981
yedP	-0.597188	0.0340502
ygeD	0.503002	0.034094
yjhA	0.574649	0.034251
yccS	-0.608755	0.0343173
nagB	-0.586555	0.0344942
csgF	-0.602302	0.0344973
yegQ	-0.544554	0.0344973
chaB	-0.61234	0.0345137
ydfH	-0.582959	0.0346156
paaY	-0.641584	0.0348329
mpaA	-0.520949	0.0349283
purF	-0.630656	0.035159
wcaF	-0.541991	0.035238
nfi	0.574584	0.0352925
yidA	0.996455	0.0352925
yceA	-0.666151	0.0353737
pabC	-0.595936	0.0353835
ygfQ	0.4976	0.0353835
potD	-0.581161	0.0355708
yeeO	-0.979327	0.035612
yfcF	-0.613611	0.0361077
agaR	0.617617	0.0362553
yjgW	0.529298	0.0366448
cbpA	-0.740297	0.0367381
fliN	-0.646361	0.0367914
ydjR	-0.587954	0.0369378
yhbP	0.617416	0.0370075
ybbA	-0.495881	0.0370626
yeaI	-0.60981	0.0372208
yhiF	0.506325	0.03723
dgoA	0.626137	0.0374883
yzfA	0.555816	0.0376834
ycdS	-0.568787	0.0377039
ydhD	-0.83026	0.0377039
araG	-0.648427	0.0377058
ycdL	-0.728375	0.0377058
yegZ	-0.561234	0.0377058
yjiH	0.538595	0.0380024
ydcI	-0.544139	0.0380109
yccU	-0.955106	0.038095
ycdQ	-0.653118	0.0382993
ssuD	-0.570429	0.0383842
ybhO	-0.606325	0.0384985
yniC	-0.601696	0.0384985
dcm	-0.569296	0.0388219
aas	0.512789	0.0389721
yeaC	-0.551498	0.0390321
ydhV	-0.577013	0.0391113
yohO	-0.566817	0.0396103
ybhG	-0.650955	0.0396115
ycjR	-0.51755	0.0396115
argP	0.555286	0.0396782
ycjF	-0.534992	0.0399138
ycfX	-0.622057	0.039977
ynaE	-0.546513	0.0401594
ybfE	0.635533	0.0402848
yccF	-0.7805	0.0404684
wcaA	-0.560493	0.0404973
gapA	-0.568827	0.0406485
ynfH	-0.563751	0.040662
ygeM	0.48574	0.0407245
ycjN	-0.541678	0.0409202
yibN	0.535536	0.0410464
yfiP	-0.624925	0.0410511
htpX	-0.487242	0.041281
sufB	-0.582317	0.0413407
yjhH	0.545971	0.0414526
epd	0.580033	0.0415878
yhhW	0.544144	0.0415878
btuE	-0.697913	0.0416297
sseB	-0.646836	0.0418669
yghO	0.565667	0.0420411
astE	-0.582831	0.0421276
modF	-0.633482	0.0423588
pdxK	0.493463	0.0423588
yghY	0.519825	0.0424312
cmk	3.03134	0.0425085
yheT	0.703788	0.0425267
agaI	0.614448	0.0425602
yobF	-0.489895	0.0427323
uspE	-0.544137	0.0432507
ycaR	-0.626547	0.0436283
galU	-0.554643	0.043751
ydiJ	-0.581642	0.0438878
uxaB	-0.561912	0.044011
yheM	2.46597	0.044011
yhbC	2.34584	0.0440857
ydgT	-0.68293	0.0446051
prmB	-0.607025	0.0448898
ydhW	-0.575067	0.0450423
ygeR	0.477503	0.045173
yecR	-0.656382	0.0451823
sieB	-0.547879	0.0452856
ppdA	0.508892	0.0453675
ygdK	0.51083	0.0453675
pnp	0.680468	0.0456846
ydfG	-0.554606	0.0459315
ybjO	-0.576956	0.0459655
ygcJ	0.513396	0.0461287
xdhA	0.482332	0.0461597
pncA	-0.572863	0.046203
ybgL	-0.51733	0.046203
ampE	0.572808	0.0465933
ybjL	-0.568327	0.0467666
apaG	0.471904	0.0469881
ycgK	-0.541353	0.0471365
pioO	0.643189	0.0472558
secG	0.600749	0.047285
sfmH	-0.53692	0.0473273
yhaK	0.634547	0.0473273
yggM	0.620004	0.0474283
fadH	0.541933	0.0474928
ydeQ	-0.548991	0.0474937
ymjC	-0.523606	0.048305
wrbA	-0.637023	0.0488072
xdhC	0.477415	0.0488072
nlpD	0.522001	0.0489681
sufD	-0.558205	0.0489681
ychH	-0.554793	0.0489681
ydhI	-0.56609	0.0489681
fixA	0.502769	0.0492491
pyrI	0.544068	0.0493594
fliO	-0.595131	0.0494758
yeaP	-0.478809	0.0499048
yciF	-0.533542	0.050185
ydjM	-0.589014	0.0503795
manY	-0.524908	0.0504672
tatE	-0.553279	0.0507982
ydhP	-0.604277	0.0507982
rffD	0.536883	0.0508176
appC	-0.776588	0.0510577
kdgR	-0.512418	0.0512657
yecJ	-0.596388	0.0520656
pntB	-0.58269	0.052122
yhbY	0.628282	0.0525644
yoaA	-0.474976	0.0525772
gntP	0.535488	0.0528104
paaE	-0.545245	0.0528104
pfkB	-0.602624	0.0528104
add	-0.833784	0.0528156
sapA	-0.502983	0.0529184
cyaA	0.562593	0.0530403
pspA	-0.491511	0.0530629
ygeX	0.477907	0.053148
aroB	0.531411	0.0531852
yjjX	0.546368	0.0533773
ydeP	-0.539083	0.053525
flgK	-0.622914	0.0536411
mdoC	-0.559135	0.0537205
exo	0.478084	0.0539101
rumB	-0.571314	0.0539101
purH	0.525276	0.054204
ybiS	-0.525812	0.0544164
ybjX	-0.548443	0.0544857
yfgD	-0.642249	0.0548044
fklB	0.645768	0.0549908
yoaI	-0.539092	0.0549908
ybjD	-0.572043	0.0551334
ychM	-0.524734	0.055134
gcvP	0.63674	0.0551378
yeaS	-0.476634	0.0551378
hscA	0.541208	0.0552902
yehK	-0.524122	0.0562381
ssuC	-0.585708	0.0562891
csdA	0.490176	0.0563693
xapA	-0.506363	0.0563693
yqjH	0.575155	0.0564491
nmpC	-0.463804	0.0566976
recT	0.486959	0.057209
ynjA	-0.550348	0.0572976
ynfA	-0.494339	0.057353
mpl	0.513275	0.0574294
ccmC	-0.550332	0.0574562
fixX	0.50741	0.0574806
cysB	-0.521458	0.0575331
rfbA	-0.628443	0.0575331
rpmE	0.547583	0.0576528
ybiP	-0.524516	0.0578391
oppF	-0.521771	0.0579665
xdhB	0.451449	0.0581027
ymgF	-0.512751	0.0581047
wzb	-0.514259	0.0581141
stfR	-0.486635	0.0581408
rstA	-0.56697	0.0581471
mipA	-0.595201	0.0582154
yheL	1.7013	0.0582448
fecD	0.451937	0.0582969
purU	-0.522178	0.0584912
ydbJ	-0.548136	0.0584912
yaaW	0.473582	0.0586613
hscC	-0.549379	0.05895
wcaB	-0.522059	0.0590142
uidC	-0.536462	0.0590277
yebR	-0.866063	0.0590277
tus	-0.544101	0.0595289
nudG	-0.551638	0.0598649
paaC	-0.500988	0.0600695
yeaA	-0.735052	0.0601677
yoaF	-0.463525	0.0601677
yojI	-0.543461	0.0601677
metH	0.571218	0.060296
relA	0.538279	0.0605533
greB	0.635477	0.0605639
fepG	-0.484099	0.0605892
yliI	-0.565469	0.0606265
yccA	-0.799784	0.0608138
yebG	-0.487966	0.0608138
ycbL	-0.621279	0.0609965
ybhE	-0.738639	0.0611003
mglC	-0.525209	0.0612821
ycgR	-0.522649	0.0618602
ptr	0.445587	0.0621621
trmC	-0.616066	0.0621621
ycfN	-0.579072	0.0621621
yaaI	0.497589	0.0623129
ycbJ	0.686117	0.0629022
csgE	-0.634081	0.0629829
nuoG	-0.53441	0.0637202
btuD	-0.612235	0.0639004
proV	-0.589601	0.0639004
yjhB	0.463092	0.0640638
sufC	-0.551672	0.0644437
fimB	0.460647	0.0646613
ycaQ	-0.748961	0.0646613
yfcN	-0.848273	0.0646613
puuR	-0.473757	0.0649192
nfsA	-0.554204	0.0650284
ybiI	-0.443724	0.0651869
ynfF	-0.486119	0.0651869
ydjE	-0.647485	0.0651873
lysR	0.438751	0.0655621
ynjD	-0.559874	0.0659824
ybiX	-0.561679	0.0663783
ydiY	-0.656564	0.0664622
ydjO	-0.586396	0.0668489
yfiD	-0.493115	0.0668562
ydfZ	-0.504569	0.0672142
cyoA	0.436118	0.0672773
sodB	-0.633863	0.0673298
yecI	-0.537136	0.0673298
ynfE	-0.540546	0.0673298
potC	-0.51143	0.0674618
ybeL	-0.501739	0.0675366
yqcA	0.46439	0.0679433
yfjN	-0.542013	0.068173
yfeO	-0.442365	0.0683675
folM	-0.558951	0.0688217
rpsO	2.11518	0.0698379
nanT	0.492878	0.0702059
yceK	-0.546623	0.0704698
ychP	-0.494401	0.0704928
ybiN	-0.527144	0.0705333
ybdR	-0.522186	0.0709918
kdsD	0.56745	0.0711384
ybaY	-0.438007	0.0717196
araE	0.428734	0.0724366
etp	-0.903564	0.0725787
uspG	-0.53459	0.0725787
ygeV	0.428568	0.0726079
ydgA	-0.529593	0.0727899
gspD	0.707618	0.0728487
cysQ	0.57149	0.0728897
galS	-0.489277	0.0729912
yadB	0.526288	0.073025
torR	-0.494206	0.0732041
manZ	-0.446943	0.073305
cspD	-0.570798	0.0733467
dadA	-0.506778	0.0733467
yeaQ	-0.438762	0.0733999
ung	-0.61495	0.0734366
mngR	-0.57776	0.0735542
djlA	0.427522	0.07372
yfbO	-0.509589	0.07372
abgR	-0.481617	0.0740025
fixC	0.601249	0.0740025
ydcV	-0.506412	0.0740025
yejF	-0.525498	0.0740025
ptsG	-0.498282	0.0745942
aroL	-0.4316	0.0752081
yehM	-0.507742	0.0752081
ydiN	-0.512326	0.0755133
ydhO	-0.648453	0.0758269
ycfZ	-0.505287	0.0758317
sgrR	0.454139	0.0760712
pheA	-0.593235	0.0762595
clpA	-0.504237	0.0763701
ymfI	-0.496192	0.0763701
yohG	-0.499273	0.0764313
yfcZ	-0.501434	0.0765186
gudD	0.435494	0.0778621
[truncated: 1,544 more rows]

## Sheet: rich-FUDR - log2 and pval
Gene name	log2FoldChange	FDR adj pval
fis	6.88429	1.45834e-145
tdk	5.66511	4.72484e-133
aceF	3.59365	4.938e-55
chpS	3.93454	1.5198e-45
deoR	3.11705	2.9366e-45
lipB	3.00486	2.51289e-43
poxA	2.92057	4.19454e-39
yjjG	-3.92646	1.56922e-36
proQ	2.70456	6.8602e-34
ptsI	2.70525	1.82536e-33
ubiF	3.60118	4.29556e-33
ndh	3.28571	1.05519e-32
ptsP	2.50885	1.69016e-30
rffG	2.49868	2.80384e-29
nupC	2.38705	1.13217e-27
ybgT	4.65711	1.78161e-26
yqiC	2.33995	1.12215e-25
nlpI	2.77826	1.61689e-24
ihfB	2.44114	1.64538e-24
atpB	2.19163	3.55463e-23
udk	2.17626	2.05374e-22
rplI	3.22851	3.96727e-21
sspA	2.04767	8.84805e-20
ybeD	3.37308	2.33241e-19
yobG	1.95525	8.10482e-19
pta	2.44328	8.45368e-19
dcd	-2.31836	6.21927e-18
atpE	2.00604	7.43769e-18
fre	1.93879	1.02751e-17
atpF	1.81751	4.82396e-16
ubiD	1.79951	5.69703e-16
ihfA	2.4579	5.68466e-15
hsrA	2.11068	5.79849e-15
yjjY	3.91508	6.51161e-15
arcA	3.12259	7.75714e-15
racC	3.45525	2.94555e-14
yifE	2.02019	7.26681e-14
visC	2.00041	1.31497e-13
trmU	2.75662	1.5521e-13
ackA	2.35526	5.45796e-13
yfjG	2.28573	5.45796e-13
rfbD	-2.02687	7.79345e-13
deaD	2.16283	2.7573e-12
tig	-1.86417	8.4889e-12
rimI	-2.35205	1.07749e-11
purR	1.55265	1.37869e-11
rpiA	1.96177	2.33494e-11
rbsR	1.79808	4.59933e-11
gmhB	1.69641	5.85429e-11
fadR	-1.7888	6.09035e-11
yfgL	1.74219	8.97088e-11
cpxA	1.61723	2.35676e-10
rfbX	-1.72333	3.47022e-10
rpsT	1.97542	5.70688e-10
deoC	1.53745	1.30177e-09
guaA	2.78525	3.45242e-09
atpC	1.37617	3.69036e-09
recF	1.62144	7.38315e-09
plsB	1.61196	7.46505e-09
pitA	1.34644	7.98127e-09
gpp	1.33459	1.12716e-08
ilvE	1.5354	3.11066e-08
tolR	-1.62764	4.28221e-08
fabF	1.39237	4.9517e-08
ybfF	-1.51318	6.55311e-08
rfaQ	1.31504	6.77059e-08
dam	1.69969	6.91757e-08
hemG	2.89839	1.02226e-07
tatA	1.24535	1.87002e-07
asmA	-1.53678	2.53419e-07
hipA	-1.44944	3.6115e-07
ybcN	-1.31494	6.04267e-07
tolQ	-1.41931	6.38015e-07
yhdT	1.25589	7.20536e-07
pldB	1.39815	7.91624e-07
yheN	2.94968	8.70822e-07
kil	1.92591	9.43484e-07
spr	-2.22686	1.36409e-06
asnC	1.37226	1.54006e-06
yhdE	1.16202	1.84515e-06
kdsC	1.38282	1.88121e-06
galE	-1.44511	1.94515e-06
gcvA	1.33707	1.94515e-06
udp	1.3586	1.97239e-06
panF	1.18554	2.18611e-06
rssA	1.3171	2.60863e-06
yheM	3.80525	3.16643e-06
yifL	1.34639	3.16643e-06
ubiH	4.85799	3.32625e-06
damX	-1.31868	3.73525e-06
ilvY	1.34093	3.90446e-06
rdgC	-1.1179	4.33663e-06
hdfR	1.29034	5.85916e-06
atpI	1.3754	6.23832e-06
rbsK	1.27477	1.04587e-05
ybcO	-1.25364	1.20799e-05
hemY	1.37278	1.32668e-05
wzzE	1.20712	1.36373e-05
trkA	1.18783	1.71912e-05
ubiX	4.15486	1.8157e-05
ninE	-1.09214	1.94647e-05
corA	1.22896	2.05159e-05
nagD	1.23962	2.05159e-05
ydfV	1.04899	2.38549e-05
yifB	1.23075	2.38549e-05
fruK	1.51436	2.58485e-05
bipA	1.53918	2.73271e-05
plsX	1.20921	3.46458e-05
guaB	1.20139	3.54864e-05
thiF	1.20697	3.54864e-05
rhlB	1.31421	3.59335e-05
pgpB	1.20315	3.84136e-05
rfaH	1.02345	3.87658e-05
holC	-2.69718	4.42717e-05
ydfB	-1.23719	4.73537e-05
frlR	1.30262	4.89002e-05
gspE	1.21158	5.21152e-05
prc	1.00311	5.21757e-05
iscR	1.0071	5.69794e-05
sdhB	-1.20432	5.75321e-05
zur	1.03406	5.79399e-05
dacA	-2.34442	6.0777e-05
ybiJ	-1.16245	6.0777e-05
ydgA	-1.23026	7.37608e-05
ylcG	-1.07965	7.4241e-05
yihU	1.16238	8.32338e-05
gidA	2.77737	8.40767e-05
ygfS	0.974732	8.53908e-05
fdhD	1.08437	9.79409e-05
yhfW	1.01521	9.79409e-05
ulaR	1.12799	0.000116676
yceD	1.49429	0.000120202
frwB	1.13678	0.000120886
dgkA	-1.12294	0.000121366
frwC	1.1329	0.000121366
gltA	-1.6409	0.000121366
ppiD	-1.02178	0.000121366
pstS	1.15568	0.000121366
rfaD	0.937347	0.000147229
rbsA	1.12274	0.000149274
rfaE	0.953677	0.000149274
rhtC	1.1111	0.000170855
cadB	1.1013	0.000174287
yigA	1.10029	0.000180615
ilvM	1.0991	0.000188848
dsbB	1.01823	0.00020073
glgB	1.12058	0.000205512
recD	-1.09984	0.000212691
atpA	0.953265	0.00021423
ilvL	1.08871	0.000226939
yhfX	0.947996	0.000234574
yieP	1.17413	0.000234574
gntY	1.13715	0.000268445
yhhP	2.41231	0.000268564
hemX	1.14176	0.00027948
ilvD	1.07469	0.000285951
recQ	1.08392	0.000286792
rhoL	1.07402	0.000290217
yajC	-1.07694	0.000290676
rfaF	0.91545	0.000316375
rbsC	1.073	0.000325869
hslV	0.94569	0.00032837
ycfQ	-1.20636	0.000332175
rpoS	1.41646	0.00034389
ytfN	1.06721	0.000347372
codA	-0.907759	0.000361743
pal	-1.2651	0.000361743
yhbY	1.12082	0.000361743
cysE	1.28367	0.000365512
rnt	2.22831	0.000371558
fdhE	1.02846	0.000445371
argC	1.02485	0.000479045
atpG	-1.04185	0.000506002
aslB	1.03353	0.000511487
nagA	1.03825	0.000511487
thiE	0.981034	0.00053292
yigI	1.03868	0.00053292
rbsD	1.03654	0.000554777
rpsO	3.02728	0.000568767
fadD	0.940362	0.000623972
cynS	-0.876916	0.0006615
selD	1.0289	0.00070126
yjeF	1.24305	0.00070126
yihR	1.0119	0.000721565
bglB	1.02298	0.000748104
yigB	1.00886	0.000752208
speB	1.05696	0.000779429
secB	-1.00829	0.000817756
yjfO	1.00586	0.000908712
yifO	1.00053	0.000930431
dedA	-1.02868	0.000969888
yadR	1.65242	0.000999476
cynX	-0.859254	0.00103075
fepE	-0.840572	0.00104894
bglF	0.98602	0.00107648
malK	0.880531	0.00107971
yhdA	0.85013	0.00109035
tolA	-1.06197	0.00112335
thiC	0.984366	0.00114528
yccK	1.85786	0.00114528
galU	0.895229	0.00116744
aidB	0.97563	0.00116822
rbn	0.983438	0.00118253
thiS	0.884807	0.00121504
lysS	1.08866	0.00127652
yrfF	0.882939	0.00131114
ptsA	0.967129	0.00136281
deoB	-0.959529	0.00141503
pflC	0.973611	0.00141712
aslA	1.00957	0.00143838
ddlA	-0.834166	0.00144399
tolB	-1.24747	0.00154697
yaiY	-0.840694	0.00154697
yieM	0.985388	0.00154697
araJ	-0.887514	0.00157995
sdhC	-0.958289	0.00159535
cpsB	-0.962337	0.00162633
argB	0.908965	0.00163699
glpR	-1.10456	0.00163699
yifK	0.953143	0.00168686
cytR	0.941862	0.0017031
proV	-1.07329	0.00170746
mdoH	-1.04342	0.00176686
mrcA	0.820347	0.00178948
yihD	0.944467	0.00181592
ybdJ	-0.809533	0.00184878
yheL	2.34145	0.00184878
tauD	-0.837726	0.00186812
ykgL	-0.930171	0.00193356
fdoG	0.948139	0.0019445
yifN	0.939596	0.00205701
yihT	0.932291	0.00215455
glpE	0.787087	0.00216147
ycgB	0.926015	0.0021862
yggH	0.944961	0.0022158
purE	-0.818939	0.00225447
yjeO	0.933035	0.0022673
yiiQ	0.833132	0.00228848
ppiB	-0.855045	0.00230405
xerD	2.37287	0.00234677
aroC	-0.93347	0.00235424
yraO	0.940483	0.00240745
amiB	0.971871	0.00247152
ybhE	-1.289	0.00251981
speA	0.917488	0.0026233
zntR	1.02258	0.00270531
yhbG	0.800974	0.00272044
ilvA	0.920212	0.00276881
frmR	-0.798407	0.00278476
fadA	0.916604	0.00279873
mhpR	-0.793274	0.00286216
ybcC	-0.835911	0.00286335
yigF	0.907619	0.00286335
lacA	-0.80954	0.00290484
fsaB	0.913922	0.00294883
rfe	0.936759	0.00294883
betT	-0.790476	0.00309688
fadB	0.908685	0.00315909
truB	0.949968	0.00315909
pheP	-0.769127	0.00316395
pstB	0.896586	0.00316895
yhgF	0.899485	0.00317867
thiG	0.905652	0.0032186
sthA	0.903381	0.0032316
lipA	1.45474	0.0035313
pldA	0.896635	0.0035313
yahB	-0.76629	0.00367727
kefG	0.893752	0.00377085
rfaC	0.765103	0.00377085
folM	-0.963977	0.00381091
ybbS	-0.744166	0.00413096
radA	0.75348	0.00414672
yzcX	0.97457	0.00420452
hslU	0.825244	0.00432732
ybbN	-0.790294	0.00436423
yahA	-0.767778	0.0044354
trkD	0.873965	0.00443844
nirB	0.886403	0.00445126
yaiP	-0.789253	0.00447808
codB	-0.75439	0.004539
pnp	-1.3264	0.004539
yaiO	-0.813227	0.004539
yahL	-0.746463	0.00461845
yaiW	-0.789486	0.00462557
glpG	0.734633	0.00465729
prkB	0.868176	0.00486839
yjfM	0.874856	0.00498121
deoD	0.741024	0.00525998
allA	-0.737315	0.00530024
dinB	-0.864193	0.00538491
nmpC	-0.765867	0.00538491
rhaB	0.868598	0.00538491
glpF	0.939724	0.00547601
trkH	0.866893	0.00547601
argE	0.863261	0.00548689
rna	-0.863957	0.00561632
yahK	-0.730383	0.00561632
yieI	0.867581	0.00561632
yigZ	0.853166	0.0056896
hflX	0.966733	0.00570974
yjfI	0.857479	0.00590773
ulaD	0.752779	0.00603255
cyaY	0.847455	0.00614463
ydfA	-1.02993	0.00616017
cynR	-0.849802	0.00628923
yaiL	-0.849255	0.00628923
nfrA	-0.727502	0.00633877
ybdD	-0.745444	0.00633877
aroM	-0.72484	0.00644165
trmA	0.793521	0.00645431
yihQ	0.850911	0.00648663
fdoI	0.91233	0.00654413
rffH	-0.840216	0.0065592
fepA	-0.760751	0.00660239
sdhD	-0.844104	0.00706824
ydfC	-0.829142	0.00710035
yiiD	0.863392	0.00723092
ftsX	0.839252	0.00730673
ampH	-0.737599	0.00731479
frmA	-0.791992	0.00768094
yedD	-0.918181	0.00774475
phnG	0.742523	0.00796981
yieN	0.835321	0.00796981
cadA	0.834709	0.00801131
ybcI	-0.82281	0.0085506
mog	0.828877	0.00868298
hflC	0.876055	0.0087437
frvB	0.817274	0.00877587
ybcH	-0.715745	0.00877587
treC	-0.821204	0.00888434
pflD	0.832002	0.00891839
ydhD	0.88106	0.00926462
rsd	0.75476	0.00934363
yrbG	0.815566	0.00937564
cueR	-0.692033	0.00955289
cusS	-0.720753	0.00958431
ylbA	-0.693604	0.00971603
yraP	0.81397	0.00981982
yeaH	0.800252	0.00984726
yeaG	-0.815776	0.00998525
ylbG	-0.687896	0.00998525
mdoG	-0.876931	0.0101447
glnL	0.804224	0.0101661
mhpT	-0.738054	0.0101661
yagL	-0.807238	0.0103957
yaiS	-0.690784	0.010426
paaD	0.768311	0.0104555
arcB	0.801818	0.0104935
gltD	0.6931	0.0105197
mutY	0.815138	0.010826
afuB	-0.810358	0.0108414
lar	0.798949	0.0108421
def	0.689425	0.0108712
thiH	0.805	0.0112187
rhaA	0.849922	0.0112576
entA	-0.691545	0.0114239
nfrB	-0.801195	0.0115463
yagW	-0.790798	0.0121091
rusA	-0.795971	0.0121271
tfaD	-0.680349	0.0121271
ykiB	-0.676195	0.0121271
yagU	-0.787529	0.0122536
yihF	0.78771	0.0122536
yihL	0.898753	0.0128496
fabR	0.78205	0.0132563
xerC	1.02002	0.0136634
ybbD	-0.668984	0.0136634
ybdH	-0.679761	0.0142818
yihG	0.784274	0.0142818
ftsN	0.786085	0.0143426
intD	-0.669126	0.0143426
ybbA	-0.660681	0.0143426
glpK	0.654997	0.014469
yihS	0.79235	0.014469
yqaE	-0.894494	0.0146147
php	0.779736	0.0146677
entD	-0.733171	0.014773
ycbZ	-1.08298	0.014773
dnaB	0.857771	0.0148422
yhcC	0.74381	0.0149766
proW	-0.833622	0.0152615
renD	-0.661053	0.0152615
rhtB	0.776191	0.0152859
yaiF	-0.719888	0.0152868
ybaJ	-0.767618	0.0156664
htrC	0.771379	0.0158955
rph	0.710049	0.0158955
ykgA	-0.770946	0.0160139
ulaB	0.748005	0.016332
metB	0.76497	0.0164285
ybcF	-0.751265	0.0165505
dcuA	0.766964	0.01669
yhdW	0.6604	0.01669
gspG	0.902551	0.0167268
frvX	0.75893	0.0169793
asnA	0.765889	0.0170355
cyaA	0.767743	0.0174601
argH	0.757221	0.0176243
yihI	0.77725	0.0177691
phoB	-0.647962	0.0179131
sbmA	-0.651892	0.0181141
rfaG	0.662872	0.0181585
ung	-0.897639	0.0183526
mioC	0.756562	0.0185318
gspH	0.85357	0.0187039
mltC	0.758163	0.0187039
pepQ	0.755592	0.0187039
ybcV	-0.705482	0.0187133
yfcN	-1.16832	0.0187133
metE	0.898259	0.018872
nudC	0.74	0.0189164
ycbG	-1.08013	0.0189164
hokE	-0.661231	0.0189354
yedR	-0.752764	0.0189354
yceB	-0.921122	0.0191163
trmE	2.58118	0.0191892
ytfJ	0.757065	0.0191892
envY	-0.648194	0.0192221
glgX	0.753477	0.0192681
yqaB	-0.838052	0.0192681
yjeI	0.844463	0.0192751
minC	-0.829851	0.0196861
ykgJ	-0.751062	0.0196861
yjfN	0.75051	0.0198806
afuC	-0.747268	0.0199305
nrdI	-0.740369	0.0199431
selA	0.652899	0.019968
fdrA	-0.739179	0.0202364
yjfP	0.717153	0.0202364
sucD	-0.876895	0.020391
frdA	0.739536	0.0216552
proX	-0.74698	0.0216608
emrE	-0.638524	0.0219073
nanR	0.639466	0.0219073
ylaB	-0.65086	0.0222344
ybaS	-0.637737	0.0223745
ylbH	-0.624335	0.0226396
ybaK	-0.669205	0.0227901
ybdL	-0.622735	0.0227901
fadE	-0.735644	0.0229633
atoD	0.749727	0.0230439
ykgB	-0.729975	0.0231064
yaiU	-0.726574	0.0231731
yihO	0.731213	0.0234161
ybbM	-0.65305	0.0235093
betA	-0.643335	0.0235361
yafP	-0.733067	0.0235669
tauC	-0.621573	0.0236738
cutA	0.746269	0.0236931
yhdY	0.652551	0.0239388
ybbO	-0.729009	0.024141
ycbJ	-1.16659	0.0246137
ybdB	-0.621205	0.0246274
moaA	0.817026	0.0247885
rmuC	0.73057	0.0247885
rluD	0.745198	0.0251601
ybcJ	-0.675305	0.0253901
gph	0.616845	0.0254001
entC	-0.625101	0.0255263
ykfF	-0.721764	0.0258313
nudH	-1.02679	0.0259384
yigL	0.721709	0.0259384
npr	0.660903	0.0259519
fimZ	-0.618201	0.0261212
mhpE	-0.622819	0.0261465
yihN	0.718964	0.0264328
cbrC	0.723758	0.0265387
cstA	-0.611328	0.026634
yajD	-0.642284	0.0268659
yafM	-0.710962	0.0268742
frmB	-0.717128	0.0271535
phnF	0.687215	0.0271535
ybbB	-0.611321	0.0271535
yfbE	0.738825	0.0271535
zraS	0.696423	0.0271535
rpoZ	0.611791	0.0272331
minD	-0.759841	0.0272432
yijF	0.702771	0.0273033
envR	0.611074	0.0274537
ndk	0.843911	0.0274537
mmuP	-0.707994	0.0274583
ykgD	-0.713657	0.0275138
sohA	1.13753	0.0280608
nuoA	0.713758	0.0280833
sbcC	-0.607713	0.0280833
mak	-0.608149	0.0282077
moaC	0.737716	0.0285447
ushA	-0.604704	0.0285766
ybaB	-0.679904	0.028761
yihP	0.710796	0.0288425
essD	-0.607794	0.0288489
yaiZ	-0.613762	0.0290232
yedA	-0.75445	0.0293702
fepG	-0.693145	0.0295469
gltI	0.701208	0.0296046
ompT	-0.698892	0.0296046
ybcS	-0.613655	0.0296246
ulaA	0.706702	0.0297673
metR	0.88044	0.0300456
mraZ	0.683942	0.0302441
yfaD	0.706247	0.0303512
ykgE	-0.69869	0.0307999
znuA	0.702656	0.0307999
allD	-0.598821	0.0309596
rlmB	0.696395	0.0310616
cynT	-0.62384	0.0310654
entE	-0.60329	0.0312127
metF	0.94616	0.0312127
ftsE	0.975935	0.0322468
tauB	-0.67968	0.0324175
ybaT	-0.592966	0.0325558
rfbC	-0.696938	0.0326713
ybdA	-0.656123	0.0326713
mhpF	-0.668177	0.0327343
rarD	0.693802	0.0327343
ykgG	-0.617732	0.0327343
ylbF	-0.632283	0.0327343
ybcK	-0.603402	0.0327391
yihX	0.692044	0.0330936
cspA	0.670499	0.0334558
caiT	0.684774	0.0337145
citC	-0.860517	0.0337145
frvA	0.686767	0.0337145
mdlA	-0.591579	0.0337611
cof	-0.649086	0.0338825
yigG	0.694343	0.033962
acrE	0.621588	0.0340591
mhpD	-0.624578	0.0340591
yeeT	-0.682856	0.0340591
tatB	1.11255	0.0348733
phnD	0.603089	0.0350344
ykiA	-0.584206	0.0350735
rhaT	0.685398	0.0350882
phnC	0.597058	0.0351015
moaD	0.747531	0.035235
rpiR	0.668616	0.035235
sufA	0.683816	0.035235
yaiC	-0.654067	0.0352468
glmM	1.68801	0.0355089
yahG	-0.59005	0.0355089
gor	0.729541	0.0355443
yaiT	-0.601326	0.0355443
ybcQ	-0.586327	0.0355443
ybbY	-0.621343	0.0355858
ybdG	-0.682785	0.0355858
allB	-0.676453	0.0359025
degQ	0.589763	0.0362822
kdpD	0.679724	0.0365743
ytfQ	0.809268	0.0367942
yaiE	-0.578362	0.0371194
ykfH	-0.672913	0.0371194
dsbG	-0.609279	0.0371389
tatE	-0.674	0.0373674
rraA	0.679404	0.0379217
nanE	0.629557	0.0382537
ybaA	-0.621163	0.0383064
zraP	0.640989	0.0383064
yagX	-0.676753	0.0383632
yieF	0.574716	0.0384399
ybbK	-0.574723	0.0386606
rnb	0.981586	0.0390669
prpC	-0.593805	0.0391749
prpE	-0.570834	0.0391749
ybbC	-0.576558	0.0391749
ykfI	-0.674813	0.0391749
ypjD	-0.689553	0.0393999
livK	0.665247	0.0398134
icd	2.59806	0.0399075
eaeH	-0.670558	0.0404826
ykgM	-0.569631	0.0409472
ybdN	-0.577038	0.0410001
yajI	-0.661353	0.0421165
ybcY	-0.563392	0.0421167
ybdM	-0.566017	0.0421457
ubiG	0.665326	0.0425189
barA	-0.580973	0.0428435
glnG	0.657821	0.0431275
aroB	-0.671436	0.0436435
mraW	-0.892756	0.0436435
mhpC	-0.635481	0.0438886
cyoA	0.561502	0.0441092
rng	-0.809772	0.0441092
yhgN	0.660849	0.0441092
recR	-0.673807	0.0444457
ybaY	-0.574907	0.0449314
yagQ	-0.65325	0.0451709
ytfB	0.659532	0.0453121
smtA	-0.679656	0.0456921
ykfC	-0.652734	0.0459666
fsr	-0.575501	0.0461172
yaaY	1.0327	0.0464698
yfgA	-2.32711	0.0464698
yejL	0.65138	0.0466211
proP	0.659315	0.0482605
ulaC	0.646061	0.0482605
ruvA	-0.653124	0.0483232
psiF	-0.606421	0.0483933
glpC	0.645914	0.0487156
yfjO	-0.674623	0.0487156
kdsD	0.695154	0.0493007
ydjF	0.663872	0.0493302
ulaG	0.588881	0.0494477
phoR	-0.550292	0.0497069
ybiO	-0.666347	0.0497273
yidD	5.85514	0.0497273
rzoD	-0.633243	0.0501146
yajB	-0.557806	0.0501154
yraM	0.643425	0.0501603
glgA	0.648287	0.0501994
pykF	0.645834	0.0501994
yrdA	0.565036	0.0507666
rbsB	0.638998	0.050944
ysgA	0.668287	0.050944
ykgF	-0.638045	0.0510319
nrdF	-0.643997	0.0518841
yhdN	0.564052	0.0518841
yafO	-0.637109	0.0524515
glnK	-0.61295	0.0529031
yraN	0.634632	0.0529828
cadC	0.639388	0.0530407
citT	-0.647205	0.0534299
ycjT	0.639054	0.0534299
dtd	0.637853	0.0535393
pspA	-0.60959	0.0537397
yagP	-0.643545	0.0537397
yeiU	-0.648158	0.0537397
yjbC	0.635566	0.0538723
hyfI	-0.661357	0.0563814
ynhG	0.635052	0.0568146
mhpA	-0.626266	0.0570561
smpA	0.622102	0.0570561
yagM	-0.660481	0.0570561
ycjU	0.6266	0.0570561
ppc	0.633979	0.0570904
ybaQ	-0.545591	0.0575904
ycjV	0.536695	0.0575904
yjeP	0.62638	0.0575904
ykgN	-0.648346	0.0575904
fadL	0.61069	0.0584537
yiiS	0.629015	0.0589206
ymjB	0.562727	0.0593378
lon	-0.631819	0.0593721
tesB	-0.536664	0.0596598
cusA	-0.593191	0.0598851
yejK	0.652258	0.0612995
allC	-0.623191	0.0619509
yahC	-0.530792	0.0619509
yihV	0.624343	0.0624377
nirD	0.611567	0.0636303
prfH	-0.619851	0.064303
ybcM	-0.536171	0.0643561
mdlB	-0.566331	0.0647679
yjfL	0.596997	0.0649398
tsgA	0.612647	0.066092
ugpB	0.545191	0.0662403
bioA	-0.679685	0.0664173
amtB	-0.58453	0.0666414
ykgI	-0.617084	0.0666414
glxR	-0.541359	0.0671871
yhgA	0.662136	0.0672162
yjdJ	0.613472	0.0673111
feoA	0.609303	0.067386
yaiV	-0.522953	0.0681263
ykgC	-0.613028	0.0681263
yfjN	-0.628658	0.0681856
ybaL	-0.531087	0.068978
lpcA	0.612085	0.0695124
gntX	0.660753	0.0696571
smf	0.5127	0.0709779
hha	-0.53844	0.0723586
dgoR	0.627888	0.0729497
dinJ	-0.603235	0.0729497
yjfJ	0.606498	0.0729497
kdgT	0.604481	0.0729674
nagB	-0.601821	0.0733842
cysQ	0.655056	0.0740338
iclR	0.606243	0.0740338
yzfA	0.603799	0.0741896
cspD	-0.654711	0.074281
yiiR	0.570862	0.0742904
yoeA	-0.604234	0.0742904
yaiX	-0.522551	0.0748141
caiA	0.603685	0.0748743
ivy	-0.625716	0.0753662
fruB	0.602317	0.0758129
ibpA	0.507588	0.0758129
stpA	-0.601591	0.0760519
yfbW	0.598941	0.0766475
htrG	-0.592744	0.0769989
ybaX	-0.509599	0.0769989
yhdH	0.510175	0.0769989
yieL	0.596105	0.0772719
ytfA	0.593927	0.0777161
ycfR	-0.598431	0.0779604
yhdX	0.590928	0.0779604
yjgA	0.641212	0.0780233
sbp	0.596959	0.078134
yijP	0.606007	0.078134
brnQ	-0.521674	0.0791185
modF	-0.634157	0.0791514
pdxB	-0.744832	0.0795793
yfdG	-0.590148	0.0795793
yiiX	0.586674	0.0795793
ydjY	0.587806	0.0799531
pepP	0.607385	0.0802939
srlD	-0.593476	0.0803408
yfbF	0.589103	0.0807891
yijE	0.589618	0.0807891
yhdL	0.502669	0.0808249
gltF	0.513579	0.0811385
envZ	-1.03271	0.0814325
rpmF	1.42108	0.0818281
upp	0.587678	0.0821798
ybcL	-0.58756	0.0822415
rfaY	0.512319	0.0824055
ypaA	0.583376	0.0824065
yfbV	0.516805	0.0825895
ycaD	0.583001	0.0827137
aroA	-0.589132	0.0827151
cspC	0.497442	0.0827151
yahO	-0.497679	0.0827151
ybiX	-0.617078	0.0827151
yidQ	0.496002	0.0827151
mscL	0.527562	0.0832194
aroG	-0.666228	0.0847193
glcF	0.579648	0.0847193
aes	-0.578163	0.085746
cusR	-0.498195	0.085746
yfbL	0.585452	0.085746
yieG	0.605147	0.0859408
cusB	-0.499086	0.0869673
yagH	-0.67827	0.0874113
ascF	-0.60032	0.0874851
frwD	0.564068	0.0874851
nfi	0.581339	0.0874851
proA	-0.579623	0.0874851
recJ	-0.487581	0.0874851
rssB	-0.579953	0.0874851
yjeJ	0.587749	0.0874851
phoA	-0.566754	0.0877124
recE	0.613378	0.0886185
ykgH	-0.549011	0.0886898
tesA	-0.493373	0.0890888
aegA	-0.577362	0.0895056
rhaD	0.579149	0.0899893
rnc	1.91764	0.090045
yjbE	0.57253	0.090045
fsaA	-0.571898	0.0901446
fxsA	0.571034	0.0901547
yhbS	0.605054	0.0908712
yggL	0.590126	0.0908844
phnE	0.52972	0.0909965
yagA	-0.615205	0.0909965
yagT	-0.571145	0.0914774
elaC	0.576525	0.0922233
yqjA	0.492693	0.092885
nuoH	0.566242	0.0952425
ybbL	-0.480632	0.0963727
copA	-0.510046	0.0976524
atoE	0.582297	0.0976992
ybhO	-0.575664	0.0980642
paaA	0.565425	0.0985124
entF	-0.562783	0.0991551
gspA	0.567274	0.0995437
yccF	-0.706445	0.0998451
ybfA	-0.579295	0.100619
ygfY	-0.9391	0.102015
ybiP	-0.563021	0.102159
gpt	-0.572055	0.102489
lpp	0.555488	0.103944
hemN	0.572786	0.104379
mtlR	0.489736	0.105908
rhaR	0.560459	0.105908
yagB	-0.562466	0.106865
sfmH	-0.558448	0.107117
napA	0.560998	0.107317
nrfG	0.474516	0.107317
proY	-0.499336	0.107317
ampD	-0.567198	0.107421
bioH	0.563094	0.107421
ccmE	0.566877	0.107421
dsrB	-0.560528	0.107421
feoB	0.562797	0.107421
sfmA	-0.548585	0.107421
tyrA	-0.580453	0.107421
yidR	0.470944	0.107421
yihM	0.557864	0.107421
yjjI	0.555572	0.107421
argO	0.566315	0.10768
ynfN	0.483575	0.108267
yebZ	0.477515	0.108487
yhgE	0.596318	0.108617
yeeX	-0.854612	0.108749
yjfY	0.547601	0.109505
mmuM	-0.654371	0.1099
ccmB	0.547014	0.109933
mltB	-0.621856	0.110042
yfhG	-0.603982	0.11094
ybcD	-0.549977	0.111618
maa	-0.474517	0.111932
ybeQ	-0.590991	0.112951
yjdL	0.550844	0.112951
cysZ	-0.54338	0.112975
glpD	0.476213	0.112975
sbcD	-0.467341	0.112975
yafL	-0.549216	0.112975
ddpD	0.544053	0.113612
hypF	-0.542214	0.113612
rlpA	-0.546363	0.113612
yeeZ	-0.548128	0.113894
gmd	-0.554275	0.115143
yjaA	0.653226	0.115143
nrfE	0.524533	0.115503
aceA	0.547036	0.115643
yhfT	0.541464	0.116716
yfaP	0.55471	0.117392
sfsB	0.550486	0.117574
ybhR	-0.54366	0.118995
malP	0.542807	0.119448
fliZ	-0.574213	0.119507
hofQ	0.526151	0.119841
yjdI	0.535875	0.119918
rsxB	0.569514	0.12007
yqaD	-0.494819	0.12007
bcsB	0.525793	0.121521
glnE	-0.540508	0.121716
sfmC	-0.535173	0.121716
inaA	0.55418	0.121982
paaC	0.484643	0.121982
yfaW	0.533916	0.121982
galR	-0.483889	0.121982
moaE	0.623442	0.122141
dcuD	0.489058	0.122428
acrR	-0.462945	0.122666
ybeZ	-0.569893	0.122666
leuA	0.532121	0.123132
yffB	-0.460681	0.123132
yjeB	0.884627	0.123132
yagY	-0.537459	0.123601
phoE	-0.534502	0.125371
emrB	-0.535604	0.12541
pabA	0.535491	0.126023
betI	-0.471868	0.126346
rtn	0.532941	0.126346
hslO	0.499428	0.127015
ytfL	0.573361	0.127015
ygaW	-0.533009	0.127405
yhfU	0.528715	0.127926
fhuB	-0.614053	0.130141
pioO	0.595817	0.130453
iaaA	-0.523647	0.131127
cpxP	0.526236	0.131329
glpX	0.523336	0.132143
btuB	0.517631	0.13303
modB	0.528047	0.133362
menB	0.718602	0.133685
recX	-0.604471	0.134606
yfbN	0.525617	0.134902
aspA	-0.557813	0.135192
intF	-0.523996	0.135529
yhbO	0.532029	0.136133
mntR	-0.512493	0.136241
ytfF	0.522215	0.136473
paaF	0.45333	0.136919
rfaJ	0.444147	0.137024
frlD	0.523973	0.137182
slyD	0.522719	0.137182
yjfC	0.512958	0.137182
ygaX	-0.519556	0.137219
yhcD	0.451221	0.137219
cysB	0.501792	0.137602
rzpD	-0.495732	0.14015
yfbR	0.516744	0.140716
aceK	0.520293	0.140733
glnH	-0.526958	0.140781
ybaD	0.458614	0.140897
ycdX	-0.513236	0.141297
proC	-0.516639	0.14137
yegL	-0.513291	0.14137
zitB	-0.656294	0.14137
ais	0.517898	0.142287
topB	-0.539841	0.142578
ygbA	-0.517353	0.142941
ymdE	-0.586935	0.142941
chpB	0.531627	0.143089
phnH	0.454971	0.143695
gldA	0.515553	0.145491
ykfA	-0.509755	0.145491
ybiA	-0.530334	0.145509
yafS	-0.564007	0.145579
citB	-0.517218	0.146795
thiM	-0.516671	0.146795
yiiM	0.514491	0.146805
ykfJ	-0.512905	0.148616
ypfG	-0.435384	0.148616
citF	-0.510113	0.148644
citA	-0.505271	0.149884
phnI	0.499959	0.150488
sucC	-0.504983	0.150532
ycaO	0.507077	0.150532
ydjL	0.511812	0.150713
yfaA	0.514447	0.15096
ykfB	-0.506632	0.15096
tolC	1.29432	0.151028
glxK	-0.44447	0.151488
ybdR	-0.50886	0.151488
ilvB	0.429693	0.152107
prpR	-0.478092	0.152107
ppk	-1.70601	0.152581
sodA	0.508492	0.152581
ugpC	0.508549	0.152581
fkpA	0.5036	0.153104
cdh	0.505669	0.15435
mbhA	-0.501976	0.154612
potD	-0.504802	0.154951
ytfI	0.515046	0.155489
ybiI	-0.431879	0.156974
crcA	-0.508222	0.157372
ytfP	0.49149	0.157372
kbaZ	0.499525	0.157516
cbrA	0.427899	0.157686
pfkA	0.494123	0.157686
rihA	-0.498574	0.157686
ygcR	-0.503591	0.157686
ydjK	0.497577	0.157983
yiiU	0.505504	0.158569
tdh	0.420714	0.158662
yjbG	0.453057	0.158668
tus	0.501302	0.159311
yafN	-0.523786	0.159491
dhaK	0.501607	0.159545
ygjF	-0.498446	0.159856
lysU	0.450636	0.159927
hrpA	-0.50104	0.159949
hslJ	-0.433964	0.160321
smg	0.427919	0.160321
yhhF	-0.495842	0.160321
rfaK	0.422872	0.161037
citX	-0.49568	0.162818
yrhB	0.498768	0.162818
yjcQ	0.439659	0.164223
yagV	-0.495598	0.164412
yhgG	0.50457	0.164412
ybbV	-0.416958	0.164722
nrdE	-0.49113	0.164901
rhaS	0.496444	0.164901
yjjK	0.49191	0.164901
agp	-0.551777	0.164957
yjaG	0.489453	0.166001
acrF	0.438764	0.1663
yfgI	-0.691629	0.1663
yidK	0.420929	0.166595
garP	0.488626	0.166635
gntK	0.494358	0.167096
yraI	0.489056	0.167096
yfeS	-0.444587	0.167302
ybcW	-0.493695	0.167348
agaA	0.487445	0.167398
dcuR	0.48624	0.168156
glnB	0.490203	0.168156
bcsA	0.455314	0.168436
yjbF	0.483804	0.168436
yhfK	0.543902	0.169279
yegH	-0.487049	0.169589
torA	-0.455278	0.17051
yjdK	0.487646	0.170631
ydaU	0.487741	0.170915
tldD	0.464574	0.171023
ybaE	-0.423899	0.171023
yhhL	0.452344	0.171023
yfiB	-0.522515	0.171109
ytfH	0.484067	0.171109
agaV	0.489062	0.171375
aspC	-0.8631	0.1714
yfbG	0.48334	0.17217
yhcM	0.482967	0.172564
gadC	-0.444029	0.172616
ycdG	-0.584889	0.17307
purK	-0.43638	0.174288
yhdV	0.453335	0.174288
yqaA	-0.485389	0.175486
bcr	0.487484	0.175572
yedJ	-0.481117	0.176009
eptA	0.481267	0.176619
yafW	-0.48329	0.176928
yfgD	-0.540248	0.176928
yheT	0.583269	0.176928
ysaB	0.425824	0.176928
ylcE	-0.742904	0.178628
sseB	-0.516618	0.179003
fldB	0.408095	0.179256
adiA	0.47929	0.179468
yrfG	0.460236	0.179722
hycI	-0.482159	0.179734
ompL	0.464526	0.180534
zraR	0.431389	0.180669
yccS	-0.479263	0.180903
yhbC	1.97571	0.180967
yedW	-0.474584	0.181239
yfiN	-0.498229	0.181239
mltD	-0.52281	0.182001
yiiF	0.758758	0.182244
malE	0.411911	0.182367
yahJ	-0.441507	0.182367
glnQ	-0.479573	0.182454
ypeA	-0.454512	0.182898
kefB	0.487983	0.183526
ytjB	0.472692	0.184417
yacL	-0.52355	0.184871
yrfD	0.463192	0.184871
fabH	2.45971	0.184958
yeeE	-0.471508	0.184958
yfjM	-0.480625	0.185667
argT	0.476295	0.186982
yjeN	0.798496	0.186982
yafX	-0.47122	0.187419
yieK	0.474466	0.188913
yraJ	0.474255	0.189198
ycdT	-0.52838	0.189442
narH	0.467797	0.189761
uhpB	0.457183	0.189834
tauA	-0.458066	0.189995
astA	0.471564	0.190062
yfiR	-0.527888	0.190062
yjfZ	0.471723	0.190062
yhfA	0.470485	0.190201
yjeT	0.472983	0.190201
rfaS	-0.405139	0.190476
yiiG	0.471882	0.190476
pepE	0.465552	0.19094
yjbH	0.457584	0.191768
uvrC	0.503311	0.191988
yfbO	0.470414	0.193481
yqfA	-0.505236	0.193481
modC	0.463638	0.195453
ypfH	-0.455154	0.195453
norV	-0.463426	0.195616
treB	0.445831	0.196158
ruvB	-0.461619	0.196917
yijD	0.463791	0.196917
hycG	-0.461454	0.197028
phnN	0.462255	0.197028
betB	-0.405543	0.197586
djlC	-0.461072	0.197586
proB	-0.446021	0.197586
rpmI	5.15206	0.197586
ygaQ	-0.462478	0.197586
yjcP	0.466684	0.197586
yqjB	0.45289	0.197586
yrfB	0.466537	0.197586
mhpB	-0.423393	0.199031
narX	0.473053	0.19905
napG	0.507192	0.20019
yrdB	0.46654	0.200648
ycjP	0.404084	0.200921
menF	0.46522	0.201318
yhfG	0.459233	0.202215
pepD	-0.462259	0.20235
agaD	0.457032	0.202955
uidA	0.467089	0.202975
purD	0.436859	0.203693
ypjA	-0.455912	0.203693
mtgA	0.4558	0.204473
ybiM	-0.458559	0.204473
ypfJ	-0.451709	0.204473
uspG	-0.467366	0.205121
yjeH	0.460423	0.205121
aaeA	0.439577	0.205255
ygeD	-0.412301	0.205255
selB	0.396056	0.207041
yoaE	0.458054	0.207215
ulaF	0.421555	0.207438
yidA	0.758635	0.207515
amn	-0.968033	0.207783
yaiB	-0.388633	0.207783
xylE	0.457352	0.207886
potB	-0.456941	0.208109
yiaN	0.428115	0.209298
ytfM	1.02184	0.20949
prpD	-0.423331	0.209586
trpE	0.456166	0.209586
yphH	-0.48186	0.209586
dinF	0.405451	0.211018
ykfG	-0.449912	0.211018
yhcH	0.391507	0.211256
yidL	0.381116	0.2118
dgoK	0.489164	0.212822
glgC	0.452078	0.212919
gspD	0.610623	0.212919
kgtP	-0.463749	0.212919
metL	0.429147	0.212919
ybbW	-0.392825	0.212919
ygaM	-0.452174	0.212919
apt	-0.38603	0.213238
djlB	-0.448203	0.213238
ybfE	0.493584	0.213238
ygeW	0.433861	0.213328
pmrD	0.463932	0.214748
yhcG	0.43146	0.214748
alsA	0.42397	0.215343
glnP	-0.448181	0.215343
melR	0.453808	0.215343
yiiL	0.544967	0.215343
yagS	-0.452333	0.215665
ydiB	0.450784	0.215665
ylaC	-0.394095	0.215802
ybeT	-0.451437	0.216014
cobC	-0.562999	0.216819
yidX	0.444016	0.217551
ybjX	-0.444118	0.218292
yeeP	-0.443379	0.218292
glcE	0.447608	0.218479
cld	-0.448451	0.21884
mobB	0.448566	0.21884
wrbA	-0.484119	0.21884
agaR	0.467732	0.219265
sfmF	-0.447859	0.219568
minE	-0.519287	0.219616
yafV	-0.445205	0.219616
ydgI	0.446015	0.219616
ugd	-0.503778	0.220136
ycfM	-0.444445	0.221465
pyrD	-0.45958	0.221498
ydgH	0.442206	0.221786
yfiD	-0.443432	0.222391
yhbW	0.447362	0.222426
sdiA	-0.452635	0.22317
yodB	-0.443741	0.22317
yiaK	0.377967	0.223667
rtcB	0.43855	0.224401
trpD	0.442232	0.224401
menD	0.460066	0.224715
ymdF	-0.471005	0.225065
ybhD	-0.439389	0.225637
btuC	0.479231	0.226021
frlA	0.447659	0.227365
sdaA	0.376381	0.227365
yheS	0.451556	0.227365
blr	-0.48423	0.228379
gadX	0.439283	0.230086
yaiI	-0.440309	0.230086
yobF	0.373458	0.230086
aaeB	0.425821	0.230827
glvC	0.379957	0.230827
narG	0.434049	0.230827
yfbJ	0.434307	0.230827
yhhT	0.43613	0.230827
nuoB	0.45566	0.232539
ypjJ	-0.436931	0.232539
rcsF	-0.449084	0.233125
yhcO	0.389791	0.233125
nuoC	0.487733	0.234277
ycaR	-0.456296	0.234277
yfjW	-0.431953	0.234277
ygfB	-0.611352	0.234277
yhcF	0.371483	0.234277
nikB	0.408892	0.234791
yhdJ	0.373646	0.234791
yagZ	-0.435302	0.235726
fhlA	-0.435958	0.236607
relA	-0.469228	0.236607
yrbB	0.429512	0.236607
ompA	-0.591689	0.236851
ycdC	-0.428781	0.238052
yjeK	5.0077	0.238052
ytfE	0.438339	0.238052
fpr	0.430744	0.238834
yafQ	-0.430875	0.239134
pphB	-0.428034	0.240963
yiiT	0.425734	0.240963
malM	0.397629	0.241312
yfiH	-0.453314	0.241421
avtA	0.366176	0.241623
cspG	-0.415902	0.241623
torS	-0.402699	0.241623
ybaM	-0.370051	0.241623
ybeH	-0.456564	0.241623
yejH	0.435291	0.241623
ygaZ	-0.428031	0.241623
yqaC	-0.430685	0.241623
ggt	0.429301	0.242999
cobU	-0.429598	0.243967
aroF	-0.424244	0.244083
yjeM	0.452535	0.244122
glvB	0.371233	0.244844
hflK	0.424478	0.245476
moeB	0.457328	0.246452
ygcM	-0.427907	0.246452
gloB	-0.663963	0.246923
ycdH	-0.508355	0.246923
yiaJ	0.377551	0.246923
aceB	0.426292	0.247945
fic	0.527927	0.248777
ycdQ	-0.448529	0.24965
ycjM	0.408139	0.24965
fixB	0.425218	0.249957
yjfK	0.42198	0.249957
yfbH	0.441614	0.253847
yebU	0.359309	0.254427
ivbL	0.356976	0.256008
yfbQ	0.423827	0.256008
arpA	0.392383	0.25611
moeA	0.473271	0.257845
yfcC	0.453663	0.25937
alsC	0.401355	0.259371
btuF	0.417345	0.259371
usg	-0.414619	0.259371
yccJ	-0.41797	0.259371
yhdU	0.36375	0.259371
lysA	-0.402519	0.261172
crr	0.366513	0.261394
yedO	-0.420137	0.261394
yhfS	0.421057	0.261394
yjeS	0.418379	0.261394
yoeB	-0.418408	0.261394
pfs	1.55706	0.262121
acrD	-0.35353	0.263253
fliE	0.439426	0.263446
ydcI	0.371604	0.264679
mrcB	-0.416124	0.264773
rfbB	0.413887	0.264773
yagR	-0.442126	0.264773
yajO	-0.38551	0.264928
ycdY	-0.483903	0.266225
nanA	0.36231	0.26626
rnd	-0.410088	0.267137
paaB	0.371772	0.269074
potE	-0.436818	0.269341
yhfY	0.412396	0.269468
ygdE	-0.409136	0.271851
cycA	0.412128	0.272181
ccmD	0.454459	0.273336
ycdO	-0.420444	0.273811
yeeN	-0.409668	0.274207
ypeC	-0.354889	0.274715
yfbM	0.405494	0.275316
nudB	-1.35986	0.275662
endA	0.401521	0.276371
yegI	-0.406857	0.277167
ychJ	-0.415902	0.277391
yfgF	-0.460164	0.277712
prmA	0.360849	0.279031
rpe	2.91823	0.279031
yjaB	0.401417	0.279031
nadB	-0.402804	0.280836
adiY	0.40945	0.281267
emrA	-0.402139	0.281267
uxuR	0.468232	0.281267
ybiY	-0.417392	0.281352
yrfC	0.405883	0.281352
ygcG	-0.405928	0.281998
yhaC	0.407421	0.282183
xseA	-0.50784	0.282312
rluA	0.397718	0.282937
gcl	-0.362516	0.283971
yidH	0.345033	0.284274
ampG	-0.37277	0.284292
yiaM	0.347245	0.284495
dgoA	0.430837	0.284566
wcaL	-0.393758	0.284566
ybiS	-0.403503	0.284835
ypjC	-0.397616	0.284835
metN	-0.338981	0.285002
setC	0.341534	0.285809
yfaH	0.404183	0.285847
atoA	0.420391	0.28654
phnO	0.36901	0.286901
vacJ	-0.397295	0.286901
gutM	-0.426355	0.288426
norW	-0.396706	0.288426
yidI	0.34114	0.288426
ilvN	0.336892	0.28931
pncB	0.396021	0.289764
lldR	0.341985	0.292183
sucB	0.39494	0.292183
ymcA	-0.578083	0.29315
yeeA	-0.367729	0.293398
greB	0.470027	0.293672
gsk	-0.349034	0.293672
slyX	0.464649	0.293672
yoaD	0.341459	0.293672
yjcZ	0.396443	0.295458
uvrY	-0.419296	0.296046
yrfA	0.401806	0.299236
nrfF	0.365804	0.299855
sixA	-0.380315	0.299855
ycdU	-0.512014	0.299855
ucpA	-0.358334	0.300952
ulaE	0.394498	0.301131
ygcE	-0.362466	0.301451
rbbA	0.346745	0.301732
hyfR	-0.59115	0.303643
srlE	-0.390735	0.304391
yegJ	-0.385269	0.304391
chiA	0.431529	0.304439
pck	0.369528	0.304439
purA	0.392356	0.304439
ydfU	0.377714	0.306261
ybaO	-0.390858	0.307211
malZ	-0.361441	0.308738
yfeY	-0.377794	0.310343
ccmF	0.387745	0.311209
flgL	-0.38534	0.31165
yehD	0.386315	0.31165
yfaY	0.38628	0.31165
ygaC	-0.387472	0.31165
ydiN	0.386931	0.312221
glpB	0.431471	0.312688
ybgC	-0.434401	0.312688
bcp	-0.330432	0.313361
frlC	0.387473	0.313402
ybgF	-0.433603	0.314278
oxyR	3.22602	0.315785
malG	0.340962	0.316474
flgG	-0.380529	0.316917
tdcB	0.429458	0.316917
yfgM	-0.404512	0.318724
yceG	-0.382053	0.319838
ygdD	-0.369547	0.320164
helD	-0.334892	0.320433
yeeR	-0.383521	0.321116
polA	0.381269	0.321144
yagJ	-0.377975	0.322602
sanA	0.369742	0.32297
umuD	0.380754	0.323646
paaE	0.381728	0.323991
talB	0.323599	0.324896
yfaV	0.391379	0.324955
adiC	0.378236	0.325333
ydhV	0.380167	0.325333
yjcD	0.363471	0.325333
yqfE	0.402203	0.325412
nanT	0.380606	0.32574
xthA	0.391863	0.325949
ybfC	-0.378027	0.325949
ygbI	-0.379965	0.325949
gcvT	0.451786	0.326519
speE	0.745073	0.326537
yhiN	0.322311	0.326659
srmB	0.507075	0.326946
abgB	0.391696	0.326966
mgsA	-0.380382	0.328701
rffT	-0.404655	0.33027
yidE	0.316675	0.33064
glpT	0.375677	0.331069
ygaH	-0.377359	0.331069
prpB	-0.319862	0.331176
ypdA	0.352014	0.331749
cmtB	0.54428	0.332492
xapA	-0.370403	0.332492
dcuB	0.369018	0.337061
kbl	0.313971	0.338849
yneE	-0.373774	0.338849
yciC	0.369162	0.340379
cobB	-0.42788	0.341016
dacD	-0.372209	0.341016
yebN	-0.321099	0.341016
ygfZ	1.426	0.341016
ybbP	-0.31773	0.342495
yegD	-0.346034	0.343007
ypdC	-0.366521	0.343007
ypjB	-0.371326	0.343007
rcsD	0.370324	0.343298
yheO	0.421717	0.343298
flgK	-0.396324	0.343472
gntU	0.366066	0.343472
gadW	0.362162	0.344941
yicO	0.313932	0.344992
pflA	0.381247	0.345246
lpxA	0.359716	0.346532
pdxJ	-0.40968	0.346532
rnhA	0.367655	0.346532
yfaT	0.376843	0.346532
ygcB	-0.358329	0.346532
yoeE	-0.36911	0.346532
ftsB	-1.75552	0.346562
yhbU	0.397206	0.347121
nadC	-0.382299	0.347206
phnM	-0.380332	0.347206
ybgL	-0.353839	0.347206
yfhB	-0.373519	0.347288
yfjP	-0.399087	0.348125
yobA	0.321941	0.348125
fhiA	-0.367156	0.348771
yidP	0.311486	0.348987
yjbA	0.336014	0.350698
pmbA	0.364647	0.35102
seqA	-1.08151	0.351438
hslR	0.363641	0.352059
ycfL	-0.339897	0.35272
melA	0.364601	0.35287
ydjJ	0.361309	0.35287
cspH	-0.323346	0.353164
yjbD	0.353745	0.354332
yeiE	0.359463	0.355429
yfaX	0.359265	0.355429
cvpA	0.359016	0.355959
yfbB	0.36086	0.35681
iadA	0.362981	0.357758
aaeR	0.354323	0.358503
glcD	0.361906	0.358503
srlA	-0.606008	0.358503
rpiB	0.323372	0.358749
lhr	0.390053	0.359467
truD	-0.357102	0.360713
yebY	0.31084	0.361045
fieF	0.35978	0.361942
ygcP	-0.36023	0.361999
yhbT	0.36331	0.362416
ugpA	0.357591	0.362741
livG	0.347965	0.364186
rof	-0.359034	0.364194
ydiR	0.373982	0.364373
napC	0.38956	0.367753
ydgK	0.365404	0.367951
yfjK	-0.357475	0.368641
yjcH	0.340471	0.369192
tas	-0.320575	0.369444
aaeX	0.355094	0.370084
ascB	-0.351064	0.370763
nlpA	0.302721	0.370763
yafT	-0.355633	0.370763
yfeO	-0.306031	0.370763
yicI	0.301061	0.370763
yphB	-0.3874	0.370763
wcaD	-0.299718	0.370856
ybeX	0.531986	0.370856
speD	-0.354444	0.371503
ygcQ	-0.328891	0.371503
exuR	0.346719	0.372099
yjdA	0.350212	0.372099
cpdA	0.353349	0.373485
yfcX	0.353247	0.37464
yliK	0.362547	0.375577
yliJ	-0.34903	0.376023
yafE	-0.358787	0.37705
hisQ	0.385082	0.37726
ygdH	-0.338773	0.377324
tpiA	1.31055	0.37757
yccX	-0.42555	0.379125
yjhS	-0.351081	0.379345
gloA	-1.09707	0.381625
cysN	-0.34617	0.38272
pheA	-0.383465	0.38272
rsuA	-0.345671	0.38272
talA	-0.303301	0.38272
yaeH	-0.347845	0.38272
ydbH	0.29767	0.38272
ygfG	0.354872	0.384316
wbbK	-0.346941	0.384725
focA	0.343837	0.385242
ybhF	-0.424584	0.385888
htpG	-0.297832	0.38601
yajL	-0.328925	0.38601
ybjD	-0.351333	0.38601
yfcA	-0.343303	0.38601
qor	0.327026	0.386265
recC	-0.700652	0.387104
ygbM	-0.346786	0.387104
ade	0.294407	0.387242
malT	0.346229	0.387974
garR	0.343558	0.387974
yfjH	-0.341459	0.388219
ygaR	-0.344665	0.388793
yeiL	0.342451	0.389104
ypfI	-0.300688	0.389104
clpA	-0.340572	0.389579
hisD	-0.345104	0.389579
csgF	-0.339985	0.39129
degP	-0.525238	0.39129
cysD	-0.349373	0.393543
fliQ	-0.338694	0.393543
hisF	-0.342978	0.393543
yedM	-0.341866	0.393543
yfjL	-0.341994	0.393543
iscS	1.30265	0.395429
rhtA	-0.341743	0.395429
yciS	-0.341955	0.395429
metA	0.340929	0.397882
yafU	-0.341105	0.397889
serB	0.32469	0.398398
xylA	0.29427	0.398631
ybeL	-0.340489	0.398631
yjiL	-0.342671	0.398631
adhE	0.375426	0.39909
frsA	-0.332649	0.399419
yfbP	0.336668	0.40003
dinI	-0.343659	0.401049
hcr	-0.337934	0.401049
ydgD	0.337211	0.401049
flgN	-0.334727	0.401226
yfjI	-0.426386	0.401226
hyfH	-0.288358	0.402347
yeaW	0.288484	0.402512
dkgB	-0.384779	0.402559
ydjM	0.333982	0.402774
ldcA	-0.847381	0.405543
agaB	0.335402	0.406211
fucO	-0.286778	0.406211
queA	-0.28866	0.406211
hisJ	0.357955	0.406753
ycgX	-0.332595	0.408612
yfhM	-0.548251	0.408669
yicE	0.284521	0.408776
carA	0.331211	0.409265
yciK	0.326021	0.411082
iap	-0.335284	0.413451
sbcB	-0.318218	0.413451
yajQ	-0.282346	0.413687
ybhP	-0.343511	0.414154
ygbJ	-0.33014	0.414154
yicS	0.282353	0.414154
hisL	-0.330031	0.414691
ugpE	0.329438	0.414691
garD	0.332051	0.414919
pntA	0.349798	0.414919
cdaR	-0.328578	0.415183
pbpG	-0.328696	0.415183
yhcN	0.325288	0.415183
ydfP	0.29176	0.41525
mazG	-0.322184	0.416848
ccmG	0.404711	0.417835
ybjL	-0.326561	0.417835
ydiQ	0.36267	0.417835
yfeU	-0.294517	0.417835
yfjZ	-0.329021	0.418073
tktB	-0.304703	0.418761
rfbA	-0.35874	0.418792
yefM	-0.32667	0.418792
hemF	-0.321914	0.419031
nirC	0.707448	0.419031
pykA	-0.279383	0.419601
ydiA	0.328814	0.419601
manY	0.30737	0.419757
syd	-0.283038	0.419757
ycaC	0.324669	0.419757
pstA	0.977021	0.420994
yggG	0.348302	0.420994
ybjN	-0.324546	0.422081
pinH	-0.327278	0.422743
ybgE	0.320966	0.422743
yafD	-0.327404	0.423653
gutQ	-0.33761	0.42488
yicC	0.27324	0.425622
yceI	-0.34318	0.425663
arsR	0.289703	0.427702
garL	0.330694	0.427821
yodD	-0.327403	0.427821
ynbD	0.323359	0.428045
ibpB	0.275661	0.428873
yqjC	0.301809	0.428873
ytfG	0.322669	0.430544
hchA	-0.32354	0.431069
yahF	-0.297198	0.432224
yggX	0.322426	0.432876
fecD	-0.284812	0.433149
yiaL	0.274786	0.43514
cysH	-0.310646	0.435641
ygdR	-0.297128	0.439119
dsbC	-0.301498	0.440279
pncA	0.318337	0.440666
ygcJ	-0.319831	0.440666
yhbH	0.313865	0.440666
yliG	-0.319872	0.440666
napB	0.315442	0.440766
gshB	0.315272	0.44105
yegK	-0.325876	0.44105
alsB	0.279995	0.441724
rfaZ	-0.316047	0.441724
yjhI	0.287844	0.441724
gltJ	-0.31621	0.442666
yiaO	0.269948	0.442962
fliM	-0.355341	0.443013
glcC	0.314538	0.443013
grxA	-0.323003	0.443013
purF	-0.321888	0.443013
yaeB	-0.318011	0.443013
ybdZ	-0.275637	0.443013
dinD	0.267449	0.443809
yqgE	0.32433	0.443809
bioC	-0.337827	0.444052
menE	0.332059	0.444909
uhpT	0.267044	0.445378
potC	-0.314933	0.445412
cbl	-0.316116	0.445638
csiR	-0.33739	0.445638
fliO	-0.322306	0.445638
envC	-0.315451	0.44681
trpL	0.314005	0.44681
xylH	0.293593	0.44681
yraH	0.313521	0.447218
gltL	-0.337892	0.448357
panE	-0.276206	0.44872
atoC	0.332894	0.449408
yigE	0.414487	0.449787
clcA	-0.319275	0.449987
holD	-1.3181	0.449987
lysC	0.313207	0.449987
ybgI	-0.310731	0.449987
ycfP	-0.320495	0.449987
yicL	0.267354	0.449987
epd	0.318211	0.45057
lyxK	0.268437	0.45057
eco	0.310329	0.450579
yqjD	0.308898	0.451127
recT	0.306313	0.451454
luxS	-0.321359	0.451746
yfcP	-0.314025	0.45318
gabT	-0.272138	0.453944
nikE	0.31123	0.454586
cysG	0.356993	0.456833
yhhA	0.310383	0.456833
gidB	0.446602	0.45771
galM	-0.417495	0.458121
cpdB	0.30891	0.460763
yfjT	-0.32568	0.461126
actP	0.282441	0.461906
recB	-0.732037	0.462529
dinG	-0.39479	0.463219
mngB	-0.330617	0.463219
nrfC	0.270833	0.463219
ybiR	-0.306953	0.463219
ydhA	0.311356	0.463219
ypjF	-0.306945	0.463219
malY	0.32106	0.46384
prmB	-0.3124	0.46384
ytjC	-0.315796	0.46384
gshA	0.302349	0.465479
hycE	-0.304179	0.465479
yfjU	-0.306259	0.465479
yheU	0.316323	0.465479
frlB	0.348735	0.465691
pyrC	-0.304711	0.465691
elaD	0.318041	0.465937
yceJ	-0.340095	0.465937
chpR	-0.303025	0.466843
manX	0.296095	0.466843
kdpA	-0.355174	0.468022
yhaV	0.304986	0.468022
phnB	0.260534	0.471638
potA	-0.303106	0.471714
yegR	-0.269887	0.471714
yfiA	0.299006	0.472347
mdtG	-0.299284	0.474032
yniB	0.302339	0.477299
mtlA	0.262637	0.477631
miaB	-0.312909	0.47943
yiaH	-0.299439	0.4823
rrmA	0.285127	0.484431
ymfO	0.302095	0.485429
ybiU	-0.297203	0.485872
ybgJ	-0.295895	0.48603
ysdC	0.295229	0.48603
dgoT	0.252018	0.486969
narU	0.293949	0.48808
ygeX	0.276387	0.48808
menA	0.293997	0.489278
yadI	-0.309486	0.490676
zwf	-0.414429	0.490676
purH	0.294152	0.491318
yceF	-0.436787	0.491491
yfdT	-4.32368	0.491615
kduD	-0.284583	0.491766
yeeW	-0.284072	0.491766
artJ	-0.291322	0.492094
fimF	-0.294699	0.492094
sgcQ	-0.285706	0.492094
ygcF	-0.260863	0.492351
yaeP	-0.287774	0.492398
yoaA	0.251374	0.492398
hydN	-0.295493	0.493223
chbC	0.291048	0.493716
ygaP	-0.293841	0.493716
yebS	-0.245781	0.49454
yafJ	-0.33074	0.494542
ymfN	0.312461	0.494542
yfaU	0.317652	0.495422
dgt	-0.295762	0.495988
flu	-0.29026	0.495988
ygbF	-0.292091	0.496032
pfkB	0.292239	0.496885
potI	-0.307211	0.496885
bioD	-0.365438	0.497071
flgH	-0.289336	0.497071
yehB	0.291432	0.497071
acpT	-0.29139	0.497806
fnr	0.288765	0.497806
ygdQ	-0.256853	0.499043
ypdG	-0.290822	0.499202
livH	0.290666	0.49931
yaeI	-0.287606	0.49931
basR	0.287809	0.49946
yhaK	0.331676	0.49946
hypE	-0.287621	0.500515
yqjE	0.293452	0.50205
yahD	-0.247489	0.502091
ytfT	0.286926	0.50396
wcaE	-0.278894	0.504498
agaS	0.295354	0.504819
yfgC	-0.329177	0.506502
yfhK	-0.286682	0.507641
argG	0.284216	0.507972
soxR	0.250146	0.509461
ybjS	-0.282724	0.509461
deoA	-0.318623	0.511139
galK	-0.336459	0.511139
yddW	-0.265532	0.511139
fiu	-0.63658	0.512911
sbmC	-0.274243	0.513735
setB	0.364897	0.513735
yrbE	0.278865	0.514169
rnk	-0.280945	0.514243
amiA	-0.257352	0.514666
hcaD	-0.280557	0.515633
agaW	0.282271	0.516681
hypD	-0.280856	0.516762
ydiM	0.285022	0.516762
ynaE	0.262527	0.518547
ego	0.280078	0.518602
galF	0.271621	0.518602
hycA	-0.278934	0.518602
rfaI	0.236865	0.518602
yfcS	0.279979	0.518602
ymgG	-0.280878	0.521033
trxA	0.775993	0.521157
yqgC	0.281073	0.52139
ydhL	0.295205	0.521779
gatC	-0.277109	0.522966
hrpB	0.318483	0.522966
nlpB	-0.274687	0.522966
ybhS	-0.277594	0.522966
yciI	0.28003	0.522966
yedL	-0.277973	0.522966
trpC	0.27772	0.523018
yfjX	-0.277226	0.524118
phnJ	0.275985	0.524404
glnD	-0.27565	0.525272
rnhB	-0.294952	0.525485
sufB	0.277998	0.525485
rsgA	4.18479	0.525661
shiA	-0.278235	0.526499
rffA	0.293487	0.528934
tdcC	0.275635	0.528934
creB	0.277181	0.529394
nikC	0.273306	0.530137
erfK	-0.276156	0.531614
ligB	0.236581	0.531614
ybeA	-0.285575	0.531614
sapB	0.270643	0.533007
paaG	0.246485	0.533012
ydjQ	0.272457	0.533085
alsE	0.239659	0.533639
apaH	0.270277	0.533639
priA	-0.275193	0.533639
yhaJ	0.272787	0.533639
caiC	0.273754	0.53388
pitB	0.256489	0.53388
ydhT	0.271672	0.53388
yfcE	0.284945	0.53388
torT	-0.333831	0.534333
uxaC	0.248489	0.534333
fhuC	-0.274172	0.534675
ybhK	-0.300572	0.535491
yfeA	-0.236127	0.535491
cpxR	0.272323	0.535598
yggF	0.272067	0.535598
manA	-0.246173	0.536782
dnaJ	0.414086	0.536793
ybhJ	-0.428412	0.537869
yccZ	-0.293254	0.537869
yegE	-0.266244	0.537869
yeeS	-0.263681	0.539647
yfdI	-0.313307	0.539647
ykgK	-0.269055	0.539647
astC	0.268248	0.540756
sufC	0.267962	0.540756
ygbK	-0.27104	0.541135
ynfL	0.262579	0.541232
yidJ	0.232302	0.542826
btuE	0.283095	0.542844
csdA	0.266164	0.542844
hycB	-0.267298	0.542844
nuoG	0.268006	0.542844
yoaG	0.226257	0.542844
alkA	-0.269222	0.5431
grxC	0.268937	0.5431
nrfD	0.240879	0.5431
phoH	-0.266802	0.5431
yddA	0.262164	0.5431
yfhH	-0.267793	0.5431
yggE	0.267985	0.5431
yicN	0.22805	0.5431
yidF	0.226084	0.5431
glvG	0.227377	0.543207
yeaQ	0.229451	0.543207
ebgR	0.248387	0.543781
gatD	-0.253115	0.543781
uvrB	-0.274642	0.543781
ybiV	-0.265101	0.543781
ycfT	0.268114	0.543781
yggV	0.266869	0.543781
yjcB	0.270957	0.543781
yeeU	-0.266064	0.544506
sra	-0.234427	0.544635
ydhZ	0.267317	0.544635
ygcN	-0.236222	0.544635
ygcO	-0.262307	0.545372
yqiK	-0.26498	0.546419
maoC	0.255349	0.547044
mlrA	-0.272963	0.547044
rsmB	-0.26491	0.547044
yaeF	-0.262942	0.547044
ydhJ	0.278703	0.547044
yjbJ	0.240735	0.547044
glgP	0.284288	0.548002
hycH	-0.300718	0.548002
ogrK	-0.238799	0.54811
djlA	-0.231294	0.548987
gltK	-0.262231	0.549833
xapR	-0.27263	0.549833
yecC	-0.281057	0.549833
yggT	0.261685	0.549833
adhP	-0.25063	0.55099
mdtD	-0.263051	0.5513
wbbJ	-0.262824	0.5513
yacF	0.293693	0.551451
rihB	0.288488	0.551626
srlB	-0.263364	0.551626
yjiA	0.261123	0.551626
fruA	0.227674	0.551671
ycdK	-0.409042	0.551671
yphG	-0.260217	0.551671
fumA	0.272466	0.551745
yhhJ	0.230676	0.551745
ada	0.262048	0.55226
csgB	-0.281777	0.55226
dgoD	0.272121	0.55226
gcvR	-0.220123	0.55226
kdpF	-0.270911	0.55226
nusB	-0.642888	0.55226
recN	-0.267439	0.55226
xapB	-0.254777	0.55226
yadE	-0.267143	0.55226
ybgS	-0.290732	0.55226
ybhB	-0.357082	0.55226
yeaD	0.261253	0.55226
yfgH	-0.272714	0.55226
ygdB	0.234594	0.55226
yggC	0.258654	0.55226
yhjK	-0.259754	0.55226
yliI	-0.265172	0.55226
yqcC	-0.263249	0.55226
sufE	0.260712	0.553243
hokC	0.260836	0.553372
maeB	-0.259559	0.553372
ypdD	-0.251373	0.553372
yhhN	0.258463	0.55352
dedD	-1.46183	0.55376
fdnI	-0.26216	0.55376
trpA	0.258635	0.55376
yagG	-0.366667	0.55376
ydhY	0.259707	0.55376
yecO	-0.225461	0.55376
yfdX	-0.258535	0.55376
yfeN	-0.258429	0.55376
yhiJ	0.248867	0.55376
yncD	-0.259787	0.55376
napF	0.310352	0.553879
ymfB	0.259514	0.553879
fucU	-0.227489	0.554547
alkB	0.255477	0.556534
potF	-0.291606	0.556534
lrp	-0.274624	0.556686
ugpQ	0.231979	0.556686
yadD	-0.25499	0.558321
yfiQ	0.255418	0.558321
srlR	-0.258572	0.559244
yfjD	-0.363759	0.559244
yeaV	0.239542	0.559897
yfiP	-0.262289	0.559897
kbaY	0.255785	0.560946
aroD	-0.354738	0.561247
galT	-0.255037	0.561247
livJ	0.255497	0.561247
puuB	0.255009	0.561247
pepA	0.245679	0.561961
yehW	-0.263533	0.561961
yfjR	-0.359318	0.561961
yecI	-0.255221	0.562154
yccM	-0.293448	0.563768
ygcS	-0.235214	0.563768
acrA	0.218649	0.563814
fimA	0.254696	0.563814
rumB	-0.2553	0.564117
yrhA	0.254104	0.564117
hybG	0.263172	0.564205
yegS	-0.23305	0.564205
yjgN	-0.226868	0.564205
idnT	0.253772	0.564899
yfhQ	0.267605	0.564899
yhhW	0.253797	0.564899
dhaL	0.252736	0.566557
cspE	0.250015	0.566666
yjiM	-0.266644	0.566666
atoS	0.265637	0.566738
ybeB	-0.266619	0.568184
ybiB	-0.299664	0.569136
pnuC	-0.285791	0.569344
ybeF	-0.24853	0.569344
eutH	-0.235081	0.570764
ppx	0.253995	0.570764
ycdL	-0.281211	0.570764
ydcX	-0.248083	0.570764
yadL	-0.262651	0.571429
yahE	-0.223575	0.571429
ydaF	0.250574	0.571429
bioB	-0.351597	0.571776
appB	-0.373685	0.571919
cchA	-0.221916	0.57238
yfjV	-0.247596	0.57238
pcnB	-0.467411	0.57359
ruvC	-0.246722	0.57359
yjcR	0.248985	0.57359
ydiU	0.269753	0.573763
mcrC	-0.247133	0.574963
yqeA	-0.21425	0.576448
cheR	0.20931	0.57657
hypA	-0.256071	0.57703
yeaY	0.209449	0.57703
htpX	0.209339	0.578778
ymfL	0.340967	0.581335
fbp	-0.280218	0.581554
mdh	-0.328328	0.581554
ycaP	0.241594	0.581554
argA	-0.206014	0.582722
ydhX	0.245499	0.582962
pgi	-0.208253	0.584377
ydcA	-0.244751	0.584377
yfjJ	-0.250951	0.584377
yfhD	-0.245661	0.585717
rob	0.243965	0.588245
ompR	-0.563539	0.588364
ccmH	0.240634	0.588711
pqiB	0.286093	0.588711
yebQ	0.208444	0.588711
yfhA	-0.22974	0.58946
cfa	0.249379	0.589648
ymfM	0.259089	0.589648
yfcZ	-0.239976	0.590841
glcG	0.241895	0.591027
kch	-0.242021	0.591064
ahpF	-0.239003	0.591151
pqiA	0.309169	0.592747
ycaJ	0.235903	0.592747
ymfC	0.241475	0.592747
prlC	0.220056	0.592965
aqpZ	-0.245902	0.593342
ycjW	0.227432	0.593342
yibH	0.205192	0.593342
ymgA	0.239101	0.593342
wcaK	-0.239692	0.593446
ycbW	-0.414446	0.593716
ydbD	-0.237563	0.593716
ydfR	0.208257	0.593716
yfbK	0.237337	0.594023
ypjM	-0.239493	0.594244
stfE	0.237246	0.594734
ydbC	-0.252814	0.594734
ydiI	0.30159	0.595148
ygcU	-0.254297	0.595299
yhaL	0.245427	0.595411
nlpC	0.26832	0.595729
yeiW	0.236531	0.595729
ycbX	-0.271118	0.595944
narJ	0.235866	0.596139
ycjY	-0.235973	0.596139
dps	-0.383484	0.597751
yjbB	0.233843	0.600624
glpA	0.260283	0.601746
narK	0.2369	0.601746
osmY	0.235226	0.601746
yhiQ	0.236171	0.603089
acrB	0.209442	0.604012
dadX	-0.240203	0.604012
yhhX	0.2334	0.60408
yhaB	0.232703	0.604271
ygeK	0.201279	0.604411
hepA	0.216428	0.604894
yfhR	-0.23351	0.605326
yobD	0.216964	0.605326
ybgQ	-0.259064	0.60536
ydeO	-0.214364	0.60536
kptA	-0.231587	0.607412
citE	-0.244646	0.607787
gatZ	-0.214056	0.607787
gspC	0.336083	0.607787
hscB	0.240095	0.607787
thrA	0.233319	0.607787
yehL	0.240207	0.607787
[truncated: 1,546 more rows]

## Sheet: poor-rich - log2 and pval
Gene name	log2FoldChange	FDR adj pval
sspA	4.88564	6.90022e-169
gcvR	2.86241	3.19681e-133
pgi	3.37074	4.56202e-128
metN	2.5408	3.64941e-120
ysaB	1.76333	9.89075e-118
rfaC	2.3221	2.77843e-113
pabB	2.89276	1.73285e-112
yebR	-3.25613	7.92976e-96
rfaD	2.45622	5.01249e-89
panD	6.07966	6.11141e-86
kbl	1.95197	1.28266e-84
rfaQ	1.62793	4.26543e-81
phoR	2.05578	3.14426e-77
panE	7.13687	6.25129e-74
serB	4.36381	5.6566e-72
fepG	6.73689	2.46174e-67
thiS	4.57245	2.90275e-67
hflD	4.02981	3.06687e-66
cysH	6.65794	1.73703e-65
emrD	2.06432	4.39787e-64
yhhK	5.60666	6.34811e-64
aroA	6.34659	1.96755e-60
aroC	6.4645	6.04241e-60
trpD	4.76592	2.26937e-57
metI	1.88083	5.74454e-57
speD	3.33643	1.33452e-56
rpoZ	1.42553	1.0088e-54
nuoH	-2.03058	1.72866e-54
cysC	4.25763	6.07928e-54
thiI	7.00408	3.62329e-53
gor	-2.37947	4.96997e-52
mrcB	2.89454	4.78077e-47
nuoA	-1.75993	3.49042e-46
tdh	1.48856	5.31206e-46
sapC	1.99724	1.44276e-45
rfaF	1.34339	1.66904e-44
rfaG	1.1346	1.67992e-43
thiG	3.74433	8.98348e-43
ubiD	2.19045	2.14574e-42
nuoN	-2.05027	5.33037e-42
nadB	6.59025	7.79658e-42
lipB	3.16869	2.96981e-41
prfC	2.83508	2.18374e-40
thiH	3.49744	2.76678e-39
ldcA	-3.33675	4.26346e-39
serA	4.23453	4.9563e-39
pfkA	2.67098	1.50856e-38
sodA	3.26729	1.55261e-38
aroB	6.2385	2.20777e-36
pabA	3.05235	3.41475e-36
ybbS	1.05209	5.96846e-35
nagA	-1.70648	7.2918e-33
nuoJ	-1.89991	8.6212e-33
sdhC	-1.30915	2.11931e-32
ptsI	5.99978	2.35492e-32
ydfA	-1.87888	4.8867e-32
sapD	1.83609	2.53694e-31
ptsN	1.61566	7.89244e-31
pykF	-1.40892	1.06026e-30
bioA	5.08883	1.21785e-30
nuoG	-1.46824	4.491e-30
yahM	1.22744	6.42237e-30
thiE	7.78776	1.61524e-29
yahO	1.08026	1.27131e-28
thiF	6.72207	1.49842e-28
nadC	6.36083	2.98315e-28
ftsX	2.94943	3.07737e-28
glpG	1.15837	4.03526e-28
tonB	2.78229	4.43672e-28
ylbG	1.03685	4.74804e-28
gph	1.473	4.75342e-28
bioC	5.87451	6.00838e-28
trpC	6.66734	6.61378e-28
purN	4.40172	1.22235e-27
aspA	-1.59975	2.70644e-27
atpG	1.73538	2.70644e-27
crr	1.63192	3.92051e-27
yidL	1.038	4.14583e-27
cysI	2.34319	7.91328e-27
glnG	3.0684	2.69998e-26
bioF	5.28733	4.08877e-26
nuoC	-1.91736	5.15734e-26
nuoE	-1.72934	5.58658e-26
cysK	6.86519	8.83293e-26
exbD	2.0508	6.01324e-25
panC	6.29747	2.70359e-24
priA	2.43492	3.49834e-24
prc	1.44762	4.39345e-24
bioH	6.2848	5.53803e-24
atpC	1.61359	5.67793e-24
glnD	7.8216	6.89937e-24
lrp	3.06957	8.10722e-24
dedD	-4.04633	1.25345e-23
prpB	1.04511	1.35828e-23
sapB	1.81568	1.54543e-23
cysB	8.76762	2.15692e-23
dgkA	1.95929	2.17597e-23
apt	1.08084	4.93836e-23
rfaI	0.885704	8.04305e-23
nuoB	-1.64946	1.00903e-22
dsbB	1.89213	1.61746e-22
cysJ	2.32851	2.26634e-22
eda	1.50537	1.03721e-21
gshB	-1.37296	1.37509e-21
yqeG	0.932642	1.4531e-21
rfaE	1.40469	2.48886e-21
phoB	0.632493	3.25492e-21
ylbH	0.920046	3.59032e-21
ycaR	2.49234	5.29248e-21
trkA	1.94344	1.19456e-20
uhpT	0.987881	1.37082e-20
prpE	0.907888	1.44572e-20
aceF	4.26018	1.60055e-20
tdcB	4.27442	1.69878e-20
cueR	0.868573	2.28839e-20
pgm	1.85202	4.65024e-20
secB	1.59369	9.24587e-20
ptsG	1.73699	2.42701e-19
aroL	1.04701	2.44863e-19
bioD	5.30877	3.33491e-19
pheP	0.853601	3.60215e-19
ybbA	0.822551	4.61679e-19
dps	-2.06175	6.12636e-19
ppc	1.91973	8.79991e-19
pabC	1.8361	1.0932e-18
rfaL	1.00486	1.69054e-18
yidQ	0.940188	4.63121e-18
yidG	0.962494	7.3173e-18
yoaE	-1.19398	7.47918e-18
ybbB	0.907421	8.76102e-18
envC	1.59057	1.06119e-17
lpcA	1.79691	1.20689e-17
yahJ	1.14749	1.92739e-17
dsdA	1.67517	2.1958e-17
ybbL	0.783212	2.1958e-17
yidF	0.856252	2.32717e-17
purE	12.809	2.36179e-17
sdhD	-0.936153	2.98298e-17
ftsN	2.48451	5.80139e-17
yhiP	0.876909	5.94274e-17
purC	12.5964	8.87897e-17
cysN	1.64459	9.18426e-17
dinD	0.866143	1.05891e-16
glpC	-1.32821	1.21037e-16
mntH	-1.40816	1.25708e-16
purK	12.5197	1.39042e-16
ybbD	0.838325	1.41677e-16
yoaA	-0.780584	1.63484e-16
ybbC	0.892311	1.70611e-16
ibpB	0.948634	1.88101e-16
yfbG	-1.27474	2.13312e-16
entD	1.08461	2.20156e-16
pyrF	12.4391	2.20156e-16
relA	2.26343	2.2349e-16
sapF	2.07968	2.25429e-16
yicH	0.798999	2.67897e-16
exbB	1.68142	3.05433e-16
ypaA	-1.25894	1.11066e-15
hdfR	1.81748	1.38217e-15
yidR	0.893462	1.65031e-15
prpR	1.09157	1.89339e-15
yqiC	1.66316	1.89339e-15
yahC	0.819249	2.12833e-15
yiaY	0.805588	2.26276e-15
rcsD	-1.26875	2.2765e-15
yibK	0.840934	2.45776e-15
ppiB	0.979278	2.61544e-15
uhpC	0.931397	2.83873e-15
allA	0.777956	4.64087e-15
ybbN	0.940883	5.02812e-15
pyrC	11.8941	5.48835e-15
uhpA	0.881316	5.77384e-15
purD	11.8784	5.95799e-15
cysG	3.06144	8.10963e-15
carB	11.8146	8.6085e-15
yiaV	0.89935	1.10642e-14
rfaS	0.864567	1.32614e-14
yicC	0.733987	1.3846e-14
ybbV	0.689299	1.39845e-14
fadR	1.18617	1.41853e-14
yidE	0.76401	2.02248e-14
manY	-0.865619	2.23128e-14
ybbK	0.783021	2.3491e-14
pitA	1.10212	2.39822e-14
hupB	0.897128	2.61079e-14
cyaA	2.18442	2.65687e-14
panB	11.6073	2.71487e-14
ybbM	0.925425	2.71487e-14
purL	11.5954	2.89157e-14
tolQ	1.46906	2.89157e-14
wcaF	-0.804797	2.94881e-14
ccmF	-1.22087	3.67207e-14
ybaT	0.77949	3.67207e-14
rdgC	0.74946	3.79771e-14
fepE	0.704503	3.85244e-14
rnhA	1.87148	4.21942e-14
tesA	0.790521	4.53861e-14
trxB	-3.31216	4.98512e-14
glxR	0.90179	5.21019e-14
entA	0.830559	5.76851e-14
rfaY	1.07003	6.15437e-14
clpX	1.09816	7.30371e-14
pyrB	11.4238	7.30371e-14
ligB	0.924349	7.44564e-14
pdxA	11.4148	7.6147e-14
ybdL	0.698782	1.00972e-13
gltA	-1.49144	1.02789e-13
epd	1.98579	1.12233e-13
yahK	0.703365	1.22476e-13
yoaD	-0.741886	1.26042e-13
purA	11.3048	1.39509e-13
yidH	0.907319	1.54593e-13
tolA	1.7539	1.54662e-13
trpA	11.2638	1.74014e-13
prmB	1.72694	1.97451e-13
purH	11.2318	2.06405e-13
trpE	11.2321	2.06405e-13
inaA	-1.31771	2.1604e-13
yfaD	-1.27181	2.31975e-13
yicR	1.19174	2.31975e-13
glvG	0.775819	2.47534e-13
yfaX	-1.1018	2.83716e-13
clpP	1.61142	2.92438e-13
yidP	0.830477	3.37451e-13
aroD	6.15681	3.52364e-13
purR	-0.843559	3.9016e-13
carA	11.0731	4.89472e-13
metF	-1.81122	6.72043e-13
pspA	0.970466	8.02925e-13
tesB	0.767335	8.35074e-13
proC	-0.911428	8.85136e-13
purF	10.9621	9.00668e-13
mutM	0.794544	1.16366e-12
yhcB	-2.87644	1.32819e-12
pyrD	10.8911	1.33075e-12
thiD	10.4626	1.33734e-12
cstA	0.713061	1.41327e-12
ydfB	-1.04248	1.53456e-12
trpB	10.8429	1.71921e-12
yeiL	-1.12458	1.79043e-12
ompA	2.84821	2.01513e-12
dcd	1.14734	2.36495e-12
ygfA	-3.23382	3.11873e-12
ilvN	0.713286	3.25993e-12
purM	10.7027	3.69569e-12
cusC	0.858356	3.91097e-12
yfaW	-1.12629	4.19108e-12
gpmA	-3.21615	4.37541e-12
yrbE	1.18421	4.39214e-12
speG	-0.748245	5.14987e-12
atoE	-1.25361	5.24898e-12
yhjY	0.805695	5.24898e-12
yibQ	0.758733	5.78742e-12
fur	-2.87486	6.26017e-12
atoC	-1.27882	6.55818e-12
yfbJ	-1.1029	6.75462e-12
yeaS	-0.692153	6.95754e-12
ubiG	-1.18622	6.98272e-12
yibD	0.728943	7.35499e-12
gltS	0.70448	7.5477e-12
cysD	1.57964	7.96991e-12
yejH	-1.1806	8.69772e-12
yeaW	-0.662491	9.38451e-12
entE	0.751402	9.82028e-12
cpxA	1.45718	1.0896e-11
dgoT	0.740551	1.18202e-11
atoD	-1.252	1.4589e-11
pdxJ	10.4418	1.4589e-11
prpC	0.798422	1.55559e-11
setC	0.749395	1.78128e-11
ushA	0.685409	1.90815e-11
fepA	0.802414	2.08552e-11
fldB	0.728949	2.25032e-11
mtlD	0.690078	2.2707e-11
sgbH	0.697535	2.28584e-11
rfaJ	0.758287	2.29189e-11
guaB	10.3538	2.29587e-11
ccmD	-1.33643	2.99812e-11
spr	-1.41758	2.99812e-11
selB	0.884248	3.13585e-11
cynS	0.692178	3.44626e-11
glpE	0.718986	3.54868e-11
yfbF	-1.03186	3.54868e-11
yeaY	-0.565515	4.17747e-11
glnE	1.12619	4.5877e-11
yoaG	-0.519721	4.63012e-11
hokE	0.760648	4.80753e-11
nfo	-1.13915	4.87067e-11
ybcY	0.606378	5.26348e-11
[truncated: 3,260 more rows]
