# Supplementary material for: Evolved bacterial resistance against fluoropyrimidines can lower chemotherapy impact in the Caenorhabditis elegans host
Source: eLife. 2020 Nov 30;9:e59831. doi: 10.7554/eLife.59831 (PMC7725501; doi:10.7554/eLife.59831)
Supplement: Supplementary file 2. [file elife-59831-supp2.xlsx]

## Sheet: poor-5FU - Enrichment
Geneset name	Database name	FDR adj pval	set.size
eco00540 Lipopolysaccharide biosynthesis	KEGG	0.000530501	26
eco00230 Purine metabolism	KEGG	0.0545413	56
eco02024 Quorum sensing	KEGG	0.0587024	48
eco03018 RNA degradation	KEGG	0.0587024	11
eco01110 Biosynthesis of secondary metabolites	KEGG	0.0587024	237
eco01130 Biosynthesis of antibiotics	KEGG	0.0587024	147
eco00400 Phenylalanine, tyrosine and tryptophan biosynthesis	KEGG	0.0587024	16
eco01120 Microbial metabolism in diverse environments	KEGG	0.0587024	210
eco00040 Pentose and glucuronate interconversions	KEGG	0.0587024	29
eco01200 Carbon metabolism	KEGG	0.0587024	85
LPSSYN-PWY superpathway of lipopolysaccharide biosynthesis	EcoCyc	0.0283222	13
SULFATE-CYS-PWY superpathway of sulfate assimilation and cysteine biosynthesis	EcoCyc	0.0283222	12
ALL-CHORISMATE-PWY superpathway of chorismate metabolism	EcoCyc	0.0283222	41
COMPLETE-ARO-PWY superpathway of aromatic amino acid biosynthesis	EcoCyc	0.0757279	16
GO:0044272 sulfur compound biosynthetic process	GO	2.82593e-05	28
GO:0009244 lipopolysaccharide core region biosynthetic process	GO	2.82593e-05	22
GO:0046401 lipopolysaccharide core region metabolic process	GO	2.82593e-05	22
GO:0072330 monocarboxylic acid biosynthetic process	GO	0.00144252	35
GO:0009311 oligosaccharide metabolic process	GO	0.00245294	38
GO:0043603 cellular amide metabolic process	GO	0.00245294	96
GO:0042364 water-soluble vitamin biosynthetic process	GO	0.00245294	29
GO:0042398 cellular modified amino acid biosynthetic process	GO	0.00245294	14
GO:0043604 amide biosynthetic process	GO	0.00245294	66
GO:0009312 oligosaccharide biosynthetic process	GO	0.00245294	28
GO:0009110 vitamin biosynthetic process	GO	0.00245294	30
GO:0006790 sulfur compound metabolic process	GO	0.00245294	74
GO:0051186 cofactor metabolic process	GO	0.00753623	144
GO:1901566 organonitrogen compound biosynthetic process	GO	0.0109208	246
GO:0009108 coenzyme biosynthetic process	GO	0.0123219	68
GO:0009314 response to radiation	GO	0.0138061	75
GO:0009103 lipopolysaccharide biosynthetic process	GO	0.0152882	32
GO:0044271 cellular nitrogen compound biosynthetic process	GO	0.0153361	413
GO:0005975 carbohydrate metabolic process	GO	0.0172714	199
GO:0016053 organic acid biosynthetic process	GO	0.0182345	123
GO:0046394 carboxylic acid biosynthetic process	GO	0.0182345	123
GO:0006767 water-soluble vitamin metabolic process	GO	0.0255518	39
GO:0010165 response to X-ray	GO	0.0255518	12
GO:0008653 lipopolysaccharide metabolic process	GO	0.0275457	34
GO:0009056 catabolic process	GO	0.0276803	353
GO:0006766 vitamin metabolic process	GO	0.0277107	40
GO:0051188 cofactor biosynthetic process	GO	0.0286395	94
GO:0017144 drug metabolic process	GO	0.0286395	143
GO:0019752 carboxylic acid metabolic process	GO	0.0459114	307
GO:0006575 cellular modified amino acid metabolic process	GO	0.0459114	31
GO:0006082 organic acid metabolic process	GO	0.0462124	325
GO:1901575 organic substance catabolic process	GO	0.0462124	342
GO:0006732 coenzyme metabolic process	GO	0.0462124	102
GO:0044283 small molecule biosynthetic process	GO	0.0462124	187
GO:0032787 monocarboxylic acid metabolic process	GO	0.0462124	143
GO:0019321 pentose metabolic process	GO	0.0480534	20
GO:0045184 establishment of protein localization	GO	0.0513439	20
GO:0006073 cellular glucan metabolic process	GO	0.0513439	14
GO:0009628 response to abiotic stimulus	GO	0.0513439	201
GO:0043436 oxoacid metabolic process	GO	0.0521453	314
GO:1903509 liposaccharide metabolic process	GO	0.0527246	37
GO:0009066 aspartate family amino acid metabolic process	GO	0.0596772	36
GO:0008104 protein localization	GO	0.0679566	21
GO:0010467 gene expression	GO	0.0679566	394
GO:0051604 protein maturation	GO	0.0679566	35
GO:0005996 monosaccharide metabolic process	GO	0.0788166	66
GO:0006743 ubiquinone metabolic process	GO	0.083084	10
GO:0006744 ubiquinone biosynthetic process	GO	0.083084	10
GO:0015851 nucleobase transport	GO	0.0857562	11
GO:0044248 cellular catabolic process	GO	0.0857562	280
GO:0044262 cellular carbohydrate metabolic process	GO	0.0857562	119
GO:1901362 organic cyclic compound biosynthetic process	GO	0.0857562	394
GO:0042255 ribosome assembly	GO	0.0871366	15
GO:0006401 RNA catabolic process	GO	0.0905708	22
GO:0016052 carbohydrate catabolic process	GO	0.0911559	101
GO:0000271 polysaccharide biosynthetic process	GO	0.0983294	63
GO:0044042 glucan metabolic process	GO	0.0989896	15

## Sheet: poor-5FU - Depletion
Geneset name	Database name	FDR adj pval	set.size
eco02040 Flagellar assembly	KEGG	1.98569e-12	32
eco00520 Amino sugar and nucleotide sugar metabolism	KEGG	0.0282369	39
eco04122 Sulfur relay system	KEGG	0.0282369	17
eco02030 Bacterial chemotaxis	KEGG	0.0347535	18
eco00290 Valine, leucine and isoleucine biosynthesis	KEGG	0.074451	14
eco02010 ABC transporters	KEGG	0.074451	158
PWY0-1348 NADH to dimethyl sulfoxide electron transfer	EcoCyc	0.0680567	11
PRPP-PWY \superpathway of histidine"	EcoCyc	0.0680567	17
GO:0048870 cell motility	GO	0.0135176	44
GO:0051674 localization of cell	GO	0.0135176	44
GO:0001539 cilium or flagellum-dependent cell motility	GO	0.0135176	37
GO:0071973 bacterial-type flagellum-dependent cell motility	GO	0.0135176	37
GO:0097588 archaeal or bacterial-type flagellum-dependent cell motility	GO	0.0135176	37
GO:0040011 locomotion	GO	0.0327884	57
GO:0006928 movement of cell or subcellular component	GO	0.0482906	53
GO:0009242 colanic acid biosynthetic process	GO	0.0604027	11
GO:0046377 colanic acid metabolic process	GO	0.0604027	11

## Sheet: poor-FUDR - Enrichment
Geneset name	Database name	FDR adj pval	set.size
eco02024 Quorum sensing	KEGG	0.003895	48
eco00230 Purine metabolism	KEGG	0.003895	56
eco00540 Lipopolysaccharide biosynthesis	KEGG	0.0207074	26
eco00360 Phenylalanine metabolism	KEGG	0.067596	29
eco00400 Phenylalanine, tyrosine and tryptophan biosynthesis	KEGG	0.067596	16
eco01120 Microbial metabolism in diverse environments	KEGG	0.067596	210
eco00040 Pentose and glucuronate interconversions	KEGG	0.067596	29
eco01220 Degradation of aromatic compounds	KEGG	0.067596	17
eco03010 Ribosome	KEGG	0.0678299	11
COMPLETE-ARO-PWY superpathway of aromatic amino acid biosynthesis	EcoCyc	0.0970547	16
PWY-6071 superpathway of phenylethylamine degradation	EcoCyc	0.0970547	12
SALVADEHYPOX-PWY adenosine nucleotides degradation II	EcoCyc	0.0970547	12
ALL-CHORISMATE-PWY superpathway of chorismate metabolism	EcoCyc	0.0970547	41
THREOCAT-PWY superpathway of L-threonine metabolism	EcoCyc	0.0970547	19
PWY-7805 (aminomethyl)phosphonate degradation	EcoCyc	0.0970547	10
PWY0-321 phenylacetate degradation I (aerobic)	EcoCyc	0.0970547	10
PWY0-1321 nitrate reduction III (dissimilatory)	EcoCyc	0.0970547	10
FERMENTATION-PWY mixed acid fermentation	EcoCyc	0.0970547	27
PWY-6608 guanosine nucleotides degradation III	EcoCyc	0.0970547	11
GO:0044272 sulfur compound biosynthetic process	GO	0.00153218	27
GO:0009244 lipopolysaccharide core region biosynthetic process	GO	0.00153218	22
GO:0046401 lipopolysaccharide core region metabolic process	GO	0.00153218	22
GO:0043603 cellular amide metabolic process	GO	0.00853225	94
GO:0043604 amide biosynthetic process	GO	0.00967743	64
GO:0006790 sulfur compound metabolic process	GO	0.0267829	73
GO:0010165 response to X-ray	GO	0.0296793	11
GO:0043043 peptide biosynthetic process	GO	0.0402352	45
GO:0019184 nonribosomal peptide biosynthetic process	GO	0.0402352	10
GO:0072329 monocarboxylic acid catabolic process	GO	0.041521	78
GO:0016999 antibiotic metabolic process	GO	0.043416	46
GO:0009312 oligosaccharide biosynthetic process	GO	0.043416	28
GO:0009311 oligosaccharide metabolic process	GO	0.0518761	38
GO:0032787 monocarboxylic acid metabolic process	GO	0.0522993	139
GO:1901566 organonitrogen compound biosynthetic process	GO	0.0570304	243
GO:0006518 peptide metabolic process	GO	0.0570304	58
GO:0017144 drug metabolic process	GO	0.0658456	143
GO:0046395 carboxylic acid catabolic process	GO	0.0658456	128
GO:0009056 catabolic process	GO	0.067196	352
GO:0072330 monocarboxylic acid biosynthetic process	GO	0.0965002	32
GO:1901575 organic substance catabolic process	GO	0.0965002	341
GO:0044248 cellular catabolic process	GO	0.0996968	279

## Sheet: poor-FUDR - Depletion
Geneset name	Database name	FDR adj pval	set.size
eco02040 Flagellar assembly	KEGG	4.38972e-15	32
eco00520 Amino sugar and nucleotide sugar metabolism	KEGG	0.00296052	39
eco02030 Bacterial chemotaxis	KEGG	0.0845887	18
PWY0-1348 NADH to dimethyl sulfoxide electron transfer	EcoCyc	0.0803734	11
ECASYN-PWY enterobacterial common antigen biosynthesis	EcoCyc	0.0803734	10
GO:0001539 cilium or flagellum-dependent cell motility	GO	0.000141018	37
GO:0071973 bacterial-type flagellum-dependent cell motility	GO	0.000141018	37
GO:0097588 archaeal or bacterial-type flagellum-dependent cell motility	GO	0.000141018	37
GO:0048870 cell motility	GO	0.000551279	44
GO:0051674 localization of cell	GO	0.000551279	44
GO:0040011 locomotion	GO	0.00203697	57
GO:0071978 bacterial-type flagellum-dependent swarming motility	GO	0.00437415	12
GO:0006928 movement of cell or subcellular component	GO	0.00982282	53
GO:0051302 regulation of cell division	GO	0.0820918	12

## Sheet: rich-5FU - Enrichment
Geneset name	Database name	FDR adj pval	set.size
eco00053 Ascorbate and aldarate metabolism	KEGG	0.000970321	17
eco00540 Lipopolysaccharide biosynthesis	KEGG	0.00282478	26
eco02060 Phosphotransferase system (PTS)	KEGG	0.00982608	35
eco00290 Valine, leucine and isoleucine biosynthesis	KEGG	0.00982608	14
eco00270 Cysteine and methionine metabolism	KEGG	0.0197252	31
eco00040 Pentose and glucuronate interconversions	KEGG	0.04396	28
eco03010 Ribosome	KEGG	0.04396	11
eco01110 Biosynthesis of secondary metabolites	KEGG	0.04396	252
eco00230 Purine metabolism	KEGG	0.0552651	66
eco01210 2-Oxocarboxylic acid metabolism	KEGG	0.0870319	22
eco03070 Bacterial secretion system	KEGG	0.0922605	13
eco00190 Oxidative phosphorylation	KEGG	0.0922605	28
THREOCAT-PWY superpathway of L-threonine metabolism	EcoCyc	0.00359726	19
SULFATE-CYS-PWY superpathway of sulfate assimilation and cysteine biosynthesis	EcoCyc	0.00881679	14
BRANCHED-CHAIN-AA-SYN-PWY superpathway of branched chain amino acid biosynthesis	EcoCyc	0.00881679	14
ARG+POLYAMINE-SYN superpathway of arginine and polyamine biosynthesis	EcoCyc	0.00881679	19
LPSSYN-PWY superpathway of lipopolysaccharide biosynthesis	EcoCyc	0.00881679	13
FUC-RHAMCAT-PWY superpathway of fucose and rhamnose degradation	EcoCyc	0.00881679	10
ECASYN-PWY enterobacterial common antigen biosynthesis	EcoCyc	0.0251174	10
P4-PWY \superpathway of L-lysine"	EcoCyc	0.0329196	14
PWY-7892 tRNA-uridine 2-thiolation and selenation (bacteria)	EcoCyc	0.0494419	12
DENOVOPURINE2-PWY superpathway of purine nucleotides <i>de novo</i> biosynthesis II	EcoCyc	0.0542506	20
PWY-6608 guanosine nucleotides degradation III	EcoCyc	0.0669875	11
THISYN-PWY superpathway of thiamine diphosphate biosynthesis I	EcoCyc	0.0847513	11
PWY0-781 aspartate superpathway	EcoCyc	0.0847513	17
GO:0005975 carbohydrate metabolic process	GO	1.1687e-09	200
GO:0016052 carbohydrate catabolic process	GO	3.40662e-06	101
GO:0044262 cellular carbohydrate metabolic process	GO	5.50066e-06	119
GO:0005996 monosaccharide metabolic process	GO	5.99059e-06	67
GO:0008643 carbohydrate transport	GO	8.34364e-06	88
GO:0019321 pentose metabolic process	GO	3.60278e-05	20
GO:0044264 cellular polysaccharide metabolic process	GO	0.000271178	68
GO:0009244 lipopolysaccharide core region biosynthetic process	GO	0.000436911	22
GO:0046401 lipopolysaccharide core region metabolic process	GO	0.000436911	22
GO:0046365 monosaccharide catabolic process	GO	0.000669092	44
GO:0008653 lipopolysaccharide metabolic process	GO	0.000669092	34
GO:0009067 aspartate family amino acid biosynthetic process	GO	0.000741237	21
GO:0005976 polysaccharide metabolic process	GO	0.000858912	71
GO:0009066 aspartate family amino acid metabolic process	GO	0.000951953	37
GO:0033692 cellular polysaccharide biosynthetic process	GO	0.0011335	61
GO:0009103 lipopolysaccharide biosynthetic process	GO	0.0011413	32
GO:0034219 carbohydrate transmembrane transport	GO	0.00137463	51
GO:0055085 transmembrane transport	GO	0.00184664	235
GO:0006793 phosphorus metabolic process	GO	0.00190676	200
GO:0019323 pentose catabolic process	GO	0.00206914	13
GO:0006810 transport	GO	0.00209227	440
GO:0000271 polysaccharide biosynthetic process	GO	0.00235632	63
GO:0051234 establishment of localization	GO	0.00269725	443
GO:0006796 phosphate-containing compound metabolic process	GO	0.00284476	185
GO:0034637 cellular carbohydrate biosynthetic process	GO	0.00337034	64
GO:1903509 liposaccharide metabolic process	GO	0.00337034	37
GO:0006520 cellular amino acid metabolic process	GO	0.00352849	144
GO:0071702 organic substance transport	GO	0.00554244	310
GO:0009082 branched-chain amino acid biosynthetic process	GO	0.00703691	15
GO:0009081 branched-chain amino acid metabolic process	GO	0.00736994	19
GO:0044283 small molecule biosynthetic process	GO	0.0088058	204
GO:0034655 nucleobase-containing compound catabolic process	GO	0.00911856	58
GO:1901605 alpha-amino acid metabolic process	GO	0.00911856	126
GO:0019637 organophosphate metabolic process	GO	0.0105015	145
GO:1901566 organonitrogen compound biosynthetic process	GO	0.0107793	270
GO:0016051 carbohydrate biosynthetic process	GO	0.0107793	76
GO:0008652 cellular amino acid biosynthetic process	GO	0.0111977	89
GO:0034645 cellular macromolecule biosynthetic process	GO	0.0111977	381
GO:0044275 cellular carbohydrate catabolic process	GO	0.0111977	42
GO:0009401 phosphoenolpyruvate-dependent sugar phosphotransferase system	GO	0.011212	41
GO:1901607 alpha-amino acid biosynthetic process	GO	0.0115751	79
GO:0034220 ion transmembrane transport	GO	0.0121518	116
GO:0010467 gene expression	GO	0.0121518	391
GO:1901135 carbohydrate derivative metabolic process	GO	0.0132171	212
GO:0006743 ubiquinone metabolic process	GO	0.0132171	10
GO:0006744 ubiquinone biosynthetic process	GO	0.0132171	10
GO:0009059 macromolecule biosynthetic process	GO	0.0138112	386
GO:0090304 nucleic acid metabolic process	GO	0.0138112	437
GO:0015749 monosaccharide transmembrane transport	GO	0.0138112	35
GO:1901137 carbohydrate derivative biosynthetic process	GO	0.0144424	119
GO:0006573 valine metabolic process	GO	0.0145514	12
GO:1901575 organic substance catabolic process	GO	0.0183132	340
GO:0009152 purine ribonucleotide biosynthetic process	GO	0.0190104	30
GO:0009116 nucleoside metabolic process	GO	0.0190104	30
GO:0009311 oligosaccharide metabolic process	GO	0.0190535	38
GO:0046942 carboxylic acid transport	GO	0.0190535	92
GO:0016070 RNA metabolic process	GO	0.0190535	343
GO:0009312 oligosaccharide biosynthetic process	GO	0.0193688	28
GO:0044265 cellular macromolecule catabolic process	GO	0.0197874	39
GO:0046390 ribose phosphate biosynthetic process	GO	0.019899	32
GO:0044272 sulfur compound biosynthetic process	GO	0.0222737	31
GO:0044271 cellular nitrogen compound biosynthetic process	GO	0.0226504	435
GO:0006820 anion transport	GO	0.0242894	147
GO:0044282 small molecule catabolic process	GO	0.0242894	197
GO:0008610 lipid biosynthetic process	GO	0.0245101	57
GO:1901657 glycosyl compound metabolic process	GO	0.0251246	31
GO:0015711 organic anion transport	GO	0.0251246	125
GO:0071826 ribonucleoprotein complex subunit organization	GO	0.0253268	17
GO:0009119 ribonucleoside metabolic process	GO	0.0269525	26
GO:0009259 ribonucleotide metabolic process	GO	0.0269525	50
GO:0034660 ncRNA metabolic process	GO	0.028753	78
GO:0009260 ribonucleotide biosynthetic process	GO	0.028753	31
GO:0051604 protein maturation	GO	0.028822	35
GO:0006996 organelle organization	GO	0.0290178	41
GO:0015740 C4-dicarboxylate transport	GO	0.0290178	10
GO:0044255 cellular lipid metabolic process	GO	0.0294133	91
GO:0015849 organic acid transport	GO	0.0307118	95
GO:0042254 ribosome biogenesis	GO	0.032284	49
GO:0019693 ribose phosphate metabolic process	GO	0.0330309	62
GO:0051179 localization	GO	0.0332579	490
GO:0009056 catabolic process	GO	0.0344397	351
GO:0006629 lipid metabolic process	GO	0.0373862	92
GO:0015748 organophosphate ester transport	GO	0.0408537	14
GO:0072521 purine-containing compound metabolic process	GO	0.045283	64
GO:0042255 ribosome assembly	GO	0.045283	15
GO:0019520 aldonic acid metabolic process	GO	0.0461067	15
GO:0046176 aldonic acid catabolic process	GO	0.0461067	15
GO:0022613 ribonucleoprotein complex biogenesis	GO	0.0461067	50
GO:0098656 anion transmembrane transport	GO	0.0463896	65
GO:0009150 purine ribonucleotide metabolic process	GO	0.0467321	45
GO:0006163 purine nucleotide metabolic process	GO	0.0482208	53
GO:0006399 tRNA metabolic process	GO	0.0486658	48
GO:0009069 serine family amino acid metabolic process	GO	0.0507287	28
GO:0006308 DNA catabolic process	GO	0.0531374	10
GO:0044273 sulfur compound catabolic process	GO	0.0531374	11
GO:0006364 rRNA processing	GO	0.0531374	34
GO:0016072 rRNA metabolic process	GO	0.0531374	34
GO:0006164 purine nucleotide biosynthetic process	GO	0.0531374	35
GO:0006790 sulfur compound metabolic process	GO	0.0531374	79
GO:0022618 ribonucleoprotein complex assembly	GO	0.0576053	16
GO:0009161 ribonucleoside monophosphate metabolic process	GO	0.059387	29
GO:0006811 ion transport	GO	0.0608943	234
GO:0009057 macromolecule catabolic process	GO	0.0687392	56
GO:0034404 nucleobase-containing small molecule biosynthetic process	GO	0.0687392	34
GO:0009123 nucleoside monophosphate metabolic process	GO	0.0687392	30
GO:0000097 sulfur amino acid biosynthetic process	GO	0.0714366	11
GO:0006082 organic acid metabolic process	GO	0.0732942	337
GO:0016053 organic acid biosynthetic process	GO	0.0732942	132
GO:0046394 carboxylic acid biosynthetic process	GO	0.0732942	132
GO:0051252 regulation of RNA metabolic process	GO	0.0732942	196
GO:0009070 serine family amino acid biosynthetic process	GO	0.0774352	14
GO:1903825 organic acid transmembrane transport	GO	0.0868589	49
GO:1905039 carboxylic acid transmembrane transport	GO	0.0868589	49
GO:0072522 purine-containing compound biosynthetic process	GO	0.0873337	36
GO:0042278 purine nucleoside metabolic process	GO	0.0873811	17
GO:0002098 tRNA wobble uridine modification	GO	0.090887	13
GO:0006753 nucleoside phosphate metabolic process	GO	0.0954358	94

## Sheet: rich-5FU Depletion
Geneset name	Database name	FDR adj pval	set.size
eco02040 Flagellar assembly	KEGG	8.89872e-12	32
eco02020 Two-component system	KEGG	0.000889567	138
eco00360 Phenylalanine metabolism	KEGG	0.00206661	29
eco02030 Bacterial chemotaxis	KEGG	0.0112236	18
eco02024 Quorum sensing	KEGG	0.0155787	48
eco00400 Phenylalanine, tyrosine and tryptophan biosynthesis	KEGG	0.0591684	19
PWY-6071 superpathway of phenylethylamine degradation	EcoCYC	0.00167447	12
PWY0-321 phenylacetate degradation I (aerobic)	EcoCYC	0.00707503	10
GO:0006928 movement of cell or subcellular component	GO	8.59522e-08	53
GO:0001539 cilium or flagellum-dependent cell motility	GO	1.56329e-06	37
GO:0071973 bacterial-type flagellum-dependent cell motility	GO	1.56329e-06	37
GO:0097588 archaeal or bacterial-type flagellum-dependent cell motility	GO	1.56329e-06	37
GO:0040011 locomotion	GO	1.76476e-06	57
GO:0048870 cell motility	GO	4.07057e-06	44
GO:0051674 localization of cell	GO	4.07057e-06	44
GO:0015846 polyamine transport	GO	0.000177393	17
GO:0015847 putrescine transport	GO	0.000739154	15
GO:0015696 ammonium transport	GO	0.0022243	28
GO:0015695 organic cation transport	GO	0.00374508	27
GO:0009850 auxin metabolic process	GO	0.00662145	13
GO:0009852 auxin catabolic process	GO	0.00662145	13
GO:0010124 phenylacetate catabolic process	GO	0.00662145	13
GO:0042447 hormone catabolic process	GO	0.00662145	13
GO:0071978 bacterial-type flagellum-dependent swarming motility	GO	0.00662145	12
GO:0042178 xenobiotic catabolic process	GO	0.00937271	19
GO:0051270 regulation of cellular component movement	GO	0.0155551	17
GO:0009410 response to xenobiotic stimulus	GO	0.0157397	23
GO:0010817 regulation of hormone levels	GO	0.0157397	14
GO:0042445 hormone metabolic process	GO	0.0157397	14
GO:0042537 benzene-containing compound metabolic process	GO	0.0157397	21
GO:0009407 toxin catabolic process	GO	0.0157397	16
GO:0006805 xenobiotic metabolic process	GO	0.0228152	22
GO:0071466 cellular response to xenobiotic stimulus	GO	0.0228152	22
GO:0042221 response to chemical	GO	0.0259726	284
GO:0009072 aromatic amino acid family metabolic process	GO	0.0285486	26
GO:0098754 detoxification	GO	0.0413237	28
GO:0040012 regulation of locomotion	GO	0.0457016	16
GO:0043900 regulation of multi-organism process	GO	0.0457016	13
GO:1900190 regulation of single-species biofilm formation	GO	0.0457016	13
GO:0009636 response to toxic substance	GO	0.0457016	50
GO:0009310 amine catabolic process	GO	0.0489779	12
GO:0042402 cellular biogenic amine catabolic process	GO	0.0489779	12
GO:0009242 colanic acid biosynthetic process	GO	0.0489779	11
GO:0046377 colanic acid metabolic process	GO	0.0489779	11
GO:0009073 aromatic amino acid family biosynthetic process	GO	0.0489779	24
GO:2000145 regulation of cell motility	GO	0.054585	15
GO:1902021 regulation of bacterial-type flagellum-dependent cell motility	GO	0.0630968	13
GO:0072337 modified amino acid transport	GO	0.0676586	20
GO:0032879 regulation of localization	GO	0.0862875	23
GO:0009404 toxin metabolic process	GO	0.0973792	19

## Sheet: rich-FUDR - Enrichment
Geneset name	Database name	FDR adj pval	set.size
eco04122 Sulfur relay system	KEGG	7.39252e-06	18
eco01110 Biosynthesis of secondary metabolites	KEGG	0.000831718	253
eco00130 Ubiquinone and other terpenoid-quinone biosynthesis	KEGG	0.00114044	17
eco02060 Phosphotransferase system (PTS)	KEGG	0.00272447	35
eco00540 Lipopolysaccharide biosynthesis	KEGG	0.00437518	26
eco00053 Ascorbate and aldarate metabolism	KEGG	0.0173713	17
eco00290 Valine, leucine and isoleucine biosynthesis	KEGG	0.0200035	14
eco01130 Biosynthesis of antibiotics	KEGG	0.0472828	160
eco00730 Thiamine metabolism	KEGG	0.0472828	11
eco03070 Bacterial secretion system	KEGG	0.0472828	13
eco00190 Oxidative phosphorylation	KEGG	0.0472828	28
eco01120 Microbial metabolism in diverse environments	KEGG	0.0472828	215
eco01503 Cationic antimicrobial peptide (CAMP) resistance	KEGG	0.0535513	30
eco00561 Glycerolipid metabolism	KEGG	0.0547673	12
eco00500 Starch and sucrose metabolism	KEGG	0.0940824	34
eco01210 2-Oxocarboxylic acid metabolism	KEGG	0.0940824	22
eco00040 Pentose and glucuronate interconversions	KEGG	0.0940824	29
PWY-7892 tRNA-uridine 2-thiolation and selenation (bacteria)	EcoCyc	0.000322399	12
LPSSYN-PWY superpathway of lipopolysaccharide biosynthesis	EcoCyc	0.00463569	13
PWY-6823 molybdenum cofactor biosynthesis	EcoCyc	0.00526548	10
THISYN-PWY superpathway of thiamine diphosphate biosynthesis I	EcoCyc	0.0109546	11
PWY0-321 phenylacetate degradation I (aerobic)	EcoCyc	0.0141237	10
PWY0-1335 NADH to cytochrome <i>bo</i> oxidase electron transfer I	EcoCyc	0.0141237	12
THREOCAT-PWY superpathway of L-threonine metabolism	EcoCyc	0.016997	19
PWY0-1348 NADH to dimethyl sulfoxide electron transfer	EcoCyc	0.016997	11
BRANCHED-CHAIN-AA-SYN-PWY superpathway of branched chain amino acid biosynthesis	EcoCyc	0.0406499	14
ARG+POLYAMINE-SYN superpathway of arginine and polyamine biosynthesis	EcoCyc	0.0696625	19
PWY-6071 superpathway of phenylethylamine degradation	EcoCyc	0.0704721	12
GO:0006793 phosphorus metabolic process	GO	7.28078e-05	201
GO:0042181 ketone biosynthetic process	GO	7.28078e-05	17
GO:1901661 quinone metabolic process	GO	7.28078e-05	17
GO:1901663 quinone biosynthetic process	GO	7.28078e-05	17
GO:0006796 phosphate-containing compound metabolic process	GO	0.000209622	186
GO:0042180 cellular ketone metabolic process	GO	0.000421482	34
GO:0055085 transmembrane transport	GO	0.000421482	235
GO:0008643 carbohydrate transport	GO	0.000421482	88
GO:0051186 cofactor metabolic process	GO	0.000746592	153
GO:0006732 coenzyme metabolic process	GO	0.000746592	109
GO:0009404 toxin metabolic process	GO	0.000776239	19
GO:1901135 carbohydrate derivative metabolic process	GO	0.000776239	213
GO:0051234 establishment of localization	GO	0.00105537	444
GO:0006399 tRNA metabolic process	GO	0.00106993	48
GO:0006810 transport	GO	0.00120596	440
GO:0019637 organophosphate metabolic process	GO	0.0012887	146
GO:0008610 lipid biosynthetic process	GO	0.00187565	57
GO:0006790 sulfur compound metabolic process	GO	0.00201004	79
GO:0002098 tRNA wobble uridine modification	GO	0.00313699	13
GO:0042255 ribosome assembly	GO	0.00336972	15
GO:0071826 ribonucleoprotein complex subunit organization	GO	0.00339566	17
GO:0009407 toxin catabolic process	GO	0.00455614	16
GO:0009108 coenzyme biosynthetic process	GO	0.00455614	74
GO:0009103 lipopolysaccharide biosynthetic process	GO	0.00465537	32
GO:0009401 phosphoenolpyruvate-dependent sugar phosphotransferase system	GO	0.00465537	41
GO:0009850 auxin metabolic process	GO	0.00465537	13
GO:0009852 auxin catabolic process	GO	0.00465537	13
GO:0010124 phenylacetate catabolic process	GO	0.00465537	13
GO:0042447 hormone catabolic process	GO	0.00465537	13
GO:0034219 carbohydrate transmembrane transport	GO	0.00569757	51
GO:0044283 small molecule biosynthetic process	GO	0.00582105	204
GO:0031163 metallo-sulfur cluster assembly	GO	0.00584994	16
GO:0022618 ribonucleoprotein complex assembly	GO	0.00584994	16
GO:0044255 cellular lipid metabolic process	GO	0.00584994	91
GO:1901566 organonitrogen compound biosynthetic process	GO	0.00584994	270
GO:0009259 ribonucleotide metabolic process	GO	0.00584994	50
GO:0034660 ncRNA metabolic process	GO	0.00584994	78
GO:0051189 prosthetic group metabolic process	GO	0.00626315	10
GO:0006629 lipid metabolic process	GO	0.00658863	92
GO:0000271 polysaccharide biosynthetic process	GO	0.0068848	63
GO:0071702 organic substance transport	GO	0.0068848	310
GO:0006743 ubiquinone metabolic process	GO	0.00817039	10
GO:0006744 ubiquinone biosynthetic process	GO	0.00817039	10
GO:0008653 lipopolysaccharide metabolic process	GO	0.00817039	34
GO:0015749 monosaccharide transmembrane transport	GO	0.00840818	35
GO:0009150 purine ribonucleotide metabolic process	GO	0.00840818	45
GO:0033692 cellular polysaccharide biosynthetic process	GO	0.00855376	61
GO:0016226 iron-sulfur cluster assembly	GO	0.00871411	15
GO:0051188 cofactor biosynthetic process	GO	0.00888797	101
GO:0005976 polysaccharide metabolic process	GO	0.00908988	71
GO:0044264 cellular polysaccharide metabolic process	GO	0.00918889	68
GO:0044272 sulfur compound biosynthetic process	GO	0.00918889	31
GO:0009244 lipopolysaccharide core region biosynthetic process	GO	0.00918889	22
GO:0046401 lipopolysaccharide core region metabolic process	GO	0.00918889	22
GO:0010817 regulation of hormone levels	GO	0.00918889	14
GO:0042445 hormone metabolic process	GO	0.00918889	14
GO:0006163 purine nucleotide metabolic process	GO	0.00979759	53
GO:0034220 ion transmembrane transport	GO	0.0101328	116
GO:0002097 tRNA wobble base modification	GO	0.0102279	17
GO:0006091 generation of precursor metabolites and energy	GO	0.0105765	103
GO:0044262 cellular carbohydrate metabolic process	GO	0.0106423	120
GO:0005975 carbohydrate metabolic process	GO	0.011207	201
GO:0009205 purine ribonucleoside triphosphate metabolic process	GO	0.0140744	22
GO:0008033 tRNA processing	GO	0.0146322	42
GO:0055114 oxidation-reduction process	GO	0.0149103	134
GO:0034637 cellular carbohydrate biosynthetic process	GO	0.0149103	64
GO:0046942 carboxylic acid transport	GO	0.0158166	92
GO:1901137 carbohydrate derivative biosynthetic process	GO	0.0159683	119
GO:0019693 ribose phosphate metabolic process	GO	0.0169044	63
GO:0015980 energy derivation by oxidation of organic compounds	GO	0.01736	90
GO:0051179 localization	GO	0.01736	491
GO:0009152 purine ribonucleotide biosynthetic process	GO	0.0175131	30
GO:1901136 carbohydrate derivative catabolic process	GO	0.0181416	45
GO:1903509 liposaccharide metabolic process	GO	0.0181416	37
GO:0046390 ribose phosphate biosynthetic process	GO	0.0182295	32
GO:0072521 purine-containing compound metabolic process	GO	0.0193813	64
GO:0009199 ribonucleoside triphosphate metabolic process	GO	0.0193813	23
GO:0016051 carbohydrate biosynthetic process	GO	0.0212429	76
GO:0010467 gene expression	GO	0.0219226	392
GO:0009260 ribonucleotide biosynthetic process	GO	0.0221447	31
GO:0006040 amino sugar metabolic process	GO	0.0225383	14
GO:0006164 purine nucleotide biosynthetic process	GO	0.0225383	35
GO:0006996 organelle organization	GO	0.0286955	41
GO:0072522 purine-containing compound biosynthetic process	GO	0.0293372	36
GO:0008645 hexose transmembrane transport	GO	0.029962	21
GO:0009059 macromolecule biosynthetic process	GO	0.031099	387
GO:0098657 import into cell	GO	0.031099	23
GO:0009061 anaerobic respiration	GO	0.0322724	53
GO:0006400 tRNA modification	GO	0.0323982	38
GO:0034645 cellular macromolecule biosynthetic process	GO	0.0323982	382
GO:0006082 organic acid metabolic process	GO	0.0323982	337
GO:0009117 nucleotide metabolic process	GO	0.0358853	92
GO:0022607 cellular component assembly	GO	0.0362693	158
GO:0016054 organic acid catabolic process	GO	0.0383649	136
GO:0009144 purine nucleoside triphosphate metabolic process	GO	0.0388149	25
GO:0006820 anion transport	GO	0.0405442	147
GO:0015849 organic acid transport	GO	0.0415975	95
GO:0090407 organophosphate biosynthetic process	GO	0.0420433	85
GO:0006635 fatty acid beta-oxidation	GO	0.0420433	16
GO:0034622 cellular protein-containing complex assembly	GO	0.0432658	35
GO:0016043 cellular component organization	GO	0.0442743	241
GO:0009123 nucleoside monophosphate metabolic process	GO	0.0475733	30
GO:1902600 proton transmembrane transport	GO	0.0488312	15
GO:1901264 carbohydrate derivative transport	GO	0.0494698	28
GO:0006753 nucleoside phosphate metabolic process	GO	0.0494698	95
GO:0070925 organelle assembly	GO	0.0494698	23
GO:0006308 DNA catabolic process	GO	0.0499197	10
GO:0019748 secondary metabolic process	GO	0.0509168	30
GO:0009070 serine family amino acid biosynthetic process	GO	0.0509168	14
GO:0046434 organophosphate catabolic process	GO	0.0509168	34
GO:0015698 inorganic anion transport	GO	0.0515336	23
GO:0043933 protein-containing complex subunit organization	GO	0.0535045	126
GO:0098739 import across plasma membrane	GO	0.055423	21
GO:0030258 lipid modification	GO	0.055572	21
GO:0090304 nucleic acid metabolic process	GO	0.0604884	438
GO:0006811 ion transport	GO	0.0605891	234
GO:0043436 oxoacid metabolic process	GO	0.0623844	326
GO:0034655 nucleobase-containing compound catabolic process	GO	0.0623844	58
GO:0006396 RNA processing	GO	0.0623844	76
GO:0034470 ncRNA processing	GO	0.066833	71
GO:0071840 cellular component organization or biogenesis	GO	0.0728565	292
GO:0098656 anion transmembrane transport	GO	0.0728902	65
GO:0009312 oligosaccharide biosynthetic process	GO	0.0728902	28
GO:0015772 oligosaccharide transport	GO	0.0728902	12
GO:0098660 inorganic ion transmembrane transport	GO	0.0728902	47
GO:0046128 purine ribonucleoside metabolic process	GO	0.0728902	13
GO:1903825 organic acid transmembrane transport	GO	0.0728902	49
GO:1905039 carboxylic acid transmembrane transport	GO	0.0728902	49
GO:0044085 cellular component biogenesis	GO	0.0749419	213
GO:0016070 RNA metabolic process	GO	0.0749419	344
GO:0044271 cellular nitrogen compound biosynthetic process	GO	0.0749419	436
GO:0044282 small molecule catabolic process	GO	0.0757147	198
GO:0016310 phosphorylation	GO	0.0789634	54
GO:0009161 ribonucleoside monophosphate metabolic process	GO	0.0789634	29
GO:0005996 monosaccharide metabolic process	GO	0.0789634	68
GO:0015807 L-amino acid transport	GO	0.0789634	29
GO:0044273 sulfur compound catabolic process	GO	0.0789634	11
GO:0009141 nucleoside triphosphate metabolic process	GO	0.0790599	28
GO:0045333 cellular respiration	GO	0.0790599	82
GO:0098662 inorganic cation transmembrane transport	GO	0.0790599	39
GO:0006733 oxidoreduction coenzyme metabolic process	GO	0.0790599	43
GO:0019538 protein metabolic process	GO	0.0856205	203
GO:0006412 translation	GO	0.0857958	34
GO:0009145 purine nucleoside triphosphate biosynthetic process	GO	0.0857958	16
GO:0009201 ribonucleoside triphosphate biosynthetic process	GO	0.0857958	16
GO:0009206 purine ribonucleoside triphosphate biosynthetic process	GO	0.0857958	16
GO:0006633 fatty acid biosynthetic process	GO	0.0865655	10
GO:0015672 monovalent inorganic cation transport	GO	0.0887609	31
GO:0051336 regulation of hydrolase activity	GO	0.096784	12

## Sheet: rich-FUDR - Depletion
Geneset name	Database name	FDR adj pval	set.size
eco03440 Homologous recombination	KEGG	0.0433855	19
eco00230 Purine metabolism	KEGG	0.0433855	66
eco02040 Flagellar assembly	KEGG	0.0554181	32
eco01220 Degradation of aromatic compounds	KEGG	0.0554181	17
GO:0006928 movement of cell or subcellular component	GO	0.0126226	53
GO:0040011 locomotion	GO	0.0126226	57
GO:0051704 multi-organism process	GO	0.0126226	118
GO:0001539 cilium or flagellum-dependent cell motility	GO	0.0126226	37
GO:0071973 bacterial-type flagellum-dependent cell motility	GO	0.0126226	37
GO:0097588 archaeal or bacterial-type flagellum-dependent cell motility	GO	0.0126226	37
GO:0017144 drug metabolic process	GO	0.0128041	151
GO:0006952 defense response	GO	0.0207948	10
GO:0048870 cell motility	GO	0.0251171	44
GO:0051674 localization of cell	GO	0.0251171	44
GO:0009607 response to biotic stimulus	GO	0.0251171	12
GO:0009615 response to virus	GO	0.0251171	12
GO:0043207 response to external biotic stimulus	GO	0.0251171	12
GO:0051707 response to other organism	GO	0.0251171	12
GO:0046688 response to copper ion	GO	0.0642427	13
GO:0044764 multi-organism cellular process	GO	0.0673969	94
GO:0009605 response to external stimulus	GO	0.0684139	74
