# Supplementary material for: Evolved bacterial resistance against fluoropyrimidines can lower chemotherapy impact in the Caenorhabditis elegans host
Source: eLife. 2020 Nov 30;9:e59831. doi: 10.7554/eLife.59831 (PMC7725501; doi:10.7554/eLife.59831)
Supplement: Supplementary file 3. [file elife-59831-supp3.xlsx]

## Sheet: Slow growth by pval
Gene name	Growth Rate -poor	Growth Rate - rich	Generation time - poor	Generation time - rich	Growth rate pval - poor	Growth rate pval - rich	Generation time pval - poor	Generation time pval - rich	Slow by growth rate - poor	Slow by growth rate -rich	Slow by generation time - poor	Slow by generation time - rich
'aceF'	0.963354	1.76041	43.1832	23.6301	0.0365101	0.00934912	0.0519578	0.023807	1	1	1	1		p-val
'ackA'	0.852309	1.59474	48.8089	26.0855	6.34728e-09	2.74507e-06	2.79268e-09	4.04163e-06	1	1	1	1		0.1
'arcA'	0.850235	1.70499	48.9185	24.4463	5.25413e-09	0.000473617	2.2754e-09	0.00106432	1	1	1	1
'aroA'	1.01047	1.77679	41.1905	23.4104	0.987405	0.0222709	0.983121	0.0520497	0	1	0	1
'aroB'	1.03245	1.94339	40.3344	21.4002	0.999759	0.986167	0.999422	0.979653	0	0	0	0		Slow = 1
'atpA'	0.894003	1.60225	46.5389	25.9928	5.40404e-07	3.73958e-06	4.47462e-07	5.32979e-06	1	1	1	1		Normal = 0
'atpC'	0.985004	1.68829	42.2716	24.6532	0.542135	0.000199777	0.553372	0.000488877	0	1	0	1
'atpF'	0.920032	1.53478	45.2244	27.1312	1.98696e-05	2.81314e-07	2.3336e-05	2.3801e-07	1	1	1	1
'atpG'	0.998721	2.11954	41.6491	19.6233	0.909281	0.999998	0.911046	0.99997	0	0	0	0
'bioB'	0	1.44819	Inf	29.0477	4.46142e-20	1.74121e-08	0	3.90045e-09	1	1	1	1
'chpS'	0.897297	1.8945	46.3559	21.9527	8.18131e-07	0.854129	7.35145e-07	0.867987	1	0	1	0
'cmk'	0.946118	1.58567	44.0398	26.2281	0.00165013	1.90277e-06	0.00188229	2.66433e-06	1	1	1	1
'deaD'	0.954616	1.75253	43.7631	23.8255	0.00779108	0.00610917	0.00565828	0.0114794	1	1	1	1
'deoC'	1.03883	1.70933	40.0727	24.371	0.999918	0.000595269	0.999787	0.00141731	0	1	0	1
'deoR'	1.02099	1.6891	40.7342	24.6218	0.998148	0.000208229	0.997217	0.000549455	0	1	0	1
'dnaB'	1.05505	2.02704	39.4189	20.5237	0.999993	0.999839	0.999979	0.999279	0	0	0	0
'fepG'	0.708365	1.85468	58.7633	22.4351	6.17216e-13	0.490181	2.19839e-14	0.57874	1	0	1	0
'fis'	0.973934	1.71128	42.7026	24.3052	0.181067	0.000659764	0.231992	0.00182277	0	1	0	1
'ftsE'	0.768081	1.41853	54.1545	29.4172	1.3774e-11	7.50321e-09	1.49347e-12	1.99156e-09	1	1	1	1
'ftsX'	0.799958	1.53992	52.0081	27.064	1.02786e-10	3.37687e-07	1.89819e-11	2.81353e-07	1	1	1	1
'gidA'	0.784811	1.46136	53.1186	28.4664	3.80954e-11	2.57306e-08	4.79632e-12	1.2044e-08	1	1	1	1
'guaA'	0.9682	0.873614	42.9578	47.6364	0.0800797	2.99632e-13	0.111053	1.42614e-16	1	1	0	1
'hemG'	1.04394	1.93507	39.8418	21.5042	0.999964	0.978562	0.999909	0.970231	0	0	0	0
'hflD'	1.02068	1.86505	40.773	22.3095	0.998043	0.603439	0.996751	0.671344	0	0	0	0
'hsrA'	1.01926	1.8357	40.8713	22.6593	0.997462	0.292308	0.995196	0.404927	0	0	0	0
'icd'	0.953339	1.79772	43.6711	23.1373	0.00617412	0.0632717	0.00814829	0.125506	1	1	1	0
'ihfA'	0.954436	1.93113	43.5842	21.5361	0.00753955	0.973714	0.0114743	0.966615	1	0	1	0
'ihfB'	0.901256	2.11323	46.1707	19.6888	1.36687e-06	0.999997	1.23527e-06	0.999963	1	0	1	0
'lipA'	1.09252	1.85043	38.0781	22.4791	1	0.443543	1	0.54478	0	0	0	0
'lpcA'	0.879027	1.71506	48.3762	24.4139	9.34218e-08	0.000806295	6.46163e-09	0.00120345	1	1	1	1
'nadA'	0	1.44577	Inf	28.8118	4.46142e-20	1.62232e-08	1.90277e-21	6.09804e-09	1	1	1	1
'nadB'	1.00183	1.87378	41.5167	22.2146	0.94425	0.692108	0.943359	0.734492	0	0	0	0
'nadC'	1.07577	1.76611	38.6597	23.5716	1	0.0126858	0.999998	0.029469	0	1	0	1
'ndh'	0.939251	1.42743	44.2812	29.1411	0.000480771	9.60826e-09	0.000728753	3.28115e-09	1	1	1	1
'nlpI'	0.971202	1.68716	42.8648	24.6535	0.124971	0.00018862	0.14774	0.000488236	0	1	0	1
'pitA'	0.799792	1.31215	52.0143	31.7592	1.0163e-10	5.24245e-10	1.8829e-11	5.26559e-11	1	1	1	1
'plsB'	0.907333	2.03083	45.849	20.4836	3.10668e-06	0.999867	3.17248e-06	0.99938	1	0	1	0
'poxA'	0.912915	1.78086	45.5573	23.3621	6.85671e-06	0.0274817	7.8328e-06	0.061334	1	1	1	1
'ppc'	0.791355	1.91861	52.5735	21.6766	5.79729e-11	0.95072	9.25699e-12	0.94539	1	0	1	0
'proQ'	0.954336	1.75685	43.6104	23.6987	0.00740391	0.00771714	0.0103525	0.018482	1	1	1	1
'pta'	0.942916	1.32723	44.1315	31.3577	0.000924398	7.42034e-10	0.00130989	9.19859e-11	1	1	1	1
'ptsI'	0.952124	1.92679	43.6821	21.5868	0.0049444	0.967191	0.00780234	0.960021	1	0	1	0
'ptsP'	0.994731	1.67087	41.8839	25.0185	0.839704	8.36406e-05	0.81751	0.000129568	0	1	0	1
'racC'	0.896428	1.46456	46.4179	28.4573	7.32489e-07	2.83315e-08	6.2022e-07	1.22683e-08	1	1	1	1
'rfaC'	0.984877	2.01899	42.2366	20.6025	0.537457	0.999757	0.581238	0.999029	0	0	0	0
'rfaD'	0.979004	1.81607	42.4877	22.9048	0.325689	0.14256	0.38069	0.23726	0	0	0	0
'rfaF'	0.906018	1.72547	45.9113	24.1033	2.59203e-06	0.00140845	2.63108e-06	0.00396097	1	1	1	1
'rffG'	0.974548	1.56265	42.6771	26.6155	0.195815	7.78537e-07	0.247584	9.02959e-07	0	1	0	1
'rnc'	0.821159	1.37179	50.65	30.3393	4.7182e-10	2.18768e-09	1.26953e-10	4.23748e-10	1	1	1	1
'rnt'	1.00148	1.44642	41.5314	28.7598	0.941006	1.65332e-08	0.940363	6.7419e-09	0	1	0	1
'rpiA'	0.953427	1.69765	43.7188	24.7079	0.00627417	0.00032305	0.00674591	0.000399068	1	1	1	1
'rplI'	1.04986	1.61158	39.615	25.9704	0.999986	5.53769e-06	0.999959	5.70307e-06	0	1	0	1
'rpmB'	1.0942	2.14381	38.0435	19.4212	1	0.999999	1	0.999985	0	0	0	0
'rpsO'	0.919938	1.95416	45.2135	21.2952	1.95864e-05	0.992233	2.42128e-05	0.986256	1	0	1	0
'rpsT'	0.924424	1.99281	44.996	20.8811	3.95462e-05	0.99904	5.12554e-05	0.997183	1	0	1	0
'sodA'	0.815867	1.92309	51.2221	21.6559	3.17313e-10	0.960498	5.51717e-11	0.94914	1	0	1	0
'sohA'	0.997553	1.77107	41.721	23.4824	0.892073	0.0165043	0.887775	0.0405127	0	1	0	1
'sspA'	0.918584	1.68405	45.2986	24.8617	1.59211e-05	0.000161147	1.81923e-05	0.000227288	1	1	1	1
'tdcB'	0.707046	1.74793	58.8236	23.9385	5.80683e-13	0.00475905	2.09723e-14	0.0074618	1	1	1	1
'tdk'	0.925165	1.8888	44.9709	22.0247	4.4522e-05	0.817364	5.59846e-05	0.83764	1	0	1	0
'thiI'	0.968849	1.53506	42.9439	27.1141	0.0884435	2.84069e-07	0.116021	2.48273e-07	1	1	0	1
'trmE'	1.00486	1.84314	41.3876	22.5928	0.966332	0.365706	0.964431	0.456038	0	0	0	0
'trmU'	0.929259	1.8623	44.7566	22.3408	8.67697e-05	0.573969	0.0001209	0.649088	1	0	1	0
'trpC'	0.898603	1.75243	46.291	23.7931	9.67267e-07	0.0060751	8.79912e-07	0.0129742	1	1	1	1
'ubiB'	1.10277	1.89845	37.7746	21.909	1	0.876188	1	0.884202	0	0	0	0
'ubiF'	0.789169	1.14049	52.7201	36.4657	5.03141e-11	1.6929e-11	7.73199e-12	2.8094e-13	1	1	1	1
'ubiH'	0.874971	1.27897	47.5523	32.5905	6.00554e-08	2.51422e-10	3.71818e-08	1.77669e-11	1	1	1	1
'ubiX'	1.05514	1.84386	39.4249	22.5559	0.999993	0.373175	0.999979	0.484817	0	0	0	0
'udk'	0.932336	1.7979	44.6146	23.1487	0.000145213	0.0637971	0.000204221	0.121271	1	1	1	0
'udp'	0.945211	1.77798	44.0165	23.4433	0.00139955	0.0236909	0.00206486	0.0464514	1	1	1	1
'upp'	0.926023	1.76054	44.913	23.642	5.11184e-05	0.00941185	6.87423e-05	0.0227923	1	1	1	1
'uraA'	0.910788	1.81182	45.6659	22.9785	5.04907e-06	0.119409	5.56373e-06	0.196411	1	0	1	0
'xerD'	0.770058	1.68848	54.1918	24.6787	1.54726e-11	0.000201691	1.43457e-12	0.000444652	1	1	1	1
'yadR'	1.12002	2.00303	37.1323	20.7751	1	0.999442	1	0.998125	0	0	0	0
'ybeD'	0.939798	1.76479	44.253	23.5885	0.000529662	0.0118252	0.000813549	0.0277126	1	1	1	1
'ybgT'	0.961973	1.18133	43.2381	35.2066	0.028847	3.55211e-11	0.0426654	9.42905e-13	1	1	1	1
'yeiN'	1.0305	1.77847	40.3606	23.3928	0.999662	0.0243009	0.999361	0.0552796	0	1	0	1
'yfjG'	0.816463	1.34422	50.9402	30.9391	3.31622e-10	1.10969e-09	8.26498e-11	1.6883e-10	1	1	1	1
'yhbC'	0.99412	1.83668	41.8352	22.6436	0.826228	0.301482	0.841205	0.416854	0	0	0	0
'yheL'	0.887552	1.55037	47.037	26.8252	2.47447e-07	4.92946e-07	1.25064e-07	5.17767e-07	1	1	1	1
'yheM'	0.828648	1.076	50.206	38.6526	8.44154e-10	5.67645e-12	2.51571e-10	4.32808e-14	1	1	1	1
'yheN'	0.793708	0.958861	52.4167	43.4028	6.76418e-11	9.56311e-13	1.12547e-11	1.55259e-15	1	1	1	1
'yhhp'	1.07829	1.966	38.6016	21.1789	1	0.995913	0.999998	0.991158	0	0	0	0
'yidD'	0.801378	1.38913	51.8982	29.9411	1.13247e-10	3.41243e-09	2.19258e-11	8.09383e-10	1	1	1	1
'yifE'	0.781348	1.80048	53.2299	23.1198	3.06641e-11	0.0720113	4.20972e-12	0.132183	1	1	1	0
'yjeB'	1.03299	1.79816	40.3207	23.1289	0.999781	0.0646	0.999452	0.128659	0	1	0	0
'yjeF'	1.05962	2.01139	39.3643	20.6802	0.999997	0.99964	0.999983	0.998696	0	0	0	0
'yjjY'	1.00554	1.33067	41.3724	31.2584	0.96999	8.04331e-10	0.96637	1.05978e-10	0	1	0	1
'yqiC'	0.861532	1.68596	48.448	24.7819	1.51868e-08	0.000177509	5.60292e-09	0.000303976	1	1	1	1

## Sheet: Slow growth by fold change
Gene name	Growth Rate -poor	Growth Rate - rich	Generation time - poor	Generation time - rich	Growth rate fold change - poor	Growth rate fold change - rich	Generation time fold change - poor	Generation time fold change - rich	Slow by growth rate - poor	Slow by growth rate -rich	Slow by generation time - poor	Slow by generation time - rich
'aceF'	0.963354	1.76041	43.1832	23.6301	0.979148	0.948721	1.01997	1.04853	0	0	0	0		Growth rate fold	Generation time fold
'ackA'	0.852309	1.59474	48.8089	26.0855	0.866283	0.859439	1.15284	1.15748	0	0	0	0		0.75	1.25
'arcA'	0.850235	1.70499	48.9185	24.4463	0.864175	0.918852	1.15543	1.08474	0	0	0	0
'aroA'	1.01047	1.77679	41.1905	23.4104	1.02703	0.957548	0.972902	1.03878	0	0	0	0		Slow = 1
'aroB'	1.03245	1.94339	40.3344	21.4002	1.04938	1.04733	0.952681	0.94958	0	0	0	0		Normal = 0
'atpA'	0.894003	1.60225	46.5389	25.9928	0.908661	0.863483	1.09923	1.15337	0	0	0	0
'atpC'	0.985004	1.68829	42.2716	24.6532	1.00115	0.909853	0.998437	1.09392	0	0	0	0
'atpF'	0.920032	1.53478	45.2244	27.1312	0.935116	0.827124	1.06818	1.20388	0	0	0	0
'atpG'	0.998721	2.11954	41.6491	19.6233	1.0151	1.14226	0.983734	0.870734	0	0	0	0
'bioB'	0	1.44819	Inf	29.0477	0	0.780458	Inf	1.28892	1	0	1	1
'chpS'	0.897297	1.8945	46.3559	21.9527	0.912009	1.02098	1.09491	0.974098	0	0	0	0
'cmk'	0.946118	1.58567	44.0398	26.2281	0.96163	0.854547	1.0402	1.1638	0	0	0	0
'deaD'	0.954616	1.75253	43.7631	23.8255	0.970267	0.944475	1.03367	1.05719	0	0	0	0
'deoC'	1.03883	1.70933	40.0727	24.371	1.05587	0.921193	0.9465	1.0814	0	0	0	0
'deoR'	1.02099	1.6891	40.7342	24.6218	1.03773	0.910291	0.962124	1.09253	0	0	0	0
'dnaB'	1.05505	2.02704	39.4189	20.5237	1.07235	1.09241	0.931058	0.910689	0	0	0	0
'fepG'	0.708365	1.85468	58.7633	22.4351	0.719979	0.999521	1.38796	0.995503	1	0	1	0
'fis'	0.973934	1.71128	42.7026	24.3052	0.989902	0.922242	1.00862	1.07848	0	0	0	0
'ftsE'	0.768081	1.41853	54.1545	29.4172	0.780674	0.764476	1.27911	1.30532	0	0	1	1
'ftsX'	0.799958	1.53992	52.0081	27.064	0.813074	0.829893	1.22841	1.2009	0	0	0	0
'gidA'	0.784811	1.46136	53.1186	28.4664	0.797678	0.787558	1.25464	1.26313	0	0	1	1
'guaA'	0.9682	0.873614	42.9578	47.6364	0.984074	0.470808	1.01464	2.11374	0	1	0	1
'hemG'	1.04394	1.93507	39.8418	21.5042	1.06106	1.04285	0.941047	0.954196	0	0	0	0
'hflD'	1.02068	1.86505	40.773	22.3095	1.03742	1.00511	0.963041	0.989926	0	0	0	0
'hsrA'	1.01926	1.8357	40.8713	22.6593	1.03597	0.989296	0.965363	1.00545	0	0	0	0
'icd'	0.953339	1.79772	43.6711	23.1373	0.96897	0.968829	1.03149	1.02666	0	0	0	0
'ihfA'	0.954436	1.93113	43.5842	21.5361	0.970084	1.04072	1.02944	0.95561	0	0	0	0
'ihfB'	0.901256	2.11323	46.1707	19.6888	0.916033	1.13886	1.09053	0.873639	0	0	0	0
'lipA'	1.09252	1.85043	38.0781	22.4791	1.11043	0.997235	0.899389	0.997455	0	0	0	0
'lpcA'	0.879027	1.71506	48.3762	24.4139	0.893439	0.924277	1.14263	1.08331	0	0	0	0
'nadA'	0	1.44577	Inf	28.8118	0	0.779152	Inf	1.27845	1	0	1	1
'nadB'	1.00183	1.87378	41.5167	22.2146	1.01825	1.00982	0.980608	0.985719	0	0	0	0
'nadC'	1.07577	1.76611	38.6597	23.5716	1.09341	0.951792	0.913126	1.04593	0	0	0	0
'ndh'	0.939251	1.42743	44.2812	29.1411	0.95465	0.769269	1.0459	1.29306	0	0	0	1
'nlpI'	0.971202	1.68716	42.8648	24.6535	0.987125	0.909244	1.01245	1.09394	0	0	0	0
'pitA'	0.799792	1.31215	52.0143	31.7592	0.812905	0.707144	1.22856	1.40924	0	1	0	1
'plsB'	0.907333	2.03083	45.849	20.4836	0.922209	1.09446	1.08293	0.908906	0	0	0	0
'poxA'	0.912915	1.78086	45.5573	23.3621	0.927883	0.959742	1.07604	1.03663	0	0	0	0
'ppc'	0.791355	1.91861	52.5735	21.6766	0.804329	1.03397	1.24176	0.961846	0	0	0	0
'proQ'	0.954336	1.75685	43.6104	23.6987	0.969983	0.946803	1.03006	1.05157	0	0	0	0
'pta'	0.942916	1.32723	44.1315	31.3577	0.958375	0.71527	1.04237	1.39142	0	1	0	1
'ptsI'	0.952124	1.92679	43.6821	21.5868	0.967734	1.03838	1.03175	0.95786	0	0	0	0
'ptsP'	0.994731	1.67087	41.8839	25.0185	1.01104	0.900466	0.98928	1.11013	0	0	0	0
'racC'	0.896428	1.46456	46.4179	28.4573	0.911125	0.789279	1.09637	1.26272	0	0	0	1
'rfaC'	0.984877	2.01899	42.2366	20.6025	1.00102	1.08807	0.997611	0.914185	0	0	0	0
'rfaD'	0.979004	1.81607	42.4877	22.9048	0.995056	0.978714	1.00354	1.01634	0	0	0	0
'rfaF'	0.906018	1.72547	45.9113	24.1033	0.920873	0.929889	1.08441	1.06952	0	0	0	0
'rffG'	0.974548	1.56265	42.6771	26.6155	0.990526	0.842143	1.00801	1.181	0	0	0	0
'rnc'	0.821159	1.37179	50.65	30.3393	0.834622	0.739284	1.19633	1.34623	0	1	0	1
'rnt'	1.00148	1.44642	41.5314	28.7598	1.0179	0.779502	0.980955	1.27614	0	0	0	1
'rpiA'	0.953427	1.69765	43.7188	24.7079	0.969059	0.914897	1.03262	1.09635	0	0	0	0
'rplI'	1.04986	1.61158	39.615	25.9704	1.06707	0.868511	0.935689	1.15237	0	0	0	0
'rpmB'	1.0942	2.14381	38.0435	19.4212	1.11214	1.15534	0.898572	0.861767	0	0	0	0
'rpsO'	0.919938	1.95416	45.2135	21.2952	0.935021	1.05313	1.06792	0.94492	0	0	0	0
'rpsT'	0.924424	1.99281	44.996	20.8811	0.93958	1.07396	1.06279	0.926548	0	0	0	0
'sodA'	0.815867	1.92309	51.2221	21.6559	0.829243	1.03639	1.20984	0.960925	0	0	0	0
'sohA'	0.997553	1.77107	41.721	23.4824	1.01391	0.954465	0.985434	1.04197	0	0	0	0
'sspA'	0.918584	1.68405	45.2986	24.8617	0.933644	0.907568	1.06993	1.10318	0	0	0	0
'tdcB'	0.707046	1.74793	58.8236	23.9385	0.718638	0.941994	1.38939	1.06221	1	0	1	0
'tdk'	0.925165	1.8888	44.9709	22.0247	0.940333	1.01791	1.06219	0.977289	0	0	0	0
'thiI'	0.968849	1.53506	42.9439	27.1141	0.984734	0.827273	1.01432	1.20312	0	0	0	0
'trmE'	1.00486	1.84314	41.3876	22.5928	1.02134	0.993303	0.977558	1.0025	0	0	0	0
'trmU'	0.929259	1.8623	44.7566	22.3408	0.944495	1.00363	1.05713	0.991315	0	0	0	0
'trpC'	0.898603	1.75243	46.291	23.7931	0.913336	0.94442	1.09337	1.05576	0	0	0	0
'ubiB'	1.10277	1.89845	37.7746	21.909	1.12085	1.02311	0.892221	0.972155	0	0	0	0
'ubiF'	0.789169	1.14049	52.7201	36.4657	0.802108	0.614633	1.24523	1.61808	0	1	0	1
'ubiH'	0.874971	1.27897	47.5523	32.5905	0.889316	0.689263	1.12316	1.44612	0	1	0	1
'ubiX'	1.05514	1.84386	39.4249	22.5559	1.07244	0.993691	0.931199	1.00086	0	0	0	0
'udk'	0.932336	1.7979	44.6146	23.1487	0.947622	0.968923	1.05378	1.02717	0	0	0	0
'udp'	0.945211	1.77798	44.0165	23.4433	0.960708	0.95819	1.03965	1.04024	0	0	0	0
'upp'	0.926023	1.76054	44.913	23.642	0.941206	0.948788	1.06083	1.04905	0	0	0	0
'uraA'	0.910788	1.81182	45.6659	22.9785	0.925721	0.976426	1.07861	1.01961	0	0	0	0
'xerD'	0.770058	1.68848	54.1918	24.6787	0.782684	0.909954	1.27999	1.09506	0	0	1	0
'yadR'	1.12002	2.00303	37.1323	20.7751	1.13838	1.07947	0.87705	0.921844	0	0	0	0
'ybeD'	0.939798	1.76479	44.253	23.5885	0.955206	0.951083	1.04524	1.04668	0	0	0	0
'ybgT'	0.961973	1.18133	43.2381	35.2066	0.977745	0.636641	1.02127	1.56221	0	1	0	1
'yeiN'	1.0305	1.77847	40.3606	23.3928	1.0474	0.958455	0.953299	1.038	0	0	0	0
'yfjG'	0.816463	1.34422	50.9402	30.9391	0.829849	0.724429	1.20319	1.37284	0	1	0	1
'yhbC'	0.99412	1.83668	41.8352	22.6436	1.01042	0.989821	0.988131	1.00475	0	0	0	0
'yheL'	0.887552	1.55037	47.037	26.8252	0.902104	0.835522	1.11099	1.1903	0	0	0	0
'yheM'	0.828648	1.076	50.206	38.6526	0.842234	0.579878	1.18585	1.71511	0	1	0	1
'yheN'	0.793708	0.958861	52.4167	43.4028	0.806721	0.516749	1.23806	1.92589	0	1	0	1
'yhhp'	1.07829	1.966	38.6016	21.1789	1.09596	1.05952	0.911754	0.93976	0	0	0	0
'yidD'	0.801378	1.38913	51.8982	29.9411	0.814517	0.748628	1.22581	1.32856	0	1	0	1
'yifE'	0.781348	1.80048	53.2299	23.1198	0.794158	0.970316	1.25727	1.02588	0	0	1	0
'yjeB'	1.03299	1.79816	40.3207	23.1289	1.04993	0.969066	0.952357	1.02629	0	0	0	0
'yjeF'	1.05962	2.01139	39.3643	20.6802	1.077	1.08398	0.929769	0.917632	0	0	0	0
'yjjY'	1.00554	1.33067	41.3724	31.2584	1.02202	0.717126	0.9772	1.38701	0	1	0	1
'yqiC'	0.861532	1.68596	48.448	24.7819	0.875657	0.908598	1.14432	1.09963	0	0	0	0
