# Supplementary material for: Evolved bacterial resistance against fluoropyrimidines can lower chemotherapy impact in the Caenorhabditis elegans host
Source: eLife. 2020 Nov 30;9:e59831. doi: 10.7554/eLife.59831 (PMC7725501; doi:10.7554/eLife.59831)
Supplement: Supplementary file 4. [file elife-59831-supp4.xlsx]

## Sheet: Sheet1
Strain name	Colony Sequenced	Evolved Condition	IC50 - poor-5FU	IC50 - poor-FUDR	IC50 - rich-5FU	IC50 - rich-FUDR	Doubling time (min) - poor	Doubling time (min) - rich
S01	C05	poor-5FU	56.3412	10.9861	56.5864	5.79047	35.5431	23.6599
S02	C10	poor-5FU	96.3878	19.0298	40.0727	5.76349	39.5924	27.1523
S03	C10	poor-5FU	92.9365	15.3384	39.0052	5.72576	40.4951	26.8224
S04	C01	poor-5FU	104.611	25.7936	54.2916	5.654	38.3284	23.7814
S05	C01	poor-FUDR	> 104.6	53.7822	32.9404	214.528	39.1035	31.3411
S06	C02	poor-FUDR	> 104.6	78.4966	30.1975	228.762	40.3821	34.7386
S07	C01	poor-FUDR	37.3233	3.58423	29.4249	9.44934	42.6256	37.7691
S08	C03	poor-FUDR	> 104.6	209.756	34.2538	169.116	40.8702	38.9382
S09	C05	rich-FUDR	1.48292	1.00757	97.9459	36.8617	37.5576	26.7084
S10	C08	rich-FUDR	1.29245	1.00127	31.5263	46.3447	38.8506	39.4141
S11	C06	rich-FUDR	1.32844	1.28703	110.64	106.394	45.6431	32.7988
S12	C08	rich-FUDR	1.13612	1.03574	83.7495	93.9001	44.47	32.4706
S13	C08	rich-5FU	2.23649	1.45394	92.1416	13.9456	41.916	23.242
S14	C09	rich-5FU	1.88678	1.24141	71.7299	11.4524	39.8032	23.1735
S15	C08	rich-5FU	1.83548	1.80132	129.287	34.9489	38.1996	25.736
S16	C05	rich-5FU	0.177183	0.160433	69.0961	10.4839	44.2154	26.3202
Ancestor	C01	Nan	1.79857	1.09398	35.4865	5.47693	44.5039	24.0594
