# Supplementary material for: Evolved bacterial resistance against fluoropyrimidines can lower chemotherapy impact in the Caenorhabditis elegans host
Source: eLife. 2020 Nov 30;9:e59831. doi: 10.7554/eLife.59831 (PMC7725501; doi:10.7554/eLife.59831)
Supplement: Supplementary file 5. [file elife-59831-supp5.xlsx]

## Sheet: Sheet Description
Sheet Description
Gene Summary		A detailed summary of all mutations identified in the 16 evolved strains that were sequenced. This contains details of the mutation type/annotation, coverage, gene description, and loss of function (LOF) validation results.
Gene Hit Counts		A table with the counts of mutations per gene across each of the 16 evolved strains that were sequenced. Red tiles indicate mutations are LOF.
Validation-OD		Optical density [OD600] of each ASKA deletion and ancestor strain tested in the validation small screen for each media/drug combination.
Validation-pval		p-values calculated using a one-tailed ttest for each validated ASKA strain to determine strains with significant resistance in each media/drug combination.
Validated Hit Counts		Table of all genes mutated in the 16 evolved strains grouped by evolved media/drug condition and their LOF validation status per condition.

## Sheet: Gene Summary
ID	Drug	Media	gene	Coverage	Mutation	annotation	type	mutation results	Region	Gene Description	Other	LOFvsMODIFICATION	LOF Validated resistance	Other condition LOF Validation	Frequency	RNAseq Sig Hit
S01	5FU	M9	flk	8	G→A	W56* (TGG→TGA)	base substitution	Premature stopcodon	coding	putative flagella assembly protein		LOF	NO	rich-5FU, rich-FUDR	100	No
S01	5FU	M9	upp	11	Δ9 bp	coding (424‑432/627 nt)	deletion	ATGAAGATCGTGGAAGTCAAACACCCACTCGTCAAACACAAGCTGGGACTGATGCGTGAGCAAGATATCAGCACCAAGCGCTTTCGCGAACTCGCTTCCGAAGTGGGTAGCCTGCTGACTTACGAAGCGACCGCCGACCTCGAAACGGAAAAAGTAACTATCGAAGGCTGGAACGGCCCGGTAGAAATCGACCAGATCAAAGGTAAGAAAATTACCGTTGTGCCAATTCTGCGTGCGGGTCTTGGTATGATGGACGGTGTGCTGGAAAACGTTCCGAGCGCGCGCATCAGCGTTGTCGGTATGTACCGTAATGAAGAAACGCTGGAGCCGGTACCGTACTTCCAGAAACTGGTTTCTAACATCGATGAGCGTATGGCGCTGATCGTTGACCCAATGCTG…	coding	uracil phosphoribosyltransferase	this deletion causes the deletion of 3 amino acids in a non binding site area with no frame shift; probably not inactivating (could test with further protein structure analysis)	MODIFICATION	YES	poor-FUDR, rich-5FU	100	No
S01	5FU	M9	rph	10	Δ82 bp		deletion	deletion of pyrE and rph promoter plus beginning of rph	coding	[rph], [rph]	deletion disrupted pyrE promoter region	LOF	YES	poor-FUDR, rich-5FU	100	No
S01	5FU	M9	pyrE	10	Δ82 bp		deletion	deletion of pyrE and rph promoter plus beginning of rph	intergenic/promoter	[rph], [rph]	deletion disrupted pyrE promoter region	MODIFICATION	NO		100	Yes;Up
S01	5FU	M9	yjgX	12	IS5 (–) +4 bp	pseudogene (855‑858/942 nt)	insertion	insertion cuts off last 89 bp (29aa) of gene	coding	pseudogene fragment		LOF	NO		100	No
S02	5FU	M9	--	--	--	--	--	--	--	--	--	--
S02	5FU	M9	upp	47	New Junction with IS1 transposase B/ pseudogene, interrupted by IS1E (insB1/yrhA)	coding (547/627 nt)	insertion		coding	uracil phosphoribosyltransferase		LOF	YES	poor-FUDR, rich-5FU	95.9
S02	5FU	M9	upp	37	New Junction with pseudogene, interupted by IS1E/IS1 repressor TnpA (yrhA/insA)	coding (539/627 nt)	insertion		coding	uracil phosphoribosyltransferase		LOF	YES	poor-FUDR, rich-5FU	88.1
S03	5FU	M9	yggF	74	G→T	S280R (AGC→AGA)	base substitution	Amino acid change in non active region	coding	fructose 1,6 bisphosphatase isozyme		MODIFICATION	NO	rich-5FU, rich-FUDR
S03	5FU	M9	upp	60	New Junction with IS1 transposase B/ pseudogene, interrupted by IS1E (insB1/yrhA)	coding (624/627 nt)	insertion		coding	uracil phosphoribosyltransferase		LOF	YES	poor-FUDR, rich-5FU	95.2
S03	5FU	M9	upp	61	New Junction with pseudogene, interupted by IS1E/IS1 repressor TnpA (yrhA/insA)	coding (616/627 nt)	insertion		coding	uracil phosphoribosyltransferase		LOF	YES	poor-FUDR, rich-5FU	98.4
S04	5FU	M9	rph	59	Δ82 bp		deletion	deletion of pyrE and rph promoter plus beginning of rph	coding	[rph], [rph]	deletion disrupted pyrE promoter region	LOF	YES	poor-FUDR, rich-5FU	100	No
S04	5FU	M9	pyrE	59	Δ82 bp		deletion	deletion of pyrE and rph promoter plus beginning of rph	coding	[rph], [rph]	deletion disrupted pyrE promoter region	MODIFICATION	NO		100	Yes;Up
S04	5FU	M9	upp	49	New Junction with repeat reagion (IS1)	coding (565/627 nt)	insertion		coding	uracil phosphoribosyltransferase		LOF	YES	poor-FUDR, rich-5FU	98	Yes;Down
S04	5FU	M9	upp	48	New Junction with pseudogene, interrupted by IS1E/IS1 repressor TnpA (yrhA/insA)	coding (573/627 nt)	insertion		coding	uracil phosphoribosyltransferase		LOF	YES	poor-FUDR, rich-5FU	92.4	Yes;Down
S05	FUDR	M9	yceA	7	T→A	D347E (GAT→GAA)	base substitution	Amino acid change in non active region 4th from last AA	coding	putative rhodanese‑related sulfurtransferase		MODIFICATION	NO		100
S05	FUDR	M9	tdk	7	Δ1 bp	coding (144/618 nt)	deletion	frame shift that causes prematuer stopcodon	coding	thymidine kinase/deoxyuridine kinase		LOF	NO	rich-5FU, rich-FUDR	100
S05	FUDR	M9	nupC	8	A→T	I105F (ATC→TTC)	base substitution	Amino acid change in helical transmembrane-region	coding	nucleoside (except guanosine) transporter		MODIFICATION	YES	rich-FUDR	100
S06	FUDR	M9	tdk	6	A→C	S128R (AGC→CGC)	base substitution		coding	thymidine kinase/deoxyuridine kinase		MODIFICATION	NO	rich-5FU, rich-FUDR	100
S06	FUDR	M9	nupC	15	G→T	G146C (GGT→TGT)	base substitution		coding	nucleoside (except guanosine) transporter		MODIFICATION	YES	rich-FUDR	100
S06	FUDR	M9	upp	9	(T)6→5	coding (439/627 nt)	deletion	fameshift causing premature stopcodon	coding	uracil phosphoribosyltransferase		LOF	YES	poor-5FU, rich-5FU	100
S07	FUDR	M9	puuA/puuD	7	A→C	intergenic (‑123/‑89)	base substitution		intergenic	glutamate‑‑putrescine ligase/gamma‑glutamyl‑gamma‑aminobutyrate hydrolase		MODIFICATION			100
S07	FUDR	M9	puuA	7	A→C	intergenic (‑123)	base substitution		intergenic	glutamate‑‑putrescine ligase		MODIFICATION	NO		100
S07	FUDR	M9	puuD	7	A→C	intergenic (‑89)	base substitution		intergenic	gamma‑glutamyl‑gamma‑aminobutyrate hydrolase		MODIFICATION	NO	rich-5FU, rich-FUDR	100
S07	FUDR	M9	pyrE/rph	8	(A)8→7	intergenic (‑40/+26)	deletion	promoter region of pyrE	intergenic	orotate phosphoribosyltransferase/ribonuclease PH (defective);enzyme; Degradation of RNA; RNase PH	In promoter region of pyrE, might be altering transcription	MODIFICATION
S07	FUDR	M9	pyrE	8	(A)8→7	intergenic (‑40)	deletion	promoter region of pyrE	intergenic	orotate phosphoribosyltransferase	In promoter region of pyrE, might be altering transcription	MODIFICATION	NO		100
S07	FUDR	M9	rph	8	(A)8→7	intergenic (+26)	deletion	promoter region of rph	intergenic	ribonuclease PH (defective);enzyme; Degradation of RNA; RNase PH	In promoter region of rph, might be altering transcription	MODIFICATION	YES	poor-5FU, rich-5FU	100
S07	FUDR	M9	rpoC	14	T→C	Y1241H (TAC→CAC)	base substitution		coding	RNA polymerase, beta prime subunit		MODIFICATION	N/A		100
S07	FUDR	M9	yjiY	32	Δ240 bp	coding (541‑780/2151 nt)	deletion		coding	putative transporter		LOF	NO	rich-5FU	100
S08	FUDR	M9	frc	33	T→A	Q250L (CAG→CTG)	base substitution	Substrate binding; Sequence Annotation Type: region of interest.	coding	formyl-CoA transferase, NAD(P)-binding	This is a amino acid change in a substrate binding site that could alter the function of the protein	LOF	NO	poor-5FU, rich-5FU	100
S08	FUDR	M9	nupC	29	(A)7→5	coding (81‑82/1203 nt)	deletion	frameshift causing premature stop codon	coding	nucleoside (except guanosine) transporter	frameshift causing premature stop codon in firth quarter of protein	LOF	YES	rich-FUDR	100
S08	FUDR	M9	bepA	44	T→A	L443H (CTC→CAC)	base substitution		coding	periplasmic metalloprotease and chaperone for OM protein maintenance and assembly		MODIFICATION	NO		97.7
S08	FUDR	M9	upp/purM	37	A→T	intergenic (‑43/‑282)	base substitution	base pair subsitution that possible alters promoter region of upp	intergenic	uracil phosphoribosyltransferase/phosphoribosylaminoimidazolesynthetase	base pair change 43 bp upstream of upp and ~282 bp upstream of purM most likely to alter upp expression	MODIFICATION
S08	FUDR	M9	upp	37	A→T	intergenic (‑43/‑282)	base substitution	base pair subsitution that possible alters promoter region of upp	intergenic	uracil phosphoribosyltransferase	base pair change 43 bp upstream of upp and ~282 bp upstream of purM most likely to alter upp expression	MODIFICATION	YES	poor-5FU, rich-5FU	100
S08	FUDR	M9	purM	37	A→T	intergenic (‑43/‑282)	base substitution	base pair subsitution that is less likely to alter promoter region of purM	intergenic	phosphoribosylaminoimidazolesynthetase	base pair change 43 bp upstream of upp and ~282 bp upstream of purM most likely to alter upp expression	MODIFICATION	NO	rich-5FU	100
S08	FUDR	M9	[yggX]-[yghJ]	49	Δ13,098 bp	large deletion	deletion		coding	[yggX], mltC, nupG, speC, yqgA, pheV, yghD, yghE, yghF, yghG, pppA, [yghJ]		LOF
S08	FUDR	M9	yggX	49	Δ13,098 bp	large deletion	deletion		coding	[yggX], mltC, nupG, speC, yqgA, pheV, yghD, yghE, yghF, yghG, pppA, [yghJ]		LOF	NO		100
S08	FUDR	M9	mltC	49	Δ13,098 bp	large deletion	deletion		coding	[yggX], mltC, nupG, speC, yqgA, pheV, yghD, yghE, yghF, yghG, pppA, [yghJ]		LOF	NO	rich-5FU	100
S08	FUDR	M9	nupG	49	Δ13,098 bp	large deletion	deletion		coding	[yggX], mltC, nupG, speC, yqgA, pheV, yghD, yghE, yghF, yghG, pppA, [yghJ]		LOF	NO		100
S08	FUDR	M9	speC	49	Δ13,098 bp	large deletion	deletion		coding	[yggX], mltC, nupG, speC, yqgA, pheV, yghD, yghE, yghF, yghG, pppA, [yghJ]		LOF	N/A		100
S08	FUDR	M9	yqgA	49	Δ13,098 bp	large deletion	deletion		coding	[yggX], mltC, nupG, speC, yqgA, pheV, yghD, yghE, yghF, yghG, pppA, [yghJ]		LOF	NO		100
S08	FUDR	M9	pheV	49	Δ13,098 bp	large deletion	deletion		coding	[yggX], mltC, nupG, speC, yqgA, pheV, yghD, yghE, yghF, yghG, pppA, [yghJ]		LOF	N/A		100
S08	FUDR	M9	yghD	49	Δ13,098 bp	large deletion	deletion		coding	[yggX], mltC, nupG, speC, yqgA, pheV, yghD, yghE, yghF, yghG, pppA, [yghJ]		LOF	NO	rich-5FU	100
S08	FUDR	M9	yghE	49	Δ13,098 bp	large deletion	deletion		coding	[yggX], mltC, nupG, speC, yqgA, pheV, yghD, yghE, yghF, yghG, pppA, [yghJ]		LOF	NO		100
S08	FUDR	M9	yghF	49	Δ13,098 bp	large deletion	deletion		coding	[yggX], mltC, nupG, speC, yqgA, pheV, yghD, yghE, yghF, yghG, pppA, [yghJ]		LOF	NO	rich-5FU	100
S08	FUDR	M9	yghG	49	Δ13,098 bp	large deletion	deletion		coding	[yggX], mltC, nupG, speC, yqgA, pheV, yghD, yghE, yghF, yghG, pppA, [yghJ]		LOF	NO		100
S08	FUDR	M9	pppA	49	Δ13,098 bp	large deletion	deletion		coding	[yggX], mltC, nupG, speC, yqgA, pheV, yghD, yghE, yghF, yghG, pppA, [yghJ]		LOF	NO		100
S08	FUDR	M9	yghJ	49	Δ13,098 bp	large deletion	deletion		coding	[yggX], mltC, nupG, speC, yqgA, pheV, yghD, yghE, yghF, yghG, pppA, [yghJ]		LOF	NO	rich-5FU	100
S09	FUDR	LB	pyrH	31	T→G	D174E (GAT→GAG)	base substitution		coding	uridylate kinase		MODIFICATION	N/A	rich-5FU	100
S09	FUDR	LB	arcB	12	G→A	A69V (GCG→GTG)	base substitution		coding	aerobic respiration control sensor histidine protein kinase, cognate to two‑component response regulators ArcA and RssB		MODIFICATION	NO		100
S09	FUDR	LB	dnaA/rpmH	12	T→C	intergenic (‑158/‑449)	base substitution		intergenic	chromosomal replication initiator protein DnaA, DNA‑binding transcriptional dual regulator/50S ribosomal subunit protein L34		MODIFICATION
S09	FUDR	LB	dnaA	12	T→C	intergenic (‑158)	base substitution		intergenic	chromosomal replication initiator protein DnaA, DNA‑binding transcriptional dual regulator		MODIFICATION	N/A		100
S09	FUDR	LB	rpmH	12	T→C	intergenic (‑449)	base substitution		intergenic	50S ribosomal subunit protein L34		MODIFICATION	N/A		100
S09	FUDR	LB	fimE	11	C→A	R90S (CGT→AGT)	base substitution		coding	tyrosine recombinase/inversion of on/off regulator of fimA		MODIFICATION	YES	rich-5FU	100
S09	FUDR	LB	htrE	18	New Junction with IS2 transposase TnP/pseudogene, interrupted by IS2A, acetyltransferase homolog; nonfunctional; interrupted by IS2; putative transferase (insD1/yaiX)	coding (775/2598 nt)	insertion		coding	putative outer membrane usher protein		LOF	N/A		94.8
S09	FUDR	LB	htrE	16	New Junction with pseudogene, interrupted by IS2A, acetyltransferase homolog; nonfunctional; interrupted by IS2; putative transferase/IS2 repressor TnpA (yaiX/insC1)	coding (775/2598 nt)	insertion		coding	putative outer membrane usher protein		LOF	N/A		88.9
S09	FUDR	LB	fimE/fimA	16	New Junction of fimE/fimA	intergenic			intergenic					rich-5FU
S09	FUDR	LB	fimE/fimA	16		intergenic (+49/-433)	?		intergenic fimA	tyrosine recombinase/inversion of on/off regulator of fimA/major type 1 subunit fimbrin (pilin)		MODIFICATION ?	YES	rich-5FU	97
S09	FUDR	LB	fimE/fimA	16		intergenic (+363/-119)	?		Intergenic fimA	tyrosine recombinase/inversion of on/off regulator of fimA/major type 1 subunit fimbrin (pilin)		MODIFICATION ?	YES	rich-5FU	97
S09	FUDR	LB	fimE/fimA	13	New Junction	intergenic			intergenic					rich-5FU
S09	FUDR	LB	fimE/fimA	13		intergenic (+57/-425)	?		intergenic fimA	tyrosine recombinase/inversion of on/off regulator of fimA/major type 1 subunit fimbrin (pilin)		MODIFICATION ?	YES	rich-5FU	96.3
S09	FUDR	LB	fimE/fimA	13		intergenic (+353/-129)	?		Intergenic fimA	tyrosine recombinase/inversion of on/off regulator of fimA/major type 1 subunit fimbrin (pilin)		MODIFICATION ?	YES	rich-5FU	96.3
S10	FUDR	LB	mngB/cydA	32	IS5 (+) +4 bp	ntergenic (+695/‑149)	insertion	transposable element	intergenic	alpha‑mannosidase/cytochrome d terminal oxidase, subunit I		MODIFICATION
S10	FUDR	LB	mngB	32	IS5 (+) +4 bp	ntergenic (+695)	insertion	transposable element	intergenic	alpha‑mannosidase		MODIFICATION - not	NO		100
S10	FUDR	LB	cydA	32	IS5 (+) +4 bp	ntergenic (‑149)	insertion	transposable element	intergenic/promoter	cytochrome d terminal oxidase, subunit I		MODIFICATION	YES (cydB)		100
S10	FUDR	LB	dnaA/rpmH	32	A→G	intergenic (‑157/‑450)	base substitution		intergenic	chromosomal replication initiator protein DnaA, DNA‑binding transcriptional dual regulator/50S ribosomal subunit protein L34		MODIFICATION
S10	FUDR	LB	dnaA	32	A→G	intergenic (‑157)	base substitution		intergenic/promoter	chromosomal replication initiator protein DnaA, DNA‑binding transcriptional dual regulator		MODIFICATION	N/A		100
S10	FUDR	LB	rpmH	32	A→G	intergenic (‑450)	base substitution		intergenic	50S ribosomal subunit protein L34	upstream of promoter	MODIFICATION	N/A		100
S10	FUDR	LB	fimE	52	New Junction with pseudogene, interrupted by IS1E/IS1 repressor TnpA (yrhA/insA)	coding (421/597 nt)	insertion		coding	tyrosine recombinase/inversion of on/off regulator of fimA		LOF	YES	rich-5FU	92.9
S10	FUDR	LB	fimE	35	New Junction with IS1 transposase B/pseudogene, interrupted by IS1E (insB1/yrhA)	coding (429/597 nt)	insertion		coding	tyrosine recombinase/inversion of on/off regulator of fimA		LOF	YES	rich-5FU	97.2
S10	FUDR	LB	fimE/fimA	22	New Junction of fimE/fimA	intergenic			intergenic					rich-5FU
S10	FUDR	LB	fimE/fimA	22		intergenic (+49/-433)	?		intergenic fimA	tyrosine recombinase/inversion of on/off regulator of fimA/major type 1 subunit fimbrin (pilin)		MODIFICATION ?	YES	rich-5FU	88.3
S10	FUDR	LB	fimE/fimA	22		intergenic (+363/-119)	?		Intergenic fimA	tyrosine recombinase/inversion of on/off regulator of fimA/major type 1 subunit fimbrin (pilin)		MODIFICATION ?	YES	rich-5FU	88.3
S10	FUDR	LB	fimE/fimA	25	New Junction	intergenic			intergenic					rich-5FU
S10	FUDR	LB	fimE/fimA	25		intergenic (+57/-425)	?		intergenic fimA	tyrosine recombinase/inversion of on/off regulator of fimA/major type 1 subunit fimbrin (pilin)		MODIFICATION ?	YES	rich-5FU	89.6
S10	FUDR	LB	fimE/fimA	25		intergenic (+353/-129)	?		Intergenic fimA	tyrosine recombinase/inversion of on/off regulator of fimA/major type 1 subunit fimbrin (pilin)		MODIFICATION ?	YES	rich-5FU	89.6
S11	FUDR	LB	pyrH	11	G→A	E235K (GAA→AAA)	base substitution		coding	uridylate kinase		MODIFICATION	N/A	rich-5FU	100
S11	FUDR	LB	tdk	20	IS1 (+) +9 bp	coding (254‑262/618 nt)	insertion	new junction in middle of gene	coding	thymidine kinase/deoxyuridine kinase	new junction causing LOF	LOF	YES	rich-5FU	100
S11	FUDR	LB	pta	21	Δ26 bp	coding (816‑841/2145 nt)	deletion	deletion in middle of gene	coding	phosphate acetyltransferase	deletion causing premature stopcodon	LOF	YES		100
S11	FUDR	LB	rrsC	18	C→A	noncoding (1539/1542 nt)	base substitution		non-coding	16S ribosomal RNA of rrnC operon	basepare change in the 4th from the last nucleotide in this operon	MODIFICATION	N/A		100
S11	FUDR	LB	fimE/fimA	8	New Junction	intergenic			intergenic					rich-5FU
S11	FUDR	LB	fimE/fimA	8		intergenic (+57/-425)	?		intergenic fimA	tyrosine recombinase/inversion of on/off regulator of fimA/major type 1 subunit fimbrin (pilin)		MODIFICATION ?	YES	rich-5FU	80.5
S11	FUDR	LB	fimE/fimA	8		intergenic (+353/-129)	?		Intergenic fimA	tyrosine recombinase/inversion of on/off regulator of fimA/major type 1 subunit fimbrin (pilin)		MODIFICATION ?	YES	rich-5FU	80.5
S12	FUDR	LB	tdk	39	New Junction with repeat region (IS1)	coding(254/618 nt)	insertion		coding	thymidine kinase/deoxyuridine kinase		LOF	YES	rich-5FU	70.9
S12	FUDR	LB	tdk	38	New Junction with repeat region (IS1)	coding(262/618 nt)	insertion		coding	thymidine kinase/deoxyuridine kinase		LOF	YES	rich-5FU	69.1
S12	FUDR	LB	cydA	132	Δ1 bp	coding (1486/1569 nt)	deletion	frame shift resulting it a disruption of the last 27 amino acids; last 27 aa have no specific function annotated	coding	cytochrome d terminal oxidase, subunit I		LOF	YES (cydB)		62.1
S12	FUDR	LB	sspA	143	A→C	T61P (ACC→CCC)	base substitution		coding	stringent starvation protein A, phage P1 late gene activator, RNAP-associated acid-resistance protein, inactive glutathione S-transferase homolog		MODIFICATION	N/A		60.8
S13	5FU	LB	--	--	--	--	--	--	--	--	--	--
S13	5FU	LB	fimE	141	New Junction with pseudogene, interrupted by IS1E/IS1 repressor TnpA (yrhA/insA)	coding (201/597 nt)	insertion		coding	tyrosine recombinase/inversion of on/off regulator of fimA		LOF	YES	rich-5FU	76.2
S13	5FU	LB	creC	231	New Junction with IS1 transposase B/pseudogene, interrupted by IS1E (insB1/yrhA)	coding (269/1425 nt)	insertion		coding	sensory histidine kinase in two-component regulatory system with CreB or PhoB, regulator of the CreBC regulon		LOF	N/A		78.3
S14	5FU	LB	--	--	--	--	--	--	--	--	--	--
S14	5FU	LB	fimE	152	New Junction with pseudogene, interrrupted by IS1E/IS1 repressor TnpA (yrhA/insA)	coding (201/597 nt)	insertion		coding	tyrosine recombinase/inversion of on/off regulator of fimA		LOF	YES	rich-5FU	76.2
S14	5FU	LB	rob	203	IS1	coding (738/870 nt)	insertion		coding	right oriC-binding transcriptional activator, AraC family		LOF	N/A		75.5
S15	5FU	LB	pyrH	11	C→T	R11C (CGC→TGC)	base substitution		coding	uridylate kinase		MODIFICATION	N/A	rich-FUDR	100	No
S15	5FU	LB	deoR	8	A→G	M220T (ATG→ACG)	base substitution		coding	deoxyribose‑5‑phosphate‑inducible deoxyribose operon transcriptional repressor; repressor of nupG and tsx		MODIFICATION	YES	poor-FUDR, rich-FUDR	100	No
S15	5FU	LB	[yhiS]-[yhiD]	15	Δ2,155 bp	IS5‑mediated	deletion		coding	[yhiS], slp, dctR, [yhiD]		LOF			100	No
S15	5FU	LB	yhiS	15	Δ2,155 bp	IS5‑mediated	deletion		coding	[yhiS], slp, dctR, [yhiD]		LOF	NO		100	No
S15	5FU	LB	slp	15	Δ2,155 bp	IS5‑mediated	deletion		coding	[yhiS], slp, dctR, [yhiD]		LOF	NO		100	Yes;Down
S15	5FU	LB	dctR	15	Δ2,155 bp	IS5‑mediated	deletion		coding	[yhiS], slp, dctR, [yhiD]		LOF	YES	rich-FUDR	100	Yes;Down
S15	5FU	LB	yhiD	15	Δ2,155 bp	IS5‑mediated	deletion		coding	[yhiS], slp, dctR, [yhiD]		LOF	YES		100	No
S15	5FU	LB	frwD	17	Δ2 bp	coding (63‑64/342 nt)	deletion	frameshift causing premature stopcodon	coding	putative enzyme IIB component of PTS	deletion causes a prematurer stop codon in first half of protein	LOF	NO		100	No
S15	5FU	LB	fimE	14	IS5 (–) +4 bp	coding (272‑275/597 nt)	insertion	new junction in middle of gene	coding	tyrosine recombinase/inversion of on/off regulator of fimA	new junction in middle of gene	LOF	YES	rich-FUDR	100	No
S16	5FU	LB	pyrH	63	T→A	L89Q (CTG→CAG)	base substitution		coding	uridylate kinase		MODIFICATION	N/A	rich-FUDR	96.8	No
S16	5FU	LB	lpxD/fabZ	58	Δ1 bp	intergenic (+95/‑10)	deletion		intergenic	UDP‑3‑O‑(3‑hydroxymyristoyl)‑glucosamine N‑acyltransferase/(3R)‑hydroxymyristol acyl carrier protein dehydratase		MODIFICATION
S16	5FU	LB	lpxD	58	Δ1 bp	intergenic (+95)	deletion		intergenic	UDP‑3‑O‑(3‑hydroxymyristoyl)‑glucosamine N‑acyltransferase		MODIFICATION	YES	poor-5FU, rich-FUDR	100	No
S16	5FU	LB	fabZ	58	Δ1 bp	intergenic (‑10)	deletion		intergenic/promoterr	(3R)‑hydroxymyristol acyl carrier protein dehydratase		MODIFICATION	N/A		100	Yes;Down
S16	5FU	LB	lpxD/fabZ	56	G→A	intergenic (+98/‑7)	base substitution		intergenic	UDP‑3‑O‑(3‑hydroxymyristoyl)‑glucosamine N‑acyltransferase/(3R)‑hydroxymyristol acyl carrier protein dehydratase		MODIFICATION
S16	5FU	LB	lpxD	56	G→A	intergenic (+98)	base substitution		intergenic	UDP‑3‑O‑(3‑hydroxymyristoyl)‑glucosamine N‑acyltransferase		MODIFICATION	YES	poor-5FU, rich-FUDR	100	No
S16	5FU	LB	fabZ	56	G→A	intergenic (‑7)	base substitution		intergenic/promoter	(3R)‑hydroxymyristol acyl carrier protein dehydratase		MODIFICATION	N/A		100	Yes;Down
S16	5FU	LB	rluF	42	C→T	T146T (ACC→ACT)	base substitution		coding	23S rRNA pseudouridine(2604) synthase		MODIFICATION	YES		100	No
S16	5FU	LB	fimE	47	New Junction with repeat region (IS1)	coding (516/597 nt)	insertion		coding	tyrosine recombinase/inversion of on/off regulator of fimA		LOF	YES	rich-FUDR	100	Yes;Up
S16	5FU	LB	fimE	61	New Junction with pseudogene, interrupted by IS1E/IS1 repressor TnpA (yrhA/insA)	coding (508/597 nt)	insertion		coding	tyrosine recombinase/inversion of on/off regulator of fimA		LOF	YES	rich-FUDR	95.3	Yes;Up
S16	5FU	LB	fimE/fimA	31	New Junction of fimE/fimA	intergenic			intergenic					rich-FUDR
S16	5FU	LB	fimE/fimA	31		intergenic (+49/-433)	?		intergenic fimA	tyrosine recombinase/inversion of on/off regulator of fimA/major type 1 subunit fimbrin (pilin)		MODIFICATION ?	YES	rich-FUDR	100
S16	5FU	LB	fimE/fimA	31		intergenic (+363/-119)	?		Intergenic fimA	tyrosine recombinase/inversion of on/off regulator of fimA/major type 1 subunit fimbrin (pilin)		MODIFICATION ?	YES	rich-FUDR	100
S16	5FU	LB	fimE/fimA	36	New Junction of fimE/fimA	intergenic			intergenic					rich-FUDR
S16	5FU	LB	fimE/fimA	36		intergenic (+57/-425)	?		intergenic fimA	tyrosine recombinase/inversion of on/off regulator of fimA/major type 1 subunit fimbrin (pilin)		MODIFICATION ?	YES	rich-FUDR	100
S16	5FU	LB	fimE/fimA	36		intergenic (+353/-129)	?		Intergenic fimA	tyrosine recombinase/inversion of on/off regulator of fimA/major type 1 subunit fimbrin (pilin)		MODIFICATION ?	YES	rich-FUDR	100

## Sheet: Gene Hit Counts
				Genes
ID	Drug	Media		flk	upp	rph	pyrE	yjgX	yggF	yceA	tdk	nupC	puuA	puuD	rpoC	yjiY	frc	bepA	purM	yggX	mltC	nupG	speC	yqgA	pheV	yghD	yghE	yghF	yghG	pppA	yghJ	pyrH	arcB	dnaA	rpmH	fimE	htrE	mngB	cydA	pta	rrsC	sspA	creC	rob	deoR	yhiS	slp	dctR	yhiD
S01	5FU	M9		1	1	1	1	1
S02	5FU	M9			2
S03	5FU	M9			2				1
S04	5FU	M9			2	1	1
S05	FUDR	M9								1	1	1
S06	FUDR	M9			1						1	1
S07	FUDR	M9				1	1						1	1	1	1
S08	FUDR	M9			1							1					1	1	1	1	1	1	1	1	1	1	1	1	1	1	1
S09	FUDR	LB																														1	1	1	1	1	1
S10	FUDR	LB																																1	1	2		1	1
S11	FUDR	LB									1																					1								1	1
S12	FUDR	LB									2																												1			1
S13	5FU	LB																																		1							1
S14	5FU	LB																																		1								1
S15	5FU	LB																														1				1									1	1	1	1	1
S16	5FU	LB																														1				2
	83	Overall hits		1	9	3	3	1	1	1	5	3	1	1	1	1	1	1	1	1	1	1	1	1	1	1	1	1	1	1	1	4	1	2	2	8	1	1	2	1	1	1	1	1	1	1	1	1	1
	34	5FU hits		1	7	2	2	1	1	0	0	0	0	0	0	0	0	0	0	0	0	0	0	0	0	0	0	0	0	0	0	2	0	0	0	5	0	0	0	0	0	0	1	1	1	1	1	1	1
	49	FUDR hits		0	2	1	1	0	0	1	5	3	1	1	1	1	1	1	1	1	1	1	1	1	1	1	1	1	1	1	1	2	1	2	2	3	1	1	2	1	1	1	0	0	0	0	0	0	0
	43	M9 hits		1	9	3	3	1	1	1	2	3	1	1	1	1	1	1	1	1	1	1	1	1	1	1	1	1	1	1	1	0	0	0	0	0	0	0	0	0	0	0	0	0	0	0	0	0	0
	40	LB hits		0	0	0	0	0	0	0	3	0	0	0	0	0	0	0	0	0	0	0	0	0	0	0	0	0	0	0	0	4	1	2	2	8	1	1	2	1	1	1	1	1	1	1	1	1	1
Indicates LOF mutation
[truncated: 4 more columns]

## Sheet: Validation-OD
	poor-5FU	poor-FUDR	rich-5FU	rich-FUDR
'arcB'	0.19045	0.18785	0.14315	0.30855
'bepA'	0.19525	0.19545	0.25655	0.3707
'cydA'	0.22185	0.1953	0.2328	0.594
'dctR'	0.134	0.1367	0.35545	0.6127
'deoR'	0.2408	0.26845	0.6244	0.9247
'fimE'	0.1583	0.14265	0.4326	0.6289
'flk'	0.22255	0.2281	0.40405	0.54665
'frc'	0.25235	0.21565	0.33255	0.5353
'frwD'	0.19015	0.2079	0.20695	0.2658
'lpxD'	0.3423	0.255	0.3116	0.64825
'mltC'	0.16425	0.19255	0.351275	0.425
'mngB'	0.17135	0.0888	0.23945	0.3955
'nupC'	0.1133	0.334	0.1276	0.71185
'nupG'	0.16565	0.20375	0.19615	0.35255
'pppA'	0.213	0.1813	0.2406	0.44585
'pta'	0.1766	0.13455	0.26675	0.66965
'purM'	0.0299	0.03125	0.35395	0.32335
'puuA'	0.11645	0.1835	0.25495	0.40335
'puuD'	0.1001	0.127	0.41995	0.93345
'pyrE'	0.1029	0.1508	0.1449	0.15835
'rluF'	0.1856	0.17505	0.29995	0.4855
'rph'	0.2869	0.3607	0.39125	0.5044
'slp'	0.169	0.1578	0.24925	0.3354
'tdk'	0.1798	0.182	0.3599	0.9364
'upp'	0.91895	0.8889	0.32015	0.4241
'yceA'	0.2435	0.20385	0.21705	0.23705
'yggF'	0.164	0.2166	0.33405	0.64225
'yggX'	0.1032	0.13365	0.20245	0.296
'yghD'	0.1463	0.1656	0.30265	0.4615
'yghE'	0.133	0.1927	0.26385	0.3835
'yghF'	0.1662	0.20185	0.3432	0.4549
'yghG'	0.1509	0.1748	0.2654	0.41755
'yghJ'	0.2048	0.2295	0.327525	0.3658
'yhiD'	0.18485	0.1875	0.2895	0.406
'yhiS'	0.13895	0.18715	0.27175	0.40615
'yjgX'	0.13545	0.20005	0.23105	0.3265
'yjiY'	0.17115	0.20385	0.30235	0.31035
'yqgA'	0.14785	0.17405	0.26395	0.48495
Ancestor	0.206788	0.229306	0.257381	0.444656

## Sheet: Validation-pval
	poor-5FU	poor-FUDR	rich-5FU	rich-FUDR
'arcB'	0.777177	0.992948	1	0.986941
'bepA'	0.705683	0.977676	0.530304	0.899216
'cydA'	0.23989	0.980739	0.97847	0.00809757
'dctR'	0.998494	0.999993	4.88264e-08	0.00402588
'deoR'	0.0626012	0.0102254	1.11273e-16	9.98946e-08
'fimE'	0.983145	0.99998	1.27115e-11	0.00226003
'flk'	0.235066	0.525743	1.77374e-10	0.0424829
'frc'	0.0236992	0.796757	1.46217e-06	0.0612649
'frwD'	0.782039	0.911389	0.999789	0.997322
'lpxD'	4.51481e-06	0.0560901	5.84042e-05	0.0010446
'mltC'	0.993389	0.998307	3.78286e-10	0.686887
'mngB'	0.945154	1	0.942951	0.80544
'nupC'	0.999814	1.59052e-06	1	9.57672e-05
'nupG'	0.9671	0.942163	0.999984	0.941697
'pppA'	0.386332	0.996415	0.925093	0.491735
'pta'	0.916479	0.999995	0.199461	0.000472213
'purM'	1	1	6.65002e-08	0.977818
'puuA'	0.999741	0.996011	0.582842	0.765393
'puuD'	0.999948	0.999998	1.61562e-10	7.90218e-08
'pyrE'	0.999933	0.999959	1	0.999952
'rluF'	0.835451	0.998821	0.000550284	0.237337
'rph'	0.000796401	3.51641e-07	1.01494e-09	0.151781
'slp'	0.954378	0.999847	0.76662	0.966391
'tdk'	0.893342	0.996908	3.55717e-08	7.23509e-08
'upp'	1.18637e-16	2.16101e-18	1.29891e-05	0.64197
'yceA'	0.0544109	0.923112	0.99913	0.999101
'yggF'	0.971161	0.790514	1.16867e-06	0.00132407
'yggX'	0.999931	0.999995	0.999941	0.991725
'yghD'	0.994764	0.99969	0.000369097	0.384976
'yghE'	0.998634	0.986275	0.280443	0.85323
'yghF'	0.964808	0.953944	9.98467e-07	0.428802
'yghG'	0.991814	0.998877	0.239178	0.683363
'yghJ'	0.546489	0.492945	5.46776e-08	0.969205
'yhiD'	0.845005	0.993202	0.00905329	0.745089
'yhiS'	0.997537	0.993593	0.116669	0.749678
'yjgX'	0.99825	0.963435	0.984518	0.974963
'yjiY'	0.945675	0.945326	0.00125523	0.985273
'yqgA'	0.993852	0.998991	0.278851	0.240624

## Sheet: Validated Hit Counts
	Number of strains from evolved condition with gene mutated (max 4)				LOF give resistance in condition mutation appeared in	LOF give resistance in any condition	Geen indicates validated				Green indicates evolved strain(s) had LOF mutation AND this LOF was validated to give resistance
							Underlined indicates condition mutation was seen in				Number of strains with gene mutation were LOF
Gene	poor-5FU	poor-FUDR	rich-5FU	rich-FUDR	Validated in Evo	Validated in Any	poor-5FU	poor-FUDR	rich-5FU	rich-FUDR	poor-5FU LOF	poor-FUDR LOF	rich-5FU LOF	rich-FUDR LOF
upp	4	2	0	0	Yes	Yes	Yes	Yes	Yes	No	3	1	0	0
rph	2	1	0	0	Yes	Yes	Yes	Yes	Yes	No	2	0	0	0
nupC	0	3	0	0	Yes	Yes	No	Yes	No	Yes	0	1	0	0
fimE	0	0	4	2	Yes	Yes	No	No	Yes	Yes	0	0	4	1
cydA	0	0	0	2	Yes	Yes	No	No	No	Yes	0	0	0	1
pta	0	0	0	1	Yes	Yes	No	No	No	Yes	0	0	0	1
deoR	0	0	1	0	Yes	Yes	No	Yes	Yes	Yes	0	0	0	0
dctR	0	0	1	0	Yes	Yes	No	No	Yes	Yes	0	0	1	0
yhiD	0	0	1	0	Yes	Yes	No	No	Yes	No	0	0	1	0
lpxD	0	0	1	0	Yes	Yes	Yes	No	Yes	Yes	0	0	0	0
rluF	0	0	1	0	Yes	Yes	No	No	Yes	No	0	0	0	0
tdk	0	2	0	2	Some	Yes	No	No	Yes	Yes	0	1	0	2
flk	1	0	0	0	No	Yes	No	No	Yes	Yes	1	0	0	0
yggF	1	0	0	0	No	Yes	No	No	Yes	Yes	0	0	0	0
puuD	0	1	0	0	No	Yes	No	No	Yes	Yes	0	0	0	0
yjiY	0	1	0	0	No	Yes	No	No	Yes	No	0	1	0	0
frc	0	1	0	0	No	Yes	Yes	No	Yes	No	0	1	0	0
purM	0	1	0	0	No	Yes	No	No	Yes	No	0	0	0	0
mltC	0	1	0	0	No	Yes	No	No	Yes	No	0	1	0	0
yghD	0	1	0	0	No	Yes	No	No	Yes	No	0	1	0	0
yghF	0	1	0	0	No	Yes	No	No	Yes	No	0	1	0	0
yghJ	0	1	0	0	No	Yes	No	No	Yes	No	0	1	0	0
pyrE	2	1	0	0	No	No	No	No	No	No	0	0	0	0
yjgX	1	0	0	0	No	No	No	No	No	No	1	0	0	0
yceA	0	1	0	0	No	No	No	No	No	No	0	0	0	0
puuA	0	1	0	0	No	No	No	No	No	No	0	0	0	0
bepA	0	1	0	0	No	No	No	No	No	No	0	0	0	0
yggX	0	1	0	0	No	No	No	No	No	No	0	1	0	0
nupG	0	1	0	0	No	No	No	No	No	No	0	1	0	0
yqgA	0	1	0	0	No	No	No	No	No	No	0	1	0	0
yghE	0	1	0	0	No	No	No	No	No	No	0	1	0	0
yghG	0	1	0	0	No	No	No	No	No	No	0	1	0	0
pppA	0	1	0	0	No	No	No	No	No	No	0	1	0	0
arcB	0	0	0	1	No	No	No	No	No	No	0	0	0	0
mngB	0	0	0	1	No	No	No	No	No	No	0	0	0	0
yhiS	0	0	1	0	No	No	No	No	No	No	0	0	1	0
slp	0	0	1	0	No	No	No	No	No	No	0	0	1	0
frwD	0	0	1	0	No	No	No	No	No	No	0	0	1	0
fabZ	0	0	1	0	No	No	No	No	No	No	0	0	0	0
rpoC	0	1	0	0	N/A	N/A	N/A	N/A	N/A	N/A	0	0	0	0
speC	0	1	0	0	N/A	N/A	N/A	N/A	N/A	N/A	0	1	0	0
pheV	0	1	0	0	N/A	N/A	N/A	N/A	N/A	N/A	0	1	0	0
pyrH	0	0	2	2	N/A	N/A	N/A	N/A	N/A	N/A	0	0	0	0
dnaA	0	0	0	2	N/A	N/A	N/A	N/A	N/A	N/A	0	0	0	0
rpmH	0	0	0	2	N/A	N/A	N/A	N/A	N/A	N/A	0	0	0	0
htrE	0	0	0	1	N/A	N/A	N/A	N/A	N/A	N/A	0	0	0	1
rrsC	0	0	0	1	N/A	N/A	N/A	N/A	N/A	N/A	0	0	0	0
creC	0	0	1	0	N/A	N/A	N/A	N/A	N/A	N/A	0	0	1	0
rob	0	0	1	0	N/A	N/A	N/A	N/A	N/A	N/A	0	0	1	0
