# Supplementary material for: Evolved bacterial resistance against fluoropyrimidines can lower chemotherapy impact in the Caenorhabditis elegans host
Source: eLife. 2020 Nov 30;9:e59831. doi: 10.7554/eLife.59831 (PMC7725501; doi:10.7554/eLife.59831)
Supplement: Supplementary file 6. [file elife-59831-supp6.xlsx]

## Sheet: RNAseq RPM
Gene Name	A01_ND_poor'	A01_ND_poor'	A01_ND_poor'	S01_5FU_poor'	S01_5FU_poor'	S01_5FU_poor'	S04_5FU_poor'	S04_5FU_poor'	S04_5FU_poor'	A01_ND_rich'	A01_ND_rich'	A01_ND_rich'	S15_5FU_rich'	S15_5FU_rich'	S15_5FU_rich'	S16_5FU_rich'	S16_5FU_rich'	S16_5FU_rich'
'thrL'	105.972	117.404	109.899	147.904	129.681	142.789	119.712	104.846	120.252	25.3423	26.1278	39.0492	28.8832	25.7516	29.4136	22.2884	17.4257	24.0379
'thrA'	583.988	593.759	570.029	537.662	526.663	486.228	495.975	496.061	522.048	313.854	299.38	434.521	136.555	120.619	130.067	186.931	146.229	226.261
'thrB'	233.896	241.198	224.776	217.005	206.401	179.238	199.942	205.199	204.584	245.098	229.041	261.573	144.824	135.621	147.48	179.302	186.486	202.684
'thrC'	312.322	332.95	319.49	305.511	283.809	259.226	269.08	287.268	281.92	341.357	326.415	373.231	184.946	186.76	237.897	310.777	294.977	335.101
'yaaX'	11.367	9.45532	10.3924	10.1758	10.5045	11.6723	9.82755	10.6748	10.8695	19.4414	19.7168	17.374	10.3653	10.3857	11.0595	13.3996	11.3372	12.688
'yaaA'	79.3887	89.3878	85.131	84.2463	82.5354	82.6373	84.425	84.7642	81.9585	99.6831	94.4712	105.942	100.858	89.2802	83.3582	86.1022	75.5813	82.218
'yaaJ'	65.2551	60.1463	60.7367	54.7838	61.7765	59.8655	64.655	61.8293	59.0326	125.763	131.969	121.222	123.103	128.576	150.774	209.551	207.324	196.871
'talB'	1603.65	1607.23	1603.05	1682.2	1603.25	1647.95	1627.18	1695.97	1617.12	2495.29	2606.18	2565.64	2668.73	2655.08	2397.15	2919.91	2702.03	2850.41
'mog'	60.5639	61.7222	60.0522	65.4329	59.2129	61.8705	65.1147	65.3699	66.0291	99.4197	88.6045	91.6806	134.982	138.172	114.89	123.183	126.494	112.346
'satP'	32.9583	30.292	30.4928	29.2259	28.6373	31.5798	29.77	28.8537	27.4236	22.6026	19.7168	21.3356	30.0479	28.5454	27.2958	27.8605	27.7131	25.2375
'yaaW'	5.47301	5.07786	4.91619	5.20623	4.50193	4.94105	5.1724	4.1748	4.06045	3.26657	3.56837	4.35766	3.31924	2.42939	4.29439	5.63844	4.72383	4.29084
'yaaI'	2.70643	3.93972	3.73381	2.60312	2.87623	3.29403	2.47126	3.17073	2.87355	2.00209	2.96356	2.49009	1.74697	1.94351	2.5884	2.25537	2.20445	2.81442
'dnaK'	2027.84	1935.71	1919.37	1918.26	1804.09	1694.49	1507.64	1479.46	1458.39	13858.5	13848.4	15684.4	1492.49	1513.21	7007.15	6832.66	4861.24	14191.4
'dnaJ'	281.168	220.274	259.438	249.189	255.359	223.851	241.091	228.028	238.879	943.934	834.999	872.947	98.5873	100.577	403.437	407.626	277.131	954.735
'hokC'	0	0	0	0	0	0	0	0	0	0	0	0	0	0	0	0	0	0
'mokC'	12.1489	11.7316	12.7572	12.424	10.1919	13.5342	15.8045	12.5772	12.2438	21.7069	21.5312	18.4493	21.8953	24.1725	22.825	27.9932	27.5032	28.6979
'nhaA'	349.791	343.806	343.822	363.608	401.985	344.728	372.872	347.406	371.125	74.3935	70.5207	75.4384	65.0455	64.6826	82.2993	103.349	113.792	107.825
'nhaR'	99.1156	100.419	99.8795	108.976	102.732	108.273	102.758	106.378	105.884	25.0262	31.0872	32.3712	29.2326	27.4521	33.1786	38.076	37.7907	38.9405
'rpsT'	1054.13	1144.88	1114.42	1076.39	976.418	997.877	1070.69	1021.5	1130.49	825.389	880.481	1025.35	753.176	632.917	635.628	380.561	352.765	600.256
'yaaY'	4.45058	4.02727	4.85396	4.14132	4.93962	3.43725	4.88504	3.4878	5.12241	3.42463	3.38693	2.4335	2.91161	3.15821	4.23556	5.04142	4.88129	4.6138
'ribF'	413.783	413.145	402.007	410.227	402.86	404.164	417.7	418.167	412.166	411.061	415.322	447.65	292.617	280.048	376.024	295.454	281.173	431.621
'ileS'	1486.49	1507.25	1463.16	1536.07	1427.8	1457.39	1559.59	1623.68	1540.47	1930.6	1855.31	1950.65	1060.24	1019.07	1229.02	1307.45	1077.72	1861.81
'lspA'	178.564	178.425	168.271	187.188	171.824	161.121	195.057	196.057	196.9	264.698	251.722	234.182	132.886	122.624	125.655	150.248	145.547	206.191
'fkpB'	93.0411	93.5026	94.7144	103.651	85.9743	88.008	101.494	99.6138	98.825	100.052	101.064	96.3212	66.6177	65.2292	56.8271	70.3146	58.1031	101.411
'ispH'	182.594	180.001	172.502	183.165	169.135	169.714	184.54	188.447	195.651	192.938	185.676	187.775	107.322	114.607	119.066	129.352	114.054	204.392
'rihC'	25.5006	24.6013	27.9414	25.7945	22.8848	24.8485	25.5172	24.2561	22.6136	287.248	298.292	270.571	347.181	363.801	334.492	254.526	273.457	286.748
'dapB'	170.445	156.713	163.977	169.912	168.385	177.162	178.735	185.963	175.849	166.174	149.025	159.819	145.057	142.545	149.951	176.649	167.749	188.243
'carA'	112.588	92.2769	106.538	126.724	82.1602	85.7165	122.528	202.028	154.172	81.5589	62.2349	40.0678	39.6562	32.1894	30.4725	56.915	54.2716	45.2153
'carB'	461.056	359.039	353.094	370.944	243.104	229.723	333.792	508.902	421.849	385.403	291.276	185.625	295.179	222.168	142.48	430.445	445.982	267.785
'caiF'	41.9196	40.3602	40.6986	32.0657	35.3276	34.5157	40.1723	46.2927	36.1692	55.1102	70.6417	37.0684	89.0954	98.2689	87.6526	89.5516	96.891	43.0007
'caiE'	3.54843	5.77825	3.04928	4.37797	2.87623	3.07921	3.50574	3.80488	3.81057	4.3203	3.68934	3.50876	5.06621	4.67658	4.41204	5.50577	6.14098	4.42925
'caiD'	3.06729	3.32687	3.23597	2.72144	3.06381	2.43472	2.12643	3.64634	2.49874	2.84508	2.11683	2.20713	2.15459	1.70057	2.41192	2.71972	3.04425	3.13739
'caiC'	27.5455	26.3523	27.1946	25.5579	24.1979	24.4904	26.3218	24.7317	25.7994	12.0652	14.9388	14.5444	11.1224	10.8108	10.0006	12.4709	12.072	12.8264
'caiB'	15.2763	13.2199	13.8773	14.7904	11.755	15.7541	13.908	14.9024	15.1798	8.42986	8.58829	8.20598	8.79308	6.74156	9.23588	10.2155	8.55538	8.95078
'caiA'	37.7096	38.7843	36.4669	28.5159	31.7011	33.4416	33.3907	37.7845	32.4836	30.5056	33.8693	26.7119	36.3369	33.7078	32.1197	34.4276	36.8459	31.1432
'caiT'	3.90929	2.53893	2.6759	3.90467	3.37645	2.57794	2.81608	3.96341	3.31082	2.63433	3.68934	3.05602	1.92167	2.36866	2.70605	3.71473	2.09948	3.18353
'fixA'	2.16515	2.18873	1.86691	1.65653	0.937902	1.07414	1.66666	1.21545	1.56171	2.58165	2.47972	2.65987	3.02808	3.21894	3.11784	2.58705	3.14922	2.16849
'fixB'	2.76657	2.01363	2.17806	2.83976	1.93833	2.00506	2.29884	1.84959	1.56171	3.37194	3.62885	3.2258	2.67869	2.24719	3.35315	2.58705	2.4144	4.10629
'fixC'	2.76657	2.36383	2.80036	1.89317	1.68822	2.93599	2.47126	1.7439	2.87355	2.84508	3.50789	4.35766	2.27106	3.94776	4.35322	4.04641	3.51663	3.82946
'fixX'	0.240572	0.0875493	0.435612	0.35497	0.0625268	0	0.114942	0.317073	0	0.421493	0.362885	0.226372	0.0582323	0.182204	0.117654	0.199004	0.104974	0.138414
'yaaU'	1.50357	1.83853	2.11583	2.0115	1.93833	2.72116	2.41379	1.90244	2.06146	1.15911	1.14914	1.81098	1.39757	0.850287	1.76482	2.85238	1.94202	1.84552
'kefF'	20.4486	21.362	22.3407	22.5998	25.636	22.2705	23.6206	25.2073	21.4891	10.5373	8.58829	9.28125	10.1907	9.23169	13.5891	14.1293	12.2295	10.8886
'kefC'	94.665	87.2866	89.8604	104.48	106.858	104.621	109.08	98.3983	96.2013	41.8332	39.9174	39.1057	37.094	40.996	45.7088	62.7525	63.2993	45.9074
'folA'	56.7148	58.2203	54.5759	62.8297	61.5889	59.4358	59.7699	53.7439	61.219	40.6741	39.0707	48.387	35.6382	30.3674	30.2372	37.877	36.6884	35.4802
'apaH'	134.359	131.236	135.475	160.21	165.321	152.528	173.793	161.707	176.473	86.5641	81.8911	75.5516	65.3366	66.0187	64.357	89.2863	90.7501	92.7836
'apaG'	59.7219	60.5841	61.4835	75.372	67.8416	69.2463	78.9653	78.4227	76.024	47.7868	46.2074	44.2557	35.1141	38.2629	36.2376	49.9499	46.7659	51.3978
'rsmA'	189.691	196.548	199.946	234.399	225.659	225.283	245.287	238.862	245.688	155.426	163.359	158.574	125.141	125.357	120.302	143.415	137.411	177.078
'pdxA'	165.273	157.939	161.114	204.936	194.083	191.34	215.459	211.224	229.384	161.643	153.863	151.499	127.645	121.044	122.596	137.445	120.353	209.651
'surA'	594.994	635.52	627.156	661.665	621.641	617.989	688.848	688.419	697.959	439.617	461.167	526.258	370.474	325.235	333.492	421.357	402.051	680.352
'lptD'	1126.96	1141.2	1112.24	1114.73	1102.85	1107.65	1142.07	1134.86	1150.92	668.119	678.233	788.001	589.369	590.95	748.988	729.879	647.322	928.574
'djlA'	90.6955	93.6777	86.7489	95.842	96.4788	94.7393	99.7698	96.4959	100.574	62.0122	56.6706	60.2715	57.2423	57.3337	58.239	55.6547	57.6307	72.852
'rluA'	60.2632	62.4226	61.6702	49.1042	49.3336	45.472	51.4941	47.0325	49.2251	40.2526	44.4535	47.0854	28.6503	23.7473	16.0598	26.3348	25.1413	27.4983
'rapA'	258.133	266.938	237.906	201.268	178.326	173.581	193.907	187.496	188.842	90.1995	110.62	149.632	61.4351	48.7093	48.4148	72.8353	64.3491	120.051
'polB'	85.8841	84.1348	83.7619	91.819	86.9748	94.6677	92.0687	86.8252	95.5766	68.7034	73.0005	76.2307	69.5294	71.5456	69.1808	91.1436	88.9655	95.921
'araC'	49.1368	44.7377	47.0461	37.5085	36.203	38.9555	36.4941	41.061	32.6085	108.166	101.789	92.7559	185.528	170.968	132.95	194.095	204.175	94.1216
'yabI'	34.0409	27.9282	30.1194	27.3327	29.4501	27.4264	26.8965	26.8455	29.8599	23.4456	23.648	25.2971	37.9675	33.7078	31.8255	41.1937	41.4647	30.2204
'thiQ'	23.3355	22.8504	19.0424	24.3746	18.3203	15.9689	22.6436	21.4553	20.2398	11.2223	12.58	17.8268	10.0742	7.71332	6.76513	9.0215	7.76808	9.13533
'thiP'	35.9655	39.3096	34.5378	35.852	30.5131	30.6488	34.1953	33.7154	30.8594	11.5911	11.7938	12.9598	7.33727	6.74156	10.4124	7.4958	7.55813	9.73513
'thiB'	108.618	107.861	104.298	98.6817	90.4137	94.4528	93.0457	88.4105	91.2039	24.6573	26.6116	28.3531	23.7005	20.2854	20.2366	20.2984	19.2102	20.2546
'sgrR'	58.5792	58.4829	57.9986	52.5356	51.8972	52.4897	50.9194	52.6341	50.4745	74.3408	76.8107	73.5143	69.704	67.112	69.7691	70.5136	68.0757	70.2682
'sgrT'	10.8859	11.469	11.886	13.6072	10.9422	11.9588	12.4712	11.0976	11.3068	21.5488	17.8419	14.0351	46.8188	51.2602	44.6499	52.8023	49.1803	24.8684
'setA'	53.1062	50.7786	51.1532	44.1346	48.3332	42.7508	52.7584	51.5772	48.7253	39.1989	37.7401	36.9552	36.4534	38.0807	43.3557	31.9732	32.8569	36.4491
'leuD'	48.2346	47.8019	48.7263	46.7378	50.8968	44.6127	45.0573	47.7195	54.285	12.6448	12.1567	12.3939	8.56015	8.25993	10.883	14.2619	15.5362	13.7491
'leuC'	96.4693	91.489	89.5493	84.128	89.0381	80.3458	99.0227	86.561	104.322	18.493	16.6927	20.8262	11.2388	12.5114	13.7067	23.0844	17.3207	21.4542
'leuB'	75.4794	77.9188	79.8414	75.4904	78.7837	63.6608	85.8043	71.2886	92.7031	11.9072	12.7615	14.9405	8.73484	8.74581	11.8831	13.9303	13.2267	16.2867
'leuA'	95.1461	92.3645	89.6115	90.3991	94.6656	84.4991	104.597	82.2276	107.945	14.4361	14.0316	15.7328	11.0059	10.7501	10.9419	15.3896	13.1742	16.5174
'leuL'	39.153	47.1015	48.104	61.1732	62.0891	54.4232	60.9768	53.1626	69.7772	8.37718	10.1003	10.6961	8.61838	9.96051	11.1183	9.28683	9.97253	11.8113
'leuO'	19.5465	18.5604	18.7935	16.2103	14.4437	13.8206	13.7356	15.9065	15.0549	6.42777	8.04396	7.80983	8.50191	9.89977	10.3536	12.4046	10.2875	10.9347
'ilvI'	124.797	115.04	123.34	149.088	167.947	163.341	173.965	151.984	179.284	40.0418	40.2803	40.5206	31.9113	34.9832	42.5321	32.9019	29.7077	42.7238
'ilvH'	31.3345	32.043	30.1194	36.5619	42.2681	38.6691	41.2642	39.687	43.2906	7.85031	8.34636	8.77191	7.5702	7.95626	11.6478	9.61851	8.87031	10.9809
'cra'	273.951	272.803	268.275	241.025	230.224	238.388	278.16	285.789	278.609	476.709	481.851	410.356	551.518	563.437	480.619	494.126	525.08	610.268
'mraZ'	162.566	160.39	163.479	152.874	137.559	129.541	138.448	147.492	139.679	161.59	158.399	167.006	148.551	134.831	155.716	150.248	144.392	154.101
'rsmH'	225.596	227.453	209.903	219.017	188.456	195.494	209.425	216.561	199.212	239.672	224.505	244.651	188.556	182.265	199.248	203.382	208.636	224.831
'ftsL'	43.5435	43.5995	38.2094	37.0352	37.7662	38.3826	39.3102	39.5813	40.2296	45.1524	46.6308	45.8403	31.6201	32.068	39.2966	40.9284	39.9426	44.2003
'ftsI'	261.08	276.918	267.092	270.014	241.729	246.838	257.758	256.142	246.75	242.833	235.029	260.611	188.964	198.542	230.426	260.695	250.993	240.933
'murE'	363.744	344.857	361.122	349.172	339.52	326.181	368.907	379.589	365.815	352.79	356.958	339.388	224.311	238.202	277.606	302.618	298.809	323.012
'murF'	274.011	290.226	293.291	295.927	281.245	281.353	296.091	305.658	287.854	301.104	302.646	283.135	202.241	217.613	197.13	240.794	220.131	269.769
'mraY'	184.94	186.13	181.028	210.852	193.395	183.965	209.597	218.093	213.579	196.732	205.696	186.7	118.794	124.02	139.95	169.684	172.42	175.832
'murD'	253.442	239.622	241.08	263.388	245.355	246.694	263.677	277.545	266.303	279.292	262.548	210.526	198.572	196.963	184.188	242.652	239.866	217.126
'ftsW'	158.717	165.293	168.706	186.833	178.076	177.663	187.011	189.028	187.155	164.488	161.726	129.258	104.003	119.04	122.478	167.097	161.765	154.747
'murG'	237.384	222.638	240.644	244.93	264.426	248.27	277.873	264.439	273.986	250.367	255.895	209.79	212.955	223.14	254.075	324.641	366.307	222.385
'murC'	367.173	380.051	375.559	395.319	391.293	384.757	443.734	429.053	443.526	363.116	369.236	296.887	259.483	264.864	295.077	374.989	403.625	286.748
'ddlB'	268.779	271.578	276.489	271.789	275.618	278.704	298.505	280.874	287.355	262.327	262.729	242.897	221.749	238.02	253.016	331.341	339.224	257.266
'ftsQ'	215.252	210.906	205.671	219.372	214.592	208.741	228.275	230.248	227.635	179.135	179.084	171.137	145.581	147.768	193.424	239.733	255.507	189.028
'ftsA'	328.561	296.354	308.164	336.394	312.009	339.214	349.884	361.305	334.893	294.94	269.866	238.2	230.309	244.215	279.841	359.069	364.995	280.565
'ftsZ'	1480.66	1359.99	1428.43	1373.85	1330.38	1360.29	1447.7	1493.04	1419.97	926.653	895.601	769.212	855.723	870.269	859.231	1222.15	1244.2	761.555
'lpxC'	1404.94	1388.62	1438.27	1402.01	1294.05	1372.54	1425.28	1433.91	1456.76	1189.98	1243.49	1250.2	1130.81	1139.69	1041.07	1169.21	1123.01	1236.41
'secM'	126.36	127.822	136.72	140.213	133.495	132.835	134.08	131.744	145.052	156.69	163.238	183.022	177.783	170.422	191.012	141.359	130.063	166.143
'secA'	723.7	786.367	765.245	698.463	647.215	647.922	729.25	730.589	742.374	720.806	800.888	954.271	747.47	745.58	852.995	613.86	559.039	994.321
'mutT'	15.156	12.8697	15.3709	17.5119	17.0073	16.6134	18.5057	18.2845	21.4267	13.6985	13.4872	16.0724	13.9757	11.904	13.5891	11.9402	10.8123	20.1162
'yacG'	29.4099	32.3057	30.4928	35.0237	32.2638	33.5848	33.6206	34.6138	34.67	24.2359	22.6803	23.8256	19.042	19.4959	20.9425	20.63	20.155	26.6217
'zapD'	76.7424	78.1815	72.8716	79.5133	79.6591	75.6195	82.8158	75.6748	75.3369	55.9532	57.6383	58.0644	57.2423	51.9283	51.2974	48.0262	43.3018	56.9344
'coaE'	66.0971	59.0082	59.3054	66.7344	62.9019	62.3002	63.2182	63.5732	60.7193	44.8363	43.7277	51.1035	53.4572	44.883	47.4148	39.8007	40.8349	46.5072
'guaC'	461.958	475.217	419.618	387.746	332.267	355.612	369.252	414.784	341.202	131.084	120.599	119.921	189.138	159.004	96.1237	183.747	163.077	152.671
'hofC'	7.39758	9.98061	8.77446	8.99258	7.81585	8.02026	8.67813	9.03658	8.24583	6.26971	6.9553	5.94226	6.40555	5.5876	5.8239	5.04142	4.67134	5.53657
'hofB'	15.577	14.7958	13.255	16.092	12.4428	12.0304	15.2873	12.8415	12.9934	13.6458	13.8501	13.9219	16.305	14.7586	12.1772	15.2569	15.1687	11.9036
'ppdD'	0.541286	0.963042	1.05791	1.06491	0.437687	0.859313	0.919537	1.00406	0.437279	0.579553	0.725771	0.509337	1.10641	0.728818	1.05889	0.862349	0.577357	0.922761
'nadC'	118.963	120.205	115.313	129.919	123.615	133.408	134.942	130.423	134.37	79.3461	87.6368	89.9828	81.467	79.3197	70.5339	73.1007	65.7662	92.4607
'ampD'	60.5639	57.695	59.9277	62.1198	60.651	57.2159	65.5745	67.2195	59.8447	59.4305	56.2472	54.3858	64.5796	59.6416	61.298	81.9895	74.689	79.219
'ampE'	77.5242	74.7671	76.4187	76.7919	82.2852	75.3331	86.6664	90.8943	84.8321	78.5031	72.6376	67.0627	62.5997	72.821	69.6515	89.4853	101.615	107.502
'aroP'	73.0135	73.0161	64.3461	69.6925	63.9649	64.6633	70.5745	70.813	66.4664	52.0544	52.5579	57.1023	39.1903	38.0807	45.4146	43.1174	44.1941	56.15
'pdhR'	47.8136	25.9146	26.759	48.5126	29.3876	41.1038	34.3677	24.9959	39.6674	61.3272	64.6541	129.711	41.7525	30.9747	52.6504	36.484	34.2215	114.146
'aceE'	2835.44	2723.48	2515.03	1812.24	1479.2	1443.36	1258.67	1373.19	1579.2	3444.44	3535.23	3328.29	2725.04	2350.92	2054.07	2430.5	2217.1	2895.44
'aceF'	2479.21	2356.13	2311.92	1432.54	1287.24	1143.53	1070	1191.56	1320.89	2567.95	2609.63	2309.33	2173	2081.62	1755.52	2059.02	2109.87	2149.8
'lpd'	1291.15	1157.58	1182.56	745.319	667.598	632.526	594.366	661.467	703.332	2281.33	2127.17	2423.03	2282.41	2155.96	2016.72	1959.59	1876.73	3104.68
'yacH'	17.3813	18.2978	18.5446	17.2752	21.3842	17.4727	21.5517	19.4471	20.9894	14.3308	14.334	15.0537	14.034	14.1512	14.1774	15.4559	14.3814	16.1483
'acnB'	356.587	286.199	274.933	288.828	268.24	281.783	299.309	295.354	313.154	2571.74	2312.49	3005.26	1998.12	2005.1	2564.99	2998.06	2638.31	4750.33
'yacL'	72.8932	63.911	65.964	59.635	66.7786	58.3617	65.1147	70.9715	60.4694	66.3852	63.4445	53.9897	68.0153	79.3804	67.8866	120.198	123.817	85.4477
'speD'	147.23	142.968	149.975	128.736	123.741	131.26	123.62	126.671	131.808	117.491	128.22	148.443	102.139	87.7011	57.533	102.023	94.3717	147.826
'speE'	174.956	157.589	160.927	141.16	127.242	133.838	135.402	137.715	139.305	144.414	148.36	171.307	126.772	112.542	80.7698	112.238	111.063	178.554
'yacC'	82.1552	85.3605	82.7662	77.7385	84.2236	87.0771	93.2181	80.5894	97.4507	47.576	46.0864	58.2342	37.4434	24.3547	39.1789	37.6117	30.4425	60.7638
'cueO'	143.681	133.25	136.782	122.228	123.553	120.662	147.586	135.02	140.804	75.3419	76.8107	72.439	61.3186	64.9862	73.887	104.875	94.1092	75.7125
'gcd'	75.3591	46.8389	47.7928	47.8027	38.5165	46.6177	44.1953	43.4919	52.5359	36.8806	36.2281	51.8392	22.303	21.4394	29.6489	29.5852	23.7241	66.0235
'hpt'	216.996	217.647	207.725	207.776	203.9	196.998	234.022	228.187	235.818	247.1	251.298	277.589	145.697	135.196	154.539	166.632	172.997	279.458
'can'	217.116	218.26	218.988	241.971	231.849	248.198	246.436	229.667	244.814	239.619	213.981	296.66	191.468	161.555	181.6	163.714	141.767	222.524
'yadG'	113.61	97.1797	112.077	104.953	105.358	103.476	112.241	116.841	119.377	88.3028	84.7337	100.226	62.1338	57.2729	70.7103	83.8469	82.2996	127.156
'yadH'	82.5762	81.9461	74.4896	81.5248	78.221	73.8293	83.5629	88.4634	91.891	73.814	70.4603	77.306	43.2666	48.4664	57.7095	72.1056	72.2746	96.3362
'yadI'	19.4262	15.8464	20.3493	17.7485	18.633	18.1172	18.1609	22.6179	21.6141	57.5338	57.2754	37.2948	66.0936	71.1205	71.181	93.1337	97.6783	67.7307
'yadE'	30.3722	27.4905	30.3684	29.2259	31.451	29.7179	33.678	31.7602	35.1697	25.395	27.1559	26.7685	35.5799	32.8575	31.8255	33.7643	35.2713	38.0639
'panD'	330.305	348.884	326.584	358.283	344.147	314.151	372.068	388.732	388.991	245.204	239.686	272.665	167.418	143.334	145.539	144.477	141.715	238.072
'yadD'	10.946	10.2433	12.1349	11.8323	12.4428	11.3859	12.5287	11.8374	13.4932	8.74598	9.07214	9.39443	9.72479	8.74581	10.2359	11.0779	11.7571	12.0882
'panC'	544.294	545.519	545.572	535.65	544.358	549.173	561.262	561.061	551.346	334.507	339.54	338.652	313.872	311.387	326.668	403.115	388.666	373.903
'panB'	442.051	427.941	421.796	424.899	415.24	403.018	427.182	428.26	413.916	296.678	311.658	295.585	288.832	302.216	314.196	361.258	365.835	324.996
'yadC'	10.8257	10.681	10.3302	10.4125	8.75375	8.73635	8.7356	10.0406	8.68311	5.37404	6.29001	5.88567	5.53207	5.52687	6.76513	7.2968	5.6686	5.81339
'yadK'	2.22529	1.31324	2.55144	1.18323	0.625268	1.07414	1.66666	1.69106	0.999494	1.00105	1.51202	0.905488	1.22288	0.728818	0.588272	1.19402	0.997253	0.738209
'yadL'	3.84915	3.76462	2.48921	2.12982	2.81371	2.93599	2.29884	1.79675	2.81108	1.52791	1.69347	1.5846	1.74697	1.82204	2.23544	2.25537	2.51938	1.06118
'yadM'	2.16515	1.83853	2.11583	1.65653	1.56317	1.86184	1.89655	1.21545	1.62418	0.684926	1.2701	0.679116	1.28111	1.09323	0.529445	1.79103	1.46964	1.15345
'htrE'	13.4119	12.5195	11.8237	9.46587	10.6296	10.7414	10.4023	9.72357	9.99494	3.31926	5.14088	3.56536	4.60035	4.67658	4.88266	3.98007	4.88129	4.29084
'yadV'	2.16515	3.06422	2.86259	2.24815	1.81328	2.21989	2.12643	2.21951	2.31133	1.05373	0.66529	0.679116	1.28111	1.09323	1.35303	0.928683	0.787305	1.19959
'yadN'	1.02243	1.22569	0.933453	1.06491	0.625268	0.644485	0.632182	0.951219	0.312342	0.63224	0.302405	0.735709	0.640555	0.242939	0.588272	0.464342	0.314922	0.645933
'folK'	18.2835	19.3484	16.9889	19.76	17.0073	18.9765	19.4827	19.6057	19.74	7.21807	7.01579	8.8851	5.5903	8.50287	7.23575	5.10776	4.35642	8.07416
'pcnB'	416.49	415.159	402.07	375.795	348.837	339.285	366.665	377.264	373.936	179.767	180.354	229.258	159.149	150.379	146.774	118.739	110.643	168.635
'gluQ'	47.9339	50.691	43.1878	43.4247	41.0176	41.247	43.3907	37.4675	42.6034	24.1832	26.0068	30.8432	21.6624	20.5284	22.4132	24.6764	22.0445	24.407
'dksA'	900.46	865.512	862.075	746.976	756.574	727.265	765.227	777.569	728.194	1006.68	1073.6	1339.44	788.29	729.243	823.64	819.364	804.626	990.584
'sfsA'	131.051	110.225	135.413	146.839	159.818	192.128	163.735	170.427	150.986	108.429	105.902	73.3445	138.127	138.961	139.656	264.675	215.669	140.906
'ligT'	31.4548	30.1169	32.2353	33.8405	30.2004	32.5823	32.4137	31.9715	30.2972	28.6615	29.938	30.5036	21.4877	20.5891	20.8248	25.7378	21.9921	26.068
'hrpB'	140.434	137.102	126.452	134.889	129.055	123.24	136.896	139.618	139.992	151.474	159.73	144.878	142.261	151.23	151.833	151.906	162.447	131.586
'mrcB'	287.664	290.051	293.104	296.874	282.559	280.279	309.597	296.833	309.593	197.417	210.897	203.056	140.747	146.796	166.658	198.871	193.887	210.482
'fhuA'	2073.79	2200.29	2137.17	1767.28	1711.67	1705.74	1773.27	1853.4	1792.91	63.6981	66.408	79.9659	55.146	55.5116	75.4753	155.289	180.188	70.1298
'fhuC'	231.009	254.418	254.646	231.204	226.347	221.13	241.551	254.398	247	12.276	12.2171	12.3373	13.8593	12.5721	14.4715	22.8191	26.3485	14.3028
'fhuD'	133.397	144.719	144.436	146.484	134.87	138.851	154.252	150.345	151.673	8.16643	6.41098	6.73456	6.75495	8.62434	10.1771	10.9452	11.967	7.42823
'fhuB'	258.494	264.661	288.25	282.083	287.06	279.277	344.252	344.553	339.078	26.3433	28.1841	25.58	23.7588	21.3787	30.5313	31.9069	34.379	25.3759
'hemL'	487.639	503.408	489.067	488.676	432.685	445.339	465.056	487.394	458.143	507.004	508.04	492.189	427.891	411.114	362.964	410.743	408.716	346.774
'clcA'	210.32	214.145	213.014	202.096	206.839	208.885	212.298	198.911	205.459	133.034	132.453	115.506	132.129	128.211	145.127	184.078	181.08	140.121
'erpA'	170.866	161.791	167.897	186.123	162.069	183.965	176.666	179.199	179.284	84.0352	79.4719	84.7763	44.7224	48.6486	48.709	75.8204	73.6918	63.7166
'yadS'	16.1183	13.395	14.9975	17.8668	16.5071	14.8232	16.0344	16.6992	14.0554	10.0105	11.1285	13.4125	10.773	7.95626	6.94161	7.4958	8.66036	11.3961
'btuF'	24.1775	26.2648	28.6259	28.3976	30.0129	29.145	32.2413	33.5041	33.5455	27.6078	27.2769	25.0141	27.078	22.5326	25.7075	24.6764	23.3042	23.5304
'mtn'	304.684	311.238	313.454	341.008	317.011	328.687	334.194	335.992	322.587	241.674	254.564	259.932	235.491	234.558	199.071	246.234	245.272	238.211
'dgt'	111.325	110.137	115.562	98.9184	102.982	104.908	102.356	108.439	99.8245	113.382	114.309	116.808	100.509	102.581	107.772	113.764	105.132	139.844
'degP'	534.851	594.985	601.206	629.836	588.44	608.752	550.688	559	473.448	377.921	398.69	481.55	197.582	185.059	242.015	500.958	428.871	934.295
'cdaR'	13.5322	14.4456	14.064	13.2522	12.5054	14.6799	13.7356	13.9512	13.743	47.1019	37.8006	32.3712	67.2001	69.4806	46.297	49.0212	46.3985	56.6575
'yaeH'	294.7	278.757	291.486	269.422	277.807	290.591	254.022	257.358	224.012	128.45	134.751	120.826	232.754	246.826	204.719	328.29	310.408	180.953
'yaeI'	12.5097	15.8464	12.1349	15.0271	14.7563	13.749	15.5747	15.1138	17.4912	20.337	19.2934	20.4301	17.0621	15.9733	18.7071	22.1557	18.213	28.7901
'dapD'	1012.45	1064.25	1054.06	1072.84	1021.06	1041.49	1071.32	1110.02	1089.7	1105.21	1130.75	1092.81	836.507	843.363	924.411	1061.35	985.076	1003
'glnD'	184.759	172.297	165.159	162.103	143.124	148.518	148.793	159.699	155.109	86.7222	89.0884	83.5312	93.754	92.985	85.7701	103.349	103.032	85.6784
'map'	442.772	474.692	437.292	473.412	423.681	444.265	442.412	452.78	441.152	289.724	295.933	318.788	286.852	294.807	311.902	309.849	312.035	304.465
'rpsB'	3385.21	3258.58	3280.53	2688.9	2646.95	2632.15	2734.53	2837.7	2929.08	3672.84	4017.81	4615.84	4785.12	4632.06	3185.02	2048.34	2161.73	3383.67
'tsf'	1708.9	1675.52	1623.71	1386.04	1298.81	1314.89	1360.69	1425.08	1445.08	1959.94	2192.43	2529.08	2590	2537.62	1575.86	1003.84	1107.58	2009.73
'pyrH'	181.572	159.427	164.288	212.391	189.519	199.146	181.149	207.313	200.086	187.354	187.672	212.846	444.138	369.814	219.308	172.47	176.251	233.043
'frr'	877.485	894.141	907.752	957.118	886.38	945.173	905.802	974.736	907.916	703.577	715.55	752.404	844.019	741.511	710.868	741.421	695.033	803.263
'dxr'	120.105	121.781	118.984	101.285	99.23	114.79	122.528	119.854	116.941	78.0289	79.1695	73.1747	58.9311	62.0102	65.71	72.7026	69.3354	69.4839
'ispU'	166.836	166.431	161.239	175.355	173.137	178.451	181.321	180.89	181.845	126.448	113.039	127.447	110.467	103.553	115.596	107.462	105.971	159.961
'cdsA'	133.938	131.937	135.6	139.267	145.625	131.045	153.448	146.646	154.297	122.075	114.067	126.542	77.8566	86.6078	103.301	92.205	101.405	139.521
'rseP'	437.48	431.53	467.66	454.007	458.696	458.515	467.585	457.959	474.885	335.614	325.569	381.154	263.792	256.301	292.371	300.429	290.883	438.45
'bamA'	1516.93	1590.51	1624.33	1690.61	1605.19	1647.37	1691.26	1726.2	1704.95	1295.56	1297.92	1449.52	1120.04	1096.75	1078.42	1265.93	1145.32	1789.14
'skp'	1015.45	1107.76	1102.41	1201.1	1158.87	1145.18	1227.12	1249.16	1242.93	772.702	801.916	788.34	636.479	619.556	681.631	775.517	748.78	959.948
'lpxD'	1055.75	1088.5	1071.54	1065.74	1015	959.566	1128.5	1098.92	1166.16	809.319	846.793	862.364	575.219	541.086	588.037	569.15	605.7	756.433
'fabZ'	275.755	288.825	296.154	278.297	263.363	277.558	272.758	270.992	282.357	257.163	263.273	271.476	208.122	196.659	184.541	87.0972	75.1089	92.7836
'lpxA'	524.146	530.636	498.838	480.275	458.259	423.283	510.975	502.825	533.792	539.195	551.525	550.763	318.123	316.489	322.373	160.331	169.481	200.516
'lpxB'	229.265	221.325	214.445	209.906	219.219	192.701	223.562	216.244	236.818	168.808	173.701	192.529	122.695	116.186	137.656	97.1801	102.665	122.912
'rnhB'	54.5496	58.1327	54.6381	57.8602	48.4583	49.1957	60.4596	54.5366	61.8437	45.4159	48.3847	45.1612	29.2326	28.4239	28.943	21.9567	24.144	37.2334
'dnaE'	392.974	405.528	419.743	440.636	435.061	429.728	495.631	452.728	491.939	412.22	400.807	409.28	279.69	251.989	236.191	264.807	239.341	319.644
'accA'	386.599	370.771	372.884	367.158	365.094	352.605	402.642	401.203	408.606	497.52	444.051	480.531	302.983	273.671	286.312	285.238	280.701	399.279
'ldcC'	192.698	166.431	184.513	196.417	203.024	198.501	194.54	197.272	197.65	50.0523	47.4775	35.7668	56.7765	64.3789	101.124	214.194	203.86	90.7074
'yaeR'	45.2275	39.3096	42.3166	46.7378	45.0193	50.1266	47.1263	46.8211	43.2906	23.9724	23.4061	22.1844	21.0801	17.7346	22.2955	44.2451	40.7299	30.7279
'tilS'	85.824	87.3742	92.3497	97.4985	90.1011	91.5168	97.8732	94.4878	93.2653	71.9173	69.7345	73.2313	49.7886	53.5681	52.5327	56.9814	53.9567	61.3636
'rof'	58.8799	57.1697	57.9986	58.6884	53.773	52.6329	55.4021	56.8618	54.41	40.8848	38.3449	37.6343	32.4354	31.157	33.0021	55.92	55.8987	45.7689
'yaeP'	136.945	153.824	134.853	144.236	127.992	123.884	130.517	127.358	119.315	79.0826	80.3186	85.4554	73.8385	69.1162	78.2402	142.288	133.999	95.921
'yaeQ'	52.8055	57.1697	53.6425	53.7188	51.0844	55.7121	58.3906	55.752	56.9712	57.3758	59.6342	58.9133	39.1321	39.9635	45.8264	47.4955	49.2853	66.6233
'arfB'	31.996	28.5411	31.7996	30.4091	30.0754	27.9277	29.77	28.748	28.1108	24.0778	27.7607	29.0322	20.3813	23.2007	25.3545	28.3912	26.191	28.2365
'nlpE'	96.349	92.452	96.3946	98.2085	94.5405	88.7957	95.8617	89.0975	91.0789	69.3883	76.3269	73.5709	62.425	66.3831	77.652	88.8883	88.5981	88.5389
'yaeF'	19.9675	20.0488	19.1669	16.9203	15.1315	17.6875	17.0689	16.065	19.3652	12.8555	14.0316	13.0164	10.1907	11.2359	13.8832	15.9203	15.6411	16.056
'proS'	841.159	875.93	835.379	921.976	925.334	862.535	914.48	915.496	909.852	796.253	792.602	822.013	791.668	731.915	559.271	510.842	477.947	570.174
'tsaA'	37.7698	46.7513	43.6856	47.4477	48.3957	49.4105	50.2297	45.8171	48.2256	31.5066	30.9662	36.6157	31.0378	24.051	25.2957	26.0695	22.0445	28.5595
'rcsF'	54.3692	60.9343	60.8612	60.8182	58.4625	56.6431	61.4366	53.7967	56.5964	43.1504	43.1229	47.8777	59.1058	46.7658	43.4733	41.0611	38.9979	41.8011
'metQ'	374.39	373.31	365.727	363.726	362.218	340.718	309.999	316.069	337.767	148.208	148.36	163.441	121.181	117.643	104.301	140.762	128.541	139.152
'metI'	67.2398	66.2748	63.5371	70.5208	70.0925	63.8756	67.471	63.7845	73.5878	39.7257	40.4617	42.0486	36.6863	32.9183	27.4135	28.7892	31.1248	30.082
'metN'	88.4703	88.8625	86.3756	98.2085	98.9174	89.8698	77.471	83.3902	89.5172	38.672	37.3167	40.9167	31.7948	26.9055	21.119	22.1557	22.7269	19.5164
'gmhB'	108.378	99.2809	111.641	103.06	114.737	119.373	122.241	116.63	122.501	102.054	98.8863	94.0575	97.3062	98.5726	94.1824	116.152	104.187	115.853
'dkgB'	15.0357	15.0585	15.3086	13.8438	14.6313	12.102	11.4942	12.7886	9.99494	22.6553	22.8618	18.5625	27.4274	28.1809	26.6487	32.3049	27.0308	18.5014
'yafC'	41.2581	36.6831	39.8273	36.207	33.827	33.37	31.9539	33.9797	32.0463	60.0628	68.3434	70.5148	60.911	62.4961	59.8861	63.0841	64.2966	66.6695
'yafD'	195.585	190.857	190.549	202.215	211.341	199.361	211.494	206.943	218.202	150.262	174.306	210.582	118.153	117.34	147.009	155.156	146.176	230.275
'yafE'	25.4405	27.2278	25.8255	26.8594	22.5096	26.9251	28.0459	27.9024	30.1098	19.5467	20.2611	25.1273	23.4676	22.1075	28.3547	26.6665	26.7159	30.1281
'mltD'	586.514	613.37	602.762	659.417	620.703	644.485	672.469	672.882	697.71	193.676	201.583	244.651	156.936	142.484	178.07	166.765	149.483	281.857
'gloB'	89.192	85.4481	89.9849	81.2882	96.854	96.0282	91.5514	90.2601	87.7056	53.0028	59.5132	60.1017	59.8046	58.4269	63.7687	75.2234	74.899	54.0277
'yafS'	51.3019	54.4556	55.6961	55.4937	54.3983	51.7736	49.8849	51.5772	52.7858	44.4148	47.1751	39.6717	53.2243	46.0977	48.2383	59.1041	50.7549	44.9846
'rnhA'	40.0552	44.8252	42.441	44.4896	44.4565	47.4054	48.7355	45.3415	48.7878	29.9787	31.9944	32.9371	31.6784	27.5736	26.7664	24.8091	25.4562	32.2966
'dnaQ'	142.9	145.332	146.552	141.515	142.186	146.799	140.229	144.374	136.993	76.0268	78.9881	77.7587	82.5152	73.4284	75.24	83.7142	79.3604	72.206
'yafT'	4.45058	3.67707	4.35612	4.25964	3.81413	3.07921	3.62068	2.85366	3.24836	2.95045	3.32645	3.28239	2.67869	3.64409	3.05902	3.98007	2.46689	4.06015
'ykfM'	0.541286	0.700394	0.311151	0.35497	0.375161	0.429657	0.344826	0.369919	0.249874	0.210747	0.725771	0.622523	0.349394	0.607348	0.235309	0.0663345	0.314922	0.322966
'yafV'	104.589	105.059	103.302	108.148	114.111	107.629	112.586	112.614	105.634	63.2767	66.4685	62.1391	63.415	64.0145	63.7099	91.807	92.6396	85.3554
'ivy'	447.945	405.265	437.665	520.623	577.685	507.066	448.677	465.569	436.529	82.6653	80.3791	76.061	77.6236	90.6163	105.242	187.13	171.947	91.5379
'fadE'	19.787	19.3484	17.0511	21.8898	18.1328	17.974	17.5861	16.5935	18.0534	22.4972	23.1642	53.6501	19.2167	18.7063	21.5308	23.1508	23.3567	106.579
'gmhA'	341.913	335.664	325.091	323.97	326.14	336.851	345.459	348.78	339.328	350.208	355.265	358.913	371.289	373.641	322.197	370.478	360.271	330.671
'yafJ'	143.501	138.065	133.733	135.599	136.809	139.137	142.643	143.687	149.362	129.556	123.502	125.353	125.549	124.567	115.301	128.49	127.753	124.157
'yafK'	212.184	212.132	211.769	190.027	178.827	186.471	204.137	192.622	205.708	37.9344	42.1552	43.6898	51.1862	35.1655	35.1199	33.2336	33.1193	48.5372
'yafQ'	16.7197	17.5974	17.9223	19.0501	17.0698	21.9841	19.7126	16.8577	19.8025	10.6954	9.43502	9.79058	16.2468	13.4831	13.5891	17.5787	18.0555	12.8264
'dinJ'	91.9585	89.1251	89.736	90.5174	90.3512	88.2228	87.6434	87.8292	95.7016	44.2041	50.0177	38.8228	59.921	56.6048	50.2385	88.2913	74.0067	47.9836
'yafL'	10.6453	9.63042	10.1435	10.4125	11.3799	12.0304	12.5287	11.7845	10.807	4.95254	4.71751	4.867	6.23085	4.1907	4.35322	7.42947	7.61062	4.52153
'rayT'	17.7422	16.0215	15.2464	14.1988	14.0685	16.2553	15.862	16.3293	12.806	25.2896	25.8858	20.6564	27.2527	30.8533	28.59	37.678	34.5889	29.5745
'dinB'	26.1622	31.3426	25.2032	26.2678	27.7619	26.2807	27.4137	28.4837	26.4866	23.3929	22.9223	21.9015	27.7186	29.9423	23.6486	35.29	30.0751	22.8383
'yafN'	11.6677	10.5059	9.77015	10.6491	11.3173	10.6698	9.36778	11.4146	10.4322	6.58583	5.0804	6.96094	8.32722	7.59185	7.00044	11.7412	8.60787	7.56664
'yafO'	6.07444	5.8658	5.72518	5.20623	5.62741	5.51393	6.1494	5.54878	6.05943	5.16329	5.0804	4.18788	4.01803	4.55511	4.70618	4.97509	5.2487	4.47539
'yafP'	6.73601	5.8658	6.34748	4.96958	5.56488	5.72875	5.1724	4.59756	5.87203	4.26762	3.56837	3.84832	4.77505	4.06923	3.58846	6.63345	5.30119	3.96787
'pepD'	1528.47	1554.79	1580.09	1664.57	1791.14	1763.17	1754.13	1754.68	1699.58	1397.78	1413.02	1285.28	1086.85	1083.45	1156.37	1344.14	1258.27	1252.23
'gpt'	78.246	64.7864	72.0626	87.2044	89.1007	88.4376	88.5629	80.9065	89.3923	28.1347	28.9099	33.6728	41.9272	31.6428	29.0607	28.3912	25.5612	28.2826
'frsA'	147.531	148.221	149.788	157.607	155.317	147.659	160.919	160.069	146.176	122.391	133.481	119.694	130.964	125.843	108.242	153.432	147.698	132.001
'crl'	141.276	115.828	117.366	128.263	124.803	128.539	131.436	130.793	136.119	151.843	144.912	223.372	155.014	152.444	146.245	171.806	154.207	228.891
'phoE'	4.81143	3.76462	3.42266	1.89317	2.81371	3.07921	2.87355	2.80081	2.62367	4.53105	3.99174	5.14996	3.90156	2.97601	5.52976	3.8474	3.04425	3.09125
'proB'	521.68	517.766	502.882	425.491	407.237	401.8	450.631	460.654	438.153	342.779	325.932	347.82	221.108	226.541	318.785	253.796	229.893	334.409
'proA'	603.594	619.849	597.472	531.036	492.023	494.248	556.148	559.581	533.23	344.834	344.197	360.271	195.369	205.284	291.312	300.628	273.93	320.844
'ykfI'	9.20187	8.49228	8.46331	6.0345	7.50321	7.30416	7.81607	6.39431	7.43374	4.95254	6.16905	5.48952	5.12444	5.16246	5.70624	5.70477	5.35368	5.16746
'yafW'	5.59329	6.3911	3.67158	4.14132	3.5015	3.86691	4.54021	4.01626	4.49772	2.42359	3.74982	3.28239	1.8052	2.18645	2.82371	3.71473	3.30668	2.95284
'ykfH'	0.781858	1.05059	0.995684	0.473294	0.312634	1.07414	1.03448	0.792683	0.499747	0.63224	0.483847	0.735709	0.349394	1.2147	0.294136	0.398007	0.367409	0.507519
'ykfG'	2.947	4.46501	3.60935	3.07641	3.25139	3.43725	3.73562	3.17073	2.49874	4.10956	3.26597	3.90492	3.55217	2.49013	2.76488	2.38804	3.30668	2.3069
'yafX'	26.4027	23.9009	21.9673	23.6647	23.0099	20.5519	24.5401	26.1585	25.1748	15.4899	15.9065	15.7328	13.2187	12.9365	14.0009	11.3432	11.8096	16.5636
'ykfF'	8.05915	9.89307	8.77446	10.1758	9.75418	9.66727	10.9195	10.7276	10.9944	6.11165	5.20136	5.71589	4.71682	4.12997	5.41211	4.84242	5.14373	6.41319
'ykfB'	37.4089	33.7065	36.9025	37.6269	35.8904	32.1526	36.6091	34.7195	33.9828	33.8775	36.6514	34.1822	28.6503	29.9423	34.3551	46.3015	43.0918	37.1411
'yafY'	3.96943	4.02727	3.36043	4.023	3.31392	2.72116	4.19539	3.43496	3.99798	4.79448	4.65703	5.88567	3.4357	3.40115	3.94143	3.71473	3.77907	5.30588
'yafZ'	8.23958	8.22963	7.96547	8.04599	6.75289	8.30669	7.87354	8.03252	7.49621	5.84822	5.74569	6.16863	6.46378	5.22319	6.29451	5.50577	5.09124	5.95181
'ykfA'	29.5302	28.0158	28.9371	25.5579	23.5726	24.8485	26.1493	28.2724	24.1128	17.65	17.358	16.412	18.4596	19.4959	22.3544	18.9717	19.0003	19.8394
'perR'	15.8777	13.6577	16.6777	15.737	16.7572	16.8998	16.6091	17.5447	16.1168	10.5373	9.1931	10.8093	12.7529	12.815	11.0007	16.5173	13.7516	11.4422
'mmuP'	15.998	17.1597	13.6284	13.4889	14.5062	15.038	16.839	13.8984	13.4307	6.21702	6.16905	7.2439	6.92964	5.22319	7.82402	7.36313	8.29295	6.73616
'mmuM'	50.3998	52.6171	50.282	44.9629	47.0827	44.5411	51.4366	50.2561	47.476	113.592	113.825	97.2833	95.6756	100.516	102.242	111.376	123.974	135.692
'afuC'	7.15701	6.74129	6.09856	4.96958	5.94004	4.86944	5.28734	4.96748	4.81007	6.95464	6.6529	5.6027	7.16257	6.74156	5.64741	7.36313	7.08575	7.79733
'yagA'	1.44343	1.92608	1.49353	2.72144	2.75118	2.00506	2.01149	1.95528	1.68665	1.47523	1.33058	1.41482	1.86343	1.15396	1.47068	2.25537	2.04699	1.56869
'yagE'	9.62287	7.70433	10.5169	9.82085	9.31649	10.6698	11.3218	11.9431	8.37076	189.145	177.814	252.122	139.525	138.84	187.129	128.026	133.002	273.599
'yagF'	29.891	27.0527	29.8083	33.8405	30.8257	29.2883	35.3447	35.0366	29.3601	501.682	487.416	681.719	282.543	304.464	470.971	285.703	307.416	760.586
'yagG'	10.525	9.10512	9.21007	10.6491	9.87923	9.45244	10.1149	10.939	7.74608	14.963	16.2089	19.3548	9.95772	10.8108	13.0596	11.0779	12.072	19.4703
'yagH'	15.9379	15.4962	16.9266	18.4585	15.194	14.1787	16.7816	15.2724	16.6166	24.9735	24.3133	21.279	15.6063	17.9775	25.1781	21.8904	25.0888	28.2826
'yagI'	55.6924	53.9303	59.4299	44.8446	40.8925	41.3186	44.7125	46.874	43.5405	57.2704	53.707	59.0265	36.3369	27.8773	36.0023	27.8605	23.4617	30.3588
'argF'	109.641	103.483	104.858	97.3802	83.7234	80.7754	82.1262	96.126	79.3973	40.0945	38.7078	36.6157	30.8631	32.9183	55.2388	35.6216	32.437	31.2355
'yagK'	12.6902	12.6071	12.5083	11.9507	11.1298	12.0304	12.1264	10.5691	12.1813	7.903	10.3422	7.80983	9.49186	8.68508	9.35353	9.2205	8.87031	8.85851
'yagL'	4.63101	5.6907	4.91619	3.19473	4.4394	5.58553	4.54021	3.54065	5.30981	3.26657	3.99174	2.99943	4.19272	2.7938	3.17667	3.11772	4.30394	2.72214
'yagM'	1.74414	2.10118	2.30252	1.77485	1.75075	2.14828	2.5862	1.53252	1.93652	1.79135	1.87491	1.6412	1.39757	1.33617	1.70599	2.05637	1.36466	1.75325
'yagN'	86.5457	95.3411	91.2295	90.1625	88.663	98.6062	89.7698	86.191	87.0809	88.1447	85.7014	91.2845	117.105	103.188	96.0061	103.349	87.3909	86.9702
'intF'	101.221	98.4054	93.2209	69.5742	74.5319	74.9035	70.2297	75.6219	74.9621	71.4958	73.6657	75.778	74.8867	62.8605	67.3572	74.4273	61.5673	46.9224
'paoD'	12.1489	12.6071	12.0727	13.8438	15.3191	13.4626	17.3563	13.1057	13.9929	5.74284	5.14088	4.41425	3.7851	5.10172	4.47087	7.16413	5.2487	5.67498
'paoC'	29.1092	32.043	26.8835	30.7641	33.7645	32.9403	33.3332	30.2805	29.735	10.1685	11.4309	8.99828	8.15252	8.92802	9.41236	12.8689	14.5914	10.9809
'paoB'	11.367	10.5059	11.077	10.7674	12.943	10.813	14.1379	10.8333	11.1194	4.3203	4.05222	4.13129	3.55217	2.85454	4.5297	4.57708	5.35368	4.89063
'paoA'	9.98373	7.96698	8.89892	9.34755	11.1298	9.30922	8.85055	8.93089	7.93349	1.63329	1.20962	1.52801	1.57227	1.33617	2.00013	2.71972	2.67684	2.49145
'yagU'	434.172	389.244	417.938	306.813	295.689	300.115	345.631	401.362	360.817	122.654	143.642	144.199	85.6015	95.7181	104.36	62.8851	56.476	68.4227
'ykgJ'	12.8706	13.395	13.0683	11.359	11.1923	12.3884	12.2988	13.687	11.9315	3.74075	4.59655	4.867	7.27904	4.73731	5.52976	6.03644	3.77907	3.64491
'ecpE'	12.3894	15.2336	14.873	15.382	11.8801	14.2503	14.1379	14.4268	14.0554	10.2212	8.34636	8.8285	10.016	9.04949	9.41236	11.8075	10.5499	10.2888
'ecpD'	28.0266	29.0664	27.8791	30.6458	30.5131	29.8611	28.2758	31.0732	29.9848	18.493	18.87	16.5251	18.1685	16.8843	20.2366	27.2635	22.9893	18.4091
'ecpC'	18.7045	17.2472	13.5662	20.2333	19.1957	18.2604	19.0229	19.0772	16.9289	13.4878	12.4591	11.545	11.7047	11.0537	11.8243	13.5986	13.1742	10.7963
'ecpB'	1.86443	1.83853	1.92914	1.30156	1.6257	1.5038	2.1839	2.85366	1.93652	0.895673	1.45154	1.52801	1.10641	0.789552	0.823581	1.7247	1.52212	1.38414
'ecpA'	24.7789	24.2511	21.7806	18.9317	22.4471	22.1273	21.5517	22.565	23.6131	8.79867	8.52781	9.11147	10.9477	10.2034	10.2948	13.8639	14.4864	12.365
'ecpR'	1.684	1.22569	1.55576	0.709941	1.43812	1.71863	1.20689	1.90244	1.56171	0.579553	0.423366	0.792302	0.349394	0.546613	0.294136	0.331673	0.367409	0.369104
'ykgL'	2.526	2.88913	3.9205	3.90467	3.31392	3.07921	2.87355	3.17073	2.68614	2.10747	1.93539	1.92416	2.27106	1.33617	2.64723	2.52071	1.99451	2.72214
'ykgO'	0.300715	0.525296	0.248921	0.236647	0.500214	0.429657	0	0.211382	0.499747	0.94836	0.66529	0.905488	0.349394	0.182204	0.470618	0.398007	0.104974	0.507519
'ykgM'	1.14272	1.66344	1.2446	0.591617	0.687795	1.07414	0.459769	0.581301	0.874558	2.10747	2.35876	3.16921	2.15459	2.36866	1.23537	1.9237	1.46964	1.06118
'ykgR'	0.902144	0.700394	0.933453	0.473294	0.625268	0.429657	0.747124	0.686992	0.499747	14.6469	16.9951	16.5251	15.6645	21.5609	25.4722	16.849	17.2157	11.8575
'rclC'	3.789	2.45138	2.80036	2.12982	2.50107	2.64955	3.21838	2.69512	2.24886	1.52791	1.45154	1.81098	0.873484	1.03249	1.41185	1.19402	1.88953	1.29187
'rclB'	0.421001	0.525296	0.560072	0.236647	0.687795	0.501266	0.51724	0.528455	0.874558	0.47418	0.302405	0.339558	0.232929	0.0607348	0.6471	0.199004	0.157461	0.184552
'rclA'	41.8595	41.2357	44.6813	45.7912	50.8968	47.0474	46.5516	44.7073	42.6659	5.32135	5.86665	5.31974	11.7629	12.3292	13.1773	23.9468	25.9286	8.39712
'rclR'	9.20187	7.70433	7.96547	7.33605	6.62784	6.15841	7.47124	6.97561	6.99646	8.37718	9.13262	9.16806	19.3331	18.4026	18.7071	26.2685	22.412	11.5807
'ykgE'	4.08972	4.11481	4.48058	5.5612	4.12677	4.51139	3.04597	3.69919	3.12342	103.424	89.9956	137.634	671.302	833.585	437.498	565.635	679.025	133.616
'ykgF'	22.6137	18.4729	22.714	20.5883	19.8835	20.0506	18.2183	18.9187	18.803	214.751	155.134	225.24	961.706	1186.76	644.041	770.542	936.946	205.591
'ykgG'	13.6524	11.9067	11.5126	14.5538	10.1919	10.3834	11.8965	11.7845	9.43273	76.3429	63.8074	75.3818	284.057	397.084	266.193	263.149	319.436	84.7556
'ykgH'	0.721715	1.31324	0.435612	0.236647	0.625268	0.286438	0.402298	0.317073	0.499747	2.10747	1.63298	3.39558	7.33727	12.147	9.17705	6.30178	8.18798	5.07519
'betA'	26.8839	16.1966	16.8022	17.1569	14.3812	14.6799	13.4482	15.061	16.804	64.2777	75.2987	174.759	23.3511	24.7191	35.1199	38.7394	34.7464	240.887
'betB'	38.1306	30.8173	28.0036	29.2259	23.8852	27.6412	25.9769	24.3618	27.8609	80.3998	82.7984	236.898	46.9352	45.4904	55.5329	54.1953	49.0754	265.155
'betI'	16.9002	13.9203	12.1971	14.0805	11.1923	12.8897	11.3218	10.1992	13.4932	28.3454	33.0831	78.3813	24.0499	24.4154	22.8838	23.4161	22.7269	83.5099
'betT'	30.3722	26.8776	27.0079	29.3442	31.3259	29.0734	27.5286	26.5284	28.7979	24.6047	25.7044	76.061	17.9938	17.5524	19.8248	22.6864	23.9341	54.8581
'yahA'	27.4252	25.5644	27.3813	18.9317	16.4445	16.4702	17.4137	17.8089	18.2408	9.32554	9.07214	9.56421	11.9959	9.7783	9.00057	11.8075	10.2875	10.2426
'yahB'	29.1693	28.0158	25.7633	27.806	25.9486	25.6362	25.3447	29.6463	24.3002	36.4592	34.6556	32.7673	33.7747	28.4846	30.2372	38.275	40.2575	39.4019
'yahC'	1.44343	1.22569	1.99137	1.77485	1.00043	2.2915	1.49425	1.7439	1.3743	0.737613	1.02818	1.35823	1.9799	1.51837	2.00013	1.39303	1.25969	0.922761
'yahD'	10.525	11.2063	10.2058	9.5842	9.44154	10.1685	9.08043	9.77642	8.43323	5.5321	5.32232	3.96151	9.08424	7.53112	9.00057	6.63345	6.40342	6.1825
'yahE'	0.842001	1.75099	1.92914	2.24815	1.68822	1.5038	1.83907	1.58537	1.81158	0.63224	1.2701	0.56593	1.22288	0.850287	1.00006	0.862349	1.25969	0.922761
'yahF'	5.53315	4.20236	4.16943	5.5612	3.93919	6.30163	4.31033	6.13008	5.37228	3.37194	3.8103	2.26372	2.44576	3.09747	3.52963	4.24541	3.77907	2.86056
'yahG'	18.7045	15.146	17.5489	19.2867	20.9465	17.6875	20.4022	19.9228	18.7405	5.9009	5.92713	5.31974	4.48389	5.16246	6.76513	10.3482	9.13274	6.32091
'yahI'	4.33029	5.07786	3.9205	5.32455	4.75204	4.51139	4.71263	5.39024	4.18538	4.10956	3.62885	4.07469	3.20278	3.70482	4.00025	3.8474	3.83155	3.13739
'yahJ'	54.2489	54.0179	52.2112	51.589	47.5204	43.4669	51.8389	50.8902	47.7259	41.6224	39.3731	37.8041	39.598	38.4451	37.12	40.5967	34.8514	34.4651
'yahK'	349.731	343.631	362.553	431.999	471.452	464.888	439.022	389.26	410.043	36.9333	31.7525	26.2025	61.6098	59.9453	76.4754	153.299	146.596	48.7679
'yahL'	1.02243	0.963042	1.36907	0.828264	0.375161	1.28897	0.287355	0.739837	0.937026	0.47418	0.181443	0.113186	0.174697	0.12147	0.470618	0.331673	0.419896	0.415242
'yahM'	11.8482	11.9067	12.2594	12.5423	6.00257	8.02026	8.21836	8.34959	8.62064	14.7523	16.6927	14.6576	18.1102	16.0947	16.8246	16.3846	18.108	13.9798
'yahN'	6.91644	7.70433	5.78741	5.20623	5.06467	5.72875	4.71263	6.07723	5.9345	57.9026	57.6988	40.0112	84.5533	92.4991	73.4164	87.2962	93.1645	39.1251
'yahO'	480.121	465.324	507.052	478.855	554.237	617.273	506.608	463.138	477.883	18.2823	17.1766	11.545	67.1418	71.0597	71.7104	186.931	178.456	41.109
'prpR'	7.45772	8.75493	6.40971	8.16432	8.94133	8.52152	6.89653	7.0813	7.05893	3.63538	3.50789	3.67854	4.30919	3.64409	4.5297	7.0978	6.19347	5.25974
'prpB'	3.06729	2.88913	2.42698	3.78635	3.00129	2.50633	2.5862	2.58943	3.12342	3.63538	2.90308	2.71646	1.8052	2.06498	2.82371	2.98505	3.56912	2.58373
'prpC'	3.12743	3.50197	3.23597	3.19473	2.75118	2.79277	2.93102	3.96341	2.87355	2.95045	3.02405	2.3769	1.92167	2.49013	2.64723	3.6484	2.36192	2.95284
'prpD'	3.368	1.92608	2.80036	2.72144	2.62612	1.79024	1.60919	2.74797	3.06095	2.63433	2.66116	2.49009	1.45581	1.88278	2.17661	2.91872	2.15197	2.44532
'prpE'	8.23958	9.54287	6.34748	8.04599	7.9409	6.73129	7.24136	7.60975	7.1214	7.4815	6.41098	5.6027	4.36742	4.55511	5.41211	8.02648	6.71834	5.44429
'codB'	61.8871	45.5256	56.8162	81.1699	66.0283	66.6684	52.6435	66.9024	54.0976	11.3276	9.97935	9.84718	43.9654	33.2827	18.2953	20.7627	25.0363	11.9036
'codA'	143.862	124.057	130.932	163.286	138.247	146.513	130.402	146.541	138.18	62.0649	58.9689	61.5166	122.812	109.687	77.5343	76.2184	72.957	59.4719
'cynR'	15.7574	18.9982	15.4331	16.3286	16.382	17.6159	17.9884	17.7032	18.1158	15.5426	14.5154	17.2609	14.4416	12.6936	15.2363	13.9966	12.7019	11.7652
'cynT'	7.93887	6.91639	7.59209	6.98108	7.06553	8.52152	8.44825	7.82114	6.62165	5.05792	6.04809	4.98018	4.83328	3.94776	5.8239	5.10776	5.56362	4.70608
'cynS'	5.11215	5.25296	4.91619	5.20623	4.56446	6.44485	4.48274	4.7561	4.43526	3.05583	2.35876	2.15053	1.9799	1.82204	3.00019	2.85238	3.6216	2.21463
'cynX'	9.74315	9.89307	8.52554	8.99258	7.25311	7.87704	8.04595	9.24796	9.12039	6.05896	5.56424	6.16863	5.64853	4.73731	5.23562	5.5721	6.24596	6.59774
'lacA'	3.06729	4.28991	4.41835	2.95809	2.43854	3.0076	3.21838	3.22358	2.99848	1.36985	1.39106	0.962081	1.57227	0.971757	1.35303	0.995018	1.25969	1.19959
'lacY'	4.87158	4.81521	5.10288	2.60312	4.00171	3.58047	4.02298	4.12195	4.62266	1.89672	2.11683	1.75438	3.08631	2.12572	1.9413	2.38804	3.04425	2.16849
'lacI'	81.6741	76.7807	75.1741	72.1773	74.657	75.1183	76.7814	80.378	75.7742	62.6444	58.9084	76.2873	51.3609	50.0455	50.7679	45.4392	43.3543	89.0464
'mhpR'	6.55558	4.46501	6.34748	5.5612	5.18972	5.80036	4.42527	4.70325	4.81007	9.27285	8.95117	29.9377	15.2569	15.5481	14.7068	11.2769	10.9698	50.475
'mhpA'	1.38329	1.66344	1.55576	2.24815	1.50064	1.57541	2.24137	1.10976	1.62418	2.00209	2.05635	3.28239	1.9799	1.27543	2.00013	2.91872	1.78456	2.9067
'mhpB'	1.14272	1.13814	0.871223	0.828264	0.375161	1.43219	1.03448	0.792683	0.687152	1.00105	0.604809	1.30164	0.582323	0.546613	0.941236	0.663345	0.682331	1.56869
'mhpD'	48.6556	45.0879	45.6148	41.2949	37.0159	37.3085	43.6205	45.3943	42.9783	36.7753	37.5586	34.069	30.4555	29.092	34.0021	32.5703	32.9094	39.4019
'mhpF'	32.2968	29.8543	32.982	27.806	26.824	29.0018	29.77	33.0284	30.7969	29.768	26.3092	24.9575	16.7127	19.01	21.3543	27.0645	21.4147	23.9456
'mhpE'	48.8361	43.3369	49.2863	45.5545	44.5816	43.8966	49.5975	56.8089	52.5359	38.0924	35.8047	36.842	21.7206	24.3547	30.9431	39.9997	34.6414	34.419
'mhpT'	19.7269	20.7492	20.0381	19.1684	19.7585	18.8333	23.7356	19.8171	21.5516	13.119	12.3986	10.6961	9.026	10.6286	11.7066	17.1143	16.8483	14.3489
'yaiL'	93.9433	77.5686	90.2961	83.1814	100.856	98.0333	100.517	104.106	96.9509	87.8286	94.955	81.0977	77.216	87.033	91.7705	86.2349	83.6643	85.9552
'frmB'	50.5201	41.761	49.473	44.8446	47.2077	48.5512	50.632	49.1463	50.1621	63.5928	64.6541	71.5901	47.4593	48.2234	40.8261	55.721	55.0064	54.0738
'frmA'	154.026	147.258	152.837	146.366	145.25	148.661	146.321	150.293	142.74	153.74	156.162	157.046	155.771	146.614	122.714	174.526	168.063	126.511
'frmR'	41.8595	44.7377	42.2543	43.1881	38.7666	42.9657	41.2068	40.0569	37.8558	44.731	41.248	41.3695	46.0035	46.2799	39.5319	56.1854	50.1776	38.3407
'yaiO'	10.8859	11.7316	12.0727	11.359	10.3169	9.38083	9.65514	9.9878	9.43273	4.26762	6.47146	5.94226	7.2208	5.52687	7.05927	9.08783	7.13823	5.81339
'yaiP'	9.68301	9.63042	9.70792	6.50779	8.12848	8.59313	8.62066	8.19105	6.87152	2.79239	2.05635	2.4335	3.14454	2.67233	3.29433	3.4494	4.0415	2.12235
'yaiS'	0.721715	0.963042	0.933453	0.709941	0.375161	0.716094	0.977008	0.739837	0.999494	0.263433	0.423366	0.792302	0.291161	0.425144	0.294136	0.464342	0.262435	0.138414
'tauA'	1.62386	2.80158	2.55144	1.65653	1.25054	2.93599	1.60919	2.06098	2.06146	1.36985	1.63298	2.03735	0.640555	1.03249	1.11772	1.32669	0.839792	1.66097
'tauB'	1.86443	3.41442	2.24029	2.12982	1.25054	2.07667	1.89655	2.43089	1.62418	1.31717	2.23779	1.35823	0.931717	0.971757	1.05889	1.65836	0.892279	1.84552
'tauC'	3.789	2.97667	3.17374	2.36647	2.5636	1.93345	2.47126	2.53658	1.74912	2.84508	1.81443	2.32031	1.28111	0.911022	1.2942	1.45936	1.94202	2.58373
'tauD'	7.21715	7.52924	9.33453	8.51929	8.50364	7.94865	9.82755	8.66666	9.37026	6.37508	7.01579	6.50819	4.94974	4.31217	6.17686	8.29182	6.08849	6.92071
'hemB'	238.046	242.949	232.492	231.914	211.215	220.629	221.723	224.224	221.013	289.25	302.646	323.146	352.946	338.961	271.488	336.714	324.58	326.519
'yaiV'	2.34557	3.15177	1.86691	1.5382	2.18844	2.00506	1.72413	2.21951	2.31133	2.05478	1.45154	2.32031	2.38752	1.88278	2.70605	2.71972	2.46689	2.95284
'ampH'	80.0502	86.0609	84.6953	82.3531	84.2236	79.4865	83.8503	84.6057	77.9606	89.0931	84.5523	84.5499	81.0593	72.3959	78.2402	78.9381	68.7055	83.2792
'sbmA'	53.1062	54.7183	46.2993	52.7723	54.0231	54.4232	50.6895	50.3618	51.5989	23.4456	23.7085	23.3163	23.817	19.8603	25.3545	33.6316	29.8126	45.7689
'yaiW'	75.0584	72.4032	75.4853	78.4484	70.7178	71.0365	67.471	73.0325	70.2769	40.9375	42.8205	41.0299	41.8108	41.7855	43.8263	53.731	52.4345	45.9996
'yaiY'	4.57086	3.76462	4.54281	4.14132	4.93962	4.22496	5.11493	4.28049	4.24785	4.05687	4.35463	3.96151	1.86343	2.30792	2.29426	2.65338	2.36192	1.70711
'yaiZ'	6.07444	6.30355	5.10288	4.96958	6.44026	7.01772	6.66664	5.86585	6.99646	21.7596	22.6199	17.4306	29.1744	28.9705	26.4134	28.0595	30.8624	23.9918
'ddlA'	454.681	474.167	463.491	392.242	380.038	375.09	390.401	411.085	395.113	333.506	335.548	338.822	239.801	232.311	211.896	229.119	215.407	268.247
'iraP'	84.8015	74.4169	74.4896	52.299	51.5846	53.9935	45.9769	53.5854	49.1002	13.119	9.37454	7.13071	86.4167	69.1162	51.5915	73.6977	63.2993	49.5984
'phoA'	56.1735	50.3408	45.5525	37.6269	36.3281	37.1653	36.6665	38.3658	36.7939	12.3287	11.2494	10.3565	30.339	29.4564	23.5309	39.3364	36.3735	30.9125
'psiF'	79.6292	80.808	79.9658	97.6168	87.5375	101.685	87.8733	82.2276	84.3323	7.21807	6.77386	6.4516	11.4718	11.2359	16.7069	37.8107	33.6967	13.5646
'yaiC'	8.1193	10.0682	7.59209	11.714	11.1923	10.6698	10.0574	8.93089	8.3083	3.9515	4.89895	5.6593	4.77505	3.03674	4.47087	4.51075	4.61886	3.78332
'proC'	114.031	107.598	123.403	108.503	117.988	114.862	114.195	111.081	114.192	166.384	164.871	178.89	134.575	130.215	136.185	186.931	162.71	179.385
'yaiI'	71.6302	72.4032	73.1827	67.5627	69.7799	69.7476	76.5515	67.7479	81.9585	46.4696	56.4287	52.5183	50.6039	48.0412	46.5912	45.2402	43.9841	57.3957
'aroL'	109.58	113.201	116.868	142.58	143.812	122.022	138.678	126.248	150.299	46.8384	52.4974	50.7639	34.1824	33.2827	36.8847	28.5902	33.5392	50.475
'yaiA'	75.7199	84.6601	80.4637	99.865	101.293	101.542	99.31	95.3333	99.887	16.2275	15.725	14.6576	18.4596	16.0947	25.7663	52.0726	43.8267	31.2816
'aroM'	43.4232	40.5353	46.3615	46.3828	53.773	46.2597	50.8044	45.6057	49.8498	13.8566	14.8783	15.6763	10.4818	9.29242	11.7654	14.4609	12.3869	15.7792
'yaiE'	256.991	262.735	243.134	283.148	280.995	261.088	280.689	303.492	283.294	193.36	216.824	193.831	163.633	178.925	198.836	277.013	275.032	286.24
'rdgC'	95.8678	90.1757	96.8302	92.174	93.6026	96.3863	97.7008	88.4634	92.3908	90.8318	88.1207	106.395	79.3124	60.3097	57.7095	54.726	45.6112	68.3305
'mak'	118.301	102.695	111.392	99.2734	102.794	99.5371	110.804	115.415	95.1394	98.4713	91.0842	75.778	93.2299	99.4836	123.42	143.548	153.787	100.212
'araJ'	53.8881	52.5296	52.4601	50.0508	48.6458	49.1957	53.7355	53.5325	51.9112	22.866	26.2487	23.0899	24.7487	25.2049	21.119	27.0645	28.3955	25.0068
'sbcC'	81.0727	76.4305	86.2511	84.3646	78.9088	82.0644	80.5744	78	79.5223	87.8286	87.0925	88.3982	81.8164	69.1769	62.0039	80.9281	65.6613	69.3916
'sbcD'	51.2418	57.7825	51.7755	56.2036	48.6458	50.3414	54.9423	49.8862	48.5379	48.419	46.7517	48.8963	35.8711	32.6753	35.767	33.9633	34.4315	41.7088
'phoB'	33.9206	31.2551	31.6752	36.6803	32.0762	29.7179	31.7815	28.9593	29.2977	20.4951	17.7209	20.996	19.3331	16.8843	17.354	21.6251	19.0003	19.8394
'phoR'	32.1163	34.0567	32.7331	29.8175	31.576	34.0861	31.6666	32.6057	33.8579	19.336	18.87	22.4674	15.7227	14.8193	15.5892	23.7478	18.6854	18.7782
'brnQ'	243.218	226.49	229.567	261.258	280.745	270.755	284.597	253.447	284.793	152.159	143.703	155.631	84.8444	89.766	103.006	129.618	134.682	144.689
'proY'	107.115	106.372	103.676	104.243	104.42	96.5295	115.632	106.801	122.313	53.3716	55.2795	61.5166	37.6763	39.4169	36.767	44.0461	42.8819	67.2231
'malZ'	66.3978	63.2981	62.6036	61.1732	66.7161	64.6633	72.471	70.8658	68.9026	103.16	89.4513	51.0469	30.1061	34.4366	138.656	58.5071	51.8047	122.681
'acpH'	28.9889	23.7258	25.8878	30.1725	28.5122	25.9226	28.7355	25.6301	27.9858	15.3318	15.3017	12.507	11.1224	11.1752	21.2955	16.1193	16.166	19.4241
'queA'	100.499	104.359	96.3946	76.9102	72.5936	79.2716	93.6778	82.3862	97.5132	63.2767	66.9524	88.9642	49.4392	42.6358	38.9436	36.8157	35.8486	65.6083
'tgt'	189.45	185.429	185.508	169.912	154.941	157.039	172.873	164.138	176.848	206.163	202.369	234.578	158.159	137.868	125.773	160.463	149.85	182.522
'yajC'	484.09	506.21	499.46	427.858	465.887	459.589	472.757	466.626	467.763	493.937	484.936	510.752	414.614	373.823	378.671	344.077	347.936	405.83
'secD'	511.455	520.918	506.181	450.457	420.618	436.817	483.677	484.752	493.5	575.865	569.791	577.418	364.942	344.67	379.906	311.905	295.344	437.204
'secF'	244.301	240.673	237.346	235.109	219.281	209.887	247.47	246.577	253.247	274.497	258.253	284.323	137.428	132.645	167.069	186.732	171.633	236.411
'yajD'	88.1094	83.1718	86.5	80.3416	79.7842	84.4275	87.7583	87.8292	84.0825	59.2198	62.1139	54.6688	58.5234	55.1472	59.4155	76.6827	77.5233	70.5912
'tsx'	224.453	213.358	227.389	160.328	154.316	166.707	163.045	166.939	165.854	2612.78	2827.97	3292.07	4227.37	4420.76	4113.08	1159.2	1160.49	1170.38
'yajI'	16.3589	12.432	17.7356	18.1035	17.9452	16.7566	15.4597	14.9024	14.5551	10.59	10.5842	9.56421	13.277	13.4831	15.0598	13.9966	16.7434	13.9798
'nrdR'	109.22	107.423	104.796	105.781	108.234	96.9592	110.747	110.553	105.134	87.9867	86.8506	82.2862	85.4268	85.5146	72.181	99.7671	114.894	93.9832
'ribD'	207.674	200.926	198.452	204.818	183.016	185.612	210.919	211.593	202.772	188.039	191.543	183.022	179.53	169.632	148.774	206.433	210.578	186.628
'ribE'	211.884	224.739	220.171	241.025	230.724	248.556	246.723	250.171	248.124	272.495	256.137	289.643	184.829	174.977	187.659	180.695	172	296.898
'nusB'	158.296	160.653	164.972	188.253	175.7	173.581	189.195	189.24	188.779	224.182	206.361	208.828	138.826	124.142	134.42	128.424	123.922	215.142
'thiL'	95.4468	87.5493	93.532	65.5512	65.9032	64.5917	73.1607	73.4553	69.6523	56.3747	61.5091	57.2155	44.1983	43.7291	39.2378	49.6182	42.2521	43.6005
'pgpA'	105.731	114.865	107.285	115.01	114.049	113.644	129.54	123.87	122.438	90.7791	101.124	94.3405	79.2541	88.855	83.1817	106.069	108.543	97.3974
'yajO'	319.72	296.092	309.782	337.103	360.092	354.395	354.999	338.158	337.892	101.474	114.551	89.3603	133.003	152.627	153.951	236.881	241.388	160.93
'dxs'	198.171	194.009	202.435	219.49	207.651	208.455	234.769	223.114	225.261	304.74	270.229	291.001	197.99	206.316	224.014	240.197	212.73	280.935
'ispA'	128.706	132.9	132.239	130.392	119.989	126.033	142.356	141.203	145.926	164.646	152.775	152.631	150.938	132.28	131.067	126.301	114.054	144.873
'xseB'	50.4599	60.2339	57.0029	62.8297	56.4617	64.4485	60.9193	60.191	57.221	61.8541	55.9448	61.3468	77.8566	64.3789	60.0038	59.6347	60.2026	58.1801
'thiI'	132.916	145.77	137.84	126.961	117.488	114.79	131.839	126.618	131.996	115.436	119.994	132.541	77.5654	66.4439	57.4154	50.8786	47.0809	70.9603
'yajL'	81.193	84.9228	77.6633	81.9981	78.4711	76.0492	83.9652	85.4512	85.894	69.4937	69.7345	67.5154	59.8046	65.8365	58.5331	74.4273	82.4046	75.7125
'panE'	120.105	113.551	111.89	107.083	111.673	104.12	105.689	105.11	101.699	113.013	116.244	124.618	112.738	120.376	104.536	137.312	140.508	123.281
'yajQ'	645.033	646.464	657.774	596.942	608.261	624.721	598.504	598.845	572.835	497.415	540.639	494.906	480.533	503.977	426.556	487.824	510.121	380.5
'yajR'	37.8299	35.4574	38.3338	39.2834	37.2034	36.0911	39.9999	35.6707	34.6075	41.5698	43.8487	45.1612	34.1824	33.7078	31.3549	32.7029	31.7022	43.3698
'cyoE'	223.732	117.841	128.63	61.8832	52.6476	50.7711	46.0918	55.1179	55.9092	681.607	604.265	738.878	368.494	377.831	642.688	341.49	289.571	1254.49
'cyoD'	49.3172	25.3017	27.2568	15.382	11.5049	10.7414	9.82755	10.3577	10.3698	224.919	204.788	248.952	117.804	110.294	157.069	94.0624	62.827	340.36
'cyoC'	71.3295	38.7843	36.7158	18.2218	13.2557	15.7541	11.7816	15.4837	16.8665	323.601	319.763	425.126	174.872	146.735	203.778	102.354	84.3466	487.448
'cyoB'	244.24	130.448	126.016	82.9447	54.836	69.4611	55.2872	54.5366	74.025	1277.6	1249.05	2114.31	734.6	599.999	786.285	349.716	283.85	2132.82
'cyoA'	102.664	50.691	52.8957	44.0163	26.1362	41.5335	29.0804	21.7724	35.7319	492.567	496.669	915.052	328.081	254.357	339.021	128.954	94.8965	798.234
'ampG'	70.1267	75.2048	75.2986	82.4714	82.3478	75.8344	95.2296	86.2439	92.2658	103.582	97.3743	100.849	55.4371	51.9283	65.2982	43.7145	39.7327	76.6814
'yajG'	117.519	121.256	118.362	123.175	105.358	127.894	121.896	129.841	115.941	158.165	154.468	163.723	125.491	100.941	123.42	88.9546	79.8328	110.87
'bolA'	577.853	518.029	521.987	573.395	619.891	590.921	585.86	567.085	560.529	166.332	167.532	169.949	176.968	194.412	208.896	550.908	539.409	288.824
'tig'	2089.12	2269.36	2171.09	1926.31	1735.62	1864.42	1994.82	2035.13	2025.35	2917.31	3013.04	3552.11	2880.46	2601.94	2267.55	1837.4	1819.57	2666.87
'clpP'	960.723	932.925	930.093	893.934	896.259	922.759	918.273	961.788	899.045	1037.56	1064.58	1332.93	613.594	645.429	691.632	955.35	850.185	1510.38
'clpX'	1780.59	1755.89	1786.01	1834.96	1785.89	1780.93	1891.49	1897.15	1869.3	1630.18	1697.64	1769.72	834.876	865.653	1050.18	1471.37	1412.06	2012.4
'lon'	1137.48	1055.32	1078.26	961.733	956.472	961.571	1002.81	1006.13	999.057	3614.88	3305.4	3687.54	634.091	659.458	1416.85	1894.58	1478.51	3702.26
'hupB'	1290.55	1163.62	1258.61	1141.58	1123.54	1232.76	1260.69	1292.07	1220.76	1553.47	1465.57	1408.71	1362.05	1475.13	1576.16	1369.68	1390.59	1455.33
'ppiD'	848.376	843.537	841.477	727.807	725.436	698.049	828.273	834.272	830.955	563.431	561.747	574.023	419.564	417.187	422.674	404.906	389.821	590.521
'ybaV'	9.32215	9.28022	9.02338	7.5727	6.94047	5.2991	6.37929	7.45122	5.43475	7.32344	8.34636	6.90434	7.3955	8.92802	9.2947	12.6699	11.1272	10.6579
'fadM'	10.5852	10.7686	10.268	11.359	10.6296	10.455	11.4942	9.35366	10.3698	5.05792	3.20549	3.45217	4.54212	4.67658	4.35322	8.82249	8.34544	5.2136
'queC'	84.0798	73.9791	80.4015	79.395	78.2835	79.0568	84.7698	87.9878	82.021	77.4494	76.0245	70.0055	58.8146	55.0865	68.8867	66.3345	62.7745	71.2833
'ybaE'	27.9665	27.4905	30.0572	25.0846	27.9495	25.493	28.2183	26.8455	29.4226	170.599	179.87	132.314	160.838	162.83	171.011	234.161	236.507	153.87
'cof'	42.8819	45.7007	47.295	51.589	46.3323	49.1241	45.4021	45.4471	46.2891	38.5666	40.5222	45.6705	27.3109	26.9055	35.8258	34.8256	33.4867	44.8
'ybaO'	25.1397	25.9146	28.5014	24.0197	27.0116	28.5722	27.2413	26.8984	25.1748	20.2844	21.2288	20.5998	25.0981	25.1442	20.8248	23.6814	22.3595	25.2837
'mdlA'	61.8269	63.4732	55.5094	65.1962	62.6518	60.2235	68.5055	62.3577	67.4659	46.2589	43.0624	45.8969	36.6281	43.3039	42.0026	42.5868	43.4068	54.812
'mdlB'	53.1062	65.0491	59.0565	67.5627	58.0874	59.7223	71.1492	72.504	64.7797	43.7299	48.2033	44.9348	32.9012	31.7036	35.9434	45.9035	48.9179	60.3024
'glnK'	2.70643	1.66344	1.55576	0.35497	0.812848	1.00253	1.14942	0.739837	1.12443	0.31612	0.362885	0.452744	0.174697	0.303674	0.176482	0.331673	0.262435	0.138414
'amtB'	40.8972	31.6053	34.1022	33.9588	29.6377	31.6514	35.4597	34.7723	32.7334	21.7596	20.6845	20.3735	15.6645	16.8235	22.5897	20.6964	21.6247	19.6087
'tesB'	72.7729	71.6153	72.0004	73.9521	64.5276	72.8984	75.2871	77.2073	67.5283	73.1817	74.2101	86.1911	77.6819	71.5456	72.6516	92.603	87.3384	87.0625
'ybaY'	214.349	193.309	194.594	181.39	175.7	177.878	171.551	160.069	162.168	54.7414	51.4088	53.9897	84.9027	91.5273	116.301	234.227	230.575	124.803
'ybaZ'	35.6648	41.6734	34.9112	34.6688	32.639	35.7331	34.4826	35.9878	35.0448	24.6573	24.6762	24.6179	23.817	23.6258	21.9426	20.6964	20.4699	20.3007
'ybaA'	22.2529	18.9982	20.4737	24.7296	35.2651	37.8814	30.862	26.1057	29.2977	3.26657	2.35876	2.71646	3.02808	2.49013	3.35315	7.16413	6.24596	3.32194
'ylaB'	68.8637	70.127	69.4489	80.4599	83.5983	80.9186	81.5515	75.939	75.3994	33.7721	30.18	34.6349	57.3588	58.7306	50.7679	87.0972	92.9545	59.0567
'ylaC'	52.3845	40.2727	41.5698	35.6154	31.0133	36.2344	36.0344	32.0244	35.6695	29.7153	32.5387	51.3864	57.7082	42.3322	29.8842	27.5952	27.6082	54.1661
'maa'	34.3416	33.3563	33.6043	30.7641	28.4497	29.5747	30.8045	29.6463	30.2347	45.4686	48.5057	53.5935	59.6299	43.6076	37.8847	35.2236	31.3872	34.742
'hha'	62.9095	54.7183	65.2795	51.589	56.1491	55.927	58.8504	54.378	59.7823	35.7215	40.6432	42.2184	39.1321	31.9465	31.6491	55.6547	45.3488	39.7249
'tomB'	85.7638	86.5862	85.5043	83.1814	86.7247	84.9288	84.6549	79.4268	89.5797	35.8269	37.0748	41.6524	35.4635	31.825	36.9435	72.3046	60.1501	60.2102
'acrB'	1033.86	1048.31	1036.76	987.882	946.468	950.902	1074.82	1089.73	1070.15	880.078	857.014	896.885	673.456	672.638	568.389	882.913	847.875	874.962
'acrA'	328.801	311.413	329.509	303.145	284.81	308.995	331.091	339.585	326.522	202.844	176.362	201.471	173.241	149.893	173.482	193.896	158.196	212.789
'acrR'	87.087	104.446	93.2831	90.8724	94.4154	97.174	95.0572	87.7236	89.7046	47.3126	51.8926	53.3106	58.2323	53.0215	53.9446	55.0577	49.7577	54.4429
'mscK'	301.076	306.072	292.731	258.063	256.36	232.587	283.332	273.37	272.987	125.236	130.034	130.447	97.772	91.2237	90.241	100.895	94.1092	103.949
'ybaM'	9.20187	10.681	8.77446	8.63761	9.12891	8.73635	9.9425	9.61788	10.4322	8.00837	8.28588	8.94169	7.80313	8.1992	7.82402	8.62349	8.45041	8.53554
'priC'	28.5679	28.7162	30.4928	29.6992	28.2621	25.2781	28.4482	26.6341	25.5496	30.8217	35.9861	32.4844	33.6	29.3956	27.8253	31.2436	33.5917	29.3438
'ybaN'	92.1991	92.7147	102.182	104.598	94.8531	98.6062	109.253	101.146	107.508	16.1748	17.9023	17.5438	15.3733	12.0255	16.7658	21.5587	21.3622	17.3479
'apt'	291.453	315.09	304.119	202.451	192.645	206.164	239.884	229.138	240.878	71.9699	71.4279	86.0213	48.1581	37.2912	37.8847	32.7029	31.8071	47.9374
'dnaX'	372.285	385.304	377.8	368.104	338.958	339.142	396.55	391.638	400.11	292.78	299.018	311.658	176.677	178.074	218.367	192.834	174.939	290.531
'ybaB'	223.852	237.959	224.153	228.128	195.084	194.062	231.666	232.097	228.759	229.608	235.815	222.976	203.813	182.083	148.009	171.939	178.561	179.615
'recR'	255.968	285.148	270.515	264.571	230.286	240.393	280.804	286.581	280.795	282.506	296.054	291.51	223.728	204.008	189.953	213.133	212.153	229.445
'htpG'	505.14	494.216	457.89	435.43	388.291	375.52	340.574	338.423	328.771	6324.29	5781.31	5305.03	670.487	720.254	3363.98	4778.01	3849.03	5077.17
'adk'	583.988	584.741	600.646	599.427	590.253	576.026	644.481	658.085	641.176	341.831	345.467	404.979	348.462	283.632	205.013	189.783	147.646	322.597
'hemH'	74.9381	77.7437	71.4403	74.5438	71.093	77.4814	80.2296	73.4024	73.7127	59.4305	57.3359	57.9512	77.3325	74.7645	68.6514	99.2365	96.2612	74.0516
'aes'	17.0806	15.5838	15.9932	15.0271	15.5692	17.8307	15.977	14.6382	13.9305	28.0293	30.059	26.2025	35.4052	35.2869	35.4728	34.693	36.5835	27.083
'gsk'	142.058	139.378	135.973	118.678	117.488	118.514	128.275	119.008	136.244	71.4431	74.573	83.7576	62.7744	63.4679	50.8267	49.6846	49.3378	68.1459
'ybaL'	204.606	187.53	181.152	202.57	185.329	189.55	202.643	208.845	199.961	175.13	188.459	207.3	181.801	181.779	140.479	213.266	215.722	227.045
'fsr'	37.7096	34.8446	37.7115	38.4551	31.7011	33.6564	34.0803	39.0528	30.2972	68.598	61.9929	68.3077	51.652	53.5681	55.18	72.6363	67.7607	85.1708
'ushA'	308.774	282.959	282.587	244.456	253.484	259.799	253.447	266.553	231.445	147.997	148.541	133.503	195.195	204.069	189.777	260.894	278.916	192.626
'ybaK'	72.8932	69.6892	74.3651	66.4978	57.9623	57.0011	62.586	62.6748	62.9681	34.299	34.7765	36.6722	36.2787	30.9747	31.8255	28.7229	22.6219	22.2847
'ybaP'	59.9024	62.3351	64.595	66.9711	59.7131	70.3205	69.2526	64.1016	71.214	58.6402	64.5331	63.8369	53.1078	53.2644	47.5324	55.7873	50.9124	52.0899
'ybaQ'	95.9881	92.1018	98.9461	92.2923	104.17	102.903	94.7698	97.0244	98.0754	74.8677	77.8389	88.568	42.9754	38.7488	47.1206	44.1125	41.8322	43.6005
'copA'	665.782	658.37	642.838	841.753	814.474	811.263	822.641	839.662	805.218	184.034	178.298	160.95	152.452	168.6	171.717	223.813	229.263	138.599
'glsA'	167.257	139.378	163.23	204.7	207.902	215.258	180.517	192.675	171.226	3.74075	3.08453	3.2258	4.83328	6.31642	4.82383	13.0679	13.0693	4.06015
'ybaT'	363.925	361.491	361.807	456.492	493.524	448.776	444.596	424.032	402.546	13.3824	13.5477	11.6016	14.8492	16.3984	13.9421	22.2884	31.7022	12.1804
'cueR'	124.616	121.518	124.647	150.389	149.001	138.063	142.298	139.882	134.557	39.4096	41.7923	37.3514	44.373	45.4296	42.4733	52.6696	50.1251	37.418
'ybbJ'	55.2112	54.1054	49.5975	52.4173	54.2732	47.1906	54.0803	49.4634	48.6004	22.023	24.0109	23.5427	28.3009	30.7318	26.1193	36.0197	46.9234	30.0359
'qmcA'	87.8087	84.485	81.6461	77.2652	70.4052	75.1183	76.7814	76.0447	66.7787	47.8395	44.8768	45.5008	71.1599	75.0075	50.8267	98.6395	93.2694	73.4518
'fetA'	43.1225	32.6559	40.2007	34.1955	37.8287	39.1704	39.9424	36.939	37.0438	38.9881	43.9696	42.8975	45.6541	46.948	44.591	48.0262	46.2936	42.5854
'fetB'	33.3192	33.2687	34.3511	31.5924	32.0762	31.3649	31.9539	33.2927	29.9848	35.3	40.6432	37.0684	36.0458	35.955	35.3552	40.1324	41.9371	37.1873
'ybbN'	342.755	356.15	336.728	337.932	326.765	305.128	325.229	324.419	314.966	865.589	894.875	1108.03	168.291	171.454	442.969	458.372	351.663	1059.24
'ybbO'	96.0483	103.833	93.1587	83.5363	82.7855	75.1183	89.8848	90.6829	90.8915	79.5568	82.1331	95.3026	45.3047	50.7136	60.1803	55.1903	47.8157	86.9241
'tesA'	84.0197	82.9091	83.6997	80.9332	80.4094	77.4814	77.6434	84.3414	76.7112	55.7952	54.9771	61.6297	42.6843	39.1132	43.238	51.1439	49.0754	62.0095
'ybbA'	40.2958	33.4438	35.0356	40.8216	40.3298	35.4467	43.2757	43.8618	41.5415	19.6521	16.2089	16.6383	17.3532	19.2529	20.4131	27.3962	24.5114	31.5123
'ybbP'	89.2521	85.0103	89.4248	93.5938	95.791	90.8724	95.1146	104.634	95.6391	42.3074	43.6067	36.5025	29.3491	31.3392	41.7673	64.0128	61.1999	67.9152
'rhsD'	80.5314	74.7671	80.4637	68.8642	65.403	60.2951	74.3676	72.6626	75.7117	57.0596	61.6905	53.1974	40.0056	43.7898	59.8861	70.5136	70.3851	48.6295
'ybbC'	3.06729	2.36383	3.48489	2.12982	1.68822	2.21989	3.44826	3.85772	3.5607	1.68597	1.08866	1.52801	0.815252	1.03249	1.2942	1.59203	0.997253	1.70711
'mnmH'	25.0796	25.827	28.0036	29.4625	32.1388	30.7921	33.2758	32.7114	30.2347	38.1451	38.9497	36.2195	31.329	31.2177	36.0611	28.9219	25.2463	31.6968
'allS'	3.48829	3.76462	3.54712	3.31306	4.87709	4.15335	3.56321	3.96341	3.18589	5.47941	5.3828	4.69722	5.53207	6.25568	5.64741	6.03644	5.77357	5.07519
'allA'	5.29258	4.37746	5.10288	5.91617	5.3773	4.01013	5.05745	4.80894	4.49772	9.22016	8.83021	9.90377	8.26898	7.71332	7.94168	7.62847	7.87305	6.82843
'allR'	345.762	343.018	356.455	374.02	343.835	375.019	362.47	366.219	349.198	180.188	165.899	161.573	154.49	154.631	172.011	233.63	228.371	209.236
'gcl'	11.7279	11.7316	12.446	11.1224	11.0672	10.6698	12.7011	11.4675	10.2448	6.79658	6.9553	5.43293	5.24091	5.28393	6.58865	9.2205	8.76533	7.61278
'hyi'	1.62386	2.01363	1.61799	1.18323	1.31306	1.5038	1.83907	1.26829	1.24937	0.895673	0.967694	0.962081	0.291161	0.911022	0.823581	1.19402	1.36466	0.692071
'glxR'	4.14986	3.41442	3.85827	2.24815	3.62655	3.36564	2.47126	2.9065	3.18589	2.26553	1.99587	1.75438	1.10641	1.45764	2.00013	3.6484	2.62435	1.70711
'ybbW'	0.601429	1.22569	0.497842	0.473294	0.687795	0.358047	0.804595	0.739837	0.687152	0.579553	0.66529	0.396151	0.640555	0.668083	0.764754	1.32669	0.367409	0.645933
'allB'	7.33744	5.95335	7.09425	6.0345	5.43983	6.65968	5.57469	5.70732	5.87203	3.9515	4.41511	3.90492	5.00798	4.31217	5.35328	6.23545	7.71559	4.70608
'ybbY'	7.45772	8.22963	7.59209	6.62611	8.44112	9.73888	9.02296	7.82114	8.4957	2.16015	2.29827	3.50876	2.67869	3.27968	3.47081	2.85238	3.77907	2.49145
'glxK'	15.156	10.2433	12.3216	14.0805	13.1306	16.1121	15.0574	16.4878	12.8685	5.5321	3.32645	2.77306	6.52202	4.55511	6.70631	6.56712	7.55813	4.52153
'allE'	41.6791	39.9225	42.1921	33.1306	34.2022	37.8814	35.6321	36.8333	32.671	14.0146	12.3381	11.7713	16.8291	18.0382	15.7069	19.5687	14.6439	14.3489
'allC'	18.8849	20.4865	16.4288	14.4355	12.4428	14.0354	14.0804	15.8008	17.4912	10.6427	12.0357	10.2999	10.0742	9.04949	12.7655	9.95018	9.86756	11.35
'allD'	1.80429	1.40079	2.42698	2.0115	1.75075	1.21736	1.55172	1.90244	1.56171	3.58269	2.11683	2.4335	2.56222	3.64409	4.41204	4.17908	3.77907	2.99897
'fdrA'	2.70643	2.53893	2.17806	1.77485	2.68865	2.79277	2.87355	2.43089	2.18639	1.89672	2.35876	1.52801	2.03813	1.5791	1.88247	2.05637	2.57186	2.03007
'ylbE'	6.61572	6.47864	6.28525	4.61461	4.75204	4.65461	5.45975	4.91463	5.12241	4.53105	4.17318	5.20655	2.91161	3.27968	3.94143	4.11274	4.35642	4.01401
'ylbF'	3.48829	2.62648	2.61367	3.31306	3.06381	2.14828	3.04597	2.43089	2.68614	3.74075	2.60068	2.3769	1.86343	3.03674	2.88253	2.78605	3.04425	2.67601
'ybcF'	7.27729	7.35414	6.22302	8.16432	10.0668	9.16601	8.10342	7.6626	8.24583	3.58269	3.93126	3.84832	2.96985	2.97601	2.76488	3.78107	3.2542	3.73718
'purK'	265.531	338.028	310.404	344.676	318.762	300.33	390.688	373.882	384.431	13.5405	14.5154	16.8081	13.3934	12.815	13.295	10.2819	11.5471	11.6268
'purE'	181.331	222.025	219.922	233.925	217.03	213.754	254.827	235.85	240.441	6.21702	8.46733	7.52687	9.14247	6.55936	8.29464	6.10278	7.40067	7.05912
'lpxH'	61.7668	60.3214	65.0928	67.9177	70.9054	63.8756	78.9078	77.1545	78.0855	59.2198	58.3036	60.2149	40.8791	36.0765	40.4731	35.1573	32.437	47.8452
'ppiB'	778.31	780.326	805.819	793.95	803.719	798.803	761.837	777.04	786.415	729.815	766.656	741.368	593.503	560.704	565.683	586.331	526.025	528.281
'cysS'	297.828	306.685	294.785	256.052	244.542	244.689	270.631	275.959	265.116	219.861	217.913	262.478	128.519	120.741	124.184	86.6992	77.6808	161.437
'ybcI'	5.65344	6.0409	3.85827	4.73294	6.31521	4.79783	5.91952	5.54878	6.24684	2.26553	3.56837	3.56536	1.57227	1.3969	2.76488	2.12271	1.46964	2.81442
'ybcJ'	20.4486	24.5138	24.9543	27.6877	23.1974	22.2705	29.1953	28.9593	26.9863	12.7502	11.1285	10.2433	10.1907	9.17096	8.17699	8.02648	10.5499	10.5656
'folD'	322.907	380.577	364.42	406.204	396.232	410.823	435.861	440.784	426.284	113.013	116.184	106.055	160.721	154.388	120.008	115.953	111.482	114.838
'sfmA'	2.16515	2.18873	1.49353	1.41988	2.12591	1.43219	1.72413	2.21951	1.43677	0.7903	0.725771	0.792302	0.232929	0.728818	0.470618	0.796014	0.629844	0.692071
'sfmC'	0.962287	0.612845	0.622302	0.591617	0.500214	0.859313	0.632182	0.264228	0.499747	0.421493	0.120962	0.396151	0.174697	0.242939	0.352963	0.199004	0.262435	0.369104
'sfmD'	9.56273	8.66738	7.52986	7.45438	6.19015	7.08933	7.81607	8.03252	8.3083	3.26657	4.17318	4.69722	4.83328	3.58335	3.8826	4.90876	3.2542	3.73718
'sfmH'	0.842001	0.787943	0.871223	0.709941	0.562741	0.716094	0.919537	0.739837	0.624684	0.15806	0.483847	0.396151	0.291161	0.12147	0.588272	0	0.52487	0.369104
'sfmF'	1.263	0.700394	0.808993	1.06491	1.00043	0.930922	0.919537	0.898374	0.687152	0.63224	0.786252	0.56593	0.698787	0.607348	0.882409	1.45936	0.629844	0.830485
'sfmZ'	2.04486	2.18873	2.24029	1.77485	1.56317	1.28897	1.49425	1.53252	1.62418	0.421493	0.604809	0.56593	0.349394	0.607348	0.588272	0.663345	0.629844	0.645933
'intD'	76.141	74.6795	79.3435	64.2496	72.281	63.0879	69.0802	69.1748	71.8387	63.0659	58.727	55.3479	64.172	60.3097	59.6508	70.978	59.3628	62.148
'emrE'	14.2539	13.8328	15.8065	12.8973	13.5683	15.9689	13.2758	14.5325	14.7425	10.1158	10.7051	12.7334	11.2388	10.1427	8.94174	11.7412	8.97528	8.25871
'ybcK'	2.34557	2.36383	2.61367	1.41988	1.56317	2.21989	2.01149	1.63821	1.81158	0.895673	0.846733	0.848895	0.931717	0.425144	0.588272	0.663345	0.944766	0.784347
'ybcL'	5.83386	4.99031	6.96979	7.21773	6.00257	6.58807	4.99998	5.70732	4.87253	1.73866	1.45154	1.13186	2.32929	2.24719	2.35309	1.79103	2.09948	2.53759
'ybcM'	36.5068	39.2221	42.0676	33.1306	34.8274	37.8814	30.9769	33.1341	33.2957	7.27076	8.10444	6.84775	11.1224	10.4464	8.58878	14.0629	10.6549	7.56664
'ylcH'	0.300715	0.612845	0.248921	0.118323	0.250107	0.214828	0.114942	0.105691	0.312342	0.0526866	0.120962	0	0.116465	0.182204	0.117654	0	0.052487	0
'ybcN'	0.721715	0.875493	0.808993	1.18323	0.875375	0.716094	0.804595	0.528455	0.999494	0.7903	0.967694	0.679116	1.45581	1.45764	1.00006	1.26036	1.57461	1.10731
'ninE'	0	0	0.0622302	0	0.0625268	0.143219	0	0	0.249874	0	0	0	0	0	0.0588272	0	0	0
'ybcO'	0.180429	0.0875493	0.12446	0.236647	0.18758	0.358047	0.172413	0.264228	0.312342	0.210747	0.120962	0.113186	0	0.12147	0.235309	0.265338	0.209948	0.046138
'rusA'	0.721715	0.525296	0.746763	0.946587	0.687795	0.644485	0.51724	0.528455	0.812089	0.526866	0.241924	0.452744	0	0.485878	0.176482	0.597011	0.629844	0.184552
'ylcG'	0.180429	0.350197	0.0622302	0.118323	0.0625268	0.143219	0.344826	0.158537	0.249874	0.105373	0.0604809	0.113186	0.116465	0.12147	0.117654	0.0663345	0.052487	0
'quuD'	3.368	2.36383	3.11151	1.30156	2.43854	2.07667	2.9885	2.9065	2.99848	0.94836	1.5725	0.962081	1.57227	2.06498	1.41185	1.32669	1.36466	1.338
'essD'	4.21001	3.93972	4.35612	3.43138	3.37645	3.58047	4.42527	4.91463	4.7476	1.21179	1.45154	2.60328	1.16465	1.09323	1.2942	1.39303	0.997253	1.52256
'rrrD'	9.92358	10.3308	8.40108	9.5842	7.50321	7.23255	9.77008	10.0406	9.6826	2.89777	3.02405	4.07469	5.29914	4.0085	4.00025	1.99004	3.20171	2.9067
'rzpD'	9.74315	11.1188	10.3302	11.0041	9.31649	6.37324	8.27583	7.71545	8.74558	11.4857	13.4268	16.9779	17.1785	14.5156	8.88291	5.04142	5.2487	4.19856
'rzoD'	0	0	0	0	0	0	0	0	0	0	0	0	0	0	0	0	0	0
'borD'	65.2551	58.5705	61.4835	52.6539	36.5156	43.3237	37.0114	39.1057	36.7314	151.053	156.464	144.312	236.54	208.32	123.831	65.4722	61.6198	40.4169
'ybcV'	6.55558	6.65374	7.34317	5.79785	7.003	7.08933	6.89653	5.76016	7.87102	2.79239	3.20549	2.32031	1.6305	1.03249	1.70599	1.26036	2.36192	0.968899
'ybcW'	29.3498	32.3932	34.2266	24.3746	31.5135	29.8611	28.2758	25.6301	27.6735	31.0324	32.8411	23.769	22.7106	21.0142	23.4721	23.9468	23.3042	14.8103
'ylcI'	12.3293	10.3308	10.3924	9.1109	8.25354	9.81049	8.79307	9.4065	8.37076	7.74494	9.85839	6.96094	9.72479	8.56361	7.23575	6.89879	6.66585	4.56767
'nohD'	3.789	4.11481	4.04496	2.72144	2.62612	2.43472	3.90803	3.91057	3.37329	2.3709	2.11683	1.81098	1.33934	1.88278	2.52957	2.25537	2.15197	2.07621
'appY'	279.364	275.693	324.282	247.769	282.996	309.782	246.436	247.158	222.387	20.4951	19.5353	12.2807	20.6725	16.034	20.8248	32.7693	26.9783	9.64285
'ompT'	2144.7	1995.42	2343.96	1860.04	1999.17	2088.92	1748.16	1721.87	1629.05	1112.79	1029.63	1022.58	1202.26	1171.76	1274.61	999.661	868.555	973.836
'envY'	7.39758	9.98061	9.89461	8.87426	7.62827	7.5906	6.72412	8.77236	6.62165	5.42672	5.01992	3.79173	5.06621	3.94776	4.23556	6.43445	4.82881	4.75222
'ybcH'	21.7116	18.2978	20.7849	13.8438	12.818	12.6033	12.5287	12.7886	13.743	12.2233	11.0075	8.65873	12.1705	10.6893	8.35347	12.0066	12.3345	5.72112
'nfrA'	67.6007	63.3857	65.2173	58.5701	50.1465	49.9118	53.678	52	52.286	56.1113	58.2431	46.4628	65.686	58.6698	41.1202	53.2003	48.4455	29.3438
'nfrB'	35.9655	38.6968	36.1558	37.1536	29.1375	30.7921	29.77	30.6504	30.8594	18.2823	18.8096	19.5812	19.8572	21.1357	19.8248	25.9368	25.2463	21.3619
'cusS'	26.1622	28.366	28.3148	26.2678	24.1979	27.4264	25.747	25.8415	27.736	17.2812	17.1766	16.9779	12.8693	12.3899	11.9419	16.053	13.3842	16.4713
'cusR'	24.4782	23.0255	27.0701	25.2029	23.0099	25.4213	25.2873	22.8821	25.1123	15.1738	14.7573	17.657	14.034	11.7218	13.5891	13.7976	12.7019	16.1483
'cusC'	4.57086	5.07786	5.60072	3.43138	2.68865	3.72369	4.25286	3.38211	2.68614	2.42359	2.5402	2.49009	3.6104	4.06923	2.70605	2.58705	2.25694	1.98394
'cusF'	2.947	2.36383	2.30252	1.30156	1.93833	1.57541	1.89655	1.63821	1.62418	0.895673	0.725771	1.35823	1.04818	1.27543	0.6471	1.45936	0.839792	0.369104
'cusB'	6.07444	5.07786	6.22302	4.61461	4.25182	3.93852	4.3678	4.12195	4.7476	2.73971	3.26597	3.45217	3.72687	2.91527	2.94136	2.85238	2.8343	2.53759
'cusA'	22.4935	20.4865	21.6561	19.0501	16.3195	18.8333	20.7471	18.4959	16.8665	12.8029	12.3986	14.3746	11.53	11.4789	14.648	15.0579	15.4312	12.9187
'pheP'	68.9238	74.8546	65.7774	58.4518	50.9593	49.4821	61.0918	54.6423	58.0331	44.3622	47.1146	54.7254	28.068	28.1202	28.2959	24.6764	25.4037	28.9747
'ybdG'	114.873	121.693	120.042	104.716	116.487	109.348	119.942	121.862	135.369	146.153	138.138	153.989	82.8063	85.3324	87.2996	107.661	99.043	141.229
'nfsB'	230.648	248.027	255.58	249.426	251.92	250.275	246.149	244.569	241.003	295.783	304.4	299.773	264.666	254.661	260.075	294.525	277.184	276.921
'ybdF'	28.0266	26.0897	26.6345	26.2678	26.6989	26.4239	24.9999	24.3618	22.3637	20.6005	23.8295	21.9015	27.6021	32.1287	23.5897	32.3049	29.2353	24.5916
'ybdJ'	11.1264	11.0312	8.77446	8.99258	10.5045	9.59566	10.2873	9.9878	10.6821	6.00628	6.10857	6.28182	6.52202	8.25993	6.88279	9.48584	9.60512	6.64388
'ybdK'	128.285	124.845	120.851	127.908	139.622	134.554	129.827	122.813	124.749	18.3876	20.0192	14.0351	44.2565	52.2927	62.1804	154.427	143.185	53.0126
'hokE'	2.04486	1.40079	1.30683	1.06491	1.00043	1.36058	0.977008	1.63821	1.12443	0.47418	0.846733	0.735709	0.640555	0.303674	0.764754	0.199004	0.682331	0.599795
'entD'	79.3285	69.339	81.3971	72.8872	67.3413	74.617	78.448	75.5162	79.2724	2.42359	2.66116	3.45217	3.08631	2.49013	2.47074	3.6484	2.8343	2.62987
'fepA'	1592.16	1329.17	1475.35	1216.72	1113.29	1181.41	1242.47	1294.87	1286.47	13.1717	13.7896	12.1675	13.3352	11.7826	12.2361	15.2569	16.5334	14.5796
'fes'	665.662	653.905	682.106	614.69	604.697	584.476	635.86	629.126	595.449	3.05583	3.38693	2.3769	1.92167	1.33617	1.64716	3.11772	5.03875	2.95284
'ybdZ'	76.8627	85.0103	81.5216	85.1929	70.1551	69.2463	77.5285	76.9431	73.8376	0.15806	0.120962	0.339558	0.232929	0.242939	0.294136	0.265338	0.52487	0.138414
'entF'	3357.24	3434.64	3462.99	3511.72	3162.6	3156.76	3485.39	3553.02	3380.1	24.3412	24.0109	24.1086	22.5359	20.832	24.8839	27.9932	33.3293	27.1292
'fepE'	8.66058	10.0682	10.0813	9.5842	7.06553	8.23508	10.977	9.45935	10.4322	0.421493	0.483847	0.169779	0.75702	0.12147	0.235309	0.331673	0.419896	0.553657
'fepC'	123.113	120.205	122.22	115.129	112.486	108.417	124.482	130.634	123.25	1.52791	2.05635	3.2258	1.22288	1.45764	2.41192	5.5721	4.61886	2.86056
'fepG'	97.7323	104.534	99.0083	103.296	88.6005	86.6474	103.161	100.195	98.8875	5.47941	3.87078	4.30107	3.66863	3.46188	3.8826	5.5721	6.98077	3.2758
'fepD'	127.262	128.26	122.033	126.251	109.047	116.365	134.597	131.585	131.246	3.37194	2.11683	2.88624	1.28111	1.3969	2.47074	5.7711	7.87305	2.95284
'entS'	176.279	188.581	172.44	157.843	135.12	136.846	161.953	152.988	146.801	3.53	3.8103	5.09337	2.03813	2.36866	2.35309	3.05139	4.67134	2.62987
'fepB'	281.529	279.107	264.043	261.495	252.233	252.71	265.401	262.114	271.738	6.21702	6.53194	6.90434	5.53207	5.04099	4.94149	7.76114	9.60512	3.82946
'entC'	622.72	636.833	606.309	573.395	487.646	508.355	512.872	503.142	494.063	4.7418	5.98761	5.88567	2.79515	2.55086	3.29433	3.11772	4.0415	4.42925
'entE'	825.762	815.521	776.944	748.396	648.153	669.763	682.124	664.321	656.793	6.79658	9.37454	7.18731	5.12444	3.88703	4.94149	7.42947	7.19072	6.04408
'entB'	785.527	744.519	692.311	679.058	617.577	577.602	590.17	608.992	588.202	6.42777	5.92713	6.73456	4.25096	4.1907	5.23562	5.10776	6.40342	5.2136
'entA'	718.107	658.545	643.025	599.782	554.362	486.228	556.722	558.101	549.597	10.1158	12.7615	10.4131	7.51196	8.25993	10.5889	8.55715	11.0748	9.59671
'entH'	364.406	342.23	345.876	318.29	295.377	268.034	290.286	301.695	298.474	4.42568	4.71751	4.24447	4.07626	4.06923	3.64729	3.98007	5.93103	5.16746
'cstA'	273.35	252.667	252.841	223.75	227.973	212.608	217.815	220.26	227.822	222.812	182.289	383.7	297.159	312.906	278.135	152.636	178.771	593.704
'ybdD'	14.9756	14.7083	13.1306	13.7255	13.3807	12.8897	13.6781	13.1057	13.1808	18.8091	16.8137	18.6757	16.6544	21.1357	19.06	23.7478	30.8099	26.6217
'ybdH'	28.1469	29.0664	30.3684	28.9892	31.7636	29.4315	32.0114	29.9106	31.6715	25.1842	23.9504	24.8443	25.4475	27.2699	25.1781	33.7643	34.1691	26.6678
'ybdL'	16.419	16.4593	14.4374	18.4585	18.0077	16.3986	15.9195	16.0122	16.6791	11.1169	10.947	11.0356	11.53	10.0212	10.7654	12.9352	11.6521	11.0731
'ybdM'	8.9613	8.40473	8.65	7.33605	6.87795	7.51899	7.29883	7.23984	7.37127	5.26866	6.29001	6.11204	5.18267	6.13422	7.1181	8.68982	8.81782	6.41319
'ybdN'	4.93172	4.99031	4.79173	3.90467	4.68951	5.58553	5.51722	5.23171	4.49772	2.52896	2.29827	2.15053	2.03813	2.85454	2.64723	2.85238	2.62435	2.49145
'ybdO'	2.28543	2.27628	2.24029	2.60312	3.00129	2.14828	2.9885	1.58537	1.68665	0.842986	1.08866	1.5846	1.6305	1.33617	1.64716	3.11772	1.67958	2.81442
'dsbG'	54.8504	62.0724	57.1896	54.4288	62.2767	64.8781	56.3217	59.187	59.4699	33.7194	35.0789	40.8601	34.4735	30.3674	40.2967	56.119	46.7134	48.1681
'ahpC'	3650.62	3741.24	3856.47	3599.52	3721.22	3880.3	3526.54	3475.33	3412.71	2807.88	2851.55	2655.06	3052.77	3076.58	3180.79	3571.12	3432.81	2763.76
'ahpF'	749.682	767.457	736.121	624.038	623.392	601.519	647.067	627.805	618.687	699.837	796.231	778.04	465.276	491.588	539.858	631.505	633.728	705.358
'uspG'	292.355	272.278	250.228	231.559	211.716	224.925	207.011	222.057	182.72	180.768	211.623	186.134	350.384	377.224	234.191	582.484	573.578	378.47
'ybdR'	38.5516	36.508	35.5335	38.5734	42.7683	39.4568	40.4596	36.0406	39.9798	12.1179	12.3381	11.262	14.2669	14.8193	14.1774	17.3133	19.4727	14.3951
'rnk'	82.7567	93.0649	89.4871	79.2767	70.4052	82.0644	84.0227	85.5569	79.6472	86.8276	86.6691	93.435	92.5893	81.6883	82.7111	88.8219	86.3936	116.96
'rna'	125.578	118.804	126.887	123.766	131.681	135.055	126.436	128.785	125.874	105.11	108.442	100.283	121.473	112.177	102.477	117.014	105.079	104.318
'citT'	7.81858	8.49228	6.40971	6.98108	8.06596	6.8745	7.98848	7.13414	8.55817	5.79553	5.20136	5.94226	3.84333	3.76556	3.58846	5.30676	6.29844	4.06015
'citG'	3.368	3.32687	2.55144	2.48479	3.81413	2.72116	3.21838	3.11789	2.87355	2.52896	1.5725	2.26372	2.03813	2.18645	2.35309	2.05637	2.25694	1.9378
'citX'	1.263	1.13814	0.746763	0.709941	1.00043	0.644485	0.804595	1.26829	1.12443	0.526866	0.544328	0.848895	0.465858	0.364409	0.352963	1.12769	0.787305	0.645933
'citF'	3.24772	2.27628	2.98705	2.24815	2.18844	2.43472	3.67815	3.11789	3.06095	1.79135	2.05635	2.09394	1.33934	1.51837	1.58834	2.38804	2.8343	1.84552
'citE'	4.75129	4.28991	3.60935	4.85126	2.25096	5.37071	3.21838	4.22764	3.87304	4.3203	4.1127	3.39558	3.37747	2.73307	3.8826	5.10776	4.19896	3.55263
'citD'	0.300715	0.175099	0.373381	0.709941	0.312634	0.644485	0.862066	0.47561	0.187405	0.263433	0.241924	0.169779	0.232929	0.182204	0.235309	0.265338	0.157461	0.0922761
'citC'	6.01429	5.42805	5.10288	4.023	5.1272	5.2991	5.57469	4.22764	5.37228	2.21284	4.23366	2.94283	4.07626	3.94776	3.64729	5.83744	4.19896	3.78332
'citA'	39.3936	34.7571	30.555	32.5389	30.8882	31.3649	34.3102	32.0244	33.608	18.5984	17.5999	18.8455	19.9737	21.1964	21.7073	28.5238	26.2435	21.0851
'citB'	33.9808	32.3057	33.9155	29.2259	22.072	27.9277	30.0574	31.6545	27.2362	27.4497	32.0549	16.129	30.2226	34.0722	48.1207	59.9001	72.747	35.2956
'dcuC'	317.134	288.65	289.308	201.15	175.263	223.565	241.666	279.077	226.698	443.516	518.866	287.888	469.76	580.989	607.215	895.317	993.684	575.388
'pagP'	58.8799	59.4459	70.2579	79.2767	96.7915	89.0105	88.8503	79.4268	90.2044	11.8545	13.8501	10.8659	10.773	8.80655	10.5889	25.1408	24.8264	13.8414
'cspE'	1963.19	2265.6	2283.54	3021.74	2862.66	3141.51	3506.08	3303.74	3620.79	2424.22	2341.28	2993.94	1767.76	1511.57	1516.86	1640.39	1476.98	3272.06
'flc'	25.0195	23.8134	26.6345	22.7181	27.2617	27.7128	28.8505	28.1138	26.8614	13.5932	15.5436	13.6389	15.0822	15.123	15.8245	21.3597	20.05	15.0871
'tatE'	250.014	255.381	234.421	327.283	312.696	307.276	310.631	308.195	295.975	104.214	101.91	90.1526	84.7862	74.0357	93.2412	135.123	123.869	123.142
'lipA'	223.792	213.708	199.386	195.234	166.384	187.187	175.574	185.699	220.076	325.445	345.709	372.155	347.414	350.926	277.37	335.586	302.745	337.177
'ybeF'	13.9532	15.146	13.9396	12.8973	11.8801	12.0304	13.1034	12.0488	13.8055	10.8008	12.822	14.0917	9.66656	12.0255	11.1772	11.0115	11.3897	10.4733
'lipB'	56.4742	56.0315	56.5673	59.8717	66.1533	64.3053	61.5515	61.4065	62.2185	44.731	41.9737	42.1618	38.7245	25.6908	32.4138	25.7378	23.5142	34.6035
'ybeD'	82.5161	82.9091	75.8586	78.8034	74.9071	68.3154	82.1836	75.3049	77.5233	107.955	131.183	247.934	24.2829	19.1315	40.3555	37.081	27.5557	244.993
'dacA'	271.245	287.774	275.618	288.828	293.876	289.588	289.079	287.004	295.6	207.164	202.732	211.941	180.578	167.203	152.48	163.647	139.615	218.787
'rlpA'	253.923	243.737	241.391	244.693	235.226	235.165	247.758	251.175	244.564	237.037	231.823	201.528	220.176	195.323	136.715	173.597	155.152	187.643
'mrdB'	73.0737	84.0473	80.8993	84.3646	83.1606	79.5581	82.4135	83.2317	87.5182	83.0341	77.1132	84.4367	64.6961	49.6203	42.1203	61.9565	51.9097	64.5471
'mrdA'	105.791	118.367	109.774	118.56	107.921	103.046	115.057	104.476	119.377	96.6273	95.9227	113.695	54.6219	52.3534	60.6509	69.0542	56.791	96.9822
'rlmH'	60.8646	65.6619	61.1101	62.5931	56.8368	56.9295	66.5515	61.1951	62.2185	58.4822	63.9888	68.5907	41.5779	34.5581	33.708	32.1059	29.5502	49.7368
'rsfS'	81.3734	79.6698	79.8414	82.1165	76.5328	75.3331	80.9767	79.374	86.8311	75.9214	78.3833	83.1351	48.2163	41.2997	44.1793	38.7394	40.31	60.2102
'cobC'	22.1927	23.7258	23.2119	27.3327	27.5743	27.7128	30.6896	26.7398	29.4226	17.2285	14.8178	14.0351	11.5882	11.2359	10.1771	12.0729	11.8621	13.7491
'nadD'	47.5129	45.4381	54.5759	54.0738	56.4617	48.6228	59.2527	56.3862	56.2216	33.4033	33.4459	28.4097	25.2146	22.5326	22.2367	27.2635	25.3512	24.9607
'holA'	96.5294	97.0046	105.045	105.663	107.546	115.649	111.954	103.419	108.195	76.1849	73.6657	77.023	63.7061	51.5031	59.1214	64.0128	61.8822	64.8701
'lptE'	172.971	179.126	179.41	176.065	175.7	169.571	186.034	186.28	184.344	145.362	148.178	154.895	128.985	109.08	98.4768	116.152	103.242	123.512
'leuS'	1075.72	1098.13	1086.79	1070	1053.39	1046.71	1074.54	1074.56	1083.14	898.992	884.594	907.299	652.027	649.012	689.573	658.901	580.559	702.037
'ybeL'	389.305	336.977	363.425	381.12	394.607	351.459	354.769	349.15	307.532	146.258	148.239	100.622	236.831	275.797	258.663	535.121	518.414	229.075
'ybeQ'	33.4996	29.329	35.0356	34.4321	38.0163	34.4441	38.3332	34.1382	31.609	14.1727	15.1202	10.4131	20.2066	21.1357	21.5308	34.3613	35.5862	19.7009
'ybeR'	0.781858	0.875493	0.746763	0.35497	0.812848	0.358047	0.287355	0.581301	0.249874	0	0.302405	0.509337	0.640555	0.364409	0.352963	0.265338	0.734818	0.415242
'djlB'	6.67587	6.65374	5.9741	4.49629	6.12762	5.72875	5.74711	4.96748	6.05943	2.58165	3.8103	2.82965	3.55217	2.73307	3.41198	2.58705	1.94202	3.2758
'ybeT'	1.38329	1.22569	1.2446	0.591617	0.687795	1.07414	0.862066	1.00406	0.937026	0.421493	0.423366	0.509337	0.407626	0.425144	0.6471	0.597011	0.682331	0.276828
'ybeU'	2.526	1.48834	1.61799	1.65653	1.31306	1.64702	1.60919	1.90244	2.06146	0.842986	0.604809	0.905488	0.75702	0.971757	1.64716	1.19402	1.57461	0.830485
'djlC'	17.3813	15.4962	16.9889	14.9088	14.3812	13.8206	15.5172	14.2154	16.6791	8.53524	9.37454	9.45103	9.31717	7.65259	9.82415	8.22548	7.61062	9.55058
'hscC'	13.8329	12.9573	14.6241	11.5957	11.6925	11.3859	11.954	12.0488	11.1194	24.6573	24.8577	23.3163	27.2527	32.068	29.7666	23.6151	22.1495	39.448
'rihA'	38.5516	42.0236	45.1791	49.9325	44.2064	46.0449	55.1148	47.5081	47.1012	545.149	529.692	513.298	643.292	647.251	665.101	642.384	618.979	741.254
'gltL'	30.2519	22.15	23.2119	23.0731	23.5101	17.974	23.4482	22.1423	22.801	26.9229	26.8535	48.387	16.8291	17.1879	29.2371	32.1722	26.401	126.234
'gltK'	15.5169	11.2939	13.3173	12.069	11.2548	12.6033	11.839	12.5772	11.3692	14.0146	13.3663	24.8443	8.38545	10.5071	13.1773	14.9253	12.9118	65.6544
'gltJ'	13.051	14.2705	14.6241	14.5538	12.5679	15.1812	14.9425	13.687	13.868	13.6985	14.0921	24.335	16.0721	12.9972	16.7069	15.9866	15.5362	55.135
'gltI'	103.747	78.3566	85.2554	84.3646	80.3469	88.2944	82.8158	79.004	89.3298	79.2407	78.5042	142.218	141.621	143.638	96.4767	131.143	128.278	248.915
'lnt'	177.903	188.756	180.779	190.382	196.272	165.561	204.827	177.614	194.776	175.183	162.996	131.183	64.5796	66.5653	96.0649	106.732	99.3054	137.215
'ybeX'	311.42	305.109	310.404	330.832	317.261	300.043	312.355	313.902	321.962	363.116	361.615	320.769	165.321	152.444	236.074	266.267	238.029	273.829
'ybeY'	141.576	147.258	141.512	151.336	137.496	136.774	139.425	140.622	133.495	168.545	168.742	184.719	63.1238	60.5526	101.065	127.163	110.905	223.124
'ybeZ'	543.752	533.263	537.482	507.371	527.538	501.624	522.01	507.475	510.117	625.496	630.09	713.864	251.505	238.627	405.379	506	434.802	887.05
'miaB'	184.94	192.346	172.44	154.175	138.247	142.718	147.701	150.927	155.859	140.199	140.195	173.854	115.009	104.525	82.6523	93.5317	78.8355	119.913
'ubiF'	105.791	73.804	103.551	99.3917	101.418	124.958	113.62	119.061	109.632	80.3998	65.9242	53.1408	58.5234	69.0555	75.8871	142.089	111.168	87.5239
'asnB'	3314.54	3280.12	3678.55	1952.93	1579.99	2202.71	2961.66	2860.95	2311.21	189.198	180.415	204.47	114.194	124.142	149.304	204.31	175.779	245.501
'umpH'	260.238	277.619	272.755	249.307	239.978	240.894	263.792	257.78	256.745	220.81	219.425	225.127	201.833	187.063	189.247	185.67	186.434	211.174
'nagC'	204.426	199.087	203.617	192.867	186.33	198.43	213.218	200.179	206.208	212.643	212.59	191.171	296.228	329.729	229.367	320.462	334.972	201.531
'nagA'	176.941	175.536	177.045	164.115	163.57	174.154	172.126	175.236	159.294	263.328	246.339	220.147	640.206	663.771	374.847	597.873	675.246	199.685
'nagB'	159.499	156.713	160.616	180.207	186.705	198.645	180.114	177.032	173.912	264.856	237.509	184.606	802.616	853.688	460.794	727.225	815.123	194.057
'nagE'	215.312	208.717	225.833	197.837	194.646	205.734	231.379	226.232	204.834	998.939	917.979	879.568	2078.14	2401.21	1521.33	1905.59	2376.51	830.762
'glnS'	448.366	395.898	472.141	448.801	459.134	492.458	485.746	507.634	492.064	573.441	506.225	494.34	326.159	331.491	373.729	310.512	253.46	476.375
'chiP'	4.51072	4.28991	6.53417	5.20623	5.06467	5.44232	4.54021	5.28455	4.18538	82.4019	69.4321	52.2919	136.438	143.941	103.536	106.003	109.225	50.2905
'chiQ'	5.89401	4.55256	4.7295	4.96958	5.68994	4.79783	5.63217	5.81301	6.80906	3.26657	3.50789	3.2258	3.7851	3.64409	3.47081	3.58206	4.56637	5.07519
'fur'	232.753	247.677	233.488	242.326	216.03	229.938	230.287	233.789	228.01	181.822	183.439	190.096	199.154	164.531	176.541	187.461	170.793	195.349
'uof'	40.416	35.3699	37.2759	37.2719	41.7679	33.5132	39.5401	36.8862	39.0427	28.9777	27.8212	32.8239	29.582	27.7558	29.1783	24.4774	26.8209	29.1131
'fldA'	334.515	329.798	344.693	318.882	341.396	344.728	320.746	327.748	333.019	239.408	252.992	251.386	286.445	243.607	249.31	257.179	223.647	221.324
'ybfE'	32.5373	34.1442	30.3061	28.3976	25.9486	28.1425	29.885	31.6545	34.1077	26.3433	26.8535	27.2212	19.2749	13.4224	17.4129	14.7263	15.8511	23.4381
'ybfF'	58.5191	57.695	62.168	55.257	55.3987	54.5664	56.4941	52.5284	53.4729	44.046	41.9133	45.8403	47.8087	47.2517	43.4733	40.7294	37.5807	42.5854
'seqA'	235.82	238.484	244.378	240.907	220.344	218.194	225.459	227.976	220.763	271.547	264.785	286.7	246.206	223.504	235.956	254.99	228.109	295.837
'pgm'	840.437	856.319	821.066	783.301	750.071	728.268	797.641	802.089	783.354	773.651	754.62	811.939	621.455	638.626	671.631	754.356	712.774	874.916
'ybfP'	7.99901	9.71797	9.39676	8.16432	9.00386	9.23762	7.3563	7.02845	9.05792	3.63538	3.26597	3.62195	4.71682	2.6116	3.00019	2.78605	3.77907	5.99795
'potE'	15.8176	13.6577	13.7529	13.4889	13.1306	14.6083	14.0804	11.9431	11.4942	6.90195	7.37867	6.22523	7.97782	8.68508	7.3534	8.55715	8.5029	7.01298
'speF'	9.26201	8.31718	7.28094	7.33605	8.25354	9.30922	7.58618	7.6626	6.99646	4.47836	2.90308	5.20655	4.01803	4.43364	3.82377	5.63844	4.35642	4.75222
'ybfK'	0.120286	0.0875493	0.0622302	0.118323	0	0	0.114942	0.0528455	0	0.105373	0.120962	0.056593	0.174697	0.182204	0.0588272	0.331673	0.052487	0.046138
'kdpE'	24.3579	22.3251	21.4694	21.8898	20.6964	19.4062	24.0229	20.2398	20.9894	18.3876	16.6927	14.3746	14.3834	12.2684	14.295	15.3233	17.1108	14.1182
'kdpD'	121.789	122.394	113.321	101.048	99.2925	93.8083	98.7928	95.9146	91.1414	75.2892	67.8596	59.932	75.8767	68.2659	78.7108	87.9596	91.17	49.4139
'kdpC'	10.0439	10.4184	9.95684	7.5727	8.31606	7.66221	8.62066	6.76423	7.1214	5.1106	4.53607	4.52744	6.81318	5.46613	6.94161	8.68982	8.45041	3.92173
'kdpB'	11.5474	11.469	11.7615	11.4774	9.5666	11.0279	11.3218	10.1992	11.9939	11.0642	10.1003	6.67797	16.4215	14.88	17.8835	22.0231	23.4092	6.69002
'kdpA'	2.76657	2.88913	2.55144	1.5382	2.68865	3.0076	2.9885	2.53658	3.06095	6.16434	4.35463	4.18788	8.09429	5.22319	7.58871	7.76114	11.1797	2.3069
'kdpF'	0.180429	0.175099	0.0622302	0.236647	0.18758	0	0.0574711	0.0528455	0	0	0	0.113186	0.174697	0.0607348	0.0588272	0.0663345	0	0
'ybfA'	231.37	225.965	206.604	224.696	233.725	220.056	214.54	221.264	218.327	30.6109	27.5188	24.1652	43.9654	53.3252	29.7078	92.1387	112.322	38.0178
'rhsC'	59.0002	56.907	59.3054	80.6966	76.0951	74.3306	82.2986	79.3211	82.7082	30.7163	31.3291	27.2212	31.9695	32.2502	35.3552	45.1738	42.4095	36.3106
'ybfB'	0.842001	0.963042	0.622302	0.35497	1.00043	1.07414	0.862066	0.792683	0.812089	0.47418	0.120962	0.396151	0.524091	0.668083	0.470618	0.331673	0.472383	0.415242
'ybfC'	2.947	2.80158	3.04928	2.0115	2.43854	3.22242	2.06896	2.9065	2.49874	0.737613	0.725771	0.282965	0.931717	1.27543	1.23537	1.7247	1.67958	0.968899
'ybfD'	2.04486	0.963042	2.55144	2.48479	2.31349	1.93345	2.35631	1.53252	1.43677	0.526866	0.786252	0.622523	0.698787	1.3969	1.00006	1.39303	1.25969	0.784347
'ybgA'	66.6384	69.0764	77.2277	91.109	104.42	100.611	101.264	92.004	98.2003	6.84926	7.13675	5.37633	14.0922	12.5721	19.2953	43.5155	40.625	22.9306
'phr'	113.249	111.45	126.327	147.549	177.138	165.131	190.229	175.447	195.589	20.179	19.2934	15.7894	23.9335	25.2657	36.4729	69.6513	71.1724	42.8622
'dtpD'	30.8533	30.6422	31.1773	26.1495	32.764	32.0094	37.1263	31.7073	38.1057	15.9114	15.4226	13.9785	14.6745	12.2077	17.7658	15.9866	17.7931	17.6709
'ybgI'	341.792	319.38	320.984	356.39	325.89	331.552	307.758	338.898	312.342	204.635	202.188	201.188	146.454	156.392	179.482	236.217	231.205	253.067
'ybgJ'	189.571	186.83	174.12	191.092	195.584	178.164	185.919	190.508	171.663	123.392	110.136	109.055	77.6236	78.5908	96.1825	125.638	125.234	145.658
'ybgK'	307.691	298.105	277.173	286.698	308.132	274.049	287.585	282.037	269.614	185.984	174.004	171.646	122.754	133.495	160.951	213.465	202.652	235.996
'ybgL'	155.89	167.307	150.597	157.134	154.879	146.155	153.275	150.715	146.801	91.1479	89.0884	97.1135	62.8909	70.3916	89.3586	104.742	104.134	120.882
'nei'	57.5568	60.3214	56.0072	65.4329	65.7157	57.4308	57.4711	58.7114	61.7812	45.0998	46.9937	47.7645	29.2326	36.3801	41.0614	45.7708	44.3515	55.2272
'abrB'	56.3539	59.4459	60.3633	53.2455	53.8981	53.1342	58.2182	56.0162	59.9072	123.708	139.771	120.203	157.809	170.847	151.539	202.387	194.884	140.675
'ybgO'	15.8176	13.6577	16.1176	14.4355	13.0681	13.8206	14.0804	13.8455	14.2428	6.00628	6.22953	6.79116	10.4236	6.92377	8.88291	8.95516	8.81782	9.0892
'ybgP'	3.18758	3.76462	2.92482	4.25964	3.87666	3.43725	3.33332	4.1748	3.12342	0.895673	1.45154	1.24505	1.8052	1.27543	1.47068	1.79103	1.31218	1.15345
'ybgQ'	7.57801	6.216	5.10288	3.78635	4.62698	4.583	5.45975	6.18293	4.31032	3.53	3.26597	3.73514	3.6104	3.03674	3.41198	5.30676	3.35917	3.69104
'ybgD'	0.781858	1.05059	0.560072	0.828264	0.562741	0.716094	0.689653	0.528455	0.437279	0.895673	0.423366	0.622523	0.582323	0.485878	0.941236	1.52569	1.57461	1.47642
'gltA'	215.673	135.964	178.912	145.301	137.559	181.1	156.379	165.565	150.799	786.348	605.837	977.134	491.189	535.013	957.707	928.882	634.778	2453.11
'sdhC'	3.90929	2.80158	3.36043	3.31306	3.25139	4.08174	2.93102	3.59349	4.06045	74.0247	63.0816	155.065	72.6157	62.3139	50.4738	37.1473	33.1718	149.995
'sdhD'	0.721715	0.700394	0.684533	0.591617	1.12548	1.43219	0.402298	0.845528	0.812089	29.768	27.2164	59.2528	16.7709	17.4309	15.5892	11.5422	9.44766	56.3807
'sdhA'	18.7646	16.1091	13.504	12.8973	9.81671	13.1045	10.9195	11.8902	10.2448	654.842	635.291	1388	389.69	332.462	409.967	246.366	209.738	1514.67
'sdhB'	25.1397	25.1266	21.1583	21.4165	17.9452	18.332	16.4367	17.5447	17.1788	451.05	478.041	945.612	303.216	278.408	355.905	223.614	200.92	1265.52
'sucA'	268.899	214.145	239.026	193.222	177.326	207.309	197.011	225.122	194.152	1803.25	1456.68	1820.6	729.592	677.072	1249.61	1588.05	1178.91	4017.52
'sucB'	331.688	309.487	318.805	281.61	244.98	274.551	269.827	300.85	271.55	2257.31	1796.65	1642.38	1643.32	1573.64	2158.96	3031.62	2590.44	3640.25
'sucC'	231.37	209.418	218.428	188.844	172.386	168.425	180.861	194.313	175.474	1759.47	1375.88	1207.86	1100.07	1158.33	2005.48	2364.96	2070.35	3006.49
'sucD'	169.723	146.995	151.966	139.267	124.053	126.104	132.471	143.106	133.682	1221.8	944.349	734.577	852.637	892.498	1460.86	1915.54	1654.13	1945.41
'mngR'	29.049	25.9146	24.8921	25.3212	22.5722	25.9226	26.2068	26.4228	24.0503	21.9176	23.5271	22.6938	23.4094	19.1315	20.2366	20.5637	19.6826	22.5615
'mngA'	2.70643	2.18873	1.80468	1.77485	2.12591	1.36058	1.60919	2.21951	1.62418	1.68597	2.23779	2.49009	1.10641	1.09323	2.11778	2.32171	2.15197	2.26076
'mngB'	39.3936	39.3972	42.3788	36.7986	40.2047	41.8199	37.1838	41.0081	41.479	30.4529	29.6961	26.2025	31.6784	32.0072	31.1784	35.4226	34.1691	27.6828
'cydA'	2290.84	2238.11	1994.04	1728.47	1482.01	1527.14	1551.09	1451.03	1645.04	2846.34	2662.13	1843.23	4837.36	4727.23	3165.49	4145.31	4362.2	2057.8
'cydB'	1413.6	1511.71	1380.2	1093.78	1009.37	938.8	954.537	944.931	1009.18	1504.57	1408.66	917.825	2463.28	2375.46	1625.87	2221.21	2397.4	851.109
'cydX'	40.5363	54.1054	43.6856	37.8635	34.3272	31.3649	29.885	31.6545	30.7345	45.3105	42.8205	29.3152	74.5373	78.105	49.1207	68.7889	72.642	24.2686
'ybgE'	128.646	141.655	135.973	102.705	103.357	101.9	94.31	97.2357	108.383	79.0826	71.307	56.7628	130.499	130.519	84.4759	100.629	107.913	41.6165
'ybgC'	80.1705	84.485	75.7342	88.9792	88.0377	72.6836	88.2181	85.9268	86.8311	34.9839	36.8329	40.0112	36.9775	27.7558	28.1782	25.2071	28.133	35.8493
'tolQ'	98.3938	106.635	105.916	100.457	99.5426	101.327	102.299	105.955	106.384	44.4148	46.026	45.8403	33.6583	31.5821	32.7668	30.0495	29.4977	44.2003
'tolR'	39.6342	38.6092	39.5162	41.6498	35.5152	36.5924	41.1493	38.6301	42.6659	17.2812	16.7532	20.9394	12.1705	13.8475	15.648	12.6699	12.6494	19.9778
'tolA'	215.191	220.011	218.801	221.383	232.412	217.406	249.654	242.931	256.995	111.116	118.24	116.695	84.5533	76.5259	79.8874	105.936	99.043	111.516
'tolB'	946.529	985.367	964.693	991.314	941.216	894.975	962.755	969.451	955.517	575.707	532.353	526.315	693.954	635.043	447.558	697.906	630.842	542.03
'pal'	1054.07	1050.07	1006.14	843.883	821.164	746.671	851.204	872.532	858.441	748.098	723.896	685.398	1058.66	1037.17	652.982	969.28	1076.09	654.745
'ybgF'	434.894	440.46	447.746	420.521	415.428	418.056	419.481	424.561	429.97	330.345	318.251	298.019	422.068	389.675	291.842	387.526	406.827	297.267
'nadA'	1639.74	1622.38	1793.54	1999.67	2106.03	2141.55	2050.05	1992.06	2045.15	29.8206	31.0267	21.7317	30.0479	27.027	30.7078	37.6117	36.8459	26.7601
'pnuC'	962.046	925.658	1013.61	1147.38	1266.42	1177.12	1242.41	1206.41	1250.3	24.8681	29.2728	21.7883	27.1945	31.9465	34.0021	55.6547	52.9594	35.434
'zitB'	148.072	157.589	151.842	191.802	180.515	173.581	186.206	182.951	187.655	38.0924	41.6713	32.8239	42.9172	44.6401	43.4145	58.9051	60.675	37.6948
'ybgS'	75.7801	72.4032	74.4274	60.345	58.4	56.4998	52.2987	50.0975	49.2251	7.1127	6.3505	5.6027	12.4035	14.9408	15.5304	57.4457	51.1748	16.8865
'aroG'	519.635	540.792	533.313	518.73	530.602	526.401	565.113	577.073	626.87	253.581	256.681	285.908	232.696	237.959	236.015	263.481	242.857	365.736
'gpmA'	4462.49	4313.9	4528.62	5014.78	5182.91	5231	4845.85	4592.22	4599.11	986.189	871.469	1003.22	976.381	983.843	1155.84	1476.67	1518.29	1196.18
'galM'	533.047	515.227	512.093	457.557	443.565	407.314	449.021	451.248	431.157	1158.47	1205.26	1144.54	1061.11	1134.1	1343.08	1150.17	1207.78	1486.34
'galK'	176.64	172.997	168.831	150.034	159.506	144.579	159.597	148.179	147.988	1242.67	1378.36	1281.49	1406.31	1618.76	1677.69	1376.64	1527.84	1832.51
'galT'	66.5782	66.9752	63.6615	67.0894	60.4009	64.8781	71.609	70.126	68.2155	990.245	1046.74	981.379	1247.92	1315.46	1056.42	1139.03	1260.79	1357.8
'galE'	113.79	120.73	116.059	131.694	114.236	119.731	127.471	126.459	114.942	1567.01	1682.88	1469.21	2084.66	2199.33	1669.93	1852.13	1933.46	2119.9
'modF'	68.2622	63.6483	61.2345	55.1387	57.6497	59.0062	66.0343	62.252	62.3435	151.738	139.832	133.39	130.79	136.532	141.597	115.754	114.002	121.943
'modE'	97.8525	100.857	102.493	87.5593	96.7289	91.7317	90.9767	97.5528	96.0764	76.9752	86.4877	78.7774	78.7883	79.8663	72.9458	71.4423	62.4596	73.3134
'acrZ'	78.3061	81.0706	80.0903	101.522	87.3499	88.1512	90.402	90.5772	87.8306	29.8206	31.692	38.7096	49.8468	46.2192	43.5322	49.4856	51.0699	55.6886
'modA'	41.8595	41.1481	39.205	39.6384	38.6416	39.4568	39.1378	39.8984	36.9813	72.4441	68.4039	61.7429	110.467	104.646	105.477	81.1935	85.5014	79.5881
'modB'	21.8319	21.7122	21.4694	24.493	20.7589	19.0481	22.4712	21.7195	20.4272	30.5056	25.6439	26.5421	28.9414	28.2417	32.2962	32.9683	28.3955	32.3889
'modC'	32.838	32.043	33.9155	32.8939	32.2638	32.6539	34.9424	38.2073	36.4815	44.731	33.8088	33.3333	34.9976	41.907	45.4735	41.9898	39.4702	39.3096
'ybhA'	55.1511	60.9343	59.4299	55.4937	54.961	54.2083	57.0688	56.2276	52.0986	67.9131	64.3517	67.1759	60.678	54.054	54.2975	48.6895	45.9786	62.148
'pgl'	678.593	663.361	673.207	738.102	740.942	727.981	701.607	670.821	636.865	383.875	373.349	359.196	291.627	304.16	347.669	586.066	571.636	390.512
'ybhD'	10.7054	11.2063	9.95684	10.4125	11.0672	10.9562	12.6436	9.45935	10.3073	7.4815	7.98348	6.62138	5.70676	6.01275	7.00044	8.29182	8.81782	10.8886
'ybhH'	0.721715	0.875493	1.05791	0	0.625268	0.358047	0.172413	0.581301	0.437279	0.421493	0.604809	0.169779	0.232929	0.425144	0.529445	0.530676	0.262435	0.138414
'ybhI'	2.64629	3.67707	3.85827	2.72144	3.37645	3.15081	2.81608	3.27642	2.12393	1.42254	1.14914	1.24505	1.22288	1.33617	1.41185	1.85737	1.52212	1.89166
'ybhJ'	20.5689	15.934	18.8558	16.5653	17.0073	15.3244	17.931	17.3333	15.742	11.5384	11.3704	12.9598	11.0641	11.9648	11.6478	11.2105	12.9118	11.7191
'ybhC'	227.521	208.28	227.327	161.748	157.13	156.753	173.678	182	169.102	174.129	155.013	168.421	109.943	103.128	101.595	69.9166	58.628	66.9924
'ybhB'	103.326	107.773	111.579	154.175	160.506	162.553	141.091	125.614	128.997	53.2135	51.1064	42.9541	66.9671	62.4961	68.4749	141.757	147.751	78.0656
'bioA'	50.2795	43.1618	42.5032	43.0697	39.7045	27.4264	30.6896	29.5935	26.2992	10.7481	12.0962	10.4131	7.91959	7.40965	8.29464	7.03146	6.92829	6.87457
'bioB'	48.5353	35.0197	36.5914	38.6918	28.2621	21.3396	22.8735	22.0894	19.2403	10.3266	9.25358	10.2999	6.46378	5.52687	6.58865	7.16413	4.88129	8.35099
'bioF'	45.4079	40.798	32.2975	33.1306	27.6368	18.1888	21.3218	21.561	18.5531	9.27285	8.52781	9.50762	4.42565	4.37291	5.70624	4.24541	4.19896	6.22864
'bioC'	18.8849	18.2978	14.1263	15.8553	12.3803	9.02279	9.82755	7.97967	7.87102	5.63747	6.16905	4.24447	2.73692	2.6116	4.41204	5.17409	3.83155	3.2758
'bioD'	17.7422	18.2102	14.0018	16.3286	10.8797	9.30922	9.9425	10.3577	9.62013	6.79658	6.41098	5.20655	4.19272	3.82629	3.58846	4.70975	4.98627	4.6138
'uvrB'	373.488	360.615	364.234	332.726	342.209	326.969	345.803	344.394	334.143	185.194	183.076	167.968	196.359	200.06	176.541	253.73	242.647	200.193
'ybhK'	78.4264	82.2087	73.8051	86.1395	74.0317	78.4123	84.7698	76.4146	80.959	97.1015	80.5606	101.867	78.6718	77.6191	84.3583	99.7008	98.8855	104.687
'moaA'	208.034	210.118	196.71	184.23	177.639	187.617	185.287	192.411	175.036	551.102	368.268	561.798	496.605	461.342	382.495	548.985	517.155	414.135
'moaB'	146.147	129.573	121.411	99.155	91.4142	94.9541	91.4365	94.0122	86.6437	305.161	218.699	233.672	234.909	274.278	140.95	375.586	356.964	144.597
'moaC'	77.2235	73.3663	67.2709	64.9596	52.3349	58.9346	51.0343	56.1219	47.4135	166.49	120.72	121.731	126.888	136.896	84.7112	209.683	190.056	77.0044
'moaD'	24.0572	21.2745	19.1047	19.8783	17.445	16.685	17.4137	18.7602	16.6791	48.5244	33.0226	32.6541	31.5037	37.6556	25.4134	54.4607	57.8407	22.9767
'moaE'	84.2602	75.9052	67.3331	68.3909	56.5867	57.574	66.6664	61.6179	57.0961	159.482	113.22	109.224	111.398	127.179	81.1228	195.753	206.484	72.5752
'ybhL'	395.68	387.493	389.188	391.532	423.494	413.544	378.217	391.321	372.374	159.43	182.289	149.632	228.678	250.288	231.073	348.92	363.63	196.041
'ybhM'	9.20187	7.61679	8.33885	6.62611	7.69079	8.02026	8.67813	8.08536	8.12089	2.31821	2.66116	2.71646	3.55217	4.06923	4.17673	5.10776	5.56362	2.9067
'ybhN'	31.7555	28.8913	30.2439	33.3672	34.2022	34.3009	33.7355	30.8089	34.67	3.00314	2.90308	2.88624	4.01803	4.0085	7.7652	14.5936	15.7986	6.13636
'clsB'	77.0431	72.3157	74.6763	77.1469	85.4116	80.489	80.6894	72.3984	75.9616	6.63852	5.74569	4.92359	9.14247	10.2642	15.5892	32.1722	33.6967	14.9487
'ybhP'	77.9452	70.2145	69.9468	72.5323	75.2822	79.3432	77.3561	67.7479	64.9047	6.53314	6.3505	4.52744	10.3653	9.96051	15.5304	35.7543	32.227	15.6869
'ybhQ'	47.5129	49.4653	49.8464	48.8676	50.7092	38.6691	46.4941	47.4553	40.542	115.226	111.708	85.6818	119.609	110.598	131.361	152.569	193.52	156.408
'ybhR'	33.4395	39.5723	37.3381	41.8865	45.3944	46.4745	46.1493	46.9268	44.2276	17.9135	21.2893	22.524	16.305	15.3052	23.7662	35.2236	36.3735	26.2987
'ybhS'	53.1062	53.2299	53.9536	63.8947	58.4625	62.515	69.1952	60.7195	64.8422	25.9745	27.1559	31.8053	20.0319	24.7191	45.3558	53.532	59.7827	33.2194
'ybhF'	174.414	170.196	168.893	174.409	173.637	174.87	196.953	195.793	185.469	121.127	116.789	98.4152	105.575	131.491	147.951	197.876	206.694	126.649
'ybhG'	112.527	94.3781	110.334	108.029	111.735	116.58	122.988	122.76	110.944	79.9256	71.4884	63.8935	87.7561	92.0132	89.1233	150.646	150.06	91.4918
'ybiH'	67.2398	70.5647	67.0842	66.3794	64.7777	65.5942	65.3446	67.4837	63.5304	51.791	52.0741	48.104	65.1619	62.3746	60.1803	75.356	71.0149	48.5372
'rhlE'	106.513	113.551	107.658	101.167	88.788	91.4452	110.459	101.886	120.876	32.8238	36.4095	41.5392	20.2066	22.6541	23.825	25.0081	25.5087	38.8482
'ybiA'	9.08158	7.96698	8.58777	8.75593	10.3169	9.59566	9.77008	9.35366	10.8695	25.8691	28.6679	18.4493	34.1241	34.9832	33.2962	40.1324	39.8901	32.435
'dinG'	54.7301	58.8331	59.1187	52.5356	50.9593	54.1367	59.9423	59.3984	67.7782	88.5662	94.8341	97.2833	90.2018	93.2279	81.711	97.8434	97.4159	134.169
'ybiB'	205.328	203.727	195.154	197.718	170.198	175.3	177.988	183.955	165.291	114.383	107.293	101.528	115.009	113.574	114.948	178.639	178.508	141.229
'ybiC'	193.299	175.886	174.494	159.5	164.57	162.195	163.333	161.443	161.293	83.3503	75.4197	76.5703	99.4025	106.59	118.478	180.695	172.367	128.079
'ybiJ'	24.4782	18.9982	19.9759	16.9203	15.8818	15.5392	13.6206	15.4837	16.6166	13.3297	14.9388	12.3939	15.6645	14.5156	15.7069	17.9103	16.5334	12.5957
'ybiI'	29.1092	24.3387	23.5853	24.7296	24.1353	23.1298	22.6436	22.4065	21.5516	4.95254	3.87078	2.3769	6.17262	7.77405	7.7652	18.5073	18.0555	7.01298
'ybiX'	36.3865	30.3796	23.7719	22.4815	19.0707	20.9816	21.1494	17.7032	20.9269	10.432	9.1931	8.48895	10.1907	8.80655	11.5301	12.5372	9.44766	7.56664
'fiu'	144.102	71.4402	66.8975	62.0015	40.7675	57.0727	53.8504	42.3293	54.0976	9.43091	9.61646	9.62081	11.7047	9.65683	10.5301	11.0115	11.7046	10.6118
'mcbA'	20.5689	21.1869	19.727	24.8479	27.1366	26.9968	21.9539	17.9675	19.3027	3.47732	2.5402	2.20713	3.20278	3.40115	4.00025	9.35317	6.66585	3.09125
'rlmF'	57.4966	62.16	57.1273	55.612	51.7722	53.4922	55.2872	54.1667	55.9092	31.9808	35.9257	32.2014	34.0659	32.3109	30.7666	31.8406	33.0143	27.5906
'ybiO'	88.771	90.0006	90.1716	90.2808	93.9778	89.7266	92.8158	90.3658	86.5187	16.2802	15.967	13.5823	22.7106	21.8038	28.7665	56.119	57.0534	31.6046
'glnQ'	145.426	126.684	118.237	120.572	83.4733	105.123	116.092	114.146	128.81	56.9016	69.674	96.774	58.7564	51.078	45.2381	51.5419	54.3766	88.9542
'glnP'	109.28	88.6874	77.9745	96.9069	59.588	82.7089	84.9422	80.9065	97.0759	34.2463	40.0384	51.3298	34.4735	32.8575	34.0021	39.9997	41.4123	50.7057
'glnH'	475.851	402.639	402.816	284.568	213.154	257.221	266.896	283.833	287.417	167.544	198.982	214.035	267.985	267.112	246.604	293.862	287.209	256.758
'dps'	3372.57	3263.4	3172.93	3667.67	3905.42	3930.64	3283.26	3217.02	3087.44	332.505	340.931	258.064	600.025	682.781	717.986	2013.32	2056.34	691.978
'rhtA'	18.3436	18.2978	16.491	13.9622	15.9443	14.0354	16.4942	14.0569	18.3032	11.433	11.8543	12.79	6.28909	5.70907	6.94161	7.0978	6.35093	10.4272
'ompX'	3814.02	3995.14	3783.85	3698.55	3485.43	3490.89	3125.74	3262.89	3272.22	2055.83	2084.35	1861.8	1968.54	1937.74	1495.33	3196.59	3231.47	1306.31
'ybiP'	29.2896	23.6383	27.5058	25.3212	22.2595	27.8561	26.5516	22.5122	25.2372	16.4909	16.5113	14.884	18.5179	15.123	13.2361	13.6649	13.2792	15.9176
'mntS'	77.3438	69.4266	67.8932	85.0746	83.6608	85.2152	93.3905	81.065	93.0779	19.0199	21.0474	24.6745	21.0801	30.6103	25.3545	31.8406	42.4095	31.097
'mntR'	29.049	29.5916	31.9241	32.5389	31.576	32.5823	34.0803	31.126	36.2317	24.552	24.4948	24.2784	29.8149	27.0877	27.3547	29.2535	28.238	31.9737
'ybiR'	18.2233	13.5701	17.2378	18.5768	17.1949	19.1197	20.4597	21.6667	21.3642	18.0715	13.7292	17.8268	18.1685	14.0297	17.4129	15.9203	12.7019	23.5765
'ldtB'	351.596	388.281	376.928	347.753	334.831	340.002	357.585	344.077	337.829	74.9731	70.9441	85.1158	69.5876	61.6458	68.0631	61.6248	63.7192	82.541
'ybiT'	391.771	375.061	379.791	269.896	284.81	266.244	322.355	314.854	342.764	141.516	140.981	154.952	120.657	118.615	111.713	88.5566	77.6283	128.587
'ybiU'	23.7565	24.6889	20.4737	18.5768	16.8822	19.1197	20.1149	18.8658	18.803	16.5436	17.2371	19.5812	10.54	10.3857	13.5891	31.3762	26.086	29.9897
'ybiV'	35.8452	41.4983	36.7781	34.0771	39.2668	39.6716	34.6551	39	40.1672	19.2306	22.0755	25.8064	16.538	14.3334	17.0011	16.5173	14.2765	23.1613
'ybiW'	21.7116	17.5974	18.7313	22.4815	21.009	22.557	21.4942	21.2967	18.9904	18.493	25.281	18.8455	26.4375	29.6993	34.0021	29.5189	30.5474	20.4392
'ybiY'	3.84915	3.76462	4.1072	3.90467	4.75204	4.65461	4.19539	4.01626	4.24785	11.0642	9.01165	6.73456	13.6264	15.8518	18.9424	11.7412	12.7019	11.0731
'fsaA'	22.734	21.7122	24.1453	25.2029	26.824	22.7718	25.1723	25.9471	25.737	34.4571	33.8088	22.524	55.3207	59.3379	60.8274	51.9399	57.1059	43.6466
'moeB'	59.9024	62.5102	59.6166	62.1198	52.7101	56.285	61.6665	60.191	57.9707	83.7718	74.331	73.2313	106.041	110.598	89.5351	108.324	124.237	87.2471
'moeA'	142.9	132.462	130.87	132.404	126.304	128.682	135.057	142.841	136.493	174.182	141.041	146.972	247.778	250.045	198.836	266.2	278.286	191.288
'iaaA'	625.607	497.192	446.875	376.15	322.075	320.81	312.47	359.931	344.263	129.925	119.692	113.582	125.199	123.109	139.185	165.372	178.613	144.458
'gsiA'	579.658	529.848	476.248	428.686	370.096	362.487	352.355	379.906	409.98	141.042	140.558	131.296	101.208	125.417	147.833	187.196	196.931	171.172
'gsiB'	395.861	370.071	366.598	376.15	348.712	321.383	300.861	352.374	348.449	70.0205	72.819	64.8555	53.3408	61.6458	88.4762	118.341	119.041	96.7976
'gsiC'	142.298	138.065	143.565	154.175	151.69	132.477	134.023	143.845	145.864	21.7596	21.1683	20.4301	13.9757	16.7628	21.5308	35.887	32.332	34.419
'gsiD'	59.9625	57.2572	60.0522	80.9332	71.8433	67.7425	68.448	79.8496	71.9011	9.16748	9.79791	9.50762	7.80313	8.62434	7.64754	15.3896	13.6466	11.8575
'yliE'	57.2561	64.3487	63.5371	72.2956	59.7131	64.3769	62.7009	65.3699	70.7767	14.6996	13.2453	17.374	12.6946	12.3899	11.0007	12.6699	8.92279	8.4894
'yliF'	22.6739	25.2142	22.9007	24.6113	24.0728	23.2015	26.9539	27.7439	29.1727	12.434	11.6728	11.262	11.0641	9.47463	5.1768	6.50078	6.56088	4.47539
'rimO'	57.3162	62.4226	60.3633	41.1766	41.0801	41.247	46.8964	42.6463	45.0397	24.9208	22.9223	33.1635	25.331	21.3787	13.8832	13.5322	10.8648	15.5485
'bssR'	384.313	323.757	312.022	246.941	242.979	256.505	255.172	270.886	262.367	42.6235	46.2679	33.2201	119.959	136.593	102.065	182.42	209.161	94.8598
'yliI'	36.5068	36.508	35.9691	40.5849	50.3341	50.4846	43.2757	40.8496	41.9788	6.95464	7.01579	6.4516	13.277	11.9648	10.5889	19.5024	18.4229	9.8274
'gstB'	200.637	186.567	193.723	172.516	184.016	183.821	183.333	183.955	168.665	71.0216	71.6094	64.2896	62.2503	65.4721	72.0045	90.016	85.0815	89.9231
'dacC'	365.248	328.66	326.335	302.908	316.761	305.557	302.643	300.955	270.863	162.433	162.149	141.992	205.036	218.402	229.25	409.483	415.645	225.431
'deoR'	74.8178	79.8449	81.1482	76.082	74.9071	74.259	74.8273	77.6829	73.0256	50.1577	54.6747	54.1595	52.5838	48.5271	44.7675	48.2252	45.6112	49.783
'ybjG'	47.3325	52.7922	51.8378	45.9095	38.3289	41.8199	42.8159	41.8008	39.0427	40.6214	38.6473	43.9727	38.9574	27.0877	27.4723	32.0396	26.5584	22.8383
'mdfA'	55.2112	53.6677	48.9752	43.6613	46.9576	47.8351	47.8734	49.7805	47.476	17.7554	18.991	21.6751	20.2648	19.1922	18.2953	27.0645	28.1855	23.2074
'ybjH'	19.1856	17.9476	16.1176	18.1035	18.1953	15.1096	19.2528	18.0732	18.3032	10.5373	11.189	11.9977	7.80313	9.41389	8.47112	12.1392	9.2902	13.4262
'ybjI'	78.667	76.1679	78.5968	71.4674	71.5932	78.1259	76.2066	73.0325	72.4009	53.2135	52.6184	52.6881	36.8028	40.3279	41.4732	51.4756	45.9786	57.7187
'ybjJ'	65.5558	65.9246	64.595	55.0204	58.275	54.2083	63.9653	65.5813	60.0946	45.6793	41.7923	49.0095	28.9414	25.6908	27.3547	31.9732	30.39	43.2775
'rcdA'	11.6076	12.432	11.5748	10.8858	11.4424	11.1711	12.4712	11.0447	9.99494	22.9187	22.9827	17.9966	20.6725	20.8928	17.5893	26.9318	24.3015	21.4081
'ybjL'	162.987	165.293	153.024	149.206	141.248	138.063	152.643	152.142	153.672	56.7435	56.0658	54.7254	68.3647	72.0315	61.0627	62.6198	63.2469	60.9484
'ybjM'	99.296	101.119	98.5727	119.507	129.055	115.864	117.873	114.728	111.818	34.8786	36.5909	30.5036	32.4936	26.5411	32.2373	32.0396	31.0198	35.6647
'grxA'	22.9145	25.4768	22.4651	19.76	21.3842	22.6286	18.2758	19.6057	21.1143	14.1727	16.8742	14.8274	13.6264	14.9408	15.5892	18.9717	17.0058	11.9498
'ybjC'	14.6147	13.1324	14.4374	9.93917	10.8797	9.73888	10.7471	11.2032	10.9944	29.5045	29.5752	32.9937	26.3792	25.1442	22.825	29.1209	32.0696	32.8042
'nfsA'	67.6608	64.874	61.7324	51.1157	51.2094	45.9016	52.6435	50.8902	48.3505	132.876	126.163	139.558	118.736	118.615	101.418	136.583	143.027	134.677
'rimK'	69.1644	63.0355	65.964	58.8067	59.0878	53.349	61.0918	64.5244	62.7183	113.961	101.366	113.526	87.6978	96.2039	85.8878	121.658	113.424	122.543
'ybjN'	94.3041	95.7789	103.8	86.6128	88.4129	93.0206	99.0801	96.4431	92.8905	111.801	115.035	114.827	110.874	114.06	110.36	134.991	131.637	129.786
'potF'	25.0796	18.0351	24.7054	25.7945	24.8231	27.7128	22.4137	20.4512	21.8015	2.84508	3.08453	4.07469	4.25096	5.22319	5.00032	5.90377	6.4559	7.01298
'potG'	8.60044	7.44169	8.40108	9.34755	6.56531	9.66727	7.18388	7.50406	6.87152	2.73971	2.66116	3.28239	2.56222	1.88278	2.17661	3.38306	2.30943	2.9067
'potH'	4.02958	2.53893	3.11151	3.19473	3.5015	2.64955	2.93102	3.22358	4.06045	0.737613	0.846733	0.735709	1.86343	0.850287	1.47068	1.52569	1.46964	1.70711
'potI'	10.4047	9.36777	8.58777	7.5727	8.12848	9.02279	8.16089	8.66666	7.49621	2.73971	3.8103	2.94283	3.31924	3.09747	3.35315	4.31174	4.77632	6.27477
'ybjO'	16.1183	15.4087	15.3709	14.1988	15.0064	16.0405	16.6666	15.3252	14.4302	9.90509	10.3422	12.4505	9.78302	7.77405	9.2947	11.0779	8.97528	10.6118
'rlmC'	29.5903	28.6286	28.8126	22.8364	22.8848	22.2705	25.862	22.1423	27.1113	18.493	17.2371	17.657	13.3352	12.3899	13.0596	12.8689	11.9146	14.9949
'artJ'	95.4468	95.6038	101.186	85.0746	80.2844	85.9313	83.6779	78.0528	75.2119	27.9239	23.4666	23.0333	26.7286	27.2092	42.7674	41.6581	35.1138	29.6206
'artM'	188.127	190.157	194.158	180.088	171.511	176.088	187.183	167.52	185.968	55.321	52.4369	49.1793	54.5637	62.7998	84.5936	128.291	133.894	75.8971
'artQ'	169.663	171.947	167.897	141.042	140.748	140.068	157.931	145.959	144.115	50.6319	49.6548	44.0293	50.9533	53.3252	77.5343	106.799	119.303	63.2091
'artI'	356.708	362.717	356.144	303.026	289.061	299.9	275.344	266.976	255.246	118.808	105.055	91.3411	199.038	211.782	216.484	362.85	349.878	138.137
'artP'	259.036	271.403	261.616	223.986	224.971	216.762	219.08	211.488	199.212	86.4588	70.0974	68.9302	116.465	99.2407	138.126	157.147	155.204	95.0444
'ybjP'	303.241	306.948	296.403	312.847	301.879	314.509	275.631	273.845	240.941	51.6329	49.2315	38.7662	114.892	112.359	126.184	287.958	279.126	83.0946
'ybjQ'	116.677	116.265	108.965	105.545	97.3542	104.335	101.436	101.78	96.2638	48.3663	52.1345	46.8024	63.3567	65.7151	66.5336	106.202	105.499	61.7788
'amiD'	155.048	149.972	141.325	131.694	130.431	125.889	133.678	125.931	124.5	79.7149	76.4479	67.9116	97.1315	90.7378	96.712	131.608	150.795	88.3544
'ybjS'	93.1013	92.7147	90.2338	80.3416	85.224	78.9136	92.1261	83.7073	84.4573	43.1504	43.0019	43.7464	46.3529	44.5793	43.0027	49.4856	49.3378	47.2915
'ybjT'	114.813	116.265	118.3	111.697	115.737	119.23	127.241	124.663	125.374	82.0331	85.8224	77.0796	51.652	56.3012	77.7108	80.5965	77.2609	94.9982
'ltaE'	225.536	224.476	234.795	234.635	226.597	231.155	239.482	228.028	228.947	132.56	123.744	120.713	107.904	104.95	119.655	153.631	142.712	171.541
'poxB'	575.327	571.171	582.039	642.97	700.363	670.622	660.228	596.15	602.82	45.1524	42.639	27.6174	86.8243	94.6856	146.774	359.6	351.401	125.588
'hcr'	24.3579	18.5604	19.4158	15.737	14.3812	18.7617	18.5057	21.2967	15.867	35.9323	37.1958	26.3157	26.9033	32.4324	39.7672	45.5055	47.0284	27.4521
'hcp'	14.2539	11.1188	15.2464	11.5957	9.50407	9.8821	11.0919	11.4146	9.05792	78.2397	58.3641	49.1227	41.7525	51.078	78.2402	55.7873	56.3186	42.6777
'ybjE'	27.4252	28.8037	28.377	24.3746	25.8861	32.081	26.6666	27.691	31.3591	7.53419	6.89482	7.30049	11.2971	9.41389	7.64754	7.36313	7.13823	8.76623
'aqpZ'	26.4027	27.2278	26.4478	23.5464	23.0099	22.2705	25.1149	25.2073	24.7375	6.58583	6.47146	8.94169	8.21075	7.95626	10.8242	10.0165	10.6024	9.73513
'ybjD'	104.348	106.81	102.618	87.086	80.7846	84.6423	81.6089	88.5162	75.7742	123.814	113.523	111.941	165.554	175.281	144.95	187.859	191.21	118.713
'ybjX'	324.411	330.674	338.097	269.067	262.675	268.034	255.861	265.549	235.131	318.543	308.09	322.127	259.949	226.419	252.781	233.1	211.995	128.356
'macA'	102.844	93.4151	90.1716	77.9751	80.6596	76.264	91.6664	90.6301	87.2683	32.2969	32.1758	31.6921	34.8811	35.2262	39.7084	47.4955	42.7769	51.7669
'macB'	111.625	98.8431	103.302	95.7237	94.1028	91.1588	107.471	104.317	103.947	54.8468	56.973	79.117	30.6302	35.1047	52.2974	53.9963	50.1776	109.301
'cspD'	497.322	461.735	487.512	453.889	460.385	485.225	447.585	428.789	392.177	410.85	394.517	373.344	769.423	808.259	771.225	1027.99	1050.27	686.949
'clpS'	99.8373	84.1348	97.8881	96.4336	95.5409	98.9642	90.9767	98.3455	100.262	81.7697	76.8107	76.5137	112.272	116.307	120.302	151.707	146.964	120.697
'clpA'	1875.5	1609.86	1659.8	1668.48	1588.74	1606.56	1657.12	1770.48	1630.11	1547.14	1634.56	1617.99	1461.75	1729.91	1705.99	2645.09	2803.86	2704.84
'infA'	293.257	323.845	300.199	337.34	284.935	312.504	343.332	311.207	343.701	152.264	160.274	193.265	146.105	110.537	112.419	112.901	106.391	174.31
'aat'	74.0961	78.5317	79.7792	84.128	75.97	76.6937	80.9193	71.8699	75.9616	38.7774	36.1071	32.3712	46.1782	40.8138	31.0608	40.7957	39.8376	32.6657
'cydC'	159.619	169.758	167.026	152.519	151.753	147.873	159.482	163.821	163.292	126.237	121.385	107.527	140.223	134.102	117.007	150.646	152.265	112.992
'cydD'	112.768	110.137	111.019	100.575	98.4797	104.12	107.069	109.443	106.696	79.9783	75.1778	68.0248	77.9148	84.9073	68.769	77.0144	72.2746	84.8479
'trxB'	288.024	312.551	279.289	278.178	244.105	255.789	263.85	266.183	256.745	363.696	336.576	419.071	347.589	312.177	294.548	279.733	244.747	357.754
'lrp'	657.904	636.658	634.375	594.457	561.365	585.479	624.136	644.927	632.992	299.471	302.223	342.274	257.678	267.598	349.493	333.663	315.29	478.359
'ftsK'	1040.23	1039.65	1048.95	910.381	934.9	892.039	1005.57	996.983	1019.42	647.782	671.399	697.565	497.245	490.191	554.623	706.33	669.21	844.003
'lolA'	181.752	172.735	193.1	184.23	185.642	178.666	186.264	193.837	197.275	123.181	126.284	128.183	117.513	116.125	123.42	169.617	151.11	187.92
'rarA'	206.651	201.713	210.338	183.875	201.524	178.093	225.344	208.581	224.949	113.118	119.268	113.582	80.9429	87.2759	83.1817	100.961	107.966	124.711
'serS'	1798.63	1802.46	1761.61	1729.06	1738.43	1708.46	1852.06	1880.72	1903.66	1911.73	1900.79	1982	1721.7	1838.69	1673.58	2035.08	1826.34	2639.28
'dmsA'	179.827	187.53	179.97	132.641	142.936	149.306	160.114	190.614	164.042	798.571	1124.16	492.189	519.665	614.454	708.103	653.196	645.17	689.487
'dmsB'	35.364	35.6325	33.2309	27.806	24.448	32.081	33.7355	37.3089	34.4826	75.8161	134.933	53.4238	74.0132	82.7815	92.1823	91.21	90.6451	67.7768
'dmsC'	66.5181	64.3487	62.9148	63.8947	60.4634	64.6633	74.2526	77.7886	71.1515	108.587	196.2	85.0026	99.4025	120.012	122.361	106.135	132.53	80.2341
'ycaC'	278.462	293.903	296.9	335.329	399.421	382.609	300.804	260.687	265.366	8.64061	8.52781	4.07469	25.564	24.8405	27.0605	97.8434	93.112	16.1945
'ycaD'	79.509	80.1076	77.9122	88.6243	76.0951	72.5403	76.6664	78.1585	82.1459	12.276	11.4309	11.9411	16.1886	14.5764	15.1774	15.2569	16.3235	10.8886
'ycaM'	15.6973	15.8464	17.6112	10.4125	10.0043	8.66474	11.0919	11.5732	11.2443	22.1811	21.1683	24.5614	19.566	18.099	15.0009	12.5372	11.4422	24.3609
'ycaN'	21.8319	18.9982	22.8385	15.8553	15.6942	17.4011	15.4597	18.2317	15.4922	13.2243	14.334	14.2614	15.0822	15.5481	13.2361	12.3382	13.1218	10.8886
'ycaK'	3.18758	2.71403	3.42266	2.95809	3.93919	3.22242	3.62068	3.38211	4.24785	2.52896	1.93539	1.52801	2.96985	3.52262	2.64723	2.85238	3.20171	2.35304
'pflA'	155.951	164.768	170.884	162.103	168.072	161.694	154.022	160.175	175.661	112.644	119.45	95.4158	172.659	157.485	115.184	151.044	139.93	112.069
'pflB'	16487.2	19905.2	21021.1	23960	25054.2	26177.4	23554.6	23825.5	25783.2	9106.62	10210.3	6667.73	12460	12788.4	7602.6	10948.4	10646.8	4069.7
'focA'	1127.62	1106.45	1256.86	1147.38	1249.97	1298.78	1155.46	1158.22	1425.34	595.148	604.567	551.442	453.979	433.221	524.857	631.505	511.801	492.155
'ycaO'	135.081	149.271	152.028	108.503	99.7302	94.7393	118.563	108.598	120.189	111.221	110.317	153.197	78.7883	62.6783	47.7089	49.6182	44.7714	96.2901
'ycaP'	53.9482	51.7416	54.5759	54.6654	64.0274	59.1494	57.0113	53.8496	59.4074	9.58897	8.10444	6.79116	14.9075	15.8518	21.7661	41.9898	39.5227	17.9477
'serC'	1322.9	1443.16	1463.34	1650.26	1713.17	1702.8	1693.9	1655.07	1704.33	339.987	339.782	358.573	288.25	300.819	321.785	299.633	258.289	309.586
'aroA'	565.163	594.81	631.948	539.673	571.557	550.748	609.596	608.252	642.05	117.913	111.164	117.43	57.7082	57.8803	74.7694	91.4753	64.4541	93.1989
'ycaL'	12.8104	15.2336	10.7036	10.2941	12.818	13.4626	12.3563	11.7845	12.6811	6.95464	5.68521	6.62138	7.86136	6.8023	7.3534	9.08783	8.34544	6.87457
'cmk'	275.094	287.337	296.091	290.957	285.122	289.947	294.539	283.728	296.85	154.477	154.166	187.21	152.51	119.526	132.361	123.382	102.875	154.978
'rpsA'	5439.75	5379.55	5886.92	5550.79	5202.23	5802.51	5948.95	6097.1	6193.99	5488.74	5480.05	6565.86	6918.64	6292.31	3925.13	2761.64	2579.84	4261.73
'ihfB'	1017.02	993.596	986.722	971.909	938.902	975.893	969.709	941.601	908.853	257.532	266.056	266.666	282.31	274.096	290.901	340.429	345.26	312.493
'ycaI'	23.7565	20.399	23.3363	22.8364	22.6972	25.7794	23.6781	23.6748	24.0503	13.6458	14.213	14.884	17.4115	15.1837	15.1186	18.9053	20.8373	15.4101
'msbA'	252.66	264.836	256.886	228.838	229.098	224.424	244.195	231.305	257.932	147.365	151.807	173.91	80.0112	84.2999	97.7709	89.9496	77.8907	153.178
'lpxK'	78.3662	78.4441	75.8586	75.727	77.7833	71.3946	89.1376	86.6666	93.2028	54.2672	49.2919	58.7435	31.7948	22.0467	31.2961	36.2187	35.0613	47.5683
'ycaQ'	21.2906	20.399	22.5273	24.493	24.2604	23.4163	25.1149	26.5284	27.736	14.6996	15.1202	12.5636	14.4416	11.4181	11.589	14.7263	13.1218	12.3189
'ycaR'	21.6515	19.4359	24.0831	25.9128	24.2604	24.7053	25.2873	23.7276	24.8	16.1221	15.1202	13.073	28.1844	25.5694	24.531	26.1358	21.2572	19.5164
'kdsB'	144.042	142.88	144.125	150.034	147.063	152.17	146.896	163.821	150.424	131.242	126.466	102.943	132.187	133.07	117.125	127.429	138.303	110.362
'ycbJ'	175.617	179.914	178.663	143.29	158.63	161.05	171.091	180.679	152.235	322.653	317.767	224.108	523.101	579.41	475.206	654.258	763.056	499.952
'ycbC'	26.0419	28.4535	30.6173	26.2678	28.6373	28.2857	27.6436	31.813	27.5486	31.0324	32.3573	24.6745	52.2344	54.2362	47.003	57.711	65.6613	45.5844
'smtA'	153.304	131.499	142.196	127.908	122.365	122.524	134.54	132.854	129.622	178.871	172.31	185.116	134.808	129.547	152.421	138.44	127.491	162.775
'mukF'	117.459	103.746	110.148	101.995	97.5418	100.611	108.62	115.626	109.819	145.52	136.566	142.501	87.4067	93.2887	105.242	103.814	93.4269	143.305
'mukE'	73.6149	78.6192	73.3694	76.4369	59.2754	63.6608	69.8848	70.3374	66.0916	102.686	94.0478	112.167	70.2281	65.5329	75.8871	77.1471	71.1724	97.7665
'mukB'	899.558	915.24	900.534	828.382	790.714	792.86	852.526	905.402	868.748	1240.3	1279.9	1329.14	913.024	932.097	841.641	1142.21	1064.49	1235.02
'ldtD'	404.281	388.806	386.014	408.453	408.3	398.22	377.642	391.638	367.876	183.718	181.382	179.626	225.359	226.662	280.606	433.695	410.239	319.091
'ycbK'	370.901	350.985	389.872	417.327	470.514	470.474	443.907	422.658	481.631	164.066	154.529	165.761	160.546	136.107	151.362	165.836	136.939	211.912
'ycbL'	378.961	374.886	397.527	441.701	453.319	415.979	475.113	462.715	510.304	205.583	185.072	194.736	176.094	175.524	178.776	162.918	163.235	238.165
'aspC'	374.45	323.057	379.667	391.887	405.236	459.16	434.884	462.662	452.396	265.014	238.537	200.339	351.199	350.986	301.019	337.908	295.292	290.947
'ompF'	1335.59	1337.4	1396.38	846.131	697.174	817.063	861.951	952.329	882.678	1952.36	2023.03	2070.28	1611.17	1605.52	1786.29	275.753	251.098	351.48
'asnS'	930.592	947.983	919.763	803.298	796.904	804.89	840.687	826.292	874.932	611.007	581.161	750.593	459.919	447.858	393.848	357.808	297.654	482.558
'pncB'	876.463	860.259	883.234	915.232	942.091	917.317	942.123	945.406	973.258	127.396	144.61	154.386	102.722	115.943	113.772	81.8568	78.2581	135.646
'pepN'	540.926	488.7	556.089	554.582	551.236	627.657	579.366	622.52	554.469	634.031	576.746	545.047	446.234	478.226	519.327	733.328	641.496	695.67
'ssuB'	10.0439	8.05453	8.96115	8.63761	10.1293	7.87704	11.7816	9.9878	10.3698	4.26762	4.29414	4.07469	4.54212	3.94776	5.70624	7.76114	6.03601	4.79836
'ssuC'	1.44343	1.66344	1.74245	0.946587	1.25054	1.36058	1.37931	1.05691	1.3743	1.10642	0.544328	0.622523	0.931717	0.911022	1.11772	0.72968	0.997253	0.645933
'ssuD'	5.05201	3.32687	3.60935	4.96958	3.62655	4.36817	3.90803	3.75203	2.93601	2.42359	1.93539	2.88624	1.9799	2.06498	1.58834	2.52071	3.2542	2.21463
'ssuA'	1.62386	2.62648	1.68022	2.0115	2.06338	1.28897	1.7816	1.84959	1.43677	0.7903	1.08866	1.07527	1.16465	1.15396	1.00006	1.32669	1.15471	0.599795
'ssuE'	3.72886	2.97667	3.73381	3.43138	3.87666	2.2915	4.13792	3.17073	3.62317	1.94941	1.75395	2.3769	1.86343	2.30792	1.76482	2.71972	1.57461	1.84552
'elfA'	3.96943	4.72766	4.23166	3.43138	4.18929	4.08174	3.85056	4.7561	2.93601	3.10851	2.11683	1.6412	3.26101	2.97601	2.47074	3.8474	4.67134	3.09125
'elfD'	2.526	2.62648	1.74245	2.24815	0.937902	1.86184	1.83907	1.69106	1.24937	0.47418	0.362885	0.962081	2.03813	1.15396	0.823581	1.32669	0.944766	0.784347
'elfC'	16.3589	17.5974	18.2335	13.9622	13.8184	13.5342	15.6896	16.0122	15.9294	6.53314	5.32232	6.62138	8.15252	9.53536	8.0005	9.15417	9.44766	7.33595
'elfG'	16.5994	15.3211	18.1712	16.447	16.1319	16.4702	18.8505	17.0691	17.3662	9.69434	8.10444	6.79116	10.8894	10.0212	10.5889	9.95018	10.0775	8.53554
'ycbU'	4.08972	3.58952	4.29389	2.24815	2.75118	3.36564	2.81608	3.06504	2.49874	1.26448	0.846733	1.18845	1.6305	1.76131	1.23537	1.9237	1.57461	1.66097
'ycbV'	4.51072	3.06422	3.2982	3.78635	4.12677	3.50886	5.1724	3.27642	4.18538	1.63329	1.87491	1.69779	1.8052	1.63984	1.9413	2.38804	1.99451	1.56869
'ycbF'	24.1173	23.0255	23.5853	23.0731	24.8231	21.626	24.7126	22.1951	26.7989	14.0146	15.5436	14.8274	18.3432	16.5199	19.5306	20.2984	16.4284	16.5636
'pyrD'	128.766	129.048	130.621	211.799	176.763	191.77	173.103	199.65	197.775	17.4393	19.2934	18.6191	49.148	34.0722	20.766	30.6466	25.0888	25.8834
'zapC'	102.423	87.2866	101.311	76.2003	85.9118	100.754	96.8388	96.2845	97.6381	46.4169	37.2562	34.8047	79.3124	73.975	71.3574	64.2118	55.4788	52.3667
'ycbX'	156.552	165.818	170.075	139.74	138.309	140.713	158.965	146.118	153.485	106.111	104.209	125.07	64.6378	56.9085	72.1222	57.2467	53.4318	106.717
'rlmL'	170.024	152.598	159.185	152.282	153.003	151.884	157.701	150.451	166.166	135.141	127.554	182.739	90.9588	98.6333	98.9474	100.099	85.3964	141.505
'uup'	152.763	155.925	152.34	160.92	152.128	148.948	159.54	153.411	161.356	183.402	179.931	192.812	196.883	175.524	100.536	153.034	136.256	145.889
'pqiA'	46.4905	48.8525	44.8058	51.7073	50.1465	49.1241	50.2297	45.6057	50.0997	33.4033	33.5064	32.9371	39.2486	34.9832	26.5899	45.1738	44.0366	37.7871
'pqiB'	84.4407	88.8625	84.6331	95.7237	89.3508	84.0695	85.402	89.626	91.891	59.1144	55.8844	59.1397	62.5415	61.1599	51.9445	81.0608	80.5676	61.7327
'pqiC'	33.3192	34.582	41.1342	35.1421	38.8917	34.0861	40.0573	38.7358	42.9158	23.5509	25.8253	24.7877	28.7667	26.4804	22.5308	40.3977	41.9896	30.3127
'rmf'	1367.65	1345.54	1310.13	2038.48	2091.77	2140.98	1710.51	1627.17	1610.37	78.0289	79.0485	49.9716	127.063	153.659	170.599	334.724	323.74	164.067
'fabA'	962.948	1006.55	939.303	663.44	642.9	614.982	724.998	666.805	727.195	1097.46	1091.26	1305.77	657.617	558.882	551.564	389.251	372.343	645.148
'ycbZ'	295.603	297.667	300.448	295.809	294.814	293.455	310.516	304.971	316.527	201.737	201.039	206.621	176.735	171.211	177.011	189.252	183.705	237.565
'matP'	44.8065	46.1385	44.868	42.2415	41.9555	42.6792	45.9769	42.4349	39.605	45.3105	44.393	41.6524	76.459	71.7278	56.8271	71.177	66.3436	58.1801
'ompA'	16549.7	16735.6	16271.3	13885.6	13177.5	13204.7	12132.4	13213.6	12621.7	10003.7	10665.7	9665	14580.7	14172.2	10224.8	17338.1	17114.6	8653.42
'sulA'	66.2174	70.4771	72.3738	67.0894	76.5953	76.4789	69.5975	66.5853	70.7767	53.2135	52.0741	53.0276	66.443	67.4764	56.7095	82.3875	78.4156	69.2071
'sxy'	23.2753	22.8504	23.0252	22.8364	23.9478	24.4904	22.2988	23.1463	23.5506	17.2812	16.0879	15.6763	23.9917	23.5651	27.4723	37.7443	36.426	28.4672
'yccS'	97.4917	103.571	103.489	92.174	96.5414	89.7982	98.7353	97.1301	101.574	50.105	48.8081	56.9891	47.7505	45.2474	41.885	49.7509	44.8764	49.3677
'yccF'	34.7025	33.9691	38.8317	34.6688	34.7649	32.0094	33.3907	30.3333	32.4836	14.8049	14.9993	18.2795	16.6544	13.3617	10.5301	12.8689	11.0748	14.1182
'helD'	236.903	227.453	220.419	225.998	218.906	216.332	215.114	222.532	213.017	134.983	142.07	132.937	182.733	181.84	172.834	207.561	211.785	156.869
'mgsA'	254.765	260.897	250.103	243.746	227.91	242.828	240.746	243.829	238.629	409.164	441.45	396.717	560.078	587.609	569.33	577.177	577.462	543.552
'yccT'	25.0796	25.6519	27.0701	20.5883	20.9465	21.9125	22.0689	20.3455	21.6141	2.42359	3.08453	3.33899	5.5903	6.55936	5.00032	5.63844	6.8758	3.46035
'yccU'	240.091	215.459	236.039	259.365	289.374	279.778	283.217	254.504	278.609	51.106	49.5943	42.2184	77.3325	81.1417	79.5933	123.051	128.173	68.2843
'hspQ'	162.205	165.906	167.275	162.695	155.942	148.59	156.436	156.793	151.861	100.368	124.954	207.64	49.6139	49.6203	72.1222	109.916	97.8358	276.828
'rlmI'	103.386	102.958	102.867	102.35	100.168	100.54	101.839	98.9268	101.199	67.755	73.6053	91.3411	66.2683	59.5201	50.2385	49.5519	40.5725	56.3346
'yccX'	28.8085	29.6792	32.7953	29.2259	29.5752	29.5031	28.9654	29.6992	27.7984	11.9599	9.31406	8.8285	13.4517	13.8475	17.4129	24.8091	25.4562	16.6097
'tusE'	26.0419	29.5041	27.0079	29.6992	27.9495	28.6438	27.0689	27.4268	30.1722	15.5426	16.6322	17.0345	17.1785	12.5721	13.7067	13.5986	13.3317	13.3339
'yccA'	834.182	889.938	904.828	1039.59	1085.09	1094.98	1010.28	918.772	951.706	444.675	459.776	430.955	501.555	486.85	459.97	616.248	561.821	554.164
'hyaA'	119.684	107.51	113.944	133.942	121.177	125.03	139.137	182.423	126.873	2.89777	3.14501	2.26372	3.66863	3.46188	3.70612	7.69481	6.61336	4.6138
'hyaB'	183.737	170.283	172.316	216.295	185.642	202.082	206.609	269.988	189.092	3.1612	4.47559	3.73514	2.96985	3.88703	3.8826	6.03644	6.08849	4.06015
'hyaC'	94.9657	95.0785	93.532	106.491	104.982	97.1024	104.712	134.333	105.072	1.79135	1.99587	2.20713	1.86343	1.94351	1.88247	2.05637	3.14922	2.58373
'hyaD'	117.88	126.596	116.682	137.847	124.991	106.698	138.965	176.451	135.556	4.3203	4.35463	3.16921	5.53207	4.49438	4.5297	5.3731	6.56088	4.06015
'hyaE'	45.1673	48.0645	47.9173	59.8717	47.958	42.6076	54.4251	65.8455	48.9128	1.42254	0.786252	1.01867	0.873484	1.2147	1.23537	1.26036	1.73207	1.06118
'hyaF'	127.022	136.402	129.003	168.611	157.192	139.638	173.16	209.004	169.977	3.00314	4.23366	2.82965	2.96985	3.27968	3.47081	4.57708	5.14373	3.46035
'cbdA'	841.821	779.451	887.901	1080.88	1107.79	987.494	896.261	1008.87	859.94	9.27285	9.37454	8.94169	8.61838	7.65259	7.82402	12.7362	9.7101	11.2577
'cbdB'	515.064	533.438	549.991	696.57	694.047	592.067	595.17	637.264	550.284	6.6912	7.86252	6.28182	5.47383	5.34466	6.76513	8.82249	9.34269	7.79733
'cbdX'	17.4414	18.8231	18.5446	22.7181	21.2591	19.3345	17.816	19.5	17.8035	0.842986	0.483847	0.792302	0.465858	0.789552	0.941236	1.12769	1.15471	0.645933
'appA'	367.052	368.495	363.985	455.072	461.885	390.486	378.849	420.915	355.882	13.4351	13.2453	12.8466	14.6745	13.4831	13.0008	19.9667	17.4782	13.8414
'etk'	67.6608	61.4596	61.9813	58.3335	61.7765	61.2977	55.5745	57.9715	59.5948	30.8217	29.1518	29.7679	36.4534	40.5101	30.7078	37.3463	39.6802	23.8072
'etp'	3.42815	3.50197	3.9205	4.49629	2.06338	2.93599	2.06896	2.21951	2.12393	1.63329	1.5725	1.52801	2.96985	3.46188	1.47068	3.05139	2.4144	1.338
'gfcE'	8.5403	7.70433	9.21007	5.67952	8.44112	7.5906	7.3563	6.28862	7.37127	6.42777	3.74982	5.26315	15.4316	10.2642	5.47093	8.55715	7.61062	5.95181
'gfcD'	16.2386	16.8095	14.5619	13.4889	15.1315	12.9613	15.0574	13.3171	13.0559	9.90509	10.4027	11.0922	13.3352	13.1187	10.8242	10.9452	10.8648	10.3811
'gfcC'	2.70643	2.97667	1.86691	1.65653	1.43812	1.71863	1.72413	1.95528	2.49874	1.05373	1.02818	1.30164	2.44576	2.85454	2.17661	2.52071	1.46964	1.56869
'gfcB'	2.947	2.36383	2.80036	1.89317	1.50064	1.36058	2.01149	1.53252	1.87405	0.7903	0.846733	1.24505	4.01803	2.97601	2.82371	2.52071	1.83705	1.9378
'gfcA'	6.91644	7.96698	5.72518	6.86276	7.06553	5.58553	6.83906	5.65447	6.62165	3.47732	3.93126	2.54668	3.37747	3.40115	3.29433	3.6484	2.93927	3.18353
'cspH'	2.04486	1.57589	1.68022	0.828264	1.18801	1.36058	0.919537	1.42683	1.49924	1.26448	1.63298	1.5846	1.39757	1.3969	1.17654	0.796014	1.2072	2.26076
'cspG'	17.6219	20.1363	17.1133	15.382	18.5705	18.332	21.1494	19.0244	26.1743	22.4972	30.6638	41.0299	12.287	13.6653	15.1186	15.7213	14.6964	52.1821
'ymcE'	1.32314	1.05059	1.49353	1.06491	0.937902	1.00253	0.977008	1.10976	1.3743	1.47523	2.11683	2.77306	1.33934	2.12572	2.00013	2.18904	1.41715	1.84552
'gnsA'	12.1489	11.5565	13.8151	10.5308	8.8788	8.02026	8.21836	10.7276	10.1823	30.3475	28.547	34.069	31.9113	25.3871	29.6489	34.1623	22.5694	25.6066
'yccM'	18.6443	19.2608	17.9845	16.2103	16.5696	16.0405	19.2528	18.2845	14.6801	38.3032	32.7202	24.9009	35.8711	42.8788	52.3562	41.8571	38.9979	33.0348
'torS'	67.5405	68.8137	67.9554	59.8717	58.0874	56.7863	63.5055	67.0081	62.7807	32.455	34.837	29.202	40.8791	36.5624	36.0611	35.1573	36.2685	35.2033
'torT'	27.1245	27.578	27.0701	22.2448	23.7602	25.2781	27.1838	26.3699	24.6125	20.5478	22.4384	18.7323	21.0801	20.5891	21.8249	24.1458	24.1965	21.2235
'torR'	22.4935	25.3017	20.7227	18.2218	16.8197	17.2579	18.8505	19.0244	17.9909	23.4456	26.6721	20.3169	31.2125	28.6668	22.9426	23.5488	19.9976	15.5947
'torC'	4.99186	4.64011	4.79173	4.85126	3.62655	4.51139	4.13792	4.43902	3.93551	2.21284	2.23779	1.98075	2.50399	1.94351	2.94136	3.31673	2.46689	2.26076
'torA'	16.419	14.2705	15.8687	13.6072	16.1319	14.3219	13.908	13.7927	14.3053	7.903	9.61646	9.50762	10.016	10.082	10.8242	11.1442	11.4947	9.78127
'torD'	30.312	32.3932	31.5507	41.1766	41.7054	39.9581	38.1608	34.878	39.0427	6.16434	6.41098	6.50819	8.38545	8.01699	9.23588	11.8739	11.5996	8.16643
'cbpM'	272.568	268.514	244.503	341.363	343.022	286.653	289.712	289.646	258.619	35.3	33.6879	31.8053	41.4614	48.77	51.4738	87.1636	100.618	47.3838
'cbpA'	1063.45	1043.76	984.047	1298.95	1301.18	1234.47	1094.65	1081.17	970.009	118.123	119.994	114.261	189.604	205.891	201.13	381.225	385.465	191.242
'yccE'	3.60858	4.64011	3.85827	3.78635	4.75204	5.37071	3.85056	5.65447	4.24785	2.00209	1.69347	1.98075	1.16465	1.2147	1.47068	3.38306	1.83705	2.44532
'agp'	200.517	177.375	193.785	205.528	234.163	228.148	225.114	201.658	199.337	300.788	332.766	244.651	452.465	523.959	525.445	632.765	707.787	461.473
'yccJ'	317.495	297.142	298.394	342.783	347.524	372.655	328.907	331.236	330.145	43.4138	46.8727	30.447	111.748	123.899	132.714	305.272	308.991	97.8588
'wrbA'	1031.27	904.559	970.418	1062.31	1098.47	1199.46	1063.85	1066.85	990.874	169.177	170.556	117.544	463.238	524.627	559.212	1272.1	1262.79	445.555
'ymdF'	64.2327	62.16	64.5327	114.892	131.369	128.682	87.471	77.3658	87.7056	8.48255	7.923	6.50819	13.8011	13.3617	26.4134	115.886	113.792	27.729
'rutG'	21.4109	18.648	21.7806	21.8898	19.3208	19.1913	20.2298	20.9268	19.74	10.7481	9.37454	8.0928	8.79308	9.47463	11.9419	12.8689	15.1687	11.1193
'rutF'	1.74414	2.80158	1.4313	2.95809	1.31306	1.5038	2.24137	2.3252	2.18639	1.05373	1.08866	1.24505	0.582323	1.15396	1.47068	1.79103	1.46964	0.876623
'rutE'	1.684	1.48834	1.74245	1.89317	1.81328	1.86184	1.43678	2.27236	1.99899	0.7903	1.08866	1.13186	0.815252	0.425144	1.05889	1.32669	0.52487	1.06118
'rutD'	2.28543	2.62648	1.68022	1.77485	1.75075	1.00253	1.66666	2.11382	1.49924	0.895673	1.20962	1.18845	1.45581	1.15396	0.882409	1.06135	1.36466	0.692071
'rutC'	1.08257	0.700394	0.684533	0.946587	1.18801	0.859313	1.37931	1.26829	1.43677	0.7903	0.362885	1.01867	1.04818	0.850287	0.941236	0.995018	0.839792	0.599795
'rutB'	2.88686	2.10118	2.24029	2.95809	1.68822	1.71863	2.06896	2.53658	1.62418	1.63329	1.63298	1.35823	1.39757	1.3969	1.11772	1.39303	2.20445	1.38414
'rutA'	0.721715	1.05059	1.18237	1.06491	1.56317	1.28897	0.689653	1.10976	0.687152	0.579553	0.967694	0.56593	0.640555	0.668083	0.411791	0.995018	0.997253	0.738209
'rutR'	24.1775	26.0021	23.0252	27.451	24.8231	27.498	23.6206	28.2724	26.9863	27.9766	29.5147	35.8799	27.6603	26.9663	22.825	31.5089	31.4397	36.9566
'putA'	187.285	132.287	117.864	70.9941	61.964	64.4485	63.3331	61.7236	69.2774	699.152	729.702	2089.41	198.164	171.515	249.075	261.756	179.348	3066.1
'putP'	134.179	113.726	123.465	106.491	109.735	109.992	113.85	121.439	123.875	126.501	125.498	530.559	34.1241	32.068	52.5916	55.2567	40.625	908.735
'efeO'	58.3988	55.0685	51.091	46.0278	36.8283	40.4593	40.6895	43.3333	47.7883	5.26866	3.93126	8.26257	4.42565	4.12997	4.23556	4.37808	3.83155	6.78229
'efeB'	54.6098	43.7746	39.5784	38.8101	35.2651	36.5208	37.9884	37.9959	41.7289	9.4836	7.31819	12.6768	7.86136	6.92377	8.94174	8.02648	9.76259	13.3339
'phoH'	11.367	8.14208	8.96115	8.51929	6.56531	7.66221	7.87354	7.13414	7.87102	2.58165	2.05635	6.16863	3.84333	3.40115	2.47074	6.36812	4.77632	12.5957
'pgaD'	6.61572	5.60315	4.54281	5.08791	3.75161	4.29657	4.08045	5.07317	4.68513	1.26448	2.05635	1.52801	4.19272	5.04099	2.82371	7.0978	5.35368	4.42925
'pgaC'	8.5403	8.14208	8.08993	6.98108	6.00257	7.87704	9.77008	8.93089	9.62013	2.89777	3.26597	3.33899	7.16257	6.49862	5.94155	8.29182	10.6549	10.012
'pgaB'	10.2243	13.395	13.1928	12.424	11.3173	11.3143	13.6206	13.0528	11.0569	5.37404	4.77799	6.11204	11.1224	9.5961	9.17705	13.3332	9.65761	20.6237
'pgaA'	44.9869	42.1987	40.3252	39.9933	37.8912	35.017	35.9194	36.4106	37.0438	13.5405	15.3621	14.3746	22.3612	22.1075	32.4726	35.3563	28.9728	69.7607
'ycdT'	31.2743	32.4808	31.3018	30.6458	31.0758	31.1501	31.7815	29.4878	33.2957	14.5942	11.6123	17.2609	23.4676	19.3744	29.9431	27.5952	25.7711	44.8
'ycdU'	2.28543	2.45138	2.0536	1.5382	2.31349	2.00506	1.66666	1.58537	1.74912	0.737613	0.725771	0.735709	1.22288	0.789552	0.823581	1.06135	1.04974	0.968899
'ghrA'	215.372	197.686	207.538	165.889	170.886	164.558	168.735	168.577	162.355	88.1974	83.7056	77.2494	144.358	152.262	156.892	205.04	196.354	139.614
'ycdX'	177.241	175.711	178.29	156.424	165.008	159.474	161.609	169.845	169.727	75.8161	78.0808	75.4384	108.429	109.019	93.0059	122.586	124.132	99.3352
'ycdY'	143.441	149.271	147.112	153.939	142.936	137.418	154.367	157.004	151.986	77.8182	75.1778	67.572	79.6618	81.5061	79.1815	91.807	86.6036	82.9101
'ycdZ'	66.0971	63.4732	64.9061	52.7723	52.3974	48.4796	53.6205	54.9065	58.9702	87.7233	100.761	255.97	108.254	111.631	116.125	112.57	121.245	96.3824
'csgG'	67.5405	79.5823	76.9166	66.2611	64.0274	71.6094	71.3791	71.7114	67.5283	4.00418	4.89895	7.07412	3.66863	4.55511	5.76507	5.50577	6.08849	5.39815
'csgF'	23.0347	26.3523	28.1903	19.5234	25.0732	24.6336	24.8275	20.5569	21.8015	0.263433	0.604809	0.396151	0.465858	0.182204	0.235309	0.265338	0.367409	0.369104
'csgE'	26.4027	29.0664	26.6345	21.2982	22.6347	25.9226	24.0229	23.0935	25.1123	0.263433	0.0604809	0.113186	0.349394	0.425144	0.352963	0.265338	0.262435	0.645933
'csgD'	91.1165	100.156	98.6971	77.9751	78.9713	87.7215	82.4135	81.4878	79.4598	2.58165	2.60068	2.32031	3.66863	1.82204	3.35315	2.05637	2.4144	3.73718
'csgB'	2.947	2.53893	3.9205	2.48479	1.81328	2.86438	2.24137	2.16667	1.62418	0.421493	0.241924	0.735709	0.582323	0.607348	0.235309	0.72968	0.839792	0.553657
'csgA'	18.8247	18.9106	21.9673	14.7904	17.7576	17.6875	17.4137	16.8577	18.9279	3.10851	3.08453	3.50876	5.00798	3.27968	3.58846	6.10278	3.72658	2.9067
'csgC'	0.962287	1.31324	1.55576	1.65653	0.250107	1.43219	0.977008	1.10976	0.812089	0.105373	0.181443	0.452744	0.407626	0.425144	0.411791	0.331673	0.157461	0.46138
'ymdA'	3.06729	3.41442	3.2982	2.72144	2.37602	3.65208	2.52873	2.85366	3.18589	1.79135	0.967694	1.07527	2.03813	1.5791	1.00006	1.32669	1.46964	1.61483
'ymdB'	61.0451	57.8701	59.0565	63.7763	66.9037	72.8268	75.5745	67.5366	68.7152	14.2254	15.1202	13.3559	20.2066	23.0792	23.3544	36.086	38.6829	25.6528
'clsC'	65.6761	61.6347	66.3374	72.8872	78.2835	75.1183	79.8848	74.0366	74.7122	22.9714	20.745	19.3548	31.6784	30.3674	25.884	43.1174	41.8322	28.0519
'opgC'	18.7045	18.8231	16.0554	16.2103	19.3208	20.7667	18.6206	17.7032	21.1768	6.42777	5.86665	6.96094	8.44368	8.13846	7.05927	7.0978	6.71834	9.41216
'opgG'	551.21	528.185	570.527	530.207	536.98	524.467	507.585	522.008	494.625	303.528	303.796	334.521	389.865	368.964	314.785	296.913	262.015	345.159
'opgH'	530.521	572.922	571.958	617.412	618.703	591.637	620.745	616.76	624.559	387.932	420.1	461.403	413.275	374.126	290.254	364.11	325.997	541.984
'yceK'	216.334	184.204	178.787	185.886	197.96	158.686	153.965	161.073	140.679	10.5373	10.3422	6.84775	19.9154	19.9818	25.7075	52.2716	57.4208	19.1012
'msyB'	309.856	287.512	281.281	299.477	297.19	293.67	242.988	255.561	214.704	11.3803	12.0357	8.43235	37.1522	36.1372	44.5322	102.62	87.7583	28.0058
'mdtG'	27.2447	23.4632	27.5058	23.783	29.8878	26.8535	32.4712	23.9919	30.8594	9.27285	11.6728	9.28125	15.7227	14.4549	13.1185	17.3796	17.3732	12.365
'lpxL'	100.679	100.069	103.987	90.2808	100.543	106.125	99.2525	96.7601	101.511	84.9309	87.8788	84.5499	94.9769	97.0542	80.2404	109.651	104.817	92.9682
'yceA'	18.8849	13.7452	14.7486	19.8783	15.9443	19.3345	18.1034	14.6911	19.9274	9.00942	8.83021	13.0164	13.5681	14.0297	10.4712	11.2769	9.86756	10.8886
'yceI'	12.0887	12.0818	12.5705	7.45438	8.25354	7.30416	7.75859	7.45122	6.37178	7.69225	8.16492	8.20598	13.9757	14.0297	12.8243	20.829	18.318	10.8886
'yceJ'	3.84915	3.93972	2.92482	2.48479	2.31349	3.43725	3.73562	2.69512	3.31082	1.63329	1.2701	0.962081	1.45581	1.09323	1.35303	1.45936	2.25694	2.44532
'yceO'	0.180429	0.175099	0.311151	0.946587	0.375161	1.07414	0.172413	0.317073	0.687152	0.105373	0.0604809	0.226372	0.698787	0.242939	0.352963	0.199004	0.157461	0.23069
'solA'	156.853	158.814	160.492	151.099	150.752	143.434	145	150.345	143.865	110.905	111.648	137.464	99.8684	88.0655	93.8883	97.7771	88.5456	145.75
'bssS'	322.667	304.409	329.26	348.699	351.463	342.651	329.769	336.415	347.324	92.0962	123.623	190.888	80.5935	89.2194	103.536	201.723	180.188	322.92
'dinI'	25.8013	31.1675	29.4349	32.6573	31.3884	32.2242	32.4137	30.5447	31.7964	15.5952	14.9993	17.0345	25.8551	23.14	20.2954	23.8141	19.2102	20.9467
'pyrC'	243.038	273.854	281.903	492.58	416.303	453.789	378.217	442.845	400.672	34.299	31.7525	35.314	99.1114	74.3394	50.5914	48.6895	45.5062	51.0748
'yceB'	91.2368	96.3042	92.2252	102.705	98.3546	110.207	108.85	106.272	109.882	31.612	33.0831	33.503	41.4032	38.2022	38.1201	46.1025	44.614	55.135
'grxB'	445.599	466.287	475.128	561.09	604.196	653.579	542.527	520.634	501.559	121.759	137.957	115.846	170.271	175.645	152.774	294.393	273.037	158.946
'mdtH'	28.0867	28.8913	27.568	30.8824	30.6381	30.0043	33.793	32.5528	34.9823	5.32135	6.41098	5.14996	14.791	11.7826	9.00057	8.42449	10.235	8.53554
'rimJ'	147.47	145.945	144.187	130.274	129.868	138.994	127.298	128.89	128.248	119.177	122.897	122.184	145.231	148.011	135.361	166.898	162.237	143.074
'yceH'	115.535	101.382	110.77	106.136	100.23	99.3223	96.7813	102.89	96.4512	92.6758	95.076	89.813	102.431	102.945	92.0058	128.556	125.759	111.423
'yceM'	126.18	113.639	121.847	114.774	109.922	110.279	115.804	128.785	114.879	102.844	102.999	96.8872	109.36	112.238	106.889	141.823	143.604	132.324
'murJ'	60.8045	63.123	68.5155	48.5126	48.0831	51.1291	55.9768	52.5284	55.2221	20.9693	22.015	25.4668	19.9154	19.3744	19.8836	22.7527	19.1578	27.6828
'flgN'	8.60044	8.84247	8.33885	7.21773	8.6287	6.65968	8.21836	7.23984	7.55868	6.84926	7.80204	6.56478	6.23085	4.79805	6.17686	6.69979	5.03875	8.58168
'flgM'	9.26201	8.93002	9.58346	8.51929	9.37902	9.81049	9.19537	9.88211	8.93298	7.95568	6.71338	8.48895	9.14247	5.95201	8.47112	8.35815	7.24321	9.31989
'flgA'	9.8033	8.75493	7.15648	5.79785	7.56574	8.02026	6.20688	7.76829	5.9345	23.6563	23.2247	21.4487	21.6042	19.8603	19.4718	16.7826	14.224	25.0068
'flgB'	3.90929	5.42805	4.48058	2.24815	1.81328	2.72116	2.87355	3.38211	2.62367	30.4002	30.1195	30.6168	30.8631	30.7925	31.1196	18.441	19.1053	38.0178
'flgC'	2.04486	1.75099	2.98705	3.07641	1.6257	1.93345	2.24137	2.11382	1.93652	19.8629	19.5353	20.3169	20.7307	20.4676	19.5895	12.3382	12.282	24.9607
'flgD'	6.25486	7.17904	6.90756	5.91617	4.87709	4.72622	5.91952	6.02439	5.05994	47.1545	41.3085	36.5025	41.8108	39.7813	41.9438	30.3149	25.5087	54.6736
'flgE'	12.6902	10.3308	15.3709	11.8323	10.1919	12.3168	15.6896	11.8902	11.1194	69.8098	63.6259	53.9331	56.2524	55.2079	59.6508	50.3479	42.2521	86.3704
'flgF'	6.49544	7.79188	10.1435	7.92767	7.69079	6.15841	9.48273	7.60975	9.24532	36.0903	29.0913	26.2591	26.321	27.5736	32.5315	26.6665	22.9368	45.5383
'flgG'	7.87872	7.96698	8.83669	7.80935	9.37902	7.73382	10.6896	8.45528	8.37076	28.5035	27.035	22.7504	23.4094	23.808	25.7075	22.6864	19.8926	35.8954
'flgH'	3.368	4.64011	3.60935	1.89317	2.93876	3.36564	4.08045	2.80081	3.81057	7.74494	6.83434	6.05545	6.46378	6.19495	7.82402	5.04142	4.30394	9.4583
'flgI'	4.57086	4.55256	5.72518	3.90467	4.56446	3.0076	5.51722	5.70732	6.55918	10.0631	10.2213	7.13071	7.91959	7.77405	8.70643	5.97011	7.34818	13.38
'flgJ'	4.33029	4.81521	3.85827	3.78635	4.31435	4.36817	5.63217	5.12601	4.68513	7.85031	6.83434	5.6027	6.05616	6.37715	6.35334	4.90876	6.14098	8.02802
'flgK'	14.6749	11.5565	14.2507	10.7674	13.7559	12.102	13.1034	14.0569	12.931	11.2223	10.5842	8.48895	8.38545	10.0212	7.58871	12.1392	11.0748	15.6408
'flgL'	22.734	21.0994	21.5317	19.6417	19.6959	21.5544	20.1149	20.3984	19.6775	13.0663	13.6082	11.1488	14.9657	12.9972	12.0008	18.5737	17.3732	16.3329
'rne'	1124.31	1140.33	1111.99	1150.58	1028.5	1052.44	1147.58	1173.28	1160.23	973.596	993.459	1148.89	914.655	947.584	1014.01	1068.52	1063.23	1382.43
'yceQ'	159.74	165.556	166.715	143.763	154.504	176.016	165.919	164.138	162.918	107.691	114.49	131.975	158.45	139.872	134.126	156.948	148.066	157.561
'rluC'	112.407	107.773	109.836	108.029	99.3551	101.041	109.54	101.463	110.881	70.2313	68.3434	84.3801	59.3387	53.9325	55.0623	41.9898	45.0339	62.148
'yceF'	161.243	159.165	161.799	157.488	156.755	172.937	156.206	158.537	153.11	34.5097	38.2844	36.8986	68.3065	65.4721	56.6506	68.8552	67.6558	42.2163
'yceD'	1190.77	1251.08	1196.87	931.797	864.933	880.509	947.985	940.069	987.563	824.967	855.684	962.25	923.622	816.458	682.102	571.538	555.05	648.47
'rpmF'	1166.47	1260.71	1180.69	984.924	878.564	829.165	982.813	967.654	977.693	1119.38	1195.22	1264.8	1254.96	1225.69	788.285	819.696	842.627	887.142
'plsX'	242.376	252.58	253.65	243.865	228.973	229.508	259.654	240.183	255.433	204.424	187.007	187.436	253.543	242.089	174.305	194.758	200.5	157.285
'fabH'	316.292	275.605	317.81	291.549	301.254	312.145	332.125	343.126	330.208	366.172	302.223	319.411	329.304	304.221	254.369	342.419	298.441	301.189
'fabD'	529.739	511.288	532.068	502.401	501.277	503.343	529.366	540.874	525.984	657.108	613.881	626.824	546.161	506.589	386.554	616.513	599.664	568.605
'fabG'	1894.68	1921.27	1948.24	1823.6	1798.71	1800.55	1963.9	1947.94	1932.46	2101.99	2133.95	2096.71	1656.24	1648.95	1495.39	1868.44	1901.13	2017.57
'acpP'	4256.26	4414.32	4428.18	4187.82	3996.34	4353.71	4190.33	4205.6	4173.08	3458.03	3424.37	3629.82	3782.48	3767.93	3395.21	3701.27	3578.88	3462.43
'fabF'	1054.91	1076.59	1072.35	1213.41	1199.83	1152.7	1317.01	1254.18	1338.57	1428.28	1380.78	1519.8	1184.62	1103.86	932.941	1107.32	1164.95	1608.19
'pabC'	38.9125	36.8582	38.9561	36.4436	39.8296	40.889	40.5746	40.4268	40.542	23.9724	24.7367	22.4108	18.4596	20.2247	20.2954	25.4061	24.9313	27.4521
'yceG'	46.9716	46.9264	43.9345	41.8865	44.5816	42.0347	43.8504	44.0732	45.0397	26.9229	25.4625	25.863	24.4576	22.7756	25.531	30.5802	24.8788	25.4682
'tmk'	52.6251	46.3136	50.5309	41.1766	40.2672	45.5436	44.7125	47.0325	45.2271	32.5603	27.7003	31.2959	26.9615	24.8405	25.1192	26.9982	29.1828	31.6046
'holB'	63.9319	67.3254	63.4748	66.0245	59.1503	61.9421	63.1607	63.7845	64.9671	43.9407	42.3366	45.8403	37.3269	36.6838	33.0021	42.7194	37.0558	44.8923
'ycfH'	165.634	172.472	181.899	174.29	178.139	170.932	188.965	176.398	187.405	41.6224	44.2115	46.2365	45.887	42.4536	46.4735	93.6644	88.913	45.6767
'ptsG'	2409.87	2534.03	2675.34	2752.08	2648.45	3038.17	3270.39	3074.87	2898.97	664.379	775.849	1590.43	291.394	315.517	409.673	506	506.237	531.649
'fhuE'	774.34	768.595	777.878	625.103	575.184	590.993	633.446	651.902	644.299	9.79971	11.4309	13.9785	11.5882	10.1427	11.7066	15.655	15.3262	12.1804
'hinT'	241.534	239.272	236.91	207.894	208.777	201.509	209.31	213.232	188.467	153.792	162.754	155.8	151.404	152.87	161.245	194.427	203.125	160.191
'ycfL'	135.141	136.052	120.167	108.976	110.422	100.038	112.758	106.748	105.134	96.1531	92.6567	92.0202	75.4108	80.6558	83.77	96.7821	109.75	88.4928
'lpoB'	320.502	340.829	312.396	306.221	295.064	289.159	309.482	306.821	283.294	187.406	197.712	186.474	151.346	163.377	172.952	223.415	210.42	176.755
'thiK'	59.1205	64.2612	64.2838	67.2077	61.7765	64.4485	68.2182	67.2195	67.216	56.7962	51.2273	51.6128	46.877	45.0652	49.1796	56.119	48.8129	56.15
'nagZ'	142.178	138.503	147.174	143.881	144.374	145.009	147.931	146.276	154.922	129.398	137.231	133.446	126.888	126.389	134.067	177.113	157.251	164.021
'ycfP'	227.761	198.824	200.879	184.23	195.709	205.447	216.034	217.512	206.396	260.957	281.418	246.123	295.529	312.116	316.844	383.215	409.136	349.588
'ndh'	449.448	347.133	393.917	349.409	318.199	344.083	315.401	285.26	361.754	166.437	185.979	133.446	114.718	118.737	95.4178	139.966	130.85	90.1537
'ycfJ'	13.1713	9.19267	12.2594	10.2941	10.9422	12.2452	12.2988	9.72357	11.9939	13.0136	15.1202	12.4505	6.17262	4.79805	5.52976	5.24043	6.24596	4.6138
'ycfQ'	39.6342	41.4983	43.5612	39.875	38.2664	41.3902	35.9769	39.1057	37.0438	27.0809	32.2363	27.391	37.6763	37.2304	26.1781	39.9997	38.473	21.9156
'bhsA'	13.6524	12.8697	9.33453	7.80935	9.00386	8.73635	6.72412	5.17886	7.93349	2.63433	2.41924	4.0181	4.19272	3.70482	3.70612	4.51075	3.41166	2.16849
'ldtC'	29.2295	29.6792	29.8083	29.8175	31.3259	35.3034	31.839	24.8902	26.674	12.9609	15.2412	14.1482	9.08424	8.74581	9.17705	15.5223	11.8621	16.0099
'mfd'	435.856	427.328	420.303	453.179	455.32	432.02	464.309	467.366	459.08	511.377	544.086	596.66	285.629	283.632	351.081	424.939	355.442	772.951
'ycfT'	8.9613	8.31718	7.28094	7.69102	8.12848	8.23508	7.81607	7.29268	8.68311	4.26762	4.95943	5.43293	5.35737	3.52262	5.11797	6.43445	5.40616	4.19856
'lolC'	162.266	171.421	172.627	160.447	174.575	175.3	189.999	172.488	191.341	107.059	108.14	113.299	81.6999	66.3224	79.8874	74.6264	72.1697	108.886
'lolD'	108.979	114.952	105.978	99.6283	104.982	99.0358	115.574	108.386	122.438	69.2302	69.0692	64.3462	41.9855	42.3929	53.0622	58.2417	52.697	82.9562
'lolE'	207.373	199.962	209.467	209.551	214.654	204.588	239.31	232.89	243.127	125.763	127.07	120.147	93.0552	87.8833	106.713	123.714	129.695	143.951
'nagK'	186.142	191.645	188.309	194.879	200.273	198	230.459	221.158	223.262	118.756	118.482	99.2641	117.92	115.335	99.8298	132.735	142.345	145.058
'cobB'	143.982	139.554	141.76	147.076	152.753	159.546	164.597	161.972	163.73	91.8855	96.5275	82.7955	105.517	102.399	75.4753	125.306	123.135	120.789
'ycfZ'	4.81143	6.0409	6.03633	4.37797	4.81456	6.44485	6.20688	6.23577	4.935	3.47732	4.47559	2.88624	4.94974	3.34041	2.47074	3.05139	3.35917	3.73718
'ymfA'	2.64629	2.88913	1.80468	1.41988	2.12591	1.28897	1.72413	1.53252	1.87405	2.79239	1.87491	1.6412	3.49394	2.12572	1.05889	1.7247	1.25969	1.24573
'potD'	650.025	632.543	625.352	433.774	433.061	434.598	442.585	444.325	417.539	269.439	283.414	289.699	354.402	325.478	141.127	261.756	266.162	213.066
'potC'	43.4232	43.8622	44.9925	36.207	35.5777	33.1552	34.4252	35.7764	34.67	23.4456	22.3779	27.6174	20.6725	17.1272	11.589	15.1243	12.072	15.8254
'potB'	23.2152	23.6383	26.8212	17.6302	15.194	20.0506	18.9655	21.2967	21.4267	9.00942	11.4309	13.5257	6.58025	6.07348	6.41217	7.4958	6.29844	8.25871
'potA'	129.367	135.176	132.986	93.3572	85.9743	92.3762	95.2296	90.5772	96.3263	44.0987	47.538	58.2342	38.4915	38.3844	32.355	28.9219	25.6662	36.5875
'pepT'	597.039	575.199	586.769	515.299	490.773	529.91	524.021	532.471	488.128	552.999	624.828	473.344	629.782	721.347	670.572	685.368	754.448	500.506
'roxA'	361.88	370.859	360.437	399.578	421.993	396.859	413.619	406.118	415.352	176.658	180.415	169.27	225.767	236.441	187.012	218.705	227.426	213.942
'phoQ'	189.45	171.071	163.977	159.027	164.883	164.702	171.091	164.35	164.729	143.466	133.421	138.766	113.669	121.044	136.185	189.783	187.484	159.684
'phoP'	212.605	186.567	195.341	168.019	180.64	190.123	170.459	171.061	171.413	157.27	164.448	165.874	162.817	165.806	172.834	263.547	255.244	198.947
'purB'	311.48	377.337	372.137	373.902	345.773	365.208	386.895	393.805	391.427	115.068	119.571	137.747	141.679	114.546	57.9448	84.9082	84.924	75.3896
'hflD'	81.3132	96.6544	88.6158	86.6128	75.7825	75.906	86.3216	87.3536	91.0789	35.5635	38.7078	43.6898	34.357	35.955	31.002	31.9732	27.6607	37.1873
'mnmA'	234.377	228.504	230.065	205.291	185.579	192.629	220.172	204.935	225.698	99.8412	95.4993	109.224	98.0632	91.831	79.6521	74.4273	65.9237	89.3233
'nudJ'	26.2825	28.366	28.377	24.3746	24.3229	25.1349	27.1838	27.9024	29.9848	17.5973	18.1443	15.4499	19.7407	18.4634	14.8833	14.9253	12.3345	14.3951
'rluE'	44.9869	44.7377	46.7349	44.8446	47.5204	46.1165	48.2757	43.9675	45.1022	27.239	28.9704	27.7306	34.7064	29.092	26.2958	23.5488	23.9341	23.2536
'icd'	1288.92	915.678	993.132	826.726	778.458	842.485	733.791	757.91	809.403	1222.22	1125.97	1364.46	1647.86	1634.56	1760.76	2503.13	2209.23	3030.12
'ymfD'	3.84915	2.97667	4.97842	2.0115	3.06381	3.50886	4.31033	4.38618	4.18538	8.32449	10.1003	13.5823	17.7026	15.2444	11.9419	11.1442	9.23772	13.6107
'ymfE'	5.35272	4.55256	6.28525	4.73294	4.4394	5.15588	4.3678	3.4878	4.56019	14.5942	14.0316	14.1482	31.4454	32.4931	23.4721	21.9567	18.3705	11.3038
'lit'	25.3803	22.5877	27.1946	18.5768	19.5084	25.4213	20.3448	20.3455	20.1148	8.95673	10.8866	11.1488	21.0219	18.4634	16.2951	11.4759	10.3924	9.78127
'intE'	15.0959	14.7958	15.8065	14.4355	13.2557	14.8948	14.885	15.4837	16.0544	3.53	5.32232	5.20655	6.46378	5.70907	5.41211	6.23545	5.61611	5.53657
'xisE'	3.96943	4.20236	5.10288	3.66803	3.87666	4.79783	4.48274	5.02032	4.7476	1.00105	0.907214	1.30164	1.16465	1.63984	1.11772	1.59203	0.997253	1.47642
'ymfI'	70.1267	71.0024	77.4766	70.0475	80.8471	83.2818	75.4595	71.1301	77.1485	17.2812	17.7209	16.1856	28.8832	29.092	25.7075	34.8256	32.9094	24.7761
'ymfJ'	13.3517	14.183	13.504	15.737	15.194	14.3935	14.3103	14.7439	18.8655	3.10851	2.11683	2.71646	2.73692	2.00425	4.00025	5.10776	3.04425	3.2758
'cohE'	78.3662	79.2321	81.9572	73.5972	68.2167	66.9548	65.9768	65.3171	70.6518	40.1472	42.5786	48.4436	67.433	60.1882	50.7091	52.935	49.7052	40.6938
'croE'	7.09687	5.5156	7.4054	9.1109	9.00386	8.44991	6.78159	5.49593	5.99697	0.421493	0.604809	0.679116	2.15459	1.45764	1.9413	2.85238	2.57186	1.38414
'ymfL'	10.2844	8.84247	10.1435	9.93917	7.37816	6.80289	7.98848	10.7276	8.18336	2.84508	2.78212	4.30107	2.38752	2.30792	3.47081	2.98505	2.36192	2.95284
'ymfM'	1.80429	2.27628	1.61799	2.36647	1.68822	2.50633	2.1839	2.3252	1.87405	0.368806	0.66529	0.396151	0.640555	0.850287	0.588272	0.265338	0.629844	0.369104
'ymfR'	0.601429	0.262648	0.248921	0.118323	0.250107	0.429657	0.344826	0.422764	0.437279	0.15806	0.120962	0.056593	0	0.0607348	0.176482	0.199004	0.157461	0.046138
'ymfQ'	0.842001	0.963042	0.995684	0.828264	1.06296	0.644485	1.09195	1.05691	0.937026	0.579553	0.846733	0.452744	0.465858	0.182204	0.294136	0.597011	0.629844	0.276828
'stfP'	0.902144	0.875493	0.871223	1.06491	0.875375	0.930922	1.09195	0.898374	1.24937	0.15806	0.604809	0.169779	0.291161	0.546613	0.352963	0.265338	0.209948	0.276828
'tfaP'	0.661572	1.13814	0.684533	0.828264	0.375161	0.787704	1.20689	1.00406	1.06196	0.105373	0.120962	0.226372	0.465858	0.364409	0.411791	0.331673	0.262435	0.0922761
'tfaE'	3.48829	4.37746	3.23597	1.89317	2.25096	2.07667	1.7816	2.37805	1.93652	1.42254	0.907214	1.6412	0.640555	1.51837	0.588272	1.19402	0.997253	0.922761
'pinE'	1.20286	0.787943	1.36907	1.5382	0.875375	0.787704	0.804595	0.686992	1.1869	0.421493	0.725771	0.679116	0.524091	0.425144	0.764754	0.265338	0.314922	0.553657
'mcrA'	14.314	13.1324	14.4996	12.5423	12.7555	17.6159	16.2643	15.8008	15.2423	14.7523	12.2776	16.9779	9.84126	10.1427	12.0596	9.75118	8.81782	9.8274
'iraM'	1.08257	1.05059	0.808993	0.236647	0.437687	0.787704	0.574711	0.845528	0.749621	1.31717	2.23779	2.4335	1.10641	0.911022	0.588272	2.91872	2.8343	2.58373
'ycgX'	2.28543	2.45138	2.61367	3.31306	2.75118	2.43472	2.47126	1.32114	2.18639	2.89777	2.05635	3.73514	2.79515	1.3969	1.70599	1.32669	0.944766	1.61483
'bluR'	108.077	97.7925	103.551	101.995	105.045	100.325	104.712	100.037	113.318	40.516	41.4899	43.0673	60.2704	55.2687	46.1206	54.925	52.697	44.4771
'bluF'	14.1937	13.9203	15.8687	12.6606	15.8818	16.8998	15.3448	15.061	19.3652	3.53	3.26597	4.24447	4.71682	4.61585	3.47081	5.50577	3.83155	8.90464
'ycgZ'	1.20286	1.75099	1.80468	1.5382	1.06296	1.64702	0.919537	0.686992	1.3743	1.26448	0.483847	1.13186	0.465858	0.607348	0.411791	0.663345	0.682331	0.507519
'ymgA'	0.902144	0.437746	0.933453	0.591617	0.687795	0.572875	0.689653	0.951219	0.687152	0.7903	0.786252	1.01867	0.174697	0.485878	0.235309	0.530676	0.629844	0.876623
'ariR'	0.721715	0.437746	0.497842	0.473294	0.562741	0.501266	0.344826	0.422764	0.249874	0.684926	0.423366	0.962081	0.232929	0.242939	0.411791	1.52569	0.52487	1.10731
'ymgC'	1.20286	0.700394	0.311151	0.591617	0.500214	0.644485	0.344826	0.581301	0.562216	0.368806	0.604809	1.24505	0.349394	0.303674	0.0588272	0.265338	0.209948	0.692071
'ycgG'	9.74315	9.19267	8.58777	8.28264	11.0047	11.2427	10.5747	8.8252	9.99494	1.68597	1.87491	1.24505	2.67869	2.06498	2.64723	2.98505	4.30394	1.75325
'ymgF'	7.93887	5.07786	7.71655	6.62611	5.81499	6.51646	7.24136	6.81707	5.62216	5.1106	5.62472	5.48952	8.50191	9.35316	8.29464	11.4759	10.6024	4.38311
'ymgD'	31.7555	33.2687	34.2266	39.1651	38.3289	32.0094	30.862	29.435	33.1082	6.11165	7.923	6.33841	4.60035	4.98025	4.88266	8.62349	10.7074	7.05912
'ymgG'	12.209	16.1091	17.5489	21.6532	18.0077	17.9024	15.2298	15.6951	14.2428	2.58165	3.56837	2.60328	2.32929	1.82204	1.70599	3.8474	4.30394	2.86056
'ymgI'	0.842001	0.525296	0.871223	0.828264	1.00043	0.716094	0.747124	0.528455	0.749621	0.210747	0	0.226372	0.0582323	0.0607348	0.117654	0	0.157461	0.046138
'ymgJ'	2.105	1.83853	1.36907	1.65653	1.93833	1.93345	1.37931	1.79675	1.43677	0.368806	0.302405	0.452744	0.524091	0.425144	0.352963	0.331673	0.262435	0.23069
'minE'	119.324	131.411	131.368	121.518	108.859	117.368	113.39	128.098	120.939	100.473	111.587	123.542	134.633	126.875	112.713	139.303	126.914	156.039
'minD'	486.677	501.307	497.033	455.309	407.737	440.183	442.757	481.158	456.332	486.403	493.887	539.897	498.468	505.01	431.792	508.587	503.823	613.728
'minC'	361.098	358.514	365.354	339.47	340.146	352.104	357.183	361.833	359.068	263.486	269.745	278.947	343.978	325.478	290.254	301.026	298.284	323.612
'ycgJ'	54.1888	48.5898	54.6381	46.3828	44.269	53.4206	45.9769	45.1301	47.8508	24.3939	25.3415	25.2405	36.5699	36.0157	33.2962	50.3479	43.2493	27.5444
'pliG'	62.0074	63.123	60.6745	55.967	46.9576	49.6253	44.5401	49.7276	46.1641	23.8144	24.4343	28.0135	32.843	32.7968	25.6487	45.4392	39.3128	18.6398
'ycgL'	70.3071	67.4129	74.3029	63.7763	65.7782	66.5968	58.2182	69.0162	61.1566	50.8953	52.316	56.31	54.6801	44.4579	50.1208	53.9963	42.8294	46.5533
'ycgM'	140.674	134.563	132.924	129.091	127.492	125.102	127.413	129.102	125.561	90.4103	89.1489	93.3218	66.9671	70.999	70.3574	79.9994	88.8605	90.7535
'ycgN'	37.6495	41.1481	38.645	35.497	36.7657	37.8814	35.6321	36.1992	32.7959	20.8639	19.3539	21.7883	15.4316	15.0622	15.0009	20.829	20.155	17.5786
'hlyE'	18.6443	16.3717	14.873	13.7255	15.7567	21.6977	15.977	15.1667	15.6171	1.89672	3.08453	1.69779	5.47383	4.55511	7.23575	15.9203	15.0113	4.38311
'umuD'	5.77372	5.8658	6.65863	6.50779	5.06467	6.58807	6.83906	6.65853	4.87253	2.73971	2.41924	2.94283	3.66863	3.15821	2.76488	3.78107	3.51663	3.13739
'umuC'	10.0439	8.14208	8.0277	7.92767	9.31649	9.45244	8.50572	8.71951	7.05893	5.74284	4.95943	4.24447	4.94974	4.43364	4.94149	6.10278	4.93378	5.35201
'dsbB'	124.135	118.629	116.557	116.43	116.8	109.276	120.919	113.459	117.253	86.0373	89.0279	97.9058	59.5716	50.2884	62.5922	68.8552	70.9625	85.9552
'nhaB'	193.901	200.663	198.266	154.175	142.061	145.94	172.356	166.463	166.541	187.354	197.168	217.657	156.179	157.789	150.715	118.805	108.491	201.762
'fadR'	131.713	138.503	148.419	144.828	152.315	160.333	173.16	161.654	172.475	124.077	127.978	120.034	159.556	149.833	128.185	138.175	146.229	163.744
'ycgB'	243.038	235.683	246.867	259.247	292.875	278.632	264.022	245.467	246.813	22.2864	23.1037	16.412	55.6118	60.3097	60.0626	259.7	247.844	84.8479
'dadA'	81.193	56.5568	50.9666	56.4403	48.3332	53.4922	58.4481	49.7805	60.1571	169.493	164.085	574.985	145.988	129.972	126.42	112.901	108.176	619.173
'dadX'	53.5874	38.5217	35.409	36.5619	32.9516	34.5157	38.6206	34.0325	39.8548	132.033	127.615	427.956	77.7983	69.6628	80.5345	68.7226	61.9872	519.561
'cvrA'	101.521	106.985	107.347	122.938	127.179	132.907	135.747	132.695	143.115	82.2965	85.3386	83.418	86.3585	95.5358	74.0635	91.011	86.3936	94.6753
'ldcA'	90.455	91.7516	81.3349	86.1395	85.2865	88.366	79.425	84.0244	81.8336	42.7816	43.0019	42.4447	47.2264	46.4621	38.5318	43.2501	42.8294	45.8612
'emtA'	68.8637	70.3021	66.8975	76.6736	71.7182	64.3769	64.9423	71.1829	70.9016	34.1936	31.0872	33.1069	25.9134	25.0835	23.825	28.9882	29.3402	32.6657
'ycgR'	4.51072	4.46501	2.6759	6.0345	3.62655	2.86438	4.65516	3.4878	4.68513	1.89672	1.51202	2.03735	1.33934	1.70057	2.00013	1.7247	1.67958	2.12235
'ymgE'	26.8839	26.7901	27.3191	31.3557	32.8266	30.8637	30.4597	26.6341	26.7989	1.79135	2.05635	1.6412	4.36742	5.46613	4.70618	16.3183	19.3677	5.39815
'ycgY'	3.54843	4.37746	5.28957	4.49629	4.50193	4.36817	3.90803	4.12195	5.18488	0.63224	0.846733	1.24505	1.68874	1.27543	0.941236	3.18406	2.4144	1.79938
'treA'	130.811	118.016	132.986	109.213	132.744	131.976	128.965	128.52	120.439	28.0293	23.769	18.5059	40.0638	45.7333	66.9454	115.289	105.289	53.6586
'dhaM'	248.45	214.496	247.178	264.098	270.678	324.606	332.7	305.764	300.848	539.511	569.428	472.325	392.078	430.731	572.389	574.988	580.874	764.923
'dhaL'	120.286	109.787	112.574	122.701	126.304	126.677	153.103	139.724	130.184	289.25	319.218	283.191	236.365	249.681	301.019	303.414	341.795	421.471
'dhaK'	275.214	247.064	254.895	271.079	276.806	304.698	321.608	303.545	288.104	654.684	732.666	642.783	588.146	658.001	736.87	832.299	857.218	1049.27
'dhaR'	74.0961	67.6756	68.7644	54.1921	54.3358	50.2698	56.3791	57.5488	49.0377	73.8667	70.8231	77.0796	62.0756	56.3619	66.5336	63.9465	57.6307	67.3154
'ycgV'	76.0207	82.2963	78.659	81.4065	80.597	80.4174	86.2641	89.2561	83.9575	25.5003	24.9181	20.0905	27.835	29.7601	28.8842	32.6366	30.1276	26.8985
'ychF'	243.519	244.262	243.631	232.387	213.529	226.429	227.126	238.175	233.757	160.852	151.565	191.114	164.39	144.913	116.36	123.515	108.543	148.703
'pth'	55.2112	59.9712	58.8076	56.2036	58.1499	58.5049	54.0228	53.691	58.7203	31.8754	27.7607	35.3706	31.0378	23.5044	23.5897	25.4061	24.249	31.3739
'ychH'	93.2817	89.5629	89.736	89.0975	94.9782	91.5168	102.528	96.3374	90.2044	262.274	266.902	195.076	525.197	656.057	392.319	692.068	796.228	354.202
'dauA'	62.1276	68.1133	59.3054	62.8297	62.7144	58.5765	61.2642	64.3658	67.9031	45.732	48.9291	52.6315	64.6378	56.119	40.7084	54.9913	52.0146	62.0095
'prs'	723.339	759.928	749.625	836.665	759.388	781.259	809.882	786.817	814.463	329.186	326.657	350.65	450.077	369.632	257.663	331.142	320.433	336.946
'ispE'	367.654	361.754	361.62	386.799	380.413	362.057	396.723	396.236	391.552	184.456	184.89	171.194	210.743	200.121	165.481	186.4	201.025	181.784
'lolB'	115.835	113.289	121.66	128.618	134.057	136.201	134.08	126.618	132.433	59.9047	60.2995	56.2534	75.469	70.756	65.5335	59.5684	54.8489	52.0899
'hemA'	289.648	293.728	278.916	289.064	295.814	289.159	309.597	295.618	321.462	150.473	151.202	168.873	209.403	188.642	156.539	194.228	181.605	186.213
'prfA'	186.924	184.291	184.264	184.585	186.955	165.991	203.792	194.471	211.268	86.9856	86.4877	94.963	72.4992	71.2419	54.3564	76.6827	79.3079	109.255
'prmC'	56.4141	56.8195	61.0479	65.6695	63.3396	58.8629	72.0113	66.374	70.4643	30.1368	30.7243	32.8239	19.566	21.3787	17.354	30.0495	26.5584	38.2946
'ychQ'	12.9909	16.5468	12.8194	15.0271	13.5058	15.3244	15.0574	16.5406	15.6796	4.21493	4.89895	7.52687	4.94974	5.16246	3.94143	4.37808	5.09124	7.1514
'ychA'	124.315	128.873	126.452	123.53	123.866	117.869	130.804	126.935	134.932	57.5865	64.775	67.7418	76.5755	66.5046	56.5918	67.3296	69.5978	78.5731
'kdsA'	377.637	394.672	388.005	400.525	388.354	387.908	420.458	415.789	415.79	230.715	239.867	241.312	311.31	307.136	175.835	285.57	282.538	269.077
'ldrA'	24.7789	22.5877	24.9543	22.1265	23.4475	23.4879	27.2988	25.2073	25.4871	14.5942	13.9106	13.7521	16.6544	15.3052	10.5301	15.9203	15.4312	14.3951
'ldrB'	4.21001	3.23932	3.79604	3.07641	3.43897	3.07921	3.33332	3.22358	2.87355	1.52791	1.69347	1.47142	1.51404	0.971757	1.35303	2.05637	1.67958	1.61483
'ldrC'	24.7789	22.5877	24.9543	22.1265	23.4475	23.4879	27.2988	25.2073	25.4871	14.5942	13.9106	13.7521	16.6544	15.3052	10.5301	15.9203	15.4312	14.3951
'chaA'	50.8208	52.9673	48.9752	39.7567	39.5169	42.9657	42.9309	38.313	45.9143	63.1713	59.5132	82.2862	53.4572	47.6768	46.1794	50.4806	43.2493	59.0106
'chaB'	68.7434	69.8643	73.1205	64.7229	78.221	69.1747	66.609	65.7927	68.6528	5.00523	5.44328	4.30107	9.49186	8.07773	10.7654	30.1822	23.3042	10.704
'chaC'	125.338	107.16	125.581	109.686	120.677	120.375	125.115	124.398	126.249	21.5488	22.8013	18.8455	20.6725	22.9578	24.3545	39.5354	40.1526	28.3288
'ychN'	108.919	110.575	111.019	120.69	125.304	119.445	130.977	124.768	122.313	160.8	171.04	141.256	169.281	189.736	198.718	225.338	221.495	200.701
'ychO'	46.2499	46.226	53.3935	46.9744	49.2086	47.0474	48.8504	47.4553	51.349	29.083	25.9463	27.674	25.3893	29.5171	25.0016	26.7328	26.296	24.2225
'narL'	132.134	127.122	126.825	109.804	94.6656	96.6727	103.103	103.472	92.3283	162.433	131.485	145.444	263.618	265.35	177.423	230.314	248.526	166.651
'narX'	103.807	107.686	102.618	89.9258	84.7863	81.5631	84.0227	80.8008	79.7097	197.786	121.022	183.814	251.913	245.004	199.189	265.404	264.745	235.996
'narK'	116.798	114.164	121.598	130.392	113.361	135.342	110.632	123.024	96.2013	2692.66	740.589	1968.64	4291.84	4610.74	3461.69	3846.94	4130.1	2642.1
'narG'	500.63	443.174	454.405	433.419	446.379	440.183	364.769	396.817	315.84	5673.35	1439.26	4434.06	13127.1	14273.5	10261.6	12587.9	13621.4	7669.53
'narH'	163.709	118.367	135.724	171.806	162.507	175.013	152.068	158.061	141.928	934.45	501.024	704.13	1831.11	1980.56	1224.19	1164.64	1338.94	688.149
'narJ'	47.3926	37.0333	37.2759	57.2685	50.7092	49.6253	48.1033	47.878	48.1007	274.339	174.608	221.731	533.641	546.795	209.66	192.702	221.338	134.908
'narI'	79.088	48.7649	53.2068	82.5898	81.2223	74.1874	72.4136	75.1463	66.5288	359.007	259.584	306.338	669.205	716.306	211.837	227.992	259.076	160.468
'tpr'	11.6076	14.0954	13.6284	11.359	12.3178	11.0279	13.2758	10.5163	12.7436	4.89986	5.56424	6.33841	7.2208	5.76981	4.17673	5.90377	4.93378	7.24367
'purU'	245.744	226.753	253.588	245.284	259.549	276.269	280.919	288.008	308.719	84.5621	77.9599	80.8714	88.6295	73.5498	78.5344	76.7491	74.9515	77.6042
'ychJ'	106.694	110.75	111.641	110.869	117.238	117.296	119.655	123.5	128.622	45.9427	51.5902	46.859	64.6378	59.8238	51.7091	56.0527	46.0836	55.4118
'rssA'	217.778	199.962	206.044	206.711	248.481	226.572	241.379	231.569	243.752	82.0331	88.9069	76.7967	109.535	118.008	122.478	174.659	194.989	175.694
'rssB'	217.597	218.348	226.705	215.94	236.914	228.219	232.068	212.809	229.134	42.6762	49.2315	41.8788	57.9411	65.5329	75.4753	124.51	124.919	90.0615
'galU'	647.258	637.534	653.168	639.893	638.899	667.113	672.412	652.219	640.988	385.297	406.674	426.768	360.749	352.505	337.257	454.723	463.303	370.073
'hns'	3031.26	3057.4	3086.37	2651.04	2594.3	2659.14	2561.66	2688.2	2596.37	1678.6	1863.48	1987.83	2314.68	2303.61	1884.24	2206.68	2053.87	2016.33
'tdk'	48.8962	48.0645	49.0374	40.9399	37.2034	43.4669	39.4252	39.5284	41.1667	27.5551	25.8858	33.9558	31.9695	23.4436	20.7072	22.2221	19.3677	27.0369
'adhE'	18124.1	17418.7	19403.8	21775.5	24207.1	25934.4	24738.6	23582.4	23287.9	4262.03	8321.63	5184.94	3251.98	3513.33	2826.06	4108.43	4133.3	1836.85
'ychE'	38.8523	35.545	39.0184	42.3598	38.7666	42.7508	43.793	37.4675	39.7299	14.2254	14.9993	18.2229	24.3993	21.5001	15.8834	21.6914	22.8843	15.5485
'oppA'	8251.43	7218.26	8001.31	9415.71	10043.2	10745.9	9778.65	9388.43	10034.6	1029.55	1036.82	1167.74	1233.24	1351.71	1457.39	2077.46	1797.52	2298.64
'oppB'	907.196	709.762	939.428	1007.52	1158.81	1207.76	1254.94	1192.3	1315.27	166.648	157.19	170.458	103.653	108.412	185.129	237.212	211.103	337.5
'oppC'	1038.79	989.919	1070.92	1257.19	1335.57	1301.93	1540.34	1482.16	1560.71	268.175	268.535	276.343	194.146	190.161	197.66	285.172	268.156	466.456
'oppD'	1234.67	1212.56	1319.16	1587.78	1666.59	1617.73	1886.49	1829.19	1948.89	410.113	399.9	391.623	379.5	353.719	295.901	458.902	439.054	545.259
'oppF'	1290.07	1244.43	1329.74	1776.63	1740.56	1773.34	2016.95	1993.54	2106.68	446.993	430.201	360.61	457.997	437.473	315.726	566.099	559.669	548.397
'yciU'	85.2225	86.7613	90.0471	111.461	105.733	114.145	117.126	106.061	121.563	44.1514	43.8487	44.5387	43.4995	43.7291	42.8851	47.0975	49.7052	48.9986
'clsA'	291.513	280.333	280.223	256.999	258.111	251.063	263.447	261.268	247.375	176.395	181.443	190.945	190.653	186.881	180.776	194.161	194.097	205.914
'yciY'	52.3845	64.6113	52.3356	59.7533	54.7735	49.2673	58.7929	54.5894	60.0946	20.9693	24.3133	26.3723	32.6683	32.8575	27.0605	28.5238	32.0171	32.435
'kch'	162.266	164.943	176.858	178.55	175.95	189.335	175.229	176.504	169.164	32.1388	33.7483	32.3146	47.4593	43.9113	32.2962	44.9085	40.9399	30.1743
'yciI'	251.518	269.652	250.477	301.843	269.615	297.179	307.815	305.817	281.67	96.4165	103.12	98.302	104.469	112.42	106.066	126.367	127.071	138.368
'tonB'	616.224	642.436	625.538	603.923	575.747	576.241	579.079	590.76	595.261	32.1388	34.4741	44.7084	28.1262	27.1485	32.8256	76.6164	76.5261	31.2816
'yciA'	24.5985	26.615	25.0788	33.4855	25.8861	27.2116	29.3102	28.1138	32.3586	13.9093	13.9106	15.7894	15.0822	11.7218	10.4712	10.6799	8.76533	10.7502
'yciB'	58.2184	62.3351	63.9727	59.635	62.9019	60.3667	67.586	64.5244	65.7792	35.5108	33.5669	38.9926	32.843	28.4846	28.4724	35.6216	32.9094	38.9405
'yciC'	95.7475	96.4793	100.689	96.5519	97.9169	98.463	101.494	95.8618	100.699	60.3262	57.2754	64.1764	55.4954	47.5554	51.768	46.1688	43.9316	60.5793
'ompW'	50.8809	43.3369	58.4964	31.0007	28.3872	38.2394	45.9194	41.5366	37.0438	220.652	329.016	93.3218	67.3748	63.8323	74.0047	63.8802	51.1748	71.191
'yciE'	16.84	13.1324	17.4867	12.424	21.3216	16.7566	10.6896	9.35366	11.6816	11.3803	18.1443	6.22523	2.44576	2.49013	2.94136	3.25039	3.2542	2.95284
'yciF'	12.8104	9.28022	10.3302	10.4125	14.8188	12.2452	7.41377	6.71138	6.99646	0.7903	1.14914	0.905488	0.931717	0.668083	0.705927	1.7247	1.52212	1.01504
'yciG'	19.1856	15.5838	16.491	21.2982	26.949	22.8434	18.6781	16.435	16.3043	0.368806	0.181443	0.282965	0.349394	0.607348	1.00006	3.4494	2.09948	0.553657
'trpA'	1365.91	593.234	920.883	1213.88	3207.56	2125.3	544.136	420.703	689.589	40.0945	39.1916	49.4623	25.2146	21.3787	31.002	46.9649	39.0503	89.6924
'trpB'	1725.44	726.396	1180.45	1630.73	4566.77	2953.67	732.641	581.142	979.067	52.4759	52.316	59.7056	28.3009	27.6951	38.2377	48.6895	46.661	112.485
'trpC'	670.173	361.141	577.185	1071.77	3299.48	2296.44	445.228	356.02	712.327	15.7006	16.2089	22.241	14.2087	14.9408	16.2363	18.64	16.7958	36.8182
'trpD'	623.201	461.822	713.781	1751.66	5227.8	3240.4	631.435	531.732	1125.31	8.37718	8.10444	9.56421	7.51196	9.5961	11.3537	11.5422	9.18523	12.4111
'trpE'	620.434	489.225	832.827	2405.63	6973.05	4297.71	805.457	715.475	1705.2	4.68911	6.10857	4.64062	4.30919	6.07348	11.3537	8.75616	6.98077	8.95078
'trpL'	11.7279	14.0954	18.8558	75.8453	162.945	130.258	20.1723	18.6016	46.2891	0.105373	0.241924	0.679116	0.116465	0.242939	0.352963	0.928683	0.367409	0.692071
'yciV'	101.341	104.271	102.867	103.651	101.794	92.6626	107.298	103.947	93.0154	39.8838	37.8006	43.0673	56.9512	54.4184	48.0619	66.5999	73.2194	58.3185
'yciO'	94.8454	90.6135	96.3324	87.3227	91.9769	91.7317	94.9997	92.8496	94.2648	45.5213	44.0906	44.4255	54.7383	49.8633	47.6501	70.5136	76.5261	56.15
'yciQ'	38.4915	40.3602	41.0097	40.4666	41.3927	38.3826	43.5631	38.2073	44.2901	12.0652	11.7938	14.2048	15.3733	15.0015	14.2362	19.1707	19.7351	18.1323
'rluB'	115.174	104.884	104.298	74.0705	76.0326	71.8242	76.2066	73.2967	76.8986	106.954	102.576	99.6036	103.77	93.9567	68.2396	56.4507	58.523	62.1941
'btuR'	30.9135	38.5217	32.2975	34.4321	34.1396	33.0836	33.2758	34.3496	37.0438	31.5593	33.2645	41.4261	19.8572	21.3787	19.4718	19.7677	20.8373	37.1873
'yciK'	70.1267	69.6892	69.3867	69.5742	68.2167	68.0289	68.6779	63.3089	64.2175	66.069	65.8032	76.7967	48.4493	46.2192	47.2971	46.0362	44.8239	83.1408
'sohB'	303.06	272.191	308.351	297.583	317.448	320.667	331.033	338.053	335.893	120.178	129.187	106.395	143.717	143.881	125.126	170.679	165.859	150.41
'yciN'	168.581	178.863	172.129	156.187	137.997	148.804	150.114	160.175	147.051	109.43	127.433	118.789	140.34	133.981	105.713	165.637	166.226	137.953
'topA'	912.549	917.254	904.703	775.019	767.079	742.088	788.618	753.841	806.779	853.682	920.036	1299.2	288.133	267.658	379.847	489.217	389.769	1354.98
'cysB'	232.633	214.846	211.832	180.088	166.071	169.571	170.976	178.618	194.089	114.646	121.385	145.331	148.143	144.549	126.655	128.291	121.455	144.32
'ymiA'	8.29972	7.52924	7.65432	9.46587	7.69079	9.0944	7.29883	7.39837	7.18387	7.4815	8.64877	7.47027	15.3733	13.2402	10.3536	14.3946	16.5859	11.027
'yciX'	11.9684	11.2063	12.6327	11.5957	12.5679	12.1736	11.1494	9.30081	13.1184	11.2749	11.3704	10.4697	27.6603	24.1725	15.3539	25.6051	20.155	14.7642
'acnA'	113.61	88.3372	92.7853	87.086	94.1653	97.8185	103.103	96.0731	99.3872	188.618	155.254	180.815	153.267	155.542	200.189	360.329	310.566	333.993
'ribA'	134.179	137.19	131.99	143.053	135.308	131.117	139.77	134.492	143.677	105.9	107.596	99.9998	157.635	138.05	108.477	120.265	123.607	112.069
'pgpB'	74.2164	70.2145	78.2856	80.3416	88.8506	86.2894	84.9422	78.2642	80.5842	33.8775	36.4095	36.1629	42.859	41.4819	40.7673	60.6298	60.2551	46.6917
'yciS'	85.6435	85.6232	90.545	87.3227	87.0998	82.8521	80.1721	83.2845	83.2704	60.3262	62.2349	85.0026	56.7765	57.03	55.5917	58.9051	58.4181	104.503
'yciM'	142.118	143.843	142.196	141.278	143.812	140.354	154.999	140.305	151.673	83.0868	93.2616	126.938	79.6035	70.4524	76.5342	76.9481	79.2554	143.858
'pyrF'	53.8881	49.2027	52.0245	68.036	59.5255	65.2362	60.0573	68.8577	64.4674	27.9239	30.7243	35.7102	31.1543	25.873	21.0013	22.4874	21.0998	37.7409
'yciH'	10.4047	6.12845	8.27662	10.8858	10.0043	10.5982	11.7816	11.7845	11.8065	4.42568	3.62885	4.69722	4.19272	4.43364	2.70605	5.30676	2.99176	7.28981
'osmB'	230.648	207.579	210.525	209.314	233.287	247.124	200.574	182.37	193.465	20.7585	19.6563	18.1098	19.042	19.9818	23.1191	47.1639	39.9951	12.5957
'yciT'	137.908	137.54	135.537	123.056	122.803	120.017	133.735	123.077	130.809	93.6242	95.4993	103.056	64.1137	58.6091	59.0037	51.8073	55.2688	62.9784
'yciZ'	64.2327	68.9013	72.1248	62.3565	64.6527	65.5942	67.9308	60.2967	67.6533	25.9745	27.3979	32.0882	29.9314	21.8645	26.7076	24.1458	21.8346	23.6688
'gmr'	164.13	158.114	161.176	134.415	131.869	133.838	122.758	126.565	112.006	32.8765	32.0549	34.4085	46.7023	50.3492	56.4153	84.1122	82.2472	40.0017
'ymiB'	1.32314	0.700394	1.2446	0.236647	1.25054	1.21736	0.574711	0.898374	0.999494	0.15806	0.302405	0.226372	0.232929	0.364409	0.470618	0.995018	0.314922	0.276828
'rnb'	464.424	480.12	466.291	473.412	430.559	408.46	425.746	457.008	484.755	224.076	226.864	288.398	201.6	178.985	137.773	123.183	95.6314	193.134
'yciW'	145.786	118.191	113.819	97.3802	76.5328	78.1975	60.632	78.0528	90.954	8.21912	8.34636	9.6774	9.31717	7.77405	8.94174	8.29182	7.2957	6.64388
'fabI'	809.103	855.269	849.38	837.73	794.465	820.358	824.595	807.479	818.586	677.708	706.659	819.07	673.806	599.999	450.087	606.762	559.354	716.847
'ycjD'	9.08158	9.98061	9.77015	9.82085	10.3169	8.95118	11.839	9.88211	12.1813	4.53105	4.89895	5.6027	5.5903	6.25568	6.41217	5.90377	7.50564	8.39712
'sapF'	51.7831	54.7183	50.3443	54.9021	56.024	50.055	52.9309	52.8984	48.9752	36.3538	36.8934	31.6921	40.355	36.1979	27.3547	36.7493	42.6719	32.4812
'sapD'	91.2368	80.2827	91.2917	91.5823	98.2921	91.302	94.0801	91.1585	95.5766	64.1723	65.6218	61.1204	65.1037	62.5568	47.9442	69.3859	64.7165	55.9193
'sapC'	29.7106	35.0197	31.7996	35.7337	35.5152	36.5208	31.724	32.9228	33.2957	22.1284	24.4948	25.8064	22.1865	19.8603	17.354	20.033	23.4617	18.4552
'sapB'	41.9798	44.8252	42.6277	43.3064	46.2698	39.7432	42.2412	39.5284	41.0417	26.6594	28.547	30.6734	19.9737	21.3787	24.6486	26.6001	27.1883	21.6387
'sapA'	134.54	129.66	141.636	139.267	137.872	138.779	130.057	128.679	122.688	81.1374	84.5523	84.8895	81.234	87.4581	79.005	83.4488	81.8273	77.2812
'ymjA'	28.628	27.4029	30.6795	32.5389	31.1383	35.7331	31.8964	31.8658	33.8579	12.6975	10.947	14.4878	9.43363	8.07773	11.4713	8.42449	6.8758	13.9337
'puuP'	12.8706	10.5935	13.0061	11.4774	13.5683	12.6033	13.6206	13.1057	11.9939	4.3203	4.1127	6.16863	3.20278	4.0085	4.11791	5.24043	5.30119	8.62782
'puuA'	18.4037	15.6713	14.7486	11.1224	13.1306	11.7439	15.2298	12.0488	12.8685	4.95254	6.53194	9.33784	3.31924	5.52687	5.00032	4.84242	4.0415	13.0571
'puuD'	11.5474	8.22963	9.2723	10.7674	11.0672	9.81049	12.2413	11.4146	10.2448	5.79553	6.10857	4.98018	5.35737	6.68083	5.23562	8.15915	8.87031	8.99692
'puuR'	13.893	10.8561	13.504	13.3705	13.6934	15.396	14.5977	14.9024	14.9924	9.43091	8.52781	11.0922	8.90954	8.3814	6.29451	11.9402	10.9698	15.9638
'puuC'	14.5546	9.19267	11.077	9.46587	10.0043	8.59313	10.862	8.71951	8.55817	2.89777	3.20549	4.35766	3.20278	3.34041	3.82377	6.50078	5.40616	11.3961
'puuB'	6.85629	5.25296	4.91619	4.14132	5.00214	4.94105	4.25286	4.70325	5.30981	1.05373	2.11683	2.60328	1.8052	1.94351	1.35303	3.4494	2.88679	6.92071
'puuE'	9.56273	11.0312	7.90324	6.74444	9.06638	7.87704	9.88502	8.13821	8.55817	5.79553	5.26184	6.39501	6.58025	6.25568	6.29451	6.10278	6.82331	11.027
'pspF'	32.417	29.6792	29.6216	26.6228	24.1353	27.6412	26.2643	29.1707	27.0488	30.4529	34.2927	32.541	42.5096	40.3886	35.2963	33.0346	34.6939	35.6647
'pspA'	64.4732	61.0218	60.2389	54.4288	50.084	53.4206	46.609	47.4024	46.0392	53.0554	53.4651	47.7645	73.6056	76.7081	55.0035	278.207	263.852	126.326
'pspB'	6.07444	4.46501	4.97842	5.5612	5.06467	4.583	4.99998	4.65041	4.49772	4.10956	4.89895	3.45217	4.77505	4.98025	3.35315	12.6036	11.6521	6.73616
'pspC'	13.2314	10.5059	14.064	12.424	10.7546	10.8846	12.4138	10.7805	11.9315	10.1158	11.068	8.8285	11.7047	8.98875	8.23581	27.6615	31.5972	22.8845
'pspD'	4.51072	4.11481	4.23166	4.85126	4.81456	5.51393	4.94251	3.91057	4.12291	3.58269	2.47972	2.26372	3.31924	3.09747	2.47074	10.2819	10.0775	7.24367
'pspE'	45.2876	44.3875	50.282	50.5241	46.7075	50.9143	49.8849	45.5528	42.541	142.359	162.875	130.673	335.302	355.056	286.606	304.011	274.56	233.781
'ycjM'	3.84915	2.88913	2.73813	2.72144	3.62655	2.86438	2.75861	3.06504	2.99848	23.3929	22.9223	29.1454	12.4035	12.9365	18.0011	11.0115	11.6521	14.2105
'ycjN'	1.02243	1.31324	1.68022	1.89317	1.25054	1.71863	1.83907	2.06098	1.93652	14.2781	16.8137	18.8455	7.10434	5.64834	10.9419	7.36313	6.14098	17.0711
'ycjO'	1.62386	2.36383	1.36907	0.709941	2.43854	1.71863	1.60919	1.47967	0.937026	5.05792	5.98761	7.30049	2.91161	2.73307	3.82377	2.32171	2.72933	5.2136
'ycjP'	1.86443	1.83853	1.74245	2.60312	2.50107	2.07667	1.72413	2.48374	1.68665	4.16224	4.47559	7.80983	2.56222	2.67233	4.00025	2.32171	2.51938	7.61278
'ycjQ'	6.07444	6.47864	5.60072	6.27114	5.75246	6.37324	6.26435	5.76016	5.55969	14.8049	16.5113	17.4872	8.61838	8.3814	12.4714	8.42449	9.34269	17.6247
'ycjR'	4.93172	4.99031	5.60072	5.91617	4.18929	5.15588	4.25286	3.91057	4.7476	9.37822	11.3704	10.3565	6.05616	5.70907	6.94161	5.7711	6.19347	10.5656
'ycjS'	6.55558	7.87943	5.72518	6.86276	6.12762	6.15841	7.01147	7.18699	6.62165	11.9072	11.068	13.2428	7.16257	5.4054	7.88285	6.56712	6.50839	12.7802
'ycjT'	11.8482	8.75493	9.2723	12.5423	11.1298	13.0329	11.7241	10.1463	11.869	15.6479	14.3945	13.1862	6.98787	7.53112	11.4713	9.28683	7.24321	14.9026
'ycjU'	3.12743	2.53893	3.17374	2.36647	2.50107	2.86438	3.04597	2.11382	2.24886	2.63433	2.60068	2.09394	2.27106	1.63984	1.9413	2.12271	2.4144	1.66097
'ompG'	2.105	1.05059	0.808993	0.828264	0.812848	1.07414	0.747124	1.21545	0.562216	2.42359	1.69347	0.735709	1.39757	1.3969	1.58834	1.39303	1.31218	1.338
'ycjW'	22.1927	20.9243	24.0209	22.5998	23.26	22.4137	22.931	22.6707	19.5526	17.2812	16.0274	20.2603	21.6042	14.6371	16.7658	14.6599	13.2267	18.04
'ycjX'	63.8116	58.658	65.964	61.4099	65.9658	57.8604	56.609	55.4349	58.3455	123.445	144.67	231.635	22.2447	26.1767	53.1798	58.5071	46.2411	309.771
'ycjF'	53.1062	46.0509	47.1705	47.3294	52.1473	44.3262	45.2297	42.2236	39.5425	125.658	129.127	158.46	15.3151	17.1879	46.1794	67.9929	48.7604	218.925
'tyrR'	318.397	324.195	312.458	287.171	278.182	295.675	295.689	310.15	296.288	235.615	254.141	234.691	287.959	291.891	268.311	317.875	314.817	295.468
'tpx'	806.396	773.585	750.87	650.187	608.761	677.998	656.147	618.821	624.434	849.256	828.709	891.226	974.051	938.049	988.18	1177.37	1112.62	1069.43
'ycjG'	105.31	103.308	100.377	104.598	110.36	105.839	110.344	109.707	115.879	33.6668	36.0466	31.8053	43.6742	46.7658	45.5911	53.134	53.7992	50.8903
'mpaA'	119.564	119.592	122.469	132.996	144.437	138.779	129.655	135.073	135.869	46.0481	46.3889	42.5579	55.0295	57.6373	53.2387	68.7226	61.9872	61.2252
'ycjY'	19.5465	15.7589	19.1669	16.092	17.1949	17.043	14.5977	16.3821	17.6161	5.9009	7.25771	7.30049	6.58025	8.50287	8.94174	12.5372	11.2322	7.98188
'pgrR'	42.0399	40.8855	40.5119	37.1536	33.8895	36.8789	32.4712	35.5122	35.1697	22.023	20.624	25.6366	27.2527	25.2049	24.5898	26.6665	27.6607	28.0519
'mppA'	125.578	138.153	135.102	91.109	102.794	109.849	108.333	100.671	103.76	174.551	163.903	171.929	203.929	193.38	181.306	142.155	126.546	201.023
'ynaI'	45.5282	44.0373	44.8058	52.8906	56.0865	61.0112	46.5516	51.7886	50.5369	22.9187	27.0954	24.6745	35.7546	35.1655	18.4718	27.9932	21.7296	17.5786
'ynaJ'	64.4732	56.7319	57.0029	59.1617	57.8373	66.0955	66.9538	57.4431	62.2185	75.3946	78.2018	129.598	99.0531	100.516	71.8281	77.6114	83.4019	173.156
'uspE'	722.437	653.38	681.11	771.114	724.81	763.428	706.607	741.264	669.536	401.999	450.704	355.574	622.503	700.819	579.801	973.526	977.203	665.726
'fnr'	441.209	415.596	399.829	496.012	445.316	468.755	454.826	425.301	475.322	174.34	189.003	199.037	207.307	189.978	132.479	179.899	166.751	184.691
'ogt'	37.2285	40.6229	40.6363	34.6688	36.7657	42.1063	36.724	37.1504	39.1677	29.6626	23.1037	33.786	56.4271	49.3774	50.0032	64.0792	66.1861	47.8452
'abgT'	7.03672	6.74129	6.96979	8.75593	7.69079	7.30416	7.41377	7.97967	7.62114	4.00418	4.23366	4.47084	4.65858	4.0085	3.58846	4.57708	5.51114	4.42925
'abgB'	11.2467	9.71797	9.77015	10.7674	11.2548	11.1711	8.90802	9.14227	8.68311	6.05896	6.29001	6.11204	5.88146	5.4054	5.41211	5.70477	6.24596	6.04408
'abgA'	2.70643	2.27628	2.30252	1.77485	2.5636	3.22242	2.47126	1.90244	1.74912	3.79344	3.08453	2.82965	3.02808	1.70057	2.23544	3.78107	2.78181	3.46035
'abgR'	10.946	10.3308	9.08561	11.4774	8.06596	9.23762	9.02296	11.0976	9.80754	16.8597	19.7773	19.7509	24.6323	22.4111	19.766	19.1043	18.6854	27.729
'smrA'	44.4456	38.3466	40.8853	35.7337	32.3263	33.6564	35.9194	34.8252	32.546	15.8587	15.1202	19.5812	16.2468	14.88	15.0598	14.5936	15.1687	15.6869
'ydaM'	100.98	101.032	112.823	146.484	161.944	160.763	147.356	134.175	139.429	11.9599	10.0398	12.8466	20.4395	19.3137	27.6488	38.076	31.6497	30.0359
'ydaN'	147.771	145.77	148.357	152.519	147	143.72	145.172	150.504	138.367	80.9794	75.0568	70.2319	106.449	101.67	106.242	150.513	150.848	100.489
'dbpA'	72.4722	68.7262	70.7558	82.4714	91.9144	93.2355	91.9537	84.8699	87.7681	12.1706	12.5195	12.8466	12.9276	11.8433	14.648	24.2784	20.6274	16.8865
'ttcA'	64.5334	62.5977	64.2838	70.2841	65.1529	63.6608	64.7699	62.0935	62.9681	51.7383	56.1868	67.0627	39.9473	33.2827	32.5903	40.9947	33.1193	49.6445
'intR'	15.5169	15.146	14.9975	15.1454	15.069	15.9689	14.3103	14.2154	13.743	7.21807	5.86665	7.92302	5.00798	5.10172	5.47093	8.09281	7.50564	7.93574
'ydaQ'	0.360858	0.262648	0.373381	0.236647	0.687795	0.358047	0.402298	0.369919	0.249874	0	0.120962	0.113186	0.232929	0.0607348	0.235309	0.132669	0.157461	0.0922761
'rcbA'	0.300715	0.437746	0.435612	0.236647	0.250107	0.429657	0.229884	0.369919	0.562216	0.263433	0.181443	0.169779	0.0582323	0.0607348	0.0588272	0.265338	0.052487	0.184552
'ralR'	0.180429	0.0875493	0.0622302	0.118323	0.0625268	0.0716094	0.114942	0	0.187405	0.0526866	0.120962	0	0	0	0.176482	0	0.209948	0.138414
'recT'	8.66058	6.47864	7.90324	7.21773	6.12762	6.73129	5.34481	7.55691	6.18437	3.68806	3.8103	3.05602	3.84333	3.15821	3.70612	4.77609	4.30394	3.09125
'recE'	16.5393	16.4593	14.2507	15.382	15.9443	14.6799	13.8505	14.4268	14.9299	9.37822	9.01165	8.0928	6.58025	5.10172	7.47106	7.56214	7.76808	6.22864
'racC'	1.263	1.83853	2.0536	0.946587	0.937902	1.79024	0.919537	0.686992	0.937026	0.31612	0.181443	0.622523	0.407626	0.364409	0.411791	0.0663345	0.419896	0.46138
'ydaE'	0.120286	0.175099	0.0622302	0	0.125054	0	0.114942	0.158537	0	0	0	0	0	0	0	0	0	0.046138
'kilR'	0.180429	0.175099	0.12446	0	0.125054	0	0.0574711	0	0.124937	0.105373	0.0604809	0.056593	0.116465	0.0607348	0.0588272	0.265338	0.052487	0.138414
'sieB'	3.12743	2.45138	2.36475	2.24815	1.56317	2.00506	2.47126	1.7439	1.81158	0.842986	1.14914	1.01867	2.38752	2.49013	0.823581	1.19402	0.52487	0.415242
'ydaF'	0.300715	0.262648	0.497842	0.118323	0.250107	0.572875	0.344826	0.158537	0.37481	0.210747	0	0.056593	0.174697	0.182204	0.117654	0.0663345	0.052487	0.138414
'ydaG'	0.962287	1.05059	0.622302	0.828264	1.25054	1.00253	1.72413	1.26829	0.999494	0.31612	0.544328	0.226372	0.582323	0.12147	0.294136	0.398007	0.52487	0.738209
'racR'	126.541	126.246	132.488	120.927	138.684	146.37	133.505	124.715	143.115	60.0628	72.0932	71.3637	79.8947	75.0075	69.122	84.7092	76.9985	75.7587
'ydaS'	3.30786	3.50197	4.29389	3.43138	3.93919	3.43725	3.56321	2.74797	4.06045	1.36985	1.63298	1.35823	1.57227	1.5791	1.52951	1.65836	1.67958	1.01504
'ydaT'	3.12743	3.93972	3.79604	4.61461	2.75118	3.15081	2.93102	3.54065	3.7481	1.21179	0.846733	1.81098	1.39757	1.5791	1.41185	1.39303	1.78456	1.47642
'ydaU'	6.61572	5.77825	6.47194	5.44288	5.3773	5.08427	6.1494	4.91463	5.18488	2.52896	2.8426	2.03735	1.9799	2.24719	2.35309	2.78605	3.20171	2.39918
'ydaV'	3.48829	2.27628	3.11151	2.60312	4.25182	3.65208	3.10344	3.32927	2.81108	1.63329	1.45154	0.792302	1.28111	1.27543	1.17654	1.12769	1.73207	1.29187
'rzoR'	0	0	0	0	0	0	0	0	0	0.105373	0	0	0	0	0.0588272	0	0	0
'trkG'	27.9665	25.4768	27.5058	26.5044	30.7632	33.7996	31.0344	29.8577	32.2337	14.0146	12.2776	12.0543	14.3834	13.1795	10.883	17.9767	15.4837	13.1032
'ynaK'	1.32314	0.963042	1.74245	1.89317	1.25054	1.43219	1.26436	1.37398	0.937026	0.210747	0.725771	0.339558	0.698787	0.364409	0.882409	0.265338	0.472383	0.23069
'stfR'	18.4037	17.5974	16.4288	17.1569	18.1328	21.0532	17.5287	18.0732	16.804	7.27076	9.01165	8.65873	10.8894	9.96051	7.88285	13.1342	12.2295	10.7502
'tfaR'	4.69115	3.58952	2.86259	3.66803	3.68908	4.583	4.25286	3.06504	4.68513	1.10642	0.967694	1.18845	1.8052	1.5791	2.11778	1.39303	2.62435	1.56869
'pinR'	7.57801	7.61679	6.78309	7.21773	7.81585	8.16347	7.75859	7.45122	10.4322	1.68597	2.23779	1.6412	2.79515	2.73307	2.76488	3.05139	2.88679	2.44532
'ynaE'	2.947	2.88913	2.6759	1.89317	3.68908	4.01013	3.62068	2.80081	5.12241	1.05373	1.75395	1.07527	0.524091	0.364409	0.823581	0.530676	0.577357	1.43028
'uspF'	95.928	93.24	89.0515	79.6317	67.9666	86.1461	79.3676	74.0894	66.279	60.9584	65.9847	53.9331	112.097	120.984	92.5941	155.554	139.825	97.9049
'ompN'	3.18758	2.97667	3.54712	2.48479	2.37602	2.36311	2.47126	2.64228	3.24836	1.05373	1.02818	1.30164	2.32929	1.27543	1.70599	3.6484	3.2542	1.24573
'pfo'	326.576	309.837	313.765	295.927	302.755	295.532	299.539	295.248	293.539	430.555	445.684	415.675	367.853	384.816	335.904	550.776	543.556	537.37
'ydbJ'	86.9065	84.1348	96.2079	114.3	112.048	100.826	111.724	108.28	96.7011	52.4232	48.2033	43.9161	76.2261	68.7518	69.5338	74.6927	75.2139	83.0485
'hslJ'	76.0207	70.2145	77.4144	79.1584	82.3478	80.9903	76.6664	76.3089	78.3978	50.948	45.9655	36.3893	40.6461	40.4494	46.1206	55.3893	48.3405	45.5844
'ldhA'	65.3754	67.5005	65.404	57.2685	55.0861	65.8807	59.0228	63.1504	59.1576	86.933	74.2706	55.4045	20.8472	23.8688	44.4146	93.3327	77.6808	44.2003
'ydbH'	101.702	96.917	98.0748	98.2085	95.9786	97.3888	92.2411	89.5203	91.6411	68.9141	70.0369	76.9664	77.7983	77.5583	74.5929	88.7556	87.7058	76.543
'ynbE'	3.66872	2.88913	3.54712	3.31306	2.87623	2.07667	2.70114	2.43089	3.31082	1.47523	1.45154	2.03735	1.51404	1.88278	1.58834	1.52569	1.88953	1.75325
'ydbL'	19.6066	17.1597	19.8514	20.5883	20.3837	20.4087	21.8965	20.7154	23.3632	10.1158	8.46733	9.79058	12.7529	10.082	11.8831	12.2719	10.0775	9.96582
'feaR'	5.23243	4.72766	4.85396	3.5497	3.87666	4.29657	4.25286	3.4878	3.49823	7.63956	6.29001	8.48895	11.6465	10.993	8.6476	9.4195	7.87305	8.81237
'feaB'	27.5455	20.7492	25.0166	29.2259	29.075	31.0785	27.7011	26.8984	29.0478	13.962	12.6405	13.0164	13.1605	13.8475	15.9422	23.4824	20.5749	17.2095
'tynA'	12.3293	14.3581	12.9439	11.4774	14.8188	13.4626	12.3563	12.7358	13.8055	7.32344	7.31819	7.64005	8.15252	6.13422	6.70631	7.62847	8.76533	7.1514
'paaZ'	3.789	2.88913	3.79604	3.66803	3.62655	3.07921	3.21838	3.06504	3.24836	3.31926	2.90308	3.11261	2.21283	2.42939	3.00019	4.11274	3.41166	6.5516
'paaA'	1.08257	1.31324	1.61799	1.41988	1.75075	1.28897	1.20689	0.739837	1.24937	2.3709	2.66116	9.11147	1.51404	0.971757	2.76488	2.52071	2.09948	11.4422
'paaB'	0.781858	0.350197	0.497842	0.236647	0.312634	0.429657	0.689653	0.211382	0.249874	0.895673	0.483847	2.60328	0.232929	0.303674	0.823581	0.72968	0.839792	3.82946
'paaC'	1.32314	1.22569	0.995684	1.30156	1.18801	1.07414	1.14942	0.951219	1.31184	3.63538	3.50789	7.52687	1.39757	0.911022	2.05895	1.65836	1.52212	11.7652
'paaD'	2.70643	1.31324	2.11583	0.946587	1.81328	1.79024	1.7816	1.95528	2.12393	2.31821	1.87491	4.47084	1.6305	1.27543	1.82364	1.99004	2.4144	6.09022
'paaE'	3.06729	4.55256	3.67158	3.43138	3.31392	4.583	3.27585	4.01626	2.62367	5.79553	4.77799	11.4318	2.32929	1.5791	3.41198	4.11274	2.78181	18.4091
'paaF'	2.40572	2.27628	1.68022	2.24815	1.25054	2.00506	2.1839	2.21951	1.74912	2.63433	3.56837	6.79116	1.16465	1.63984	1.64716	1.45936	2.20445	11.9498
'paaG'	1.684	1.48834	0.871223	1.65653	1.37559	1.64702	1.89655	2.00813	1.68665	2.58165	1.14914	2.49009	0.75702	0.425144	1.9413	0.72968	1.15471	7.10526
'paaH'	7.99901	5.77825	5.9741	7.45438	6.25268	7.73382	5.91952	7.0813	5.62216	6.00628	7.01579	9.6774	3.84333	4.0085	4.41204	5.43943	4.61886	18.732
'paaI'	1.62386	2.10118	1.99137	1.30156	1.56317	1.86184	1.03448	1.26829	1.12443	0.684926	1.39106	1.52801	0.232929	0.485878	1.35303	0.928683	1.15471	2.99897
'paaJ'	12.0887	10.5935	13.6284	13.1339	12.4428	13.1761	11.954	14.374	12.3063	17.7554	13.4268	15.6197	13.1023	15.6696	13.7656	14.6599	14.329	29.2054
'paaK'	14.8553	15.7589	15.1219	15.382	16.6947	15.038	16.8965	14.2683	15.5546	15.0157	13.9106	17.4306	9.25893	7.95626	13.5303	12.0729	10.7598	28.8824
'paaX'	55.9329	52.1794	56.8162	49.9325	56.9619	51.2723	54.5975	51.5244	46.9138	42.6235	43.1229	43.9161	40.7626	47.4946	52.8857	87.2962	91.8523	63.6244
'paaY'	38.8523	33.1812	36.2802	40.9399	40.7675	38.0962	39.5401	37.9959	41.2291	25.7111	24.2528	25.8064	22.2447	21.6216	29.2371	50.8123	47.1858	43.0468
'ynbG'	0	0	0	0	0	0	0.0574711	0.0528455	0	0	0	0	0	0	0	0	0	0
'ydbC'	85.7638	86.4987	84.1353	67.326	76.0326	73.2564	86.6664	76.0447	72.151	49.6308	52.1345	35.9365	73.0815	79.8663	72.5928	100.099	112.165	72.1138
'ydbD'	8.9613	7.17904	7.34317	6.86276	5.43983	7.16094	5.91952	7.18699	6.1219	4.16224	3.38693	2.65987	5.00798	3.40115	4.5297	4.64342	5.30119	4.38311
'ynbA'	0.360858	0.350197	0.622302	0.35497	0.375161	0.143219	0.51724	0.422764	0.499747	0.210747	0.302405	0	0.232929	0.364409	0.294136	0.132669	0.052487	0.415242
'ynbB'	0.180429	0.175099	0.560072	0.118323	0.125054	0.143219	0.287355	0.105691	0.499747	0.368806	0.0604809	0.226372	0.232929	0.0607348	0.0588272	0.265338	0.052487	0.369104
'ynbC'	13.4119	12.1693	13.504	12.069	10.2544	13.6058	12.816	10.9919	13.1184	4.53105	3.99174	5.37633	7.80313	5.10172	6.17686	5.43943	6.40342	5.95181
'ynbD'	13.2916	11.8191	14.7486	10.0575	14.4437	12.9613	14.0804	13.2642	11.5567	5.69016	5.01992	5.6027	5.47383	5.76981	8.52995	6.69979	7.45316	7.24367
'azoR'	51.5425	48.8525	50.0331	46.1461	50.084	50.9859	44.9999	44.6545	43.1032	56.1113	50.7435	48.8963	52.8167	55.8153	54.0622	48.0925	48.3405	49.0909
'hrpA'	392.252	355.975	383.276	359.112	364.656	370.579	363.677	362.89	360.755	291.41	281.599	264.855	278.933	289.644	256.663	348.124	337.806	285.041
'ydcF'	87.3275	92.1018	86.1889	68.3909	69.0921	73.1848	62.2412	63.8902	62.3435	41.5171	47.2356	55.1216	37.4434	36.7446	29.8842	35.489	35.0088	40.1401
'aldA'	27.3049	22.3251	25.2655	17.0386	18.8206	19.621	20.5172	22.6179	19.8649	305.793	271.559	962.364	266.82	251.928	289.371	205.504	180.03	1235.44
'cybB'	61.0451	52.0043	54.5137	50.0508	45.2694	54.7812	57.5285	49.6219	50.5994	89.5146	93.9873	104.527	98.4126	94.8678	86.829	103.814	89.4904	104.826
'ydcA'	36.5068	31.4302	29.746	28.3976	32.8266	39.8148	31.7815	31.5488	33.5455	25.2369	26.2487	20.0339	28.8832	34.2544	28.8842	35.3563	31.8071	24.8684
'hokB'	16.3589	17.5099	19.4781	17.7485	18.9456	16.9714	20.862	18.4959	19.0529	16.9651	18.2652	13.5257	17.5862	17.9775	14.5303	18.9717	17.4782	15.2717
'mokB'	12.0887	13.3075	14.1263	14.0805	15.6942	11.8872	15	13.7398	14.9299	12.0126	12.3986	9.56421	15.1986	15.4874	10.2948	15.1243	14.0665	9.59671
'trg'	15.8176	14.5332	13.504	17.0386	17.6951	15.7541	16.4367	16.2236	15.6796	6.90195	7.43915	9.56421	9.66656	8.86728	8.88291	7.76114	8.76533	8.53554
'ydcI'	6.55558	6.91639	7.46763	8.16432	6.62784	6.80289	5.80458	5.39024	7.3088	7.4815	7.13675	22.5806	6.87141	8.1992	6.64748	6.96513	7.55813	31.8814
'ydcJ'	29.1092	30.9924	32.2975	36.207	35.6403	36.7356	36.2642	35.9349	30.9219	18.335	14.5759	11.1488	27.7768	23.3222	49.5325	106.799	105.919	50.475
'opgD'	185.24	191.47	199.323	185.768	191.332	192.987	187.758	181.049	185.219	128.977	126.466	142.671	102.081	92.1347	102.359	99.9661	84.0842	142.151
'ydcH'	31.0939	33.5314	35.7824	47.921	44.5816	44.4695	41.6091	37.626	33.9828	79.6622	79.4114	57.1023	157.052	179.593	129.243	263.149	256.714	121.758
'rimL'	44.7463	41.6734	44.1835	47.3294	49.8964	50.2698	48.3906	46.3455	46.1017	40.5687	38.4054	33.1635	63.0656	55.9975	54.0034	68.1256	66.3436	57.0266
'ydcK'	65.9768	64.7864	62.168	72.2956	74.2193	74.4738	72.4136	67.1666	62.1561	9.43091	8.46733	8.0362	14.4998	13.969	16.5305	41.3264	39.3128	18.3629
'tehA'	43.0022	35.545	36.1558	36.5619	35.0775	35.7331	37.9309	36.4634	39.9173	25.8165	26.5511	23.6559	22.7688	23.7473	27.8253	28.6565	29.2878	28.5133
'tehB'	105.551	104.884	118.611	108.266	114.424	113.358	117.126	106.008	110.569	53.1608	61.1462	50.8205	50.6039	60.1882	55.0035	63.6148	62.9319	52.3667
'ydcL'	249.232	251.266	290.428	267.766	297.315	310.928	262.7	248.163	241.315	50.7899	47.5985	43.237	84.0874	75.4934	82.4758	155.687	140.455	74.5591
'insQ'	82.6364	77.7437	83.5752	80.5783	86.5371	87.7932	88.9652	82.3862	89.8296	48.1556	50.1992	46.3496	59.1058	54.1754	50.4738	60.5634	58.5755	57.811
'ydcO'	10.6453	12.7822	10.6414	12.3056	13.1932	12.6033	12.931	12.2602	12.2438	21.9703	19.112	16.7515	28.0097	27.6343	24.4133	26.9982	25.3512	22.8383
'ydcN'	15.2763	14.0079	14.5619	14.6721	15.2565	13.5342	12.3563	14.1626	12.806	13.3824	13.1244	14.0351	13.2187	11.904	9.23588	12.3382	12.4919	13.1032
'ydcP'	95.7475	96.7419	98.386	90.8724	77.6583	86.1461	89.0802	84.8171	93.8275	50.2631	47.538	58.8567	35.9293	38.8095	37.7083	39.6681	33.5392	46.2303
'yncJ'	3.789	2.97667	2.6759	4.023	2.87623	2.86438	3.10344	2.27236	3.06095	2.42359	1.93539	2.03735	1.6305	1.70057	2.23544	1.9237	2.46689	2.26076
'hicA'	8.60044	8.57983	9.52122	8.51929	8.75375	10.5266	8.96549	9.82927	7.68361	3.68806	3.74982	3.28239	5.99793	5.46613	4.88266	6.10278	6.24596	4.15242
'hicB'	11.1264	10.8561	15.4953	12.1873	13.5683	13.8206	12.8735	11.6789	14.2428	6.21702	5.98761	7.13071	10.9477	9.71757	7.3534	11.0115	10.1825	7.93574
'ydcR'	31.0939	36.7707	33.8532	38.8101	35.6403	38.311	38.793	37.626	39.7924	19.9155	17.8419	21.6185	25.564	24.5369	21.5308	20.232	17.5307	22.6538
'ydcS'	47.7535	49.5529	50.0953	49.9325	50.084	56.7863	59.0228	53.4268	48.9128	15.2791	12.5195	8.43235	47.0517	55.5116	82.7699	200.529	206.326	84.4326
'ydcT'	18.4639	17.4223	20.1004	17.8668	19.5709	19.6926	23.6781	19.2358	18.4906	4.58374	3.68934	2.65987	12.3452	14.2727	27.2958	54.527	62.0397	26.068
'ydcU'	13.1713	12.8697	12.6327	13.0156	14.8188	15.5392	15.4022	14.1626	14.3053	4.58374	5.01992	3.33899	5.99793	7.65259	14.0597	26.1358	23.5142	14.718
'ydcV'	5.71358	7.17904	7.28094	7.33605	11.4424	11.2427	12.0689	8.56097	9.99494	1.5806	1.33058	1.41482	3.02808	2.55086	5.8239	10.5472	10.4974	5.90567
'patD'	50.2193	42.9867	46.9838	64.9596	61.5264	69.8908	70.4595	65.6341	59.6573	11.7491	10.2213	10.4697	18.2267	17.5524	18.1776	30.5139	31.4922	19.9316
'yncL'	56.7749	66.8876	55.0115	60.4633	59.6506	61.9421	48.3906	44.3374	45.1022	12.4867	11.2494	9.50762	16.7709	18.8278	16.2951	22.8854	19.4727	9.59671
'ydcX'	7.09687	5.77825	5.41403	6.74444	5.68994	9.02279	5.45975	5.60162	6.68412	2.10747	2.66116	2.20713	2.38752	2.12572	2.76488	4.31174	4.0415	2.99897
'ydcY'	134.119	129.923	118.486	112.881	92.0394	99.1074	92.5859	105.321	91.7661	90.7264	96.709	102.829	91.7741	100.212	95.5943	113.167	119.303	120.374
'ydcZ'	25.5006	28.7162	30.3061	29.4625	32.3263	26.209	29.4827	27.0041	28.1108	14.0146	12.9429	13.9785	12.8111	10.8108	11.2948	11.8075	12.4394	14.5335
'mnaT'	75.0584	72.9285	75.5475	79.9866	77.5957	77.7678	78.9078	75.5162	80.3344	34.2463	34.4136	34.3519	34.9394	32.3109	32.9433	33.1673	34.2215	41.8472
'curA'	131.172	104.271	126.887	145.065	160.631	156.538	153.333	145.431	149.424	32.4023	31.1477	23.9954	32.086	31.0355	47.9442	77.8104	73.3769	48.1681
'mcbR'	25.8013	20.4865	23.5853	21.8898	27.3242	26.0658	26.0919	21.8252	27.4236	3.21388	2.35876	4.0181	3.9598	4.25144	6.17686	10.3482	7.24321	7.28981
'yncD'	20.5087	18.5604	18.6068	26.6228	23.5726	26.3523	24.885	21.4553	26.4866	10.5373	9.91887	35.8799	8.56015	8.13846	7.29458	6.96513	7.08575	22.1001
'yncE'	2865.39	3102.66	3065.03	3049.55	3045.37	3058.44	3154.82	3091.09	3031.15	21.3381	20.503	35.9931	27.5439	22.9578	33.8257	44.2451	46.7659	49.5984
'ansP'	16.6596	14.7958	14.9353	17.7485	13.5058	17.5443	16.6666	15.061	15.9294	16.7544	16.2089	18.9021	9.026	8.50287	7.7652	9.75118	9.81507	12.4573
'yncG'	25.9817	26.3523	25.5144	24.8479	31.3259	24.3472	25.862	24.7845	28.1732	1.36985	1.51202	0.905488	2.44576	2.67233	4.17673	7.42947	6.03601	4.47539
'yncH'	0.421001	0.262648	0	0.591617	0.312634	0.429657	0.632182	0.317073	0.312342	0.15806	0.0604809	0	0	0.12147	0.0588272	0.199004	0	0.046138
'ydcD'	0.842001	1.57589	1.49353	0.828264	1.18801	1.79024	2.06896	1.58537	1.74912	1.26448	0.725771	0.905488	0.815252	0.850287	0.470618	0.663345	0.997253	0.784347
'ydcC'	2.64629	2.27628	2.42698	1.30156	1.6257	1.64702	1.49425	1.90244	1.3743	0.737613	0.967694	0.339558	1.16465	0.668083	0.823581	1.26036	0.997253	1.10731
'pptA'	19.0052	21.4496	19.7892	20.47	19.6334	18.9765	17.5287	17.3862	15.742	5.05792	6.41098	6.28182	8.50191	7.53112	6.94161	11.3432	9.81507	7.75119
'yddH'	17.1407	16.897	18.2957	15.6187	20.4463	20.1222	17.8735	18.6016	18.4906	7.06001	6.89482	4.47084	10.773	11.0537	9.58884	20.431	18.6329	11.5807
'nhoA'	14.0734	11.8191	15.1219	15.8553	15.0064	16.8282	17.3563	17.3862	15.6171	9.27285	7.13675	7.07412	6.75495	6.68083	6.52982	8.49082	7.03326	9.87354
'yddE'	70.7281	73.7165	75.672	77.5019	80.0343	77.0517	84.7698	81.4349	87.7056	38.0398	38.5263	35.7668	39.598	37.4126	32.6491	39.9997	40.31	42.0779
'narV'	5.83386	7.61679	7.84101	8.51929	9.25396	10.0969	10.1149	10.6219	9.30779	2.31821	2.72164	2.65987	3.02808	2.91527	2.94136	9.68484	8.39792	2.99897
'narW'	6.49544	5.16541	4.54281	6.0345	6.69037	5.94358	8.39078	7.02845	8.3083	1.47523	1.2701	1.13186	2.27106	1.94351	2.11778	7.23046	6.14098	1.89166
'narY'	16.6596	15.146	15.5576	20.47	21.009	19.2629	22.1838	21.561	23.1758	4.21493	4.05222	4.8104	7.10434	7.28818	5.00032	17.5123	19.9451	6.04408
'narZ'	55.2112	55.7689	57.3763	54.3105	63.5272	62.0854	68.2756	62.3577	67.9031	16.2275	17.1766	16.0724	19.042	19.1315	22.7661	69.5186	69.0204	28.0058
'narU'	16.4792	18.4729	18.4824	17.6302	24.5105	23.4163	20.862	18.6545	22.0513	2.84508	2.66116	4.47084	7.5702	8.07773	11.4125	36.484	32.1745	16.8865
'yddG'	42.7616	43.3369	47.0461	33.3672	35.5777	36.3776	39.5976	35.3008	36.2941	29.8733	34.3532	24.2784	13.8593	12.8758	14.295	11.3432	8.81782	14.026
'fdnG'	65.9167	73.0161	71.0669	57.0319	45.8947	56.4282	54.4251	54.9065	48.6629	2319.79	1329.91	1600.56	2900.55	3027.08	1735.82	1619.29	1626.68	996.167
'fdnH'	15.5169	15.934	16.0554	13.2522	12.7555	14.5367	15.4597	13.4228	15.3672	712.06	498	420.429	598.046	652.838	246.427	233.166	268.839	141.828
'fdnI'	15.2763	18.2102	15.8687	12.424	12.943	16.1121	13.9655	14.9024	13.9305	417.436	324.722	303.282	384.682	419.738	141.95	132.669	155.047	83.3715
'yddM'	37.2285	36.0703	38.9561	36.4436	39.7045	40.2445	44.9424	39.7398	44.3526	17.7554	22.3779	24.1652	14.4998	13.2402	14.5303	18.9717	15.5886	30.7279
'adhP'	223.13	225.089	227.14	249.426	288.624	264.812	271.206	243.089	240.816	18.1242	16.2694	16.5817	19.5078	19.9818	22.5897	60.1654	59.0479	37.0027
'maeA'	306.488	298.543	316.192	302.435	312.321	310.642	316.551	304.707	315.216	675.97	618.296	600.848	630.539	596.051	609.627	972.398	862.939	982.51
'sra'	1030.55	1048.66	1075.03	1164.66	1448.5	1534.88	1179.08	986.414	1123.37	35.0366	38.3449	28.1267	80.7682	89.4016	92.2411	249.683	214.777	79.8188
'bdm'	2.76657	2.01363	1.99137	3.07641	2.93876	3.58047	2.12643	2.21951	2.5612	0.263433	0.302405	0.452744	0.232929	0.242939	0.411791	0.72968	0.629844	0.138414
'osmC'	637.816	598.837	592.432	616.82	693.672	652.648	624.883	555.565	553.532	46.4169	49.5339	46.8024	80.5353	82.903	93.8294	217.047	224.277	83.3253
'ddpF'	24.2977	22.2375	21.7183	24.7296	28.6373	22.3421	23.3333	21.8252	25.0498	4.37299	4.83847	4.41425	5.18267	5.76981	7.1181	9.75118	9.92005	8.76623
'ddpD'	5.47301	5.95335	4.91619	5.91617	3.5015	4.79783	5.1724	5.07317	5.43475	2.63433	2.5402	3.56536	2.03813	2.06498	2.29426	2.65338	3.04425	5.5827
'ddpC'	6.07444	5.8658	4.85396	5.91617	6.31521	5.08427	5.34481	5.54878	7.55868	2.79239	3.93126	3.62195	3.31924	2.67233	4.00025	4.84242	4.25145	6.04408
'ddpB'	2.40572	1.83853	1.86691	2.48479	2.68865	3.0076	1.72413	2.16667	2.74861	1.73866	1.5725	2.20713	1.51404	1.2147	1.88247	2.52071	2.15197	4.56767
'ddpA'	5.29258	4.99031	6.34748	4.37797	4.4394	6.37324	6.37929	5.07317	5.18488	2.95045	2.5402	4.0181	3.55217	2.7938	2.88253	4.44441	3.93653	7.33595
'ddpX'	0.721715	1.48834	1.12014	2.0115	1.31306	0.859313	1.20689	1.26829	0.749621	0.579553	0.907214	1.24505	1.16465	1.5791	1.52951	1.39303	1.67958	2.44532
'dosP'	59.2408	60.3214	57.7497	57.1502	58.275	55.2109	54.8849	51.7886	57.1586	5.42672	4.05222	5.54611	5.24091	4.31217	4.76501	7.89381	7.08575	4.42925
'dosC'	76.0808	65.5744	61.7946	61.8832	64.9028	60.5816	50.747	50.6788	52.0986	1.42254	1.33058	1.30164	2.79515	1.76131	2.35309	5.24043	5.09124	2.35304
'yddW'	59.4814	61.5471	61.9813	67.7993	72.9062	69.0315	62.7584	65.2642	66.9037	25.1842	24.5552	27.8437	28.068	29.8815	23.4721	23.0181	19.7876	24.4532
'gadC'	4191.48	3905.48	4133.33	7508.92	8663.21	7862.43	6612.22	6273.13	6461.73	13.3297	17.5999	10.2433	14.791	12.5721	20.5895	21.7577	27.2408	24.1763
'gadB'	6761.63	6555.86	6785.46	12023.7	13359	12024.4	10485.4	10110.5	10311.3	15.0684	25.0391	14.4878	19.2749	21.1964	28.4136	40.8621	49.1279	36.772
'pqqL'	97.8525	107.335	112.574	116.785	109.609	118.442	146.666	148.443	152.423	6.79658	7.74156	8.60213	11.4718	10.2034	9.11822	13.1342	11.9146	7.98188
'yddB'	113.009	122.219	126.95	123.293	105.358	122.595	144.942	148.654	142.49	6.00628	6.71338	5.88567	6.40555	5.83054	7.05927	8.29182	8.39792	4.6138
'yddA'	48.1745	44.5626	50.7799	45.7912	41.0801	46.1165	54.3102	49.6748	56.0342	0.842986	1.14914	1.92416	0.75702	1.15396	1.00006	1.65836	1.25969	0.876623
'ydeM'	1.684	1.92608	1.86691	1.5382	1.68822	1.64702	1.26436	1.26829	1.12443	6.00628	6.9553	4.13129	31.5619	39.5991	22.2367	26.4675	39.3128	4.70608
'ydeN'	11.1866	9.89307	8.33885	8.40096	8.56617	8.30669	7.64365	7.87398	7.49621	76.7644	74.573	52.0089	375.365	395.869	216.19	269.65	317.966	54.3968
'ydeO'	1.32314	1.40079	1.36907	1.30156	1.31306	1.28897	1.60919	1.32114	1.1869	0.31612	0.302405	0.56593	0.815252	0.303674	0.294136	0.464342	0.839792	0.276828
'safA'	0.180429	0.262648	0.186691	0	0.0625268	0.0716094	0.0574711	0.158537	0.124937	0.15806	0	0	0.116465	0	0.0588272	0.132669	0	0
'ydeP'	30.0113	26.1772	24.6432	19.9967	17.7576	20.6235	21.2643	18.1789	17.6161	8.2718	6.53194	7.07412	7.80313	9.35316	6.94161	9.15417	8.34544	7.79733
'ydeQ'	1.20286	2.01363	1.55576	1.06491	1.25054	1.14575	1.14942	1.32114	1.1869	0.368806	0.544328	0.509337	0.407626	0.303674	0.176482	0.530676	0.314922	0.415242
'ydeR'	1.14272	1.40079	1.12014	0.828264	1.06296	1.21736	0.804595	1.26829	0.687152	0.210747	0.362885	0.452744	0.407626	0.485878	0.117654	0.862349	0.629844	0.415242
'ydeS'	0.661572	0.262648	0.560072	0.236647	0.500214	0.429657	0.51724	0.581301	0.499747	0.368806	0.181443	0.056593	0.349394	0.12147	0.352963	0.199004	0.209948	0.23069
'hipA'	36.206	33.4438	34.7867	26.5044	28.5747	27.6412	26.6666	28.1138	24.8	33.2453	30.7848	29.6547	48.6822	40.8745	37.5318	39.3364	36.0586	23.6688
'hipB'	9.20187	8.14208	7.90324	7.21773	6.31521	7.51899	7.64365	6.13008	5.37228	7.95568	8.95117	8.26257	13.1023	11.4181	10.1771	11.9402	10.4449	7.24367
'lsrK'	28.628	28.2784	29.5594	22.3631	25.1358	26.1374	26.724	27.2154	24.9249	34.0356	37.6796	37.4645	19.3914	18.2204	34.1786	34.9583	34.484	41.0629
'lsrR'	28.207	26.615	30.0572	22.5998	26.1987	25.7078	23.8505	26.2114	25.1748	56.5328	57.9407	57.2721	32.7265	33.1612	49.4737	52.537	53.4318	53.0126
'lsrA'	7.81858	8.14208	8.21439	6.38947	6.12762	7.01772	5.91952	6.60569	6.18437	17.492	17.6604	18.5625	12.0541	13.3009	28.5312	28.1922	33.4342	28.2826
'lsrC'	4.99186	4.55256	5.47626	3.19473	4.4394	3.0076	4.25286	4.12195	3.62317	5.69016	5.44328	6.96094	3.20278	4.73731	9.76532	9.28683	10.2875	12.3189
'lsrD'	3.54843	4.72766	4.35612	4.25964	3.12634	3.29403	3.79309	2.58943	3.37329	4.21493	3.93126	5.99886	2.85338	2.55086	6.70631	4.31174	6.29844	9.0892
'lsrB'	10.8257	8.84247	10.2058	9.82085	9.31649	9.0944	11.1494	9.88211	7.68361	5.74284	9.07214	10.4131	4.19272	5.46613	10.2948	8.55715	8.81782	20.0239
'lsrF'	10.4047	13.5701	11.9482	11.2407	11.5675	12.3168	13.5632	11.0447	11.4317	7.53419	9.31406	8.8851	4.77505	4.49438	8.94174	7.82748	6.98077	19.5164
'lsrG'	4.45058	5.42805	4.23166	5.67952	5.31478	5.80036	4.13792	3.91057	4.18538	2.89777	2.78212	3.67854	1.74697	2.24719	3.17667	3.78107	3.20171	6.22864
'tam'	75.3591	66.5374	70.9425	75.9636	82.1602	86.5042	76.494	72.187	69.5898	10.9061	10.4632	8.48895	12.7529	15.7303	20.5895	34.7593	34.7989	20.2546
'yneE'	24.3579	24.4262	26.1367	33.9588	25.8861	29.3599	27.6436	28.4309	28.3607	4.84717	5.0804	4.867	6.23085	6.49862	7.1181	9.68484	9.44766	6.09022
'uxaB'	19.1856	16.1091	19.1669	23.783	20.8839	21.5544	18.908	19.6585	19.9274	48.8932	50.562	43.4634	57.417	65.1684	57.1212	58.1091	62.4071	56.473
'yneF'	18.2233	18.9982	19.9759	21.8898	20.5088	19.0481	22.931	20.0284	21.4267	11.1169	13.7896	14.6576	8.85131	11.9648	11.7066	13.4659	13.6466	14.718
'yneG'	22.1326	19.611	23.2741	25.6762	29.7002	24.562	27.816	23.5163	30.2972	13.8039	13.9711	15.0537	12.1123	9.41389	11.4125	11.9402	13.1218	15.1333
'glsB'	52.5649	51.3914	56.9407	43.543	50.1465	49.2673	53.2757	55.5935	53.5354	31.7174	31.3291	35.8234	18.1685	15.9125	21.2366	16.451	15.4837	29.4822
'sad'	64.4732	57.4323	58.123	64.6046	61.839	58.9346	60.8044	58.3943	56.7838	33.8775	29.5752	31.975	29.5238	30.2459	32.0608	45.4392	40.1001	33.081
'yneJ'	23.7565	21.2745	26.2612	24.6113	24.6981	22.4854	22.0114	21.9837	21.3017	15.7006	13.5477	16.9779	10.0742	9.7783	10.5889	9.28683	9.92005	14.0721
'yneK'	1.50357	2.27628	2.17806	1.65653	1.81328	1.64702	2.35631	1.90244	1.62418	0.63224	0.786252	0.792302	0.640555	0.728818	0.764754	0.928683	0.682331	0.553657
'ydeA'	31.3946	27.0527	29.4971	32.8939	34.0771	36.1628	33.9654	30.5976	35.4196	6.16434	8.28588	6.28182	7.74489	7.10597	7.29458	8.75616	10.0775	6.5516
'marC'	77.1634	74.592	75.6097	81.0516	83.9109	85.5733	84.5974	83.9715	81.4588	27.2917	29.0913	30.1075	26.3792	27.5129	27.4723	46.1025	52.5395	44.4771
'marR'	10.2844	9.01757	9.52122	8.75593	10.6921	9.45244	8.44825	9.9878	9.87001	9.22016	10.7656	11.262	9.3754	10.082	8.4123	10.2819	8.66036	10.704
'marA'	8.48015	9.36777	8.89892	7.80935	6.56531	8.30669	7.06894	7.34553	8.43323	17.2285	17.7209	20.4867	23.7005	17.4916	13.0596	27.1308	21.6247	17.0711
'marB'	4.14986	4.20236	3.23597	3.31306	2.18844	3.07921	3.90803	3.91057	3.99798	8.00837	8.40685	9.96036	8.15252	8.01699	6.17686	11.0779	10.1825	7.79733
'eamA'	24.4782	22.9379	23.7719	21.4165	23.6351	26.4955	25.9769	26.1585	25.737	8.64061	8.34636	10.017	9.31717	10.082	10.4712	10.8125	10.7074	13.1032
'ydeE'	27.1846	26.0897	26.5723	26.3861	27.0741	26.7103	26.4367	23.9919	29.3601	12.7502	12.9429	15.5065	13.277	13.3009	13.5891	13.3332	10.4449	16.6558
'yneM'	43.8442	41.1481	36.9648	26.8594	24.0728	31.0069	27.3562	25.7358	29.4851	36.0377	34.1112	36.8986	33.7747	36.5624	30.2372	98.6395	92.2197	46.6456
'dgcZ'	29.3498	28.6286	30.9907	32.5389	29.075	30.5056	31.724	28.8008	30.7969	11.5384	13.6082	13.0164	9.72479	8.32067	9.05939	19.5024	17.5307	21.6849
'ydeI'	44.2652	41.8485	46.5482	40.4666	43.4561	49.7685	41.0918	39.8455	40.542	1.36985	1.75395	1.86757	2.50399	2.30792	2.70605	10.3482	10.2875	3.78332
'ydeJ'	20.1479	21.4496	19.2914	19.76	18.1953	19.3345	17.0689	16.5935	17.1163	3.21388	2.47972	3.45217	2.67869	2.30792	3.17667	5.5721	4.88129	4.10629
'dcp'	258.254	241.461	269.955	236.055	243.854	261.518	215.459	221.106	216.953	188.46	185.011	165.534	149.715	155.36	171.54	224.675	191.788	167.204
'ydfG'	423.346	406.229	407.67	431.999	439.188	443.978	413.274	399.882	409.855	308.006	338.935	280.418	368.261	383.054	369.847	425.602	414.542	312.17
'rspR'	122.21	122.569	128.132	136.782	138.497	134.912	151.379	141.626	157.733	61.5907	81.0444	71.7599	68.4812	57.2729	56.18	55.7873	52.2771	65.839
'ydfZ'	695.854	744.344	640.162	650.661	531.29	590.706	472.125	589.703	492.563	59.9574	65.5613	53.7633	84.9609	93.3494	43.591	66.9315	52.0671	16.0099
'ydfI'	18.0429	16.9846	17.7978	16.092	13.8809	14.0354	14.4827	15.6951	14.5551	6.26971	5.74569	6.56478	5.82323	4.61585	4.58852	7.23046	6.61336	4.38311
'ydfK'	2.947	1.66344	4.16943	1.89317	4.62698	5.08427	4.25286	3.64634	5.43475	0.94836	1.2701	1.5846	1.45581	0.364409	0.529445	1.06135	1.36466	3.36808
'pinQ'	7.15701	6.3911	6.53417	4.37797	6.62784	5.37071	5.74711	5.76016	6.30931	2.26553	1.99587	1.47142	2.09636	1.94351	1.58834	3.18406	2.67684	2.21463
'tfaQ'	2.46586	2.45138	3.17374	0.591617	2.12591	2.21989	1.43678	3.38211	1.24937	1.10642	0.967694	0.56593	0.465858	1.33617	0.294136	1.39303	0.367409	0.415242
'stfQ'	4.57086	3.76462	3.79604	3.66803	3.93919	3.65208	4.31033	3.91057	3.24836	1.89672	2.96356	2.32031	0.989949	1.94351	2.17661	3.11772	2.09948	2.35304
'ynfO'	2.76657	2.01363	2.55144	2.36647	1.81328	2.2915	2.06896	2.16667	1.93652	1.63329	2.41924	1.6412	2.44576	2.55086	2.00013	2.38804	2.20445	0.645933
'ydfO'	1.92457	2.10118	1.18237	1.5382	1.31306	1.14575	1.49425	0.951219	1.3743	1.52791	1.2701	1.75438	1.16465	1.45764	1.23537	1.99004	1.83705	1.47642
'gnsB'	91.8984	95.2536	110.21	95.2504	99.4176	113.286	84.1377	83.1788	84.1449	51.3695	52.0136	57.7814	60.8527	56.8478	66.3571	64.5435	57.5258	39.6326
'ynfN'	0.120286	0.350197	0.684533	0.118323	0.437687	0.214828	0.402298	0.211382	0.749621	0.263433	0.0604809	0.113186	0.0582323	0	0.117654	0	0.104974	0.046138
'cspI'	4.27015	3.76462	3.48489	3.19473	5.00214	5.2991	4.59769	4.01626	4.935	1.21179	1.20962	1.35823	0.465858	0.607348	0.6471	0.331673	0.944766	2.12235
'rzpQ'	0.962287	1.22569	0.995684	0.828264	1.31306	0.644485	1.32183	1.10976	0.937026	0.63224	0.362885	0.396151	0.174697	0.242939	0.411791	0.265338	0.367409	0.276828
'rzoQ'	0	0	0	0	0	0.0716094	0	0	0	0	0	0	0	0	0	0	0	0
'rrrQ'	0.781858	1.22569	0.995684	0.946587	0.875375	0.644485	0.919537	0.951219	1.1869	0.47418	0.362885	0.509337	0.407626	0.242939	0.470618	0.398007	0.682331	0.507519
'ydfR'	0.481143	0.525296	0.995684	0.35497	0.875375	0.787704	1.14942	0.581301	0.937026	0.31612	0.423366	0.452744	0.349394	0.364409	0.352963	0.0663345	0.472383	0.23069
'essQ'	0.421001	0.525296	0.311151	0.473294	0.125054	0.429657	0.402298	0.264228	0.249874	0.31612	0.0604809	0.282965	0.174697	0.0607348	0	0	0.262435	0.0922761
'cspB'	36.8676	33.2687	38.2716	35.1421	48.5208	44.1114	58.2182	45.8171	62.4059	20.0209	27.7607	38.0305	10.6565	9.04949	11.3537	14.5936	13.4367	57.5803
'cspF'	11.6677	9.45532	14.7486	11.9507	12.1927	13.4626	12.0115	10.4634	13.3682	3.74075	5.62472	6.84775	5.88146	4.61585	4.05908	4.64342	4.14647	7.47436
'quuQ'	7.51787	7.87943	8.77446	7.33605	9.62912	9.66727	9.5402	8.19105	8.55817	2.63433	2.96356	3.16921	2.62045	3.03674	3.8826	4.11274	4.0415	3.46035
'ydfU'	3.54843	3.23932	2.48921	4.25964	3.12634	3.43725	3.73562	3.43496	2.99848	1.94941	1.99587	1.69779	2.38752	1.88278	1.70599	2.71972	2.09948	1.84552
'rem'	5.41286	3.93972	5.78741	4.73294	4.12677	4.583	4.59769	3.38211	4.43526	1.42254	2.72164	2.49009	2.85338	2.6116	2.00013	3.38306	3.72658	2.67601
'hokD'	36.5669	35.9827	34.7245	36.4436	31.1383	33.5132	32.9309	32.8171	27.2362	22.2338	21.5312	19.9773	17.1785	20.2247	14.648	23.1508	24.7214	18.6398
'relE'	47.0919	53.1424	53.2691	45.4362	46.0822	43.1089	44.7125	45.0244	43.4155	23.4982	26.6116	21.5619	27.835	28.4239	22.5897	39.2037	36.5835	25.5143
'relB'	25.1397	27.0527	26.5101	23.9013	21.7593	21.3396	21.839	23.252	23.8629	12.1179	12.58	12.3939	15.8974	13.7868	12.4714	18.242	17.3207	12.6418
'ydfV'	5.89401	7.09149	5.91187	4.73294	4.12677	4.22496	6.20688	5.39024	4.37279	1.42254	1.51202	1.52801	1.57227	1.33617	1.17654	1.59203	1.46964	1.75325
'flxA'	8.23958	9.80552	8.71223	6.50779	7.06553	7.23255	6.32182	7.50406	7.80855	1.05373	1.63298	1.92416	1.68874	1.3969	1.47068	2.52071	2.62435	1.66097
'dicC'	0.240572	0	0.186691	0.35497	0.250107	0.286438	0.689653	0.47561	0.249874	0.263433	0.181443	0.113186	0.407626	0.242939	0.0588272	0.132669	0.157461	0.369104
'dicA'	92.7404	93.7652	96.8925	95.3687	105.92	116.365	99.2525	95.1748	99.9494	47.0492	54.2514	49.5754	60.911	52.5356	48.709	74.162	60.9374	59.8872
'ydfA'	0.661572	0.612845	0.995684	1.77485	1.00043	1.00253	0.51724	0.686992	0.624684	0.263433	0.362885	0.56593	0.698787	0.242939	0.411791	0.928683	0.629844	0.415242
'ydfB'	0.661572	0.437746	0.933453	0.946587	0.875375	0.358047	0.862066	1.05691	0.437279	0.31612	0.362885	0.339558	0.291161	0.12147	0.0588272	0.398007	0.52487	0.23069
'ydfC'	6.07444	4.55256	5.16511	4.49629	4.75204	4.79783	5.34481	4.0691	3.43576	1.47523	2.41924	2.88624	2.62045	3.21894	2.5884	2.52071	2.88679	2.07621
'dicB'	0.601429	0.262648	0.12446	0.236647	0.375161	0.429657	0.114942	0.369919	0.249874	0	0.0604809	0.056593	0.0582323	0	0.0588272	0	0	0
'ydfD'	0.180429	0.0875493	0.186691	0.118323	0.18758	0.0716094	0.0574711	0.369919	0.249874	0.0526866	0	0.113186	0	0.0607348	0	0.0663345	0.052487	0.138414
'rspB'	10.104	8.84247	9.33453	6.98108	7.81585	7.01772	8.85055	8.98374	8.4957	2.89777	3.08453	2.65987	3.31924	3.40115	2.64723	3.11772	2.67684	2.39918
'rspA'	5.17229	6.3911	6.22302	6.50779	5.00214	6.80289	6.60917	6.97561	5.68462	6.95464	4.59655	5.71589	5.64853	4.67658	4.23556	4.31174	5.51114	4.15242
'ynfA'	12.3293	11.7316	11.3881	11.2407	10.5045	14.4651	10.4023	12.1016	11.0569	8.37718	6.89482	6.84775	6.92964	7.28818	8.23581	6.96513	4.93378	7.56664
'ynfB'	76.6822	77.1309	74.2407	65.7878	62.0891	68.3154	69.6549	73.878	65.9666	55.1102	50.8644	49.8018	64.4049	66.5653	57.7095	73.4323	69.1779	55.0888
'speG'	89.9738	83.3469	88.118	72.059	63.8398	70.1056	75.9768	74.2479	74.025	71.8119	70.5812	65.7044	78.7301	72.5781	63.8864	93.001	84.0842	58.3646
'ynfC'	48.0542	44.3875	49.9709	39.9933	45.2694	45.2572	42.9884	42.4349	39.1677	18.6511	18.7491	21.0526	28.1844	25.5694	23.8839	24.4111	25.4562	21.5926
'ynfD'	57.4966	62.5977	59.741	66.9711	69.5923	74.617	67.8159	69.3862	57.5334	18.9145	20.9264	17.374	26.9033	32.0072	28.7077	74.8917	67.6033	30.0359
'ynfE'	230.648	221.762	230.625	153.229	169.948	196.21	192.701	213.284	182.658	62.0122	128.885	40.181	26.7286	27.7558	30.8255	37.7443	29.1303	31.5584
'ynfF'	216.815	193.571	214.943	191.447	177.263	228.506	231.321	228.293	221.7	61.4853	132.09	41.5958	31.8531	32.7968	31.6491	36.484	35.5862	20.8544
'ynfG'	35.1836	30.1169	30.1194	30.8824	31.8261	34.9454	42.8159	40.0041	39.2926	9.90509	20.1401	7.35709	5.93969	6.01275	4.5297	4.77609	6.77083	3.96787
'ynfH'	80.8922	74.5044	70.0712	88.2693	84.2861	90.1563	96.9537	101.146	99.6371	30.9271	52.3765	25.863	23.817	21.075	18.8835	24.2784	24.5114	21.9156
'dmsD'	79.7495	74.9422	71.8137	85.1929	82.2852	90.4427	91.0342	98.6097	104.01	42.4127	46.9332	38.5398	24.2246	23.7473	22.825	28.1922	30.1276	39.4942
'clcB'	18.4037	18.5604	18.109	19.0501	19.3208	16.1121	20.2873	19.2886	19.1778	7.58688	8.40685	9.84718	8.09429	5.76981	7.64754	6.89879	5.72109	8.35099
'ynfK'	395.019	387.23	366.972	281.255	279.432	295.031	294.079	311.789	276.797	218.913	220.15	231.918	251.098	230.063	225.544	209.153	209.108	222.016
'mlc'	122.15	124.057	140.64	117.85	113.549	123.669	134.712	131.797	125.437	219.387	230.674	302.206	171.145	180.868	220.426	251.541	234.302	422.671
'ynfL'	28.9287	26.8776	27.6925	21.0616	24.2604	21.9125	24.9424	22.8293	21.6141	13.2243	13.9106	13.4125	14.2087	13.969	19.1777	20.829	21.0473	16.1483
'ynfM'	83.8392	73.4538	79.3435	91.9373	76.0951	82.9953	88.9077	75.8862	86.3938	23.3402	24.9786	23.4861	24.574	26.2374	25.3545	27.2635	26.7684	28.8824
'asr'	11.1264	13.7452	14.4996	15.9737	16.257	17.3295	14.8275	13.3699	12.3063	2.89777	4.47559	3.11261	4.01803	5.76981	5.29445	10.8125	13.9615	6.73616
'ydgU'	0.962287	0.787943	1.05791	0.946587	0.875375	0.859313	0.689653	0.634146	0.687152	0.47418	0.604809	0.282965	0.465858	0.607348	0.411791	0.862349	0.52487	0.692071
'ydgD'	126.541	116.003	121.349	116.667	122.24	123.311	114.885	117.37	105.821	34.1409	38.8892	34.8047	60.7945	57.0907	60.7685	102.023	96.3137	63.3937
'mdtI'	3.48829	3.76462	2.92482	2.83976	2.18844	3.15081	3.50574	3.22358	2.93601	3.10851	3.87078	2.09394	1.9799	1.15396	1.41185	2.71972	2.99176	2.53759
'mdtJ'	5.59329	6.30355	7.28094	2.72144	2.75118	3.65208	3.67815	3.32927	4.12291	7.32344	8.83021	4.35766	3.49394	2.91527	1.88247	5.30676	3.98901	5.99795
'tqsA'	19.5465	14.7083	20.3493	18.5768	13.5058	15.9689	16.0919	16.2764	17.0539	19.7575	21.7731	18.7323	21.4877	24.8405	21.119	29.7179	30.7574	25.4682
'pntB'	638.477	584.304	611.163	559.67	568.056	578.031	597.699	581.089	541.726	588.562	559.085	522.466	441.983	455.815	540.622	504.275	530.486	539.308
'pntA'	713.055	683.497	696.481	644.626	641.9	682.223	668.389	648.045	607.88	637.298	606.563	608.318	597.929	601.032	660.689	580.361	542.086	619.68
'ydgH'	248.45	209.243	263.732	275.102	269.053	323.102	276.953	303.069	261.18	173.076	148.178	133.446	151.928	149.954	153.01	173.332	144.444	170.388
'ydgI'	32.8982	31.5177	28.5014	26.5044	28.9499	28.5005	27.9884	25.5244	32.546	10.0631	9.97935	11.262	6.46378	6.86303	9.11822	10.6799	9.55264	10.2426
'folM'	39.4538	38.1715	36.8403	38.3368	37.0159	36.1628	41.6091	36.252	38.3556	10.1158	9.4955	12.0543	10.3071	9.53536	10.7066	12.7362	13.2267	11.027
'ydgC'	10.525	9.89307	11.6993	6.98108	10.442	11.6007	9.42526	9.88211	10.7446	4.05687	5.44328	4.58403	7.16257	7.16671	5.70624	6.56712	5.72109	5.49043
'rstA'	107.716	115.565	113.321	101.64	89.976	98.1049	99.8847	95.3333	93.8275	100.631	99.9749	110.017	62.3085	49.6203	66.8277	67.6612	68.0232	58.5953
'rstB'	116.617	127.647	125.892	113.354	107.108	107.629	112.873	113.776	111.506	96.8907	106.688	95.4158	56.3106	55.2079	67.3572	78.4738	72.852	59.149
'tus'	31.8156	35.2823	33.6666	29.3442	29.6377	26.7819	28.1034	31.7073	28.1108	24.2359	23.7085	26.5987	24.5158	23.0185	21.0602	25.4725	27.5557	24.5916
'fumC'	11.9083	9.71797	9.39676	14.6721	12.5054	11.7439	13.6206	11.4146	11.7441	67.3335	70.8836	128.466	46.0617	45.0652	52.5916	82.7855	68.9679	264.417
'fumA'	34.943	37.3835	35.9068	43.543	35.5777	38.3826	37.816	37.2032	37.0438	551.418	456.147	734.747	519.199	516.367	596.096	614.855	546.442	1331.04
'manA'	334.034	325.596	340.586	302.435	326.702	326.467	317.815	317.39	306.345	240.673	264.06	218.958	235.899	251.685	242.133	291.408	263.222	252.283
'ydgA'	929.569	932.049	949.696	878.552	988.611	982.983	960.054	918.138	930.717	334.507	337.544	320.712	391.962	415.183	445.087	837.009	823.049	534.371
'uidC'	2.46586	1.92608	2.80036	2.24815	2.5636	2.43472	1.83907	1.69106	1.87405	6.16434	5.3828	8.26257	2.32929	2.00425	3.64729	2.25537	1.15471	7.05912
'uidB'	2.16515	3.23932	3.04928	2.0115	2.50107	3.0076	2.41379	2.80081	2.62367	15.1738	13.6687	16.3554	4.30919	4.1907	7.1181	6.10278	5.30119	11.5807
'uidA'	6.01429	6.216	7.03202	5.5612	6.12762	5.01266	7.47124	5.70732	6.68412	72.6549	71.7908	81.2675	19.566	19.3137	39.8849	26.3348	25.2987	52.7358
'uidR'	54.7301	55.3311	57.8119	56.5586	58.275	58.2185	55.4596	54.9593	55.8467	76.2376	77.8389	72.2692	82.4569	85.1502	72.0634	100.497	97.5734	110.224
'hdhA'	575.989	538.253	553.04	416.972	439.813	468.397	373.849	354.276	322.962	116.648	108.866	107.979	164.797	171.272	138.303	350.313	306.052	87.4316
'malI'	32.417	34.3193	35.9691	28.161	31.576	31.8662	36.4941	38.5244	34.7949	38.8301	43.4858	40.5206	46.12	50.1669	45.8264	51.0113	56.2136	52.0899
'malX'	30.0715	32.9185	31.613	30.5274	34.2647	30.8637	32.8735	32.6057	30.7969	80.1891	84.4918	96.491	95.268	91.3451	96.5943	64.7425	69.3354	80.2802
'malY'	56.7148	59.3584	55.5716	59.1617	57.4621	56.9295	52.7584	53.3211	52.1611	65.8583	64.0493	75.6082	81.5252	77.5583	79.3579	72.3046	73.8492	86.1859
'add'	88.2898	72.7534	88.3669	98.4451	103.044	103.762	89.0802	80.1666	95.0769	465.539	489.895	476.4	260.706	266.747	308.961	268.058	246.532	399.648
'ydgJ'	199.915	187.355	182.708	203.753	212.153	198.788	208.965	198.699	215.016	75.6053	68.4039	73.5143	83.971	80.3521	70.828	82.3212	80.3051	80.0495
'blr'	85.4631	86.4111	77.5389	65.3145	70.03	69.8192	67.471	69.7561	67.0286	84.1932	70.5812	91.9636	107.322	87.6403	100.948	93.399	86.1312	84.571
'cnu'	60.8045	61.1094	61.1101	63.303	70.2801	69.8192	56.0343	51.6301	57.7833	15.0684	10.8866	22.241	22.7106	16.3984	17.9423	15.9866	12.9118	21.3158
'ydgK'	90.876	94.6407	81.5216	75.372	81.0972	80.9903	74.54	70.3902	75.3369	25.9218	23.2851	37.8041	37.5016	24.3547	29.8254	26.3348	22.4644	33.1271
'rsxA'	36.5068	35.3699	35.0356	33.8405	31.2634	30.6488	33.5631	31.3374	37.1062	10.1158	9.61646	15.2235	12.0541	7.89552	8.4123	9.48584	9.2902	16.8404
'rsxB'	36.627	33.8816	33.791	29.4625	27.1366	22.7002	30.1723	27.7439	33.7954	10.1158	8.10444	13.2428	7.80313	8.68508	9.05939	7.0978	9.18523	15.1794
'rsxC'	101.16	101.119	101.995	94.4221	87.0998	87.8648	102.471	98.7154	104.697	46.4169	45.6631	58.5171	38.7827	32.068	30.296	40.2651	36.531	53.797
'rsxD'	27.6056	30.2045	31.9241	31.3557	33.4518	31.9378	34.3677	35.7236	34.9823	25.4476	25.7649	28.6926	30.2226	22.1682	13.8832	17.5123	16.9533	19.8394
'rsxG'	18.7045	18.2102	16.1176	20.115	18.6955	18.4036	21.4367	21.5081	20.9269	18.7038	18.3257	19.9207	26.0298	19.4959	11.589	18.1757	14.5914	15.6408
'rsxE'	17.8023	19.5235	17.7978	20.2333	17.6326	17.9024	19.0804	21.9837	23.3007	21.18	20.624	18.7889	22.8271	23.0185	9.53001	19.5687	19.7876	16.4713
'nth'	24.7187	23.0255	21.4072	25.3212	19.2582	22.2705	23.2183	24.3089	24.8624	24.4466	22.257	19.6378	28.6503	30.1245	15.9422	27.9268	28.448	18.8243
'dtpA'	959.821	1039.56	1165.51	1753.55	2104.96	1901.66	2097.64	1692.59	2139.54	260.483	248.697	284.663	130.848	124.142	178.599	121.392	105.446	212.743
'gstA'	131.112	111.188	116.806	113.117	104.482	120.519	106.494	110.5	109.132	59.3252	57.5778	57.8946	102.838	106.164	86.1231	136.782	129.013	93.1527
'pdxY'	75.5997	80.4578	88.0558	99.9833	92.9773	95.0973	106.781	99.9309	99.8245	100.105	95.1365	97.3399	68.4812	56.5441	63.0628	65.7375	63.6668	88.5389
'tyrS'	543.752	480.208	532.566	469.034	460.135	487.66	500.458	508.902	490.002	380.45	347.342	354.329	220.584	216.216	236.662	256.317	221.338	288.455
'pdxH'	132.314	122.394	141.698	162.103	144.937	159.689	140.114	144.744	144.489	78.5031	73.0609	71.2506	93.9287	84.3606	83.5935	82.2548	65.1889	71.514
'mliC'	8.48015	9.63042	8.71223	10.7674	8.56617	9.66727	8.85055	9.35366	9.4952	7.69225	6.71338	5.6593	6.17262	6.01275	8.17699	8.55715	8.45041	8.21257
'anmK'	55.6924	47.8019	53.6425	57.9785	60.776	65.1646	63.0458	63.1504	62.0311	54.3726	46.9937	44.4255	46.0617	43.8505	54.3564	66.5999	64.769	72.8058
'slyB'	1409.93	1379.6	1345.92	1341.91	1289.18	1293.62	1293.1	1316.86	1216.07	1042.04	1046.86	941.99	1167.44	1168.29	1041.89	1309.78	1485.33	967.469
'slyA'	167.799	182.102	189.242	169.912	187.018	195.136	177.815	168.366	177.41	90.463	96.8299	94.1707	139.408	135.682	128.773	163.913	135.154	136.476
'ydhI'	9.62287	13.395	11.8237	8.75593	10.1293	9.59566	9.77008	10.8333	10.7446	6.48046	6.04809	6.56478	9.25893	4.85878	7.3534	9.48584	9.7101	6.87457
'ydhJ'	18.8849	20.6616	19.7892	18.8134	16.8197	19.979	19.7126	18.7602	17.6161	12.9082	13.0639	13.2428	12.0541	12.8758	9.58884	12.1392	11.7571	14.2105
'ydhK'	39.4538	37.8213	36.0935	47.921	41.8304	43.7534	46.724	43.9675	41.7289	18.8091	22.015	19.7509	17.7608	15.9125	17.2952	26.9318	25.7711	20.1623
'sodC'	111.565	108.386	112.699	136.664	134.308	137.347	124.367	119.272	125.437	26.2906	28.426	23.5993	34.0659	32.4931	36.4729	74.2947	73.6393	41.7088
'ydhF'	223.912	223.776	220.731	219.372	236.039	231.871	229.367	219.573	223.137	194.941	225.715	187.21	195.253	215.548	224.308	305.205	334.972	240.979
'ydhL'	16.2987	17.6849	14.873	18.8134	18.0702	18.4036	20.6321	16.6463	15.1174	4.84717	5.14088	4.69722	7.27904	5.46613	7.29458	10.4145	13.7516	8.39712
'nemR'	22.6739	23.0255	20.3493	17.0386	17.2574	19.1197	20.1723	21.4553	18.9904	9.64165	9.25358	10.1301	11.9376	10.6893	12.2361	15.0579	13.1218	11.3038
'nemA'	126.902	135.264	131.119	135.244	136.558	138.636	152.241	162.13	148.987	56.6908	56.5496	59.7622	47.3428	42.4536	45.0617	64.9415	60.3601	58.2262
'gloA'	288.866	293.815	298.892	274.984	292.875	307.133	280.459	273.053	266.365	158.745	174.911	148.443	220.875	225.144	200.424	261.026	250.101	146.719
'rnt'	45.1072	48.6774	49.2863	45.3179	49.5212	50.6279	52.4711	50.3089	58.3455	22.3918	22.0755	25.0141	19.2167	18.4026	16.1775	17.5123	15.4312	20.9928
'lhr'	147.891	146.032	152.34	166.126	161.319	166.062	172.643	167.256	173.162	63.8035	61.5696	52.7447	60.5616	66.3831	69.7691	87.2299	85.6588	51.3978
'grxD'	134.54	136.577	131.244	123.411	124.053	125.03	123.161	124.874	125.187	197.628	204.849	213.356	195.66	195.505	174.187	222.154	197.456	214.081
'mepH'	62.3081	57.2572	60.4256	54.9021	54.7735	61.7273	51.9538	58.2886	56.284	47.6814	43.7882	40.5772	78.7883	64.4396	65.2394	54.7923	53.0119	44.2003
'sodB'	89.1318	85.4481	80.3392	71.8223	65.8407	69.9624	69.9423	74.1423	62.5933	1440.14	1308.32	1243.29	1848.47	1887.82	1571.57	2029.24	1921.39	1409.19
'ydhP'	22.7942	20.5741	24.1453	26.8594	27.1992	26.8535	29.6551	24.5732	31.1717	6.3224	6.71338	8.14939	4.94974	4.85878	5.05914	5.30676	5.45865	9.04306
'ynhF'	53.1664	57.5199	55.3849	51.234	47.5829	53.349	54.4826	44.3374	50.0997	15.6479	18.0838	15.9026	27.8933	24.9013	20.0013	25.0081	25.8236	18.6859
'purR'	422.384	487.387	458.823	408.926	373.66	382.251	422.527	425.354	424.91	79.03	75.6011	90.8317	57.5917	51.2602	57.0036	49.6846	46.9234	67.3616
'ydhB'	28.3273	26.9652	25.2032	25.5579	28.7623	26.8535	24.2528	23.5163	25.1748	16.2802	17.9628	18.2229	16.9456	17.9168	16.8246	20.1657	19.1053	17.0249
'ydhC'	17.5016	15.0585	15.0597	15.8553	15.0064	16.6134	15.3448	13.4756	14.9299	80.874	81.8307	78.8906	37.851	38.3844	21.8249	40.5304	35.6912	103.995
'cfa'	2156.79	2003.56	2153.1	2336.41	2510.89	2379.44	2181.14	2241.5	2161.34	215.014	230.19	178.721	243.294	263.65	228.603	357.344	353.5	152.071
'ribC'	262.945	256.082	261.429	250.136	235.914	251.206	243.965	248.638	241.066	165.699	181.927	178.834	147.502	155.481	157.539	172.204	168.693	158.069
'mdtK'	139.171	130.536	125.954	106.728	103.982	102.616	109.885	103.947	103.76	33.8775	38.4659	38.8228	43.1501	47.0087	41.7673	43.3828	41.4123	50.2443
'ydhQ'	415.407	350.547	386.263	392.242	414.365	415.836	419.022	421.126	396.175	282.137	269.019	247.028	198.514	208.26	267.958	448.554	401.736	363.983
'ydhR'	165.994	156.451	172.004	140.213	146.063	152.456	139.367	129.419	133.245	40.4633	47.538	45.048	78.6136	78.4694	62.1804	114.692	106.601	62.3786
'ydhS'	150.959	136.839	150.41	146.721	169.698	167.781	146.436	145.114	145.426	8.85136	10.8261	8.0928	18.4596	20.0425	27.0017	58.9051	57.9457	24.4993
'ydhT'	13.5923	12.6946	14.2507	13.3705	13.1932	11.6007	14.6551	13.2642	14.805	3.26657	4.17318	2.09394	4.36742	4.73731	3.35315	5.17409	4.51388	3.41422
'ydhU'	8.9613	8.49228	8.21439	10.2941	9.06638	8.95118	8.21836	9.45935	7.74608	3.31926	4.71751	2.49009	5.12444	4.25144	6.17686	5.83744	4.77632	4.2447
'ydhX'	5.95415	5.77825	6.90756	7.21773	6.19015	6.94611	6.49423	6.44715	6.24684	3.63538	5.26184	3.05602	3.9598	3.27968	4.58852	3.8474	3.67409	4.56767
'ydhW'	7.81858	9.01757	7.71655	7.09941	7.12805	5.37071	6.09193	6.71138	6.18437	4.7418	11.0075	4.30107	4.83328	7.83479	8.58878	7.69481	7.45316	4.79836
'ydhV'	8.84101	9.36777	8.21439	6.98108	7.75332	7.73382	7.3563	6.5	7.3088	26.3433	62.9001	15.1103	29.1744	27.6951	33.1786	18.7727	17.1633	20.4392
'ydhY'	2.46586	4.28991	2.6759	1.77485	1.81328	2.2915	3.85056	2.80081	2.43627	20.4951	51.0459	10.4131	15.1404	18.099	21.0013	8.22548	7.87305	12.365
'ydhZ'	31.996	34.4944	30.0572	32.7756	32.3263	34.8738	39.3102	33.7154	33.2957	11.0642	10.5237	9.28125	18.5761	18.2812	19.413	16.7163	19.5252	14.8103
'pykF'	1677.15	1730.67	1903.19	2192.89	2285.42	2469.38	2242.64	2181.3	2203.88	1160.21	1250.14	1142.16	996.995	998.602	718.163	994.686	898.998	666.233
'lpp'	19872.6	20842.2	18519.7	19899.3	18665.1	15571	20305.6	19492.3	18854.8	13189.7	13623.4	13143	13174.3	14837.1	12722.2	12912.7	17146.3	13788.4
'ldtE'	295.061	263.348	275.618	269.304	293.001	299.327	266.493	255.191	247.25	30.4529	29.3332	22.4674	64.7543	71.6063	69.3573	199.601	197.561	66.9924
'sufE'	39.995	38.4341	38.0227	47.0927	52.585	51.2007	52.3561	46.3984	50.1621	3.58269	4.29414	3.62195	4.07626	4.55511	5.58859	12.4709	12.282	4.89063
'sufS'	195.465	180.351	183.33	227.418	236.977	205.519	223.85	209.427	236.693	17.8608	19.3539	16.3554	16.0721	17.7953	24.4721	56.716	57.4733	24.0841
'sufD'	183.316	165.643	186.38	208.841	206.213	195.995	192.413	185.382	194.027	16.9124	13.9711	13.6955	15.8974	16.0947	22.8838	63.9465	64.0342	19.8394
'sufC'	97.5518	94.2905	93.9676	103.651	112.798	97.3888	96.379	88.9918	98.2628	8.6933	6.3505	6.28182	7.5702	8.50287	13.0008	35.1573	38.578	12.042
'sufB'	257.652	232.268	245.498	255.934	275.681	245.047	234.425	229.614	246.5	23.2875	19.4144	15.5631	24.6905	28.7276	43.0615	106.799	109.225	39.3558
'sufA'	80.9524	75.2048	75.9209	89.9258	76.4077	81.778	73.1032	70.0732	67.5283	4.95254	3.93126	3.45217	5.88146	7.04524	11.1183	28.6565	31.4922	10.5195
'ydiH'	124.556	119.855	123.589	170.386	206.026	217.406	174.597	157.11	181.533	5.37404	7.13675	5.54611	10.4818	12.3292	11.7654	14.3946	13.0693	5.85953
'menI'	39.7545	45.4381	44.3702	52.7723	47.958	49.9834	49.8849	51.5244	48.7878	17.5447	17.1161	18.5625	14.3834	15.2444	16.4716	23.2171	24.5639	28.5133
'ydiJ'	516.928	572.835	574.261	574.224	587.502	567.576	617.584	627.276	618.375	139.303	140.558	150.65	136.846	144.488	190.365	213.465	207.429	225.569
'ydiK'	221.988	207.492	211.832	211.799	218.594	197.141	203.85	202.715	199.774	75.6053	76.3874	68.5341	64.7543	69.845	65.0629	97.1801	100.408	75.2512
'ydiL'	1.56372	2.01363	1.2446	0.946587	1.18801	1.07414	1.26436	1.84959	1.1869	2.63433	3.08453	2.65987	5.06621	5.16246	4.47087	5.7711	5.03875	2.81442
'ydiM'	2.34557	1.48834	2.6759	1.77485	1.81328	1.57541	2.1839	1.47967	1.87405	1.00105	1.14914	0.679116	1.45581	1.70057	1.11772	1.65836	1.31218	0.599795
'ydiN'	1.08257	0.875493	0.995684	0.828264	0.500214	1.00253	0.919537	0.581301	0.562216	0.421493	0.241924	0.452744	0.524091	0.303674	0.235309	0.597011	0.367409	0.322966
'ydiB'	4.27015	6.65374	5.66295	4.25964	4.18929	5.94358	4.82757	4.96748	3.62317	0.842986	2.05635	2.32031	2.03813	1.70057	2.29426	2.78605	1.6271	1.52256
'aroD'	112.467	102.958	108.778	112.762	110.485	108.202	112.413	120.593	112.506	47.8922	47.4775	45.1046	30.7466	27.9987	30.3549	38.4077	40.0476	54.9504
'ydiF'	3.90929	3.32687	2.98705	3.07641	2.93876	3.0076	3.21838	3.01219	3.37329	2.31821	2.72164	1.75438	1.39757	1.5791	1.35303	3.38306	3.14922	2.62987
'ydiO'	4.87158	5.3405	5.04065	5.20623	6.0651	5.44232	6.72412	6.44715	5.37228	3.1612	3.08453	2.94283	3.08631	2.67233	2.52957	4.51075	6.24596	2.86056
'ydiP'	23.5159	21.9749	25.8255	18.3401	18.5079	17.4011	17.4137	17.8618	14.4927	11.1696	9.55598	11.7713	13.9757	13.5439	11.7066	12.4046	14.7489	10.2426
'ydiQ'	3.66872	4.02727	3.60935	3.66803	3.12634	4.15335	4.7701	3.80488	3.37329	1.84403	1.75395	1.75438	1.6305	2.49013	1.41185	2.65338	2.15197	1.47642
'ydiR'	9.50258	9.71797	10.0813	7.69102	10.0043	9.73888	9.1379	8.40244	8.93298	3.58269	3.62885	3.50876	3.9598	3.09747	4.00025	4.77609	5.03875	4.01401
'ydiS'	6.73601	6.47864	7.15648	7.69102	6.87795	5.58553	7.87354	8.13821	7.24633	4.16224	3.26597	2.65987	2.73692	2.36866	3.00019	5.3731	4.14647	2.67601
'ydiT'	1.263	0.875493	0.435612	0.709941	0.687795	0.572875	0.459769	0.47561	0.937026	0.105373	0.423366	0.282965	0.174697	0.546613	0.235309	0.132669	0.314922	0.553657
'fadK'	10.7656	9.89307	10.0191	11.4774	10.6921	8.59313	8.67813	10.6219	8.99545	2.89777	3.38693	3.73514	4.83328	3.82629	4.00025	4.84242	4.67134	4.65994
'ppsA'	161.003	158.114	134.044	119.27	101.418	116.079	107.988	105.902	114.942	48.4717	35.5628	29.3718	129.858	105.496	78.1226	138.772	118.936	128.771
'ppsR'	67.6608	67.6756	62.4169	65.1962	69.1546	63.2311	57.1837	59.0284	61.5314	17.8081	19.5958	19.468	42.3349	44.3364	25.2957	62.6861	56.0037	42.447
'aroH'	252.6	237.346	320.299	549.257	666.661	627.442	340.516	322.305	485.942	28.3981	30.5429	34.5783	29.1744	26.7233	24.5898	28.9219	26.0336	35.5724
'ydiE'	20.9297	20.3114	22.2162	26.3861	25.761	25.0633	21.7815	20.4512	23.9879	1.05373	1.93539	1.30164	1.39757	1.94351	2.17661	2.98505	3.67409	2.21463
'ydiU'	61.4661	61.6347	57.2518	69.3375	68.1542	66.3103	69.0802	61.3536	76.2739	34.9312	29.6961	35.2574	36.9193	34.9225	45.8852	60.2318	57.3683	52.8742
'ydiV'	37.2285	38.4341	42.7522	30.8824	41.5803	38.311	36.0918	35.4593	39.48	16.2802	17.7209	13.6389	32.7265	32.2502	22.9426	21.5587	21.2048	25.6528
'nlpC'	122.09	126.071	121.66	106.136	101.481	105.481	103.333	104.317	94.0774	68.2819	70.3393	64.0067	94.5692	90.6163	86.8878	101.027	101.667	72.9443
'btuD'	100.318	94.3781	100.813	87.5593	94.3529	93.2355	106.436	101.041	104.947	29.768	28.6075	25.9196	31.0378	27.8165	30.4725	37.7443	37.4232	34.6497
'btuE'	183.195	183.678	188.122	168.256	197.397	193.059	200.919	184.695	196.9	41.9913	43.5463	40.4074	45.6541	43.0002	40.179	64.2782	62.9319	50.7519
'btuC'	52.3845	53.8428	48.2907	57.6235	50.8343	56.4282	61.8963	60.5081	58.4704	41.2536	44.272	41.992	46.5276	46.4014	40.4731	48.3579	44.4565	47.799
'ihfA'	857.157	841.786	852.554	841.635	905.075	852.081	896.261	890.183	909.477	363.749	369.962	361.799	345.609	359.003	325.55	485.104	500.359	415.289
'pheT'	2002.46	2124.73	2009.17	1993.87	1916.88	1831.12	2141.03	2099.5	2082.95	1846.93	1788.3	1895.13	1324.49	1168.9	971.12	1232.1	1282.57	1532.66
'pheS'	576.53	606.103	594.548	550.677	511.907	510.862	583.389	573.162	579.519	500.418	485.48	537.407	321.5	269.055	258.546	272.569	242.28	396.741
'pheM'	6.85629	7.26659	8.15216	6.74444	5.87752	7.01772	6.60917	5.9187	6.74659	1.79135	2.5402	1.86757	2.67869	2.36866	3.05902	2.05637	1.46964	3.13739
'rplT'	1896.55	2031.67	1851.16	1728	1529.66	1517.83	1702.58	1695.81	1769.98	2003.25	2042.74	2175.66	1638.48	1602.55	1387.97	1068.45	1257.06	1599.93
'rpmI'	963.129	1033.52	1011.61	838.558	791.714	791.069	837.813	839.979	883.928	1016.8	1038.34	1092.13	978.128	888.793	754.283	616.248	633.518	797.773
'infC'	2944.3	3041.2	3034.84	2729.13	2646.88	2623.34	2797.69	2752.99	2891.41	2483.81	2587.92	2775.49	2514.7	2347.64	2009.54	1870.37	1921.81	2298.18
'thrS'	2630.83	2547.33	2571.35	2453.44	2419.35	2522.16	2556.31	2606.97	2644.29	1772.64	1879.5	1837.74	2287.89	2226.9	1755.64	2108.71	2056.34	1918.79
'yniD'	1.38329	2.36383	1.68022	1.89317	2.62612	2.43472	2.41379	1.84959	2.43627	1.31717	1.69347	0.792302	2.03813	0.850287	1.11772	1.32669	1.15471	1.15345
'ydiY'	20.9297	20.3114	21.7183	17.6302	19.5709	21.7693	21.1494	18.1789	23.1758	5.74284	5.56424	8.0928	7.62843	6.31642	4.58852	4.44441	5.30119	7.75119
'pfkB'	312.563	315.703	331.5	351.894	386.978	375.735	366.493	341.118	332.894	126.026	120.357	106.508	151.928	164.652	151.421	268.39	275.504	132.601
'ydiZ'	121.669	111.188	117.677	117.377	146.438	151.597	134.367	125.455	128.747	7.32344	8.52781	8.31917	15.3151	15.4266	18.3541	43.4491	38.0531	18.8243
'yniA'	305.887	295.216	309.533	294.034	315.823	319.306	341.666	307.667	302.472	214.066	236.359	145.048	354.518	403.583	290.901	434.889	527.022	249.468
'yniB'	69.4651	66.5374	71.8137	71.9406	76.7204	82.4224	70.7469	70.7073	73.9626	33.6668	34.1112	35.314	47.3428	43.7898	41.4732	52.4706	53.9042	44.108
'yniC'	85.7638	85.7983	84.0108	79.395	70.0925	74.1874	72.8158	75.1992	72.7757	58.5349	58.4246	65.8742	61.3186	52.9607	50.8267	49.8172	46.0836	69.8069
'ydjM'	4.69115	6.3911	4.97842	7.09941	4.87709	5.22749	5.34481	3.43496	6.1219	12.7502	13.4872	13.5257	11.7629	12.5114	8.70643	10.5472	9.97253	12.8264
'ydjN'	1090.15	993.859	925.363	835.482	598.256	605.744	581.665	734.975	746.06	48.5244	51.6507	42.6145	47.1099	48.102	48.5913	57.6447	62.8795	55.0888
'ydjO'	12.4496	10.0682	9.33453	6.98108	5.94004	5.87197	6.26435	5.44309	8.55817	0.210747	0.604809	0.396151	0.174697	0.0607348	0.294136	0.331673	0.787305	0.138414
'cedA'	17.4414	17.9476	17.1755	19.2867	17.8827	19.9074	16.2068	15.4309	18.0534	7.27076	9.1931	9.22465	8.90954	6.92377	6.88279	8.88883	7.92554	9.50444
'katE'	402.356	356.325	387.01	404.666	463.949	482.576	414.539	394.016	387.929	21.6542	16.8137	13.7521	38.8992	38.7488	47.1794	136.715	118.988	43.4159
'chbG'	23.576	24.7764	22.0917	22.2448	22.072	22.915	24.3677	25.8415	23.6131	9.74703	9.67694	10.1867	14.6745	13.7261	11.1183	14.6599	13.8566	14.2105
'chbF'	16.6596	14.8834	16.5532	13.6072	12.6304	13.3194	14.5977	12.4187	15.1174	5.26866	5.14088	6.28182	9.31717	6.43789	6.11803	8.35815	7.13823	7.38209
'chbR'	15.0357	14.3581	16.9889	16.6836	15.1315	15.5392	14.3103	15.3252	16.1793	6.84926	5.92713	8.60213	9.84126	10.4464	9.88298	10.8789	11.3897	10.5656
'chbA'	6.61572	6.82884	7.28094	6.15282	5.87752	5.80036	6.1494	7.23984	4.935	5.21598	3.87078	4.52744	6.40555	4.31217	4.76501	6.43445	4.67134	7.88961
'chbC'	10.2243	9.01757	10.0813	7.92767	8.25354	8.3783	9.19537	9.56504	10.3698	10.0105	7.923	9.73399	10.7147	10.2642	13.8244	12.2719	10.235	12.5495
'chbB'	25.0195	20.399	24.5809	24.3746	24.6356	23.3447	22.8735	24.0976	25.2372	28.7142	28.426	26.2591	43.7907	42.0285	41.6497	53.93	47.5532	48.2143
'osmE'	951.04	878.469	865.125	783.893	815.662	821.074	809.078	788.349	717.824	137.881	139.408	117.827	237.413	271.363	343.022	688.486	699.285	309.033
'nadE'	645.213	612.932	650.804	653.145	683.105	693.394	704.078	697.138	677.782	269.018	269.805	275.155	165.438	174.491	207.895	300.628	294.925	299.574
'cho'	25.1397	23.9885	23.4608	22.9547	24.8857	23.5595	23.8505	26.687	24.8624	11.433	11.6728	11.7147	16.8874	16.0947	11.7654	14.1956	13.1742	12.7802
'ves'	4.14986	3.85217	4.35612	3.90467	4.37687	2.79277	5.34481	3.22358	3.5607	2.3709	2.17731	1.98075	3.02808	1.70057	2.11778	1.99004	2.57186	2.39918
'spy'	25.1397	24.6013	25.8878	21.7715	24.0728	23.5595	20.4597	17.7561	18.8655	75.1311	83.5241	73.1747	31.9113	29.8815	26.4134	49.9499	47.4483	21.3158
'astE'	2.82672	3.32687	3.67158	2.83976	2.50107	2.86438	2.81608	2.27236	3.06095	1.79135	1.87491	3.39558	0.75702	0.850287	1.11772	1.45936	1.6271	20.7621
'astB'	10.2243	10.681	8.65	7.5727	8.6287	8.73635	9.08043	7.55691	8.55817	5.47941	5.32232	8.8851	2.56222	3.76556	4.58852	5.7711	4.67134	47.3376
'astD'	9.26201	7.44169	8.27662	10.2941	8.50364	9.59566	7.06894	6.28862	8.55817	7.16538	5.68521	10.7527	5.24091	4.43364	5.52976	5.90377	8.87031	52.5512
'astA'	2.76657	1.83853	2.0536	2.60312	2.12591	1.86184	2.41379	2.00813	1.99899	0.94836	1.5725	4.75381	0.989949	0.850287	1.05889	1.32669	2.30943	26.8985
'astC'	3.789	3.93972	3.11151	4.14132	3.37645	3.7953	3.9655	3.11789	3.81057	2.16015	2.11683	5.94226	1.45581	2.24719	2.76488	2.71972	2.4144	35.3879
'xthA'	79.8698	72.5783	77.1655	68.5093	63.3396	70.6069	71.2641	66.2154	66.0916	77.502	83.1008	88.4548	92.4146	76.951	61.4745	56.2517	51.7522	61.1329
'ydjX'	17.3212	18.0351	16.5532	12.3056	14.3186	15.038	15.1149	15.9593	14.3677	12.7502	9.97935	10.6961	27.1362	23.14	17.5893	13.1342	10.6549	9.04306
'ydjY'	13.2314	10.5935	12.446	9.1109	6.87795	8.09186	7.18388	7.87398	7.18387	13.8566	9.67694	9.11147	50.7203	48.2842	22.2367	9.95018	8.24046	5.85953
'ydjZ'	18.2835	16.0215	16.6155	13.3705	14.1311	12.46	11.8965	13.7398	13.8055	12.434	11.3704	10.7527	26.3792	26.0552	16.2363	9.35317	9.39518	7.93574
'ynjA'	18.5842	17.7725	17.9845	17.2752	15.1315	16.3986	17.816	15.9593	15.5546	12.1706	10.5237	8.31917	16.6544	15.791	12.942	7.76114	7.97803	9.4583
'ynjB'	50.3998	47.8019	47.9173	39.4017	39.3293	39.7432	40.8619	42.2764	39.1677	26.1853	23.1037	18.6191	37.6181	37.2912	21.1778	18.839	15.5886	17.5786
'ynjC'	21.6515	20.9243	22.0295	19.76	23.1349	19.9074	22.816	21.6138	21.3017	11.4857	11.1285	10.1867	13.3352	14.9408	9.58884	8.95516	8.55538	10.012
'ynjD'	11.6076	10.5935	12.5083	11.714	11.5049	11.6723	12.0115	12.2073	12.3063	6.16434	6.59242	4.92359	6.58025	7.89552	3.64729	4.64342	4.72383	4.65994
'ynjE'	86.7862	82.0337	79.3435	48.3943	50.6467	54.2799	52.4711	50.1504	53.8478	91.0425	76.2664	68.9302	143.95	137.078	80.711	40.3977	43.7742	35.1572
'ynjF'	26.6433	28.2784	28.5637	24.8479	29.075	27.4264	26.9539	26.9512	27.3612	13.8039	14.8178	13.1296	16.2468	13.5439	13.8832	14.5273	17.5307	13.6107
'nudG'	16.2987	16.4593	17.5489	18.9317	16.0069	15.3244	17.0114	18.9715	15.8045	7.95568	8.28588	9.62081	6.40555	5.83054	6.35334	4.31174	5.93103	7.70505
'ynjH'	5.71358	5.6907	5.91187	5.67952	4.62698	4.15335	4.88504	4.33333	5.30981	2.26553	2.60068	2.82965	3.26101	3.34041	3.29433	3.4494	3.41166	2.81442
'gdhA'	534.671	464.274	500.891	504.058	528.101	518.381	572.067	566.874	603.882	146.205	148.964	177.306	99.519	102.156	152.01	145.472	135.417	249.745
'ynjI'	16.9603	18.648	15.2464	21.8898	17.7576	19.9074	18.793	19.3415	21.9889	8.90404	8.28588	11.6016	5.82323	4.98025	8.29464	8.82249	7.50564	12.3189
'topB'	215.011	207.317	208.098	199.138	187.393	189.407	219.482	209.532	225.199	311.22	321.275	328.692	226	241.178	263.075	243.978	245.587	337.085
'selD'	334.094	308.786	308.849	268.003	249.544	273.047	283.045	287.85	268.364	400.102	415.746	406.168	385.323	407.045	366.376	421.689	436.272	432.544
'ydjA'	94.8454	75.6426	76.7921	68.9826	65.3405	72.1823	76.3216	78.8984	78.7102	110.484	99.733	107.923	129.276	141.026	128.361	162.851	149.85	173.341
'sppA'	223.972	219.661	223.033	226.353	223.471	218.838	240.976	235.532	255.995	176.342	176.665	188.738	143.543	142.848	135.538	151.243	142.712	234.427
'ansA'	126.721	130.273	133.733	106.491	107.546	108.488	120.804	111.028	119.002	55.2156	50.5016	58.5737	43.616	34.801	36.5317	27.6615	23.4092	39.3096
'pncA'	59.4212	67.4129	64.4083	57.0319	56.0865	53.7071	60.7469	61.4065	60.4069	28.0293	29.7566	29.8811	23.9917	22.5326	22.472	20.9617	23.1993	25.745
'ydjE'	6.07444	5.3405	5.04065	5.79785	4.81456	4.94105	6.43676	5.23171	5.37228	6.74389	6.10857	4.867	6.28909	6.19495	7.41223	4.70975	5.93103	5.99795
'ydjF'	23.576	23.0255	26.5723	16.9203	17.5075	19.7642	18.3907	20.5569	19.2403	38.5666	37.861	42.8409	64.9872	65.2292	56.8859	51.8073	51.0699	32.2505
'ydjG'	9.86344	10.1557	10.1435	8.75593	10.1293	10.1685	10.6321	10.5691	10.6821	23.0767	22.3175	16.8647	13.3352	12.9365	20.0601	12.6036	12.7543	15.7331
'ydjH'	3.368	2.18873	4.04496	3.19473	3.5015	3.22242	3.27585	3.59349	3.7481	16.1748	14.334	11.6582	9.08424	7.77405	11.1183	8.02648	7.40067	9.8274
'ydjI'	4.33029	3.23932	2.80036	3.43138	3.18887	3.72369	3.62068	4.54471	4.06045	15.7533	16.2089	13.3559	7.62843	9.04949	11.8831	7.76114	8.55538	10.1965
'ydjJ'	2.76657	2.71403	2.86259	3.19473	2.31349	2.07667	3.16091	3.17073	1.81158	10.4846	9.13262	10.7527	3.9598	3.46188	7.58871	5.30676	4.82881	7.88961
'ydjK'	3.42815	2.88913	4.66727	2.95809	4.18929	2.93599	4.02298	3.75203	4.24785	12.4867	11.9752	14.5444	4.94974	5.64834	8.58878	5.83744	6.98077	10.1965
'ydjL'	7.81858	6.0409	8.40108	7.69102	8.69122	9.23762	8.50572	8.8252	8.43323	20.7585	19.7168	24.335	11.7629	11.0537	15.9422	11.8075	11.6521	20.3007
'yeaC'	11.788	7.96698	9.14784	7.21773	9.44154	10.0253	10.862	10.1463	7.93349	34.3517	31.8734	47.9908	83.5633	84.2392	47.7089	59.2367	54.0091	75.0205
'msrB'	16.84	11.2063	13.7529	12.3056	15.2565	18.2604	15.977	17.0163	14.7425	43.045	40.6432	66.6665	125.083	127.604	65.7689	72.769	75.5288	80.9261
'gapA'	13845.3	14254.3	14604.9	17608.1	17146.2	18813.1	17215.9	17242.9	16691.5	11124.8	11709.7	10898.4	11253.1	11926.3	10693.6	12074.3	11336.7	9015.01
'yeaD'	109.28	102.608	120.478	232.861	225.034	255.502	220.229	222.797	215.266	241.568	225.775	199.603	365.116	382.447	380.553	340.495	331.77	221.186
'yeaE'	55.9931	57.4323	58.4964	60.8182	65.2154	64.3769	66.494	62.4106	69.1525	43.7826	47.2356	42.3315	32.1442	31.4606	30.649	39.3364	41.3598	47.0608
'mipA'	461.898	455.957	465.109	372.127	373.535	375.806	379.999	379.167	369.438	441.567	429.838	532.427	456.891	382.569	240.839	321.457	270.413	405.83
'yeaG'	863.652	785.492	833.325	852.047	922.52	945.316	848.675	828.882	791.162	39.9892	37.1958	23.4295	97.1315	104.221	142.715	444.839	435.8	152.394
'yeaH'	259.938	231.83	230.252	266.701	282.871	283.788	269.022	251.703	257.12	7.95568	7.74156	5.20655	14.4998	20.6498	30.3549	93.6644	103.032	26.8523
'yeaI'	11.0663	9.54287	11.2014	8.40096	8.56617	9.59566	7.3563	8.56097	7.62114	1.42254	1.87491	2.20713	1.92167	1.63984	1.9413	2.78605	1.83705	1.98394
'yeaJ'	39.2132	36.9458	39.205	26.1495	24.3229	21.7693	25.3447	23.7276	25.6745	10.2739	10.4027	17.4872	25.6222	26.2374	18.9424	22.4211	20.4175	22.1463
'yeaK'	113.73	115.653	109.152	100.102	88.8506	99.8951	93.9077	103.419	95.8265	54.1092	60.3599	56.2534	63.7644	59.1557	54.7682	76.0194	70.3326	64.9162
'yoaI'	2.947	3.41442	3.73381	2.0115	2.50107	2.72116	2.93102	2.74797	2.68614	1.73866	1.99587	1.47142	1.92167	1.33617	1.64716	1.85737	1.25969	1.56869
'yeaL'	18.4639	16.7219	17.8601	15.737	16.4445	16.3986	15.9195	16.3293	18.4906	7.74494	9.1931	7.35709	9.78302	8.56361	7.7652	8.49082	7.03326	10.5656
'yeaM'	20.9899	19.0857	20.4737	15.1454	14.6938	16.8282	16.6091	17.6504	18.0534	15.1211	12.0962	13.8087	16.1303	16.2162	16.2363	18.441	19.1053	13.0109
'yeaN'	10.7054	15.146	12.0727	12.1873	12.0677	10.0969	11.7241	11.1504	12.0564	17.65	19.2329	22.6938	14.2087	13.1795	11.4125	10.5472	9.60512	19.055
'yeaO'	75.8402	74.3293	76.1076	74.0705	70.4052	74.617	67.7009	69.7032	68.0281	33.6141	36.1071	34.4651	37.2104	41.2997	37.4141	59.5684	60.9899	41.0167
'yoaF'	15.4567	15.934	15.8687	16.2103	16.7572	18.1172	16.5517	17.8618	18.4282	12.0652	11.2494	11.3186	15.6063	16.2162	13.4126	15.9866	17.9506	18.8705
'yeaP'	107.656	108.298	112.014	119.98	116.362	119.015	127.241	115.098	132.246	46.4696	46.6913	51.1035	78.3807	68.9947	51.415	52.736	48.2356	50.2443
'yoaK'	3.24772	3.41442	3.85827	2.95809	3.31392	3.50886	3.04597	3.06504	3.06095	1.36985	0.907214	1.6412	2.27106	2.6116	2.23544	1.79103	1.94202	1.24573
'yoaJ'	2.16515	1.05059	1.68022	1.18323	1.25054	1.86184	2.24137	1.90244	2.06146	0.15806	0.66529	0.282965	0.349394	0.364409	0.470618	0.597011	0.367409	0.046138
'yeaQ'	531.724	502.095	515.266	551.742	603.446	606.102	577.297	556.727	569.399	27.3971	23.3456	20.3735	53.6902	56.787	63.7099	204.509	207.534	54.6736
'yoaG'	0.902144	0.700394	0.497842	0.591617	0.562741	0.644485	0.632182	1.00406	0.812089	1.5806	0.846733	1.92416	3.90156	6.13422	3.94143	5.30676	6.19347	3.41422
'yeaR'	1.32314	0.963042	1.2446	1.06491	1.18801	0.859313	0.862066	1.05691	0.937026	7.79762	2.35876	8.48895	33.7165	35.6513	39.8849	42.5204	39.1028	18.4091
'leuE'	37.469	40.0976	38.2716	27.3327	27.0741	32.9403	29.9424	27.7439	31.8589	20.8639	18.3257	26.4289	21.313	19.4351	19.3542	13.9966	13.7516	25.6066
'dmlR'	68.9839	71.09	69.4489	67.5627	70.0925	73.6145	70.1722	70.3902	67.4034	108.06	104.874	88.1153	163.866	157.668	151.539	169.816	191.525	171.172
'dmlA'	28.2672	31.9555	28.9993	29.2259	28.2621	26.0658	25.2873	27.0569	25.1123	11.9072	13.4268	12.6202	12.5782	14.7586	12.1772	14.7263	16.271	14.0721
'yeaV'	5.59329	3.76462	3.42266	3.78635	3.87666	3.22242	4.19539	3.43496	3.5607	3.79344	4.29414	3.67854	5.12444	3.82629	4.58852	4.24541	5.72109	5.02905
'yeaW'	2.16515	2.97667	2.36475	2.12982	3.18887	2.00506	2.1839	2.48374	2.49874	2.42359	2.29827	2.20713	1.9799	2.24719	2.47074	2.98505	1.94202	4.65994
'yeaX'	7.21715	5.60315	7.09425	4.73294	7.003	5.72875	6.03446	6.02439	5.55969	3.53	2.5402	4.0181	3.14454	2.7938	4.29439	3.71473	2.8343	4.6138
'rnd'	75.0584	77.2184	71.5648	78.9217	84.2236	86.0029	87.1836	87.0366	96.2638	40.6214	41.5504	48.5568	38.7245	36.2587	35.1199	33.8969	31.9646	64.0858
'fadD'	56.8351	60.4965	61.1723	55.1387	50.2715	53.0626	59.3676	57.3374	58.283	30.1894	33.5669	41.2563	26.6122	26.6018	23.2368	25.3398	26.8209	38.4791
'yeaY'	102.724	116.178	112.574	107.201	104.357	95.7418	94.1951	97.6057	98.3253	28.4508	33.6879	40.0112	21.6042	18.2812	21.4719	24.6764	27.6082	39.3558
'tsaB'	59.5415	67.0627	65.2795	62.7114	51.6471	50.413	62.4136	58.6057	61.4689	35.8796	36.7724	40.464	28.5338	24.4154	25.7663	19.5024	20.6274	28.9747
'yoaA'	84.3204	79.4072	88.5536	85.0746	80.1593	75.0467	91.6664	88.939	92.828	60.5896	61.0857	72.2692	39.1321	39.5991	40.179	39.469	32.9094	71.0987
'yoaB'	119.143	132.725	126.514	119.152	112.861	122.739	117.701	112.719	113.942	100.526	101.185	107.187	136.555	133.131	120.184	135.787	114.264	109.439
'yoaC'	80.0502	75.0297	88.3669	75.372	76.6578	81.4199	74.8848	68.3292	65.6543	13.962	16.2089	14.2614	25.8551	23.9295	24.4721	32.1059	30.495	22.2385
'yoaH'	48.4151	46.4011	47.9795	55.612	51.5221	51.2007	51.1493	48.565	52.286	17.9135	20.0192	20.5432	23.4676	24.2332	20.9425	25.2071	23.8816	25.1914
'pabB'	63.5711	58.5705	59.4921	60.5816	52.2724	57.7172	56.7814	60.191	57.4085	22.3918	24.6762	25.58	31.1543	24.8405	23.7074	26.7992	24.249	21.8233
'nudL'	49.1969	53.7552	50.6554	46.7378	46.645	53.9219	45.4021	45.9756	45.5395	22.2864	24.1319	20.4867	25.6222	24.051	21.4719	29.9832	30.18	26.1603
'sdaA'	337.221	330.061	306.982	269.777	238.602	232.229	259.08	270.675	252.435	237.143	230.614	269.496	235.957	232.918	181.659	272.104	289.203	296.483
'yoaD'	25.3202	26.615	27.3191	31.7107	32.764	32.081	28.9654	27.8496	27.5486	6.00628	6.89482	6.33841	10.4818	9.83904	8.47112	12.3382	11.2322	5.72112
'yoaE'	109.28	106.372	102.68	111.342	100.606	111.711	122.126	105.11	119.065	103.951	108.624	99.9432	113.495	118.797	86.0054	92.006	94.2142	77.6965
'manX'	1086.72	1040.61	1140.43	1272.1	1331.82	1474.44	1533.85	1349.04	1265.55	860.32	1043.48	1306.45	1306.73	1402.49	1407.15	1390.17	1486.75	1057.02
'manY'	801.224	771.396	822.746	1003.5	967.164	1092.33	1142.24	1016.01	933.09	778.392	915.379	1170.17	807.332	888.368	929.588	807.822	907.501	716.847
'manZ'	975.398	929.686	1004.08	1274.46	1266.1	1386.43	1435.8	1264.8	1186.59	849.572	1071.42	1433.95	804.421	911.265	1106.42	865.798	966.496	847.971
'yobD'	15.9379	14.5332	16.7399	25.2029	25.9486	28.1425	28.1034	23.1992	24.8	14.8049	19.6563	29.0888	19.4496	18.9493	22.4132	14.8589	19.8401	18.9627
'mntP'	1.98472	1.66344	1.55576	1.18323	1.81328	2.21989	1.60919	1.47967	1.81158	6.42777	8.52781	8.8285	7.16257	5.34466	4.23556	2.98505	3.41166	5.2136
'rlmA'	50.2193	58.4829	50.0331	53.2455	50.1465	54.996	58.5056	52.687	58.2205	22.7606	24.9786	26.4855	20.9054	12.4506	14.1774	17.1143	16.6384	22.2385
'cspC'	1293.67	1377.24	1391.59	1548.85	1609.44	1474.58	1690.17	1606.35	1705.14	1245.35	1184.22	1046.97	1385.4	1383.48	1296.14	1089.28	1192.72	1388.02
'yobF'	655.137	710.375	711.229	926.118	889.944	893.256	889.94	876.443	903.855	509.585	502.838	495.811	803.023	750.257	708.103	650.609	623.598	733.134
'yebO'	83.8994	75.7301	79.7792	74.1888	79.7842	75.3331	83.9652	78.4756	84.957	42.0439	44.2115	41.7656	26.3792	25.0835	28.6489	40.3314	40.7824	32.9887
'mgrB'	21.7116	21.0118	22.0917	21.4165	22.8848	24.0608	23.7356	24.2032	27.736	33.1926	33.6274	31.8053	21.313	21.5001	19.4718	35.7543	32.8044	23.9918
'yobH'	23.2152	23.6383	25.0166	21.7715	23.8227	25.5646	25.6896	25.6301	25.3622	13.2243	12.3986	15.7328	16.1303	12.5721	13.1773	14.2619	14.0665	15.3178
'kdgR'	143.02	133.425	138.96	135.125	134.182	138.564	132.873	134.333	135.119	112.855	108.866	101.641	175.104	177.285	119.478	153.233	142.24	112.761
'yebQ'	10.0439	8.40473	7.71655	9.34755	8.12848	7.01772	8.50572	8.87805	8.55817	6.00628	6.47146	7.64005	4.48389	4.49438	4.88266	6.56712	4.4614	9.4583
'htpX'	263.667	259.408	246.556	262.441	257.86	246.551	258.735	244.78	248.562	274.972	301.558	413.016	190.303	184.877	163.187	215.985	202.337	426.5
'prc'	939.372	976.087	975.085	1049.29	1028.13	986.348	1081.49	1045.71	1102.19	354.318	354.237	410.242	259.308	274.035	343.61	331.009	310.356	536.586
'proQ'	657.302	690.764	648.688	679.295	631.02	636.966	703.791	690.057	710.203	436.245	429.354	498.414	387.652	333.616	318.844	295.653	282.118	461.519
'msrC'	496.059	477.756	478.862	460.278	497.901	488.663	486.895	466.097	494.937	199.682	201.946	223.599	215.925	191.558	232.662	210.28	199.871	272.814
'yebS'	53.3468	54.3681	52.3356	57.8602	61.1512	57.7172	60.6895	53.2154	61.344	23.1821	23.7085	23.2031	30.4555	30.8533	31.2961	39.9334	45.2963	36.08
'yebT'	171.828	180.264	177.481	185.058	192.958	185.325	199.022	194.313	204.896	58.5875	60.2995	59.0265	63.3567	69.0555	60.1803	99.2365	97.9408	70.7758
'rsmF'	59.9024	58.5705	58.5586	56.322	54.2732	51.2723	53.1033	53.9553	55.8467	21.3908	24.3133	27.8437	19.1002	18.9493	15.4127	18.7727	16.4284	20.6698
'yebV'	292.956	312.288	286.757	393.307	431.122	407.243	395.344	378.585	398.798	4.58374	5.01992	4.58403	12.4617	14.7586	17.7658	50.5469	58.0506	20.5314
'yebW'	20.9297	22.2375	16.9889	21.5349	23.7602	20.6951	20.2298	19.7114	21.5516	5.79553	5.0804	5.09337	7.51196	8.01699	7.70637	12.6036	12.7543	7.88961
'pphA'	19.0653	19.3484	19.0424	23.5464	23.8227	20.1222	21.9539	18.5488	23.4256	4.63642	5.01992	4.18788	5.53207	4.98025	5.64741	10.2819	8.03051	5.76726
'yebY'	57.4966	56.1191	56.1939	52.1806	55.8364	57.3591	57.0688	52.1585	61.8437	55.6898	53.2232	52.5183	48.2746	48.6486	51.1797	63.7475	58.838	78.4808
'yebZ'	75.4794	73.2787	69.6356	73.5972	68.1542	68.6734	77.6434	74.565	81.3339	103.108	103.543	116.638	91.25	86.1827	103.771	106.799	109.908	160.56
'yobA'	77.6445	71.7028	66.3997	75.4904	72.2184	78.7704	72.3561	72.6097	76.2114	87.0383	82.9193	101.132	99.5772	94.1389	94.0059	107.462	105.446	132.878
'holE'	39.3335	37.0333	38.9561	36.4436	36.3906	34.9454	36.4941	40.8496	37.9808	20.6005	25.1601	25.3537	26.9033	23.6866	20.1777	24.9418	19.5777	20.6698
'yobB'	65.7362	71.0024	73.1205	72.5323	79.0964	75.3331	72.8158	71.6057	70.2769	21.4435	21.1683	16.7515	33.0759	31.6428	28.2959	34.9583	33.7492	27.6367
'exoX'	115.474	116.966	109.276	96.9069	104.857	99.6087	109.195	107.276	108.383	48.7351	51.0459	53.1408	40.7626	31.825	38.826	34.693	36.8984	44.5694
'ptrB'	119.083	123.094	126.016	119.152	128.18	129.685	126.206	121.228	121.501	34.1409	38.9497	34.6349	45.0718	46.7658	52.0033	79.9331	73.7968	51.121
'yebE'	42.9421	36.6831	40.6986	45.9095	46.2073	45.9016	47.8159	41.8008	44.1027	32.5077	36.9538	38.1437	37.2687	39.4169	34.8257	56.9814	53.6942	44.8923
'yebF'	149.756	155.838	151.344	147.313	142.311	149.306	144.482	135.126	135.431	29.5045	27.8212	30.0509	80.1276	75.9792	70.1221	141.691	151.32	57.3957
'yebG'	61.7066	66.0997	63.4126	60.9366	71.1555	60.3667	68.5055	72.1341	71.9636	48.7351	56.9125	49.915	74.3626	78.4694	60.8862	67.7939	72.642	64.3626
'purT'	162.386	164.417	168.519	203.99	187.393	210.46	207.183	219.203	200.711	6.3224	7.80204	6.96094	11.0641	8.92802	6.76513	9.95018	10.025	7.05912
'eda'	300.474	305.897	309.844	352.486	334.456	330.692	342.183	338.687	320.775	317.7	320.609	310.412	265.889	259.398	248.016	262.088	284.69	233.689
'edd'	146.568	141.217	151.282	161.511	155.442	163.126	157.643	163.187	152.173	202.211	236.722	211.771	161.071	162.951	202.895	190.645	185.752	182.937
'zwf'	336.861	319.905	347.556	322.905	333.518	376.379	359.654	370.394	343.326	419.754	386.836	372.212	182.616	193.562	222.896	326.499	290.096	348.896
'yebK'	100.379	97.6174	108.903	97.3802	96.6039	109.204	109.195	102.52	105.259	243.57	252.931	211.035	263.443	260.795	247.427	264.608	265.479	237.103
'pykA'	1698.14	1582.1	1623.03	1547.2	1455.81	1669.14	1693.33	1757.96	1654.54	1458.79	1523.39	1335.99	1355.71	1422.71	1291.32	1237.14	1191.61	1250.53
'lpxM'	129.067	127.034	129.501	128.854	137.121	131.547	130	127.622	131.933	97.9445	105.479	111.318	99.6937	89.0372	89.1233	100.364	96.8386	123.465
'mepM'	135.622	145.157	145.743	163.05	163.633	162.267	171.091	161.707	169.414	166.542	165.778	187.493	155.83	146.067	172.187	148.855	141.243	249.145
'znuA'	92.1991	101.294	104.485	109.213	104.17	105.051	112.873	111.821	117.128	103.424	108.987	134.521	109.477	95.9003	95.359	78.4074	74.1642	116.268
'znuC'	48.2948	44.1248	50.4065	50.8791	41.0801	41.8915	43.6205	46.4512	45.7269	20.9693	25.5229	24.5048	40.4714	40.5101	26.1781	21.028	19.9976	17.2095
'znuB'	45.2876	47.4517	42.0054	45.4362	39.3919	40.2445	46.2642	44.0203	52.4735	21.5488	23.2851	23.8256	26.4375	25.0835	23.0015	18.1757	21.8871	21.3619
'ruvB'	118.722	117.841	121.66	120.927	103.419	115.291	114.195	117	112.943	72.7602	66.65	70.911	68.7141	69.7843	58.4154	68.5236	70.0177	79.4497
'ruvA'	58.7596	55.156	56.1317	56.2036	55.2737	60.5816	54.8849	67.6423	57.7208	41.2536	43.3043	38.8228	54.913	52.9607	43.591	46.7658	50.65	51.3516
'yobI'	0.180429	0.175099	0.248921	0	0.125054	0.214828	0.0574711	0.158537	0.0624684	0.15806	0	0	0.0582323	0	0.0588272	0	0.052487	0.046138
'yebB'	3.42815	3.15177	4.60504	2.36647	2.50107	1.71863	2.12643	2.43089	1.81158	1.36985	2.23779	1.6412	2.21283	1.70057	1.64716	2.18904	2.4144	1.75325
'ruvC'	167.137	179.388	161.363	142.343	125.304	137.777	169.022	164.825	165.104	154.635	152.17	148.613	114.951	107.926	74.24	94.8584	101.142	112.808
'yebC'	483.248	493.077	473.385	405.613	378.287	374.875	444.481	449.98	453.396	363.696	366.817	355.743	323.48	304.221	212.19	239.866	270.308	260.034
'nudB'	151.199	159.865	149.041	142.106	125.616	121.951	146.839	153.093	145.864	104.688	105.176	103.112	94.6857	88.6121	62.298	76.0194	73.6393	89.3233
'aspS'	1116.73	1120.72	1126.24	940.671	914.642	937.797	1037.47	1048.72	1071.15	585.454	608.801	633.162	652.726	623.078	484.207	506.531	496.842	583.877
'yecD'	75.4192	79.3196	78.0367	86.6128	85.2865	87.2919	87.9307	86.1382	85.4568	84.3513	84.4313	80.8148	59.8628	60.6741	85.5348	109.187	120.405	127.433
'yecE'	32.2366	32.3057	30.1194	31.9473	36.203	39.0271	36.3792	31.3374	32.2962	29.9787	29.2123	30.5036	19.6243	18.6456	27.8841	37.6117	36.216	44.8462
'yecN'	96.2888	98.7556	87.6202	94.3038	93.0399	94.0232	91.7813	85.504	85.2694	28.24	31.2081	31.1827	41.0538	38.3237	31.5314	40.9284	39.4702	38.1562
'cmoA'	72.2317	70.6522	71.1914	65.5512	63.027	62.7299	60.6895	60.6667	59.9697	21.4435	21.9546	22.9202	27.9515	23.6866	19.766	23.1508	20.4699	23.9918
'cmoB'	106.273	97.0046	102.991	95.9603	88.788	84.2127	99.8847	100.512	100.324	37.0387	35.9861	36.7288	31.3872	33.7078	29.7666	35.5553	33.5392	36.4952
'torZ'	22.8543	22.6753	22.2784	20.5883	18.8206	19.8358	19.3103	18.4959	17.9284	11.8018	11.8543	15.1669	10.54	9.53536	11.5301	18.5073	14.1715	26.2064
'torY'	2.16515	2.88913	2.42698	2.72144	2.12591	2.00506	2.12643	2.43089	1.74912	1.15911	1.02818	0.962081	1.74697	1.15396	1.23537	1.06135	1.25969	2.49145
'cutC'	244	276.831	273.564	258.537	276.744	226.787	239.597	254.504	255.496	63.4347	75.9035	82.2862	38.6662	34.8618	45.7088	57.313	60.57	90.7535
'yecM'	70.9085	69.2515	69.2622	61.2915	61.4638	56.4282	63.5055	59.3455	66.8412	40.0418	39.5545	47.1419	29.8149	26.1767	29.296	26.6001	26.9258	36.8643
'argS'	270.222	282.259	261.367	252.266	225.597	236.741	248.505	236.272	236.318	148.787	142.191	193.152	127.005	107.986	100.477	81.8568	73.3244	103.303
'yecT'	2.88686	2.18873	2.6759	2.24815	2.75118	3.07921	3.67815	2.3252	3.06095	1.42254	0.846733	1.75438	1.22288	0.911022	1.05889	1.19402	0.472383	1.43028
'flhE'	2.22529	2.27628	1.4313	2.48479	1.37559	1.57541	1.83907	2.06098	2.24886	2.63433	2.47972	1.6412	1.86343	2.18645	2.5884	2.38804	1.67958	1.66097
'flhA'	17.9226	21.2745	16.1176	17.6302	15.9443	16.0405	16.2068	17.0163	14.6176	21.0747	21.2893	16.6949	16.305	16.2162	16.001	17.3796	15.1163	20.3469
'flhB'	3.48829	2.62648	3.04928	1.89317	2.5636	2.50633	2.06896	2.11382	2.62367	7.32344	8.46733	8.60213	5.4156	4.61585	5.1768	3.11772	3.30668	8.35099
'cheZ'	8.05915	6.3911	9.08561	8.04599	8.00343	8.44991	7.81607	10.0935	10.1199	3.68806	4.95943	3.62195	4.30919	3.40115	4.35322	5.17409	5.14373	4.33698
'cheY'	6.67587	6.12845	5.22734	5.79785	5.31478	4.43978	6.60917	5.17886	5.05994	2.52896	3.02405	2.15053	2.67869	2.30792	2.70605	3.98007	2.78181	2.67601
'cheB'	3.60858	2.71403	3.60935	2.0115	3.12634	2.57794	3.44826	2.58943	2.81108	2.05478	1.51202	1.24505	1.86343	1.51837	1.52951	2.32171	1.83705	2.03007
'cheR'	2.105	2.36383	2.11583	2.72144	2.18844	2.64955	2.52873	2.11382	2.18639	1.31717	1.2701	1.92416	1.74697	0.789552	0.529445	1.79103	1.83705	1.43028
'tap'	5.59329	6.47864	6.47194	5.5612	5.94004	4.72622	5.80458	5.23171	5.9345	3.10851	2.78212	3.33899	3.31924	3.46188	2.23544	4.24541	3.56912	3.73718
'tar'	7.63815	7.87943	6.65863	4.85126	6.87795	5.51393	7.01147	6.02439	5.24735	3.68806	4.47559	4.52744	5.53207	5.28393	5.05914	4.70975	5.2487	5.12132
'cheW'	4.45058	5.77825	4.97842	4.73294	4.87709	4.36817	4.99998	4.49187	3.43576	3.42463	2.47972	2.4335	3.08631	2.18645	2.35309	3.8474	4.40891	3.13739
'cheA'	10.104	9.45532	9.08561	7.33605	6.00257	7.51899	7.01147	6.97561	6.18437	4.89986	4.83847	4.69722	4.42565	4.25144	3.64729	5.90377	4.98627	5.72112
'motB'	3.48829	3.15177	3.54712	3.07641	3.25139	3.22242	3.79309	2.9065	2.49874	2.31821	2.05635	2.03735	2.15459	1.88278	1.82364	1.99004	1.94202	2.3069
'motA'	2.947	2.80158	2.30252	2.12982	3.31392	2.2915	2.70114	2.85366	2.43627	1.63329	1.39106	1.86757	1.74697	1.88278	1.82364	1.39303	1.6271	1.9378
'flhC'	15.2763	13.2199	15.682	10.2941	10.1919	13.2477	13.1609	12.3659	10.4322	7.903	7.37867	9.11147	12.3452	12.6328	10.0006	8.09281	7.92554	8.67395
'flhD'	10.0439	10.5059	10.4547	8.28264	5.43983	7.80543	8.50572	8.45528	6.68412	5.00523	5.01992	6.56478	11.1224	9.53536	6.11803	4.57708	4.98627	5.85953
'uspC'	35.0633	32.5683	33.1065	32.5389	27.2617	33.1552	30.6896	30.9675	29.5476	45.3105	51.2273	46.5194	60.7945	61.5244	51.7091	69.7176	79.0979	81.203
'otsA'	302.278	285.673	297.896	299.832	345.711	316.8	311.436	289.541	294.226	28.1874	32.1758	24.9009	47.2264	50.6528	64.9453	150.646	138.776	62.3325
'otsB'	218.68	199.787	215.441	230.849	266.364	238.961	250.804	228.504	241.19	16.9651	16.1484	10.7527	25.7969	29.5171	41.9438	98.0424	95.6314	47.799
'araH'	30.4323	28.8913	28.6259	26.7411	34.3272	28.6438	27.4712	27.0041	27.7984	8.42986	9.4955	8.43235	12.4617	10.8108	15.0598	20.431	20.9948	14.4873
'araG'	26.3426	27.8407	26.6345	28.0427	30.388	28.3573	28.9654	27.6382	25.9869	19.8102	19.4749	18.1098	25.8551	28.0595	28.7077	33.4989	36.8459	22.8845
'araF'	6.91644	5.60315	7.59209	6.62611	5.50236	6.01519	4.94251	6.60569	5.49722	13.4878	11.1285	9.96036	23.6423	24.962	25.2957	28.9882	32.5944	19.8855
'ftnB'	87.5681	90.7886	95.4612	78.8034	82.6604	93.4503	83.7928	79.0569	74.5248	82.0331	78.0204	62.1391	174.755	179.836	146.48	203.713	198.034	143.812
'yecJ'	23.0949	23.7258	22.714	18.4585	19.7585	18.6184	24.5976	19.7642	22.6136	13.962	13.1848	18.5625	9.3754	7.59185	8.23581	10.4145	10.0775	15.4101
'azuC'	2.947	2.45138	1.86691	3.90467	2.06338	2.14828	2.47126	1.63821	3.5607	0.368806	0.362885	0.282965	0.0582323	0.242939	0.235309	1.12769	0.682331	0.599795
'yecR'	2.46586	1.83853	2.80036	1.65653	1.31306	1.71863	2.12643	2.16667	1.56171	4.47836	5.0804	4.8104	5.5903	4.61585	5.35328	2.52071	2.88679	5.49043
'ftnA'	25.8013	27.7531	28.9993	19.5234	17.3824	23.0582	19.4827	18.4959	17.9909	397.468	443.265	372.212	387.827	354.327	232.25	208.556	151.53	276.09
'yecH'	84.2602	77.2184	74.1784	63.4214	59.463	72.612	70.4595	69.5975	72.7757	44.2041	45.6026	35.597	37.4434	39.9635	47.003	59.5684	56.0037	43.7389
'tyrP'	30.4925	32.2181	27.8169	22.2448	23.0099	27.14	26.7815	27.6382	24.9249	33.3506	29.6356	29.5981	16.2468	14.5156	23.4721	16.65	17.0058	19.9778
'yecA'	232.031	203.552	217.557	248.124	246.668	249.63	256.034	275.906	262.805	98.9455	101.185	86.3609	109.302	109.383	111.183	179.966	180.975	180.861
'pgsA'	136.344	129.223	136.595	132.877	152.378	143.004	139.597	136.711	137.93	128.45	125.74	110.187	199.329	183.115	149.833	153.166	160.348	126.603
'uvrC'	382.99	363.067	389.126	435.667	425.87	436.316	459.424	458.593	471.699	184.351	173.399	165.082	175.512	180.2	152.304	179.103	163.969	191.334
'uvrY'	387.14	370.158	374.19	389.521	395.544	396.358	408.562	412.988	408.668	135.299	134.933	128.353	176.91	161.98	146.009	143.482	145.704	142.29
'yecF'	33.7402	39.3972	37.5248	26.9777	22.072	25.0633	24.5976	24.3089	26.6115	24.6047	24.5552	32.5976	35.347	29.3956	21.3543	21.8904	22.097	17.4402
'sdiA'	80.2307	79.057	87.0601	68.036	64.1525	69.3895	69.4251	62.7805	72.2135	53.4769	55.34	62.1957	77.2742	69.0555	65.9453	79.8668	80.5151	68.1459
'yecC'	147.17	131.236	135.475	143.763	137.246	132.191	145.114	144.268	147.3	29.926	27.7003	33.3899	24.9817	25.873	33.4727	46.8322	48.8654	46.461
'yecS'	85.2225	83.6971	83.6374	82.8264	86.9748	82.2792	87.8733	86.2967	83.3953	20.3897	18.991	22.2976	19.8572	20.8928	24.0603	31.1772	33.6967	28.2826
'dcyD'	195.465	184.029	187.002	194.642	183.454	185.612	189.425	187.813	184.469	45.9427	46.5703	47.2551	54.8548	55.4509	61.0038	88.0923	88.8605	77.189
'fliY'	783.783	584.479	654.351	640.603	606.76	611.616	574.308	658.349	651.733	70.4947	70.8231	63.6671	83.6216	92.074	106.889	185.471	177.354	135.83
'fliZ'	9.56273	9.89307	10.4547	9.70252	8.44112	7.73382	8.7356	6.13008	9.43273	9.90509	7.86252	10.2999	8.90954	9.41389	9.17705	8.22548	7.50564	10.2888
'fliA'	5.41286	6.56619	5.78741	4.73294	3.62655	3.43725	3.85056	4.1748	3.93551	27.6078	23.4061	25.9762	19.7407	17.2487	20.0013	10.7462	8.29295	26.9908
'fliC'	113.43	108.298	108.716	92.5289	91.2891	96.6011	91.9537	94.065	98.5127	35.3527	35.8652	34.5217	52.4673	48.3449	44.4146	54.925	57.7357	49.137
'fliD'	8.05915	9.63042	6.84533	8.40096	6.12762	6.94611	5.63217	7.39837	7.1214	4.68911	4.89895	4.24447	4.19272	4.55511	4.23556	3.8474	2.93927	5.67498
'fliS'	2.46586	1.05059	2.0536	1.77485	1.50064	1.79024	1.49425	1.42683	1.56171	1.26448	0.786252	1.01867	1.22288	0.971757	0.941236	0.663345	0.997253	1.24573
'fliT'	1.20286	1.92608	1.74245	0.946587	1.43812	1.64702	0.977008	1.26829	1.43677	0.684926	0.483847	0.679116	0.640555	0.728818	0.941236	0.72968	0.577357	1.24573
'amyA'	420.7	402.026	427.771	458.267	501.715	510.862	479.481	443.268	437.841	24.4993	21.7126	20.3169	47.8669	43.4254	55.1211	145.803	140.455	49.5523
'yedD'	194.382	202.151	179.659	161.275	165.258	164.272	177.356	175.024	173.287	115.594	117.817	118.675	97.3062	101.184	94.7707	93.2	103.609	116.499
'yedE'	37.469	34.3193	36.218	17.8668	19.7585	20.4803	21.3218	22.565	23.3007	103.687	72.4561	71.194	187.042	145.703	68.1808	30.8456	30.1276	29.3438
'yedF'	6.61572	4.55256	5.3518	5.08791	3.75161	3.93852	4.31033	3.91057	3.37329	12.3287	9.31406	11.0356	27.6603	24.051	9.05939	6.50078	6.4559	4.29084
'yedK'	14.4343	12.8697	13.1928	11.4774	14.7563	15.3244	12.3563	11.5732	12.8685	2.42359	2.23779	2.49009	4.30919	3.58335	3.64729	8.42449	7.45316	3.41422
'yedL'	7.33744	6.12845	7.34317	5.91617	7.37816	5.15588	6.83906	6.71138	4.99747	1.79135	1.02818	1.24505	1.74697	2.49013	1.9413	3.91374	2.4144	1.56869
'fliE'	2.28543	3.93972	1.80468	1.89317	2.43854	1.5038	2.29884	2.00813	1.3743	6.53314	4.47559	5.99886	3.7851	2.91527	4.05908	1.85737	1.94202	4.15242
'fliF'	6.97658	6.56619	8.21439	3.5497	5.06467	4.43978	6.32182	4.96748	4.935	46.9438	46.026	50.2546	34.8811	31.4606	37.6494	23.7478	21.2572	55.4118
'fliG'	6.67587	6.30355	5.3518	5.67952	4.50193	3.72369	7.01147	5.17886	4.37279	20.4951	21.5917	19.468	16.8874	16.8235	18.1188	11.4759	12.072	23.6227
'fliH'	3.60858	3.67707	4.04496	4.49629	2.75118	2.64955	3.21838	3.32927	3.99798	17.0178	16.6927	12.1109	11.4135	10.9323	12.3537	8.02648	10.6549	16.3329
'fliI'	4.02958	4.55256	3.79604	3.66803	3.56403	2.72116	3.73562	3.75203	3.68564	15.1211	15.0597	14.6576	12.287	11.8433	15.0598	11.8739	9.39518	24.7761
'fliJ'	0.721715	0.700394	0.684533	0.828264	1.00043	1.00253	0.574711	0.634146	0.562216	2.89777	2.8426	1.81098	1.8052	2.36866	2.70605	2.71972	2.04699	4.2447
'fliK'	4.93172	4.99031	5.66295	5.44288	5.00214	4.08174	4.71263	4.86179	3.99798	10.3793	9.4955	8.8285	9.14247	6.07348	7.7652	8.42449	7.97803	12.9648
'fliL'	2.82672	3.06422	2.92482	3.5497	2.87623	2.64955	2.87355	3.11789	2.43627	18.0188	20.503	20.4301	16.1886	12.8758	16.7658	10.0165	7.40067	20.9928
'fliM'	6.85629	7.70433	5.9741	5.91617	6.12762	7.16094	6.09193	6.39431	5.18488	26.9756	27.8212	27.674	21.313	19.8603	20.9425	13.7312	13.3317	30.3588
'fliN'	0.601429	1.31324	1.86691	1.06491	1.56317	1.21736	1.66666	1.32114	1.1869	8.85136	8.34636	6.22523	5.29914	7.28818	6.29451	5.24043	4.72383	9.0892
'fliO'	0.421001	1.05059	0.933453	0.35497	0.875375	0.859313	0.632182	0.369919	0.812089	3.42463	2.5402	2.32031	2.32929	1.82204	3.00019	1.26036	1.2072	3.55263
'fliP'	2.64629	2.27628	1.80468	2.0115	1.75075	2.2915	1.72413	2.16667	2.12393	4.84717	5.01992	3.96151	3.37747	3.09747	3.52963	3.38306	2.93927	5.49043
'fliQ'	0.240572	1.40079	0.808993	0.591617	0.312634	0.930922	0.459769	1.05691	0.562216	1.05373	0.967694	1.18845	1.10641	0.728818	1.11772	0.530676	0.629844	1.56869
'fliR'	3.12743	3.32687	2.30252	2.95809	2.12591	2.72116	2.87355	3.01219	2.99848	2.16015	1.75395	1.86757	1.51404	1.3969	2.00013	1.85737	2.15197	2.03007
'rcsA'	7.21715	6.3911	5.78741	5.08791	5.81499	6.30163	5.97699	6.60569	5.18488	2.84508	3.32645	3.56536	2.56222	2.30792	3.05902	3.31673	3.46414	2.95284
'dsrB'	46.3101	41.9361	46.6727	52.1806	57.1495	52.4897	49.4826	51.6301	49.6624	28.082	30.2405	26.0894	27.1362	27.2699	32.7668	51.4756	41.9371	41.0629
'yodD'	74.5772	75.2924	74.1784	89.2159	93.0399	89.5118	81.2066	83.2317	74.8371	4.68911	3.74982	4.58403	12.1123	12.2077	16.354	47.2965	49.6527	15.3178
'yedP'	87.087	79.7574	87.4335	93.4755	104.295	100.253	82.6434	83.2317	80.022	6.84926	7.62059	6.4516	15.1404	16.3377	17.4717	47.8935	49.5477	15.7792
'yedQ'	92.3194	80.4578	92.6608	92.7656	103.982	101.829	100.23	97.3943	94.7021	26.0272	28.2446	24.2784	32.6683	32.5539	34.2963	53.532	49.5477	39.1251
'yodC'	27.8462	17.3348	25.0166	26.2678	32.8891	30.434	31.7815	34.2439	29.2977	6.05896	4.95943	3.50876	3.66863	3.94776	7.70637	13.2006	10.6024	9.64285
'yedI'	101.642	74.1542	91.4784	77.1469	93.8527	83.6398	98.6204	98.187	95.0144	39.1462	35.5023	31.6355	25.0399	28.4239	37.6494	45.6382	41.3598	51.2132
'yedA'	4.57086	4.55256	3.48489	3.5497	5.75246	5.80036	5.74711	5.9187	6.68412	4.37299	5.14088	4.75381	2.27106	2.42939	4.35322	3.98007	3.72658	5.67498
'vsr'	8.29972	11.0312	10.5169	11.2407	8.12848	9.23762	11.2643	10.3577	10.7446	7.53419	7.80204	8.0362	4.54212	3.82629	5.58859	4.51075	4.4614	6.04408
'dcm'	122.391	121.781	121.287	112.762	119.239	125.245	127.069	125.931	124	87.7759	84.4918	91.4542	61.9592	61.5244	60.945	53.2666	53.3793	62.7016
'yedJ'	83.5385	72.4032	78.8457	74.5438	77.5957	72.5403	82.1836	77.8943	79.7721	20.2844	20.503	22.8636	13.5099	13.1187	13.9421	17.5787	13.6991	23.069
'yedR'	47.4528	42.9867	42.1299	44.1346	43.6437	43.1089	40.2298	38.313	41.7914	1.94941	1.33058	1.86757	1.68874	2.24719	1.41185	2.71972	2.30943	1.66097
'hchA'	423.406	387.931	405.741	393.425	434.749	430.731	363.734	348.886	337.829	106.111	81.7702	108.432	126.655	124.628	108.654	422.617	383.995	63.3937
'yedV'	29.1693	29.7667	30.9907	26.8594	25.5735	26.9251	28.5631	29.2236	32.4211	15.4899	15.725	18.6191	23.2929	20.2247	21.6484	22.4211	19.2102	14.6258
'yedW'	28.0867	25.827	27.8169	24.9662	25.636	24.204	24.8275	25.7358	26.674	16.9651	13.3663	15.5631	27.4856	22.2289	18.2953	22.3547	21.0998	16.5174
'hiuH'	10.4047	10.0682	10.9525	10.5308	10.8797	12.5316	9.36778	8.71951	8.62064	4.16224	4.71751	4.69722	7.80313	8.32067	5.52976	20.4974	17.5832	10.012
'yedY'	60.8646	61.1969	62.168	58.3335	60.4009	55.7121	55.1722	58.2886	53.7228	11.3276	10.3422	10.2999	21.7206	21.986	20.766	36.2187	42.8294	16.7942
'yedZ'	21.892	22.5002	21.5939	23.0731	23.4475	18.9765	21.4942	19.1829	20.9269	4.79448	5.0804	4.98018	5.4156	8.1992	6.58865	11.3432	12.2295	6.69002
'zinT'	5.71358	5.3405	6.5964	4.96958	5.75246	5.94358	5.40228	5.76016	5.37228	5.05792	3.02405	6.84775	5.64853	5.83054	6.58865	3.78107	4.09399	4.79836
'yodB'	9.32215	10.4184	10.3302	7.80935	9.75418	12.46	11.3218	9.51219	9.4952	2.73971	2.78212	3.56536	4.25096	4.85878	3.17667	4.57708	4.0415	3.2758
'mtfA'	111.806	114.865	122.718	100.812	109.172	117.583	113.218	111.663	106.384	142.307	136.263	102.886	329.187	316.125	234.309	345.47	345.155	222.385
'yeeJ'	92.139	97.0046	93.9054	96.4336	97.9169	100.969	96.6663	97.1829	96.5761	44.1514	49.2919	44.0293	52.2926	52.5356	44.4734	67.7276	59.5728	55.5963
'shiA'	328.32	307.561	334.923	361.005	392.856	421.207	412.7	408.496	424.098	54.7941	53.2232	52.971	61.3186	60.0667	67.5925	66.7325	64.4016	76.9121
'amn'	218.078	213.007	212.267	223.395	214.529	227.646	218.735	217.512	219.826	146.153	158.581	168.025	178.89	173.276	169.364	252.403	232.308	234.197
'yeeN'	235.52	236.471	256.326	237.12	232.287	266.315	249.654	258.732	258.494	216.384	225.594	234.182	210.51	218.159	203.072	280.529	247.896	242.409
'yeeO'	48.8962	42.2863	46.2371	47.3294	60.3383	56.0702	51.8964	52.5284	56.7838	11.1169	10.4027	10.0735	14.6163	15.8518	15.8245	21.1607	18.6329	12.3189
'cbl'	40.6566	34.4944	28.6881	29.9358	28.5122	30.1476	25.747	22.565	27.0488	7.69225	6.89482	8.71532	8.21075	7.04524	7.7652	6.56712	7.13823	8.4894
'nac'	12.3293	13.0448	11.9482	10.1758	11.5049	12.3884	11.6666	10.8333	11.869	3.79344	3.26597	3.39558	4.60035	4.1907	4.41204	5.43943	4.67134	3.8756
'ldtA'	129.969	122.306	123.465	129.091	125.679	128.754	118.505	115.837	115.567	31.0324	27.035	26.146	60.3869	60.1275	61.5921	133.399	135.521	66.4388
'cobT'	33.4395	28.2784	30.3684	26.7411	28.8874	33.0836	27.5286	31.1789	29.9848	26.2379	20.4425	18.1098	19.4496	20.8928	19.4718	25.6051	21.4672	21.3619
'cobS'	13.1112	10.0682	12.0727	11.2407	11.1923	12.102	11.8965	15.6951	12.4312	11.1696	6.77386	7.41368	8.26898	8.25993	8.76526	10.8125	9.39518	8.62782
'cobU'	24.2376	18.9982	22.2162	15.737	17.8827	19.4778	19.0804	22.4065	20.802	15.1738	14.8178	12.6202	17.4115	16.034	20.766	18.5737	17.8981	15.0871
'flu'	182.534	169.933	173	240.788	221.532	228.864	927.066	931.666	849.133	158.798	143.34	122.014	3401.7	3528.45	2912.24	2852.98	3071.28	2244.48
'yeeR'	14.5546	15.4962	11.2637	13.7255	15.5692	14.6799	34.1953	34.9309	33.7329	9.0621	7.62059	6.67797	76.4008	73.2462	55.0035	66.0029	66.2386	71.5601
'yeeS'	4.45058	5.42805	3.79604	2.95809	3.87666	3.15081	7.3563	7.0813	6.74659	2.84508	3.20549	2.65987	9.3754	9.04949	7.70637	9.0215	11.9146	10.3349
'yeeT'	1.92457	2.88913	2.98705	2.12982	2.68865	1.86184	1.95402	2.74797	2.43627	1.73866	1.63298	1.41482	1.92167	2.00425	1.41185	1.26036	1.99451	1.56869
'cbeA'	3.72886	3.15177	4.23166	4.96958	4.62698	2.79277	5.34481	3.54065	2.87355	2.3709	1.99587	2.03735	2.09636	1.94351	1.9413	1.39303	3.35917	2.9067
'cbtA'	3.00715	3.58952	3.67158	4.023	3.87666	4.86944	3.90803	4.01626	4.62266	3.1612	2.29827	2.71646	2.67869	2.67233	2.70605	2.18904	3.41166	1.84552
'yeeX'	857.398	863.586	844.9	819.271	771.831	851.508	786.377	805.154	765.987	348.838	391.13	370.627	430.628	463.71	413.438	511.174	475.585	322.782
'yeeA'	89.7333	83.6095	90.2338	93.2389	89.976	85.7881	86.7813	84.7642	86.2689	24.8681	25.5834	20.2037	26.9615	32.7968	27.4723	40.5967	38.8404	27.9135
'sbmC'	120.286	104.972	111.454	102.113	128.555	121.879	120.229	109.76	107.071	39.1462	37.5586	26.4289	61.2021	64.0145	60.945	98.0424	99.3579	67.5461
'dacD'	28.3273	24.4262	30.555	25.9128	33.0141	27.7845	26.7815	29.4878	31.9838	13.6458	11.4309	11.8279	12.8693	12.7543	12.7067	16.1193	15.0113	16.056
'sbcB'	121.128	119.417	120.664	117.732	121.615	125.46	123.103	124.028	131.059	120.284	113.341	105.093	151.462	151.412	119.066	139.17	134.577	115.437
'yeeD'	143.621	124.933	128.817	107.438	87.8501	70.1056	91.2066	113.724	122.688	7.95568	7.98348	7.30049	7.68666	5.70907	5.70624	7.16413	7.76808	7.33595
'yeeE'	315.871	235.77	245.996	195.234	167.822	148.088	152.586	204.037	218.14	3.79344	4.77799	2.99943	3.20278	3.46188	3.52963	3.6484	4.30394	4.8445
'plaP'	101.341	98.2303	94.9011	97.1435	72.0934	88.0796	84.0227	78.1057	86.4563	44.0987	53.0418	67.1759	38.8992	35.955	25.2957	36.6167	39.5227	53.0126
'yoeI'	3.54843	4.37746	3.85827	4.14132	3.25139	4.43978	3.39079	2.58943	2.93601	2.00209	1.33058	2.94283	1.33934	1.51837	1.52951	1.9237	1.99451	2.12235
'yeeY'	35.7249	35.4574	34.4133	39.4017	40.8925	36.664	38.9079	37.0976	40.9793	12.0126	13.1244	10.0735	15.6063	15.6088	15.1186	22.7527	23.9341	18.1784
'yeeZ'	368.556	371.559	360.064	349.291	371.159	353.034	381.263	384.398	376.997	177.554	176.423	174.08	197	206.802	186.365	240.728	241.335	241.81
'yoeB'	12.6902	12.0818	12.695	12.7789	9.87923	9.73888	11.0344	11.8902	9.6826	6.05896	6.10857	6.73456	10.3653	8.68508	8.35347	9.81751	9.65761	7.24367
'yefM'	21.7116	27.1403	21.8428	23.0731	20.1336	20.7667	21.7241	21.1382	20.6146	13.1717	12.5195	12.3373	14.4998	15.0622	11.8831	16.5173	18.5279	15.2256
'hisL'	14.4343	17.1597	15.3709	15.1454	11.2548	11.4575	12.0115	11.6789	12.931	3.47732	3.20549	3.62195	5.765	4.73731	5.52976	5.17409	5.19622	4.8445
'hisG'	212.906	204.515	202.995	127.553	123.49	132.191	137.471	145.589	141.928	37.7763	36.2281	38.936	34.2406	36.2587	42.3556	41.6581	36.6884	45.5383
'hisD'	285.077	292.152	266.594	183.401	172.636	178.737	197.528	211.329	191.716	58.3241	55.6424	52.0655	37.7928	45.5511	49.7678	54.328	51.3848	65.0546
'hisC'	235.82	246.276	235.168	159.618	159.693	150.881	167.068	175.553	177.473	49.262	44.9978	47.1419	29.4655	29.2742	34.8257	40.5967	38.3155	46.8301
'hisB'	243.94	249.515	234.732	163.996	156.129	158.114	169.597	182.158	174.099	66.4905	67.8596	61.7995	54.7383	56.2404	56.6506	64.0128	63.8767	58.5492
'hisH'	122.752	127.209	116.495	87.086	80.9722	80.9903	91.379	95.1219	92.5157	33.0345	29.3937	28.6926	23.9335	24.6583	25.531	29.4525	28.448	27.5444
'hisA'	176.159	178.338	173.871	129.091	121.74	123.097	142.586	148.232	135.119	43.045	39.4336	41.1997	35.9293	33.5863	36.2964	46.5005	37.0034	38.9867
'hisF'	172.55	169.758	166.03	124.476	120.552	117.439	144.252	140.146	142.116	46.3642	45.9655	39.4453	27.9515	31.2784	30.9431	39.3364	37.9481	34.3728
'hisI'	211.282	242.949	220.295	169.203	165.508	156.538	189.08	179.78	171.913	60.5896	63.0211	55.5177	40.0638	45.794	44.591	62.6861	59.3628	55.0427
'wzzB'	382.268	360.003	382.716	375.085	374.598	393.422	397.412	379.536	413.291	190.62	182.108	221.392	169.98	146.735	156.363	112.835	105.027	199.224
'ugd'	22.9746	22.5002	23.9586	25.5579	27.6994	30.0043	27.4137	25.3658	26.1743	11.8545	13.0639	12.3939	22.0118	20.1032	15.2363	13.2669	15.3262	19.4703
'gnd'	1856.37	1841.69	1941.77	2146.03	2009.3	2218.75	2050.63	2184.69	2051.21	1357.58	1323.32	1369.49	1300.85	1221.26	1027.42	1389.11	1170.46	1439.05
'wbbK'	91.4173	79.5823	98.5727	75.6087	99.4801	102.401	90.5169	80.9065	93.0779	76.501	81.8307	89.6433	119.784	120.133	69.8279	99.7008	94.949	88.3082
'wbbJ'	60.6241	60.8467	67.3331	60.345	63.9649	62.8731	57.7584	58.5528	64.0926	53.6877	55.7634	55.1781	88.6295	73.3069	45.5911	60.4308	60.2026	54.8581
'wbbI'	111.986	104.972	130.248	96.0786	104.232	113.859	98.0457	102.203	106.196	86.8803	92.1124	99.1509	156.121	133.799	89.888	114.825	114.527	87.2009
'wbbH'	59.9024	53.5801	70.818	50.2875	56.7118	69.8908	59.5975	66.4268	69.3399	44.6783	40.5222	35.2574	44.7224	51.5638	45.0028	69.1869	70.2276	41.0629
'glf'	175.136	142.618	204.737	143.645	158.193	175.371	156.839	162.711	174.474	134.562	113.583	97.6229	201.134	203.219	158.834	213.266	199.976	109.209
'wzxB'	81.7342	78.3566	91.4162	67.7993	78.7212	83.4966	75.9768	74.4593	82.958	86.3007	78.9881	83.1351	126.248	115.396	63.4158	102.155	88.0732	69.9453
'rfbC'	47.3926	47.1015	49.0374	42.4781	46.5199	48.4796	43.5631	44.4431	46.9138	54.0038	50.0782	48.2172	71.451	60.3704	32.0608	43.3828	37.5282	40.7399
'rfbA'	201.118	189.194	190.736	168.374	181.578	177.591	180.057	168.683	190.466	166.648	164.629	167.628	249.176	214.09	115.125	167.296	143.919	134.862
'rfbD'	141.697	147.345	146.117	126.369	133.432	125.03	137.069	133.752	142.928	121.127	112.132	142.558	119.143	106.65	84.2406	90.6793	79.0455	109.393
'rfbB'	214.169	199.787	219.424	175.474	182.453	193.274	191.551	180.098	202.023	126.29	118.119	165.195	147.444	133.799	115.772	110.049	87.4434	130.386
'wcaN'	706.439	702.408	703.139	744.964	745.382	739.51	767.526	730.748	763.176	268.913	265.39	303.055	302.167	265.472	255.251	236.549	225.747	271.061
'wcaM'	22.1927	22.2375	20.2871	19.8783	22.3221	22.7718	22.9884	20.9268	23.3632	9.00942	7.62059	9.62081	11.2388	10.9323	11.1183	10.0165	8.76533	8.62782
'wcaL'	9.98373	10.7686	12.2594	9.82085	10.9422	8.73635	10.862	13	11.3068	5.84822	7.19723	7.13071	3.9598	5.28393	5.35328	6.83246	6.19347	5.85953
'wcaK'	6.97658	7.96698	7.84101	6.86276	6.75289	6.44485	6.09193	6.65853	6.99646	4.79448	4.1127	4.13129	3.55217	4.0085	4.11791	4.04641	4.51388	3.41422
'wzxC'	4.81143	5.42805	4.35612	4.25964	4.4394	4.94105	5.28734	4.7561	5.30981	3.10851	3.8103	4.867	2.85338	2.24719	2.52957	2.98505	2.72933	3.46035
'wcaJ'	3.00715	3.76462	3.11151	4.25964	2.93876	2.2915	2.87355	3.27642	2.68614	2.52896	1.87491	3.11261	1.6305	1.70057	1.17654	1.85737	2.04699	1.15345
'cpsG'	5.29258	5.6907	5.84964	4.49629	3.87666	4.29657	4.88504	2.69512	3.5607	3.21388	3.44741	4.41425	1.74697	1.82204	1.70599	3.05139	3.56912	1.338
'cpsB'	6.19472	5.25296	5.78741	5.67952	5.43983	4.79783	5.05745	6.34146	5.80956	3.68806	3.68934	4.24447	3.08631	2.55086	2.64723	2.71972	3.20171	1.84552
'wcaI'	4.75129	3.76462	3.54712	3.78635	4.06424	3.07921	3.33332	2.11382	2.87355	3.58269	2.96356	2.60328	0.873484	1.82204	1.2942	1.9237	1.94202	1.70711
'wcaH'	1.98472	1.40079	1.49353	0.473294	1.12548	1.28897	1.60919	1.95528	1.06196	2.84508	1.81443	2.65987	1.33934	0.789552	0.882409	0.796014	0.839792	1.10731
'wcaG'	3.06729	2.36383	3.36043	2.95809	2.25096	2.93599	3.16091	2.80081	2.43627	5.63747	5.3828	5.54611	1.9799	1.70057	2.11778	1.9237	2.36192	1.79938
'gmd'	4.75129	6.91639	4.48058	5.67952	4.62698	3.72369	4.48274	5.76016	4.56019	9.11479	7.49963	8.60213	3.4357	2.36866	3.17667	3.98007	3.72658	2.44532
'wcaF'	0.661572	0.525296	0.373381	0.828264	0.375161	0.214828	0.574711	0.581301	0.37481	0.526866	0.846733	0.679116	0.407626	0.182204	0.0588272	0.265338	0.367409	0.23069
'wcaE'	0.661572	0.612845	0.248921	0.35497	0.375161	0.716094	0.344826	0.422764	0.312342	0.7903	0.66529	0.735709	0.174697	0.242939	0.352963	0.265338	0.209948	0.046138
'wcaD'	1.62386	0.963042	1.74245	0.828264	1.50064	1.71863	1.43678	1.00406	1.12443	0.737613	1.2701	1.13186	0.582323	0.607348	0.411791	0.928683	0.577357	0.415242
'wcaC'	3.42815	2.18873	2.61367	3.31306	2.12591	2.43472	2.64367	2.58943	2.12393	2.21284	2.17731	2.3769	1.92167	1.15396	1.70599	2.32171	2.04699	1.61483
'wcaB'	1.02243	1.13814	0.995684	1.06491	0.687795	0.716094	1.60919	1.1626	1.68665	1.00105	1.14914	1.01867	0.989949	0.789552	0.588272	0.928683	0.734818	0.738209
'wcaA'	2.34557	1.13814	2.0536	1.89317	1.93833	1.43219	1.49425	1.7439	1.49924	2.58165	1.63298	2.82965	1.28111	0.789552	1.00006	1.7247	1.52212	1.19959
'wzc'	4.93172	4.11481	4.16943	4.37797	4.06424	4.43978	3.79309	4.70325	3.49823	4.84717	4.53607	5.43293	2.73692	2.91527	2.94136	4.37808	3.30668	3.59877
'wzb'	0.360858	0.612845	0.435612	0.591617	0.687795	0.358047	0.344826	0.211382	0.437279	0.47418	0.241924	0.396151	0.116465	0.303674	0.294136	0.199004	0.157461	0.276828
'wza'	1.62386	0.875493	0.995684	1.06491	0.687795	0.716094	1.49425	1.10976	0.937026	1.73866	2.11683	1.86757	0.407626	0.668083	0.294136	1.06135	0.734818	0.784347
'yegH'	108.197	108.649	108.094	106.018	98.1045	99.4655	108.793	101.939	109.757	68.598	70.8836	68.4209	60.8527	66.3831	66.5336	109.784	103.609	80.1879
'asmA'	196.728	199.175	202.248	201.032	187.58	190.051	195.459	194.683	189.904	154.214	158.339	148.67	179.064	181.354	176.364	205.637	205.749	187.505
'dcd'	230.588	254.506	233.363	236.41	206.839	209.458	230.402	236.589	222.825	201.526	200.494	182.06	231.823	228.484	211.896	232.171	240.128	217.956
'udk'	75.2388	84.1348	85.8155	92.174	77.4082	89.0821	85.6319	85.7154	90.1419	29.768	30.2405	35.597	39.7727	31.157	30.1784	26.2021	26.2435	29.4822
'yegE'	75.2989	71.8779	66.773	82.9447	76.1576	83.1385	92.4135	84.3414	91.5787	38.7247	37.1353	34.069	69.9952	67.3549	59.1214	78.9381	86.9185	64.8701
'alkA'	42.5211	41.0606	34.2266	41.1766	47.4578	38.8123	47.1263	46.874	43.7279	17.8081	17.5999	14.4312	18.9255	20.5284	18.4718	24.5438	26.401	24.8223
'yegD'	38.0103	37.2084	33.2309	24.6113	21.2591	22.4854	24.9999	25.6829	25.737	13.0663	14.2735	18.0532	11.0641	10.9323	9.9418	10.2155	10.1825	13.2416
'yegI'	20.1479	19.2608	16.6155	16.6836	15.194	15.6825	14.885	13.9512	15.9294	8.90404	10.5842	8.71532	13.5681	14.0297	13.3538	13.9966	12.4394	9.96582
'yegJ'	2.82672	2.62648	3.42266	2.12982	1.75075	2.86438	1.60919	2.58943	2.62367	0.895673	0.362885	0.679116	1.33934	1.15396	1.35303	1.06135	1.25969	0.784347
'yegK'	1.74414	1.31324	1.80468	1.65653	1.93833	1.79024	2.47126	1.1626	1.81158	0.579553	0.907214	1.13186	0.698787	0.728818	1.2942	1.39303	0.629844	1.29187
'yegL'	3.90929	4.37746	3.23597	2.60312	4.37687	3.86691	3.27585	4.43902	3.99798	2.63433	2.90308	2.20713	1.8052	1.5791	1.9413	3.25039	2.20445	2.58373
'ibsA'	8.84101	9.80552	10.0191	8.40096	7.75332	6.44485	8.85055	6.55284	8.4957	9.58897	9.91887	8.77191	14.1504	15.0622	12.8243	15.7213	17.1108	12.042
'ibsB'	5.23243	6.30355	5.16511	4.25964	5.3773	4.79783	5.11493	4.1748	5.37228	3.42463	3.8103	2.88624	4.30919	4.06923	3.94143	4.77609	4.25145	3.73718
'mdtA'	37.5292	36.7707	35.6579	35.2604	36.8283	40.2445	36.9539	36.5691	33.2957	16.9651	14.3945	13.8653	15.548	13.7868	16.5893	23.0844	22.1495	16.6558
'mdtB'	54.1286	56.2066	56.0072	58.9251	58.7127	58.8629	57.9883	56.1219	54.9097	29.6626	28.9099	28.1833	23.8752	23.5044	23.7662	36.484	38.0006	27.406
'mdtC'	44.6261	42.4614	43.0011	55.1387	50.6467	45.4004	48.3332	45.3943	48.8503	24.552	25.0391	22.7504	23.7588	20.8928	21.0013	39.6017	43.1443	26.9446
'mdtD'	14.4343	14.3581	14.0018	17.0386	18.1953	15.038	16.0344	15.9593	15.6796	7.63956	6.16905	5.82908	6.28909	6.68083	7.3534	12.7362	14.3814	7.38209
'baeS'	20.0276	18.9982	19.9137	22.9547	22.197	19.7642	21.2643	21.8252	20.9894	9.69434	7.19723	8.0362	8.44368	8.62434	6.88279	13.9303	12.4394	8.72009
'baeR'	65.4957	68.1133	69.9468	68.9826	67.5915	69.1747	74.8848	76.4675	75.6492	41.2536	40.6432	40.3508	38.4915	33.4041	34.5316	48.0262	41.6222	44.5232
'yegP'	150.237	142.355	156.758	187.543	177.951	193.703	147.241	143.158	130.122	3.58269	2.05635	2.15053	9.84126	10.6286	9.58884	32.9683	39.3653	7.28981
'yegQ'	122.15	110.4	113.197	91.819	92.227	92.0181	96.4365	82.6504	97.0759	36.0903	38.6473	45.2744	35.2888	36.3194	24.3545	26.3348	26.296	30.405
'ogrK'	9.14173	7.70433	9.2723	10.2941	10.3794	12.5316	9.08043	8.8252	6.49671	9.8524	8.58829	7.52687	17.3532	17.9168	12.4125	14.8589	13.0693	7.75119
'yegR'	2.22529	1.75099	2.30252	1.89317	1.81328	1.86184	2.41379	1.7439	0.812089	1.05373	0.362885	0.452744	1.22288	0.728818	0.764754	1.32669	0.997253	0.738209
'yegS'	128.225	123.795	133.795	131.102	141.811	141.787	137.126	130.106	129.872	7.16538	5.3828	5.77248	13.8011	11.4789	17.6482	32.1722	31.0723	12.042
'gatD'	563.118	465.412	618.568	839.505	954.284	1140.59	1258.56	944.878	987.875	2464.58	2506.03	2099.15	2833.12	2857.39	2894.18	2870.69	2852.83	2835.46
'gatC'	1521.92	1419.35	1685.32	2226.85	2417.66	2698.53	3114.36	2480.78	2432.39	5455.39	5273.63	4378.03	7317.12	7537.55	7115.21	6563.6	7310.92	6103.42
'gatB'	179.467	163.017	204.551	235.819	279.182	315.368	341.78	273.898	289.666	691.459	684.583	551.102	921.526	960.157	958.531	850.475	899.208	729.073
'gatA'	488.541	487.912	638.233	694.559	750.947	898.555	932.928	792.154	767.924	1694.56	1574.8	1365.48	2139.34	2057.57	1964.12	1883.97	1840.93	1849.35
'gatZ'	2883.67	2721.47	3351.1	3525.68	3898.23	4136.66	4842.8	4096.48	4096.12	7459.01	7315.53	6173.95	9202.62	9538.83	9452.24	8724.72	9045.77	8754.65
'gatY'	2574.96	2515.38	2995.76	2824.97	3009.04	3403.45	3718.95	3330.06	3116.86	5988.52	5833.99	5169.88	7475.57	7858.66	8003.15	7441.74	7168.47	6893.02
'fbaB'	1030.73	973.022	1021.76	1165.01	1315.69	1223.09	1219.71	1145.9	1129.8	45.4159	44.1511	30.8998	98.8784	106.59	120.596	353.032	356.387	99.6582
'yegT'	8.60044	10.3308	9.2723	6.98108	7.75332	7.30416	8.33331	7.55691	7.18387	9.95777	9.67694	9.56421	7.68666	8.68508	10.0006	8.55715	7.34818	10.9809
'yegU'	19.6667	20.9243	19.4158	16.2103	14.8188	15.2528	15.977	18.4959	18.7405	24.6047	20.745	25.6366	14.9657	16.1555	17.354	13.8639	12.1245	22.8845
'yegV'	17.7422	14.7083	19.1669	15.382	12.7555	17.2579	17.6436	17.0691	15.5546	21.022	19.8982	24.052	12.9858	13.6653	16.5893	13.0679	13.1218	22.4231
'yegW'	28.0867	24.076	28.2525	25.5579	23.3225	26.7103	26.5516	28.6423	28.0483	22.7079	27.2769	24.7311	29.2326	30.003	26.1781	27.3298	28.3955	31.0509
'yegX'	14.8553	14.3581	16.1799	14.5538	12.5679	13.6774	16.3218	13.2642	15.4922	7.95568	6.29001	6.4516	8.61838	8.74581	7.29458	6.63345	8.87031	7.88961
'thiD'	80.8922	76.7807	79.0324	68.5093	64.7777	64.0904	71.8388	68.9634	67.0911	9.16748	8.10444	9.22465	6.98787	7.34891	6.76513	7.89381	7.24321	6.41319
'thiM'	78.4865	63.3857	67.6443	68.036	57.2745	62.2286	59.5975	62.8333	63.5928	7.16538	7.923	8.8285	7.3955	6.07348	6.29451	8.02648	5.35368	8.1203
'rcnR'	12.5097	12.9573	15.0597	10.4125	13.3182	12.6033	13.2183	11.8902	14.0554	18.4403	15.5436	16.8647	16.4215	15.3052	16.7658	15.9866	15.4837	17.9016
'rcnA'	12.0286	10.7686	10.3302	12.1873	9.81671	12.3884	9.88502	10.3049	10.4947	5.47941	4.53607	6.16863	4.71682	3.70482	4.11791	4.77609	3.56912	4.47539
'rcnB'	76.8025	80.8955	75.6097	84.6013	80.3469	83.0669	77.5859	69.0162	72.151	82.718	89.8746	92.6993	63.7061	53.9325	66.0042	103.018	83.4544	107.548
'yehA'	1.50357	1.13814	2.0536	1.18323	1.00043	1.21736	1.20689	1.10976	1.74912	1.00105	1.33058	1.01867	1.33934	1.09323	1.52951	1.06135	0.944766	1.10731
'yehB'	7.27729	6.30355	7.28094	5.08791	5.25225	4.43978	5.11493	5.81301	4.7476	6.26971	7.43915	5.6027	6.05616	6.8023	11.4125	9.08783	10.5499	14.2105
'yehC'	0.781858	0.963042	0.995684	0.118323	0.375161	0.644485	0.402298	0.528455	0.499747	2.3709	1.87491	2.65987	2.03813	2.85454	3.52963	3.91374	4.67134	4.06015
'yehD'	7.45772	6.30355	7.90324	3.90467	3.43897	5.58553	5.74711	6.97561	4.99747	23.4456	27.1559	21.1092	28.0097	34.4366	30.3549	34.9583	37.8431	29.9897
'yehE'	115.354	113.289	121.224	121.991	120.364	127.25	103.678	98.874	92.2034	5.1106	4.05222	5.09337	12.9276	14.2727	16.354	33.5653	28.7629	11.1193
'mrp'	163.829	136.314	154.518	145.893	154.754	162.911	162.93	176.821	160.294	327.553	298.836	271.42	330.934	356.331	284.841	432.435	385.465	341.606
'metG'	539.723	569.42	559.45	503.23	486.271	480.213	493.389	483.431	509.055	299.049	284.018	376.117	248.594	230.124	225.544	170.347	134.314	254.82
'yehI'	28.5077	33.4438	29.9327	31.1191	29.2625	28.5722	28.3907	28.3252	27.3612	13.277	15.3017	13.0164	13.1605	14.2119	14.4127	15.854	15.4837	12.5034
'yehK'	0.421001	0.0875493	0.373381	0.236647	0.312634	0.501266	0.0574711	0.422764	0.437279	0	0.0604809	0.169779	0.174697	0	0.117654	0.199004	0.209948	0.0922761
'yehL'	3.12743	2.97667	2.17806	1.89317	3.00129	2.00506	1.89655	1.58537	1.68665	0.737613	1.14914	1.01867	1.28111	1.27543	1.11772	1.65836	1.52212	1.56869
'yehM'	8.42001	9.10512	7.77878	6.86276	8.6287	9.02279	7.41377	8.61382	7.49621	4.37299	5.26184	4.30107	4.77505	4.91952	4.82383	5.17409	5.93103	5.39815
'yehP'	2.76657	2.71403	2.24029	4.023	2.25096	2.43472	3.44826	3.11789	2.62367	2.00209	2.05635	2.20713	1.45581	2.55086	2.52957	2.52071	3.2542	1.66097
'yehR'	2.88686	2.97667	2.80036	3.78635	3.18887	3.65208	2.81608	2.3252	3.43576	3.47732	3.50789	2.60328	2.79515	2.67233	2.52957	2.78605	3.2542	3.36808
'yehS'	58.0981	63.9985	64.2216	60.9366	57.9623	57.5024	70.1147	64.2073	67.0286	53.7404	59.4527	58.5171	55.2624	44.2757	42.1203	43.8471	40.9924	61.5482
'yehT'	26.523	25.3017	27.4435	23.428	23.6977	27.0684	28.1608	27.4268	27.1738	80.1891	79.0485	71.4769	65.3366	65.7151	61.2392	62.8188	62.7745	70.9603
'yehU'	31.6352	32.9185	37.027	30.0542	31.1383	32.2242	35.6321	34.878	34.2951	125.394	123.623	109.507	110.991	112.663	100.418	107.263	102.455	106.487
'mlrA'	59.7821	53.3175	55.136	70.1658	72.0934	73.2564	69.8848	64.4187	64.9671	6.48046	6.41098	6.28182	9.49186	10.8715	12.8243	22.9517	20.4699	11.5807
'yohO'	1.38329	1.57589	1.92914	1.30156	1.6257	2.64955	1.66666	2.58943	1.49924	0.31612	0.604809	0.452744	0.698787	0.607348	0.529445	1.12769	0.52487	0.645933
'yehW'	31.8758	30.4671	34.6622	38.3368	35.9529	35.3751	38.4481	37.3089	35.9818	3.79344	3.93126	3.50876	4.30919	4.37291	9.17705	14.8589	15.1687	7.65892
'yehX'	29.6505	24.864	30.6173	31.5924	32.7015	33.7996	35.1148	33.187	34.6075	4.10956	2.47972	1.92416	3.84333	4.06923	7.29458	14.9253	12.4394	8.21257
'yehY'	74.8178	75.9928	76.3565	70.8757	77.8458	77.2666	84.8273	79.1097	76.5863	8.85136	7.98348	5.14996	10.54	10.9323	20.5307	34.693	29.0253	22.3308
'osmF'	171.528	173.26	171.133	149.324	166.821	150.523	161.034	147.228	144.052	18.2823	16.7532	12.1109	32.6101	32.7968	51.062	86.1686	78.3631	51.813
'bglX'	298.008	293.815	294.162	268.594	255.172	259.799	277.7	286.687	266.365	206.005	192.511	198.698	204.395	202.976	224.308	199.932	178.351	224.139
'dld'	439.043	455.869	453.783	410.346	431.247	420.204	425.516	422.289	422.474	218.491	213.558	194.906	343.57	351.776	346.61	464.076	465.245	366.982
'pbpG'	123.113	123.094	122.469	120.098	116.612	121.378	115.632	119.272	126.186	90.0415	90.2375	95.3592	82.9228	79.2589	76.2989	69.9166	68.9679	78.2501
'yohC'	50.5201	48.4147	47.0461	61.2915	71.7807	66.3103	61.5515	58.1301	63.5304	3.47732	4.05222	4.24447	3.9598	4.73731	4.76501	14.7926	13.9091	7.47436
'yohD'	62.1878	57.5199	62.8525	69.2192	75.6574	70.3921	77.9882	68.8049	68.2155	30.8217	27.1559	26.5421	29.6985	31.8858	35.9434	48.8222	49.7577	38.8482
'yohF'	68.6231	60.7592	67.2086	69.9292	77.2831	74.0441	77.0687	69.1748	70.7142	8.37718	8.76973	6.79116	12.9858	12.815	21.119	41.1274	42.357	19.7932
'yohP'	30.4323	27.578	30.6173	28.9892	38.454	39.3852	36.6091	31.813	37.8558	0.94836	1.08866	0.792302	3.20278	4.12997	3.17667	13.8639	12.282	4.89063
'dusC'	21.892	16.0215	17.3	10.7674	13.5058	13.0329	14.5402	13.5813	14.3677	7.4815	8.10444	9.84718	5.82323	5.83054	6.11803	6.43445	5.51114	7.05912
'yohJ'	12.9307	8.57983	9.64569	10.1758	9.75418	9.0944	9.5402	9.45935	7.99595	2.58165	2.78212	2.3769	4.89151	6.31642	4.70618	5.63844	7.71559	2.72214
'yohK'	23.0347	24.7764	18.9802	23.1914	20.6964	22.8434	21.4942	22.7764	18.7405	6.53314	7.923	9.62081	12.5199	14.2727	11.1772	17.1143	17.3732	6.45933
'cdd'	117.098	108.211	111.703	91.5823	94.603	99.8235	105.057	99.3496	99.5746	372.863	459.292	975.323	387.943	489.097	415.026	389.251	392.865	329.38
'sanA'	32.838	32.2181	33.4176	32.6573	28.9499	29.6463	30.0574	29.2236	32.1088	31.8754	30.8453	31.8618	37.2104	28.6061	34.7081	30.2485	24.9313	25.9757
'yeiS'	6.49544	5.8658	7.52986	5.08791	7.87837	7.16094	7.64365	7.13414	6.99646	9.64165	7.923	6.73456	9.89949	10.3249	8.05933	9.15417	6.77083	8.62782
'preT'	6.91644	6.74129	6.22302	6.86276	6.75289	6.15841	6.5517	5.3374	5.80956	199.893	224.626	191.794	372.978	390.039	307.255	209.816	199.188	186.859
'preA'	9.92358	9.36777	10.8281	9.5842	9.69165	9.38083	9.9425	9.82927	8.4957	159.641	202.43	176.457	202.823	270.148	247.957	149.584	156.254	185.429
'mglC'	4.27015	3.50197	3.36043	2.83976	2.50107	2.07667	1.89655	3.06504	2.18639	115.015	93.2616	298.641	96.7238	76.1007	159.187	41.9234	37.4232	517.992
'mglA'	3.90929	4.02727	3.2982	3.19473	2.87623	3.0076	2.52873	3.64634	2.62367	130.031	94.2293	348.5	170.912	132.341	199.13	60.1654	62.512	409.752
'mglB'	4.69115	5.8658	5.72518	7.5727	4.81456	4.43978	4.54021	3.96341	3.06095	355.477	271.378	769.551	686.85	549.711	795.697	284.044	283.482	1275.62
'galS'	5.11215	5.8658	5.04065	4.14132	5.3773	4.86944	5.80458	5.65447	5.9345	39.4096	36.5305	49.915	125.956	107.197	83.1229	70.1156	86.4461	69.3916
'yeiB'	35.364	33.8816	36.7158	39.4017	42.9559	36.3776	43.9654	39.5284	43.8528	21.4435	21.2893	22.6938	20.0319	18.7671	20.1777	16.451	17.5832	26.8062
'folE'	243.699	241.373	231.683	233.689	235.226	225.999	236.781	221.845	240.503	128.661	122.958	145.614	131.547	115.518	117.419	113.167	106.496	158.623
'yeiG'	134.78	128.697	122.096	121.045	116.612	120.733	127.701	125.719	121.126	59.6413	59.0294	61.6863	83.0975	84.5428	91.0646	122.255	114.422	120.282
'cirA'	1846.33	1750.99	1675.05	1100.88	953.659	997.877	1030.46	1018.81	1043.22	11.3803	13.2453	13.4691	13.6264	12.6328	13.6479	12.7362	16.5334	14.026
'lysP'	162.446	149.622	148.295	153.229	175.2	163.413	177.356	168.26	170.039	74.815	70.4603	76.7967	69.0053	65.4114	61.1803	81.4588	72.957	92.4607
'yeiE'	93.2215	94.6407	100.377	118.205	135.37	120.59	146.379	135.972	134.37	117.28	122.413	117.77	122.812	126.632	123.008	156.151	146.281	200.47
'yeiH'	36.7473	32.3057	39.7029	39.1651	41.2052	43.0373	42.5861	41.8536	42.1662	32.613	27.2164	29.7679	30.1643	28.6668	29.7666	32.9683	32.6994	31.9737
[truncated: 2,264 more rows]

## Sheet: poor-5FU_S01 - log2 and pval
Gene name	log2FoldChange	FDR adj pval
trpC	2.11292	6.90022e-169
trpD	2.56655	6.90022e-169
trpE	2.87489	6.90022e-169
trpL	3.12351	2.37898e-277
mtr	1.81178	4.20644e-237
trpB	1.39633	2.93267e-156
aroH	1.24197	6.39886e-141
trpA	1.24792	3.08912e-132
cyoE	-1.46999	2.89725e-104
yeaD	1.15522	7.64215e-92
metE	0.984722	1.95464e-89
cyoB	-1.24373	7.70158e-82
gatD	0.889585	1.22921e-72
dtpA	0.92027	1.252e-72
yhbW	1.33934	2.1267e-72
cysP	-0.892859	1.13909e-70
gadC	1.031	1.51186e-65
rplV	-0.846565	8.17516e-65
purA	-0.968994	1.77876e-62
ilvB	-1.03938	2.44402e-61
pyrC	0.823185	6.7129e-61
putA	-1.1014	1.3013e-60
fdoG	-0.998046	1.71802e-59
rpsS	-0.797783	1.61859e-58
aceF	-0.833405	1.15799e-57
sdaC	-0.803308	1.79327e-57
fdoH	-1.5363	7.35784e-57
yhiM	0.785522	5.89041e-56
lpd	-0.774526	2.97654e-54
asnA	-0.850486	2.98342e-54
rplP	-0.753703	2.19274e-51
ymdF	1.0345	2.75634e-51
ilvG	-0.805426	7.18819e-51
rplW	-0.739784	1.69817e-50
cyoC	-1.61128	8.00788e-50
rpsC	-0.790882	1.8825e-49
nmpC	-0.73536	1.97852e-49
gadB	0.951877	6.29545e-49
sdaB	-0.893009	3.41917e-48
rpsQ	-0.719539	3.58897e-48
ompF	-0.732713	3.84397e-48
asnB	-0.786743	1.23939e-47
cirA	-0.734378	4.92063e-47
rpmC	-0.730402	6.83129e-47
rplI	-0.712943	1.64189e-46
rplD	-0.731155	1.71492e-46
gadA	0.883502	1.41999e-45
glnH	-0.716038	1.62955e-45
rplB	-0.745022	1.33939e-44
gatC	0.722421	7.99633e-43
rpsF	-0.689674	1.59634e-42
aceE	-0.716279	1.42825e-41
rplC	-0.701771	3.09142e-41
rpsR	-0.720672	4.21586e-41
rmf	0.696304	5.51556e-41
lysU	-0.657239	7.12735e-40
priB	-0.676297	1.89472e-39
ydiH	0.753479	2.71712e-38
pyrB	0.687753	3.11891e-38
cysA	-0.640608	3.18196e-38
cysU	-0.777239	7.39631e-37
rpsJ	-0.642385	9.81819e-37
yjiY	-0.634307	2.62799e-36
purC	0.625094	2.8225e-36
cspA	0.619301	4.42153e-36
gatB	0.661501	4.48287e-35
rplA	-0.648844	1.66825e-34
rpmE	-0.604349	4.95975e-34
cysD	-0.605383	1.41937e-33
gatA	0.593878	4.27109e-33
rpsI	-0.601867	2.09795e-32
guaB	0.601354	2.76889e-32
fbaA	0.676071	5.89094e-32
rplK	-0.587621	7.64023e-32
cysW	-0.666551	1.49642e-31
cyoD	-1.42081	1.84222e-30
iaaA	-0.571787	2.41085e-30
mdtF	0.580828	1.04603e-29
rplO	-0.586481	3.36179e-29
rplR	-0.558055	3.83472e-29
hisD	-0.603061	6.09932e-29
katG	-0.55311	8.63168e-29
gcvT	-0.552083	2.58545e-28
hisG	-0.639258	5.33412e-28
yfcC	-0.878166	7.23543e-28
yeeE	-0.596744	9.3711e-28
rpsE	-0.558885	9.48675e-28
gadE	0.543963	1.42984e-27
fabA	-0.543287	2.04747e-27
pyrD	0.629094	5.39066e-27
pgk	0.598666	1.03729e-26
cysJ	-0.531698	1.17822e-26
yjjZ	0.531378	1.9836e-26
fdoI	-0.998418	5.06093e-26
gatR	0.786554	7.92212e-26
fiu	-0.792201	3.00271e-25
yebV	0.524506	4.00124e-25
mdtE	0.516538	4.10156e-25
aidB	0.514495	5.3455e-25
apt	-0.543265	1.77791e-24
evgS	0.55225	1.77791e-24
pyrE	1.8784	1.81058e-24
ydaM	0.634456	1.92234e-24
ydjN	-0.511435	2.72929e-24
rplF	-0.523789	3.76811e-24
rplY	-0.506444	5.92029e-24
rplM	-0.513817	7.27028e-24
ybhB	0.622842	7.36257e-24
mntH	0.518547	8.11681e-24
apbE	-1.05614	1.12364e-23
cyoA	-0.862983	2.33319e-23
potD	-0.495995	2.69086e-23
hisB	-0.551717	4.77531e-23
fruA	0.529432	5.04807e-23
hisC	-0.553106	5.2845e-23
rph	-0.850378	6.81668e-23
yhbU	-0.695475	7.79376e-23
dcuC	-0.523482	1.01578e-22
dusB	-0.494151	1.04753e-22
rpmD	-0.550466	1.32239e-22
oppF	0.50844	1.38817e-22
hybO	-0.774886	2.6728e-22
rplQ	-0.500296	2.91314e-22
cspE	0.525496	1.02058e-21
manZ	0.488374	1.16881e-21
rpsH	-0.485563	1.58409e-21
elaB	0.493528	1.68079e-21
lpxP	0.686395	2.44209e-21
sodA	-0.557099	2.99999e-21
rpsN	-0.475325	5.11115e-21
nadB	0.489759	5.62938e-21
ygaM	0.464082	1.66278e-20
rplS	-0.466342	2.54647e-20
hdeD	0.495214	6.65419e-20
thiE	-0.565119	1.59863e-19
oppB	0.457071	2.75742e-19
grxB	0.448723	3.06144e-19
fruK	0.65613	8.99515e-19
rpsK	-0.455693	9.08634e-19
phr	0.541768	9.30351e-19
sra	0.453104	1.37706e-18
rplE	-0.464734	2.66532e-18
cysN	-0.437299	2.99596e-18
yobF	0.438561	3.95957e-18
cydB	-0.446911	4.44835e-18
osmY	-0.48322	4.77671e-18
rseC	0.520165	7.39075e-18
gapC	0.442221	1.1909e-17
dppA	0.4404	1.19237e-17
yahK	0.431385	1.55088e-17
carB	-0.436649	2.34092e-17
rplX	-0.428249	4.66967e-17
ybaT	0.420608	9.82522e-17
mnmG	-0.460883	1.09639e-16
flk	-0.846827	1.69674e-16
glsA	0.471943	1.73363e-16
rpmH	-0.416525	1.76814e-16
cysI	-0.414684	1.79787e-16
pykF	0.443083	2.07375e-16
ybiT	-0.425005	2.07376e-16
ycaC	0.422878	2.26881e-16
oppD	0.42703	3.10676e-16
yeeD	-0.544375	3.27866e-16
gcvH	-0.459663	3.6714e-16
livJ	0.87646	4.29162e-16
rpoA	-0.473384	8.49097e-16
manY	0.410041	9.26232e-16
flu	0.448108	1.22607e-15
yciW	-0.542992	1.25534e-15
ynjE	-0.633576	1.78598e-15
fimB	-0.628621	1.81521e-15
rbbA	-0.583084	1.88296e-15
yagU	-0.405521	3.03181e-15
mdh	-0.408585	4.28622e-15
gsiA	-0.397413	4.30136e-15
rimM	-0.401653	4.79664e-15
yhiD	0.401992	5.02205e-15
yhbV	-0.640614	5.15503e-15
greA	-0.447565	5.15503e-15
tatE	0.411979	5.52898e-15
rpsD	-0.427259	5.8297e-15
serA	0.409096	5.94908e-15
cbdA	0.395086	1.24427e-14
thiH	-0.419227	1.27464e-14
thiC	-0.389347	1.42634e-14
aldB	0.649012	1.44962e-14
secY	-0.457494	2.5462e-14
sfsA	0.462936	3.41049e-14
cydA	-0.406942	3.44593e-14
purN	0.468938	3.44593e-14
rplL	-0.425446	3.58776e-14
ilvN	-1.14075	3.9895e-14
trmD	-0.398667	5.01418e-14
copA	0.382303	5.10217e-14
yceD	-0.388096	5.26252e-14
ygdH	0.379272	6.06284e-14
cadB	-0.793821	6.20491e-14
bssR	-0.394711	6.46087e-14
ilvI	0.46272	6.56267e-14
yhdV	0.947257	9.4717e-14
xseA	0.425024	9.92257e-14
rplJ	-0.429609	9.92257e-14
oppC	0.385394	1.04316e-13
rapA	-0.412285	1.04573e-13
ybhC	-0.425916	1.04743e-13
alaE	-0.80201	1.06052e-13
potA	-0.495283	1.11943e-13
ybgA	0.537089	1.42972e-13
rpmA	-0.377075	1.44084e-13
gatZ	0.42408	1.79014e-13
rseB	0.374616	1.89358e-13
ycaO	-0.475129	1.98951e-13
hisH	-0.503601	2.11995e-13
ivy	0.371139	2.3158e-13
pagP	0.553731	2.55144e-13
yedE	-0.830298	2.73767e-13
hisA	-0.444883	2.86441e-13
thiG	-0.423493	4.40812e-13
gadX	0.368903	4.6624e-13
stpA	-0.502749	4.73958e-13
manX	0.375804	5.13159e-13
cbdB	0.365309	5.32233e-13
fis	-0.476288	5.52473e-13
dkgA	0.399202	6.26299e-13
gadW	0.365263	6.26299e-13
tsx	-0.411891	6.34266e-13
rpmF	-0.368496	1.01541e-12
cysM	-0.367786	1.05534e-12
patA	0.409934	1.19109e-12
cadA	-0.579203	1.25669e-12
ynfK	-0.368642	1.31472e-12
avtA	0.404353	1.56799e-12
cbpA	0.366605	1.68139e-12
hisF	-0.433521	2.0871e-12
pnuC	0.363896	2.11954e-12
hisI	-0.401179	2.16945e-12
yhcC	-0.714128	2.38599e-12
rpsM	-0.370097	2.6053e-12
hdeA	0.475849	2.71638e-12
iscR	0.360378	2.8109e-12
thiF	-0.428026	3.96512e-12
rplU	-0.359744	4.37005e-12
opgB	-0.482716	6.20916e-12
rluB	-0.491193	7.24918e-12
cbpM	0.36102	8.07532e-12
yjbR	0.427631	8.21186e-12
deaD	-0.347479	8.69258e-12
dctR	0.427094	8.74266e-12
mgtA	-0.459073	8.96749e-12
ycbK	0.346841	1.23411e-11
yccA	0.348423	1.55959e-11
metK	0.343204	1.59348e-11
rpsO	-0.344632	1.86733e-11
fbaB	0.34858	2.127e-11
ydbA	-0.394455	2.47306e-11
nadA	0.360998	2.48425e-11
yjbQ	0.369282	2.48425e-11
ptsH	0.360794	3.26658e-11
nfuA	0.342202	3.33857e-11
frdA	-0.336288	4.1552e-11
bglJ	0.405336	4.85596e-11
yjdN	0.652116	5.07689e-11
upp	0.365778	5.407e-11
udp	-0.333711	5.91295e-11
rhtC	0.414621	6.42869e-11
hisJ	-0.554808	6.6306e-11
yeiE	0.436831	6.99201e-11
hycC	1.08463	7.52299e-11
yghE	-0.508738	7.59785e-11
tktB	0.339634	7.68707e-11
glyA	0.372799	8.09309e-11
curA	0.406809	8.29975e-11
yjiG	-0.369862	9.18472e-11
elbB	-0.406642	9.3115e-11
sdaA	-0.344071	1.07686e-10
purM	0.329122	1.07686e-10
ybaA	0.738275	1.09239e-10
metF	0.684673	1.19168e-10
shiA	0.333382	1.27538e-10
talA	0.326671	1.47113e-10
icd	-0.330005	1.87181e-10
cysK	-0.359274	2.12301e-10
yobD	0.803365	2.14846e-10
moaB	-0.423729	2.30335e-10
oppA	0.420146	2.64688e-10
patD	0.538213	2.79666e-10
rpmB	-0.328739	2.92141e-10
yfiF	-0.337286	2.93138e-10
iraP	-0.510549	3.24698e-10
eco	-0.417908	3.53978e-10
tpiA	0.348377	4.08784e-10
nhaB	-0.369874	4.3381e-10
fhuE	-0.319509	4.57732e-10
yegP	0.369103	5.34222e-10
yfjW	0.642516	7.87559e-10
yidA	0.348457	7.98162e-10
ompW	-0.593645	8.17418e-10
dhaM	0.331869	8.40553e-10
uraA	0.596462	9.80569e-10
rplN	-0.340024	1.17283e-09
yohC	0.513402	1.35172e-09
thrL	0.388898	1.93192e-09
pal	-0.312052	1.96133e-09
gabT	0.352932	3.33081e-09
ydgH	0.319752	3.60967e-09
serC	0.315993	3.96688e-09
appA	0.304924	4.02432e-09
rpmJ	-0.30195	4.40242e-09
fruB	0.398211	4.51976e-09
ppsA	-0.37634	4.83581e-09
purP	0.308558	5.01717e-09
yccU	0.318492	5.5472e-09
nfo	-0.380274	5.87003e-09
yhhJ	-0.599898	6.10252e-09
ynfE	-0.332896	7.00694e-09
thiL	-0.441386	7.27875e-09
yjgX	0.507223	8.56458e-09
pdxA	0.338813	8.85814e-09
yeaJ	-0.628571	8.85821e-09
fecB	0.418849	9.03113e-09
adhE	0.444238	1.03685e-08
katE	0.29664	1.04331e-08
purT	0.335243	1.07681e-08
yjdM	-0.358198	1.28867e-08
rpoS	-0.296908	1.29285e-08
ptsI	0.35672	1.37751e-08
yjiM	-0.616891	1.37751e-08
pflB	0.44376	1.4377e-08
proW	-0.610683	1.4377e-08
ggt	0.292971	1.48819e-08
hybA	-0.662384	1.63114e-08
amyA	0.291703	1.66532e-08
adhP	0.309697	1.844e-08
rhsC	0.451302	1.88665e-08
cysC	-0.398263	2.09197e-08
yciU	0.393379	2.19769e-08
yhaL	-0.560138	2.48732e-08
rpsP	-0.287686	2.51095e-08
slp	0.311154	2.51095e-08
menF	0.329346	2.83903e-08
slyD	0.296242	2.99055e-08
narI	0.43992	3.07938e-08
proP	0.285228	3.27398e-08
sufS	0.316032	3.36967e-08
ribB	-0.291426	3.70168e-08
yegD	-0.617636	3.84788e-08
fecA	0.290927	3.89635e-08
narH	0.336015	4.56757e-08
fimA	-0.306318	4.93564e-08
guaC	-0.28217	6.62768e-08
yjiH	-0.29117	7.12011e-08
rpsG	-0.293426	7.38161e-08
rimO	-0.485958	8.09394e-08
yaiA	0.389353	8.55446e-08
poxB	0.277459	8.55446e-08
sodC	0.350763	9.61743e-08
ygiW	0.277568	9.76273e-08
hdeB	0.315507	1.07241e-07
recB	0.302578	1.07249e-07
aspC	0.278067	1.10044e-07
yghU	0.285157	1.13171e-07
ypeC	0.353251	1.20507e-07
hdhA	-0.273788	1.35306e-07
hycA	1.15293	1.44011e-07
yqeI	0.459707	1.66918e-07
dbpA	0.397565	1.7435e-07
infB	-0.279379	2.04393e-07
yccJ	0.276117	2.15876e-07
cysB	-0.301785	2.36038e-07
pfkB	0.273799	2.41149e-07
leuL	0.46097	2.44311e-07
yhhX	0.281941	2.44311e-07
rpsL	-0.286305	2.65534e-07
yebC	-0.269045	2.66764e-07
yhbE	-0.38617	2.84582e-07
gapA	0.382095	3.03062e-07
bioF	-0.551874	3.28845e-07
proB	-0.266399	3.34176e-07
zitB	0.309048	3.38565e-07
ybgE	-0.341754	3.47795e-07
pyrH	0.301212	3.48633e-07
pepB	0.318879	3.59755e-07
hybB	-0.681583	3.77253e-07
tsgA	-0.386138	3.84037e-07
nagB	0.304296	3.94783e-07
ecnB	0.286188	4.12563e-07
trpR	0.364663	4.26899e-07
adiC	0.339715	4.34574e-07
gcvP	-0.26607	4.66032e-07
borD	-0.451017	4.68658e-07
ybjM	0.344655	4.69285e-07
ydcH	0.500422	4.88181e-07
yghX	0.518001	4.88181e-07
codB	0.41798	5.17699e-07
cvrA	0.337432	5.35162e-07
fepA	-0.269486	5.43549e-07
wrbA	0.26575	5.65182e-07
mlrA	0.413398	5.9451e-07
yifE	-0.268797	5.95244e-07
purL	0.268388	6.34605e-07
aegA	-0.467415	6.99164e-07
tsf	-0.269367	7.14145e-07
yhjD	0.328877	7.14145e-07
brnQ	0.274608	7.32343e-07
dmsA	-0.303937	7.41628e-07
rsmJ	-0.372372	7.85116e-07
crr	0.280669	8.7532e-07
hydN	0.8712	8.8438e-07
yjiT	-0.379831	8.92518e-07
apaH	0.309288	8.99718e-07
yghJ	-0.292238	9.1666e-07
agp	0.28322	9.24313e-07
dapE	-0.328205	9.72182e-07
guaA	0.255282	9.87112e-07
rpmI	-0.258507	1.01314e-06
hycB	1.29537	1.01654e-06
xanP	-0.265489	1.04528e-06
rsmA	0.280236	1.0626e-06
otsB	0.274505	1.22137e-06
aroL	0.320276	1.26461e-06
mppA	-0.327698	1.26558e-06
yneM	-0.517637	1.27211e-06
yhcO	0.479596	1.28451e-06
pyrI	0.315286	1.31455e-06
ydbJ	0.343252	1.40167e-06
yfgD	0.281616	1.40167e-06
yigL	0.359068	1.71488e-06
dps	0.286059	1.75523e-06
yeaH	0.264443	1.77781e-06
fdhE	-0.317006	1.80801e-06
yecF	-0.530639	1.94347e-06
intF	-0.357911	2.02746e-06
add	0.345155	2.23965e-06
ybjX	-0.257137	2.24671e-06
ydiZ	0.309896	2.46173e-06
csrA	0.247133	2.48678e-06
entA	-0.246806	2.4994e-06
uvrC	0.248028	2.65091e-06
hyaF	0.299047	2.65625e-06
nikA	-0.672815	2.73071e-06
yhhN	0.324401	2.76728e-06
sucA	-0.268791	3.00517e-06
mipA	-0.246442	3.0787e-06
nirB	-0.302277	3.16668e-06
uhpA	-0.389903	3.42926e-06
yahO	0.24322	3.53813e-06
yeaQ	0.242669	3.7121e-06
srmB	-0.304507	3.86514e-06
miaB	-0.284228	3.96297e-06
ycbL	0.242699	4.5079e-06
gpt	0.353011	4.51799e-06
yahA	-0.589167	4.70098e-06
yhjA	-0.48471	4.70098e-06
ycgB	0.254344	4.75577e-06
queA	-0.340653	5.19943e-06
grcA	-0.305669	5.31583e-06
sufE	0.435788	5.32681e-06
nuoG	-0.2483	5.66103e-06
yliI	0.445054	5.8676e-06
cpdB	-0.306592	5.8676e-06
narL	-0.310252	6.13774e-06
folD	0.240516	6.2594e-06
cueR	0.292783	6.82167e-06
fadL	-0.511559	6.93858e-06
sucC	-0.264933	6.95489e-06
alaA	0.240877	7.01009e-06
fhuA	-0.251324	7.48875e-06
cspC	0.244997	7.57564e-06
pdxH	0.285735	7.70161e-06
yqeJ	0.898066	7.75543e-06
yajO	0.241229	7.7712e-06
fkpA	0.233961	8.92649e-06
rpsB	-0.261274	9.41348e-06
narJ	0.417486	9.99632e-06
yodD	0.337025	1.03006e-05
pheA	-0.232751	1.0401e-05
cfa	0.250961	1.13243e-05
truB	-0.286614	1.13908e-05
gsiD	0.362267	1.21918e-05
ynaI	0.399955	1.2333e-05
ycaM	-0.709276	1.27785e-05
entS	-0.271723	1.28199e-05
fimI	-0.264742	1.35037e-05
mutS	-0.265348	1.42262e-05
proV	-0.441305	1.42523e-05
ahpF	-0.229634	1.46641e-05
ptsP	0.231442	1.46641e-05
glnQ	-0.296414	1.54526e-05
ahr	0.232558	1.57926e-05
argC	-0.361838	1.73426e-05
glgS	0.242723	1.73968e-05
htpG	-0.228284	1.74425e-05
yjjJ	-0.342883	1.7498e-05
ruvC	-0.271714	1.80156e-05
gpmA	0.269323	1.91696e-05
dnaG	-0.234941	1.93099e-05
yecA	0.243271	2.06649e-05
bcsG	0.264884	2.21938e-05
gpsA	0.223703	2.55416e-05
pdxJ	-0.240871	2.64224e-05
torD	0.440577	2.66669e-05
ddlA	-0.224082	2.71568e-05
gabD	0.258732	2.71568e-05
iadA	-0.226214	2.71568e-05
gatY	0.247727	2.80454e-05
bfd	0.252816	2.82921e-05
ghrA	-0.25182	2.89462e-05
chrR	0.268332	3.06965e-05
yqfA	0.222646	3.11948e-05
obgE	-0.260657	3.21367e-05
fklB	0.241958	3.26592e-05
nlpA	-0.250812	3.30748e-05
hyaB	0.249005	3.35511e-05
argB	-0.347831	3.36112e-05
pgi	0.235111	3.41665e-05
pyrF	0.362198	3.51833e-05
fnr	0.21997	3.71587e-05
yicC	0.233916	3.81517e-05
fusA	-0.288621	3.95658e-05
mdtK	-0.281906	3.996e-05
dhaR	-0.352882	4.19445e-05
acuI	0.235109	4.19861e-05
ydcY	-0.284108	4.21597e-05
psiF	0.308704	4.25974e-05
pstB	-0.394998	4.27375e-05
uspG	-0.23246	4.35128e-05
ilvL	-0.291078	4.48892e-05
gltD	0.217832	4.48934e-05
ilvC	-0.267223	4.69053e-05
gnd	0.231534	4.72396e-05
sufD	0.24376	4.74442e-05
yfcF	0.321379	4.96274e-05
phoA	-0.397743	5.08895e-05
fdnG	-0.349274	5.1299e-05
pheP	-0.349452	5.17555e-05
yghG	-1.06339	5.30773e-05
yciI	0.225277	5.58003e-05
prfB	-0.214963	5.67232e-05
yciG	0.535151	5.82616e-05
waaL	0.308678	6.02829e-05
mepM	0.254012	6.5412e-05
nuoL	-0.242033	6.5412e-05
ybcH	-0.585371	6.77587e-05
ybiX	-0.486697	7.25834e-05
epmA	-0.431631	7.25834e-05
wecC	0.259529	7.43632e-05
roxA	0.21369	7.52266e-05
argA	-0.348867	7.74804e-05
tpx	-0.21176	7.77127e-05
pepA	-0.212472	7.85899e-05
frdB	-0.260771	7.90458e-05
cpxP	0.250314	7.98123e-05
ypfG	0.444719	8.2104e-05
bioB	-0.424784	8.6738e-05
mpaA	0.262115	8.69707e-05
fdhF	0.236922	8.70991e-05
artI	-0.214961	8.90002e-05
rplT	-0.221034	8.96533e-05
efeO	-0.372561	9.08995e-05
hycE	0.652929	9.19023e-05
aspS	-0.212906	9.21604e-05
proA	-0.208906	9.24222e-05
glgP	0.209439	9.89133e-05
pepD	0.218454	9.97967e-05
glmS	-0.213365	0.000100515
yfgG	0.33362	0.000101714
rep	-0.275315	0.000103279
tktA	0.210015	0.000103986
gpr	0.320274	0.00011099
frdD	-0.318503	0.000111177
yhfA	0.22774	0.000113225
yedP	0.287999	0.000114395
yagI	-0.363207	0.000116283
pdxY	0.291275	0.000118145
argH	-0.235948	0.000119479
bglA	0.208618	0.000120814
cysS	-0.216148	0.000121345
eno	0.259759	0.000125894
fabF	0.209722	0.000130152
mdtJ	-1.0048	0.000131662
selD	-0.213303	0.000132164
rng	0.228428	0.000132719
mug	0.246591	0.000138997
yjeH	0.37221	0.000138997
dppD	0.319978	0.000142805
mscK	-0.213436	0.000151078
dppB	0.350291	0.00015379
speE	-0.243933	0.000158122
topA	-0.204233	0.000162962
nfsA	-0.335446	0.000176689
mntS	0.297301	0.000179616
sucB	-0.209021	0.000184319
sseB	0.326325	0.00018779
yiiM	0.322063	0.000191228
eda	0.205669	0.000194945
sbp	-0.450042	0.000195591
yegQ	-0.269248	0.000197502
kefC	0.273011	0.000201848
yhiI	-0.307502	0.000202602
galM	-0.199679	0.000210629
serB	-0.270544	0.000213376
mreC	0.217543	0.00022055
qorA	0.198941	0.000227275
bolA	0.198189	0.000228478
speG	-0.294228	0.000232133
intZ	0.298757	0.000233426
ilvH	0.395203	0.000237901
entH	-0.203388	0.000238618
entC	-0.197014	0.000254826
ydcL	0.205961	0.000259771
yeiI	-0.288227	0.000261571
yoeA	-0.251251	0.000285742
hycD	1.00071	0.000286429
glpG	-0.275079	0.000294322
ylaB	0.291505	0.000301647
fhuF	0.206221	0.000303517
glyS	-0.202058	0.000309724
murJ	-0.324814	0.000310415
arnB	-0.379841	0.000310415
yjeM	-0.547483	0.000311839
yfcJ	-0.551215	0.000334269
ydjO	-0.722175	0.000336924
plsB	0.193512	0.000340699
rseA	0.19894	0.000352209
fdx	0.35897	0.000353557
gor	0.197339	0.000353902
gcvA	0.309788	0.000356131
fecI	0.192731	0.000364162
lolB	0.242749	0.000383317
nuoH	-0.290639	0.000390387
rbfA	-0.294046	0.000396549
entB	-0.191964	0.000400709
ypfH	0.268302	0.00040152
secG	-0.19366	0.000417188
tcdA	-0.350268	0.000435846
nlpI	0.19237	0.000437032
yncD	0.457589	0.000442393
cydX	-0.362387	0.000445245
trmI	-0.23985	0.000466166
uspE	0.190173	0.000470215
ynfH	0.275642	0.000478952
mrr	-0.298825	0.00048384
ubiF	0.254713	0.000501465
recD	0.266355	0.000502809
yohD	0.29553	0.000503371
speC	0.282203	0.000505058
hda	0.268101	0.000509629
fabB	0.202752	0.000510248
ygaU	0.18959	0.000510248
ygjR	0.230578	0.000563912
yjgA	-0.210617	0.000568242
ybjD	-0.259479	0.000578428
malT	-0.186711	0.000589225
yeaG	0.188577	0.000590992
ynfD	0.293824	0.000604059
pgl	0.186812	0.000605139
ydcF	-0.274482	0.000609669
ypfJ	0.204708	0.000629339
malQ	0.206163	0.000633974
ybgS	-0.292138	0.000636158
metA	0.381751	0.000666192
nuoF	-0.205351	0.000670791
purH	0.190807	0.000688781
pepN	0.184187	0.000705172
nusA	-0.184365	0.000712548
clsC	0.282484	0.000729937
emrD	-0.379585	0.00073718
ptsG	0.202402	0.000764499
yeeO	0.318187	0.000775318
tdh	-0.186641	0.000775318
ycfL	-0.235859	0.0007806
dsrB	0.319412	0.000800245
queG	0.239999	0.00081066
can	0.197354	0.000819409
ybhR	0.343516	0.000832863
yodC	0.406401	0.000839984
glgA	0.181861	0.000841411
acrZ	0.259385	0.000868892
dhaK	0.190603	0.000875148
yhdE	0.264337	0.000882447
artQ	-0.21577	0.000885756
artP	-0.194231	0.000892222
opgH	0.181096	0.000892222
yfcG	0.302663	0.000910796
ydcV	0.66451	0.0009239
mcbA	0.425874	0.00093034
gcd	-0.314759	0.0009419
yheO	0.211996	0.000955002
gmr	-0.217659	0.000956965
yfeH	0.264138	0.00100152
envC	0.217663	0.00100152
ndh	-0.182392	0.00100401
secD	-0.179744	0.0010199
hypT	-0.20608	0.00102658
ppiD	-0.180432	0.00102797
yhhT	0.337716	0.00102797
dksA	-0.180638	0.00103013
sucD	-0.218044	0.00104339
iscS	0.178868	0.00104938
pnp	0.187806	0.00105799
aspA	-0.179535	0.00107271
nuoJ	-0.351835	0.00107664
thiS	-0.497494	0.00107807
fic	0.262089	0.00109655
rluA	-0.301331	0.00110585
mnmA	-0.195801	0.00114066
yceI	-0.612759	0.00114131
ydfZ	-0.177961	0.00114131
crfC	-0.36218	0.0011664
purR	-0.178397	0.00118419
yihX	-0.247839	0.00118419
fimD	-0.221064	0.00123871
rlmN	-0.201332	0.00124542
nusB	0.204515	0.00125431
codA	0.215173	0.00126002
proX	-0.354708	0.00126951
bssS	0.179979	0.00131407
ylaC	-0.33729	0.00131459
ravA	-0.18765	0.00131459
dcuA	-0.175979	0.00131865
ydeP	-0.419012	0.00132368
dusC	-0.49799	0.00133484
apaG	0.275903	0.00135184
pgpB	0.257023	0.00136236
moaE	-0.272363	0.00140084
ribE	0.189226	0.0014066
tam	0.259821	0.00145368
tig	-0.186193	0.00149408
narX	-0.240128	0.00157521
rssA	0.189351	0.00160772
ycdZ	-0.286114	0.00161926
otsA	0.178523	0.00162709
yfeX	-0.172797	0.00164025
entE	-0.173452	0.001669
ompA	-0.244323	0.001669
glk	0.196022	0.001669
dppC	0.29628	0.00168176
potB	-0.42744	0.00170588
ydhS	0.204391	0.00177277
ftnA	-0.405125	0.00178439
dppF	0.28384	0.00178997
pgpC	0.226097	0.00184843
anmK	0.283565	0.00187634
skp	0.174759	0.00189306
ldcC	0.192378	0.00191138
ansA	-0.219671	0.00191138
kdpD	-0.225847	0.00193751
yidC	-0.17065	0.00193751
rffG	0.222883	0.00197763
arnC	-0.43417	0.00199065
argF	-0.233799	0.00204071
nudK	0.275629	0.00211027
radA	-0.211105	0.00211311
exbB	0.176228	0.00214895
leuE	-0.344574	0.00215781
lhr	0.199985	0.00217741
dnaA	-0.169364	0.00218039
yjjU	0.212158	0.00223122
yjdC	0.188026	0.00227146
mlaE	-0.209133	0.00228499
livK	0.513416	0.00234017
dicA	0.227453	0.00234885
gabP	0.351851	0.00240261
ftsW	0.193334	0.00240589
evgA	0.186173	0.0024465
dmsD	0.243593	0.00251201
gss	0.166284	0.0025988
glnA	0.166211	0.00276063
yohP	0.339913	0.0028283
yjiL	-0.545892	0.00287677
ydcK	0.254408	0.00293636
rsxB	-0.350011	0.00294111
yedQ	0.228035	0.00294111
suhB	0.249025	0.00294259
rppH	0.175219	0.00294565
moaC	-0.259923	0.00294926
glnE	-0.17534	0.00303039
treF	0.207251	0.00313274
lysS	-0.164805	0.00318305
ydjY	-0.560687	0.0031835
sodB	-0.243103	0.00324801
yddW	0.256759	0.00327375
cysZ	0.245826	0.0033504
blc	0.233769	0.00335989
insP	0.388933	0.00336332
adiY	-0.292433	0.00347373
fhlA	0.266176	0.0034923
cstA	-0.173818	0.00356614
nuoC	-0.167792	0.00362527
iclR	0.216457	0.00367233
uspD	-0.17803	0.00370425
hyaA	0.206319	0.00371292
fecC	0.323817	0.00374764
asnS	-0.162813	0.00375844
cspB	0.306928	0.0038098
macA	-0.229199	0.00389106
yaiE	0.169277	0.00390384
cycA	0.193102	0.00399544
yoaD	0.343814	0.00405896
osmC	0.159757	0.00412908
nfrA	-0.261538	0.00424879
glmU	-0.160213	0.00426035
ymdB	0.253194	0.00428958
yojI	-0.212756	0.00434894
fau	0.274477	0.00439147
murG	0.169781	0.0044286
yhbJ	0.169831	0.00445722
holD	-0.335642	0.00458652
pcnB	-0.159985	0.00461435
yhjC	-0.43356	0.00470614
ybbO	-0.222845	0.00481362
ygiV	0.248422	0.00482826
narY	0.413264	0.00494151
sdiA	-0.236212	0.00501252
murR	-0.487338	0.00503827
ychN	0.202561	0.00508062
yehD	-0.690131	0.00508062
ybhS	0.258457	0.00513552
yegE	0.233166	0.00517977
chiA	-0.265585	0.00544508
mrcA	0.238738	0.00561078
rspR	0.193485	0.00563732
yceB	0.211472	0.005647
yihM	-0.525402	0.00568369
fadR	0.186914	0.00572966
rpoE	0.157712	0.00572966
hslV	0.204317	0.00572966
dut	-0.223989	0.00576527
nudB	-0.188819	0.0057791
dnaE	0.154961	0.00600282
hmp	-0.317315	0.00600282
iscU	0.180757	0.00609685
yjdI	0.37843	0.00609685
purD	0.164802	0.0061586
edd	0.182978	0.00619956
glpR	-0.274513	0.00622963
hscB	0.237664	0.00643238
yjcD	0.179241	0.00643238
nhaA	0.155458	0.006456
purU	0.162637	0.00646439
yneG	0.355283	0.00649347
aldA	-0.372623	0.00668679
menI	0.272446	0.0066878
yfiN	0.316857	0.0066878
yhjG	0.17239	0.0066878
envZ	0.192197	0.00679415
glgC	0.154296	0.00684056
fecE	0.280031	0.00686415
rpoC	-0.185569	0.0068778
nuoN	-0.16727	0.00689286
ydhK	0.285127	0.00690349
feaB	0.335313	0.00717779
ydjF	-0.373487	0.00717779
npr	0.334163	0.00731628
luxS	0.152742	0.00747304
yciN	-0.177558	0.00748202
yedD	-0.17249	0.00763626
kdgK	-0.190154	0.00769212
yiaG	0.162388	0.00770343
fliF	-0.657255	0.00776654
fecR	0.150271	0.0078252
ygiD	0.387685	0.00788698
sstT	0.150228	0.00788698
menE	0.200057	0.00808879
mltD	0.149308	0.00809772
ptrA	0.178834	0.00810396
bioC	-0.431081	0.00827277
wecD	0.298114	0.00828287
rhsD	-0.227149	0.00842829
yohF	0.228686	0.00843694
mdtC	0.265103	0.00852792
thrB	-0.162718	0.00853074
ycbX	-0.17754	0.00855308
narU	0.374356	0.00855308
ydgJ	0.165784	0.00855308
wbbL	0.186019	0.00869355
dhaL	0.189358	0.00883262
holA	0.196831	0.00920917
mreD	0.252714	0.00920917
bioD	-0.430712	0.00921029
rnd	0.216487	0.0092937
lldD	-0.389525	0.0093827
garD	-0.29942	0.00944667
gmk	0.150403	0.00949326
ydiU	0.232714	0.00955679
blr	-0.219389	0.00961032
pbpC	0.264724	0.0096135
potC	-0.280218	0.00972724
hinT	-0.159424	0.00975292
yecD	0.212125	0.00984408
yibQ	0.25648	0.00988213
lipA	-0.163333	0.00991939
rmuC	-0.282328	0.00991939
fucU	-0.336653	0.0100188
lpoA	-0.150341	0.0100191
rpiA	0.145584	0.0100569
tufA	-0.19417	0.0102007
yddG	-0.277608	0.0102952
mnmC	0.181019	0.0104317
bcsB	0.310676	0.0106577
uvrD	-0.14909	0.0106747
chaA	-0.261532	0.0106933
nadE	0.14477	0.0107216
asd	0.149691	0.0107216
glnS	0.144746	0.0108808
araC	-0.268813	0.0110748
ysaA	-0.291211	0.0111396
eptB	0.21959	0.011199
kch	0.165537	0.0112254
dtpB	-0.232565	0.0112254
mdtM	-0.305716	0.0112254
nadC	0.182344	0.0112401
prs	0.14459	0.0112401
rpoD	-0.14629	0.0112401
yphA	0.196976	0.0112694
hns	-0.15978	0.0112705
ydfG	0.144405	0.0112705
queE	0.270933	0.011284
yejF	0.197804	0.0113631
tgt	-0.165652	0.0113721
efeB	-0.269847	0.0113721
nikB	-0.576274	0.0113721
trpS	0.145777	0.0113967
eutB	0.151224	0.0114486
trmN	0.266781	0.0114724
exbD	0.143169	0.011556
epd	0.147216	0.0115601
yidR	0.190159	0.0116611
lipB	0.232405	0.011717
intA	-0.18157	0.011884
ugd	0.324188	0.0120371
gsk	-0.178733	0.0120867
ydiE	0.335379	0.0120867
hflC	0.142533	0.0120867
sufC	0.193131	0.012107
ydcJ	0.289608	0.0121772
pliG	-0.237304	0.0123125
ushA	-0.149076	0.0124757
allC	-0.393969	0.0125778
nlpC	-0.184677	0.0126434
ppiA	0.174925	0.0128247
yjfN	0.310288	0.012965
norR	-0.296251	0.0129892
yqjK	0.142651	0.0130265
cobB	0.16941	0.0133295
yniB	0.212711	0.0133295
rimP	-0.17069	0.0133295
pepT	-0.140474	0.0134464
tsr	-0.352115	0.0134464
ydhQ	0.141646	0.0135724
yfhH	-0.346043	0.0136051
proS	0.141853	0.0136095
hupA	0.145047	0.013799
nanM	-0.278743	0.0138196
yfbR	0.239835	0.0139875
ymgG	0.374703	0.0141633
yecH	-0.213084	0.0141801
mioC	-0.175071	0.0144198
citB	-0.298159	0.0146184
phoU	-0.225822	0.0146184
yfgF	-0.305601	0.0147128
cobC	0.316463	0.0150146
bioA	-0.261815	0.0150146
pstA	-0.287983	0.0151049
ydjA	-0.207417	0.0151996
uspF	-0.198686	0.015262
yigA	0.190776	0.0154552
asr	0.394867	0.0154767
thiD	-0.210142	0.015562
yghF	-0.656372	0.0155779
ydiP	-0.342276	0.0157152
ydeA	0.285984	0.0158469
zapB	-0.139094	0.0165865
pncB	0.138611	0.0165927
ygiN	0.137333	0.016717
prc	0.139028	0.0167976
fadI	-0.502647	0.0168655
mtn	0.140453	0.0168711
yrdA	0.169308	0.0169593
osmB	0.148432	0.0170624
cra	-0.14481	0.0172256
ydhP	0.313702	0.0172256
ygiB	0.142824	0.0172256
grpE	0.136116	0.0172324
phnP	0.310128	0.0174433
secA	-0.136411	0.0174765
yebE	0.250677	0.0174765
yfdC	0.196533	0.0176289
yqhA	-0.267533	0.0176289
flhD	-0.49386	0.0177376
cnu	0.214739	0.0177584
lpxA	-0.135682	0.0178589
tnaA	0.320795	0.0180038
mraZ	-0.162138	0.0181092
nudC	0.168311	0.0182436
focA	0.138643	0.0182783
marC	0.198151	0.0182783
dxs	0.14957	0.0183904
ftsK	-0.137086	0.0184782
nrfA	-0.419907	0.0184868
tsaA	0.243082	0.0186448
sohB	0.139286	0.0186729
ybaK	-0.211565	0.0186903
adiA	0.25595	0.0186903
ymgE	0.288982	0.0187657
iscA	0.159274	0.0188743
minD	-0.134683	0.0189537
ynjB	-0.246413	0.01897
pdhR	0.26442	0.018978
purE	0.147301	0.0190335
yjgH	0.284165	0.0193999
fliC	-0.180508	0.0198838
wcaN	0.134004	0.0198838
yijE	0.315453	0.0198838
hsdR	-0.173826	0.0200534
yhgE	0.225724	0.0201584
tmcA	0.159934	0.0201894
yjaG	0.165454	0.020269
insO	-0.406941	0.020269
cdd	-0.178682	0.0203694
yfiB	0.291151	0.0204664
mnmH	0.288175	0.0207254
ybiJ	-0.346113	0.0208064
argG	-0.135654	0.0208936
yjgR	0.172428	0.0208936
sixA	-0.159237	0.0208992
nadK	0.163114	0.0208992
degP	0.13235	0.0210035
mlaF	-0.151953	0.0210035
sdhA	-0.390463	0.0211218
lysP	0.156014	0.0212257
ftsA	0.135735	0.0213879
rlmC	-0.300317	0.0213879
yneE	0.291835	0.0215837
torR	-0.332666	0.0218278
hscA	0.134035	0.0218278
ybdK	0.164653	0.0218912
yhjJ	0.143303	0.0219057
pqqL	0.172862	0.0219541
hipA	-0.276609	0.0220783
yegS	0.162839	0.0221312
ptsN	0.142925	0.0222162
yfcA	0.213183	0.022222
yeaK	-0.175913	0.0223139
yeaP	0.170609	0.0224285
yqjD	0.131385	0.0225585
dapA	0.13415	0.0227057
rffH	0.177583	0.022878
rnpA	-0.201929	0.0229524
yahM	-0.44049	0.0229847
csgD	-0.184578	0.0231637
yaiC	0.445526	0.0231752
pmbA	0.138205	0.0231752
rimL	0.233433	0.0234714
ftsP	-0.149221	0.0234714
inaA	0.222536	0.0236767
cdh	-0.362128	0.0236767
narP	-0.209956	0.0238658
gltP	-0.149856	0.0242502
ybjC	-0.406902	0.024385
hyaC	0.176595	0.024385
yjiA	-0.180543	0.0247213
glnD	-0.151859	0.0247486
yebT	0.147214	0.0247941
yafD	0.144247	0.0248138
uxaB	0.323897	0.0251607
yfdE	-0.47073	0.0251794
gpp	0.130721	0.0261937
yeaE	0.207842	0.0263674
metG	-0.128082	0.0264676
ycaP	0.212998	0.0265379
kbl	-0.129338	0.0266212
rfbB	-0.143165	0.0266326
ispU	0.148193	0.0266831
dadX	-0.246975	0.0268823
ibsC	-0.414608	0.0270556
thrC	-0.132177	0.0270854
thiI	-0.159934	0.0271191
atpB	-0.127839	0.0271191
ygeV	-0.281014	0.0271417
mraY	0.1437	0.0272512
betA	-0.340018	0.0272512
bcsE	0.132273	0.0272512
puuA	-0.373916	0.0273073
metN	0.177852	0.0273201
rnr	-0.127675	0.0273201
purK	0.131173	0.0273697
fimC	-0.200126	0.0275264
yqjI	-0.200397	0.027618
pdxK	-0.160969	0.0276253
rclA	0.229824	0.0276278
sufB	0.135094	0.0276278
yfcH	-0.14918	0.027885
aroM	0.227564	0.0280425
bamC	0.128624	0.0280425
yafK	-0.14165	0.0280826
argS	-0.134246	0.0287286
ada	-0.232459	0.0287286
yfbU	0.132991	0.028934
gnsA	-0.416865	0.0290434
dadA	-0.208571	0.0290675
lon	-0.128148	0.0295523
endA	-0.443946	0.0297745
xerC	0.155813	0.02992
ycaN	-0.325815	0.0302287
ybcF	0.467839	0.030397
glnL	0.198759	0.0307108
yihA	0.141811	0.0308657
btuB	-0.14256	0.0309555
yhhW	0.181723	0.0312349
rhlE	-0.168753	0.0314098
srlD	0.342875	0.0315625
menB	0.13726	0.0321063
ybhL	0.125302	0.0321177
ycbJ	-0.144982	0.0322136
hsrA	0.244438	0.0322797
narV	0.458963	0.0327354
lhgO	0.195899	0.0331367
yihG	-0.352895	0.0332068
pck	-0.12586	0.0332325
yeiH	0.237489	0.033263
yfbS	0.167747	0.0333166
hemD	0.163703	0.0333682
hsdM	-0.191208	0.0333682
pgsA	0.151228	0.0335256
nanA	0.311354	0.0335256
glyQ	-0.123129	0.0338251
yihN	-0.54279	0.0338251
bhsA	-0.416369	0.0341089
ybjG	-0.221334	0.0341979
menC	0.135387	0.0342445
narK	0.156235	0.0347767
yihD	-0.123967	0.0353965
rstA	-0.164017	0.0354508
nrdB	-0.141887	0.0356198
ampG	0.181264	0.036001
nirD	-0.36862	0.0360864
yehX	0.257477	0.0361632
malP	0.141817	0.0361632
ydbC	-0.179765	0.0362622
purF	0.132655	0.0362977
ygiQ	-0.168794	0.036313
nuoE	-0.175665	0.0364034
xylG	-0.45353	0.0364034
yebS	0.202776	0.0364788
pheS	-0.12146	0.0367628
yfcI	-0.373684	0.0369028
yecE	0.246544	0.0370554
wzyE	0.22556	0.0370763
uvrA	0.121482	0.0372422
intB	-0.181752	0.0372422
dacB	-0.169977	0.0377651
gltA	-0.141256	0.0378417
rbsB	0.130425	0.0379495
erpA	0.139619	0.0379879
yeaM	-0.320306	0.0381866
yegU	-0.321563	0.0383079
yaiL	0.16906	0.0383613
argI	-0.334864	0.0391106
yheU	0.352366	0.0392343
glnP	-0.172214	0.0394136
smrA	-0.234424	0.0395659
clsB	0.177302	0.0397369
pyrL	0.45151	0.0397369
uhpB	-0.279098	0.0400581
cysH	-0.123254	0.0400768
ymjA	0.25137	0.0401089
yicG	-0.445068	0.0408565
amiD	-0.146276	0.0411666
srlE	0.60137	0.0415608
dmsB	-0.24964	0.0417026
mhpD	-0.221228	0.0419094
croE	0.45088	0.0419396
ade	-0.260181	0.0421594
trxB	-0.124164	0.0430062
yaeR	0.214766	0.0433438
mtlD	-0.12342	0.043392
mfd	0.118384	0.0441129
iscX	0.236409	0.0441261
thrA	-0.117743	0.0443495
ogrK	0.400883	0.0446362
msbA	-0.126029	0.0447001
nikC	-0.532041	0.0447001
fliA	-0.554572	0.0448293
yiiS	-0.140722	0.045079
bglX	-0.122859	0.0454186
uvrY	0.11848	0.0456036
ypjA	-0.176247	0.0458198
metC	0.157573	0.0458504
nepI	-0.318313	0.0459874
hslJ	0.1727	0.0467444
artJ	-0.163978	0.0469359
nrdA	-0.119655	0.0471743
recF	0.212127	0.0471743
speD	-0.143357	0.0473121
allR	0.118282	0.0476554
pphA	0.286991	0.0485148
smtA	-0.143899	0.0487795
dacA	0.120848	0.0487847
yfbT	0.117383	0.0494195
murC	0.116791	0.0497278
fumC	0.366581	0.0497278
cusC	-0.586173	0.0498635
dnaN	-0.12763	0.0503954
tdk	-0.210258	0.050418
fimE	-0.421664	0.050492
ybaV	-0.437177	0.0506393
yobB	0.174108	0.0508761
glpD	0.220489	0.0508761
tyrP	-0.255774	0.0509719
mukB	-0.115995	0.0511116
yoaH	0.199743	0.0511116
polB	0.162742	0.0511401
xseB	0.188368	0.0511401
pppA	-0.280607	0.0511401
fhuB	0.120006	0.0516856
speB	0.124508	0.0517692
hcr	-0.29899	0.0518226
folP	0.192877	0.0527107
yigB	0.165824	0.053057
leuO	-0.309997	0.0531158
cvpA	0.144264	0.0531271
yhhS	0.20116	0.0531495
damX	-0.114067	0.0532456
yejE	0.237502	0.0533105
galP	0.148425	0.0538744
hcp	-0.359337	0.0538805
yeiB	0.22116	0.0541708
galK	-0.133286	0.0545853
rihA	0.206704	0.0549097
lysA	0.363461	0.0552617
bfr	0.150646	0.0556733
yjjI	-0.141321	0.0564323
smf	0.181768	0.057054
bamA	0.117856	0.0572527
yehW	0.226172	0.0576841
der	-0.114237	0.0576841
syd	0.159378	0.0578916
nhaR	0.150426	0.0584501
queD	0.283841	0.0584501
yggL	-0.122934	0.0584501
yjdK	-0.409613	0.0584501
znuA	0.150565	0.0586137
ybiU	-0.279709	0.0586446
msrA	0.116562	0.0589432
glpT	0.267026	0.0591261
ydiJ	0.111538	0.059424
tusD	0.201414	0.0594708
galR	0.166599	0.0595021
yjbJ	0.111417	0.0597031
nagK	0.124982	0.0603419
racR	0.138363	0.0603419
arfA	0.506619	0.0604626
yhhA	0.162748	0.060839
yfjM	-0.444992	0.0611957
rzpR	0.468886	0.0612564
frr	0.112325	0.0613413
murP	-0.241599	0.0613626
tusB	0.240698	0.0617638
rsgA	-0.115438	0.0621201
yhdP	0.118952	0.0621577
cheA	-0.411671	0.0623331
frvR	-0.531424	0.062868
aas	0.127624	0.0641279
murQ	-0.259443	0.0647055
yihW	-0.194135	0.0647055
mazG	0.151291	0.0651849
ygdQ	-0.18682	0.0654144
casD	-0.346168	0.0654508
pspA	-0.181654	0.0655839
potF	0.253217	0.0661745
mlaD	-0.147033	0.066191
sapD	0.153155	0.0663686
nsrR	0.204821	0.0664908
sapC	0.2206	0.0669783
ymfI	0.162868	0.0671482
flhC	-0.331344	0.0672592
yjjV	0.1862	0.0674977
creA	-0.227183	0.0678045
uxaC	0.19608	0.0678173
yjaH	0.212724	0.0679194
aroB	-0.108568	0.0681159
yciH	0.378604	0.068172
trkG	0.235086	0.0683387
ynfL	-0.249227	0.0683472
accC	0.108437	0.069089
zntR	0.244859	0.069308
fecD	0.239846	0.0695302
lpxH	0.170611	0.0697256
rluF	-0.140708	0.0699022
mcrB	-0.220216	0.0699673
plaP	-0.151059	0.0700806
tatA	-0.122736	0.07035
tyrA	-0.160544	0.070814
yagP	0.420653	0.070814
dapB	0.125157	0.0711267
yffB	-0.224295	0.0714839
yecM	-0.170088	0.0720522
alaS	0.115075	0.0721957
caiF	-0.208873	0.0734637
nei	0.173348	0.0737505
ynjI	0.278645	0.0739919
torS	-0.170732	0.074059
yhbT	-0.114165	0.074414
ybhN	0.220571	0.0746997
rlmG	-0.234298	0.0746997
sdhB	-0.261322	0.0747929
tsaB	-0.174329	0.0747929
ibsE	-0.219402	0.0747968
tdcG	-0.321942	0.0749714
infC	-0.118244	0.0751494
yrfF	-0.141921	0.0760748
gtrS	0.16703	0.0764571
hchA	0.106681	0.0765622
folA	0.173434	0.0767486
yieE	0.165469	0.0775071
ybhG	0.139256	0.0781253
ycjT	0.341245	0.0790371
yehE	0.134763	0.0791017
folC	0.138672	0.0791017
yijD	0.150441	0.0791017
ydfV	-0.477367	0.0792338
ynfB	-0.161367	0.0793659
gmhB	0.138404	0.0797191
bamB	0.104982	0.0799836
yqhC	-0.262295	0.0806624
ycaR	0.247097	0.0807341
yeeY	0.20485	0.0807341
glpB	0.411693	0.0807341
fryA	-0.300732	0.0822694
rna	0.131207	0.0824901
dxr	-0.136277	0.0828211
ecpC	0.275116	0.0828548
hisP	-0.341704	0.0828716
gdhA	0.104121	0.0829812
tyrB	0.109549	0.0835352
tabA	0.112864	0.0835352
arnA	-0.162281	0.0838127
wecB	0.130091	0.0843109
ydcR	0.205973	0.0843136
yehB	-0.447131	0.0843985
mdtD	0.290353	0.0849082
ygbE	0.257862	0.0852204
hypB	-0.163373	0.0852252
ybjJ	-0.167959	0.0854441
ydjZ	-0.294174	0.0855694
dcuB	-0.312054	0.0855694
rob	0.104502	0.0855724
eutC	-0.184808	0.0856357
ybaY	-0.116625	0.0859684
ispE	0.104671	0.0859684
yeiP	-0.147575	0.0860227
speA	0.104225	0.0869637
ybgQ	-0.466421	0.0870596
rhtB	0.238154	0.087648
ampC	0.244763	0.0883531
cbdX	0.259941	0.0885835
exuT	0.1815	0.0888006
betB	-0.219978	0.0893302
ybbP	0.14349	0.0895805
ybeL	0.103721	0.0896151
mutT	0.284249	0.090283
epmC	0.165496	0.090283
emrB	0.17281	0.0907535
paoC	0.21422	0.0912308
dinI	0.21523	0.0920791
putP	-0.131504	0.092524
pssA	-0.102612	0.0925829
yciA	0.225266	0.0928077
paaY	0.196486	0.0928077
yafV	0.134589	0.0928914
lplA	-0.19122	0.0931998
ydcP	-0.142271	0.0933884
djlA	0.140482	0.0946624
caiA	-0.203641	0.0954037
sbmC	0.130758	0.0954037
nupC	0.108906	0.0954037
mprA	-0.119328	0.0954037
cutA	0.190733	0.0956919
ldtE	0.105158	0.0957861
creB	-0.24636	0.0960709
bcsQ	0.273891	0.0962613
hemX	0.110106	0.0973039
yddE	0.149694	0.0977699
ygdR	0.164111	0.097936
tmk	-0.180216	0.0984835
cmoB	-0.13799	0.0984835
yhiN	-0.17544	0.0984835
uhpC	-0.293099	0.0984835
metB	0.148751	0.0989661
mepS	0.100175	0.099003
elfC	-0.280764	0.0991267
yccT	-0.235496	0.0993344
hybD	-0.20534	0.0993344
ygdD	0.227197	0.0999875
dsbA	0.100072	0.101303
yfeZ	-0.216988	0.102023
pgm	-0.0998767	0.102315
ychJ	0.129353	0.10287
arnT	0.260025	0.10287
exuR	0.121731	0.10287
lepB	0.105575	0.103406
prmC	0.160396	0.103553
thyA	0.116474	0.104535
rcnB	0.144227	0.105046
yhaJ	0.136014	0.105136
sufA	0.144026	0.106163
hslU	0.10051	0.106339
waaC	0.132913	0.106502
yjjP	-0.233059	0.106817
aphA	-0.154003	0.107059
ldtD	0.0988909	0.10717
ybdR	0.1886	0.10735
slmA	-0.146076	0.10735
ppc	0.105554	0.107631
cohE	-0.147132	0.107968
ucpA	-0.137	0.107968
narZ	0.160777	0.108445
rimK	-0.157496	0.109162
glnG	0.139791	0.110345
fimG	-0.218112	0.110599
osmE	-0.098144	0.11109
ydhR	-0.115102	0.112638
rnk	-0.140447	0.112706
hemC	0.101064	0.112879
nemA	0.119709	0.113501
elaA	0.151278	0.113505
ybgI	0.0988838	0.113743
ymgD	0.193801	0.113743
ugpC	-0.214942	0.113763
ccmA	-0.210802	0.114024
yniC	-0.141676	0.114351
lgt	0.141609	0.114447
rfbD	-0.118779	0.114574
yicH	-0.105692	0.114574
nemR	-0.24329	0.115957
napA	-0.190458	0.116822
cybC	0.176069	0.117272
kdsB	0.115503	0.117688
yceA	0.257423	0.118051
psiE	0.250251	0.118253
zwf	0.0976135	0.118605
cueO	-0.119438	0.118874
accB	0.0987018	0.118874
alsB	-0.371195	0.118874
setB	-0.307265	0.119333
amn	0.104247	0.119512
intD	-0.145335	0.120063
yieL	-0.461141	0.120063
fes	-0.0951553	0.120682
ybiW	0.235066	0.122654
cobU	-0.240101	0.1231
nrdH	-0.123607	0.1231
ybjL	-0.113227	0.123212
uspB	0.10917	0.123474
alkA	0.177801	0.123835
moaA	-0.105934	0.124831
soxS	-0.248277	0.125001
btuF	0.206809	0.125366
nadD	0.162313	0.126383
yjdO	-0.468333	0.126618
mreB	0.0943377	0.126955
cpxA	0.0991127	0.126994
fbp	-0.111895	0.127755
trg	0.259969	0.130272
trkA	0.106669	0.130295
ttdR	-0.22019	0.130323
prmA	-0.127293	0.130323
crp	0.0935051	0.13041
pqiA	0.164046	0.131044
ychE	0.177517	0.131044
yjiX	-0.220898	0.131333
hisL	-0.273069	0.131453
cof	0.165602	0.131663
ridA	-0.0929437	0.131663
pgpA	0.121626	0.131781
ybaB	-0.10173	0.1321
lrp	-0.092776	0.132433
ycaQ	0.221236	0.132433
qmcA	-0.136365	0.132653
clsA	-0.0975234	0.132653
nhoA	0.265044	0.132653
creD	0.280423	0.132653
yecJ	-0.228967	0.132749
hisQ	-0.285452	0.133029
gtrA	-0.171897	0.133705
nanS	-0.268623	0.133705
yjaZ	-0.247399	0.13427
rtcA	-0.188398	0.134313
rstB	-0.119437	0.13459
thiB	-0.125106	0.134736
rseP	0.0923246	0.135723
nfi	0.122367	0.135778
ytfQ	-0.305966	0.13636
atpE	-0.0919209	0.136398
ylbE	-0.407396	0.136509
rlmB	-0.108456	0.136802
argO	-0.231373	0.138046
ybiB	-0.103087	0.139203
paoD	0.274144	0.139292
tdcC	-0.251292	0.139338
yqiG	-0.323968	0.139895
ydhF	0.0990364	0.14015
sulA	0.138871	0.140766
rho	0.0942642	0.140878
dcrB	0.0995796	0.140993
tusC	0.20494	0.141272
oxc	-0.398297	0.141378
sugE	0.164101	0.141378
rpmG	-0.102129	0.141576
ybeQ	0.183257	0.142866
yjcZ	-0.304597	0.142893
nudI	-0.255073	0.143114
cbrA	0.388298	0.143114
exoX	-0.120379	0.143235
rssB	0.0984504	0.143426
ompC	-0.13417	0.143426
recG	0.105993	0.143426
idnO	-0.358833	0.143632
napF	-0.410502	0.143731
yoeG	-0.387458	0.144095
deoB	0.0910017	0.144345
tyrR	-0.093466	0.144711
allE	-0.174892	0.144911
ddpF	0.210288	0.145045
umpH	-0.0955516	0.145773
hpf	0.0978408	0.145773
ybiC	-0.104093	0.146543
waaQ	-0.115651	0.146543
murB	0.117418	0.146543
hemF	-0.148982	0.146556
def	0.100625	0.146556
rlmE	0.0900993	0.146842
rsxC	-0.123653	0.14834
ygiM	-0.0990187	0.148927
yghB	0.127605	0.149498
ypeA	-0.152385	0.149807
yigZ	0.136613	0.149921
ynfM	0.130026	0.150455
hybC	-0.140654	0.15073
yacG	0.184559	0.150737
yciT	-0.111615	0.150797
ypdC	0.173633	0.150797
ydhL	0.23811	0.150861
casE	-0.323401	0.150947
ybaQ	0.1217	0.151174
yraR	0.214643	0.151174
srkA	0.102109	0.151546
lacY	-0.44846	0.152215
rcsC	0.0966184	0.152215
yqjG	0.114376	0.152215
efp	0.0887093	0.152339
udk	0.127847	0.152407
lpxT	-0.211242	0.152407
murD	0.0944407	0.1535
secM	0.10978	0.154249
tilS	0.12384	0.154925
ybjP	0.091268	0.154925
bcp	0.0882163	0.154925
yqeG	-0.173174	0.154925
uxuA	0.23575	0.154925
deoA	0.0907262	0.154925
ppiC	0.126227	0.154932
murI	0.1328	0.155206
surA	0.0879849	0.156837
yciF	0.277996	0.157667
dnaB	-0.0938351	0.158309
mukE	-0.134146	0.160132
yeeJ	0.120138	0.160132
livM	0.277608	0.160132
ydjX	-0.245232	0.160493
galE	0.11198	0.160729
gltB	0.0945736	0.160729
yzgL	0.327506	0.160729
cdsA	0.107501	0.161009
rnhA	0.159625	0.161035
murA	-0.089096	0.161035
ldtC	0.183296	0.161474
napC	-0.220655	0.161474
fabR	0.105793	0.161474
tolA	0.0949029	0.16215
tas	0.0878501	0.162838
rhsA	0.164144	0.164795
rhlB	0.0871772	0.165056
yihO	-0.427124	0.165311
btuC	0.147139	0.165676
talB	0.090458	0.166973
cusB	-0.400281	0.166973
hflK	0.0876928	0.166973
mnaT	0.128351	0.167047
creC	-0.17052	0.167047
mdtB	0.142641	0.16766
fucO	-0.198536	0.167856
ydcS	0.14899	0.168357
yahG	0.224677	0.16911
frsA	0.102739	0.16919
yjfY	0.25307	0.16919
pncA	-0.139942	0.170352
purB	0.0870126	0.171199
kdpC	-0.304646	0.17327
lsrC	-0.425203	0.173391
hfq	-0.0853756	0.17355
rspB	-0.314186	0.174171
recR	-0.0902056	0.174261
fumA	0.165595	0.174261
xylB	0.209211	0.174261
yraK	0.229325	0.174895
xthA	-0.129451	0.175059
yjhR	-0.352651	0.175648
nfsB	0.0902281	0.177665
insQ	0.122213	0.177665
yfcL	0.174968	0.177905
pepQ	0.0860734	0.177905
ycjG	0.112802	0.178385
yjeJ	-0.166031	0.178675
ygiS	-0.19836	0.179717
yniA	0.0869366	0.180367
zapA	0.0849538	0.18109
yliE	0.133646	0.182055
prlC	0.0838963	0.182055
ybeX	0.0864701	0.182117
yiaU	0.219646	0.182167
cbl	-0.174206	0.182412
holC	-0.116715	0.182412
slyA	0.0951437	0.184924
dnaT	-0.155061	0.184981
ybfE	-0.178385	0.185086
yobA	0.125846	0.185086
zipA	-0.0836064	0.185086
yqeF	-0.243331	0.185407
gsiC	0.101052	0.185992
tus	-0.174748	0.187952
kefF	0.198867	0.188087
yicN	0.198222	0.188087
asnC	-0.207298	0.188087
intS	-0.187425	0.188652
ytfB	0.0982887	0.18881
ytjA	0.114209	0.18881
yajI	0.225546	0.189093
ppdC	-0.384638	0.189278
yjiV	-0.13369	0.189278
ybgJ	0.0937285	0.1898
glxK	0.245307	0.190772
rraB	0.0824723	0.190772
moaD	-0.209416	0.191476
ubiI	0.101679	0.191476
yhcF	-0.189057	0.192249
valS	-0.0845115	0.192249
yidX	0.195853	0.19248
ihfA	0.0829734	0.193136
ygdI	0.130761	0.193136
mscL	-0.0871041	0.193136
birA	0.125771	0.193368
yeiR	-0.142237	0.193555
yieP	0.101763	0.193555
gloB	0.115353	0.193775
dacC	-0.0842	0.193776
lpxM	0.102268	0.193886
cusA	-0.207635	0.194644
ybfA	0.088994	0.194978
ybaP	0.129735	0.195844
recA	0.0817877	0.195844
pldB	0.0918027	0.196512
ybjS	-0.116325	0.196637
yebW	0.200741	0.197273
cadC	-0.148725	0.197273
nuoI	-0.175214	0.197403
fliG	-0.367067	0.197503
cyaA	0.083917	0.197839
yrhB	0.378039	0.19813
yqaE	0.119927	0.199676
flgD	-0.34803	0.199905
gnsB	0.109655	0.199905
viaA	-0.0987977	0.199905
ibsA	-0.296235	0.200015
yfiM	-0.266643	0.200015
chbF	-0.233386	0.201336
trxA	-0.0812452	0.201336
mqsA	-0.176077	0.201678
yfaY	0.0881219	0.201928
pqiB	0.114375	0.202617
rsxD	0.169154	0.202617
ppx	0.0870649	0.202617
yidZ	0.164767	0.202643
tyrS	-0.0805707	0.203166
yafQ	0.209658	0.203813
yajC	-0.0805626	0.203813
tadA	0.153379	0.204478
phoH	-0.2929	0.206577
waaA	0.114143	0.207155
mdtH	0.171688	0.207729
pspF	-0.174562	0.207811
yhjR	0.157079	0.208859
pdxB	0.0833513	0.20915
bamD	0.0798537	0.20915
yhcN	-0.194896	0.2093
puuC	-0.265327	0.210277
ydfI	-0.219843	0.211185
dcd	-0.08613	0.211185
ybdL	0.215664	0.211558
rutR	0.179996	0.214059
yafW	-0.384892	0.214932
dsbG	0.128848	0.214951
yfjK	0.0976611	0.214951
gspD	-0.218865	0.214951
wecE	0.100392	0.214951
lexA	0.0859887	0.214951
yjeI	0.0797937	0.214951
yhaV	-0.14175	0.215402
dusA	-0.117286	0.21545
ydcU	0.232646	0.216395
fucK	-0.203779	0.217301
yqgA	0.165046	0.21776
yibT	-0.112437	0.219509
eutK	-0.184304	0.22098
yejA	0.105021	0.221574
setA	-0.137847	0.222055
ykfA	-0.174388	0.222578
hypA	0.292596	0.2227
yhdN	0.165835	0.222902
narQ	-0.10999	0.222917
ybhP	0.11697	0.223183
macB	-0.106041	0.223183
relB	-0.181199	0.223183
wzzB	0.0787683	0.223183
yfeO	0.116146	0.223183
eptC	0.0914504	0.223183
zupT	0.0866221	0.223697
rsmH	-0.0855806	0.224102
aroF	-0.107875	0.224874
ysgA	0.0936227	0.224874
yegT	-0.285545	0.225108
bcsC	0.100613	0.225193
flxA	-0.292328	0.225515
ybiR	0.206821	0.225681
infA	0.0797955	0.226119
cpsG	-0.362038	0.226119
yfgO	-0.10889	0.226119
hisS	0.077387	0.226119
yicS	-0.261656	0.226119
wbbK	0.10796	0.226806
deoD	0.0771327	0.227186
fsaA	0.179938	0.227873
atpC	-0.0779636	0.228276
yfiR	0.139334	0.228437
ybbA	0.149704	0.228538
tatB	-0.0936352	0.228695
plsY	0.136079	0.228838
gltL	-0.181799	0.228841
trmL	0.224711	0.228841
epmB	0.102951	0.22993
yjgL	0.0974178	0.231221
ybaN	0.104713	0.231797
ubiA	-0.129477	0.232093
lit	-0.181416	0.232298
aceA	-0.0766456	0.232451
baeS	0.189397	0.233571
mrdB	0.111226	0.23408
csiR	0.128446	0.234148
hflD	-0.109779	0.234499
yejL	-0.114403	0.235617
alaC	-0.0998535	0.235617
yqjE	0.0759745	0.235617
ydgA	0.076987	0.236302
pfkA	0.0854147	0.236636
yagF	0.160998	0.237451
nuoB	-0.0873596	0.237451
lolE	0.0835991	0.238032
yehH	-0.190756	0.238032
wecG	0.137357	0.238386
ybjQ	-0.100044	0.238841
araG	0.165454	0.238841
bacA	-0.118721	0.239
ybgC	0.10976	0.239278
pspE	0.133314	0.239955
hyaE	0.132791	0.240049
yqcE	-0.31663	0.240488
rhtA	-0.207819	0.240694
metH	-0.0764163	0.241811
yedA	0.35799	0.242447
yaeF	-0.197348	0.242548
pheL	-0.217836	0.242548
uvrB	-0.0763342	0.243507
kdsA	0.0756202	0.243914
truC	0.126242	0.244215
yedF	-0.35109	0.245049
frdC	-0.130462	0.245049
ppiB	0.075067	0.246304
agaS	-0.363179	0.246304
ygiF	-0.110454	0.246463
lsrK	-0.166672	0.246563
ptrB	0.09431	0.246669
nupG	-0.135806	0.247689
yjcC	0.128255	0.248153
yjeO	0.341422	0.248153
relE	-0.131367	0.249644
aroK	-0.0763048	0.249932
ivbL	-0.0947788	0.250439
yihI	0.0826157	0.250579
sbmA	0.126354	0.251097
ssb	0.0757723	0.25116
mcbR	0.171431	0.251655
hypF	-0.103067	0.251678
prlF	-0.142906	0.251678
phoP	-0.0832905	0.252581
ydcO	0.230547	0.252581
hemA	0.0766599	0.252897
ycdX	-0.0855867	0.252957
thiM	-0.115716	0.252957
ydgK	-0.1061	0.25308
ftsN	-0.0830948	0.255074
nfrB	-0.14784	0.255437
pgrR	-0.141552	0.255437
bdcA	-0.230725	0.255437
yhcM	0.104038	0.255518
acnB	-0.0761495	0.255691
tsaD	-0.100839	0.255691
recQ	-0.0964447	0.255691
zntA	-0.0892164	0.256012
fumB	-0.183577	0.256156
sapA	0.0899441	0.256543
ccmF	0.135271	0.257162
ecpD	0.156728	0.257969
pmrD	-0.225709	0.258429
gcvR	0.0757776	0.26005
yjcE	-0.0866405	0.262232
ftsQ	0.0797213	0.262245
mdlB	0.117521	0.262759
yifN	0.170634	0.262759
clpX	0.0765538	0.262826
csgE	-0.165488	0.262926
osmF	-0.0845751	0.264652
mdfA	-0.126417	0.265084
ygbF	-0.260674	0.265084
yhjX	-0.189662	0.265084
hemE	0.0747306	0.265545
yfjD	-0.0987133	0.26662
ykgA	-0.227068	0.26662
msyB	0.0746073	0.267198
ppa	0.0739662	0.267919
eutA	0.315998	0.270975
gspF	0.244441	0.271389
clpS	0.0983791	0.271674
ymfL	-0.256361	0.271674
ybhF	0.0823051	0.272373
fadD	-0.119073	0.272373
lpoB	-0.0734512	0.273417
mntR	0.148992	0.273922
yjfP	0.133176	0.27463
mrp	0.0846547	0.274648
rfbA	-0.080617	0.275111
yfaZ	0.199465	0.275111
yafC	-0.138904	0.277851
aqpZ	-0.162909	0.278488
ldtB	-0.0716998	0.280013
eutL	-0.160919	0.280342
htrE	-0.225754	0.280936
nudE	0.11643	0.281004
yqgE	0.0844834	0.282847
sfmD	-0.26742	0.283605
yjhU	-0.0828907	0.283613
mdlA	0.112827	0.284301
srlM	-0.345063	0.284528
ydcX	0.283986	0.285515
rnlA	-0.0715589	0.285515
xylA	0.13083	0.286618
gpmM	0.0767076	0.287764
cmoA	-0.108418	0.288335
tdcE	-0.21173	0.288335
hdfR	0.113523	0.28845
gldA	-0.0702165	0.288472
ddlB	0.0728524	0.28862
metI	0.108466	0.28862
lsrG	0.316488	0.28862
gltX	0.0696107	0.28862
yahJ	-0.120703	0.288644
csgA	-0.181474	0.289039
ydjL	0.258167	0.292341
topB	-0.0768888	0.292679
frwA	-0.280949	0.2934
ffh	0.0689258	0.293516
betT	0.148424	0.294651
ydhW	-0.268637	0.294651
umpG	-0.0895412	0.294857
rarA	-0.0769252	0.294873
shoB	-0.282014	0.29503
rsmE	-0.10403	0.295172
ymfJ	0.198729	0.295482
acpH	0.151993	0.295868
yhbO	0.186896	0.296848
panD	0.0699964	0.297056
ackA	-0.0709389	0.297056
yegI	-0.183948	0.297074
msrB	0.196282	0.2976
ylcI	-0.232222	0.298207
pgaD	-0.31805	0.2983
ttcA	0.107673	0.299107
puuR	0.202945	0.299391
coaE	0.109014	0.299694
rclR	-0.26362	0.299694
yqcC	0.135433	0.300138
pabA	0.171678	0.30037
ytfE	0.171197	0.30037
prpR	0.253611	0.301052
ygcP	-0.316003	0.301052
rsmI	-0.114515	0.301052
yaiP	-0.245353	0.301459
zapD	0.1007	0.301473
tar	-0.278114	0.301473
kduD	-0.177997	0.301473
mscS	-0.0695373	0.301945
tatD	0.165183	0.302721
yfcD	-0.0836315	0.303097
waaF	0.0767881	0.303097
yjfF	0.24711	0.303097
modF	-0.10948	0.303364
wecA	-0.074724	0.303364
yjiP	-0.135265	0.303364
mukF	-0.0900718	0.305061
pyrG	0.0695747	0.305261
ykfI	-0.25515	0.305489
mdaB	0.111653	0.305572
fliY	-0.0673535	0.305625
yhfK	0.0825101	0.305625
renD	-0.332116	0.305625
yjhG	-0.117368	0.306997
yjiN	0.0990531	0.30826
yadS	0.187133	0.308693
yddH	0.175508	0.308693
ldtA	0.0843592	0.308693
yahN	-0.284549	0.309387
tehB	0.0877153	0.309651
rpoN	0.0667116	0.310638
cedA	0.17441	0.31088
gltF	-0.209309	0.31119
hemY	0.0689805	0.31119
mcrC	-0.247103	0.31119
rsmG	0.127896	0.312235
maa	-0.13853	0.314298
cydC	-0.0783285	0.315207
ycgG	0.227441	0.315207
yeeN	0.0708773	0.315207
feoA	0.0665582	0.315207
yncE	0.0742086	0.315351
ydbL	0.167586	0.315791
hscC	-0.202641	0.316361
nuoA	-0.0754192	0.316361
ygbT	-0.177754	0.316361
yhbS	-0.0799128	0.316361
dnaC	-0.11573	0.316361
ygcQ	-0.292354	0.319375
yjiC	-0.327814	0.319375
hyaD	0.0837615	0.319932
rbsC	0.117762	0.320507
alsK	-0.198442	0.320507
yoeH	-0.285342	0.321734
pgaA	-0.124385	0.322728
rimI	-0.144781	0.322866
ygeQ	-0.179635	0.322932
yafL	0.21472	0.323469
cmk	0.0680211	0.323586
yhfZ	-0.20377	0.323589
waaR	-0.109255	0.323589
ugpB	-0.256043	0.324108
ltaE	0.0704632	0.32467
ftsE	-0.0927704	0.32467
tatC	-0.0807388	0.32467
yjhF	-0.153211	0.32467
arcA	-0.0672704	0.32467
xisD	-0.214179	0.32467
ygaZ	0.0753913	0.325
minE	-0.0829603	0.325042
wbbI	-0.0855334	0.325042
yejM	-0.0707587	0.325042
ascF	-0.159418	0.326307
yrbN	-0.218377	0.326427
aroD	0.0852868	0.328462
ygeY	-0.320945	0.329447
livH	0.32412	0.329447
psd	-0.0667201	0.329447
idnD	-0.325584	0.329447
ydhI	-0.2144	0.329704
gluQ	-0.117589	0.329978
fhuC	-0.0694003	0.329978
uspA	-0.0668528	0.331593
stfR	0.168509	0.331845
thiP	-0.129642	0.332659
flgI	-0.315308	0.333829
crl	0.0806241	0.335786
afuC	-0.273449	0.336434
ompT	-0.0684718	0.336467
rluD	0.0726105	0.336467
emrA	0.104965	0.336467
rpsT	-0.0649937	0.337572
mak	-0.0848699	0.337572
emtA	0.0979178	0.337572
lsrA	-0.249326	0.337572
cspI	0.317717	0.337572
yoaF	0.174168	0.337572
[truncated: 1,624 more rows]

## Sheet: poor-5FU_S04 - log2 and pval
Gene name	log2FoldChange	FDR adj pval
flu	2.38856	6.90022e-169
cspA	1.35882	1.37588e-229
cyoE	-1.56352	5.48993e-143
aceF	-0.971453	2.61889e-135
cyoB	-1.43029	3.14548e-128
aceE	-0.913898	1.88781e-122
dtpA	0.929007	1.97998e-120
gatD	0.974812	1.02025e-118
mtr	0.892054	1.64861e-117
yjiY	-0.907711	5.67387e-107
gatC	0.817401	1.83314e-98
upp	-1.15628	8.81573e-97
lpd	-0.865569	2.59719e-96
cysP	-0.93199	6.05805e-93
rpsC	-0.761663	2.94834e-87
fdoG	-1.07027	2.09798e-82
putA	-1.14994	1.66884e-80
yeaD	1.00687	1.66884e-80
rplV	-0.780151	2.1729e-78
gadC	0.685715	4.51114e-77
cirA	-0.745269	8.31116e-77
cspE	0.703333	3.47234e-76
trpA	-0.777631	1.89584e-75
rplB	-0.710593	1.96132e-75
fbaA	0.680624	2.34595e-74
trpE	0.753785	3.37692e-72
rplP	-0.745611	4.57094e-72
gadB	0.644575	5.45948e-70
nmpC	-0.788923	1.58151e-69
fdoH	-1.52531	7.58488e-69
uraA	-2.21193	2.0138e-67
oppF	0.686673	2.99929e-67
cyoC	-1.71897	3.6839e-67
rpsS	-0.759492	1.29769e-66
cadA	-1.32658	2.72643e-64
rpmC	-0.754497	6.14846e-60
pgk	0.609967	2.34363e-58
rplD	-0.641524	1.36252e-57
cadB	-1.68073	5.2372e-57
rplC	-0.621473	3.2975e-56
rpsQ	-0.675887	6.32739e-56
rpsF	-0.637576	1.17403e-54
rplA	-0.602768	7.52254e-54
rplW	-0.680416	1.07461e-53
trpB	-0.640416	1.21007e-53
gatB	0.74621	2.05221e-53
oppD	0.612588	3.65912e-53
cyoA	-1.24514	4.65606e-53
rplI	-0.639634	1.52564e-52
gatA	0.648025	7.68663e-52
lpxP	0.951894	9.15362e-52
ilvG	-0.733411	1.51266e-51
purC	0.63887	1.94828e-51
gatZ	0.564267	7.41888e-51
cysA	-0.638937	1.07188e-50
cyoD	-1.72373	1.54042e-49
rpsJ	-0.601134	2.99333e-49
metE	0.635622	4.55633e-49
priB	-0.67797	1.59731e-47
hdhA	-0.641852	1.61661e-47
oppC	0.588003	2.04695e-47
evgS	0.697649	5.70073e-47
cysD	-0.642813	6.33789e-46
nadB	0.567437	6.55333e-46
cysU	-0.786194	8.00438e-46
oppB	0.580232	1.19515e-44
ompF	-0.569225	1.4845e-43
pyrC	0.63851	1.95106e-43
purA	-0.512647	2.02031e-43
ilvB	-0.766286	2.61346e-43
gatR	0.903951	8.22268e-42
rpsR	-0.657934	1.01934e-41
sdaC	-0.61458	1.15508e-41
iaaA	-0.60165	2.36931e-41
rpsI	-0.550893	2.6999e-41
dppA	0.548359	3.58784e-41
rplM	-0.551924	4.48672e-41
cysW	-0.690063	8.7578e-41
lysU	-0.593113	1.75778e-40
rplK	-0.558598	4.21617e-40
cysJ	-0.573737	4.22837e-40
cydB	-0.541377	6.22356e-40
mntH	0.53371	8.73958e-40
fruA	0.62747	1.29312e-38
fiu	-0.897799	1.33116e-38
grcA	-0.47633	2.16752e-38
phr	0.698581	5.14044e-38
glnH	-0.588513	1.19507e-37
osmY	-0.628432	1.21165e-35
gadA	0.460611	1.36567e-35
ydjN	-0.519401	1.18769e-34
rpmE	-0.522352	2.29834e-34
mdh	-0.571088	4.00298e-34
yeeR	1.35079	1.05154e-33
potD	-0.524307	5.00975e-33
fdoI	-1.02321	7.94946e-33
yjjZ	0.507246	1.71496e-32
serA	0.477804	2.12432e-32
rbbA	-0.788031	2.48166e-32
cydA	-0.464569	1.01102e-31
sodA	-0.620102	2.48316e-31
cysK	-0.447962	3.64383e-31
yciW	-0.696648	7.15125e-30
carA	0.642617	8.11984e-30
rseC	0.60911	1.89115e-29
aroH	0.523724	3.04547e-29
htpG	-0.507382	3.13624e-29
rplR	-0.481625	3.53384e-29
purM	0.490582	4.43332e-29
rplO	-0.444523	5.7861e-29
gapC	0.451895	2.72036e-28
adhE	0.405858	2.77741e-28
rpsE	-0.448656	4.23612e-28
pyrD	0.579373	4.05109e-27
icd	-0.450371	1.62181e-26
manZ	0.441181	2.15689e-26
purP	0.490817	2.92395e-26
groL	-0.419026	5.85147e-26
stpA	-0.660423	6.51024e-26
fecA	0.485621	7.38704e-26
fruK	0.686602	1.01729e-24
dppD	0.695142	1.03081e-24
rpoA	-0.386461	1.54344e-24
fecB	0.635855	2.72019e-24
fabA	-0.432842	3.39233e-24
ptsI	0.377867	5.35002e-24
pflB	0.373221	5.69747e-24
gsiA	-0.448385	1.56643e-23
pyrE	1.76591	2.98667e-23
hisG	-0.521474	3.33757e-23
glyA	0.380988	4.04171e-23
rplJ	-0.374222	1.22125e-22
ompA	-0.359966	1.90598e-22
cysN	-0.425311	2.76646e-22
cysI	-0.42402	3.50452e-22
rplF	-0.390992	7.86803e-22
hyaF	0.520223	7.92034e-22
rph	-0.742171	7.93959e-22
pyrB	0.47931	9.95854e-22
fruB	0.560392	2.14529e-21
thiH	-0.465874	2.70719e-21
thiC	-0.422855	2.70719e-21
secY	-0.357209	2.81518e-21
hisD	-0.464679	2.88986e-21
dnaK	-0.380033	3.74325e-21
slyD	0.384622	4.9363e-21
yeiE	0.55521	5.2547e-21
mdtF	0.386733	7.57022e-21
yifE	-0.443158	1.12319e-20
sdaB	-0.506596	1.20225e-20
avtA	0.47587	1.44495e-20
dppF	0.665536	1.51294e-20
gltD	0.399154	1.94983e-20
groS	-0.432794	2.86062e-20
rplL	-0.357408	3.09774e-20
bioF	-0.919755	3.31331e-20
manY	0.391085	3.92163e-20
purN	0.510946	4.26699e-20
rplE	-0.365707	5.08131e-20
thiG	-0.482859	5.26071e-20
oppA	0.339628	6.64376e-20
gatY	0.353064	7.22106e-20
yhiD	0.422586	9.10951e-20
ydiH	0.502362	1.06664e-19
yeeE	-0.450227	1.11085e-19
rpsH	-0.378206	1.54113e-19
pqqL	0.518866	2.23603e-19
rpsN	-0.38306	2.32239e-19
ydfZ	-0.394418	2.3805e-19
yebV	0.420052	2.48005e-19
yobF	0.386859	2.61319e-19
ynjE	-0.642232	2.66605e-19
ilvI	0.497361	3.49094e-19
bioB	-0.883917	3.64425e-19
pnuC	0.37412	4.26433e-19
pdxA	0.461073	4.78624e-19
xseA	0.456505	7.52166e-19
manX	0.367264	8.60685e-19
ygdH	0.388192	1.23871e-18
dhaM	0.424762	1.28262e-18
rplQ	-0.360481	1.47551e-18
hisB	-0.444122	1.55463e-18
moaB	-0.521087	3.78057e-18
yqfA	0.392914	3.84094e-18
rpsD	-0.341342	4.64904e-18
hisC	-0.43855	5.45875e-18
clpB	-0.367471	5.45875e-18
purL	0.353575	7.58686e-18
artI	-0.406996	8.3445e-18
iraP	-0.628806	8.54192e-18
pykF	0.34312	8.79143e-18
borD	-0.692661	1.05444e-17
elbB	-0.481997	1.31551e-17
livJ	0.850332	1.73917e-17
trpD	0.368655	2.94049e-17
rhtC	0.477443	3.38084e-17
dppB	0.639132	4.72406e-17
thiF	-0.463174	7.81718e-17
rplS	-0.355262	1.16604e-16
rpsK	-0.343825	1.18086e-16
guaB	0.3937	1.58568e-16
yidA	0.41712	1.6217e-16
fimB	-0.583901	1.63093e-16
shiA	0.382245	1.99268e-16
yfcC	-0.581563	2.08005e-16
rplY	-0.35302	2.51384e-16
udp	-0.360674	3.28332e-16
trpL	0.942143	5.33681e-16
ompC	-0.301595	5.83365e-16
copA	0.35142	6.50317e-16
asnB	-0.313884	7.04768e-16
ompT	-0.323165	8.8118e-16
rpsM	-0.328255	1.00874e-15
thiE	-0.450936	1.27485e-15
hycC	1.21108	1.34721e-15
yhbW	0.618636	1.52137e-15
proP	0.351119	1.80358e-15
cspC	0.323952	2.91115e-15
rapA	-0.394532	4.00054e-15
rmf	0.322507	4.16157e-15
potA	-0.470317	4.55092e-15
gpsA	0.351982	4.80604e-15
uspG	-0.387939	5.2571e-15
ycbL	0.354385	8.52759e-15
rpmD	-0.396434	8.81367e-15
trmD	-0.315986	9.12083e-15
tsx	-0.400667	9.78865e-15
dppC	0.588255	1.10799e-14
ygaM	0.340624	1.24907e-14
rluB	-0.496004	1.25376e-14
ptsG	0.30222	1.28162e-14
bglJ	0.427243	1.49144e-14
rimM	-0.326487	1.66788e-14
narG	-0.351708	1.93656e-14
ybjX	-0.368065	1.93682e-14
fhuB	0.364692	2.42017e-14
ptsH	0.306401	2.69584e-14
gapA	0.284149	2.81766e-14
apbE	-0.704665	3.07785e-14
ppsA	-0.43715	3.12751e-14
rplX	-0.323599	3.29736e-14
purK	0.356536	3.805e-14
fecR	0.341112	3.80758e-14
pnp	0.307234	3.92999e-14
aspC	0.348027	4.5388e-14
ynfK	-0.355673	4.5898e-14
gabT	0.401679	4.5898e-14
cspB	0.635213	5.06758e-14
ydaM	0.441158	6.06324e-14
hdeD	0.300028	6.4432e-14
yceD	-0.315239	9.32859e-14
katG	-0.328355	1.0233e-13
fabF	0.311355	1.26112e-13
alaA	0.344693	1.65306e-13
rpoS	-0.316743	1.76513e-13
aldB	0.574823	1.94644e-13
wecC	0.409042	2.10623e-13
rpsO	-0.317521	2.30656e-13
rseB	0.336458	2.87257e-13
hyaA	0.419202	3.52855e-13
bssR	-0.347679	4.4267e-13
hisJ	-0.553259	4.70812e-13
crr	0.285985	5.64076e-13
adiY	-0.626165	5.93267e-13
nadA	0.291576	6.49435e-13
mreC	0.360282	6.56834e-13
ybgS	-0.530764	1.0081e-12
ybgA	0.475134	1.1177e-12
eco	-0.425524	1.16825e-12
patA	0.372552	1.76843e-12
rpmH	-0.320331	1.91715e-12
hyaB	0.364367	1.983e-12
rhsC	0.502314	2.16758e-12
gmr	-0.395455	2.74107e-12
alaE	-0.679427	2.94484e-12
fdhF	0.360986	3.0903e-12
purT	0.364931	3.8912e-12
hybO	-0.491074	4.371e-12
ybgE	-0.412614	4.77628e-12
ypeC	0.40763	5.60726e-12
rplU	-0.290783	6.18324e-12
yhhJ	-0.643545	6.20049e-12
yjdM	-0.387485	6.77712e-12
tpiA	0.274112	6.83131e-12
yigL	0.449815	6.84363e-12
cvrA	0.40645	7.13061e-12
apt	-0.334612	8.16614e-12
uvrC	0.315236	8.61129e-12
sfsA	0.384886	8.93186e-12
yjcD	0.364064	8.93186e-12
bioA	-0.627557	9.86552e-12
serC	0.280666	1.0771e-11
sstT	0.30926	1.08277e-11
pagP	0.475158	1.08719e-11
tatE	0.331702	1.1342e-11
ydcF	-0.468662	1.43143e-11
apaH	0.375179	1.4384e-11
rffG	0.401111	1.45238e-11
fabB	0.270153	1.78621e-11
folD	0.31245	2.01848e-11
yjjJ	-0.472439	2.14723e-11
rsmA	0.340455	2.16783e-11
gltB	0.266151	2.62818e-11
yciU	0.418779	2.78061e-11
greA	-0.345316	3.09653e-11
bioC	-0.970891	3.57885e-11
entB	-0.289585	6.45974e-11
argC	-0.487016	7.16102e-11
yedE	-0.663091	8.75125e-11
rpmF	-0.276863	8.86639e-11
nfo	-0.37987	9.57374e-11
ycbK	0.301002	9.58064e-11
fecE	0.536378	1.2114e-10
uspD	-0.332343	1.43104e-10
ynfH	0.425331	1.44324e-10
patD	0.501774	1.57211e-10
ggt	0.293298	1.9382e-10
yhbU	-0.402973	1.99127e-10
rpsP	-0.283642	3.46862e-10
opgB	-0.395881	4.09055e-10
rpsL	-0.253905	4.20492e-10
yghJ	-0.332297	4.21831e-10
entC	-0.280781	4.6823e-10
pepB	0.348578	4.7775e-10
moaC	-0.468376	4.83358e-10
rpmA	-0.272002	5.14533e-10
fecI	0.279939	7.56588e-10
ydcY	-0.374567	9.03379e-10
tpx	-0.271236	1.01689e-09
yeaJ	-0.604841	1.077e-09
menE	0.372336	1.21545e-09
ompX	-0.23872	1.24735e-09
yecA	0.30588	1.24735e-09
yhiI	-0.441083	1.31054e-09
nlpA	-0.323281	1.33776e-09
ilvL	-0.381091	1.35908e-09
artP	-0.305745	1.37274e-09
hyaD	0.349073	1.66749e-09
elaB	0.254462	1.6823e-09
ymdF	0.425482	1.83177e-09
cydX	-0.550825	1.83602e-09
ybhC	-0.314495	1.86587e-09
ndh	-0.285364	1.96291e-09
hycA	1.21141	1.9743e-09
rplN	-0.24026	2.23717e-09
purU	0.295875	2.39162e-09
sdaA	-0.29168	2.39162e-09
dmsD	0.398549	2.45349e-09
nlpI	0.260429	2.62963e-09
yceK	-0.32227	2.67237e-09
menF	0.319818	2.8654e-09
leuL	0.478128	2.95345e-09
purH	0.286375	3.15871e-09
rpsG	-0.244347	3.34721e-09
hisH	-0.367013	3.35362e-09
bcsG	0.323734	3.63609e-09
ilvN	-0.783659	4.07837e-09
yobD	0.706744	4.12237e-09
dusB	-0.270628	5.97191e-09
bfd	0.308764	6.04898e-09
rffH	0.360809	6.62233e-09
trmI	-0.34548	6.87043e-09
asd	0.243421	7.15687e-09
gpp	0.274002	8.15278e-09
mipA	-0.269211	8.58272e-09
recB	0.296428	9.52488e-09
exbB	0.23965	9.91574e-09
fecC	0.530963	1.00628e-08
dnaE	0.265222	1.16932e-08
intF	-0.382296	1.29925e-08
mdtE	0.266351	1.31452e-08
purD	0.28465	1.41742e-08
entA	-0.254866	1.61137e-08
uspA	-0.238509	1.67681e-08
yfgD	0.296064	1.67837e-08
zitB	0.308809	1.70248e-08
narL	-0.344569	1.75702e-08
yhcC	-0.515945	2.07872e-08
nudK	0.420952	2.0931e-08
ptsP	0.264087	2.24664e-08
hisI	-0.292356	2.39361e-08
pal	-0.244008	2.40991e-08
curA	0.325074	2.42305e-08
yneM	-0.539281	2.52257e-08
envC	0.314305	2.57029e-08
entE	-0.247312	2.94728e-08
msyB	-0.27618	3.07142e-08
ilvC	-0.321412	3.20682e-08
dhaL	0.326658	3.67554e-08
argA	-0.431211	3.75142e-08
srmB	-0.323904	3.95925e-08
yhhX	0.272907	4.07508e-08
appY	-0.273665	4.13603e-08
ypfJ	0.283	4.30772e-08
yhdV	0.689522	4.32321e-08
hycB	1.33924	5.38349e-08
rpmB	-0.234837	5.48226e-08
ghrA	-0.289539	6.28488e-08
sufS	0.283539	6.45881e-08
fhuE	-0.242097	6.63834e-08
exbD	0.24329	6.81651e-08
glnA	0.240786	6.95281e-08
aidB	0.24469	7.00265e-08
nirB	-0.313129	7.26467e-08
murC	0.25375	7.83244e-08
mppA	-0.32549	8.15051e-08
fbaB	0.231922	8.95666e-08
fadR	0.300512	9.67065e-08
ydbA	-0.288649	9.76968e-08
pdxY	0.352042	1.00048e-07
fusA	-0.204453	1.02976e-07
skp	0.22958	1.0341e-07
yahK	0.253025	1.10738e-07
nagK	0.278199	1.10738e-07
hdeA	0.203879	1.1375e-07
fhuA	-0.218245	1.27399e-07
apaG	0.385173	1.46754e-07
rng	0.276042	1.53291e-07
ybaT	0.249524	1.53888e-07
ybhB	0.318159	1.60877e-07
intZ	0.369361	1.62631e-07
aroL	0.312973	1.67702e-07
gdhA	0.239897	1.70379e-07
tufB	-0.203128	1.81227e-07
yhfA	0.270949	1.91491e-07
ybiX	-0.576581	1.94864e-07
fkpA	0.238308	1.99745e-07
rho	0.220095	2.1264e-07
tsf	-0.218791	2.16439e-07
yecF	-0.524583	2.18264e-07
guaC	-0.24404	2.41722e-07
tktB	0.22404	2.45704e-07
ycaO	-0.30504	2.4883e-07
epd	0.220991	2.49416e-07
yqeI	0.41712	2.50601e-07
bamC	0.226097	2.5182e-07
yccU	0.261009	2.54225e-07
mnmG	-0.264937	2.69468e-07
dhaK	0.255786	2.74171e-07
pepA	-0.229206	2.75049e-07
metF	0.525051	3.14556e-07
hmp	-0.515614	3.18e-07
pstB	-0.442242	3.23845e-07
hisA	-0.285571	3.40988e-07
narX	-0.335788	3.41541e-07
hydN	0.84466	3.49443e-07
brnQ	0.257595	3.58014e-07
rspR	0.296443	3.91057e-07
yegE	0.350757	4.55651e-07
fadL	-0.518718	4.99291e-07
fucU	-0.573785	5.03463e-07
cysC	-0.323575	5.04421e-07
ahpF	-0.226638	5.22457e-07
malQ	0.262744	5.56392e-07
eutB	0.250291	5.60849e-07
fdnG	-0.383149	6.28012e-07
hns	-0.201545	6.31544e-07
yddB	0.292969	7.16499e-07
purE	0.256059	7.75973e-07
argH	-0.26876	8.012e-07
yhdE	0.337889	8.08095e-07
rpsB	-0.198799	8.09405e-07
dosC	-0.383536	8.50566e-07
ybjD	-0.325016	8.55796e-07
tmcA	0.277159	8.96966e-07
tktA	0.218112	8.98306e-07
yfjW	0.492718	9.61106e-07
ridA	-0.227301	9.93686e-07
dbpA	0.342523	9.98109e-07
mscS	-0.212196	1.07409e-06
yjiT	-0.338405	1.14223e-06
mntS	0.33922	1.15811e-06
glk	0.261314	1.15811e-06
yhhS	0.398975	1.16015e-06
ampG	0.335933	1.18061e-06
ybaY	-0.263516	1.20428e-06
yahA	-0.566449	1.29214e-06
argB	-0.3623	1.29214e-06
ydhR	-0.276441	1.36533e-06
bioD	-0.708713	1.37552e-06
yibT	-0.336577	1.40582e-06
cpdB	-0.293073	1.44385e-06
bhsA	-0.832495	1.44519e-06
rimO	-0.394954	1.47227e-06
thiL	-0.331977	1.57531e-06
hyaC	0.306102	1.59657e-06
nrdA	-0.236021	1.63654e-06
mdtK	-0.293253	1.64863e-06
ydgH	0.242735	1.64959e-06
cysB	-0.254649	1.65227e-06
yigA	0.309776	1.666e-06
yciI	0.24013	1.68552e-06
tyrB	0.239503	1.68552e-06
yghE	-0.339875	1.69237e-06
accC	0.216631	1.7569e-06
murG	0.242981	1.80912e-06
waaC	0.300419	1.90354e-06
phoA	-0.418789	2.03036e-06
ypfH	0.314542	2.04895e-06
yegQ	-0.303113	2.12337e-06
typA	0.200664	2.14369e-06
pspA	-0.383268	2.20887e-06
raiA	-0.206327	2.30313e-06
mreD	0.37996	2.5143e-06
yaiA	0.316943	2.56048e-06
lpxH	0.345452	2.58099e-06
kdpD	-0.297028	2.70169e-06
yegD	-0.479073	2.81583e-06
dcuC	-0.235281	2.94441e-06
rpmI	-0.207532	3.04675e-06
dctR	0.278281	3.13438e-06
cycA	0.26611	3.16967e-06
pliG	-0.37761	3.17247e-06
envZ	0.278145	3.1883e-06
ybcH	-0.620145	3.21013e-06
ftnA	-0.535717	3.64061e-06
ppc	0.190995	3.88383e-06
yhiM	0.228428	4.35518e-06
nrdB	-0.256926	4.39185e-06
nusB	0.253236	4.44034e-06
fimA	-0.188551	4.67456e-06
fhuF	0.19264	4.79956e-06
mepM	0.260347	5.00381e-06
rpmJ	-0.211889	5.13502e-06
uspF	-0.31523	5.26054e-06
ilvH	0.435503	5.92133e-06
lolE	0.236964	6.0676e-06
yiiM	0.346585	6.09396e-06
gcvT	-0.201977	6.56709e-06
nemA	0.262751	6.87259e-06
ubiF	0.288691	6.98909e-06
mraY	0.240936	7.03497e-06
gtrS	0.330901	7.20181e-06
hycE	0.684424	7.20181e-06
mnmC	0.265204	7.49991e-06
panD	0.218378	7.52757e-06
yjgA	-0.241598	7.54251e-06
dhaR	-0.345285	7.63145e-06
yjbR	0.268245	7.83386e-06
mltD	0.205019	7.92738e-06
fau	0.366604	8.04856e-06
gsiD	0.336831	8.10027e-06
nrdH	-0.282039	8.62174e-06
miaB	-0.248586	8.84676e-06
pyrH	0.243199	9.04071e-06
mtlD	-0.223988	9.04071e-06
fecD	0.463213	9.04071e-06
menC	0.232679	9.37281e-06
ybaA	0.500744	9.9524e-06
intA	-0.270865	1.00872e-05
glmS	-0.192911	1.01181e-05
sucC	-0.235949	1.02439e-05
epmC	0.334599	1.07098e-05
gabD	0.245451	1.11168e-05
iclR	0.280159	1.11168e-05
entH	-0.217228	1.12402e-05
evgA	0.233904	1.12527e-05
argG	-0.21645	1.14342e-05
yibQ	0.365733	1.17995e-05
plsB	0.201572	1.20114e-05
yceI	-0.741856	1.30361e-05
galM	-0.204725	1.39266e-05
bglA	0.210459	1.51372e-05
nanM	-0.423829	1.55589e-05
topA	-0.194973	1.56255e-05
mrr	-0.327276	1.58954e-05
osmE	-0.194884	1.61497e-05
yohC	0.351025	1.67367e-05
pbpC	0.371062	1.67367e-05
pepD	0.183422	1.73417e-05
gnd	0.180657	1.74185e-05
tnaA	-0.566164	1.79207e-05
yicC	0.220739	1.92968e-05
pyrF	0.340785	1.93707e-05
rnd	0.298562	1.96544e-05
yrdA	0.25159	2.14149e-05
nlpC	-0.267681	2.19451e-05
rssA	0.223178	2.2392e-05
sufE	0.377622	2.27136e-05
tolA	0.221063	2.28176e-05
rppH	0.216514	2.528e-05
cbl	-0.440611	2.57637e-05
wzxE	0.309804	2.58991e-05
dxs	0.223574	2.63194e-05
mrcA	0.308584	2.63348e-05
rpmG	-0.229261	2.7063e-05
argF	-0.278186	2.77083e-05
grxB	0.197926	2.77083e-05
eno	0.164945	3.00821e-05
sohB	0.208155	3.10482e-05
queE	0.376456	3.1387e-05
yfbS	0.268821	3.17443e-05
yncL	-0.344635	3.29918e-05
glsA	0.233421	3.31275e-05
yodC	0.45072	3.33196e-05
yeeD	-0.256021	3.36119e-05
trmN	0.370317	3.38835e-05
glnS	0.196871	3.44317e-05
yaiE	0.211107	3.53888e-05
ybiT	-0.202882	3.76188e-05
nfsA	-0.330252	3.76893e-05
roxA	0.20059	3.77312e-05
prc	0.18401	3.77312e-05
arnB	-0.389864	3.80225e-05
ffh	0.190151	3.83227e-05
yaeH	-0.21021	4.00385e-05
dksA	-0.186492	4.15492e-05
ydeP	-0.47973	4.28866e-05
dcp	-0.213248	4.42023e-05
yqeJ	0.786352	4.48887e-05
thiS	-0.559477	4.51421e-05
artJ	-0.279082	4.60626e-05
narY	0.519531	4.69757e-05
speE	-0.235899	4.76131e-05
fepA	-0.177199	4.77485e-05
gpr	0.304335	5.01973e-05
yggL	-0.216181	5.21532e-05
dcrB	0.21277	5.25498e-05
ddlA	-0.19384	5.56793e-05
ydbJ	0.26716	5.7808e-05
ydiJ	0.187553	5.90314e-05
ydjY	-0.686799	5.94713e-05
gpt	0.285804	6.38265e-05
rep	-0.25478	6.42836e-05
ydiP	-0.496195	6.50474e-05
ilvD	0.256166	6.76754e-05
yjdI	0.4765	6.89093e-05
surA	0.18414	7.19681e-05
hisF	-0.228983	7.19681e-05
lexA	0.208148	7.39056e-05
dacC	-0.19851	7.65257e-05
wecD	0.383629	7.77901e-05
cobB	0.228811	8.27826e-05
recD	0.268882	8.40812e-05
ribE	0.206931	8.41323e-05
fis	-0.24177	8.41323e-05
hycD	1.00464	8.56141e-05
yfiR	0.337352	8.66683e-05
mscL	-0.203778	8.81685e-05
yfcA	0.30525	8.9837e-05
bamB	0.182083	9.09526e-05
lhr	0.224561	9.21569e-05
yiiS	-0.228965	9.24863e-05
ycfL	-0.243689	9.3357e-05
hinT	-0.207421	9.4757e-05
otsB	0.206823	9.4757e-05
trpS	0.192316	9.54198e-05
bcsB	0.405716	0.000100471
yihA	0.213216	0.000100471
yejF	0.257718	0.000102446
sucA	-0.206065	0.000103733
ftsW	0.217412	0.000104796
waaF	0.211715	0.000105208
xerC	0.231976	0.000105208
thrA	-0.182593	0.000107335
yhjC	-0.530299	0.000107367
cstA	-0.202449	0.000110722
cbdB	0.181621	0.000112467
ynfG	0.376909	0.000112467
fdhE	-0.234831	0.00011759
hchA	-0.189033	0.000120779
lepB	0.199015	0.000124166
recG	0.216508	0.000124355
yghA	-0.292933	0.000127694
sodB	-0.276455	0.000134232
sixA	-0.223869	0.000138163
folX	-0.291255	0.000138875
ribB	-0.189383	0.000140007
menB	0.204062	0.00014055
ybhS	0.304293	0.000147108
yciE	-0.569773	0.000149486
glpT	-0.502262	0.000150293
wecE	0.230308	0.0001641
ushA	-0.194207	0.000164746
gss	0.176763	0.000168091
yhaL	-0.348187	0.000168091
ylaC	-0.353888	0.000169955
opgH	0.176719	0.000170607
ftsA	0.188419	0.000174416
wecB	0.227069	0.000174416
rpsA	0.150782	0.000176801
pgi	0.159903	0.000183374
cysM	-0.183567	0.000196345
yjeH	0.335632	0.000197923
oxyR	0.189974	0.000205405
dapA	0.165395	0.000206225
ybhR	0.344751	0.000208729
hscA	0.183991	0.000210929
hflC	0.172775	0.000211682
aroG	0.175071	0.000213518
nhaB	-0.205724	0.00022551
metQ	-0.183811	0.000236583
waaL	0.26013	0.000241851
yhjA	-0.356415	0.000247317
phoU	-0.292288	0.000257051
birA	0.268264	0.000260728
yceB	0.241828	0.00027164
ravA	-0.190659	0.000273254
sdhB	-0.453526	0.000284186
prmC	0.283571	0.000291812
csrA	0.169547	0.000298259
yghG	-0.852271	0.000303127
ilvA	0.241297	0.000303627
yejE	0.366855	0.000305875
yebT	0.200589	0.000310777
serB	-0.237545	0.000319275
csiE	-0.279756	0.000321923
nfrA	-0.290002	0.000321946
pepN	0.170743	0.000324209
dapE	-0.222543	0.000333291
yicH	-0.193855	0.000344386
mepS	0.166837	0.000345066
yfgG	0.283541	0.000357172
araC	-0.330574	0.000360351
rluA	-0.294934	0.000368372
cbdA	0.163805	0.000368831
blr	-0.261584	0.000371536
moaE	-0.270499	0.000380677
recF	0.315146	0.000383033
ypfG	0.376777	0.000400496
glgP	0.164473	0.000403308
yajO	0.178827	0.000417457
gadX	0.164276	0.000426176
yjeM	-0.487613	0.000426176
pgpA	0.223432	0.00043952
inaA	0.293758	0.00043952
ymdB	0.27383	0.000451235
yghX	0.353738	0.000451235
rhlB	0.162474	0.000451583
ccmF	0.313681	0.000452673
ybjM	0.229135	0.000457058
ydgK	-0.251345	0.000459481
ynfE	-0.190079	0.00046276
hemD	0.226019	0.000472581
yagI	-0.300084	0.000477802
ansB	0.194307	0.000481259
ydjO	-0.638367	0.000481635
sdhA	-0.523	0.000482275
gor	0.176207	0.000482275
hipA	-0.368321	0.000485259
proB	-0.168264	0.000490464
sseB	0.280749	0.000494422
adhP	0.184861	0.000505505
ybhF	0.195541	0.000512527
ada	-0.318665	0.000531642
thrC	-0.177514	0.000538515
ycaM	-0.512651	0.000568368
clsC	0.261321	0.000569759
murI	0.251302	0.000570046
ybiJ	-0.454753	0.000570646
murR	-0.53729	0.000571404
holD	-0.363767	0.000589456
yiaG	-0.187967	0.000589906
ychN	0.218313	0.000592239
leuE	-0.346762	0.00060325
yoeA	-0.215027	0.000613748
asnA	-0.141931	0.000616561
yehE	-0.223885	0.000619532
pepT	-0.163467	0.000622396
anmK	0.280234	0.000630493
yqhD	-0.214045	0.000658878
cspD	-0.166001	0.000659359
efeO	-0.296315	0.000665363
pheA	-0.16302	0.000691133
znuA	0.22291	0.000694196
nikA	-0.447474	0.000694196
yfcL	0.342427	0.000696422
phoP	-0.190366	0.000706058
hyaE	0.28991	0.000712628
purB	0.169085	0.000727453
yccA	0.155655	0.00073162
mgtA	-0.214141	0.00073162
ydcV	0.629939	0.000737041
frdA	-0.159564	0.000742777
adk	0.159662	0.000765466
mdlB	0.26472	0.000769453
ptrA	0.198702	0.000770571
yghU	0.17406	0.000771289
yeaP	0.214561	0.000779795
crfC	-0.339084	0.000790232
yeaQ	0.160745	0.000803336
cdsA	0.201975	0.000804051
hsdR	-0.215627	0.000813611
sdiA	-0.248007	0.00081934
lspA	0.187857	0.000839078
truB	-0.201753	0.000846954
slp	-0.144544	0.000852552
ahr	0.168669	0.000852552
entS	-0.192602	0.000857002
ybjP	-0.172919	0.000869443
yhjY	-0.196388	0.000876393
yciF	-0.603206	0.000876761
eptC	0.1913	0.000908395
hflK	0.151548	0.000926265
mlrA	0.265675	0.000937297
prfB	-0.155746	0.000953302
mtlA	-0.179023	0.000953717
yohD	0.257159	0.000965412
narI	0.257132	0.000995436
ubiI	0.198441	0.00103336
yhhT	0.309544	0.00106025
btuF	0.352984	0.0010851
yhfK	0.196162	0.0011025
lpxK	0.233747	0.00110547
pncB	0.150949	0.00111354
uvrA	0.159046	0.00111416
yhaJ	0.219986	0.00114906
fabH	0.166639	0.00115336
yaiL	0.223694	0.00115709
mdtJ	-0.765052	0.00118865
yijE	0.382537	0.00119114
narZ	0.261035	0.00119666
potC	-0.310438	0.00120282
trkA	0.182501	0.00120952
csgD	-0.226857	0.00121085
mug	0.194918	0.00121671
mutS	-0.183631	0.0012543
pstA	-0.337347	0.0012769
folC	0.20867	0.00128498
glpA	-0.56417	0.00140045
ypdA	0.223385	0.00140045
lysP	0.186879	0.00140402
glnL	0.250596	0.00140663
pdxJ	-0.170777	0.00142865
mutT	0.439161	0.0014401
yfiB	0.349176	0.00145086
thrB	-0.173546	0.00147391
sucB	-0.164567	0.00149493
dkgA	0.176377	0.00149849
hemC	0.164658	0.00156652
plaP	-0.220978	0.00157164
tdh	-0.159907	0.00161276
yeiP	-0.225402	0.0016164
aceK	0.180748	0.00162623
gnsB	-0.219498	0.00162686
yjiA	-0.218857	0.00162686
nadC	0.19815	0.00166931
amiD	-0.192108	0.00171301
accB	0.161742	0.00172395
yddE	0.230011	0.00175547
bamA	0.138449	0.00176385
spy	-0.383983	0.00176385
malP	0.180751	0.00176578
acuI	0.169085	0.00181393
rplT	-0.136799	0.00184183
ychJ	0.200589	0.00188788
arnC	-0.396864	0.00191615
dapF	0.188283	0.00191615
pmbA	0.164468	0.00192166
galR	0.228515	0.00196696
yfiH	0.209805	0.00197924
thiB	-0.210147	0.00201773
sbp	-0.344203	0.00203235
cueR	0.192327	0.00205348
cobC	0.354343	0.00210241
nadE	0.146764	0.00211908
nagB	0.179187	0.00211987
csrD	-0.166849	0.00212989
ompW	-0.27705	0.0022332
ydhP	0.355415	0.0022332
gmhB	0.199515	0.00224008
ampE	0.222245	0.00227386
pheP	-0.243327	0.00227624
emrB	0.256411	0.00227624
emrD	-0.314648	0.00227624
iscR	0.156716	0.00227986
hisS	0.145052	0.0023534
uhpA	-0.2379	0.0023534
gcd	-0.263428	0.00236477
ftsH	0.131841	0.00242491
rihA	0.275836	0.00247814
murD	0.161498	0.00249443
rcsC	0.164304	0.00250449
ybiB	-0.171323	0.00252521
yraR	0.362656	0.00252667
btuC	0.254268	0.00253914
epmA	-0.304235	0.00254851
selD	-0.157428	0.00256667
thyA	0.177053	0.00262298
ygiM	-0.167248	0.00268082
can	0.163573	0.00269481
ulaR	-0.327896	0.00276598
menH	0.402053	0.0027756
yeeS	0.671812	0.00280033
gsiB	-0.152494	0.00284561
rpoH	-0.143508	0.00295584
ybjG	-0.270354	0.00305613
galP	0.192915	0.00306387
rsmJ	-0.20948	0.00308554
yafD	0.165738	0.00309631
yhcO	0.29191	0.00317577
treB	-0.38203	0.00319825
talA	0.144395	0.00319865
yciH	0.516715	0.00321014
yqaE	-0.22775	0.00321859
dmsC	0.228834	0.00322309
eda	0.152855	0.00325314
cohE	-0.223122	0.00332278
alaS	0.128511	0.00335455
purF	0.160617	0.00338735
lolB	0.186971	0.00343605
sppA	0.15949	0.00345678
metG	-0.143001	0.0034866
yfiN	0.310134	0.0034866
yeiB	0.28608	0.00352187
speD	-0.180936	0.00352488
deoD	-0.14393	0.00365518
yjjW	0.264204	0.00366785
alr	0.182842	0.00370545
fklB	0.161442	0.00371908
amyA	0.144937	0.0037563
ybiR	0.386209	0.00379965
yjdN	0.302659	0.00381318
yneG	0.343874	0.00392611
rstA	-0.19432	0.00402122
yghF	-0.702676	0.00402917
yjiX	-0.354803	0.0040434
yffR	-0.313591	0.00405869
pstS	-0.289142	0.00408366
yfeH	0.213691	0.00413186
fdx	0.274756	0.00414089
ybhG	0.189289	0.00415112
yffB	-0.307464	0.00417349
aroE	0.226384	0.00419009
yigB	0.208302	0.00419727
glgA	0.139871	0.00428077
endA	-0.520543	0.00439515
uvrY	0.144669	0.00439627
betA	-0.389748	0.00455523
yncD	0.356243	0.00457139
yihW	-0.255593	0.00461789
lplT	0.214731	0.00466813
aceB	0.130953	0.00468921
fliC	-0.192407	0.00470938
prs	0.135006	0.0047393
ygjR	0.176719	0.0047393
tsgA	-0.202755	0.0047393
yahM	-0.492299	0.00475415
sucD	-0.172621	0.00475415
yidB	-0.285374	0.00482141
lldD	-0.381708	0.00484812
narJ	0.262898	0.00485228
infA	0.147052	0.00488538
pheL	-0.432244	0.00488538
livK	0.447876	0.0049058
pssA	-0.14303	0.00495373
yeeO	0.249891	0.00501683
ssb	0.145281	0.00509239
mfd	0.140099	0.00516256
bamD	0.13466	0.0052171
mnmH	0.310141	0.00521873
hemE	0.146767	0.00521873
ispE	0.142755	0.00526174
narV	0.528897	0.00531218
yeaE	0.227709	0.00545647
mraZ	-0.168278	0.00553054
osmF	-0.165517	0.0055607
parE	0.142391	0.0056019
ispU	0.162427	0.00562953
nadD	0.240349	0.00565366
argS	-0.149438	0.00569837
tdk	-0.25813	0.00569903
prfA	0.157659	0.00570058
yhhN	0.187324	0.00577367
yqhA	-0.276971	0.00596248
yagU	-0.140246	0.00600734
dapB	0.161477	0.0060603
feoC	0.147308	0.0060603
dtpB	-0.224029	0.00609512
glpK	-0.21229	0.00621998
cytR	0.210006	0.00623492
ydiU	0.220559	0.00628988
yicG	-0.529646	0.00637774
rlmE	0.136508	0.00641052
aegA	-0.242801	0.00641382
pta	0.125119	0.00650498
creA	-0.293173	0.0065767
galK	-0.16186	0.00681546
narP	-0.221564	0.00694716
gyrB	0.131512	0.00695873
deoC	-0.158159	0.007006
ycaQ	0.327024	0.0070514
trxA	-0.12993	0.0070514
lgt	0.199275	0.00706484
wrbA	0.126865	0.00708082
cmoA	-0.215558	0.00715182
agp	0.152877	0.00724082
speG	-0.199009	0.0074268
artQ	-0.1611	0.00742778
yccJ	0.14102	0.00742778
pfkB	0.140077	0.00742981
mpaA	0.171744	0.00747082
yehX	0.289982	0.00747082
glnG	0.193888	0.0074787
yfaY	0.148055	0.00760985
ybbA	0.262787	0.00761056
yeaK	-0.181441	0.00761937
arpA	0.555714	0.00762543
yeiI	-0.19546	0.00772526
yqjI	-0.213387	0.00779316
yhdP	0.146	0.00779316
narW	0.568456	0.00786897
ybcJ	0.312658	0.00788328
yfcH	-0.158898	0.00795712
proS	0.126606	0.00797112
focA	0.123053	0.00807246
ydgJ	0.151083	0.00810707
ybbP	0.18749	0.00820684
alkA	0.252917	0.00820684
yfbT	0.136594	0.00824248
rbfA	-0.202984	0.00836517
yciN	-0.15805	0.00837944
rsmB	0.151344	0.00843446
torD	0.274954	0.00854217
fnr	0.133201	0.00854217
ydiZ	0.170564	0.00860894
mrp	0.158613	0.00860894
mdtH	0.286441	0.00872464
kdsA	0.134258	0.00872668
poxB	0.128737	0.00878957
sodC	0.172854	0.00878957
yohP	0.280515	0.00878957
yoaC	-0.200155	0.00880686
acrZ	0.192071	0.00884868
menI	0.241097	0.00900843
ycaN	-0.351504	0.00901848
tfaE	-0.823959	0.00905434
lolC	0.153436	0.00905638
chaA	-0.240331	0.00911684
carB	0.13326	0.00917377
osmB	-0.147938	0.00917631
ynfF	0.145796	0.00933571
ygeV	-0.295473	0.009356
yhjD	0.171571	0.00937233
dnaG	-0.137471	0.00948398
kefC	0.182393	0.00956703
betB	-0.289845	0.00956703
hpt	0.144539	0.00963683
selB	0.145363	0.00964348
fimE	-0.494735	0.00976873
rtn	0.217555	0.00990747
rimJ	-0.162471	0.00992499
yhbJ	0.14101	0.0105876
speC	0.197835	0.0106024
ftsQ	0.14346	0.0106247
eptB	0.199884	0.0106247
gcvH	-0.143156	0.0106558
ydhK	0.248762	0.0108935
atpB	-0.124024	0.0111773
ygdR	0.211777	0.0112993
yebB	-0.79246	0.011443
yihX	-0.178787	0.0115789
yjgX	0.231721	0.0116734
insP	0.317941	0.0116754
yojI	-0.171579	0.0117364
hemX	0.141629	0.0118903
wcaN	0.122647	0.0119115
dusC	-0.361976	0.0120639
yjiM	-0.259956	0.0120862
gabP	0.277299	0.0121054
tas	0.12943	0.0122044
npr	0.291086	0.0122999
trxB	-0.135342	0.0124311
yfiF	-0.133681	0.0124801
murJ	-0.210249	0.0126634
pfkA	0.108473	0.0127309
yjbD	0.186113	0.0128731
infB	-0.114503	0.0131509
gltA	-0.148878	0.0132279
slt	-0.133897	0.0132279
clpX	0.112244	0.0132769
iscX	0.257305	0.0135263
intS	-0.294463	0.0138112
nsrR	0.238807	0.0138112
ftnB	-0.181794	0.0138897
yniC	-0.186036	0.0141201
ynjB	-0.232387	0.0141201
ybaV	-0.490204	0.0143951
idnD	-0.681551	0.0146052
cheA	-0.480566	0.0146134
dnaT	-0.237859	0.0146134
malE	-0.239768	0.0146531
yjdC	0.141109	0.0149481
lptB	0.136	0.0149674
glnD	-0.147278	0.0150407
glpG	-0.173797	0.0150656
yecD	0.182353	0.0152151
qmcA	-0.184338	0.0154845
ygfZ	-0.123614	0.0155721
ybaN	0.169314	0.0156756
ydjF	-0.308268	0.0158763
ybjQ	-0.165576	0.0160067
zntA	-0.152559	0.0160067
gpmM	0.106627	0.0160488
glnE	-0.13293	0.0161265
yddG	-0.237429	0.0161295
ibsC	-0.408713	0.0161295
accA	0.125238	0.0162102
tatD	0.302165	0.0162102
ybcM	-0.249775	0.0162841
glmU	-0.11718	0.0164818
yfbR	0.214223	0.0165562
rob	0.124714	0.0166771
ydhQ	0.124402	0.0167411
yeaY	-0.165812	0.0170846
dinF	0.213682	0.0171802
dkgB	-0.377962	0.0174459
hemA	0.128422	0.0175624
proA	-0.118639	0.0177895
mqsA	-0.274008	0.017871
nfrB	-0.252918	0.0181556
nrfA	-0.384922	0.0182413
queG	0.162252	0.0182413
yeiH	0.237268	0.0184626
asnS	-0.114347	0.0185915
argI	-0.344825	0.0186315
ldcC	0.138364	0.0186462
ylaB	0.184659	0.0187571
yihD	-0.123273	0.0187602
bcsQ	0.334953	0.0187967
yeaH	0.130566	0.0189131
glpX	0.152295	0.0189486
gpmA	0.101132	0.0192522
atpE	-0.118487	0.0192522
bcr	0.142113	0.0193195
yafC	-0.243682	0.0194942
smrA	-0.238567	0.0195481
ispA	0.149576	0.0195576
fbp	-0.144979	0.0196447
eutC	-0.218309	0.0196614
yedA	0.570841	0.0197041
ileS	0.108177	0.0197759
wbbI	-0.159872	0.0198068
yliI	0.234786	0.019967
sthA	0.222718	0.0200851
tsr	-0.303935	0.0201356
mtlR	-0.181856	0.0201371
yqhC	-0.307785	0.0202772
rsxD	0.25304	0.0203173
recA	0.115122	0.0203173
kdgK	-0.151505	0.0205291
hfq	-0.114578	0.0212225
yajQ	-0.114996	0.0214964
etp	-0.735499	0.0216644
ydjZ	-0.34713	0.0217374
yhiN	-0.210493	0.0219092
cvpA	0.150842	0.0220379
rhtB	0.278973	0.022094
pgrR	-0.234587	0.0221969
ybiC	-0.138184	0.0222271
baeR	0.181969	0.0222271
frvR	-0.585315	0.0222271
mdtM	-0.252808	0.0226504
yfeO	0.175541	0.0228772
dsbA	0.118377	0.0229766
pppA	-0.292633	0.0234832
ycdZ	-0.192661	0.0235796
norR	-0.248588	0.0236424
yliF	0.273011	0.0237211
yaeP	-0.146562	0.0237675
lit	-0.286837	0.0241921
cspG	0.301628	0.0245011
nfi	0.155263	0.0247292
leuO	-0.32403	0.0247518
cpsG	-0.575192	0.0251413
tabA	0.101336	0.0251413
cysS	-0.122881	0.0252386
mcrB	-0.240945	0.0252621
miaA	-0.109065	0.0253543
pcnB	-0.117691	0.0254419
yadH	0.168721	0.0254777
yidL	-0.666789	0.0254777
ybaK	-0.182264	0.0256253
zwf	0.119331	0.0258248
yfcJ	-0.324944	0.0259239
tcdA	-0.210426	0.0262356
yibH	-0.338758	0.0262356
tisB	0.216477	0.026243
yciA	0.260811	0.0264002
yqgF	0.190918	0.0269822
mtn	0.119564	0.027363
yddM	0.222044	0.0275275
recO	0.189175	0.0275853
yeaI	-0.414213	0.0285886
ubiJ	0.153471	0.0290069
yebG	0.179395	0.0292053
ptsN	0.125147	0.0293776
yedQ	0.159411	0.0295204
hldE	0.138855	0.0299332
pepE	0.132512	0.0300074
truC	0.191324	0.0302009
ispG	0.110734	0.0306402
moaA	-0.128027	0.0306743
feoB	0.0939268	0.03078
yihG	-0.327916	0.0309792
prlF	-0.2236	0.0312566
yhbV	-0.172829	0.0312622
ygfF	0.217398	0.0316143
rsxG	0.294906	0.0317409
treC	-0.35641	0.0318212
rseA	0.102848	0.031908
djlA	0.15644	0.0321521
fliA	-0.538164	0.0326418
srlD	0.317964	0.0328145
yjeO	0.515297	0.0329376
mprA	-0.133008	0.0334459
fhuD	0.135917	0.0336327
hda	0.161537	0.0336327
cbpM	0.118498	0.0341844
rnt	0.19567	0.0342666
mreB	0.105848	0.0346174
yfcG	0.190303	0.0347663
clsA	-0.118104	0.0347809
gadE	0.106559	0.0348929
secG	-0.103698	0.0349753
kdpC	-0.40986	0.0351262
nrdI	-0.159584	0.0351976
yjaG	0.138829	0.0351976
tadA	0.213024	0.0352071
yjbQ	0.123568	0.0353306
efeB	-0.207938	0.036069
pdxH	0.136607	0.0363349
lpxD	0.101835	0.0364322
epmB	0.147508	0.0366578
yhhW	0.160958	0.037114
yehW	0.225244	0.0371166
flgB	-0.597108	0.0371761
ihfA	0.103527	0.0372058
ydcR	0.220996	0.0374683
yoaE	0.144783	0.0380142
bolA	0.106587	0.0381604
dtpD	0.22846	0.0381604
hisL	-0.330081	0.0385292
narH	0.133057	0.0390798
tdcC	-0.307822	0.0394261
marC	0.160854	0.0394968
cysZ	0.166701	0.0394968
radA	-0.135074	0.0394968
proY	0.143905	0.0397399
serS	0.0961383	0.039961
edd	0.130788	0.0400245
rlmN	-0.123428	0.0401337
tsaA	0.199304	0.040235
ycjG	0.144743	0.040249
lysC	0.16756	0.040415
thiD	-0.164055	0.0406978
ycgV	0.157758	0.0407249
sspA	0.105171	0.0411914
kefG	0.405574	0.0411923
hcp	-0.347259	0.0413592
ybeM	-0.184921	0.0413592
rfbB	-0.120923	0.0417701
glyS	-0.0969593	0.0418922
yihO	-0.550404	0.0423477
allE	-0.211746	0.0424062
yegI	-0.299252	0.0424369
ade	-0.238302	0.0425213
nhoA	0.312571	0.0425244
yccT	-0.258215	0.0426349
degP	-0.104541	0.0427331
mhpE	0.189165	0.0431089
ghrB	0.108554	0.0431089
yfaL	0.157474	0.0437845
hemN	0.120124	0.0439852
trpR	0.152113	0.0443188
idnO	-0.43557	0.0443759
ydfK	0.587837	0.0444163
chiA	-0.180475	0.0448354
wecG	0.193949	0.0451311
ysaA	-0.215362	0.0452193
ybjC	-0.335913	0.0454391
casD	-0.341018	0.0461453
oxc	-0.477632	0.0464277
rpiA	0.103535	0.0465111
malM	-0.227211	0.0465111
malZ	0.166213	0.0465238
hsdM	-0.163465	0.0465947
yjbJ	-0.103681	0.0469355
syd	0.150536	0.0469808
gspC	-0.560916	0.0474345
secE	0.102717	0.04804
yjgL	0.133715	0.0482033
ybjT	0.134966	0.0487202
ynfL	-0.244351	0.0488948
nupG	-0.194876	0.048982
holC	-0.146555	0.049081
rnhA	0.192907	0.0495163
trmL	0.309526	0.0497072
yjjV	0.180563	0.0498515
cusC	-0.53614	0.0500718
lon	-0.0968382	0.050162
proQ	0.100081	0.050216
yohF	0.16239	0.0506148
ppiC	0.149027	0.0506246
dedD	0.132685	0.0506682
yagF	0.223338	0.0510148
lamB	-0.222979	0.0510148
ybaL	0.117078	0.0515506
yhcM	0.146787	0.0520336
metA	0.222844	0.052293
torR	-0.263274	0.0526164
gltX	0.0989436	0.0526604
ddlB	0.109367	0.0528562
yeeX	-0.0978735	0.0528562
bssS	0.106971	0.0530216
yheO	0.123216	0.0530646
ahpC	-0.0873006	0.0531869
gnsA	-0.344012	0.0532128
ansA	-0.131815	0.053259
wzzB	0.104525	0.0536387
erpA	0.119706	0.0545941
yedI	0.143637	0.0547179
yjhV	0.542907	0.0547993
yhbY	0.104169	0.0548141
holA	0.138571	0.0548528
xylB	0.255928	0.0549062
rarA	0.11379	0.0549087
yhcN	-0.257601	0.0549087
mpl	0.107088	0.0552271
guaD	-0.252491	0.0553861
eptA	-0.29539	0.0558173
ivbL	-0.131684	0.0560457
hemY	0.106476	0.0566002
mglC	-0.611456	0.0567127
aroM	0.18611	0.0567876
frdB	-0.124705	0.0570698
sufD	0.11662	0.0571792
ytfK	-0.122447	0.0572094
pgpB	0.151648	0.0572865
cysH	-0.105511	0.0574036
hdeB	0.0863563	0.0575241
pgaA	-0.197473	0.0575249
ygeA	0.164376	0.0575832
yjaZ	-0.278308	0.0575904
livH	0.508906	0.0580502
pntA	-0.0974128	0.0580897
yjhX	0.303998	0.058218
ynjI	0.271291	0.0582413
nudI	-0.292326	0.0582413
wbbL	0.128587	0.0582413
nuoA	0.11442	0.0584383
mgrB	0.244923	0.0584467
bcsC	0.131556	0.0584467
torZ	-0.258095	0.0586172
yedF	-0.496023	0.0590463
gshA	-0.096579	0.0590463
hybA	-0.218575	0.0590463
yraK	0.277029	0.0590463
chrR	0.124995	0.0590463
wecF	0.162781	0.0590463
yjaH	0.201277	0.0590463
kdsB	0.12225	0.0593706
pgpC	0.135057	0.0593706
dsrB	0.181433	0.0599172
trkG	0.222383	0.0600937
yddA	0.176458	0.0610529
kgtP	0.119384	0.0610529
ispD	0.14266	0.0613323
yigM	-0.186695	0.0613323
ybgC	0.145378	0.0619022
hisP	-0.334081	0.0619022
trmH	0.151665	0.0619022
tsaC	0.160259	0.0621902
moaD	-0.260512	0.0624364
yjgR	0.130923	0.0626257
pmrD	-0.319666	0.0628545
ycjF	-0.182507	0.0634377
flhD	-0.362446	0.0635512
pyrG	0.0903107	0.0637379
relE	-0.178567	0.0642982
gcvA	0.163712	0.0642982
xthA	-0.151938	0.0643833
mdlA	0.159703	0.0650043
cybC	0.184045	0.0650758
guaA	0.0970555	0.0652494
cysE	0.112779	0.0652494
ilvY	0.253672	0.0654023
glpD	-0.204596	0.0654761
rlmJ	0.138862	0.0657437
yadG	0.130225	0.0657948
yqgA	0.210043	0.0657953
yphF	-0.57371	0.0659747
pck	-0.100978	0.0660867
yhjG	0.112919	0.0661695
yfcF	0.150584	0.0664214
recJ	0.103394	0.0678056
creC	-0.197272	0.0680369
flk	0.175959	0.0680785
ppx	0.106646	0.0682988
nrdF	0.123035	0.0682988
hybB	-0.240854	0.0682988
wzyE	0.185881	0.0682988
yijD	0.140732	0.0682988
def	0.110343	0.0683054
ypdE	-0.628458	0.0683979
ygdG	-0.232664	0.0683979
ispH	0.112318	0.0684161
yadE	0.20882	0.0691383
ydcH	0.198287	0.06942
menD	0.115563	0.0695875
yacC	0.139869	0.069623
ttdR	-0.234687	0.0697259
barA	0.123999	0.070316
yhcB	0.0975666	0.0705181
rsxE	0.251916	0.0712488
tamB	0.0977492	0.0715986
rraB	0.0942147	0.0717085
ybaP	0.154224	0.0722404
livM	0.313937	0.0724757
slyB	-0.0880022	0.0725682
yaeI	0.285526	0.0727296
cfa	0.0845998	0.0728059
paoD	0.296343	0.0728067
ycfH	0.11166	0.0728117
tig	-0.0846508	0.0731365
csgB	-0.624639	0.0741574
yoaA	0.137478	0.0746618
yfcD	-0.119759	0.0749461
ybcW	-0.210389	0.0750262
lipA	-0.107474	0.0756848
yfcI	-0.297374	0.0756848
ygjV	0.345813	0.0759888
yzgL	0.366707	0.076408
thiM	-0.151457	0.0768627
polB	0.136363	0.07698
xanP	-0.0997142	0.07698
rmuC	-0.184285	0.0774351
ygiD	0.258521	0.077704
yfdE	-0.34783	0.0779215
potB	-0.233629	0.0783274
hsdS	-0.217753	0.0789274
ynaI	0.171909	0.079021
hycF	0.565576	0.079021
appA	0.0967353	0.0790626
ydeA	0.203265	0.0792976
fliF	-0.405496	0.0806024
speA	0.0889554	0.0809004
nhaA	0.096972	0.0810043
grxA	-0.236051	0.0812573
dapD	0.0875115	0.0814285
cdd	-0.126177	0.081626
yibI	-0.39588	0.0820021
aldA	-0.229399	0.0820912
rsmC	0.1242	0.0821319
yjaA	-0.595618	0.0823045
hipB	-0.375817	0.0827964
sgrR	-0.159727	0.0837042
lipB	0.155223	0.0838889
acrD	0.148659	0.0840766
yfeY	-0.123779	0.0841192
yfhM	0.0905391	0.0841192
dsbE	0.290038	0.0849205
gluQ	-0.173431	0.0854725
yidD	0.233547	0.0855983
yebF	-0.113887	0.0856221
yidR	0.125508	0.0858438
mglB	-0.460475	0.0859176
cyaA	0.0848452	0.0860952
ycgL	-0.146785	0.0867076
exuT	0.16683	0.0869748
hslV	0.12442	0.0869748
ftsB	0.133671	0.0873614
yqcC	0.186451	0.0875618
ydbL	0.237957	0.087818
yedD	-0.106335	0.0883381
opgG	-0.0906609	0.0884647
pdxB	0.0978734	0.0884647
pykA	0.0825929	0.0889094
ynfC	-0.171166	0.0891449
dnaA	-0.0914909	0.0893359
mrcB	0.096957	0.089634
yqeG	-0.183698	0.0898179
ubiH	0.107101	0.0898179
yrbL	-0.0915538	0.0905006
yceH	-0.124104	0.0911772
suhB	0.141671	0.0917329
elaA	0.144614	0.0917455
slmA	-0.136922	0.0922172
tusC	0.210549	0.0926989
arnD	0.27056	0.0927424
eamB	0.26672	0.0928564
tilS	0.128825	0.0928724
nuoB	0.10451	0.0929861
yebS	0.154781	0.0931669
wcaI	-0.521425	0.0932539
aphA	-0.14381	0.0932638
htrE	-0.302429	0.0936589
panE	-0.121045	0.0940433
mazG	0.126762	0.0940433
hsrA	0.184344	0.0940433
creB	-0.227107	0.0940433
rseP	0.0906411	0.0941623
ygdD	0.212987	0.0942953
pqiC	0.179311	0.0944089
ykfF	0.320632	0.0949037
yeeN	0.0979539	0.0960157
yhgE	0.156681	0.0962279
degS	0.122976	0.0968015
mioC	-0.113503	0.0972559
glgS	-0.0997608	0.0973765
yebE	0.171025	0.0976916
fhlA	0.151988	0.0976916
rnr	-0.0865926	0.0976916
sra	0.0837711	0.0977487
ycgJ	-0.159901	0.0993642
flhC	-0.276958	0.0996054
xylG	-0.335903	0.100023
argD	-0.150812	0.100084
panM	0.144679	0.101166
rluF	-0.116843	0.101383
yehB	-0.39073	0.101537
phoE	-0.510921	0.102144
gmk	0.0929195	0.102144
gstA	-0.117195	0.102191
betI	-0.278314	0.102687
ybiU	-0.225715	0.102687
hscB	0.141421	0.102687
ytjA	-0.126849	0.103483
ydcS	0.155724	0.104016
rzpR	0.39253	0.104016
dadA	-0.146848	0.104075
ivy	0.0888592	0.104149
tolC	-0.0817022	0.104286
puuA	-0.261614	0.104424
ytjC	0.130311	0.104475
ygiN	0.0888284	0.104642
dnaX	0.0901774	0.104803
ymjA	0.191758	0.10497
feaB	0.204619	0.106033
ydeN	-0.328673	0.106226
rpoN	0.0858273	0.106226
yfjK	0.109909	0.106871
lnt	0.100989	0.107026
ldtE	-0.0942727	0.107026
yjiL	-0.285766	0.107828
ynfD	0.142941	0.107839
yacG	0.18586	0.108419
yicN	0.214647	0.108453
yigZ	0.135495	0.10848
garD	-0.179084	0.108608
ydeJ	-0.234674	0.108767
napA	-0.17656	0.109402
tgt	-0.101499	0.109413
yjdK	-0.323835	0.109608
ugd	0.20757	0.10998
mscK	-0.092533	0.110092
pabA	0.224488	0.110384
ydcJ	0.184471	0.11105
crl	0.110531	0.111564
atpI	-0.100646	0.112029
mntR	0.185216	0.112707
frc	-0.402814	0.113501
frr	0.081835	0.113833
yghB	0.12466	0.113853
narU	0.229355	0.114018
aroD	0.114807	0.114018
gcvP	0.0807593	0.114478
azoR	-0.156929	0.114999
puuC	-0.296531	0.115317
ycbU	-0.493696	0.115698
lolA	0.0988919	0.116087
tatA	-0.0988201	0.116442
glpR	-0.153579	0.116509
trmJ	0.099723	0.116526
pyrI	0.111047	0.116663
hokD	-0.179735	0.117761
afuC	-0.383253	0.117811
zapB	-0.0877492	0.118293
flgA	-0.339095	0.119706
yeeY	0.171582	0.119706
glrR	0.121258	0.119841
yehS	0.137249	0.119933
queD	0.224377	0.12066
ibpA	-0.16497	0.120945
thiK	0.13655	0.12106
mlaA	-0.0934573	0.121484
tauC	-0.533695	0.122222
rzpD	-0.307529	0.123087
dinG	0.140304	0.123087
yneE	0.1957	0.123087
yoaB	-0.109826	0.12337
lpoB	-0.0887481	0.124211
rpoC	-0.0704379	0.124676
ccmH	0.167466	0.124991
fes	-0.0817657	0.125642
yshB	-0.121387	0.125642
bfr	0.11391	0.125982
modC	0.173669	0.126563
fkpB	0.116939	0.12665
lsrA	-0.343387	0.12665
soxS	-0.226457	0.126708
yadL	-0.524316	0.127202
insO	-0.257202	0.127851
dadX	-0.162998	0.128625
katE	0.0853945	0.12883
mdtC	0.1547	0.129121
hflX	0.0791014	0.129121
ymfJ	0.247964	0.129129
rlmC	-0.191333	0.12949
recR	0.0892094	0.129636
corA	-0.102551	0.129848
ydhW	-0.338381	0.130404
ampD	0.136354	0.13077
yjhH	-0.287017	0.131061
ylcI	-0.292824	0.132492
efeU	0.162154	0.132585
infC	-0.071487	0.133667
yggE	-0.0814641	0.133667
dtd	0.137312	0.133943
arfA	0.398017	0.133983
yniA	0.0869566	0.1342
mlaC	-0.0912517	0.134254
hcaD	0.223707	0.134482
yhhA	-0.126743	0.134643
ycdY	0.100369	0.13548
waaA	0.118826	0.13548
yjeT	0.434644	0.13548
yeeP	0.278115	0.13548
dacA	0.0876515	0.135994
yacH	0.217295	0.136762
hcaE	0.154981	0.136762
acrB	0.076798	0.136873
pyrL	0.326747	0.136908
insQ	0.119867	0.137371
speB	0.0908548	0.137401
queA	-0.114547	0.137571
mog	0.133124	0.138046
fryA	-0.240491	0.138308
pptA	-0.220534	0.138326
rimI	-0.186724	0.138978
hupA	0.0747369	0.139348
ybdG	0.105629	0.139398
ybeL	-0.0844844	0.139964
leuB	0.121034	0.140283
glxK	0.250273	0.140444
arnA	-0.127736	0.141732
btuE	0.0932814	0.141991
sapD	0.115662	0.142092
yecH	-0.123728	0.142092
lysA	0.273747	0.142092
kdsD	0.0995798	0.142092
yjfN	0.187083	0.142092
minD	-0.0808676	0.142137
dsbD	0.10331	0.142266
rpsU	0.0766636	0.142423
ytfT	0.35701	0.142911
udk	0.118207	0.143138
folP	0.140078	0.143662
tldD	0.0814477	0.144932
yahG	0.217997	0.145097
fliY	-0.0783102	0.145097
yebC	-0.0804971	0.14564
adiA	0.159128	0.14564
yecC	0.0997571	0.145988
yjjK	-0.0779654	0.145988
gstB	-0.0927267	0.146381
ycaR	0.197002	0.146398
nudC	0.102069	0.147224
mscM	0.0942241	0.148079
murE	0.0826266	0.148158
ycbZ	0.0845848	0.148158
rstB	-0.104693	0.148373
phoH	-0.301784	0.149033
ydhZ	0.167334	0.149037
nuoL	-0.0909928	0.149087
yodD	0.120439	0.149566
yliE	0.129093	0.149903
exuR	0.0997434	0.149903
tusD	0.148161	0.149903
rodZ	0.078704	0.149994
yhbS	0.0960972	0.151207
nanS	-0.236794	0.151207
yicS	-0.277704	0.151538
queC	0.117165	0.151667
cusB	-0.378385	0.151667
aroA	0.0775744	0.151667
ccmE	0.209846	0.151667
yebZ	0.120727	0.152661
leuA	0.11102	0.153291
ygbN	0.258254	0.153291
ppiA	0.100178	0.153371
fumC	0.264766	0.153744
purR	-0.0795538	0.154318
gtrB	0.0971585	0.156015
ppsR	-0.128485	0.156276
lpoA	-0.0824509	0.156684
lptE	0.0913666	0.15691
ynaE	0.45729	0.15691
yfbM	-0.352107	0.157016
mrdB	0.115827	0.158697
sspB	0.0839358	0.158755
gsk	-0.0987275	0.159466
yieE	0.124927	0.159713
yhhQ	-0.276369	0.15997
mdtN	0.382913	0.159991
yafV	0.1052	0.161157
yjeI	0.0798712	0.161157
yicO	-0.370553	0.161287
tus	-0.167944	0.161503
ybiI	-0.188144	0.161785
fepD	0.0990714	0.162835
rsxB	-0.164798	0.163218
mutL	0.0867854	0.163232
cpxA	0.0835642	0.16466
yciB	0.125612	0.164768
mlaF	-0.0894804	0.166532
fsaA	0.185649	0.166885
yffS	0.112815	0.166885
smpB	-0.0882287	0.166885
ytfH	0.317381	0.167674
ychH	0.108635	0.167891
yeeZ	0.0792357	0.167891
nudL	-0.13893	0.168531
hcaR	-0.308887	0.168615
dmlA	-0.17447	0.168815
yjdJ	0.144674	0.171526
mdtG	0.174202	0.171837
fliZ	-0.282122	0.171837
uhpB	-0.180717	0.171837
rbsC	0.139688	0.171837
dnaJ	-0.0833885	0.172015
frsA	0.0929746	0.172015
galE	0.0995497	0.172015
yjiC	-0.397101	0.172197
ldtB	-0.0787316	0.173812
ycgB	0.0830275	0.173812
iscU	0.0916774	0.173862
pheT	0.0674093	0.174078
zupT	0.0862439	0.174084
glnQ	-0.0978529	0.174228
csgF	-0.183145	0.174269
ymfE	-0.373237	0.174674
paaY	0.151841	0.174674
ydfI	-0.216485	0.174743
dcuA	-0.0736316	0.174853
yjjU	0.0981359	0.174898
idnR	-0.161965	0.175138
yraQ	0.197	0.175164
ynhF	-0.132632	0.175199
puuR	0.232425	0.175363
sufA	-0.116165	0.175776
slyX	-0.173652	0.175982
waaZ	-0.172385	0.176104
eutA	0.345865	0.17631
tufA	-0.0625393	0.176336
solA	-0.091904	0.17639
sfsB	0.236498	0.177022
gloA	-0.0805635	0.177172
nagZ	0.092858	0.1773
malF	-0.200903	0.178098
yhjX	-0.204525	0.178324
yecM	-0.119951	0.179114
metB	0.114	0.179114
yafJ	0.0932759	0.179439
secM	0.0948178	0.17971
prkB	0.105593	0.179853
ydhV	-0.293515	0.18016
ycjX	-0.124606	0.18041
yihN	-0.329186	0.180791
amiA	-0.111083	0.18108
hyfR	0.236094	0.181662
mzrA	0.140721	0.182239
flc	0.173082	0.182434
bcsE	0.079363	0.182611
yjfP	0.143129	0.182611
yneF	0.194004	0.182625
yeaO	-0.115484	0.1833
yjdO	-0.378369	0.183426
ycjD	0.258193	0.183984
btuD	0.102365	0.183984
waaQ	-0.0966457	0.185054
ssuB	0.264108	0.18536
ybbN	-0.0775373	0.185614
allC	-0.206732	0.18572
yjhR	-0.316142	0.186562
rtcB	-0.178943	0.187726
uvrB	-0.0766322	0.18799
bcsA	0.188281	0.188716
lhgO	0.119945	0.188976
zur	0.112625	0.188976
dinI	0.161916	0.189449
fic	0.112024	0.189449
yfaE	-0.223322	0.189853
feaR	-0.377554	0.190219
rfbA	-0.0849482	0.190219
gntR	0.0909145	0.190219
nikR	0.143788	0.190219
ykgA	-0.239598	0.190219
ygaH	0.137965	0.190417
lepA	0.0714853	0.191557
rne	0.0682763	0.191919
yjiP	-0.150482	0.192329
yiaK	-0.467257	0.192553
rsmG	0.143983	0.1928
degQ	-0.0930238	0.193625
murF	0.0777053	0.19415
galT	0.115739	0.19415
yqgE	0.0892836	0.19431
tnaB	-0.356342	0.19437
aas	0.086437	0.194445
emrA	0.121847	0.19447
uxuB	0.166262	0.19447
arcA	-0.0668882	0.194597
yrfF	-0.098188	0.195069
truD	0.0881614	0.195119
yhhM	-0.162974	0.195119
cnu	-0.122429	0.195142
etk	-0.119821	0.19791
fumB	-0.186917	0.198827
sgbH	-0.430218	0.199863
proW	-0.144794	0.200147
pitA	0.0776976	0.200147
yggU	0.198875	0.200279
yieL	-0.35417	0.200955
yfgO	-0.102648	0.201357
yncE	0.0621988	0.201587
lolD	0.0957394	0.201621
psiF	0.106191	0.201875
ygaZ	0.084755	0.202162
xylR	-0.136626	0.202198
aspS	-0.0671409	0.203281
proX	-0.143464	0.203335
yaeR	0.134644	0.204891
nhaR	0.0980534	0.205469
yaiP	-0.267057	0.206174
tyrP	-0.160901	0.206823
ynfM	0.10581	0.206914
ubiE	0.080065	0.207129
tonB	-0.0697147	0.207322
rlmA	0.122787	0.207787
hypB	-0.113203	0.208048
rhmT	0.420095	0.208939
flxA	-0.27582	0.209477
yehY	0.106924	0.209477
yddW	0.115762	0.20958
gph	0.085922	0.210271
yeaM	-0.189855	0.21053
ypeA	-0.122341	0.21053
yjiK	-0.228724	0.21053
intD	-0.108845	0.211351
yejB	0.161103	0.211362
yhbE	-0.0998717	0.212457
setC	-0.451992	0.212954
rimL	0.130789	0.215247
yidG	0.310177	0.216661
malK	-0.229506	0.217099
argR	-0.091096	0.218277
pntB	-0.0685023	0.218977
cheZ	0.264172	0.218977
cusA	-0.181964	0.219027
ypdC	0.140441	0.219091
aceA	0.0672347	0.219799
yciM	0.0859507	0.220107
bcsZ	0.235972	0.220135
proV	-0.131224	0.220486
xseB	0.117474	0.221329
sbcB	0.0899879	0.221619
yafE	0.158875	0.222456
dgt	-0.0934979	0.222843
pfo	-0.0733367	0.222843
uxuA	0.192937	0.222892
kbl	-0.070724	0.22344
envY	-0.26663	0.223645
eutR	-0.173329	0.223687
add	0.100807	0.224006
yadI	0.182105	0.224216
rsd	-0.100952	0.224577
chaC	0.0895507	0.225403
msrB	0.204651	0.225615
trpC	-0.0683683	0.225673
yibN	0.076569	0.225746
glxR	-0.399446	0.226521
relB	-0.164703	0.226741
aslA	-0.186804	0.226862
narQ	-0.098301	0.226958
ydbC	-0.10176	0.226993
ygjH	0.445739	0.226993
ratB	0.19379	0.227242
ycgN	-0.138598	0.228052
puuD	0.237552	0.228247
topB	0.0769362	0.228247
yedY	-0.115031	0.228464
tdcD	-0.372118	0.228464
csdA	0.0917207	0.228705
citB	-0.147636	0.229343
fucK	-0.182233	0.229718
aroF	-0.0962304	0.229959
lrhA	0.0750477	0.230273
ydiO	0.312177	0.231442
yegT	-0.25837	0.231442
hscC	-0.21611	0.232164
ybhN	0.146749	0.232164
talB	0.0615771	0.232315
ygiC	0.0725348	0.232315
ftsN	-0.0783741	0.232315
ydcP	-0.096306	0.232345
yejL	-0.103661	0.232539
argP	0.0816899	0.23279
rnc	0.0759982	0.233582
uspE	0.0657475	0.234486
[truncated: 1,936 more rows]

## Sheet: rich-5FU_S15 - log2 and pval
Gene name	log2FoldChange	FDR adj pval
[truncated: 4,250 more rows]

[truncated: 1 more sheets: rich-5FU_S16 - log2 and pval]
