# Supplementary material for: Evolved bacterial resistance against fluoropyrimidines can lower chemotherapy impact in the Caenorhabditis elegans host
Source: eLife. 2020 Nov 30;9:e59831. doi: 10.7554/eLife.59831 (PMC7725501; doi:10.7554/eLife.59831)
Supplement: Supplementary file 7. [file elife-59831-supp7.xlsx]

## Sheet: poor-5FU_S01 - Enrichment
Geneset name	Database name	FDR adj pval	set.size
eco03010 Ribosome	KEGG	5.92594e-24	56
eco01230 Biosynthesis of amino acids	KEGG	0.000489789	117
eco00920 Sulfur metabolism	KEGG	0.00603703	31
eco00190 Oxidative phosphorylation	KEGG	0.00603703	43
eco00020 Citrate cycle (TCA cycle)	KEGG	0.0121932	27
eco00010 Glycolysis / Gluconeogenesis	KEGG	0.0125869	44
eco01130 Biosynthesis of antibiotics	KEGG	0.0148186	208
eco00650 Butanoate metabolism	KEGG	0.0310655	37
eco00250 Alanine, aspartate and glutamate metabolism	KEGG	0.0388364	33
eco01200 Carbon metabolism	KEGG	0.0513114	109
eco00730 Thiamine metabolism	KEGG	0.0591033	14
eco00330 Arginine and proline metabolism	KEGG	0.0958491	25
HEXITOLDEGSUPER-PWY superpathway of hexitol degradation (bacteria)	EcoCyc	0.002512	28
GLYCOLYSIS-E-D superpathway of glycolysis and the Entner-Doudoroff pathway	EcoCyc	0.0126038	22
GLYCOLYSIS glycolysis I (from glucose 6-phosphate)	EcoCyc	0.023941	18
PWY0-781 aspartate superpathway	EcoCyc	0.0264694	27
PWY0-162 superpathway of pyrimidine ribonucleotides <i>de novo</i> biosynthesis	EcoCyc	0.0264694	12
PWY-5484 glycolysis II (from fructose 6-phosphate)	EcoCyc	0.0370355	18
PENTOSE-P-PWY pentose phosphate pathway	EcoCyc	0.0458583	10
PRPP-PWY \superpathway of histidine"	EcoCyc	0.0649147	43
PWY-6071 superpathway of phenylethylamine degradation	EcoCyc	0.0800135	12
NONMEVIPP-PWY methylerythritol phosphate pathway I	EcoCyc	0.0938535	11
DENOVOPURINE2-PWY superpathway of purine nucleotides <i>de novo</i> biosynthesis II	EcoCyc	0.0938535	24
ECASYN-PWY enterobacterial common antigen biosynthesis	EcoCyc	0.0938535	11
PWY-7892 tRNA-uridine 2-thiolation and selenation (bacteria)	EcoCyc	0.0938535	12
KDO-NAGLIPASYN-PWY superpathway of (Kdo)<SUB>2</SUB>-lipid A biosynthesis	EcoCyc	0.0938535	16
GO:1901135 carbohydrate derivative metabolic process	GO	0.000317394	284
GO:0072524 pyridine-containing compound metabolic process	GO	0.000317394	50
GO:0072525 pyridine-containing compound biosynthetic process	GO	0.000317394	34
GO:0044264 cellular polysaccharide metabolic process	GO	0.000426012	76
GO:0031163 metallo-sulfur cluster assembly	GO	0.000426012	18
GO:0005976 polysaccharide metabolic process	GO	0.000781529	80
GO:0016051 carbohydrate biosynthetic process	GO	0.000781529	93
GO:0016226 iron-sulfur cluster assembly	GO	0.000781529	17
GO:1901137 carbohydrate derivative biosynthetic process	GO	0.000781529	172
GO:0008610 lipid biosynthetic process	GO	0.00091985	95
GO:0046496 nicotinamide nucleotide metabolic process	GO	0.00091985	40
GO:0019359 nicotinamide nucleotide biosynthetic process	GO	0.00091985	24
GO:0033692 cellular polysaccharide biosynthetic process	GO	0.00091985	68
GO:0044262 cellular carbohydrate metabolic process	GO	0.00091985	131
GO:0019637 organophosphate metabolic process	GO	0.00091985	199
GO:0034637 cellular carbohydrate biosynthetic process	GO	0.00119572	71
GO:0019362 pyridine nucleotide metabolic process	GO	0.00135846	41
GO:0000271 polysaccharide biosynthetic process	GO	0.00135846	70
GO:0090407 organophosphate biosynthetic process	GO	0.00146348	130
GO:0019363 pyridine nucleotide biosynthetic process	GO	0.00146348	25
GO:0051186 cofactor metabolic process	GO	0.00146348	205
GO:0009165 nucleotide biosynthetic process	GO	0.00161262	75
GO:0006732 coenzyme metabolic process	GO	0.00261561	144
GO:1901293 nucleoside phosphate biosynthetic process	GO	0.00261561	78
GO:0006568 tryptophan metabolic process	GO	0.00261561	11
GO:0006586 indolalkylamine metabolic process	GO	0.00261561	11
GO:0042430 indole-containing compound metabolic process	GO	0.00261561	11
GO:0009108 coenzyme biosynthetic process	GO	0.00261561	103
GO:0044255 cellular lipid metabolic process	GO	0.00274448	130
GO:0006576 cellular biogenic amine metabolic process	GO	0.00274448	29
GO:0006073 cellular glucan metabolic process	GO	0.00320636	17
GO:0006753 nucleoside phosphate metabolic process	GO	0.00380137	123
GO:0006629 lipid metabolic process	GO	0.00380137	132
GO:0009127 purine nucleoside monophosphate biosynthetic process	GO	0.00380137	27
GO:0009168 purine ribonucleoside monophosphate biosynthetic process	GO	0.00380137	27
GO:0009156 ribonucleoside monophosphate biosynthetic process	GO	0.00635526	28
GO:0009124 nucleoside monophosphate biosynthetic process	GO	0.00635526	31
GO:0006733 oxidoreduction coenzyme metabolic process	GO	0.00635526	57
GO:0019682 glyceraldehyde-3-phosphate metabolic process	GO	0.00747797	17
GO:0009308 amine metabolic process	GO	0.00831029	31
GO:0044106 cellular amine metabolic process	GO	0.00831029	31
GO:0006081 cellular aldehyde metabolic process	GO	0.00831029	48
GO:0055086 nucleobase-containing small molecule metabolic process	GO	0.00831029	183
GO:0006096 glycolytic process	GO	0.00895657	13
GO:0042866 pyruvate biosynthetic process	GO	0.00895657	13
GO:0006796 phosphate-containing compound metabolic process	GO	0.00926895	247
GO:0019693 ribose phosphate metabolic process	GO	0.00996315	80
GO:0009117 nucleotide metabolic process	GO	0.0100868	119
GO:0051156 glucose 6-phosphate metabolic process	GO	0.0112577	12
GO:0006164 purine nucleotide biosynthetic process	GO	0.0130407	44
GO:0006793 phosphorus metabolic process	GO	0.0141201	264
GO:0005975 carbohydrate metabolic process	GO	0.0156196	229
GO:0008654 phospholipid biosynthetic process	GO	0.0163365	36
GO:0006165 nucleoside diphosphate phosphorylation	GO	0.0163365	14
GO:0006757 ATP generation from ADP	GO	0.0163365	14
GO:0046939 nucleotide phosphorylation	GO	0.0163365	14
GO:0009126 purine nucleoside monophosphate metabolic process	GO	0.0163365	31
GO:0009167 purine ribonucleoside monophosphate metabolic process	GO	0.0163365	31
GO:0034404 nucleobase-containing small molecule biosynthetic process	GO	0.0164627	43
GO:0006098 pentose-phosphate shunt	GO	0.0168815	11
GO:0009260 ribonucleotide biosynthetic process	GO	0.0168983	42
GO:0046390 ribose phosphate biosynthetic process	GO	0.0178488	44
GO:0009311 oligosaccharide metabolic process	GO	0.0178488	49
GO:0072522 purine-containing compound biosynthetic process	GO	0.018354	45
GO:0042180 cellular ketone metabolic process	GO	0.018354	45
GO:1903509 liposaccharide metabolic process	GO	0.0202639	49
GO:0044042 glucan metabolic process	GO	0.0207526	19
GO:0051188 cofactor biosynthetic process	GO	0.0222311	139
GO:0042558 pteridine-containing compound metabolic process	GO	0.0222311	19
GO:0006760 folic acid-containing compound metabolic process	GO	0.0274362	17
GO:0046112 nucleobase biosynthetic process	GO	0.0275442	13
GO:0009185 ribonucleoside diphosphate metabolic process	GO	0.0314702	18
GO:0042455 ribonucleoside biosynthetic process	GO	0.0321398	17
GO:0009250 glucan biosynthetic process	GO	0.032306	11
GO:0009312 oligosaccharide biosynthetic process	GO	0.0363706	38
GO:0009072 aromatic amino acid family metabolic process	GO	0.0363706	31
GO:0046653 tetrahydrofolate metabolic process	GO	0.0363706	13
GO:0043648 dicarboxylic acid metabolic process	GO	0.0407047	69
GO:0046164 alcohol catabolic process	GO	0.0408961	21
GO:0006644 phospholipid metabolic process	GO	0.0430567	39
GO:0009123 nucleoside monophosphate metabolic process	GO	0.0440829	38
GO:0009163 nucleoside biosynthetic process	GO	0.045169	18
GO:1901659 glycosyl compound biosynthetic process	GO	0.045169	18
GO:0009132 nucleoside diphosphate metabolic process	GO	0.045169	19
GO:0009145 purine nucleoside triphosphate biosynthetic process	GO	0.045169	19
GO:0009206 purine ribonucleoside triphosphate biosynthetic process	GO	0.045169	19
GO:0009161 ribonucleoside monophosphate metabolic process	GO	0.0474253	35
GO:0006739 NADP metabolic process	GO	0.0488589	15
GO:0009309 amine biosynthetic process	GO	0.0489599	14
GO:0042401 cellular biogenic amine biosynthetic process	GO	0.0489599	14
GO:0019674 NAD metabolic process	GO	0.0508833	12
GO:0009152 purine ribonucleotide biosynthetic process	GO	0.0508833	38
GO:0006508 proteolysis	GO	0.0524408	45
GO:0032502 developmental process	GO	0.0573743	22
GO:0006090 pyruvate metabolic process	GO	0.0573743	26
GO:0042181 ketone biosynthetic process	GO	0.058796	24
GO:1901661 quinone metabolic process	GO	0.058796	24
GO:1901663 quinone biosynthetic process	GO	0.058796	24
GO:0043163 cell envelope organization	GO	0.058796	11
GO:0043165 Gram-negative-bacterium-type cell outer membrane assembly	GO	0.058796	11
GO:0044091 membrane biogenesis	GO	0.058796	11
GO:0071709 membrane assembly	GO	0.058796	11
GO:0009201 ribonucleoside triphosphate biosynthetic process	GO	0.0594113	20
GO:0009135 purine nucleoside diphosphate metabolic process	GO	0.0594113	17
GO:0009179 purine ribonucleoside diphosphate metabolic process	GO	0.0594113	17
GO:0046031 ADP metabolic process	GO	0.0594113	17
GO:1901616 organic hydroxy compound catabolic process	GO	0.059628	25
GO:0008653 lipopolysaccharide metabolic process	GO	0.0604317	38
GO:0006536 glutamate metabolic process	GO	0.0604602	11
GO:0006221 pyrimidine nucleotide biosynthetic process	GO	0.0624297	11
GO:0019751 polyol metabolic process	GO	0.0624297	14
GO:0006206 pyrimidine nucleobase metabolic process	GO	0.0625529	23
GO:0006066 alcohol metabolic process	GO	0.0630229	36
GO:0042938 dipeptide transport	GO	0.0657193	16
GO:0009653 anatomical structure morphogenesis	GO	0.0665282	16
GO:0022603 regulation of anatomical structure morphogenesis	GO	0.0665282	16
GO:0048856 anatomical structure development	GO	0.0665282	16
GO:0048869 cellular developmental process	GO	0.0665282	16
GO:0050793 regulation of developmental process	GO	0.0665282	16
GO:0009112 nucleobase metabolic process	GO	0.0667777	30
GO:0009435 NAD biosynthetic process	GO	0.0667777	11
GO:0009103 lipopolysaccharide biosynthetic process	GO	0.0667777	36
GO:0006643 membrane lipid metabolic process	GO	0.0667777	13
GO:0006664 glycolipid metabolic process	GO	0.0667777	13
GO:0009247 glycolipid biosynthetic process	GO	0.0667777	13
GO:0046467 membrane lipid biosynthetic process	GO	0.0667777	13
GO:1901269 lipooligosaccharide metabolic process	GO	0.0667777	13
GO:1901271 lipooligosaccharide biosynthetic process	GO	0.0667777	13
GO:0035442 dipeptide transmembrane transport	GO	0.0667777	11
GO:0009142 nucleoside triphosphate biosynthetic process	GO	0.0677902	24
GO:0015803 branched-chain amino acid transport	GO	0.0733058	11
GO:0045017 glycerolipid biosynthetic process	GO	0.0742632	13
GO:0006885 regulation of pH	GO	0.0742632	11
GO:0006754 ATP biosynthetic process	GO	0.0762204	18
GO:0015931 nucleobase-containing compound transport	GO	0.0768367	12
GO:0009233 menaquinone metabolic process	GO	0.0770817	10
GO:0009234 menaquinone biosynthetic process	GO	0.0770817	10
GO:0046174 polyol catabolic process	GO	0.0774703	12
GO:0006857 oligopeptide transport	GO	0.0774703	28
GO:0000902 cell morphogenesis	GO	0.0892116	15
GO:0008360 regulation of cell shape	GO	0.0892116	15
GO:0022604 regulation of cell morphogenesis	GO	0.0892116	15
GO:0032989 cellular component morphogenesis	GO	0.0892116	15
GO:0043094 cellular metabolic compound salvage	GO	0.0912334	20

## Sheet: poor-5FU_S01 - Depletion
Geneset name	Database name	FDR adj pval	set.size
PWY0-1336 NADH to fumarate electron transfer	EcoCyc	0.000161112	17
PWY0-1335 NADH to cytochrome <i>bo</i> oxidase electron transfer I	EcoCyc	0.000161112	17
PWY0-1334 NADH to cytochrome <i>bd</i> oxidase electron transfer I	EcoCyc	0.000222638	16
PWY0-1590 NADH to hydrogen peroxide electron transfer	EcoCyc	0.000716691	14
PWY0-1348 NADH to dimethyl sulfoxide electron transfer	EcoCyc	0.00131786	16
PWY0-1585 formate to nitrite electron transfer	EcoCyc	0.00136644	10
PWY0-1347 NADH to trimethylamine <i>N</i>-oxide electron transfer	EcoCyc	0.0016799	15
THISYN-PWY superpathway of thiamine diphosphate biosynthesis I	EcoCyc	0.0283058	13
SULFATE-CYS-PWY superpathway of sulfate assimilation and cysteine biosynthesis	EcoCyc	0.0557504	15
ARGSYN-PWY L-arginine biosynthesis I (via L-ornithine)	EcoCyc	0.090471	12
GO:0042255 ribosome assembly	GO	1.48626e-11	51
GO:0022618 ribonucleoprotein complex assembly	GO	1.81321e-11	52
GO:0070925 organelle assembly	GO	3.2767e-11	61
GO:0071826 ribonucleoprotein complex subunit organization	GO	4.87065e-11	54
GO:0034622 cellular protein-containing complex assembly	GO	5.32828e-08	74
GO:0042254 ribosome biogenesis	GO	1.67609e-07	90
GO:0006996 organelle organization	GO	1.67609e-07	87
GO:0022613 ribonucleoprotein complex biogenesis	GO	1.88493e-07	91
GO:0000027 ribosomal large subunit assembly	GO	6.54798e-07	28
GO:0042273 ribosomal large subunit biogenesis	GO	6.54798e-07	28
GO:0045333 cellular respiration	GO	1.70367e-06	95
GO:0015980 energy derivation by oxidation of organic compounds	GO	3.01895e-05	107
GO:0042274 ribosomal small subunit biogenesis	GO	0.000227234	23
GO:0030030 cell projection organization	GO	0.000251984	50
GO:0009061 anaerobic respiration	GO	0.000289614	60
GO:0055114 oxidation-reduction process	GO	0.000944854	155
GO:0000028 ribosomal small subunit assembly	GO	0.000979448	20
GO:0006091 generation of precursor metabolites and energy	GO	0.00119741	123
GO:0043711 pilus organization	GO	0.00295897	40
GO:0043043 peptide biosynthetic process	GO	0.00732725	94
GO:0022610 biological adhesion	GO	0.00915207	45
GO:0065003 protein-containing complex assembly	GO	0.00994953	165
GO:0022904 respiratory electron transport chain	GO	0.0277868	21
GO:0022607 cellular component assembly	GO	0.0277868	223
GO:0009060 aerobic respiration	GO	0.0285415	43
GO:0022900 electron transport chain	GO	0.0285415	24
GO:0042930 enterobactin transport	GO	0.0297155	11
GO:0043933 protein-containing complex subunit organization	GO	0.0297155	190
GO:0043604 amide biosynthetic process	GO	0.0297155	122
GO:0007155 cell adhesion	GO	0.0471053	41
GO:1902600 proton transmembrane transport	GO	0.0615357	17
GO:0034220 ion transmembrane transport	GO	0.0615357	124
GO:0006412 translation	GO	0.0684302	83
GO:0030031 cell projection assembly	GO	0.0699102	23
GO:0006811 ion transport	GO	0.080985	251
GO:0032270 positive regulation of cellular protein metabolic process	GO	0.080985	11
GO:0098655 cation transmembrane transport	GO	0.087685	70
GO:0015711 organic anion transport	GO	0.0922483	137

## Sheet: poor-5FU_S04 - Enrichment
Geneset name	Database name	FDR adj pval	set.size
eco03010 Ribosome	KEGG	7.78719e-19	56
eco01230 Biosynthesis of amino acids	KEGG	0.00258926	117
eco00250 Alanine, aspartate and glutamate metabolism	KEGG	0.0220401	33
eco01130 Biosynthesis of antibiotics	KEGG	0.0566526	208
eco01501 beta-Lactam resistance	KEGG	0.0686404	17
eco00220 Arginine biosynthesis	KEGG	0.0686404	18
eco02010 ABC transporters	KEGG	0.0686404	178
eco00910 Nitrogen metabolism	KEGG	0.0884255	24
GLYCOLYSIS-E-D superpathway of glycolysis and the Entner-Doudoroff pathway	EcoCyc	0.00089829	22
PWY0-162 superpathway of pyrimidine ribonucleotides <i>de novo</i> biosynthesis	EcoCyc	0.00089829	12
HEXITOLDEGSUPER-PWY superpathway of hexitol degradation (bacteria)	EcoCyc	0.00089829	28
GLYCOLYSIS glycolysis I (from glucose 6-phosphate)	EcoCyc	0.00157483	18
PRPP-PWY \superpathway of histidine"	EcoCyc	0.00220284	43
ECASYN-PWY enterobacterial common antigen biosynthesis	EcoCyc	0.00220284	11
DENOVOPURINE2-PWY superpathway of purine nucleotides <i>de novo</i> biosynthesis II	EcoCyc	0.0044001	24
PWY-5484 glycolysis II (from fructose 6-phosphate)	EcoCyc	0.0054447	18
PWY0-781 aspartate superpathway	EcoCyc	0.0129612	27
KDO-NAGLIPASYN-PWY superpathway of (Kdo)<SUB>2</SUB>-lipid A biosynthesis	EcoCyc	0.0140355	16
PENTOSE-P-PWY pentose phosphate pathway	EcoCyc	0.0154837	10
PWY-7211 superpathway of pyrimidine deoxyribonucleotides <i>de novo</i> biosynthesis	EcoCyc	0.0154837	23
ALL-CHORISMATE-PWY superpathway of chorismate metabolism	EcoCyc	0.0173486	59
DAPLYSINESYN-PWY L-lysine biosynthesis I	EcoCyc	0.0273694	10
LPSSYN-PWY superpathway of lipopolysaccharide biosynthesis	EcoCyc	0.0273694	24
NONMEVIPP-PWY methylerythritol phosphate pathway I	EcoCyc	0.0294262	11
PEPTIDOGLYCANSYN-PWY peptidoglycan biosynthesis I (<I>meso</I>-diaminopimelate containing)	EcoCyc	0.0512272	11
PWY-6612 superpathway of tetrahydrofolate biosynthesis	EcoCyc	0.052306	11
UBISYN-PWY superpathway of ubiquinol-8 biosynthesis (prokaryotic)	EcoCyc	0.0746665	11
FERMENTATION-PWY mixed acid fermentation	EcoCyc	0.0824454	33
PWY-5838 superpathway of menaquinol-8 biosynthesis I	EcoCyc	0.0966365	11
GLUCONEO-PWY gluconeogenesis I	EcoCyc	0.0966365	17
GO:0090407 organophosphate biosynthetic process	GO	4.2694e-05	130
GO:0044283 small molecule biosynthetic process	GO	0.000513604	267
GO:0009165 nucleotide biosynthetic process	GO	0.000513604	75
GO:0006732 coenzyme metabolic process	GO	0.000513604	144
GO:0019637 organophosphate metabolic process	GO	0.000513604	199
GO:1901293 nucleoside phosphate biosynthetic process	GO	0.000513604	78
GO:0072525 pyridine-containing compound biosynthetic process	GO	0.000513604	34
GO:0008610 lipid biosynthetic process	GO	0.000513604	95
GO:0009108 coenzyme biosynthetic process	GO	0.000513604	103
GO:0006733 oxidoreduction coenzyme metabolic process	GO	0.000588507	57
GO:0019693 ribose phosphate metabolic process	GO	0.00106109	80
GO:0051186 cofactor metabolic process	GO	0.00118264	205
GO:0008654 phospholipid biosynthetic process	GO	0.00121251	36
GO:0072524 pyridine-containing compound metabolic process	GO	0.00150948	50
GO:0009260 ribonucleotide biosynthetic process	GO	0.00156522	42
GO:0006164 purine nucleotide biosynthetic process	GO	0.00173447	44
GO:0046390 ribose phosphate biosynthetic process	GO	0.00173447	44
GO:0051188 cofactor biosynthetic process	GO	0.00228646	139
GO:1901137 carbohydrate derivative biosynthetic process	GO	0.00232605	172
GO:0019359 nicotinamide nucleotide biosynthetic process	GO	0.00239635	24
GO:0044255 cellular lipid metabolic process	GO	0.00246501	130
GO:0072522 purine-containing compound biosynthetic process	GO	0.00262815	45
GO:0006753 nucleoside phosphate metabolic process	GO	0.00292086	123
GO:0006629 lipid metabolic process	GO	0.00309248	132
GO:0042181 ketone biosynthetic process	GO	0.00309248	24
GO:1901661 quinone metabolic process	GO	0.00309248	24
GO:1901663 quinone biosynthetic process	GO	0.00309248	24
GO:0006644 phospholipid metabolic process	GO	0.00331659	39
GO:1901135 carbohydrate derivative metabolic process	GO	0.0039568	284
GO:0006096 glycolytic process	GO	0.0039568	13
GO:0042866 pyruvate biosynthetic process	GO	0.0039568	13
GO:0019363 pyridine nucleotide biosynthetic process	GO	0.0039568	25
GO:0009127 purine nucleoside monophosphate biosynthetic process	GO	0.00432057	27
GO:0009168 purine ribonucleoside monophosphate biosynthetic process	GO	0.00432057	27
GO:0046496 nicotinamide nucleotide metabolic process	GO	0.00498369	40
GO:0009124 nucleoside monophosphate biosynthetic process	GO	0.00498369	31
GO:0009117 nucleotide metabolic process	GO	0.00503121	119
GO:0009152 purine ribonucleotide biosynthetic process	GO	0.00503121	38
GO:0006163 purine nucleotide metabolic process	GO	0.00698228	65
GO:0006796 phosphate-containing compound metabolic process	GO	0.00739763	247
GO:0006090 pyruvate metabolic process	GO	0.00743662	26
GO:0016051 carbohydrate biosynthetic process	GO	0.00775983	93
GO:0009156 ribonucleoside monophosphate biosynthetic process	GO	0.00780605	28
GO:0006081 cellular aldehyde metabolic process	GO	0.008126	48
GO:0044264 cellular polysaccharide metabolic process	GO	0.008126	76
GO:0019362 pyridine nucleotide metabolic process	GO	0.008126	41
GO:0009259 ribonucleotide metabolic process	GO	0.008126	64
GO:0016053 organic acid biosynthetic process	GO	0.00845652	176
GO:0046394 carboxylic acid biosynthetic process	GO	0.00845652	176
GO:0046112 nucleobase biosynthetic process	GO	0.00893402	13
GO:0006165 nucleoside diphosphate phosphorylation	GO	0.00894347	14
GO:0006757 ATP generation from ADP	GO	0.00894347	14
GO:0046939 nucleotide phosphorylation	GO	0.00894347	14
GO:0019682 glyceraldehyde-3-phosphate metabolic process	GO	0.0110029	17
GO:0043648 dicarboxylic acid metabolic process	GO	0.0116058	69
GO:0006536 glutamate metabolic process	GO	0.0123353	11
GO:0009150 purine ribonucleotide metabolic process	GO	0.0136243	56
GO:0006793 phosphorus metabolic process	GO	0.0136243	264
GO:0006281 DNA repair	GO	0.0136243	65
GO:0009185 ribonucleoside diphosphate metabolic process	GO	0.0142794	18
GO:0006221 pyrimidine nucleotide biosynthetic process	GO	0.0150274	11
GO:0005976 polysaccharide metabolic process	GO	0.0152581	80
GO:0042180 cellular ketone metabolic process	GO	0.0152581	45
GO:0005975 carbohydrate metabolic process	GO	0.0172106	229
GO:0009233 menaquinone metabolic process	GO	0.0172844	10
GO:0009234 menaquinone biosynthetic process	GO	0.0172844	10
GO:0033692 cellular polysaccharide biosynthetic process	GO	0.0199332	68
GO:0043650 dicarboxylic acid biosynthetic process	GO	0.0201737	20
GO:0034404 nucleobase-containing small molecule biosynthetic process	GO	0.0255315	43
GO:0009135 purine nucleoside diphosphate metabolic process	GO	0.0255315	17
GO:0009179 purine ribonucleoside diphosphate metabolic process	GO	0.0255315	17
GO:0046031 ADP metabolic process	GO	0.0255315	17
GO:0006073 cellular glucan metabolic process	GO	0.0263289	17
GO:0034637 cellular carbohydrate biosynthetic process	GO	0.0263289	71
GO:0051301 cell division	GO	0.0266881	61
GO:0009132 nucleoside diphosphate metabolic process	GO	0.0281014	19
GO:0000270 peptidoglycan metabolic process	GO	0.0282464	56
GO:0006022 aminoglycan metabolic process	GO	0.0282464	56
GO:0030203 glycosaminoglycan metabolic process	GO	0.0282464	56
GO:0000271 polysaccharide biosynthetic process	GO	0.0282865	70
GO:0044262 cellular carbohydrate metabolic process	GO	0.0282865	131
GO:0055086 nucleobase-containing small molecule metabolic process	GO	0.0300472	183
GO:1901566 organonitrogen compound biosynthetic process	GO	0.031153	400
GO:0009126 purine nucleoside monophosphate metabolic process	GO	0.0312561	31
GO:0009167 purine ribonucleoside monophosphate metabolic process	GO	0.0312561	31
GO:0006857 oligopeptide transport	GO	0.0347641	28
GO:0009409 response to cold	GO	0.0408207	18
GO:0072330 monocarboxylic acid biosynthetic process	GO	0.0429405	53
GO:0042455 ribonucleoside biosynthetic process	GO	0.0429405	17
GO:0042938 dipeptide transport	GO	0.0467194	16
GO:0046653 tetrahydrofolate metabolic process	GO	0.04859	13
GO:0019674 NAD metabolic process	GO	0.04859	12
GO:0072521 purine-containing compound metabolic process	GO	0.04859	77
GO:0009201 ribonucleoside triphosphate biosynthetic process	GO	0.04859	20
GO:0032502 developmental process	GO	0.04859	22
GO:0006643 membrane lipid metabolic process	GO	0.04859	13
GO:0006664 glycolipid metabolic process	GO	0.04859	13
GO:0009247 glycolipid biosynthetic process	GO	0.04859	13
GO:0046467 membrane lipid biosynthetic process	GO	0.04859	13
GO:1901269 lipooligosaccharide metabolic process	GO	0.04859	13
GO:1901271 lipooligosaccharide biosynthetic process	GO	0.04859	13
GO:1903509 liposaccharide metabolic process	GO	0.049343	49
GO:0015833 peptide transport	GO	0.0519961	69
GO:0045229 external encapsulating structure organization	GO	0.0526451	19
GO:0006206 pyrimidine nucleobase metabolic process	GO	0.0526451	23
GO:0015804 neutral amino acid transport	GO	0.0528342	32
GO:0035672 oligopeptide transmembrane transport	GO	0.0528958	20
GO:0006743 ubiquinone metabolic process	GO	0.0530776	16
GO:0006744 ubiquinone biosynthetic process	GO	0.0530776	16
GO:0046364 monosaccharide biosynthetic process	GO	0.0543846	14
GO:0000902 cell morphogenesis	GO	0.0543846	15
GO:0008360 regulation of cell shape	GO	0.0543846	15
GO:0022604 regulation of cell morphogenesis	GO	0.0543846	15
GO:0032989 cellular component morphogenesis	GO	0.0543846	15
GO:0072657 protein localization to membrane	GO	0.0581955	20
GO:0042886 amide transport	GO	0.0627371	77
GO:0009163 nucleoside biosynthetic process	GO	0.0685915	18
GO:1901659 glycosyl compound biosynthetic process	GO	0.0685915	18
GO:0051156 glucose 6-phosphate metabolic process	GO	0.0706604	12
GO:0098657 import into cell	GO	0.0706604	24
GO:0009435 NAD biosynthetic process	GO	0.0749679	11
GO:0009145 purine nucleoside triphosphate biosynthetic process	GO	0.0760296	19
GO:0009206 purine ribonucleoside triphosphate biosynthetic process	GO	0.0760296	19
GO:0015803 branched-chain amino acid transport	GO	0.0771781	11
GO:0009112 nucleobase metabolic process	GO	0.0781209	30
GO:0035442 dipeptide transmembrane transport	GO	0.0781209	11
GO:0042559 pteridine-containing compound biosynthetic process	GO	0.0797447	11
GO:0009245 lipid A biosynthetic process	GO	0.0834022	11
GO:0046493 lipid A metabolic process	GO	0.0834022	11
GO:0009123 nucleoside monophosphate metabolic process	GO	0.0856663	38
GO:0008652 cellular amino acid biosynthetic process	GO	0.0879159	109
GO:0071705 nitrogen compound transport	GO	0.0879962	205
GO:0071554 cell wall organization or biogenesis	GO	0.0889452	44
GO:0034613 cellular protein localization	GO	0.0889452	26
GO:0070727 cellular macromolecule localization	GO	0.0889452	26
GO:0098739 import across plasma membrane	GO	0.0944139	21
GO:0044036 cell wall macromolecule metabolic process	GO	0.0950988	39
GO:0006006 glucose metabolic process	GO	0.0962651	23
GO:0006826 iron ion transport	GO	0.0962651	20
GO:0044042 glucan metabolic process	GO	0.0963194	19
GO:0033013 tetrapyrrole metabolic process	GO	0.0963194	20
GO:0033014 tetrapyrrole biosynthetic process	GO	0.0963194	20
GO:0006098 pentose-phosphate shunt	GO	0.0994411	11

## Sheet: rich-5FU_S04 - Depletion
Geneset name	Database name	FDR adj pval	set.size
GO:0042255 ribosome assembly	GO	1.19985e-08	51
GO:0022618 ribonucleoprotein complex assembly	GO	1.30401e-08	52
GO:0071826 ribonucleoprotein complex subunit organization	GO	3.74885e-08	54
GO:0070925 organelle assembly	GO	2.1001e-06	61
GO:0034622 cellular protein-containing complex assembly	GO	1.11536e-05	74
GO:0000027 ribosomal large subunit assembly	GO	2.31636e-05	28
GO:0042273 ribosomal large subunit biogenesis	GO	2.31636e-05	28
GO:0006996 organelle organization	GO	0.00024778	87
GO:0042254 ribosome biogenesis	GO	0.000411302	90
GO:0022613 ribonucleoprotein complex biogenesis	GO	0.000478365	91
GO:0042274 ribosomal small subunit biogenesis	GO	0.00356553	23
GO:0009061 anaerobic respiration	GO	0.00747789	60
GO:0000028 ribosomal small subunit assembly	GO	0.0116037	20
GO:0045333 cellular respiration	GO	0.0152709	95
GO:0043711 pilus organization	GO	0.0171694	40
GO:0022900 electron transport chain	GO	0.0171694	24
GO:0065003 protein-containing complex assembly	GO	0.0202014	165
GO:0022904 respiratory electron transport chain	GO	0.024831	21
GO:0030030 cell projection organization	GO	0.0321088	50
GO:0015980 energy derivation by oxidation of organic compounds	GO	0.0486236	107
GO:1901136 carbohydrate derivative catabolic process	GO	0.0551931	50

## Sheet: rich-5FU_S15 - Enrichment
Geneset name	Database name	FDR adj pval	set.size
eco00053 Ascorbate and aldarate metabolism	KEGG	0.0175926	18
eco00780 Biotin metabolism	KEGG	0.0175926	14
eco01212 Fatty acid metabolism	KEGG	0.0212044	20
eco01120 Microbial metabolism in diverse environments	KEGG	0.0272085	260
eco00061 Fatty acid biosynthesis	KEGG	0.0272085	13
eco00620 Pyruvate metabolism	KEGG	0.0276975	53
eco00240 Pyrimidine metabolism	KEGG	0.0315568	51
eco00360 Phenylalanine metabolism	KEGG	0.0376334	30
eco00970 Aminoacyl-tRNA biosynthesis	KEGG	0.0508287	26
eco00290 Valine, leucine and isoleucine biosynthesis	KEGG	0.0578737	16
eco00260 Glycine, serine and threonine metabolism	KEGG	0.0579701	37
eco00650 Butanoate metabolism	KEGG	0.0579701	37
eco00051 Fructose and mannose metabolism	KEGG	0.059271	38
eco00330 Arginine and proline metabolism	KEGG	0.078488	25
eco00730 Thiamine metabolism	KEGG	0.097382	14
eco00310 Lysine degradation	KEGG	0.097382	17
GO:0006355 regulation of transcription, DNA-templated	GO	0.00496941	220
GO:1903506 regulation of nucleic acid-templated transcription	GO	0.00496941	220
GO:2001141 regulation of RNA biosynthetic process	GO	0.00496941	220
GO:0051704 multi-organism process	GO	0.00496941	135
GO:0051252 regulation of RNA metabolic process	GO	0.00496941	232
GO:0044764 multi-organism cellular process	GO	0.00496941	107
GO:0051171 regulation of nitrogen compound metabolic process	GO	0.00496941	295
GO:0042710 biofilm formation	GO	0.00496941	97
GO:2000112 regulation of cellular macromolecule biosynthetic process	GO	0.00496941	263
GO:0006351 transcription, DNA-templated	GO	0.00496941	283
GO:0097659 nucleic acid-templated transcription	GO	0.00496941	283
GO:0031326 regulation of cellular biosynthetic process	GO	0.00505519	266
GO:0032774 RNA biosynthetic process	GO	0.00505519	286
GO:0009889 regulation of biosynthetic process	GO	0.00539331	269
GO:0019219 regulation of nucleobase-containing compound metabolic process	GO	0.00539331	247
GO:0010556 regulation of macromolecule biosynthetic process	GO	0.00539331	265
GO:0080090 regulation of primary metabolic process	GO	0.00583136	304
GO:0051254 positive regulation of RNA metabolic process	GO	0.00707859	74
GO:0045893 positive regulation of transcription, DNA-templated	GO	0.00711271	71
GO:1902680 positive regulation of RNA biosynthetic process	GO	0.00711271	71
GO:1903508 positive regulation of nucleic acid-templated transcription	GO	0.00711271	71
GO:0031323 regulation of cellular metabolic process	GO	0.00711271	302
GO:0010468 regulation of gene expression	GO	0.00711271	275
GO:0060255 regulation of macromolecule metabolic process	GO	0.00711271	312
GO:0090605 submerged biofilm formation	GO	0.00711271	47
GO:1901700 response to oxygen-containing compound	GO	0.00711271	67
GO:0007155 cell adhesion	GO	0.00711271	41
GO:0009607 response to biotic stimulus	GO	0.00711271	13
GO:0009615 response to virus	GO	0.00711271	13
GO:0043207 response to external biotic stimulus	GO	0.00711271	13
GO:0051707 response to other organism	GO	0.00711271	13
GO:0048522 positive regulation of cellular process	GO	0.00820592	102
GO:0043711 pilus organization	GO	0.00985418	40
GO:0044010 single-species biofilm formation	GO	0.0178982	71
GO:0090609 single-species submerged biofilm formation	GO	0.0182062	42
GO:0019222 regulation of metabolic process	GO	0.0182062	330
GO:0045935 positive regulation of nucleobase-containing compound metabolic process	GO	0.0217695	78
GO:0050794 regulation of cellular process	GO	0.0262238	412
GO:0031325 positive regulation of cellular metabolic process	GO	0.0275804	93
GO:0010628 positive regulation of gene expression	GO	0.0300195	81
GO:0044092 negative regulation of molecular function	GO	0.0318015	23
GO:0009891 positive regulation of biosynthetic process	GO	0.0318015	82
GO:0031328 positive regulation of cellular biosynthetic process	GO	0.0318015	80
GO:0051173 positive regulation of nitrogen compound metabolic process	GO	0.0318015	91
GO:0022610 biological adhesion	GO	0.0318015	45
GO:0050789 regulation of biological process	GO	0.0357689	447
GO:0048518 positive regulation of biological process	GO	0.0367179	116
GO:0040011 locomotion	GO	0.0367179	65
GO:0043708 cell adhesion involved in biofilm formation	GO	0.0367179	32
GO:0000302 response to reactive oxygen species	GO	0.0400809	34
GO:0010557 positive regulation of macromolecule biosynthetic process	GO	0.0400809	81
GO:0022900 electron transport chain	GO	0.0466262	24
GO:0033554 cellular response to stress	GO	0.0480148	336
GO:0051271 negative regulation of cellular component movement	GO	0.0506827	10
GO:0046185 aldehyde catabolic process	GO	0.0530646	16
GO:0097237 cellular response to toxic substance	GO	0.0532628	16
GO:0009605 response to external stimulus	GO	0.0532628	91
GO:0006928 movement of cell or subcellular component	GO	0.0532628	62
GO:0010604 positive regulation of macromolecule metabolic process	GO	0.058042	93
GO:0031589 cell-substrate adhesion	GO	0.0616071	34
GO:0042135 neurotransmitter catabolic process	GO	0.0636219	13
GO:0048519 negative regulation of biological process	GO	0.0636219	181
GO:0006857 oligopeptide transport	GO	0.0642041	28
GO:0009893 positive regulation of metabolic process	GO	0.0642204	100
GO:0043709 cell adhesion involved in single-species biofilm formation	GO	0.0809742	27
GO:0006352 DNA-templated transcription, initiation	GO	0.0890895	25
GO:0042542 response to hydrogen peroxide	GO	0.0977789	18
GO:0031334 positive regulation of protein complex assembly	GO	0.0978773	12
GO:2000144 positive regulation of DNA-templated transcription, initiation	GO	0.0978773	12
GO:1901701 cellular response to oxygen-containing compound	GO	0.0978773	27
GO:0001539 cilium or flagellum-dependent cell motility	GO	0.0978773	45
GO:0071973 bacterial-type flagellum-dependent cell motility	GO	0.0978773	45
GO:0097588 archaeal or bacterial-type flagellum-dependent cell motility	GO	0.0978773	45
GO:0048870 cell motility	GO	0.0978773	52
GO:0051674 localization of cell	GO	0.0978773	52

## Sheet: rich-5FU_S15 - Depletion
Geneset name	Database name	FDR adj pval	set.size
TRNA-CHARGING-PWY tRNA charging	EcoCyc	0.00043442	24
BIOTIN-BIOSYNTHESIS-PWY biotin biosynthesis I	EcoCyc	0.000884084	12
THISYN-PWY superpathway of thiamine diphosphate biosynthesis I	EcoCyc	0.000932203	13
PWY0-321 phenylacetate degradation I (aerobic)	EcoCyc	0.00223582	10
PWY-6071 superpathway of phenylethylamine degradation	EcoCyc	0.0105602	12
PWY0-1277 3-phenylpropanoate and 3-(3-hydroxyphenyl)propanoate degradation	EcoCyc	0.0105602	13
BRANCHED-CHAIN-AA-SYN-PWY superpathway of branched chain amino acid biosynthesis	EcoCyc	0.0105602	17
PWY0-881 superpathway of fatty acid biosynthesis I (E. coli)	EcoCyc	0.0112369	11
COMPLETE-ARO-PWY superpathway of aromatic amino acid biosynthesis	EcoCyc	0.0140416	21
PWY-6126 superpathway of adenosine nucleotides <i>de novo</i> biosynthesis II	EcoCyc	0.0151307	12
ECASYN-PWY enterobacterial common antigen biosynthesis	EcoCyc	0.0212168	11
GLUTAMINDEG-PWY L-glutamine degradation I	EcoCyc	0.0212168	11
ARO-PWY chorismate biosynthesis I	EcoCyc	0.02971	11
THREOCAT-PWY superpathway of L-threonine metabolism	EcoCyc	0.0327076	24
ALL-CHORISMATE-PWY superpathway of chorismate metabolism	EcoCyc	0.0335884	59
PWY0-1335 NADH to cytochrome <i>bo</i> oxidase electron transfer I	EcoCyc	0.0335884	17
PEPTIDOGLYCANSYN-PWY peptidoglycan biosynthesis I (<I>meso</I>-diaminopimelate containing)	EcoCyc	0.0335884	11
PWY-7222 guanosine deoxyribonucleotides <i>de novo</i> biosynthesis II	EcoCyc	0.0352306	10
PWY0-781 aspartate superpathway	EcoCyc	0.0377779	27
PWY-7184 pyrimidine deoxyribonucleotides <i>de novo</i> biosynthesis I	EcoCyc	0.0408062	13
PWY-7892 tRNA-uridine 2-thiolation and selenation (bacteria)	EcoCyc	0.0497696	12
FERMENTATION-PWY mixed acid fermentation	EcoCyc	0.0516251	33
PWY0-166 superpathway of pyrimidine deoxyribonucleotides <i>de novo</i> biosynthesis (<i>E. coli</i>)	EcoCyc	0.0837927	16
P4-PWY \superpathway of L-lysine"	EcoCyc	0.0958428	21
GO:1901566 organonitrogen compound biosynthetic process	GO	1.56114e-13	400
GO:0034660 ncRNA metabolic process	GO	1.83538e-10	117
GO:0009266 response to temperature stimulus	GO	2.18176e-08	81
GO:0006399 tRNA metabolic process	GO	2.18176e-08	77
GO:0034470 ncRNA processing	GO	2.18176e-08	91
GO:0019752 carboxylic acid metabolic process	GO	7.77728e-08	410
GO:0006396 RNA processing	GO	1.55199e-07	98
GO:0009451 RNA modification	GO	2.82803e-07	77
GO:0006082 organic acid metabolic process	GO	3.60623e-07	430
GO:0022613 ribonucleoprotein complex biogenesis	GO	3.60623e-07	91
GO:0043436 oxoacid metabolic process	GO	4.02587e-07	419
GO:0042254 ribosome biogenesis	GO	4.24522e-07	90
GO:0044283 small molecule biosynthetic process	GO	1.18949e-06	267
GO:0006996 organelle organization	GO	1.7669e-06	87
GO:0016053 organic acid biosynthetic process	GO	1.82369e-06	176
GO:0046394 carboxylic acid biosynthetic process	GO	1.82369e-06	176
GO:0009408 response to heat	GO	3.05456e-06	60
GO:0006400 tRNA modification	GO	3.50158e-06	46
GO:0044272 sulfur compound biosynthetic process	GO	5.80086e-06	38
GO:0008033 tRNA processing	GO	7.4338e-06	53
GO:0070925 organelle assembly	GO	1.16113e-05	61
GO:0008652 cellular amino acid biosynthetic process	GO	1.36723e-05	109
GO:0006766 vitamin metabolic process	GO	1.63027e-05	60
GO:0009628 response to abiotic stimulus	GO	1.86689e-05	234
GO:0006520 cellular amino acid metabolic process	GO	2.35317e-05	198
GO:0006767 water-soluble vitamin metabolic process	GO	2.5549e-05	59
GO:0043604 amide biosynthetic process	GO	9.96973e-05	122
GO:0009110 vitamin biosynthetic process	GO	0.000106667	49
GO:0071826 ribonucleoprotein complex subunit organization	GO	0.000106667	54
GO:0043603 cellular amide metabolic process	GO	0.000107992	161
GO:0016072 rRNA metabolic process	GO	0.000109984	44
GO:0010817 regulation of hormone levels	GO	0.000123917	14
GO:0042445 hormone metabolic process	GO	0.000123917	14
GO:0032259 methylation	GO	0.000123917	41
GO:0043414 macromolecule methylation	GO	0.000123917	41
GO:1901607 alpha-amino acid biosynthetic process	GO	0.000123917	96
GO:0042364 water-soluble vitamin biosynthetic process	GO	0.000145716	48
GO:0006364 rRNA processing	GO	0.000146226	43
GO:0022618 ribonucleoprotein complex assembly	GO	0.000162782	52
GO:0042255 ribosome assembly	GO	0.000225877	51
GO:0032787 monocarboxylic acid metabolic process	GO	0.000225877	176
GO:1901137 carbohydrate derivative biosynthetic process	GO	0.000255013	172
GO:0042537 benzene-containing compound metabolic process	GO	0.000255013	22
GO:0009850 auxin metabolic process	GO	0.000388106	13
GO:0009852 auxin catabolic process	GO	0.000388106	13
GO:0010124 phenylacetate catabolic process	GO	0.000388106	13
GO:0042447 hormone catabolic process	GO	0.000388106	13
GO:0043412 macromolecule modification	GO	0.000424927	199
GO:0017144 drug metabolic process	GO	0.000458413	183
GO:0033036 macromolecule localization	GO	0.000460669	72
GO:0051186 cofactor metabolic process	GO	0.000569987	205
GO:0015801 aromatic amino acid transport	GO	0.000569987	10
GO:0006732 coenzyme metabolic process	GO	0.000571816	144
GO:0051188 cofactor biosynthetic process	GO	0.000604524	139
GO:0009407 toxin catabolic process	GO	0.000648898	16
GO:0001510 RNA methylation	GO	0.000741638	34
GO:0045229 external encapsulating structure organization	GO	0.000741638	19
GO:0044085 cellular component biogenesis	GO	0.000753455	300
GO:0042178 xenobiotic catabolic process	GO	0.000785318	19
GO:0000154 rRNA modification	GO	0.000811441	31
GO:0031167 rRNA methylation	GO	0.000811441	23
GO:0006418 tRNA aminoacylation for protein translation	GO	0.000811441	23
GO:0043039 tRNA aminoacylation	GO	0.000811441	23
GO:0072330 monocarboxylic acid biosynthetic process	GO	0.000815994	53
GO:0071103 DNA conformation change	GO	0.000928994	14
GO:0044255 cellular lipid metabolic process	GO	0.00103119	130
GO:0043038 amino acid activation	GO	0.00210898	24
GO:0009228 thiamine biosynthetic process	GO	0.00210898	10
GO:0042724 thiamine-containing compound biosynthetic process	GO	0.00210898	10
GO:0034622 cellular protein-containing complex assembly	GO	0.00210898	74
GO:0006629 lipid metabolic process	GO	0.00210898	132
GO:0043043 peptide biosynthetic process	GO	0.00254274	94
GO:0009108 coenzyme biosynthetic process	GO	0.00259998	103
GO:0070475 rRNA base methylation	GO	0.00286713	19
GO:1901135 carbohydrate derivative metabolic process	GO	0.00291598	284
GO:0006772 thiamine metabolic process	GO	0.00394254	12
GO:0042723 thiamine-containing compound metabolic process	GO	0.00394254	12
GO:0006298 mismatch repair	GO	0.00394254	10
GO:0006631 fatty acid metabolic process	GO	0.00417721	52
GO:0009410 response to xenobiotic stimulus	GO	0.00431434	24
GO:0009404 toxin metabolic process	GO	0.00435629	19
GO:0071840 cellular component organization or biogenesis	GO	0.00438898	405
GO:0009409 response to cold	GO	0.00438898	18
GO:0006518 peptide metabolic process	GO	0.00452375	111
GO:0006633 fatty acid biosynthetic process	GO	0.00455148	22
GO:0017004 cytochrome complex assembly	GO	0.00502545	10
GO:0072528 pyrimidine-containing compound biosynthetic process	GO	0.00533696	26
GO:0006259 DNA metabolic process	GO	0.00553382	132
GO:1901605 alpha-amino acid metabolic process	GO	0.00621244	158
GO:0000027 ribosomal large subunit assembly	GO	0.00621244	28
GO:0042273 ribosomal large subunit biogenesis	GO	0.00621244	28
GO:0002097 tRNA wobble base modification	GO	0.00751126	19
GO:0006793 phosphorus metabolic process	GO	0.00751126	264
GO:0043163 cell envelope organization	GO	0.00804218	11
GO:0043165 Gram-negative-bacterium-type cell outer membrane assembly	GO	0.00804218	11
GO:0044091 membrane biogenesis	GO	0.00804218	11
GO:0071709 membrane assembly	GO	0.00804218	11
GO:0006805 xenobiotic metabolic process	GO	0.00804587	23
GO:0071466 cellular response to xenobiotic stimulus	GO	0.00804587	23
GO:0006260 DNA replication	GO	0.0089485	36
GO:0009314 response to radiation	GO	0.00913797	94
GO:0019748 secondary metabolic process	GO	0.00984661	32
GO:0006261 DNA-dependent DNA replication	GO	0.0101206	33
GO:0045184 establishment of protein localization	GO	0.0101716	37
GO:0006281 DNA repair	GO	0.0126381	65
GO:0009073 aromatic amino acid family biosynthetic process	GO	0.0131708	26
GO:0006310 DNA recombination	GO	0.0157513	41
GO:0019220 regulation of phosphate metabolic process	GO	0.0165964	10
GO:0051174 regulation of phosphorus metabolic process	GO	0.0165964	10
GO:0043650 dicarboxylic acid biosynthetic process	GO	0.0174894	20
GO:0006412 translation	GO	0.0176518	83
GO:0008610 lipid biosynthetic process	GO	0.0193619	95
GO:0009067 aspartate family amino acid biosynthetic process	GO	0.0195698	27
GO:0008104 protein localization	GO	0.0196413	42
GO:0051276 chromosome organization	GO	0.0221922	22
GO:0019637 organophosphate metabolic process	GO	0.024644	199
GO:0016311 dephosphorylation	GO	0.0316166	16
GO:0009066 aspartate family amino acid metabolic process	GO	0.0319467	49
GO:0009082 branched-chain amino acid biosynthetic process	GO	0.0361641	17
GO:0016226 iron-sulfur cluster assembly	GO	0.0365954	17
GO:0006644 phospholipid metabolic process	GO	0.0365954	39
GO:0006457 protein folding	GO	0.0413316	37
GO:0019538 protein metabolic process	GO	0.0424555	282
GO:0006790 sulfur compound metabolic process	GO	0.0428729	93
GO:0006796 phosphate-containing compound metabolic process	GO	0.0435367	247
GO:1903509 liposaccharide metabolic process	GO	0.0452807	49
GO:0071554 cell wall organization or biogenesis	GO	0.0462338	44
GO:0002098 tRNA wobble uridine modification	GO	0.0462338	13
GO:0042274 ribosomal small subunit biogenesis	GO	0.0496317	23
GO:0031163 metallo-sulfur cluster assembly	GO	0.0510481	18
GO:0006811 ion transport	GO	0.0530098	250
GO:0044038 cell wall macromolecule biosynthetic process	GO	0.0539125	35
GO:0070589 cellular component macromolecule biosynthetic process	GO	0.0539125	35
GO:0051205 protein insertion into membrane	GO	0.0539125	10
GO:0034613 cellular protein localization	GO	0.0539125	26
GO:0070727 cellular macromolecule localization	GO	0.0539125	26
GO:0015803 branched-chain amino acid transport	GO	0.0607817	11
GO:0006023 aminoglycan biosynthetic process	GO	0.0607817	32
GO:0006024 glycosaminoglycan biosynthetic process	GO	0.0607817	32
GO:0009252 peptidoglycan biosynthetic process	GO	0.0607817	32
GO:0044036 cell wall macromolecule metabolic process	GO	0.0607817	39
GO:0000902 cell morphogenesis	GO	0.0607817	15
GO:0008360 regulation of cell shape	GO	0.0607817	15
GO:0022604 regulation of cell morphogenesis	GO	0.0607817	15
GO:0032989 cellular component morphogenesis	GO	0.0607817	15
GO:0015031 protein transport	GO	0.0607817	30
GO:0030163 protein catabolic process	GO	0.0607817	16
GO:1901617 organic hydroxy compound biosynthetic process	GO	0.062861	26
GO:0061024 membrane organization	GO	0.0631899	26
GO:0006643 membrane lipid metabolic process	GO	0.0631899	13
GO:0006664 glycolipid metabolic process	GO	0.0631899	13
GO:0009247 glycolipid biosynthetic process	GO	0.0631899	13
GO:0046467 membrane lipid biosynthetic process	GO	0.0631899	13
GO:1901269 lipooligosaccharide metabolic process	GO	0.0631899	13
GO:1901271 lipooligosaccharide biosynthetic process	GO	0.0631899	13
GO:0015949 nucleobase-containing small molecule interconversion	GO	0.0673544	21
GO:0000270 peptidoglycan metabolic process	GO	0.0706026	56
GO:0006022 aminoglycan metabolic process	GO	0.0706026	56
GO:0030203 glycosaminoglycan metabolic process	GO	0.0706026	56
GO:0009084 glutamine family amino acid biosynthetic process	GO	0.0706026	21
GO:0009064 glutamine family amino acid metabolic process	GO	0.077907	43
GO:0071806 protein transmembrane transport	GO	0.0801047	17
GO:0006820 anion transport	GO	0.0801047	160
GO:0065008 regulation of biological quality	GO	0.0826816	123
GO:0042546 cell wall biogenesis	GO	0.0851352	40
GO:0000028 ribosomal small subunit assembly	GO	0.0853381	20
GO:0090407 organophosphate biosynthetic process	GO	0.0853381	130
GO:0000097 sulfur amino acid biosynthetic process	GO	0.0863834	12
GO:0016999 antibiotic metabolic process	GO	0.0863834	56
GO:0009273 peptidoglycan-based cell wall biogenesis	GO	0.0918064	37
GO:0006869 lipid transport	GO	0.0921712	25
GO:0008654 phospholipid biosynthetic process	GO	0.0955489	36
GO:0072348 sulfur compound transport	GO	0.0988123	34
GO:0044257 cellular protein catabolic process	GO	0.0996616	10
GO:1902600 proton transmembrane transport	GO	0.0996616	17
GO:0019634 organic phosphonate metabolic process	GO	0.0996616	10

## Sheet: rich-5FU_S16 - Enrichment
Geneset name	Database name	FDR adj pval	set.size
eco03010 Ribosome	KEGG	3.97051e-20	56
eco02010 ABC transporters	KEGG	0.0379055	178
eco00970 Aminoacyl-tRNA biosynthesis	KEGG	0.0379055	26
eco00310 Lysine degradation	KEGG	0.0713714	17
ORNARGDEG-PWY superpathway of L-arginine and L-ornithine degradation	EcoCyc	0.0420778	14
ARGDEG-PWY \superpathway of L-arginine"	EcoCyc	0.0420778	12
GO:0044764 multi-organism cellular process	GO	0.0123941	107
GO:0006576 cellular biogenic amine metabolic process	GO	0.0123941	29
GO:0051704 multi-organism process	GO	0.0135019	135
GO:0090605 submerged biofilm formation	GO	0.0135019	47
GO:0042710 biofilm formation	GO	0.0135019	97
GO:0006857 oligopeptide transport	GO	0.0135019	28
GO:0006979 response to oxidative stress	GO	0.0135191	87
GO:0009308 amine metabolic process	GO	0.0135191	31
GO:0044106 cellular amine metabolic process	GO	0.0135191	31
GO:0022610 biological adhesion	GO	0.0135191	45
GO:0090609 single-species submerged biofilm formation	GO	0.0135191	42
GO:1901700 response to oxygen-containing compound	GO	0.0216868	67
GO:0044010 single-species biofilm formation	GO	0.0227442	71
GO:0007155 cell adhesion	GO	0.0227442	41
GO:0006950 response to stress	GO	0.0274068	496
GO:0048522 positive regulation of cellular process	GO	0.0295374	102
GO:0009605 response to external stimulus	GO	0.0314131	91
GO:0009445 putrescine metabolic process	GO	0.034559	10
GO:0006826 iron ion transport	GO	0.0346436	20
GO:0009607 response to biotic stimulus	GO	0.0352207	13
GO:0009615 response to virus	GO	0.0352207	13
GO:0043207 response to external biotic stimulus	GO	0.0352207	13
GO:0051707 response to other organism	GO	0.0352207	13
GO:0035672 oligopeptide transmembrane transport	GO	0.0367201	20
GO:0046185 aldehyde catabolic process	GO	0.0367201	16
GO:0043711 pilus organization	GO	0.0367201	40
GO:0033554 cellular response to stress	GO	0.0403496	336
GO:0031589 cell-substrate adhesion	GO	0.0403496	34
GO:0006568 tryptophan metabolic process	GO	0.0403496	11
GO:0006586 indolalkylamine metabolic process	GO	0.0403496	11
GO:0042430 indole-containing compound metabolic process	GO	0.0403496	11
GO:0044282 small molecule catabolic process	GO	0.0403509	218
GO:0015893 drug transport	GO	0.0526842	79
GO:0043708 cell adhesion involved in biofilm formation	GO	0.0528603	32
GO:0051254 positive regulation of RNA metabolic process	GO	0.0556331	74
GO:0044011 single-species biofilm formation on inanimate substrate	GO	0.0556331	15
GO:0051703 intraspecies interaction between organisms	GO	0.0556331	15
GO:0042221 response to chemical	GO	0.0556331	327
GO:0045893 positive regulation of transcription, DNA-templated	GO	0.0556331	71
GO:1902680 positive regulation of RNA biosynthetic process	GO	0.0556331	71
GO:1903508 positive regulation of nucleic acid-templated transcription	GO	0.0556331	71
GO:0042938 dipeptide transport	GO	0.0556331	16
GO:0019395 fatty acid oxidation	GO	0.0556331	19
GO:0034440 lipid oxidation	GO	0.0556331	19
GO:0015850 organic hydroxy compound transport	GO	0.0556331	23
GO:0097237 cellular response to toxic substance	GO	0.0556331	16
GO:0046395 carboxylic acid catabolic process	GO	0.0556331	143
GO:0051271 negative regulation of cellular component movement	GO	0.0556331	10
GO:0030091 protein repair	GO	0.0557275	11
GO:0006595 polyamine metabolic process	GO	0.0597363	15
GO:0031325 positive regulation of cellular metabolic process	GO	0.0607718	93
GO:0006972 hyperosmotic response	GO	0.0657199	14
GO:0000302 response to reactive oxygen species	GO	0.0708149	34
GO:0015688 iron chelate transport	GO	0.0708149	17
GO:0015891 siderophore transport	GO	0.0708149	17
GO:0030030 cell projection organization	GO	0.0708149	50
GO:0009891 positive regulation of biosynthetic process	GO	0.0708149	82
GO:0043709 cell adhesion involved in single-species biofilm formation	GO	0.0807869	27
GO:0048518 positive regulation of biological process	GO	0.0810678	116
GO:0009309 amine biosynthetic process	GO	0.0840295	14
GO:0042401 cellular biogenic amine biosynthetic process	GO	0.0840295	14
GO:0010557 positive regulation of macromolecule biosynthetic process	GO	0.0840295	81
GO:0051173 positive regulation of nitrogen compound metabolic process	GO	0.0840295	91
GO:0051130 positive regulation of cellular component organization	GO	0.0840295	17
GO:0016054 organic acid catabolic process	GO	0.0840295	151
GO:0030258 lipid modification	GO	0.0864336	22
GO:1901616 organic hydroxy compound catabolic process	GO	0.0864336	25
GO:0045935 positive regulation of nucleobase-containing compound metabolic process	GO	0.0903795	78

## Sheet: rich-5FU_S16 - Depletion
Geneset name	Database name	FDR adj pval	set.size
TRNA-CHARGING-PWY tRNA charging	EcoCyc	8.8212e-07	24
PWY-6126 superpathway of adenosine nucleotides <i>de novo</i> biosynthesis II	EcoCyc	0.00157405	12
PWY-6125 superpathway of guanosine nucleotides <i>de novo</i> biosynthesis II	EcoCyc	0.00286123	13
BIOTIN-BIOSYNTHESIS-PWY biotin biosynthesis I	EcoCyc	0.00286123	12
THISYN-PWY superpathway of thiamine diphosphate biosynthesis I	EcoCyc	0.00286123	13
PWY-7222 guanosine deoxyribonucleotides <i>de novo</i> biosynthesis II	EcoCyc	0.0043194	10
PWY0-881 superpathway of fatty acid biosynthesis I (E. coli)	EcoCyc	0.0151351	11
PWY0-1335 NADH to cytochrome <i>bo</i> oxidase electron transfer I	EcoCyc	0.0151351	17
PWY0-166 superpathway of pyrimidine deoxyribonucleotides <i>de novo</i> biosynthesis (<i>E. coli</i>)	EcoCyc	0.0210213	16
THREOCAT-PWY superpathway of L-threonine metabolism	EcoCyc	0.0232738	24
PWY-7184 pyrimidine deoxyribonucleotides <i>de novo</i> biosynthesis I	EcoCyc	0.0240776	13
LPSSYN-PWY superpathway of lipopolysaccharide biosynthesis	EcoCyc	0.0284342	24
PWY-7892 tRNA-uridine 2-thiolation and selenation (bacteria)	EcoCyc	0.0301212	12
PWY0-1585 formate to nitrite electron transfer	EcoCyc	0.0392525	10
DENOVOPURINE2-PWY superpathway of purine nucleotides <i>de novo</i> biosynthesis II	EcoCyc	0.0401257	24
PRPP-PWY \superpathway of histidine"	EcoCyc	0.0401257	43
PWY0-781 aspartate superpathway	EcoCyc	0.0401257	27
PWY0-1277 3-phenylpropanoate and 3-(3-hydroxyphenyl)propanoate degradation	EcoCyc	0.0408854	13
OANTIGEN-PWY <i>O</i>-antigen building blocks biosynthesis (<i>E. coli</i>)	EcoCyc	0.0614599	11
P4-PWY \superpathway of L-lysine"	EcoCyc	0.0648488	21
PWY0-1348 NADH to dimethyl sulfoxide electron transfer	EcoCyc	0.0649226	16
PWY-7211 superpathway of pyrimidine deoxyribonucleotides <i>de novo</i> biosynthesis	EcoCyc	0.0697769	23
NONMEVIPP-PWY methylerythritol phosphate pathway I	EcoCyc	0.0700303	11
ALL-CHORISMATE-PWY superpathway of chorismate metabolism	EcoCyc	0.0700303	59
PWY-7196 superpathway of pyrimidine ribonucleosides salvage	EcoCyc	0.0700303	11
ECASYN-PWY enterobacterial common antigen biosynthesis	EcoCyc	0.0764492	11
KDO-NAGLIPASYN-PWY superpathway of (Kdo)<SUB>2</SUB>-lipid A biosynthesis	EcoCyc	0.0764492	16
PWY0-1590 NADH to hydrogen peroxide electron transfer	EcoCyc	0.0777382	14
PWY0-1321 nitrate reduction III (dissimilatory)	EcoCyc	0.0821118	12
ARO-PWY chorismate biosynthesis I	EcoCyc	0.0871747	11
BRANCHED-CHAIN-AA-SYN-PWY superpathway of branched chain amino acid biosynthesis	EcoCyc	0.0955266	17
GO:0042254 ribosome biogenesis	GO	2.72271e-21	90
GO:0022613 ribonucleoprotein complex biogenesis	GO	4.82713e-21	91
GO:0034622 cellular protein-containing complex assembly	GO	4.65133e-19	74
GO:0042255 ribosome assembly	GO	3.40895e-18	51
GO:0022618 ribonucleoprotein complex assembly	GO	9.35782e-18	52
GO:0071826 ribonucleoprotein complex subunit organization	GO	1.55896e-17	54
GO:0006996 organelle organization	GO	3.72048e-16	87
GO:0070925 organelle assembly	GO	6.9141e-16	61
GO:0034660 ncRNA metabolic process	GO	2.1147e-15	117
GO:1901566 organonitrogen compound biosynthetic process	GO	3.93924e-14	400
GO:0034470 ncRNA processing	GO	2.46577e-13	91
GO:0006396 RNA processing	GO	3.14966e-12	98
GO:0065003 protein-containing complex assembly	GO	4.19093e-10	165
GO:0009451 RNA modification	GO	5.98533e-10	77
GO:0043933 protein-containing complex subunit organization	GO	5.98533e-10	190
GO:0006399 tRNA metabolic process	GO	6.94847e-10	77
GO:0042274 ribosomal small subunit biogenesis	GO	2.38781e-09	23
GO:0044283 small molecule biosynthetic process	GO	5.55122e-09	267
GO:0043604 amide biosynthetic process	GO	5.55199e-09	122
GO:0000028 ribosomal small subunit assembly	GO	6.87904e-09	20
GO:0006412 translation	GO	9.94978e-09	83
GO:0000027 ribosomal large subunit assembly	GO	1.01009e-08	28
GO:0042273 ribosomal large subunit biogenesis	GO	1.01009e-08	28
GO:0006364 rRNA processing	GO	1.43159e-08	43
GO:0016072 rRNA metabolic process	GO	1.87531e-08	44
GO:0071840 cellular component organization or biogenesis	GO	4.423e-08	405
GO:0044085 cellular component biogenesis	GO	5.14108e-08	300
GO:1901137 carbohydrate derivative biosynthetic process	GO	1.54912e-07	172
GO:0022607 cellular component assembly	GO	1.54912e-07	223
GO:0043043 peptide biosynthetic process	GO	2.13813e-07	94
GO:0008033 tRNA processing	GO	2.58086e-07	53
GO:0006400 tRNA modification	GO	3.6283e-07	46
GO:0016053 organic acid biosynthetic process	GO	5.64064e-07	176
GO:0046394 carboxylic acid biosynthetic process	GO	5.64064e-07	176
GO:0006518 peptide metabolic process	GO	7.11008e-07	111
GO:0016043 cellular component organization	GO	1.36089e-06	342
GO:0017004 cytochrome complex assembly	GO	3.54905e-06	10
GO:0000154 rRNA modification	GO	4.89927e-06	31
GO:0032259 methylation	GO	7.78849e-06	41
GO:0043414 macromolecule methylation	GO	7.78849e-06	41
GO:0006766 vitamin metabolic process	GO	8.76958e-06	60
GO:0001510 RNA methylation	GO	1.03386e-05	34
GO:0006767 water-soluble vitamin metabolic process	GO	1.5178e-05	59
GO:0043603 cellular amide metabolic process	GO	1.69567e-05	161
GO:0009110 vitamin biosynthetic process	GO	1.95162e-05	49
GO:1901135 carbohydrate derivative metabolic process	GO	2.50451e-05	284
GO:0042364 water-soluble vitamin biosynthetic process	GO	3.46973e-05	48
GO:0006418 tRNA aminoacylation for protein translation	GO	4.3958e-05	23
GO:0043039 tRNA aminoacylation	GO	4.3958e-05	23
GO:0070475 rRNA base methylation	GO	5.60041e-05	19
GO:0031167 rRNA methylation	GO	6.13183e-05	23
GO:0043038 amino acid activation	GO	0.000139989	24
GO:0019538 protein metabolic process	GO	0.000169725	282
GO:0051188 cofactor biosynthetic process	GO	0.000254974	139
GO:0044267 cellular protein metabolic process	GO	0.000254974	232
GO:0044272 sulfur compound biosynthetic process	GO	0.000354954	38
GO:0008610 lipid biosynthetic process	GO	0.000451905	95
GO:0072330 monocarboxylic acid biosynthetic process	GO	0.000530062	53
GO:0055086 nucleobase-containing small molecule metabolic process	GO	0.000530062	183
GO:0042455 ribonucleoside biosynthetic process	GO	0.00075754	17
GO:0043412 macromolecule modification	GO	0.000829091	199
GO:1901657 glycosyl compound metabolic process	GO	0.0009507	39
GO:0006732 coenzyme metabolic process	GO	0.0012049	144
GO:0009108 coenzyme biosynthetic process	GO	0.00134863	103
GO:0006298 mismatch repair	GO	0.00145022	10
GO:0006633 fatty acid biosynthetic process	GO	0.00145022	22
GO:0009165 nucleotide biosynthetic process	GO	0.00150605	75
GO:0009260 ribonucleotide biosynthetic process	GO	0.00150605	42
GO:0009116 nucleoside metabolic process	GO	0.00150605	38
GO:0009152 purine ribonucleotide biosynthetic process	GO	0.00162174	38
GO:0051186 cofactor metabolic process	GO	0.00167378	205
GO:0009228 thiamine biosynthetic process	GO	0.00229005	10
GO:0042724 thiamine-containing compound biosynthetic process	GO	0.00229005	10
GO:0009163 nucleoside biosynthetic process	GO	0.00229005	18
GO:1901659 glycosyl compound biosynthetic process	GO	0.00229005	18
GO:0034404 nucleobase-containing small molecule biosynthetic process	GO	0.00229005	43
GO:0072522 purine-containing compound biosynthetic process	GO	0.00229005	45
GO:0019637 organophosphate metabolic process	GO	0.00229005	199
GO:0071103 DNA conformation change	GO	0.00269026	14
GO:0009119 ribonucleoside metabolic process	GO	0.00312071	34
GO:0015803 branched-chain amino acid transport	GO	0.00381505	11
GO:0046390 ribose phosphate biosynthetic process	GO	0.00384054	44
GO:0033036 macromolecule localization	GO	0.00384054	72
GO:0006261 DNA-dependent DNA replication	GO	0.00384054	33
GO:0002098 tRNA wobble uridine modification	GO	0.00391258	13
GO:0006164 purine nucleotide biosynthetic process	GO	0.00391694	44
GO:1901293 nucleoside phosphate biosynthetic process	GO	0.00398666	78
GO:0006772 thiamine metabolic process	GO	0.00398666	12
GO:0042723 thiamine-containing compound metabolic process	GO	0.00398666	12
GO:0090407 organophosphate biosynthetic process	GO	0.00441423	130
GO:0006260 DNA replication	GO	0.00459589	36
GO:0002097 tRNA wobble base modification	GO	0.00517661	19
GO:0008652 cellular amino acid biosynthetic process	GO	0.00539706	109
GO:0009409 response to cold	GO	0.00653265	18
GO:0015949 nucleobase-containing small molecule interconversion	GO	0.00712701	21
GO:0006259 DNA metabolic process	GO	0.00712701	132
GO:0006793 phosphorus metabolic process	GO	0.00741502	264
GO:0009266 response to temperature stimulus	GO	0.00750068	81
GO:0072528 pyrimidine-containing compound biosynthetic process	GO	0.00813385	26
GO:0044255 cellular lipid metabolic process	GO	0.00874526	130
GO:0009124 nucleoside monophosphate biosynthetic process	GO	0.00931984	31
GO:0009314 response to radiation	GO	0.00951554	94
GO:0006520 cellular amino acid metabolic process	GO	0.0111527	198
GO:0009123 nucleoside monophosphate metabolic process	GO	0.0128118	38
GO:0009628 response to abiotic stimulus	GO	0.0128118	234
GO:0006753 nucleoside phosphate metabolic process	GO	0.0132661	123
GO:0009117 nucleotide metabolic process	GO	0.013554	119
GO:1901607 alpha-amino acid biosynthetic process	GO	0.0143024	96
GO:0006629 lipid metabolic process	GO	0.0177014	132
GO:0006796 phosphate-containing compound metabolic process	GO	0.0177014	247
GO:0009156 ribonucleoside monophosphate biosynthetic process	GO	0.017804	28
GO:1902600 proton transmembrane transport	GO	0.0178816	17
GO:0019752 carboxylic acid metabolic process	GO	0.0181709	410
GO:0072527 pyrimidine-containing compound metabolic process	GO	0.0182906	53
GO:0045229 external encapsulating structure organization	GO	0.0184597	19
GO:0017144 drug metabolic process	GO	0.0227614	183
GO:0019438 aromatic compound biosynthetic process	GO	0.0232039	482
GO:0009161 ribonucleoside monophosphate metabolic process	GO	0.0233361	35
GO:0009099 valine biosynthetic process	GO	0.0245839	10
GO:0001522 pseudouridine synthesis	GO	0.0246505	12
GO:1903509 liposaccharide metabolic process	GO	0.0269964	49
GO:0016070 RNA metabolic process	GO	0.0269964	434
GO:0022411 cellular component disassembly	GO	0.0273582	28
GO:0032984 protein-containing complex disassembly	GO	0.0273582	28
GO:0043436 oxoacid metabolic process	GO	0.0273582	419
GO:0051276 chromosome organization	GO	0.0279199	22
GO:0009127 purine nucleoside monophosphate biosynthetic process	GO	0.0303267	27
GO:0009168 purine ribonucleoside monophosphate biosynthetic process	GO	0.0303267	27
GO:0051205 protein insertion into membrane	GO	0.0313352	10
GO:0043650 dicarboxylic acid biosynthetic process	GO	0.0327966	20
GO:0044264 cellular polysaccharide metabolic process	GO	0.0332055	76
GO:0009081 branched-chain amino acid metabolic process	GO	0.0342504	21
GO:0017148 negative regulation of translation	GO	0.0349159	24
GO:0030488 tRNA methylation	GO	0.0358999	12
GO:0009259 ribonucleotide metabolic process	GO	0.0369843	64
GO:0006082 organic acid metabolic process	GO	0.0403119	430
GO:0008104 protein localization	GO	0.0421501	42
GO:0005976 polysaccharide metabolic process	GO	0.0456062	80
GO:0034249 negative regulation of cellular amide metabolic process	GO	0.0456965	25
GO:0008653 lipopolysaccharide metabolic process	GO	0.0456965	38
GO:0009262 deoxyribonucleotide metabolic process	GO	0.0474906	13
GO:0009085 lysine biosynthetic process	GO	0.049441	13
GO:0032502 developmental process	GO	0.0495321	22
GO:0015801 aromatic amino acid transport	GO	0.0542694	10
GO:0034613 cellular protein localization	GO	0.0581305	26
GO:0070727 cellular macromolecule localization	GO	0.0581305	26
GO:0009150 purine ribonucleotide metabolic process	GO	0.0583924	56
GO:0033692 cellular polysaccharide biosynthetic process	GO	0.0599664	68
GO:0043163 cell envelope organization	GO	0.064245	11
GO:0043165 Gram-negative-bacterium-type cell outer membrane assembly	GO	0.064245	11
GO:0044091 membrane biogenesis	GO	0.064245	11
GO:0071709 membrane assembly	GO	0.064245	11
GO:0009126 purine nucleoside monophosphate metabolic process	GO	0.0665416	31
GO:0009167 purine ribonucleoside monophosphate metabolic process	GO	0.0665416	31
GO:0009066 aspartate family amino acid metabolic process	GO	0.0683511	49
GO:0000271 polysaccharide biosynthetic process	GO	0.0683511	70
GO:0032269 negative regulation of cellular protein metabolic process	GO	0.0712425	27
GO:0009103 lipopolysaccharide biosynthetic process	GO	0.0743636	36
GO:0009089 lysine biosynthetic process via diaminopimelate	GO	0.0743636	10
GO:0000270 peptidoglycan metabolic process	GO	0.0743636	56
GO:0006022 aminoglycan metabolic process	GO	0.0743636	56
GO:0030203 glycosaminoglycan metabolic process	GO	0.0743636	56
GO:0009082 branched-chain amino acid biosynthetic process	GO	0.0745655	17
GO:0009244 lipopolysaccharide core region biosynthetic process	GO	0.07627	24
GO:0046401 lipopolysaccharide core region metabolic process	GO	0.07627	24
GO:0009201 ribonucleoside triphosphate biosynthetic process	GO	0.0831615	20
GO:0006163 purine nucleotide metabolic process	GO	0.086647	65
GO:0016032 viral process	GO	0.0920701	13
GO:0007059 chromosome segregation	GO	0.093862	14
GO:0010608 posttranscriptional regulation of gene expression	GO	0.093988	43
GO:0006417 regulation of translation	GO	0.0940672	38
GO:0006573 valine metabolic process	GO	0.0951464	14
GO:0006310 DNA recombination	GO	0.0951464	41
GO:0006644 phospholipid metabolic process	GO	0.0981565	39
