# Supplementary material for: Evolved bacterial resistance against fluoropyrimidines can lower chemotherapy impact in the Caenorhabditis elegans host
Source: eLife. 2020 Nov 30;9:e59831. doi: 10.7554/eLife.59831 (PMC7725501; doi:10.7554/eLife.59831)
Supplement: Supplementary file 8. [file elife-59831-supp8.xlsx]

## Sheet: Phenotypes
							Drug doses (µM)
Species	Drug	Coordinate	Strain	Summary			0	2.5	5	10	20	40	80	160	Notes		1- Phenotypes key:
E. coli	5-FU	C01	Ancestor		Bio #01	1.1			DD	DD	A	A	A	A				blank = developed (~ L4 stage)
						1.2			DD	DD	A	A	A	A				DD = developmental delay (~ L2-L3 stage)
					Bio #02	2.1		DD	DD	DD	A	A	A	A				A = developmental arrest (L1 stage)
						2.2		DD	DD	A	A	A	A	A
					Bio #03	3.1		DD	DD	A	A	A	A	A
						3.2		DD	DD	A	A	A	A	A			2- Representative pictures:
		A01	S1C5		Bio #01	1.1							DD	DD
						1.2							DD	DD
					Bio #02	2.1							DD	DD
						2.2							DD	DD							A = L1 arrested
					Bio #03	3.1							DD	A
						3.2						DD	DD	DD
		A02	S2C10		Bio #01	1.1						DD	DD	A
						1.2						DD	DD	A
					Bio #02	2.1							DD	DD
						2.2							DD	DD
					Bio #03	3.1							DD	DD										DD = developmental delay (~ L2-L3 stage)
						3.2						DD	DD	DD
		A03	S3C10		Bio #01	1.1							DD	A
						1.2							DD	A
					Bio #02	2.1							DD	DD
						2.2							DD	DD
					Bio #03	3.1						DD	DD	DD
						3.2						DD	DD	DD							blank = developed (~ L4 stage)
		A04	S4C1		Bio #01	1.1							DD	DD
						1.2								DD
					Bio #02	2.1							DD	DD
						2.2							DD	DD
					Bio #03	3.1							DD	DD
						3.2							DD	A
		D05	SE_S1C8		Bio #01	1.1			DD	DD	A	A	A	A
						1.2			DD	A	A	A	A	A
					Bio #02	2.1		DD	DD	A	A	A	A	A
						2.2		DD	DD	A	A	A	A	A
					Bio #03	3.1		DD	DD	A	A	A	A	A
						3.2		DD	DD	A	A	A	A	A
		D06	SE_S1C9		Bio #01	1.1		DD	DD	DD	A	A	A	A
						1.2			DD	A	A	A	A	A
					Bio #02	2.1		DD	DD	DD	A	A	A	A
						2.2		DD	DD	DD	A	A	A	A
					Bio #03	3.1		DD	DD	DD	A	A	A	A
						3.2		DD	DD	DD	A	A	A	A
		D07	SE_S2C9		Bio #01	1.1			DD	DD	A	A	A	A
						1.2			DD	A	A	A	A	A
					Bio #02	2.1		DD	DD	A	A	A	A	A
						2.2		DD	DD	A	A	A	A	A
					Bio #03	3.1		DD	DD	A	A	A	A	A
						3.2		DD	DD	A	A	A	A	A
		D08	SE_S2C10		Bio #01	1.1			DD	DD	A	A	A	A
						1.2			DD	DD	A	A	A	A
					Bio #02	2.1		DD	DD	DD	A	A	A	A
						2.2		DD	DD	DD	A	A	A	A
					Bio #03	3.1		DD	DD	DD	A	A	A	A
						3.2		DD	DD	A	A	A	A	A
		D09	SE_S3C6		Bio #01	1.1			DD	DD	A	A	A	A
						1.2			DD	DD	A	A	A	A
					Bio #02	2.1		DD	DD	A	A	A	A	A
						2.2		DD	DD	A	A	A	A	A
					Bio #03	3.1		DD	DD	A	DD	A	A	A
						3.2		DD	DD	DD	A	A	A	A
		D10	SE_S3C8		Bio #01	1.1			DD	DD	A	A	A	A
						1.2			DD	A	A	A	A	A
					Bio #02	2.1		DD	DD	DD	A	A	A	A
						2.2		DD	DD	DD	A	A	A	A
					Bio #03	3.1		DD	DD	DD	A	A	A	A
						3.2		DD	DD	A	A	A	A	A
		D11	SE_S4C4		Bio #01	1.1			DD	DD	A	A	A	A
						1.2			DD	A	A	A	A	A
					Bio #02	2.1		DD	DD	A	A	A	A	A
						2.2		DD	DD	A	A	A	A	A
					Bio #03	3.1		DD	DD	A	A	A	A	A
						3.2		DD	DD	A	A	A	A	A
		D12	SE_S4C5		Bio #01	1.1				A	A	A	A	A
						1.2			DD	A	A	A	A	A
					Bio #02	2.1		DD	DD	A	A	A	A	A
						2.2		DD	DD	A	A	A	A	A
					Bio #03	3.1		DD	DD	A	A	A	A	A
						3.2		DD	A	A	A	A	A	A
	FUDR	C01	Ancestor		Bio #01	1.1		DD	DD	A	A	A	A	A
						1.2		DD	DD	A	A	A	A	A
					Bio #02	2.1		DD	DD	A	A	A	A	A
						2.2			DD	A	A	A	A	A
					Bio #03	3.1		DD	DD	A	A	A	A	A
						3.2		DD	DD	A	A	A	A	A
		A05	S5C1		Bio #01	1.1							DD	A
						1.2							DD	A
					Bio #02	2.1							DD	A
						2.2							DD	A
					Bio #03	3.1						DD	DD	A
						3.2							DD	A
		A06	S5C7		Bio #01	1.1					DD	DD	A	A
						1.2					DD	DD	A	A
					Bio #02	2.1							DD	A
						2.2							DD	A
					Bio #03	3.1						DD	DD	A
						3.2						DD	DD	A
		A07	S6C2		Bio #01	1.1							DD	A
						1.2							DD	A
					Bio #02	2.1							DD	A
						2.2							DD	A
					Bio #03	3.1						DD	A	A
						3.2						DD	DD	A
		A08	S6C6		Bio #01	1.1						DD	DD	A
						1.2						DD	DD	A
					Bio #02	2.1							DD	DD
						2.2							DD	DD
					Bio #03	3.1						DD	A	A
						3.2						DD	A	A
		A09	S7C1		Bio #01	1.1								DD
						1.2								DD
					Bio #02	2.1							DD	DD
						2.2							DD	DD
					Bio #03	3.1						DD	DD	A
						3.2							DD	A
		A10	S7C6		Bio #01	1.1								DD
						1.2								DD
					Bio #02	2.1							DD	DD
						2.2							DD	DD
					Bio #03	3.1							DD	A
						3.2							DD	A
		A11	S8C3		Bio #01	1.1								DD
						1.2							DD	DD
					Bio #02	2.1							DD	DD
						2.2							DD	DD
					Bio #03	3.1							DD	DD
						3.2							DD	DD
		A12	S8C8		Bio #01	1.1				DD	DD	DD	A	A
						1.2				DD	DD	DD	A	A
					Bio #02	2.1				DD	DD	DD	A	A
						2.2					DD	DD	A	A
					Bio #03	3.1				DD	DD	A	A	A
						3.2				DD	DD	A	A	A
		B01	S8C10		Bio #01	1.1							DD	A
						1.2							DD	A
					Bio #02	2.1							DD	DD
						2.2							DD	DD
					Bio #03	3.1						DD	DD	A
						3.2							DD	A
		B02	S9C5		Bio #01	1.1		DD	DD	A	A	A	A	A
						1.2		DD	DD	A	A	A	A	A
					Bio #02	2.1		DD	DD	A	A	A	A	A
						2.2		DD	DD	A	A	A	A	A
					Bio #03	3.1		DD	DD	A	A	A	A	A
						3.2		DD	DD	A	A	A	A	A
		B03	S9C7		Bio #01	1.1		DD	DD	A	A	A	A	A
						1.2		DD	A	A	A	A	A	A
					Bio #02	2.1		DD	DD	A	A	A	A	A
						2.2		DD	DD	A	A	A	A	A
					Bio #03	3.1		DD	DD	A	A	A	A	A
						3.2		DD	DD	A	A	A	A	A
		B04	S10C1		Bio #01	1.1		DD	DD	A	A	A	A	A
						1.2		DD	DD	A	A	A	A	A
					Bio #02	2.1		DD	DD	A	A	A	A	A
						2.2		DD	DD	A	A	A	A	A
					Bio #03	3.1		DD	DD	A	A	A	A	A
						3.2		DD	DD	A	A	A	A	A
		B05	S10C5		Bio #01	1.1		DD	DD	A	A	A	A	A
						1.2		DD	DD	A	A	A	A	A
					Bio #02	2.1		DD	DD	A	A	A	A	A
						2.2		DD	DD	A	A	A	A	A
					Bio #03	3.1		DD	DD	A	A	A	A	A
						3.2		DD	DD	A	A	A	A	A
		B06	S10C8		Bio #01	1.1		DD	DD	A	A	A	A	A
						1.2		DD	A	A	A	A	A	A
					Bio #02	2.1		DD	DD	A	A	A	A	A
						2.2		DD	DD	A	A	A	A	A
					Bio #03	3.1		DD	DD	A	A	A	A	A
						3.2		DD	DD	A	A	A	A	A
		B07	S11C5		Bio #01	1.1		DD	DD	A	A	A	A	A
						1.2		DD	DD	A	A	A	A	A
					Bio #02	2.1		DD	DD	A	A	A	A	A
						2.2		DD	DD	A	A	A	A	A
					Bio #03	3.1		DD	DD	A	A	A	A	A
						3.2		DD	DD	A	A	A	A	A
		B08	S11C6		Bio #01	1.1		DD	DD	A	A	A	A	A
						1.2		DD	DD	A	A	A	A	A
					Bio #02	2.1		DD	DD	A	A	A	A	A
						2.2			DD	A	A	A	A	A
					Bio #03	3.1		DD	DD	A	A	A	A	A
						3.2		DD	DD	A	A	A	A	A
		B09	S12C1		Bio #01	1.1		DD	DD	A	A	A	A	A
						1.2		DD	DD	A	A	A	A	A
					Bio #02	2.1		DD	DD	A	A	A	A	A
						2.2		DD	DD	A	A	A	A	A
					Bio #03	3.1		DD	DD	A	A	A	A	A
						3.2		DD	DD	A	A	A	A	A
		B10	S12C8		Bio #01	1.1		DD	DD	A	A	A	A	A
						1.2		DD	DD	A	A	A	A	A
					Bio #02	2.1		DD	DD	A	A	A	A	A
						2.2		DD	DD	DD	A	A	A	A
					Bio #03	3.1		DD	DD	A	A	A	A	A
						3.2		DD	DD	DD	A	A	A	A
